# Supplementary material for: Expression of Protein-Coding Gene Orthologs in Zebrafish and Mouse Inner Ear Non-sensory Supporting Cells
Source: Front Neurosci. 2019 Oct 18;13:1117. doi: 10.3389/fnins.2019.01117 (PMC6813431; doi:10.3389/fnins.2019.01117)
Supplement: Supplementary file 5 [file Data_Sheet_1.xlsx]

## Sheet: All orthologs
ZF Gene stable ID	ZF Gene name	Mouse gene stable ID	Mouse gene name	Homology type	%id. target Mouse gene identical to zebra gene	%id. zebra gene identical to target Mouse gene	Gene-order conservation score	Whole-genome alignment coverage	High confidence ortholog [0 low, 1 high]	Zebrafish ANOVA FDR p-value correction	Zf HC 1	Zf HC 2	Zf HC 3	ZF HC AVERAGE	Zf nsSC 1	Zf nsSC 2	Zf nsSC 3	ZF SC AVERAGE	Zf Microglia1	Zf Microglia2	Zf Microglia3	ZF Microglia AVERAGE	Zf LIVER 1	Zf LIVER 2	Zf LIVER 3	ZF LIVER AVERAGE	Mouse ANOVA FDR p-value correction	MOUSE IHC1	MOUSE IHC2	MOUSE IHC3	MOUSE IHC4	MOUSE IHC AVERAGE	MOUSE OHC1	MOUSE OHC2	MOUSE OHC3	MOUSE OHC4	MOUSE OHC5	MOUSE OHC6	MOUSE OHC AVERAGE	MOUSE DEITER1	MOUSE DEITER2	MOUSE DEITER3	MOUSE DEITER4	MOUSE DEITER5	MOUSE DEITER6	MOUSE DEITER AVERAGE	MOUSE PILLAR1	MOUSE PILLAR2	MOUSE PILLAR3
ENSDARG00000000001	slc35a5	ENSMUSG00000022664	Slc35a5	ortholog_one2one	53.4091	53.7757	25	49.5	0	0.0191181	2.58	2.22	2.34	2.38	2.07	1.56	1.86	1.83	1.21	2.58	3.98	2.59	2.3	3.06	2.81	2.72333	3.82422e-11	15.1699	15.9052	15.2358	15.7079	15.5047	23.0541	22.3171	21.9206	22.1342	24.0088	22.78	22.7025	26.9464	27.4642	27.4678	27.3615	30.1826	29.7098	28.1887	24.3271	24.7237	24.7875
ENSDARG00000000002	ccdc80	ENSMUSG00000022665	Ccdc80	ortholog_one2many	44.8357	40.2529	25	70.06	0	0.063558	0.54	0.48	0.35	0.456667	35.42	33.65	34.4	34.49	0	0.04	0	0.0133333	0.59	0.76	0.43	0.593333	0	8.70638	8.44818	7.95126	8.38429	8.37253	13.6721	12.799	12.7903	12.824	13.7641	12.6607	13.085	42.1786	41.7706	39.0806	38.3475	41.7666	39.8196	40.4939	24.5931	26.0812	23.3786
ENSDARG00000000018	nrf1	ENSMUSG00000058440	Nrf1	ortholog_one2one	82.9365	78.2772	50	54.65	0	2.66751e-09	33.2	31.57	31.75	32.1733	13.69	13.73	12.48	13.3	5.19	5.2	4.72	5.03667	3.06	2.04	2.12	2.40667	2.98029e-12	2.9184	3.0004	2.86705	2.72742	2.87832	3.61397	3.38777	3.2739	3.27147	3.32914	2.97935	3.30927	2.92309	2.61088	2.5096	2.7396	3.04529	3.0693	2.81629	4.25074	4.65024	4.71674
ENSDARG00000000019	ube2h	ENSMUSG00000039159	Ube2h	ortholog_one2one	98.3607	98.3607	75	100	1	0.00029734	79.87	83.62	82.46	81.9833	20.33	23.28	18.15	20.5867	22.47	25.72	16.22	21.47	32.37	28.52	23.68	28.19	0	13.1208	13.5084	13.835	13.949	13.6033	17.6086	18.2272	17.8827	19.0262	17.8186	16.8749	17.9064	22.9961	23.8301	22.725	22.1204	24.604	24.8646	23.5234	21.5496	21.9691	20.357
ENSDARG00000000068	slc9a3r1a	ENSMUSG00000020733	Slc9a3r1	ortholog_one2many	48.5411	51.5493	0	12.38	0	0.0167533	5.93	5.21	6	5.71333	26.02	26.37	27.2	26.53	8.12	9.37	19.2	12.23	7.42	4.37	5.28	5.69	0	61.135	64.3371	66.0023	65.403	64.2194	55.9796	57.7148	59.6321	59.7896	55.2286	56.8859	57.5384	302.096	298.634	294.576	292.499	301.225	304.54	298.928	120.488	116.802	120.897
ENSDARG00000000069	dap	ENSMUSG00000039168	Dap	ortholog_one2one	59.0476	60.7843	75	25.72	1	2.09007e-05	68.06	72.32	62.89	67.7567	36.72	32.86	31.98	33.8533	7.44	8.86	9.65	8.65	26.48	35.24	35.07	32.2633	3.53792e-07	42.9724	45.4227	41.9597	44.0604	43.6038	26.0819	26.0371	25.0514	25.8873	23.5349	25.5754	25.3613	56.2265	56.7372	57.672	56.9719	56.064	52.9056	56.0962	42.5708	46.1356	42.4568
ENSDARG00000000086	itsn1	ENSMUSG00000022957	Itsn1	ortholog_one2one	76.9759	78.4131	25	58.2	0	0.0250521	1.39	2.89	1.99	2.09	6.17	6.95	6.63	6.58333	0.65	0.23	1.06	0.646667	2.6	3.14	2.66	2.8	3.34134e-11	0.647676	0.680394	0.558042	0.569902	0.614003	0.540603	0.489459	0.51182	0.493216	0.607485	0.498645	0.523538	1.82781	1.84368	1.85576	1.82411	1.91436	2.0172	1.88049	1.12822	1.17026	1.14728
ENSDARG00000000142	tmem267	ENSMUSG00000074634	Tmem267	ortholog_one2one	55.7447	55.042	0	44.99	0	0.550856	0	0	0	0	0	0	0	0	0	0	0	0	0	0	0	0	0.235651	0.341628	0.549225	0.114626	0.228763	0.308561	0.226814	0.481319	0.275756	0.223582	0.176163	0.0290055	0.23544	0.191137	0.0804333	0.121373	0.0604029	0.188277	0.0623961	0.117337	0.144841	0.172859	0.0908566
ENSDARG00000000151	thraa	ENSMUSG00000058756	Thra	ortholog_one2many	77.7506	64.6341	0	12.54	0	2.42737e-05	11.02	8.76	8.52	9.43333	7.66	7.28	7.22	7.38667	1.49	2.73	0.74	1.65333	0.76	1.36	0.81	0.976667	2.18778e-06	3.65209	3.59578	2.91766	3.71898	3.47113	4.08294	4.49953	4.28313	5.48327	4.16761	4.7639	4.54673	5.66162	5.73848	6.96806	5.85812	5.80678	5.91232	5.9909	3.68135	3.40429	3.91629
ENSDARG00000000161	itsn2a	ENSMUSG00000020640	Itsn2	ortholog_one2many	54.2217	56.9361	25	1.79	0	0.00179458	0.24	0.2	0.27	0.236667	0.45	0.63	0.51	0.53	0.02	0.05	0	0.0233333	0.16	0.07	0.12	0.116667	1.87538e-12	7.22453	7.19003	6.99185	6.51834	6.98119	8.73253	8.25563	8.40223	9.09186	8.60978	8.68841	8.63007	7.49101	7.37079	6.22164	6.91904	6.97326	6.8436	6.96989	7.0347	5.9402	7.61479
ENSDARG00000000175	hoxb2a	ENSMUSG00000075588	Hoxb2	ortholog_one2one	48.4108	55.9322	25	94.78	0	0.0159358	0	0	0	0	0.13	0.33	0.19	0.216667	0.05	0.05	0.04	0.0466667	0.04	0	0.05	0.03	0.250485	0	0	0	0	0	0	0	0	0	0	0	0	0	0	0	0	0	0	0	0	0	0
ENSDARG00000000183	ptpn4b	ENSMUSG00000026384	Ptpn4	ortholog_one2many	79.3326	79.5896	0	0.74	0	0.00549758	2.97	3.18	2.75	2.96667	0.7	0.73	0.66	0.696667	0.45	0.37	0.07	0.296667	0.2	0.27	0.12	0.196667	0	0.819842	0.752554	0.720418	0.597624	0.722609	0.900723	0.744276	1.0691	0.981944	1.03158	0.685263	0.902148	0.827045	0.535971	0.680108	0.777552	0.788873	0.60477	0.702386	0.684383	0.724271	0.898968
ENSDARG00000000189	sema6e	ENSMUSG00000038777	Sema6c	ortholog_one2many	39.0977	43.1983	50	7.85	0	5.0066e-07	1.45	1.85	1.46	1.58667	4.12	3.85	4.17	4.04667	1.15	0.74	0.29	0.726667	0.39	0.14	0.1	0.21	0	0.759149	0.982181	0.711933	1.02432	0.869395	0.451372	0.556173	0.54169	0.43597	0.25445	0.251373	0.415171	3.56535	4.39926	3.54129	3.68177	3.57157	3.37067	3.68832	0.234313	0.116516	0.104986
ENSDARG00000000212	krt97	ENSMUSG00000017588	Krt27	ortholog_many2many	40.2174	41.2946	50	0	0	0.550856	0.51	1.13	0.75	0.796667	291.49	331.55	305.67	309.57	0.72	0.2	0.69	0.536667	35.07	0.05	2.57	12.5633	1	0	0	0	0	0	0	0	0	0	0	0	0	0	0	0	0	0	0	0	0	0	0
ENSDARG00000000229	usp49	ENSMUSG00000090115	Usp49	ortholog_one2one	62.5578	59.2701	50	0	0	1.65366e-07	3.43	3.86	3.3	3.53	2.17	2.47	2.07	2.23667	0.26	0.56	0.28	0.366667	0.78	0.61	0.83	0.74	2.08403e-12	0.16802	0.104511	0.125964	0.159976	0.139617	0.463248	0.222706	0.198348	0.323872	0.246384	0.509991	0.327425	0.163669	0.0428553	0.0848772	0.0965489	0.0376181	0.112202	0.0896284	0.173637	0.103612	0.169431
ENSDARG00000000241	slc40a1	ENSMUSG00000025993	Slc40a1	ortholog_one2one	68.5053	67.5439	25	64.92	0	0.00579133	0.33	0.09	0.12	0.18	7.74	6.33	7.39	7.15333	11.11	15.5	4.26	10.29	12.12	21.31	18.62	17.35	1.7403e-13	0.213249	0.198966	0.0726692	0.174034	0.16473	0.178941	0.102784	0.195799	0.170092	0.1638	0.17653	0.164658	0.387758	0.435132	0.569406	0.474838	0.397871	0.506331	0.461889	1.35166	1.3881	1.12128
ENSDARG00000000324	dcaf8	ENSMUSG00000035395	Pet2	ortholog_one2many	45.0406	37.0817	25	81.7	1	0.000418428	0.07	0.08	0	0.05	0.37	0.35	0.49	0.403333	0.23	0.1	0.52	0.283333	6.75	5.7	7.2	6.55	0.551736	0	0	0	0	0	0	0	0	0	0	0	0	0	0	0	0	0	0	0	0	0	0
ENSDARG00000000349	si:rp71-1p14.7	ENSMUSG00000053070	9230110C19Rik	ortholog_one2one	48.1618	49.0637	75	44.56	0	5.80565e-05	0	0	0	0	0	0	0	0	0	0	0	0	0	0	0	0	8.47449e-07	2.03769	1.74629	1.29619	1.90933	1.74738	1.30275	1.25497	1.1879	1.26412	0.948592	0.812172	1.12842	1.52913	1.90569	1.76462	1.95152	1.82488	1.61274	1.76476	2.55817	0.868745	0.913246
ENSDARG00000000369	prkag3b	ENSMUSG00000006542	Prkag3	ortholog_one2many	61.9883	43.3538	0	0	0	0.00221973	0	0	0	0	0	0	0	0	0	0	0	0	0.08	0.2	0.07	0.116667	1.45328e-07	1.90892	1.87545	1.84144	1.59783	1.80591	0.140819	0.11796	0.154085	0.078082	0.164058	0.0810373	0.122674	0	0	0	0	0	0	0	0	0	0
ENSDARG00000000370	triob	ENSMUSG00000022263	Trio	ortholog_one2many	79.531	76.5066	25	0.54	0	3.98795e-08	4.4	4.54	4.45	4.46333	0.39	0.55	0.66	0.533333	0.37	0.1	0.04	0.17	0.03	0.03	0.01	0.0233333	0	0.180316	0.19506	0.205178	0.19621	0.194191	0.210514	0.188937	0.263252	0.308492	0.166423	0.224983	0.2271	0.179211	0.311943	0.289674	0.297329	0.32765	0.390907	0.299453	1.00248	0.979808	0.939648
ENSDARG00000000380	pde6a	ENSMUSG00000024575	Pde6a	ortholog_one2one	77.5058	77.3256	50	51.28	0	7.01119e-05	2.03	2.26	4.09	2.79333	0.01	0.01	0	0.00666667	0	0	0	0	0.02	0.02	0.04	0.0266667	3.11012e-05	0	0	0	0	0	0	0	0	0	0	0	0	0	0	0	0	0	0	0	0	0	0
ENSDARG00000000442	slc39a13	ENSMUSG00000002105	Slc39a13	ortholog_one2one	50.1285	52.139	25	44.5	0	7.2456e-06	4.25	4.78	5.83	4.95333	6.53	5.53	6.27	6.11	6.73	5.14	6.03	5.96667	0.9	0.74	0.98	0.873333	7.09085e-14	10.5861	10.5355	10.8778	10.9553	10.7386	10.8086	10.3832	11.3608	11.3173	10.504	9.62119	10.6658	10.211	9.76186	10.4069	9.76266	9.3258	9.38174	9.80832	16.5859	18.585	17.5535
ENSDARG00000000472	cntn2	ENSMUSG00000053024	Cntn2	ortholog_one2one	60.4953	49.3269	25	45.71	0	0.86632	0	0.02	0	0.00666667	0.11	0.16	0.09	0.12	0.13	0	0	0.0433333	0.09	0.02	0	0.0366667	0.000675243	0.00968519	0	0	0.0105389	0.00505601	0	0	0	0.0206003	0	0	0.00343339	0	0	0	0	0	0	0	0	0	0
ENSDARG00000000474	tnni1a	ENSMUSG00000026418	Tnni1	ortholog_one2many	77.9006	75.4011	75	74.49	1	1	0	0	0	0	0	0	0	0	0	0	0	0	0	0	0	0	4.54122e-07	0.0500617	0	0.136477	0.108948	0.0738717	0	0	0	0	0	0	0	0	0	0	0	0	0	0	0	0	0
ENSDARG00000000476	pms1	ENSMUSG00000026098	Pms1	ortholog_one2one	46.2054	45.1472	75	86.13	0	0.00338501	2.74	3.3	3.14	3.06	1.15	1	0.58	0.91	0.82	0.87	1.07	0.92	0.38	0.35	0.4	0.376667	2.65084e-05	2.24428	2.30704	1.9482	2.23324	2.18319	1.64251	1.33792	1.85922	1.96282	1.58365	1.45042	1.63942	0.813105	0.828517	0.460311	0.543002	0.775752	0.631036	0.675287	2.31118	2.05574	2.07596
ENSDARG00000000489	upf3b	ENSMUSG00000036572	Upf3b	ortholog_one2one	53.9615	53.3898	75	53.56	1	0.00142142	21.16	19.47	21.01	20.5467	39.13	44.48	37.92	40.51	8.12	13.36	7.37	9.61667	6.45	6.8	6.41	6.55333	1.77959e-15	6.33188	5.89798	6.04471	6.1544	6.10724	7.23915	7.03786	6.73885	7.47682	7.57786	7.51109	7.2636	4.94021	4.94275	5.51589	6.42237	4.84323	6.25979	5.48737	2.45908	2.59385	2.54494
ENSDARG00000000503	stx1b	ENSMUSG00000030806	Stx1b	ortholog_one2one	97.2222	97.2222	0	2.97	0	0.0344523	0.94	0.59	0.7	0.743333	0.6	0.51	0.53	0.546667	0.78	0.96	0.23	0.656667	0.0065	0.00251	0.00575	0.00492	1.92567e-06	0.394071	0.280135	0.368334	0.142935	0.296369	0.359916	0.217073	0.413513	0.179611	0.188691	0.372819	0.288604	0.448456	0.631791	0.758363	0.690117	0.403333	0.556946	0.581501	0.703308	0.925759	0.735292
ENSDARG00000000516	ankar	ENSMUSG00000039342	Ankar	ortholog_one2one	46.5714	44.5051	0	90.09	0	0.000417158	0.14	0.09	0.11	0.113333	0.05	0.09	0.13	0.09	0.1	0	0	0.0333333	0.12	0.08	0.04	0.08	1	0	0	0	0	0	0	0	0	0	0	0	0	0	0	0	0	0	0	0	0	0	0
ENSDARG00000000529	ofd1	ENSMUSG00000040586	Ofd1	ortholog_one2one	34.6275	32.3847	75	39.85	0	1.48763e-05	7.88	8.69	6.36	7.64333	2.76	2.74	2.89	2.79667	0.54	0.24	0.74	0.506667	0.56	0.5	0.39	0.483333	8.98063e-13	2.83304	2.83965	2.89075	2.77448	2.83448	2.77509	3.16016	2.7817	2.56099	3.0522	3.462	2.96536	2.06057	2.29167	2.10291	1.76749	1.93308	2.33031	2.08101	1.87377	1.81915	2.00562
ENSDARG00000000540	asnsd1	ENSMUSG00000099913	Gm28551	ortholog_one2many	43.8111	47.4427	50	85.85	0	1.92487e-07	17.68	14.73	16.12	16.1767	10	10.88	10.56	10.48	3.69	3.3	4.29	3.76	1.28	1.77	1.89	1.64667	0.000191318	0	0.627936	0.0312741	0.0624148	0.180406	0.137517	0.276465	0.0300944	0.0915016	0.0961272	0.0633099	0.115836	0.0297994	0.0292601	0.033115	0.0329601	0.102737	0.238335	0.0777011	0.126457	0	0
ENSDARG00000000542	gtf2e1	ENSMUSG00000022828	Gtf2e1	ortholog_one2one	70.2461	71.3636	25	100	1	0.000392561	3.78	3.33	3.6	3.57	0.71	1.23	1.12	1.02	2.69	3.12	4.23	3.34667	1.73	1.84	1.65	1.74	0.000232663	3.02521	2.82526	2.95494	3.08904	2.97361	3.35489	3.20649	4.37804	4.25415	3.66827	3.51314	3.72916	2.32399	2.48671	2.76466	2.45514	2.70499	2.67233	2.56797	2.78161	2.68781	2.36284
ENSDARG00000000551	slc1a4	ENSMUSG00000020142	Slc1a4	ortholog_one2one	72.5339	70.4887	75	81.71	1	0.00767569	0	0.02	0.06	0.0266667	0.05	0.04	0.11	0.0666667	1.54	3.37	1.45	2.12	0.13	0.02	0.00682	0.0522733	4.23067e-06	2.22638	2.17006	1.95225	2.44759	2.19907	5.899	5.97394	6.02119	6.2489	5.41082	5.92807	5.91365	4.31661	4.00431	3.97532	3.90397	4.74143	4.35978	4.2169	3.31444	2.44078	3.1742
ENSDARG00000000563	ttn.1	ENSMUSG00000051747	Ttn	ortholog_one2many	57.2345	49.8551	75	38.19	1	2.14629e-09	0	0	0	0	0	0	0	0	0	0	0	0	0	0	0	0	5.04495e-15	0.00308533	0.00383825	0.00925227	0.00335728	0.00488328	0.0103559	0.00966618	0.0129502	0.0196874	0.0137884	0.0110676	0.0129193	0.00961744	0.0118042	0.0106875	0.0141834	0.0138156	0.0183143	0.0130704	0.0263582	0.0143754	0.0177786
ENSDARG00000000567	znf281a	ENSMUSG00000041483	Zfp281	ortholog_one2many	38.7409	35.8343	0	28.11	0	0.0424024	0.25	0.55	0.6	0.466667	0.92	0.72	0.86	0.833333	0.8	1.45	2.79	1.68	1.36	0.89	0.96	1.07	5.33787e-07	4.47178	4.17795	4.55789	3.97219	4.29495	5.09359	4.78578	4.99885	4.63926	5.24084	6.04374	5.13368	3.50851	2.81187	2.65545	2.60108	3.24741	4.11704	3.15689	3.38014	3.92194	3.23937
ENSDARG00000000568	ell	ENSMUSG00000070002	Ell	ortholog_one2one	56.2401	59.1362	25	62.31	0	0.00462544	20.13	20.64	21.27	20.68	8.41	8.85	8.69	8.65	5.99	6.82	10.84	7.88333	19.32	9.94	11.37	13.5433	1.06589e-07	9.77072	9.46437	8.9474	8.9283	9.2777	15.1812	15.8191	16.6417	16.9896	16.1965	13.8885	15.7861	10.3029	10.708	9.67493	10.3961	9.34752	9.67209	10.0169	6.99926	6.19814	6.91659
ENSDARG00000000588	grasp	ENSMUSG00000000531	Grasp	ortholog_one2one	44.5026	43.3673	25	4.67	0	1.5965e-05	0.23	0.4	0.29	0.306667	10.91	11.38	12.21	11.5	45.1	53.9	34.73	44.5767	1.88	2.65	1.28	1.93667	0.000364432	0	0	0	0	0	0.128787	0.129457	0.0939461	0.238034	0	0.0494088	0.106605	0.232563	0.228354	0.103375	0.154338	0.481075	0.478293	0.279666	0.740179	0.441678	0.206357
ENSDARG00000000606	dnah6	ENSMUSG00000052861	Dnah6	ortholog_one2one	71.0545	71.3803	0	48.67	0	5.19327e-10	5.73	5.81	5.04	5.52667	0.01	0.01	0	0.00666667	0.03	0	0	0.01	0.03	0.02	0.00607	0.01869	0.00486386	0	0	0	0	0	0	0	0	0	0	0	0	0	0	0	0	0	0	0	0	0	0
ENSDARG00000000631	ptpn4a	ENSMUSG00000026384	Ptpn4	ortholog_one2many	72.9122	73.5421	50	83.85	1	1.56116e-08	12.62	13.43	11.48	12.51	2.73	4.5	2.9	3.37667	4.38	4.73	4.27	4.46	2.78	2.44	2.2	2.47333	0	0.819842	0.752554	0.720418	0.597624	0.722609	0.900723	0.744276	1.0691	0.981944	1.03158	0.685263	0.902148	0.827045	0.535971	0.680108	0.777552	0.788873	0.60477	0.702386	0.684383	0.724271	0.898968
ENSDARG00000000651	osgepl1	ENSMUSG00000026096	Osgepl1	ortholog_one2one	61.3861	59.9034	50	90.79	1	0.000980508	2.86	3.27	2.99	3.04	1.72	0.81	1.04	1.19	1.69	0.64	0.81	1.04667	0.85	0.59	1.02	0.82	0.000147681	4.64701	4.47893	4.8756	4.65782	4.66484	3.55673	3.87199	3.55338	3.39865	3.86527	3.43021	3.61271	2.80265	2.60236	2.86058	2.5271	2.60817	2.78453	2.69757	1.68058	1.59103	1.09813
ENSDARG00000000656	psmb9a	ENSMUSG00000096727	Psmb9	ortholog_one2one	62.844	62.5571	25	31.55	0	1.68586e-08	0.57	0.5	0.39	0.486667	24.67	23.16	28.16	25.33	34.93	38.88	35.34	36.3833	4.57	7.74	3.5	5.27	1.96619e-08	0.0985089	0.147058	0.187987	0.0535958	0.121787	0.283408	0.0949609	0.310107	0.130955	0.16509	0.0815467	0.177678	1.89358	1.6583	1.45024	1.55667	1.82324	2.1343	1.75272	1.11304	1.24195	1.13527
ENSDARG00000000666	creg2	ENSMUSG00000050967	Creg2	ortholog_one2one	48.3871	46.875	0	92.01	0	1.92786e-07	93.23	90.31	96.91	93.4833	88.23	80.25	90.48	86.32	15.37	22.25	18.42	18.68	36.66	28.14	27.37	30.7233	9.38541e-06	0	0	0	0	0	0	0	0	0	0	0	0	0	0	0	0	0	0.0175633	0.00292722	0.472932	0.308157	0.306893
ENSDARG00000000690	sypl2b	ENSMUSG00000027887	Sypl2	ortholog_one2many	49.569	43.5606	75	9.81	1	4.87606e-10	0.85	0.82	0.98	0.883333	12.28	12.44	12.42	12.38	34.6	32.97	31.68	33.0833	1.31	1.1	0.41	0.94	3.48662e-10	0.329398	0.245869	0.246949	0.425638	0.311964	0.513323	0.535839	0.410459	0.459787	0.391024	0.613529	0.487327	0.106957	0.105021	0.309028	0.118301	0.172082	0.171087	0.163746	0.226941	0.33855	0.166083
ENSDARG00000000729	daxx	ENSMUSG00000002307	Daxx	ortholog_one2one	33.1006	32.027	25	22.81	0	0.0010911	7.22	9.02	7.72	7.98667	9.5	9.8	7.55	8.95	2.75	2.33	2.03	2.37	1.45	1.19	1.17	1.27	3.19413e-12	4.6853	4.36966	4.59505	4.80969	4.61492	6.44305	6.1925	7.45199	7.2705	6.81497	8.35879	7.08863	9.33849	9.25966	9.86714	8.36478	9.60592	9.93518	9.3952	7.27612	7.1071	8.32016
ENSDARG00000000747	lcmt2	ENSMUSG00000074890	Lcmt2	ortholog_one2one	44.4279	43.586	0	29.27	0	0.145398	0	0	0	0	0.3	0.53	0.67	0.5	0.03	1.38	0.69	0.7	0.53	0.59	0.74	0.62	4.0174e-07	5.78324	6.82644	5.66114	5.88322	6.03851	6.62952	7.33819	7.22583	6.83702	6.49143	8.01616	7.08969	6.26062	6.44919	5.71484	5.84268	5.4282	5.49261	5.86469	3.52851	3.56819	2.91398
ENSDARG00000000760	znf511	ENSMUSG00000025470	Zfp511	ortholog_one2one	39.3502	43.6	75	25.66	0	0.040812	8.5	6.42	6.8	7.24	10.78	14.97	10.24	11.9967	0	3.85	4.8	2.88333	0.68	1.26	1.11	1.01667	6.03081e-09	12.5408	12.2743	10.3244	12.2002	11.8349	15.8496	16.5325	14.7718	15.3686	14.7072	13.9335	15.1939	5.99748	7.03283	6.85658	6.39499	6.29735	6.35953	6.48979	12.0389	11.2901	10.3371
ENSDARG00000000767	spi1b	ENSMUSG00000002111	Spi1	ortholog_one2one	44.2568	48.1618	25	36.12	0	2.33169e-05	1.49	0.99	1.04	1.17333	14.46	14.94	14.88	14.76	146.44	208.26	140.15	164.95	1.07	4.13	0.65	1.95	2.3733e-09	0.0334364	0	0.0364614	0.181918	0.0629538	0.320653	0.16116	0.315774	0.177797	0.298856	0.369053	0.273882	1.38968	0.682265	0.656328	0.883821	0.958222	0.952681	0.9205	0.884589	0.879751	0.96335
ENSDARG00000000779	scfd1	ENSMUSG00000020952	Scfd1	ortholog_one2one	87.0253	86.072	100	9.01	1	2.24943e-07	63	61.23	60.33	61.52	47.6	49.46	47.42	48.16	10.93	12.43	12.57	11.9767	15.66	11.56	13.79	13.67	1.13441e-08	48.223	43.5322	45.0197	44.7361	45.3777	35.0045	33.8156	32.8303	36.1148	37.1702	35.2937	35.0382	51.0912	49.1552	49.8591	48.5364	54.8551	53.5147	51.1686	39.4288	42.3313	45.6916
ENSDARG00000000796	nr4a1	ENSMUSG00000023034	Nr4a1	ortholog_one2one	57.069	55.0749	25	48.4	0	0.0018536	57	54.9	53.08	54.9933	2.75	3.21	2.74	2.9	69.39	24.78	38.51	44.2267	0.19	0.33	0.07	0.196667	2.17596e-09	9.68857	10.331	11.3992	10.8992	10.5795	0.838312	1.29912	1.10839	0.581039	1.05805	1.04525	0.988359	0.681219	0.817532	0.841126	0.837193	1.21779	1.59992	0.999129	4.13549	4.43232	3.48403
ENSDARG00000000804	rassf6	ENSMUSG00000029370	Rassf6	ortholog_one2one	44.6746	44.2815	0	23.34	0	0.0282929	0	0	0	0	3.99	3.86	3.57	3.80667	0.11	0	0	0.0366667	2.81	2.27	0.56	1.88	0	40.4339	40.9454	39.9744	38.7763	40.0325	18.4827	18.8442	18.9856	17.6105	17.3581	17.3653	18.1077	24.4802	25.6022	24.2974	23.9125	24.7514	27.1298	25.0289	87.1919	84.2141	79.4167
ENSDARG00000000830	telo2	ENSMUSG00000024170	Telo2	ortholog_one2one	45.0122	44.0476	25	23.57	0	0.000572174	4.64	3.6	3.19	3.81	4.72	4.98	5.12	4.94	1.81	2.29	2.34	2.14667	0.77	0.92	1.08	0.923333	7.45874e-11	1.04676	0.996949	0.95735	1.01654	1.0044	1.98608	2.08321	2.03145	1.78355	2.35157	2.28586	2.08695	1.43848	1.20575	1.29962	1.53931	1.2768	1.50993	1.37831	1.0422	1.14756	0.933942
ENSDARG00000000837	snx9a	ENSMUSG00000002365	Snx9	ortholog_one2many	66.4372	64.8739	0	26.12	0	9.66969e-07	30.78	25.76	27.42	27.9867	4.91	4.83	5.15	4.96333	0.85	0.67	0	0.506667	3.92	3.68	3.74	3.78	1.8513e-11	15.249	16.5524	15.4466	16.9998	16.0619	7.45521	8.64691	7.64768	7.51239	9.18664	8.33301	8.13031	30.485	28.1411	28.6551	28.8218	30.3923	30.7046	29.5333	27.3977	27.4527	24.7239
ENSDARG00000000853	dstyk	ENSMUSG00000042046	Dstyk	ortholog_one2one	67.2112	62.1359	25	8.31	0	3.57221e-05	11.73	13.64	12.74	12.7033	10.46	11.45	9.96	10.6233	0.46	0.65	0.72	0.61	4.91	3.68	4.01	4.2	6.7684e-12	5.3517	4.99985	6.20389	5.99129	5.63668	3.96709	3.90407	4.1182	4.09173	4.06156	3.74637	3.9815	5.48052	6.26675	6.00123	6.01749	5.88376	6.02146	5.9452	3.63526	3.56253	3.3894
ENSDARG00000000857	mapk14a	ENSMUSG00000053436	Mapk14	ortholog_one2many	91.4127	91.6667	0	67.02	0	0.000165475	21.92	22.13	21.44	21.83	27.42	24.15	29.44	27.0033	60.31	57.44	86.38	68.0433	4.01	3.95	3.35	3.77	5.04179e-05	12.0052	12.791	12.7758	12.9284	12.6251	18.1907	18.9825	18.018	18.9644	19.1151	18.1541	18.5708	16.3385	16.0639	14.339	14.9844	14.804	17.4658	15.6659	16.1719	15.6304	17.5027
ENSDARG00000000861	scrib	ENSMUSG00000022568	Scrib	ortholog_one2one	57.7285	62.5826	25	71.22	0	2.57762e-06	4.73	6.8	5.88	5.80333	0.59	0.59	0.52	0.566667	0.33	0.26	1.67	0.753333	6.96	7.22	6.9	7.02667	0.0463413	1.83804	1.67291	1.69597	1.64106	1.712	1.14498	1.07522	1.33527	1.13609	1.19352	1.12707	1.16869	0.995714	0.961666	1.05208	0.920781	1.01297	1.11902	1.01037	1.85295	2.03227	2.35362
ENSDARG00000000906	skap2	ENSMUSG00000059182	Skap2	ortholog_one2one	59.2375	56.4246	75	27.65	1	1.34039e-06	2.47	2.77	2.21	2.48333	14.96	14.93	14.32	14.7367	49.36	59.15	43.86	50.79	1.79	3.08	0.71	1.86	6.20412e-11	4.31196	4.73942	4.11294	4.18037	4.33617	2.66722	2.60394	2.59304	2.52163	2.59322	2.47352	2.57543	3.919	4.14408	3.46555	3.40335	3.84671	3.91948	3.78303	3.69448	4.18977	3.83943
ENSDARG00000000935	unk	ENSMUSG00000020770	Unk	ortholog_one2one	59.0734	56.6667	25	33.37	0	1.51995e-05	3.19	2.54	2.75	2.82667	3.26	4.19	3.2	3.55	1.95	2.43	2.71	2.36333	0.7	0.53	0.69	0.64	2.48104e-12	5.64463	5.6985	6.04459	5.41305	5.70019	7.30193	6.83101	6.64752	6.56447	6.14771	6.79052	6.71386	4.95786	5.65532	5.60327	5.81042	5.74612	5.61647	5.56491	12.0192	11.6641	11.817
ENSDARG00000000966	ncor2	ENSMUSG00000029478	Ncor2	ortholog_one2one	52.7125	50	50	16.72	0	1.66704e-06	5.37	6.43	6.56	6.12	5.03	5.37	5.28	5.22667	2.75	2.38	2.42	2.51667	4.9	3.51	3.38	3.93	1.90385e-12	0.712985	0.991702	0.777489	0.794524	0.819175	0.4778	0.513409	0.603937	0.593815	0.499067	0.455107	0.523856	1.35669	1.39349	1.49773	1.14519	1.27192	1.30536	1.3284	0.804883	0.734559	0.801886
ENSDARG00000001014	myh9b	ENSMUSG00000022443	Myh9	ortholog_one2one	81.6254	70.7143	25	100	1	0.00191699	1.04	0.91	1.05	1	2.75	2.81	2.96	2.84	6.45	1.01	4.85	4.10333	25.09	13.99	20.17	19.75	1.73267e-05	0.501856	0.499459	0.410444	0.447491	0.464812	0.427802	0.48378	0.424218	0.570786	0.545127	0.369282	0.470166	1.40503	1.26582	1.11065	1.25766	1.32336	1.17504	1.25626	1.69805	1.80338	1.77527
ENSDARG00000001015	znf384l	ENSMUSG00000038346	Zfp384	ortholog_one2many	44.4954	33.2192	0	59.72	0	3.74861e-09	2.35	2.5	3.13	2.66	2.62	2.96	2.15	2.57667	2.6	2.6	2.1	2.43333	0.75	0.97	0.67	0.796667	2.12063e-06	3.29794	2.66765	3.09129	2.90145	2.98958	2.71858	3.04388	3.28394	3.2387	3.33971	3.31481	3.1566	3.13509	3.45061	3.4677	3.03215	2.94933	2.8823	3.15286	3.51166	3.15398	2.9112
ENSDARG00000001057	bysl	ENSMUSG00000023988	Bysl	ortholog_one2one	66.7382	71.3303	50	56.59	0	0.0110654	26.01	28.45	22.96	25.8067	24.23	24.32	22.57	23.7067	5.15	8.09	14.37	9.20333	19.92	11.32	17.1	16.1133	5.66145e-07	13.187	13.2636	11.1165	12.8482	12.6038	8.54294	7.66327	8.9061	8.67815	8.48991	8.77435	8.50912	6.65661	6.36915	7.01928	7.52387	7.34273	7.63337	7.09083	6.85581	5.79301	5.41611
ENSDARG00000001127	slc17a6a	ENSMUSG00000030500	Slc17a6	ortholog_one2many	84.4178	84.7079	75	26.24	1	0.711779	0	0	0	0	0.1	0.07	0.03	0.0666667	0	0	0.09	0.03	0	0	0	0	1.8872e-05	0.0834516	0.116274	0.0546009	0.0726457	0.0817431	0.0320118	0.0482675	0.070055	0.0177501	0.0559422	0.0552657	0.0465487	0.156079	0.102169	0.154173	0.172633	0.0797187	0.0792578	0.124005	0	0.0182976	0
ENSDARG00000001129	dicer1	ENSMUSG00000041415	Dicer1	ortholog_one2one	79.4322	77.8069	25	91.14	1	1.19653e-05	0.55	0.63	0.76	0.646667	0.84	0.75	0.81	0.8	1.34	1.47	2.69	1.83333	4.32	3.38	4.22	3.97333	0.00641581	1.65568	1.62046	1.83539	1.61249	1.68101	2.62292	2.60129	2.45727	2.15966	2.5039	2.51401	2.47651	1.77736	2.01584	1.616	1.68203	1.9661	1.55293	1.76838	2.05702	2.03574	1.97135
ENSDARG00000001154	rimbp2	ENSMUSG00000029420	Rimbp2	ortholog_one2many	45.4936	49.1196	25	78.26	0	0.000836918	9.48	9.91	7.84	9.07667	0.2	0.42	0.39	0.336667	0	0	0	0	0.02	0.02	0.00445	0.0148167	0.00574037	0.817642	0.791134	0.767779	0.654926	0.75787	0.566305	0.700616	0.524322	0.724633	0.697826	0.777128	0.665138	0.0353988	0.0231721	0.0393374	0.0130511	0	0.0404454	0.0252341	0.500728	0.560239	0.379537
ENSDARG00000001169	hsd17b8	ENSMUSG00000073422	H2-Ke6	ortholog_one2one	59.7656	59.0734	0	28.68	0	2.11128e-07	15.13	13.28	14.7	14.37	13.45	14.42	10.59	12.82	1.46	0.75	1.07	1.09333	2.65	2.44	2.99	2.69333	0.000516561	63.6008	62.0686	65.2525	64.7294	63.9128	57.0469	48.6175	55.3894	57.2621	56.085	54.7581	54.8598	53.5027	54.8133	52.6684	56.0701	56.0813	53.7333	54.4782	46.7826	46.2045	45.9971
ENSDARG00000001210	arl14ep	ENSMUSG00000027122	Arl14ep	ortholog_one2one	38.8393	31.5217	0	4.33	0	3.18505e-06	22.52	22.85	18.5	21.29	11.49	12.17	10.37	11.3433	7.59	9.59	8.77	8.65	3.62	4.81	3.28	3.90333	3.62883e-14	4.40972	3.88228	4.88265	5.05678	4.55786	3.85481	3.40072	3.68403	4.40112	4.18778	4.06226	3.93179	3.89463	3.91066	3.81879	3.89839	4.21247	4.67136	4.06772	4.07573	4.03485	4.16335
ENSDARG00000001220	mycbp2	ENSMUSG00000033004	Mycbp2	ortholog_one2one	85.5706	82.4694	100	52.79	1	1.33016e-09	4.38	4.42	3.98	4.26	3.38	3.97	3.38	3.57667	1.15	1.74	2.38	1.75667	2.93	2.26	2.08	2.42333	2.00954e-11	1.4232	1.46299	1.38859	1.5028	1.4444	4.72756	4.60773	4.44586	4.705	4.68132	4.37152	4.58983	1.73172	1.67172	1.88116	2.00149	1.57085	1.67292	1.75498	1.88363	1.81688	1.8506
ENSDARG00000001234	map4k2	ENSMUSG00000024948	Map4k2	ortholog_one2many	55.3757	58.3435	25	6.25	0	1.01045e-06	0.8	0.74	0.64	0.726667	11.13	10.94	11.5	11.19	0.17	0.38	0	0.183333	23.73	23.08	19.36	22.0567	6.61276e-09	1.13893	1.16048	1.30111	1.3721	1.24315	1.83338	1.4116	1.69309	1.84571	1.68149	1.5564	1.67028	1.15523	1.30032	1.39335	1.6829	1.14951	1.03018	1.28525	0.433438	0.475661	0.406271
ENSDARG00000001241	puf60b	ENSMUSG00000002524	Puf60	ortholog_one2many	78.9168	72.3404	25	43.01	0	0.00147438	92.97	105.52	89.55	96.0133	65.74	65.05	66.08	65.6233	13.93	19.63	32.67	22.0767	8.16	8.02	8.21	8.13	8.29686e-07	234.279	228.986	232.656	233.698	232.405	170.888	177.275	170.568	174.173	169.34	171.714	172.326	188.337	175.792	177.076	177.277	177.214	181.001	179.45	153.985	156.967	150.831
ENSDARG00000001244	srrm1	ENSMUSG00000028809	Srrm1	ortholog_one2one	56.6964	55.0379	25	75.78	1	5.47718e-05	74.19	82.4	79.94	78.8433	45.11	52.93	43.3	47.1133	8.01	7.25	10.28	8.51333	11.63	10.26	8.38	10.09	3.81531e-10	9.92591	9.73107	10.6758	10.5053	10.2095	10.8804	11.0679	10.5322	10.7137	10.7864	10.6559	10.7728	8.71005	8.93028	9.93574	9.69064	9.95071	10.0397	9.54286	11.7854	12.7766	12.7055
ENSDARG00000001249	pcgf1	ENSMUSG00000069678	Pcgf1	ortholog_one2one	68.1356	81.3765	0	27.56	0	0.0237408	23.18	21.14	23.13	22.4833	11.52	11.89	13.05	12.1533	5.71	8.09	1.69	5.16333	0.67	0.78	0.57	0.673333	1.04255e-13	31.476	31.7608	31.225	29.315	30.9442	17.6081	18.3318	18.4067	19.0619	15.2023	18.0343	17.7742	10.5043	9.08759	8.01335	9.67153	8.41749	8.17419	8.97807	11.8066	11.2028	10.3282
ENSDARG00000001259	gas2a	ENSMUSG00000030498	Gas2	ortholog_one2one	70.3593	74.8408	75	91.04	1	0.678236	0	0	0	0	0	0	0	0	0	0	0	0	0	0	0	0	0	75.9979	73.9645	73.6827	75.6268	74.818	36.7783	36.9696	38.387	37.8878	39.8233	39.0828	38.1548	64.0388	64.4081	63.0994	63.9866	63.6379	62.6485	63.6365	181.953	177.04	183.093
ENSDARG00000001303	psmb8a	ENSMUSG00000024338	Psmb8	ortholog_one2one	68.2657	67.029	25	22.11	0	2.64419e-07	0	0	0	0	0	0	0	0	0	0	0	0	0	0	0	0	5.15079e-10	0	0.131112	0.14366	0.21503	0.12245	0.221093	0.158745	0.241921	0.280213	0.220783	0.181761	0.21742	2.8746	3.86424	3.11838	2.68743	3.61814	3.44082	3.26727	2.54139	2.31085	2.46718
ENSDARG00000001313	g2e3	ENSMUSG00000035293	G2e3	ortholog_one2one	38.8102	37.0771	100	5.66	0	0.140406	0	0	0	0	0	0	0	0	0.08	1.53	2.48	1.36333	0.05	0.16	0.02	0.0766667	7.22178e-13	0.777016	0.864282	0.996838	1.29312	0.982815	0.76707	0.793091	0.743408	0.680526	0.97026	0.933303	0.81461	1.06856	0.979275	0.857605	1.07684	1.11885	1.11238	1.03558	1.8768	1.89159	1.8568
ENSDARG00000001414	mctp2a	ENSMUSG00000032776	Mctp2	ortholog_one2many	54.2899	41.7995	25	15.95	0	0.670165	0.43	0.43	0.48	0.446667	0	0	0.03	0.01	0	0	0.66	0.22	0.13	0.04	0.02	0.0633333	2.14248e-06	0.0802543	0.043566	0.0636472	0.0714503	0.0647294	0.10495	0.0843968	0.0229674	0.0310364	0.0326054	0.00805277	0.0473348	0.212261	0.215863	0.16006	0.22639	0.287492	0.207876	0.218324	0	0	0
ENSDARG00000001431	actn3b	ENSMUSG00000006457	Actn3	ortholog_one2many	83.9644	83.7778	0	0	0	0.000292272	0.02	0	0	0.00666667	2.87	2.53	2.82	2.74	0.62	0.35	0.79	0.586667	0.97	0.88	1.05	0.966667	0	0.716155	0.557793	0.848854	0.81316	0.73399	0.507627	0.510267	0.457427	0.430485	0.417459	0.343676	0.44449	5.62943	5.17811	4.92553	4.83093	5.16809	4.39889	5.02183	2.67723	1.74092	2.36836
ENSDARG00000001437	slc2a1a	ENSMUSG00000028645	Slc2a1	ortholog_one2many	75.2049	74.5935	0	1	0	0.550856	0	0	0	0	0	0	0	0	0.2	0	0	0.0666667	0.01	0.00954	0.01	0.00984667	7.34029e-09	11.4631	11.5106	11.7994	10.5996	11.3432	26.5706	26.2628	25.9451	26.7052	26.4759	25.9855	26.3242	23.7947	25.2258	22.1983	24.1622	24.0919	23.8306	23.8839	19.8041	19.2731	18.2165
ENSDARG00000001447	mier1b	ENSMUSG00000028522	Mier1	ortholog_one2many	54.5842	46.0432	0	8.56	0	0.00494912	1.23	1.17	1.05	1.15	0.92	0.9	1.33	1.05	0.17	1.6	0.13	0.633333	1.2	1.13	1	1.11	0.0759913	1.64912	1.42623	1.89255	1.55939	1.63182	1.8163	1.83269	1.85894	1.92232	1.81835	1.6056	1.80904	1.33939	1.44739	1.32211	1.48973	1.44465	1.3166	1.39331	2.06396	1.95004	2.26571
ENSDARG00000001452	adam8a	ENSMUSG00000025473	Adam8	ortholog_one2many	38.6714	39.4673	50	35.27	0	0.122979	0	0.01	0.02	0.01	0.3	0.31	0.3	0.303333	1.4	6.97	1.99	3.45333	0.43	0.97	0.22	0.54	1.46243e-12	7.3441	7.57974	6.90682	7.80116	7.40796	0.596229	0.655518	0.733946	0.537225	0.629504	0.729115	0.646923	0.222063	0.237866	0.179469	0.17863	0.255197	0.230656	0.217314	12.4861	11.7362	12.6285
ENSDARG00000001498	skap1	ENSMUSG00000057058	Skap1	ortholog_one2one	40.5836	43.0986	25	47.09	0	0.000161697	0	0.01	0	0.00333333	0.92	1.94	0.78	1.21333	2.74	4.66	3.3	3.56667	0.78	1.18	0.43	0.796667	0.007472	0.012076	0.0480732	0	0.0131404	0.0183224	0.0115808	0.011641	0.0253435	0.0642138	0.0809519	0.0399865	0.0389529	0	0	0	0	0	0	0	0	0	0
ENSDARG00000001549	sp3a	ENSMUSG00000027109	Sp3	ortholog_one2many	56.3945	46.7433	75	30.97	1	0.158528	11.38	14.56	12.01	12.65	9.37	10.42	9.58	9.79	0.32	0.39	1.08	0.596667	0.58	0.53	0.68	0.596667	5.84146e-12	5.71756	5.54482	5.73684	5.0289	5.50703	5.81595	5.81099	5.86547	5.7892	5.89818	6.79464	5.99574	6.03573	6.72788	6.98149	6.17208	6.67458	6.37575	6.49458	5.63814	5.74749	6.63136
ENSDARG00000001557	tomm34	ENSMUSG00000018322	Tomm34	ortholog_one2one	52.1311	51.4563	50	6.77	0	2.90151e-06	29.62	27.34	29.89	28.95	5.24	4.88	6.91	5.67667	3.35	5.38	5.07	4.6	1.21	1.07	1.3	1.19333	0	50.5985	48.3213	49.8751	50.1557	49.7377	19.7279	21.945	21.5241	21.6254	18.7445	20.4809	20.6746	22.4527	21.8346	23.1368	21.8023	20.4228	21.8883	21.9229	16.7949	17.288	17.9345
ENSDARG00000001558	kifc1	ENSMUSG00000024301	Kifc5b	ortholog_one2many	40.1294	36.9048	0	41.07	0	0.00470288	0	0	0	0	1.45	1.33	1.11	1.29667	2.71	1.2	1.88	1.93	0.18	0.51	0.13	0.273333	0.201814	0.171509	0.136552	0.149621	0.261277	0.17974	0.230267	0.231465	0.0359942	0.14592	0.0766481	0.113582	0.138979	0.0356413	0.0699926	0.118821	0.197108	0.122878	0.16289	0.117889	0	0	0
ENSDARG00000001559	csmd2	ENSMUSG00000028804	Csmd2	ortholog_one2one	71.4761	71.3376	0	44.37	0	0.0071614	3.22	2.25	2.73	2.73333	0.28	0.18	0.17	0.21	0.06	0.04	0.00621	0.0354033	0.00344	0	0	0.00114667	4.00145e-05	0	0	0	0	0	0	0	0	0	0	0	0	0	0	0	0	0	0	0	0	0	0
ENSDARG00000001572	prf1.3	ENSMUSG00000037202	Prf1	ortholog_one2many	35.8559	35.9206	0	28.62	0	1	0	0	0	0	0	0	0	0	0	0	0	0	0	0	0	0	8.83809e-07	0	0	0	0	0	0	0	0	0	0	0	0	0	0	0	0	0	0	0	0	0	0
ENSDARG00000001578	echs1	ENSMUSG00000025465	Echs1	ortholog_one2one	71.4777	71.7241	25	43.18	0	4.88417e-06	196.71	188.04	203.69	196.147	110.79	110.3	111.31	110.8	19.53	23.61	32.28	25.14	60.97	67.93	62.56	63.82	1.08742e-06	14.2496	13.4164	14.8122	15.0408	14.3798	6.68519	6.75291	7.02811	7.01392	7.38758	6.99651	6.97737	18.3922	17.763	18.012	18.2616	18.321	20.0407	18.4651	17.7984	17.982	17.0719
ENSDARG00000001621	nfyal	ENSMUSG00000023994	Nfya	ortholog_one2many	81.4493	80.9798	0	30.66	0	0.000293916	1.59	1.42	1.92	1.64333	2.07	1.85	2.68	2.2	0.7	0.69	0.32	0.57	0.54	0.27	0.37	0.393333	0.000846927	0.0862306	0.0980786	0.0537325	0.0804267	0.0796171	0.0236271	0.0356249	0	0.0262017	0.0137631	0.0135967	0.0188022	0.166396	0.138248	0.170686	0.283146	0.191224	0.160869	0.185095	0.217267	0.378139	0.511083
ENSDARG00000001634	kirrel1a	ENSMUSG00000041734	Kirrel	ortholog_one2many	58.9839	60.3295	0	0.91	0	0.0165685	1.11	1.04	0.75	0.966667	3.48	3.14	3.34	3.32	0.05	0.02	0	0.0233333	0.22	0.22	0.16	0.2	6.17829e-14	0.0362231	0.0480668	0.0921671	0.0394159	0.0539682	0.370536	0.279348	0.456123	0.295344	0.269804	0.279868	0.32517	1.45532	1.42898	1.29658	1.29052	1.11017	0.946075	1.25461	0.412608	0.503011	0.584438
ENSDARG00000001676	gpm6bb	ENSMUSG00000031342	Gpm6b	ortholog_one2many	81.3433	66.4634	75	31.4	1	0.146858	0.08	0.01	0.02	0.0366667	2.52	2.1	2.01	2.21	1.25	2.58	0.17	1.33333	1.42	2.34	2.11	1.95667	1.77959e-15	4.63428	4.53208	4.54468	4.14977	4.4652	7.91632	7.58522	7.51388	6.26335	7.58675	7.56605	7.40526	8.79451	9.22636	8.24947	9.28348	9.56874	9.34149	9.07734	16.3011	18.0113	17.302
ENSDARG00000001686	uckl1a	ENSMUSG00000089917	Uckl1	ortholog_one2many	73.3584	71.3504	25	46.06	0	2.68522e-05	0	0	0	0	0	0	0	0	0.18	0	0	0.06	0.04	0.05	0.02	0.0366667	2.49038e-06	22.0362	23.4615	21.2278	22.178	22.2259	13.5159	14.3368	13.4206	13.9122	13.354	13.8157	13.7259	8.79865	8.91746	8.02439	8.61328	8.69357	8.04243	8.51496	8.94825	8.49383	8.36806
ENSDARG00000001710	flot1a	ENSMUSG00000059714	Flot1	ortholog_one2many	78.1176	77.5701	0	97.71	1	7.25291e-08	11.46	9.67	11.47	10.8667	1.44	1.79	1.44	1.55667	0.45	0.63	0.02	0.366667	0.12	0.07	0.11	0.1	5.14262e-13	4.89023	3.9679	4.65333	5.1179	4.65734	5.04815	5.01436	4.24901	4.83635	4.94164	4.53809	4.77127	20.8749	20.2429	20.3563	21.4782	18.9314	20.486	20.395	9.88856	10.8589	8.687
ENSDARG00000001712	si:ch211-247n2.1	ENSMUSG00000037610	Kcnmb2	ortholog_many2many	47.8927	53.1915	0	42.62	0	0.0664412	0	0	0	0	0.29	0.2	0.47	0.32	0	0.03	0	0.01	0.22	0.23	0.1	0.183333	0.168832	0	0	0	0	0	0	0	0.0302291	0	0.0321858	0	0.0104025	0	0	0	0	0	0	0	0	0	0
ENSDARG00000001721	oc90	ENSMUSG00000015001	Oc90	ortholog_one2one	15.442	29.8969	100	0.64	0	2.0543e-05	0.32	0.5	0.54	0.453333	0.02	0.02	0.01	0.0166667	0.03	0.11	0.07	0.07	0.04	0.25	0.22	0.17	0.0034518	0	0	0	0	0	0	0	0	0	0	0	0	0	0	0	0	0	0	0	0	0	0
ENSDARG00000001729	strn3	ENSMUSG00000020954	Strn3	ortholog_one2one	80.5285	72.7387	100	99.03	1	3.61087e-08	11.56	11.19	12.05	11.6	4.19	3.68	3.62	3.83	3.02	3.34	2.9	3.08667	10.4	10.4	9.85	10.2167	6.08513e-11	32.8503	30.6043	30.135	28.8462	30.6089	27.3526	27.8495	28.2262	28.8373	29.8598	31.4813	28.9345	31.03	28.5918	29.61	31.884	30.6211	30.7524	30.4149	24.0219	24.6023	24.441
ENSDARG00000001733	gulp1a	ENSMUSG00000056870	Gulp1	ortholog_one2one	80	78.9474	25	58	0	1.0655e-05	7.71	7.05	7.19	7.31667	138.09	120.11	131.29	129.83	0.31	1.02	0.71	0.68	0.26	0.2	0.14	0.2	0	5.85074	6.15689	6.56309	6.20989	6.19515	5.97875	6.88821	6.76843	7.67579	6.69753	7.64872	6.94291	6.47785	6.67864	6.36798	6.47599	7.50167	7.77143	6.87893	12.6874	13.617	13.1815
ENSDARG00000001734	fkbp8	ENSMUSG00000019428	Fkbp8	ortholog_one2one	53.6946	54.0943	25	5.87	0	9.73487e-05	16.69	16.86	18	17.1833	11.53	12.07	11.79	11.7967	6.66	4.66	7.65	6.32333	10.42	8.92	9.73	9.69	0.00325386	36.7885	39.0682	38.7716	39.6414	38.5674	34.4023	34.6771	35.9938	33.4959	33.4331	33.512	34.2524	40.0444	39.0151	38.8713	38.9639	38.6069	39.1395	39.1068	34.5436	35.4235	32.8814
ENSDARG00000001754	noc2l	ENSMUSG00000095567	Noc2l	ortholog_one2one	55.3928	55.4667	75	21.01	1	0.0499967	5.24	5.19	4.73	5.05333	11.02	13.15	12.33	12.1667	6.47	12.07	25.35	14.63	2.04	1.98	2.47	2.16333	2.78882e-06	31.5247	32.3751	30.8123	28.7628	30.8687	26.0725	24.1175	28.1658	28.1114	25.8453	24.8042	26.1861	16.6555	17.1236	14.1899	16.5437	17.114	16.8658	16.4154	17.947	19.3994	17.3142
ENSDARG00000001760	tnxba	ENSMUSG00000033327	Tnxb	ortholog_one2many	19.8243	10.1088	25	0	0	0.161852	0	0	0	0	0.19	0.1	0.22	0.17	0	0	0	0	0.00455	0.00351	0.00402	0.00402667	6.84087e-07	0.0073807	0	0	0.00803125	0.00385299	0	0	0.00774484	0	0	0	0.00129081	0	0.00753012	0.00852218	0.0169647	0.0264396	0.00876224	0.0113698	0.0244079	0	0
ENSDARG00000001767	slc29a2	ENSMUSG00000024891	Slc29a2	ortholog_one2many	51.1111	50.4386	0	40.17	0	0.140427	0	0	0	0	1.59	1.57	1.51	1.55667	4.56	1.5	0.73	2.26333	0.04	0.33	0.07	0.146667	5.2396e-09	1.20294	1.66881	1.55027	1.2693	1.42283	1.46823	1.22989	1.41529	1.08548	1.14036	0.965629	1.21748	0.378761	0.446288	0.589265	0.460829	0.73997	0.822243	0.572893	2.00914	2.11804	2.26855
ENSDARG00000001769	ptpra	ENSMUSG00000027303	Ptpra	ortholog_one2one	73.6462	73.8239	0	77.75	1	7.04618e-06	1.81	1.67	1.67	1.71667	2.77	2.93	2.85	2.85	0.05	0.03	0	0.0266667	3.17	2.31	2.3	2.59333	1.06091e-09	85.3555	85.163	82.9419	83.8527	84.3283	104.762	106.218	110.321	110.89	104.3	109.272	107.627	117.185	116.139	117.213	112.504	114.247	118.077	115.894	124.232	123.73	121.38
ENSDARG00000001771	otol1a	ENSMUSG00000027788	Otol1	ortholog_one2many	40.2834	41.2863	0	59.69	0	2.25865e-13	103.45	99.22	103.55	102.073	0.57	0.44	0.16	0.39	0.35	0	0.83	0.393333	0.01	0.07	0	0.0266667	3.22726e-07	1.25096	0.788492	0.636597	1.08898	0.941258	0.0399889	0.0401969	0	0.0443464	0	0.138075	0.0437678	0.0433271	0	0	0.19169	0.199168	0.099008	0.0888655	4.64254	4.75429	5.19005
ENSDARG00000001776	stim2b	ENSMUSG00000039156	Stim2	ortholog_one2many	59.6974	58.1769	100	24.67	1	0.00553387	0.23	0.48	0.53	0.413333	0.13	0.09	0.11	0.11	1.44	0.47	1.13	1.01333	0.24	0.18	0.19	0.203333	0	5.723	5.9228	5.81961	6.05552	5.88023	6.83516	6.95533	7.51591	6.79585	7.06094	7.36309	7.08771	11.3275	10.4419	10.9662	11.1369	12.4727	11.817	11.3604	16.3521	18.1873	18.3299
ENSDARG00000001777	nup155	ENSMUSG00000022142	Nup155	ortholog_one2one	73.1129	73.1129	25	53.34	0	0.11844	0.77	0.67	0.68	0.706667	1.24	1.83	1.14	1.40333	0.49	0.12	0.05	0.22	2.02	1.39	1.84	1.75	3.43747e-15	1.33717	1.24673	1.05907	1.27124	1.22855	0.958377	1.16689	1.0782	1.2125	1.16372	0.978752	1.09307	1.55026	1.55092	1.62523	1.40734	1.27735	1.28668	1.44963	1.45848	1.15732	1.05439
ENSDARG00000001781	tspan11	ENSMUSG00000030351	Tspan11	ortholog_one2one	71.2598	71.5415	50	93.8	1	0.000817599	19.16	19.15	19.67	19.3267	8.46	9.62	8.03	8.70333	0.08	0.82	2.94	1.28	0.28	0.36	0.18	0.273333	6.58051e-15	0	0	0	0	0	0	0	0	0	0	0	0	0.105479	0.138093	0.0781429	0.0972219	0.101014	0.0602581	0.0967014	0	0	0
ENSDARG00000001785	irx2a	ENSMUSG00000001504	Irx2	ortholog_one2one	71.2963	64.9789	50	55.9	0	0.000472242	76.12	85.81	88.62	83.5167	9.62	10.13	8.94	9.56333	0.16	0.07	0	0.0766667	0.28	0.04	0.06	0.126667	0	8.73105	9.86432	8.02394	8.48483	8.77604	12.1646	10.9045	11.0633	10.687	11.6874	11.5461	11.3421	0.855848	0.896383	1.07788	1.00973	0.819625	0.391145	0.841769	1.72514	1.35451	1.86688
ENSDARG00000001788	atp5o	ENSMUSG00000022956	Atp5o	ortholog_one2one	61.244	60.0939	0	84.5	1	4.00358e-07	1710.76	1751.11	1636.39	1699.42	731.87	799.65	765.93	765.817	88.24	83.3	128.59	100.043	89.17	107.85	91.01	96.01	2.4303e-11	116.079	115.445	120.622	115.416	116.891	111.587	112.783	106.57	110.087	111.462	108.794	110.214	95.6607	92.1387	95.8949	94.8963	88.1665	88.2724	92.5049	92.8681	98.0891	91.0231
ENSDARG00000001803	kcnh6a	ENSMUSG00000001901	Kcnh6	ortholog_one2many	50.7576	63.4737	25	4.88	0	0.0809552	0	0	0	0	0.44	0.62	0.4	0.486667	0.26	0.04	0.45	0.25	0.08	0.16	0.08	0.106667	0	0.888669	0.657001	1.02444	0.718341	0.822113	0	0	0.0799296	0	0.0283678	0.0560495	0.0273911	0.0791461	0.0259045	0.0293174	0.0583605	0.0303185	0.0602864	0.0472222	0	0	0
ENSDARG00000001804	zgc:112148	ENSMUSG00000014177	Tvp23b	ortholog_one2many	67.4877	66.8293	0	0	0	2.40304e-06	26.82	24.02	23.45	24.7633	5.33	5.92	5.19	5.48	2.36	1.88	1.9	2.04667	16.52	16.04	14.41	15.6567	4.91154e-11	82.0877	82.137	78.6546	82.2158	81.2738	83.5161	83.1343	88.2106	85.0274	84.8211	87.489	85.3664	127.311	129.532	132.166	132.15	134.079	129.092	130.722	100.488	103.297	107.659
ENSDARG00000001807	tnfrsf21	ENSMUSG00000023915	Tnfrsf21	ortholog_one2one	53.5322	52.0611	75	13.51	1	5.80092e-06	14.97	15.5	14.75	15.0733	103.62	103.12	102.78	103.173	1.97	1.55	1.67	1.73	0.36	0.2	0.07	0.21	2.9086e-08	4.02592	4.60028	4.93214	4.97569	4.63351	15.4195	14.4696	17.0286	17.2319	15.7152	15.3057	15.8617	4.41553	4.05671	4.56247	4.22697	4.65892	4.42546	4.39101	5.50627	6.18451	6.21491
ENSDARG00000001817	SPIN4 (1 of many)	ENSMUSG00000071722	Spin4	ortholog_one2many	53.6965	55.4217	0	0	0	0.000230509	1.08	0.38	0.79	0.75	0.05	0	0	0.0166667	0.42	0.31	0.25	0.326667	1.13	0.55	0.64	0.773333	8.03504e-07	0.28072	0.214907	0.400306	0.610926	0.376715	0.269209	0.10408	0.0906367	0.13779	0.168881	0.262175	0.172129	0.538489	0.484681	0.324135	0.347436	0.283634	0.358901	0.389546	0.618891	0.449793	0.846123
ENSDARG00000001818	c3b.2	ENSMUSG00000024164	C3	ortholog_one2many	35.7185	36.3199	25	0	0	5.7711e-05	0	0	0	0	0	0	0	0	0.26	0.37	1.14	0.59	48.71	81.15	64.78	64.88	2.36895e-09	0	0	0	0	0	0.0840132	0.0506701	0.0735421	0.0186336	0.0391512	0.0580166	0.0540045	0.0546159	0.0536274	0.101154	0.080545	0.0627651	0.0624022	0.069185	0.038628	0	0.0201923
ENSDARG00000001825	cfap43	ENSMUSG00000044948	Cfap43	ortholog_one2one	37.6136	36.9203	50	62.75	0	9.6098e-07	6.85	5.23	5.96	6.01333	0.3	0.52	0.3	0.373333	0	0	0.02	0.00666667	0.07	0.05	0	0.04	0	0.235348	0.153146	0.187544	0.157595	0.183408	0.208336	0.200694	0.208965	0.336931	0.28317	0.339692	0.262965	1.29793	1.16362	0.919755	0.946663	1.17815	1.35402	1.14336	0	0	0
ENSDARG00000001829	zgc:112982	ENSMUSG00000044150	A830080D01Rik	ortholog_one2one	20.6642	7.44681	25	0	0	9.99816e-05	20.1	21.82	22.86	21.5933	15.11	14.09	17.54	15.58	12.16	14.21	8.1	11.49	6.25	5.61	6.07	5.97667	0	4.92288	4.16263	5.9737	5.81998	5.2198	4.61453	4.87046	4.56374	5.05833	5.29336	5.31106	4.95191	2.44218	2.75674	2.39337	2.67995	2.82868	2.32896	2.57164	3.24374	2.82022	3.22062
ENSDARG00000001835	nalcn	ENSMUSG00000038498	Catsper1	ortholog_one2one	3.42298	2.04082	0	0	0	0.597124	0.5	0.45	0.41	0.453333	0.16	0.3	0.45	0.303333	0.06	0.07	0.04	0.0566667	0.03	0.01	0.01	0.0166667	1	0	0	0	0	0	0	0	0	0	0	0	0	0	0	0	0	0	0	0	0	0	0
ENSDARG00000001857	aff4	ENSMUSG00000049470	Aff4	ortholog_one2one	62.5115	58.3621	50	80.86	1	0.00112005	2.84	2.78	2.21	2.61	2.34	3.55	4.01	3.3	0.76	0.4	0.67	0.61	7.93	3.62	5.18	5.57667	8.76218e-08	4.3816	4.43402	4.36158	4.29395	4.36779	3.90639	4.26254	4.26033	4.28931	4.07949	4.14847	4.15775	6.13293	6.32268	6.20416	6.05965	5.85602	6.33915	6.15243	7.79885	7.93248	8.53184
ENSDARG00000001870	atp1a1a.4	ENSMUSG00000033161	Atp1a1	ortholog_one2many	77.9081	77.9081	25	0.42	0	3.40664e-05	64.85	68.24	65.42	66.17	986.69	1080.57	999.69	1022.32	1.19	0.15	0.13	0.49	5.61	0.67	0.9	2.39333	0.00124763	47.3043	45.39	47.3677	45.8929	46.4887	17.461	17.5709	17.719	16.4686	16.8824	16.9613	17.1772	23.1615	22.0379	24.9641	23.4644	23.885	23.419	23.4886	28.073	29.7577	27.8037
ENSDARG00000001873	phgdh	ENSMUSG00000053398	Phgdh	ortholog_one2one	60.6061	60.0375	0	72.42	0	4.85914e-06	2.37	2.61	2.3	2.42667	3.3	3.61	4.15	3.68667	0.68	0.79	0.61	0.693333	0.13	0.07	0.02	0.0733333	6.12152e-11	24.467	27.6329	22.886	25.1642	25.0375	19.3967	17.1215	15.2143	16.6531	17.252	16.8834	17.0868	39.5836	40.2725	35.9938	34.6591	37.9155	41.2249	38.2749	17.5809	17.8821	17.2107
ENSDARG00000001879	nav2b	ENSMUSG00000052512	Nav2	ortholog_one2many	60.8599	56.4556	0	32.9	0	3.42575e-05	0	0	0	0	1.03	0.78	1.12	0.976667	0	0.06	0.02	0.0266667	14.08	13.91	18.09	15.36	0.0622832	0.107224	0.103155	0.0779497	0.04667	0.0837496	0.298199	0.303195	0.315039	0.273677	0.315465	0.232751	0.289721	0.137407	0.215143	0.198091	0.131443	0.123767	0.161239	0.161182	0.244272	0.180243	0.243023
ENSDARG00000001880	stx3a	ENSMUSG00000041488	Stx3	ortholog_one2many	63.5088	62.6298	0	10.61	0	8.60997e-06	20.29	20.74	21.35	20.7933	19.68	20.89	19.09	19.8867	1.39	3.47	2.57	2.47667	0.3	0.25	0.08	0.21	0	6.40607	6.17133	5.41988	5.25379	5.81277	4.17629	3.80255	3.42729	3.69168	3.59624	3.63984	3.72232	3.42648	3.36447	4.29963	3.49978	3.48557	3.87751	3.6589	6.48763	6.69432	6.12803
ENSDARG00000001881	cacnb3a	ENSMUSG00000003352	Cacnb3	ortholog_one2many	70.9677	63.6364	75	34.76	1	0.00923857	0	0	0	0	0	0	0	0	0	0	0.03	0.01	0	0	0	0	4.49967e-05	1.15527	1.29347	0.976334	0.911396	1.08412	1.38487	1.08582	1.18196	1.5665	1.19393	1.24325	1.27605	2.88092	2.38678	2.10096	2.42306	2.03475	2.12585	2.32538	1.81472	1.64648	1.83067
ENSDARG00000001882	kbtbd12	ENSMUSG00000033182	Kbtbd12	ortholog_one2one	55.2167	55.04	0	98.47	1	1	0	0	0	0	0	0	0	0	0	0	0	0	0.00903	0.03	0	0.01301	0.0200513	0	0	0	0	0	0	0	0	0	0	0	0	0	0	0	0	0	0	0	0	0	0
ENSDARG00000001888	ppm1ba	ENSMUSG00000061130	Ppm1b	ortholog_one2many	83.5079	66.8763	100	35.64	1	1.11198e-08	7.05	7.14	7.03	7.07333	5.02	6.28	5.15	5.48333	1.27	1.69	1.65	1.53667	2.08	2.33	1.75	2.05333	2.53426e-05	25.1789	25.1488	25.5789	25.3271	25.3084	24.8591	24.639	23.9293	24.4257	23.8984	24.95	24.4502	25.0697	25.6331	25.9124	24.4163	26.0613	27.2449	25.7229	30.0734	30.207	30.2711
ENSDARG00000001890	stt3b	ENSMUSG00000032437	Stt3b	ortholog_one2one	89.441	87.4848	50	100	1	0.00044435	14.95	15.96	15.81	15.5733	12.29	13.55	15.34	13.7267	3.22	8.6	20.33	10.7167	23.84	15.81	22.46	20.7033	8.60094e-10	26.6789	27.2783	27.2186	27.5578	27.1834	41.1171	40.0264	41.632	41.3485	41.7828	41.1591	41.1777	35.9565	36.1824	35.319	36.9313	36.8842	38.9916	36.7108	25.3598	26.3044	26.3893
ENSDARG00000001891	syt14b	ENSMUSG00000016200	Syt14	ortholog_one2many	76	66.2021	0	0	0	2.17717e-06	21.89	22.61	21.9	22.1333	0.2	0.2	0.2	0.2	0.21	0.95	0.31	0.49	0.06	0.07	0.02	0.05	1.10787e-14	6.06155	6.46654	6.52603	6.48419	6.38457	1.50039	1.26919	1.3098	1.182	1.13668	1.03801	1.23934	0.239849	0.200618	0.207305	0.225986	0.214384	0.182695	0.211806	0.631427	0.721702	0.610877
ENSDARG00000001897	man2b1	ENSMUSG00000005142	Man2b1	ortholog_one2one	55.6911	54.0967	0	40.05	0	0.0033441	8.99	9.35	8.02	8.78667	3.97	3.93	3.69	3.86333	5.86	9.13	11.54	8.84333	12.92	10.61	11.84	11.79	8.72844e-07	2.53281	2.66899	2.40747	2.37286	2.49553	5.33849	5.50988	5.11655	5.64654	5.6142	5.00812	5.3723	5.46045	4.58778	5.20784	5.37028	5.49889	5.12942	5.20911	3.21004	2.52429	2.8253
ENSDARG00000001898	manea	ENSMUSG00000040520	Manea	ortholog_one2one	58.2192	55.1948	50	9.66	0	3.69664e-06	28.45	24.85	21.88	25.06	8.75	8.24	10.4	9.13	2.2	4.06	2.05	2.77	11.31	14.74	9.99	12.0133	2.74319e-07	8.86854	9.50795	8.96423	8.38099	8.93043	5.43318	5.17587	5.03189	4.72567	4.77839	5.08845	5.03891	6.96404	6.85689	6.3493	6.34089	7.40623	6.0226	6.65666	7.0412	6.53585	7.68146
ENSDARG00000001909	vill	ENSMUSG00000038775	Vill	ortholog_one2one	45.4118	44.936	75	31.1	0	0.711779	0	0	0	0	0.03	0.07	0.08	0.06	0	0	0	0	0.1	0.01	0	0.0366667	0	11.1591	12.0008	12.9933	12.2762	12.1074	3.78278	3.92067	4.39649	3.7168	4.7039	4.28609	4.13446	13.4	14.0541	12.649	12.8012	13.325	13.3692	13.2664	21.5381	21.6668	20.751
ENSDARG00000001913	palmda	ENSMUSG00000033377	Palmd	ortholog_one2one	34.4681	29.4011	100	3	0	0.252353	0.3	0.34	0.35	0.33	0.04	0.05	0.01	0.0333333	0.01	0.04	0.01	0.02	0	0.00713	0.00545	0.00419333	3.87376e-07	0	0	0	0	0	0.0907254	0.136796	0.198544	0	0.0528489	0.0783148	0.0928716	0.491495	0.50673	0.327708	0.163088	0.395382	0.280783	0.360864	0.156428	0.155573	0.218056
ENSDARG00000001929	pink1	ENSMUSG00000028756	Pink1	ortholog_one2one	53.1359	52.5862	0	90.42	1	1.99807e-05	4.35	3.73	3.44	3.84	4.78	4.33	2.69	3.93333	0.23	0.04	1.2	0.49	11.83	10.91	15	12.58	1.40584e-05	52.354	53.5467	56.0244	51.6496	53.3937	122.301	121.768	123.812	119.925	112.655	115.832	119.382	88.3406	89.2181	86.2585	82.5231	86.507	86.9673	86.6358	84.2817	82.4533	82.5199
ENSDARG00000001930	klhl15	ENSMUSG00000043929	Klhl15	ortholog_one2one	78.8991	85.4305	50	37.15	0	0.00139583	11.09	10.87	13.47	11.81	1.24	0.87	1.69	1.26667	1.21	1.73	0.75	1.23	1.36	1.14	1.22	1.24	9.59772e-15	1.00833	1.21526	1.08946	0.976409	1.07236	0.487925	0.722318	0.873638	0.718179	0.733814	0.694309	0.705031	0.720895	0.830541	0.651564	0.733569	0.983105	0.933492	0.808861	1.60098	1.41982	1.32197
ENSDARG00000001933	prkag2b	ENSMUSG00000028944	Prkag2	ortholog_one2many	67.7298	63.7809	25	0	0	8.95408e-05	0	0	0	0	2.76	3.45	3	3.07	11.75	7.22	10.22	9.73	0.89	1.2	0.61	0.9	0.0209532	1.54357	1.45316	1.47092	1.42238	1.47251	1.48027	1.86332	1.89697	1.99651	1.95761	1.97999	1.86245	1.96507	1.816	2.28005	1.80592	1.85976	1.73344	1.91004	1.85481	1.92089	2.59623
ENSDARG00000001939	b3gat3	ENSMUSG00000071649	B3gat3	ortholog_one2one	59.3939	58.5075	0	83.22	1	0.00667139	7.71	8.25	8.7	8.22	3.75	4.07	4.07	3.96333	2.33	1.18	4.74	2.75	0.66	0.57	0.5	0.576667	3.14286e-13	46.7159	46.8289	47.628	45.3827	46.6389	38.9169	37.3831	36.4997	37.7105	41.0632	37.3363	38.1516	37.0192	35.373	31.1947	33.3775	34.2762	33.2093	34.075	37.4744	37.7631	35.2867
ENSDARG00000001940	dnajc1	ENSMUSG00000026740	Dnajc1	ortholog_one2one	58.7452	55.9783	25	45.47	0	1.90441e-06	56.55	53.76	58.12	56.1433	50.68	45.85	51.79	49.44	33.61	38.01	39.72	37.1133	16.66	11.21	14.51	14.1267	1.65904e-08	2.3976	2.5247	2.28559	2.34803	2.38898	3.56018	3.55633	3.50601	3.52864	3.60333	3.77317	3.58794	2.7966	2.69864	2.56301	2.5688	2.60435	2.92902	2.6934	3.24826	3.56966	3.11075
ENSDARG00000001950	ak1	ENSMUSG00000026817	Ak1	ortholog_one2one	75.7732	70	0	17.84	0	1.19648e-05	316.82	339.94	312.89	323.217	364.09	424.87	374.66	387.873	12.6	7.04	14.73	11.4567	3.64	2.56	2.43	2.87667	0	14.6304	14.0418	12.9603	15.6175	14.3125	99.4467	96.48	100.1	98.6785	96.9111	96.7748	98.0651	3.7553	3.75825	4.29351	4.553	3.98366	4.90953	4.20887	7.73816	8.7626	8.61071
ENSDARG00000001953	pfkfb3	ENSMUSG00000026773	Pfkfb3	ortholog_one2one	72.7612	70.2703	75	7.37	1	0.0311615	40.93	44.24	45.22	43.4633	4.59	3.99	4.61	4.39667	49.56	26.7	11.47	29.2433	0.47	0.9	0.18	0.516667	7.54651e-10	0.262193	0.189775	0.259922	0.350145	0.265509	0.251442	0.33317	0.15007	0.139421	0.292937	0.18416	0.2252	1.13926	1.00921	0.619247	0.657442	1.0104	0.735731	0.861881	0.748833	0.496492	0.521924
ENSDARG00000001968	dock5	ENSMUSG00000044447	Dock5	ortholog_one2one	70.5945	70.5567	50	2.59	0	0.00012875	0	0	0.01	0.00333333	0.3	0.31	0.47	0.36	0.09	0	0.41	0.166667	0.23	0.18	0.08	0.163333	3.49814e-13	1.04628	1.23219	1.13143	1.3662	1.19403	0.100338	0.13448	0.164685	0.111272	0.136379	0.0769887	0.12069	0.53451	0.41809	0.543644	0.581183	0.468507	0.476149	0.50368	2.46047	2.32275	2.58241
ENSDARG00000001969	txlng	ENSMUSG00000038344	Txlng	ortholog_one2one	58.6912	54.771	0	2.74	0	0.000649701	0.73	1.04	1.25	1.00667	0.77	0.9	1.05	0.906667	2.61	3.72	4.5	3.61	1.6	1.43	1.69	1.57333	0.681813	1.01571	1.20113	0.990321	1.14424	1.08785	1.56995	1.49748	1.51722	1.3852	1.50862	1.42443	1.48382	1.67617	1.47516	1.94545	1.64796	1.51248	1.65979	1.65284	1.73874	2.14844	1.77649
ENSDARG00000001971	cthrc1b	ENSMUSG00000054196	Cthrc1	ortholog_one2many	71.6738	68.1633	25	15.61	0	0.103502	0	0	0	0	0.84	0.9	0.5	0.746667	0	0	0	0	0.03	0.04	0	0.0233333	8.09928e-15	5.05352	6.18069	6.17466	6.29398	5.92571	2.74429	2.87595	1.98058	2.20156	2.58496	2.6881	2.51257	19.9912	20.6854	21.7937	22.4615	19.9206	22.4799	21.2221	13.6246	11.4809	11.9988
ENSDARG00000001975	hsd11b2	ENSMUSG00000031891	Hsd11b2	ortholog_one2one	42.029	45.0777	100	15.79	0	0.000470247	3.24	2.28	2.74	2.75333	36.31	33.09	37.74	35.7133	0	0.11	0	0.0366667	267.26	188.59	144.59	200.147	1.19273e-11	0	0	0	0	0	0	0	0	0	0	0	0	0.0507479	0	0	0	0	0	0.00845798	0	0	0
ENSDARG00000001993	myhb	ENSMUSG00000056328	Myh1	ortholog_many2many	83.2388	83.1102	25	0	0	0.139464	0	0	0	0	2.32	3.21	2.21	2.58	0.12	0.23	0.71	0.353333	0.03	0.04	0.02	0.03	5.36683e-06	0	0	0	0	0	0	0	0	0.0150846	0	0	0.00251411	0.0147379	0.0434135	0.0655107	0.0326022	0.0338739	0.033678	0.0373027	0.0312709	0.0466498	0.0653859
ENSDARG00000001994	stxbp1a	ENSMUSG00000026797	Stxbp1	ortholog_one2many	85.956	84.2454	25	17.47	0	0.00030907	0.18	0.21	0.16	0.183333	2.02	2.61	2.14	2.25667	1.51	2.66	2.6	2.25667	0.01	0.01	0.01	0.01	0	3.09286	2.62054	2.80297	2.91068	2.85676	2.4049	2.59871	2.82881	2.37804	2.87182	2.35271	2.5725	7.38268	7.50492	7.89042	8.23779	8.03509	7.81496	7.81098	1.26699	1.21424	0.915183
ENSDARG00000001999	adamts18	ENSMUSG00000053399	Adamts18	ortholog_one2one	63.8264	65.1354	0	41.21	0	1.32181e-07	0.02	0.09	0.07	0.06	0.04	0.06	0.04	0.0466667	0.01	0.01	0	0.00666667	0	0.00443	0.01	0.00481	1.14613e-07	0	0	0	0	0	0	0	0	0	0	0	0	0	0	0	0	0	0	0	0	0	0
ENSDARG00000002002	lmcd1	ENSMUSG00000057604	Lmcd1	ortholog_one2one	56.1404	52.6027	0	76.31	1	2.29244e-06	3.23	3.46	2.89	3.19333	24.83	29.96	23.53	26.1067	15.81	13.21	16.36	15.1267	0.66	0.58	0.58	0.606667	1.47123e-11	0.208349	0.155516	0.283998	0.226713	0.218644	0.899125	0.954014	0.92917	1.32947	0.523754	0.977351	0.935481	0.920062	0.690843	0.541287	0.538755	0.870754	0.680208	0.706985	1.20576	0.742343	1.44068
ENSDARG00000002006	rxrbb	ENSMUSG00000039656	Rxrb	ortholog_one2many	69.6682	56.1069	0	7.67	0	0.000210968	20.85	21.28	16.53	19.5533	11.44	13.55	10.47	11.82	7.99	5.64	7.34	6.99	8.07	5.7	5.49	6.42	1.80689e-09	8.28495	9.43369	8.7422	8.51141	8.74306	8.6229	7.75165	8.77041	8.39637	8.65748	8.44521	8.44067	12.2038	13.0519	11.2544	11.8739	11.406	11.6582	11.908	6.71525	5.55653	6.88022
ENSDARG00000002013	grb10a	ENSMUSG00000020176	Grb10	ortholog_one2many	62.7907	63.4228	0	0.46	0	2.19181e-05	6.97	6.65	7.29	6.97	41.14	41.83	41.65	41.54	0.48	0	0	0.16	5.06	8.23	3.63	5.64	0.0216488	0.188372	0.187472	0.183791	0.226551	0.196546	0.275725	0.219816	0.343313	0.179245	0.265844	0.284515	0.261409	0.329646	0.414715	0.538038	0.398793	0.295963	0.400182	0.396223	0.502725	0.695619	0.422755
ENSDARG00000002016	ppil2	ENSMUSG00000022771	Ppil2	ortholog_one2one	74.0952	74.6641	50	39.96	0	1.46761e-08	19.37	20.23	20.86	20.1533	12.79	15.26	11.32	13.1233	7.72	7.17	8.13	7.67333	3.04	3.05	3.17	3.08667	5.64248e-09	21.2318	21.6826	21.1941	20.7198	21.2071	21.7615	22.3533	20.5631	21.1823	20.018	20.4206	21.0498	28.8127	29.0808	28.3091	27.2873	27.9158	29.2105	28.436	21.2958	22.3159	21.0357
ENSDARG00000002020	rictorb	ENSMUSG00000050310	Rictor	ortholog_one2many	73.8399	74.5316	25	85.05	1	0.000143983	0.76	1.22	1.13	1.03667	0.39	0.32	0.33	0.346667	0.45	1.7	2.99	1.71333	1.08	1.11	0.8	0.996667	8.36837e-11	6.10676	6.2317	6.71201	5.99211	6.26064	7.52694	7.72469	8.23601	8.06925	8.65018	8.43876	8.10764	4.50501	4.8283	4.80511	5.14967	4.50694	4.43492	4.70499	4.14995	4.77445	4.77365
ENSDARG00000002021	pygb	ENSMUSG00000033059	Pygb	ortholog_one2one	86.4769	86.4769	75	95.15	1	5.3015e-06	12.77	15.69	14.47	14.31	9.9	10.53	9.13	9.85333	6.9	9.2	9.38	8.49333	1.92	3.69	2.08	2.56333	2.46939e-13	6.07111	5.94887	6.62036	5.34208	5.9956	6.70267	6.7556	5.85941	6.33703	6.82486	7.07325	6.59214	29.9639	29.7083	28.2782	29.115	28.058	29.5197	29.1072	14.7273	15.3452	15.2027
ENSDARG00000002026	qkib	ENSMUSG00000062078	Qk	ortholog_one2many	89.6552	83.871	25	69.25	0	0.000735704	0.44	0.45	1.57	0.82	0.02	0.41	0.43	0.286667	2.69	3.33	2.46	2.82667	0.02	0.06	0.00825	0.0294167	0	5.27221	5.07455	5.47068	4.8734	5.17271	3.64768	3.54355	3.28302	3.42433	3.5261	3.39285	3.46959	5.04211	4.94155	4.90799	4.57055	5.40235	5.2195	5.01401	10.1152	10.4099	10.5121
ENSDARG00000002031	tox4a	ENSMUSG00000016831	Tox4	ortholog_one2many	48.7329	40.3877	25	5.86	0	0.00385566	9.56	10.57	10.29	10.14	4.33	5.25	5.8	5.12667	1.2	1.1	5.11	2.47	1.53	1.2	1.65	1.46	4.65538e-09	13.8283	13.4392	13.9466	14.27	13.871	11.5802	11.678	12.712	12.5936	12.5484	11.8807	12.1655	13.5183	13.3134	12.9834	12.3407	12.9772	13.8578	13.1651	13.6975	13.5799	12.6145
ENSDARG00000002037	pfkfb2b	ENSMUSG00000101904	Gm29427	ortholog_many2many	53.4483	74.5989	25	8.09	0	0.000333531	19.99	16.54	17.38	17.97	0.78	1.32	0.85	0.983333	0.23	0.68	0	0.303333	0.15	0.16	0.07	0.126667	2.74053e-11	0.14161	0.0939556	0	0	0.0588913	0.633747	0.910062	0.742981	0.803207	0.791073	0.833608	0.78578	0.0490465	0.0481588	0	0	0	0.0560388	0.0255407	0	0	0
ENSDARG00000002060	brf2	ENSMUSG00000031487	Brf2	ortholog_one2many	32.0158	19.2857	25	27.76	0	2.52679e-05	9.61	7.11	5.35	7.35667	2.9	3.35	2.9	3.05	0.8	0.93	0.71	0.813333	0.35	0.48	0.31	0.38	5.04495e-15	4.18012	4.60688	4.06881	4.30434	4.29004	3.73967	4.13774	4.1214	3.61014	3.16575	3.65388	3.7381	1.83645	2.11806	2.72104	2.1602	1.84247	2.43132	2.18492	3.86566	3.47544	3.13617
ENSDARG00000002071	adss	ENSMUSG00000015961	Adss	ortholog_one2one	83.0769	82.8947	75	78.48	1	0.000263795	3.3	2.94	2.96	3.06667	0.45	0.74	0.61	0.6	0.91	2.17	2.49	1.85667	1.06	0.93	0.5	0.83	9.53752e-10	8.90967	8.45148	8.17596	8.91593	8.61326	8.39175	7.74523	8.09711	8.24867	8.73232	8.47307	8.28136	13.3491	14.6699	14.7196	14.5593	14.7947	15.6772	14.6283	13.8333	14.1719	13.6831
ENSDARG00000002077	mnat1	ENSMUSG00000021103	Mnat1	ortholog_one2one	73.1392	73.1392	100	77.16	1	7.94944e-06	14.51	12.65	14.12	13.76	14.25	13.17	11.79	13.07	2.61	4.54	2.38	3.17667	0.64	1.07	0.95	0.886667	0	4.33403	4.67971	4.5984	4.58858	4.55018	4.62169	4.40376	4.4425	4.80498	4.35614	5.15307	4.63036	6.85054	6.19731	6.45345	6.76943	5.95448	6.3571	6.43038	5.40469	4.98989	5.38048
ENSDARG00000002084	lamb2	ENSMUSG00000052911	Lamb2	ortholog_one2one	60.0449	59.4775	25	7.15	0	0.000245328	0.58	0.64	0.63	0.616667	1.26	1.07	1.06	1.13	0.02	0.04	0	0.02	0.08	0.09	0.16	0.11	0	5.45229	5.2788	5.20237	5.82002	5.43837	11.1963	11.2831	10.5253	11.3606	10.7265	9.73012	10.8037	9.3753	10.3091	8.84454	9.16075	9.58885	9.79724	9.51263	22.816	21.473	21.9753
ENSDARG00000002127	stam	ENSMUSG00000026718	Stam	ortholog_one2one	74.4186	70.073	50	74.75	1	5.00524e-08	34.29	28.11	30.13	30.8433	9.82	10.66	15.48	11.9867	6.59	7.53	6.91	7.01	6.43	6.39	6.09	6.30333	2.71004e-06	5.44792	4.96206	5.03854	4.91086	5.08985	3.0193	3.11788	3.1797	3.43974	3.74568	3.33272	3.30584	3.27135	3.31081	3.28793	3.00087	3.11792	3.12541	3.18571	4.19312	3.81678	4.37142
ENSDARG00000002128	cwf19l1	ENSMUSG00000025200	Cwf19l1	ortholog_one2one	66.5441	67.4115	0	49.19	0	0.0082386	7.48	7.65	7.41	7.51333	3.7	4.14	5.76	4.53333	2.4	4.92	8.35	5.22333	1.46	1.8	1.55	1.60333	9.24298e-06	3.35332	3.3624	3.98662	3.73119	3.60838	4.85999	4.78805	5.89987	5.2287	4.5916	5.39877	5.12783	1.93861	2.00642	1.77585	2.05731	2.43862	2.15513	2.06199	2.80709	3.09579	3.45776
ENSDARG00000002131	celf2	ENSMUSG00000002107	Celf2	ortholog_one2one	88.3459	89.3536	75	17.46	1	0.000983448	2.61	2.07	2.22	2.3	4.34	5.5	6.35	5.39667	9.67	10.3	16.48	12.15	0.41	0.42	0.21	0.346667	0	2.13406	2.19316	1.89056	2.03047	2.06206	2.18677	2.21493	2.3051	2.34732	2.35318	2.35931	2.29443	2.35847	2.50403	2.41185	2.45659	2.46927	2.42193	2.43702	4.37101	4.39672	4.1445
ENSDARG00000002165	psme1	ENSMUSG00000022216	Psme1	ortholog_one2one	58.4677	58.2329	0	59.75	0	2.94234e-06	7.25	4.83	5.44	5.84	102.58	105.07	105.99	104.547	39.63	43.7	32.21	38.5133	17.78	20	18.82	18.8667	1.77814e-10	5.99652	5.92729	7.38421	6.43629	6.43608	10.0538	10.1848	9.97362	9.76114	10.209	10.6259	10.1347	34.4595	34.3769	32.3117	34.7859	33.415	32.7375	33.6811	17.4472	18.1567	17.5354
ENSDARG00000002167	cacnb1	ENSMUSG00000020882	Cacnb1	ortholog_one2one	73.6318	74.3719	75	100	1	9.38349e-06	0.7	0.81	1.21	0.906667	3.15	4.29	2.88	3.44	0.19	0	0	0.0633333	0.05	0.1	0.05	0.0666667	2.55846e-05	0.179068	0.316823	0.282054	0.108251	0.221549	0.267128	0.268518	0.125268	0.148119	0.200065	0.307449	0.219424	0.744242	0.994662	0.574339	0.640252	0.546436	0.614138	0.685678	0.197392	0.327187	0.252228
ENSDARG00000002172	aplnra	ENSMUSG00000044338	Aplnr	ortholog_one2many	48.6188	46.6843	0	0	0	0.119723	0	0	0	0	2.54	2.23	2.08	2.28333	1.11	0.23	0.47	0.603333	0.32	0.09	0.21	0.206667	0.677077	0	0	0	0	0	0	0	0	0	0.0272174	0	0.00453624	0	0	0	0.027997	0.0581781	0	0.0143625	0	0	0
ENSDARG00000002174	itfg2	ENSMUSG00000001518	Itfg2	ortholog_one2one	68.8073	67.7201	50	92.96	1	0.00153261	26.56	25.74	26.33	26.21	3.24	2.98	3.44	3.22	4.74	2.8	8.05	5.19667	1.42	1.64	1.52	1.52667	3.55816e-08	3.56115	3.07506	3.65489	3.70408	3.4988	3.09705	3.3824	3.77348	3.65731	3.23759	3.0443	3.36535	4.00856	4.22097	3.54753	4.31336	3.75205	3.8547	3.94953	3.406	2.98548	3.19876
ENSDARG00000002184	igbp1	ENSMUSG00000031221	Igbp1	ortholog_one2many	47.6056	49.7059	50	50.98	0	2.18352e-06	19.3	16.73	16.4	17.4767	17.1	20.99	19.28	19.1233	9.16	8.2	6.83	8.06333	2.67	2.61	2.83	2.70333	1	3.53067	3.38832	3.62665	3.75612	3.57544	3.08358	2.70457	2.66287	3.03406	2.62391	2.78355	2.81543	3.86507	3.24837	4.47711	4.18446	3.53837	3.76117	3.84576	4.06571	4.31996	4.05079
ENSDARG00000002190	chmp2bb	ENSMUSG00000004843	Chmp2b	ortholog_one2many	82.7103	83.0986	25	23.76	0	0.00137809	40.74	44.3	43.41	42.8167	37.23	39.69	38.93	38.6167	18.78	26.21	10.92	18.6367	7.02	7.64	6.25	6.97	2.66821e-14	57.2141	56.7945	58.8083	57.029	57.4615	38.2242	38.3758	38.9442	41.2946	39.9861	42.6952	39.92	107.078	111.493	108.689	108.688	112.635	112.74	110.221	83.8755	78.472	83.2262
ENSDARG00000002192	aspn	ENSMUSG00000021388	Aspn	ortholog_one2one	54.5946	54.1555	100	21.09	1	0.711779	0	0	0	0	0.35	0.8	1.09	0.746667	0.05	0	0	0.0166667	0.06	0	0	0.02	0.00269716	0	0	0	0	0	0.0736709	0.111081	0.161222	0.0816988	0.128743	0.254373	0.135132	0	0	0.0887019	0	0.0458654	0.0456002	0.0300279	0	0.0421094	0
ENSDARG00000002193	rho	ENSMUSG00000030324	Rho	ortholog_one2many	70.9859	72.4138	0	55.91	0	0.679758	0	0	0	0	0	0	0	0	1.8	0.19	0	0.663333	0.1	0.03	0.03	0.0533333	4.71836e-05	0.0745582	0.0296808	0.0325214	0	0.0341901	0	0.0143746	0	0	0.0166601	0	0.00517245	0.139445	0.030427	0.0688713	0.102824	0.106835	0.12392	0.095387	0	0	0
ENSDARG00000002194	rhd	ENSMUSG00000028825	Rhd	ortholog_one2one	33.8061	34.2105	100	0	0	0.000101713	1.3	2.11	3.12	2.17667	15.95	14.86	19.03	16.6133	0.99	0.21	0.54	0.58	0.23	0.4	1.01	0.546667	0	0.226125	0.225046	0.0616458	0.184543	0.17434	0.32528	0.108991	0.237282	0.180363	0.12632	0.374378	0.225435	3.28938	3.3452	3.39427	3.89815	3.71268	3.28854	3.48803	7.04173	8.3047	7.2968
ENSDARG00000002196	bach1b	ENSMUSG00000025612	Bach1	ortholog_one2many	46.9136	10.2842	75	4.73	0	0.00113035	6.34	5.75	4.54	5.54333	3.01	5.06	2.87	3.64667	5.06	7.77	5.55	6.12667	5.74	10.56	7.49	7.93	0.00702876	0.175001	0.203193	0.206736	0.222164	0.201774	0.265723	0.126524	0.214241	0.294679	0.228108	0.128771	0.209674	0.0757645	0.104151	0.0673555	0.117321	0.0696555	0.0519395	0.0810311	0.64303	0.495622	0.52101
ENSDARG00000002197	pygl	ENSMUSG00000021069	Pygl	ortholog_one2one	65.285	74.1176	50	22.92	0	5.71457e-08	0	0	0	0	0.04	0.07	0	0.0366667	1.42	0.09	0	0.503333	208.05	228.26	253.79	230.033	9.72579e-08	1.01222	1.66336	1.12946	0.922134	1.18179	2.12202	1.95152	1.95141	1.55215	2.15662	2.57224	2.05099	13.0368	12.7768	12.6118	12.7692	13.0987	11.961	12.709	4.04801	4.02587	3.55388
ENSDARG00000002210	stk25a	ENSMUSG00000026277	Stk25	ortholog_one2many	82.5472	82.1596	75	0.6	1	0.00241222	14.53	19.08	16.74	16.7833	7.56	6.77	8.54	7.62333	0.36	0.18	0	0.18	0.4	0.29	0.1	0.263333	4.56355e-08	21.2409	21.6641	21.2859	21.5947	21.4464	16.8312	17.113	17.7009	17.2308	15.3822	16.1716	16.7383	25.4856	25.7362	24.2574	24.7498	25.1413	25.6954	25.1776	20.8166	19.36	20.3875
ENSDARG00000002213	invs	ENSMUSG00000028344	Invs	ortholog_one2one	51.9493	50.1883	75	53.62	1	0.00583433	0	0.04	0.01	0.0166667	2.73	3.41	4.01	3.38333	0.05	0.21	1.32	0.526667	2.69	1.99	2.37	2.35	5.98412e-09	1.08786	0.972828	1.05733	0.952143	1.01754	1.23225	1.36784	1.1498	1.224	1.33872	1.24423	1.25947	0.950141	0.812305	0.846505	0.896904	0.771868	0.767405	0.840855	0.234622	0.285192	0.290716
ENSDARG00000002215	rtca	ENSMUSG00000000339	Rtca	ortholog_one2one	71.0744	70.4918	100	89.67	1	0.000222327	52.69	52.18	49.28	51.3833	9.51	10.06	11.57	10.38	9.11	11.59	14.98	11.8933	3.53	3.75	3.85	3.71	5.04615e-10	22.5757	23.6127	24.0954	22.5315	23.2038	22.3394	21.0695	22.0297	22.7857	21.8491	21.0559	21.8549	29.9815	28.5097	29.0558	26.7165	30.6203	30.5571	29.2401	20.9231	22.0173	20.3832
ENSDARG00000002216	tbx3a	ENSMUSG00000018604	Tbx3	ortholog_one2one	73.5849	68.4211	25	60.66	0	0.000684165	9.03	9.19	9.97	9.39667	1.31	0.93	1.21	1.15	0	0	0	0	0.25	0	0.02	0.09	5.24052e-05	0	0.0167159	0	0.0182765	0.0087481	0.0966441	0.14572	0.105748	0.0357251	0.131359	0.166848	0.113674	0.506107	0.496947	0.581812	0.366758	0.40112	0.51844	0.478531	0.518415	0.497166	0.464563
ENSDARG00000002217	scocb	ENSMUSG00000063253	Scoc	ortholog_one2many	93.75	60	25	0	0	8.72824e-07	39.19	39.83	40.64	39.8867	3.62	3.77	4.76	4.05	9.64	7.26	2.28	6.39333	1.25	1.21	0.93	1.13	1.2879e-06	39.287	41.4479	41.507	43.3205	41.3906	29.1685	30.1207	33.4296	31.8358	33.3963	32.896	31.8078	22.2496	24.1207	23.06	22.6005	23.7952	25.9923	23.6364	20.6179	21.08	21.4044
ENSDARG00000002220	zgc:103692	ENSMUSG00000026851	BC005624	ortholog_one2one	76.4706	76.4706	25	39.29	0	0.0212245	0	0	0	0	0	0	0	0	0	0	0	0	0	0	0	0	1.53164e-13	32.7477	30.0211	29.3891	30.014	30.543	31.036	32.2567	31.4805	30.9119	33.3647	31.1115	31.6935	34.2548	35.6249	36.7972	33.9414	35.5278	38.6165	35.7938	32.3132	30.2992	28.9068
ENSDARG00000002230	sypb	ENSMUSG00000031144	Syp	ortholog_one2many	67.6768	64.0127	25	44.63	0	2.71463e-05	1.07	1.1	1.41	1.19333	2.56	1.99	2.48	2.34333	1.1	1.57	1.42	1.36333	0.01	0.02	0	0.01	6.87595e-10	10.4965	15.5749	10.1262	15.2791	12.8692	10.5802	16.2862	10.7422	10.4274	10.8193	10.1159	11.4952	3.82712	2.41703	3.2546	2.56368	4.21233	3.40786	3.28044	6.17608	4.32236	3.44769
ENSDARG00000002231	plpp2a	ENSMUSG00000052151	Plpp2	ortholog_one2many	64.1115	66.6667	25	0	0	0.00276542	0	0	0	0	0	0	0	0	0	0	0	0	0	0	0	0	0	33.415	33.0374	28.0752	28.7902	30.8295	53.0578	52.8586	55.3545	54.1207	57.2238	52.9042	54.2533	91.41	93.5001	90.3219	87.1925	90.8552	91.8907	90.8617	84.2963	86.8981	85.6676
ENSDARG00000002235	mmp14a	ENSMUSG00000000957	Mmp14	ortholog_one2many	67.77	66.8385	0	0	0	0.000599309	5.45	5.53	5.92	5.63333	42.63	40.55	41.44	41.54	0.1	0.08	0.41	0.196667	0.95	0.78	0.54	0.756667	0	21.455	20.8501	20.7965	19.5009	20.6506	27.4605	27.1978	28.576	27.2316	28.2636	25.4144	27.3573	50.0641	47.4412	45.9194	48.9601	47.5879	46.1807	47.6923	56.7611	55.2823	54.1386
ENSDARG00000002240	psmb6	ENSMUSG00000018286	Psmb6	ortholog_one2one	73.7069	71.8487	0	13.4	0	0.000257407	99.17	97.41	80.59	92.39	79.54	99.58	93.17	90.7633	12.88	13.36	18.44	14.8933	16.23	15.48	19.12	16.9433	1.98787e-10	158.513	160.199	162.355	164.261	161.332	143.288	141.481	131.985	134.381	131.762	129.744	135.44	153.999	156.909	159.295	161.648	148.87	146.238	154.493	169.851	163.434	161.488
ENSDARG00000002241	kcna2a	ENSMUSG00000040724	Kcna2	ortholog_one2many	89.4523	88.3768	25	0	0	2.9815e-05	0.5	1	0.97	0.823333	0.14	0.46	0.5	0.366667	0.06	0	0	0.02	0	0	0	0	1.83967e-11	0.136234	0.143115	0.115546	0.13177	0.131666	1.14679	1.29868	1.31836	1.05443	1.30223	1.23636	1.22614	0.495437	0.517358	0.384519	0.347928	0.469949	0.440276	0.442578	0.408808	0.340193	0.340174
ENSDARG00000002249	tbxas1	ENSMUSG00000029925	Tbxas1	ortholog_one2one	46.8864	48.03	0	51.26	0	2.72783e-05	29.83	33.54	33.3	32.2233	20.81	19.72	19.78	20.1033	10.35	15.71	8.1	11.3867	11.17	11.6	12.87	11.88	2.76842e-08	0.0198177	0.0986152	0.0972476	0.0862578	0.0754846	0.0475126	0.0286559	0.0415908	0.0526901	0.0664244	0.0328106	0.0449474	0.185324	0.222408	0.125854	0.182205	0.272136	0.235272	0.203867	0	0	0.0114195
ENSDARG00000002255	epb41l3a	ENSMUSG00000024044	Epb41l3	ortholog_one2many	58.9588	52.422	25	39.99	0	0.000434236	6.99	6.36	5.42	6.25667	5.08	6	4.89	5.32333	0.33	0.02	0.1	0.15	0.05	0.03	0.08	0.0533333	0	8.06245	6.51945	5.92495	6.57982	6.77167	6.05101	6.2092	5.74743	5.66189	6.58453	6.09382	6.05798	25.2229	25.0123	24.2347	25.6321	28.1493	27.6484	25.9833	19.4172	19.0708	19.5175
ENSDARG00000002264	mrpl41	ENSMUSG00000036850	Mrpl41	ortholog_one2one	64.4444	64.4444	50	89.79	1	0.000694303	45.56	41.25	47.35	44.72	37.51	35.47	33	35.3267	10.14	13.45	18.14	13.91	4.71	3.74	4.81	4.42	9.43092e-10	59.1607	55.5454	54.5539	56.0937	56.3384	50.8959	52.1388	46.6395	47.4847	46.9374	48.8339	48.8217	47.6584	48.2453	57.1792	53.1798	43.2582	46.5018	49.3371	40.6053	41.7182	41.7502
ENSDARG00000002267	dcaf13	ENSMUSG00000022300	Dcaf13	ortholog_one2one	75.2809	75.2809	50	64.53	0	3.53055e-06	37.55	36.91	34.57	36.3433	23.32	24.68	22.93	23.6433	2.49	1.51	2.41	2.13667	2.53	3.02	3.41	2.98667	4.20568e-09	32.7095	33.8254	35.7955	34.6443	34.2437	22.0636	23.8026	24.6299	23.6029	21.8102	23.7267	23.2726	23.3622	23.1765	21.0644	22.969	23.4487	24.8995	23.1534	29.6523	29.8723	26.3808
ENSDARG00000002271	zfand5b	ENSMUSG00000024750	Zfand5	ortholog_one2many	65.8878	66.1972	0	82.31	1	4.39123e-05	39.6	36.38	35.39	37.1233	16.91	18.48	17.88	17.7567	20.71	21.03	12.03	17.9233	19.09	21.85	16.34	19.0933	2.60888e-11	24.0519	23.7922	22.515	24.3669	23.6815	16.9818	16.8457	17.5891	17.0218	17.0532	18.0675	17.2599	20.8637	20.4861	20.8666	21.6553	21.0405	20.7979	20.9517	19.3114	19.812	20.1896
ENSDARG00000002285	mcoln1a	ENSMUSG00000004567	Mcoln1	ortholog_one2many	60.746	58.9655	0	73.36	0	6.99329e-06	6.65	5.65	7.18	6.49333	0.58	0.74	0.59	0.636667	5.51	8.63	7.18	7.10667	1.9	1.54	1.28	1.57333	0.000101627	24.7857	24.9289	24.2229	24.8863	24.7059	29.8377	32.0745	30.8359	30.3933	29.9787	31.2949	30.7358	15.8228	15.364	13.9409	14.4368	15.3138	15.0692	14.9913	23.7205	25.1552	22.0076
ENSDARG00000002298	ankrd22	ENSMUSG00000024774	Ankrd22	ortholog_one2one	51.3089	51.3089	75	24.03	1	6.52023e-05	38.37	32.36	36.48	35.7367	15.79	12.74	15.79	14.7733	15.72	9.66	9.84	11.74	0.74	0.71	0.18	0.543333	0	6.53442	6.77607	5.68054	4.92257	5.9784	91.2363	90.3013	85.3983	90.73	90.4666	87.7587	89.3152	4.46308	4.66203	3.00745	3.72861	4.14687	4.28564	4.04895	8.05939	7.86503	8.37323
ENSDARG00000002300	p2rx2	ENSMUSG00000029503	P2rx2	ortholog_one2one	50.5	40.6439	25	75.32	1	0.00613198	13.59	10.44	9.09	11.04	1.83	2.75	2.22	2.26667	0	0	0	0	0	0	0	0	1.19598e-12	101.174	100.969	102.692	103.501	102.084	291.209	289.855	292.744	286.865	287.442	289.144	289.543	227.381	231.338	215.573	218.749	226.362	222.767	223.695	279.55	277.637	272.332
ENSDARG00000002304	gins2	ENSMUSG00000031821	Gins2	ortholog_one2one	76.9231	75.6757	50	100	1	0.00644627	0	0	0	0	0.62	0.36	0.56	0.513333	6.13	5.45	12.48	8.02	0.05	0.2	0.09	0.113333	6.74779e-06	1.91351	1.26958	1.8228	0.837656	1.46089	4.57707	3.03192	3.99275	3.8595	4.05461	4.12696	3.94047	2.35389	2.73764	2.97133	2.80577	2.07479	2.82002	2.62724	1.33348	2.7006	3.52332
ENSDARG00000002305	me3	ENSMUSG00000030621	Me3	ortholog_one2one	75.1244	75	0	29.96	0	2.22734e-07	25.57	23.56	21.43	23.52	34.79	33.84	35.39	34.6733	4.94	5.74	4.92	5.2	0.67	0.88	0.53	0.693333	0	4.13461	4.12099	3.74266	4.09004	4.02207	1.14638	1.22956	1.37723	1.25164	1.17723	1.1698	1.22531	9.52688	10.0334	9.34889	9.8717	9.26346	9.94142	9.66429	6.09278	5.85005	5.92957
ENSDARG00000002311	fabp11b	ENSMUSG00000103124	Gm37389	ortholog_many2many	25.3731	35.7895	75	21.09	0	0.550856	0	0	0	0	0	0	0	0	0	0.16	0	0.0533333	0	0	0	0	1	0	0	0	0	0	0	0	0	0	0	0	0	0	0	0	0	0	0	0	0	0	0
ENSDARG00000002330	lhx8a	ENSMUSG00000096225	Lhx8	ortholog_one2many	72.2892	65.3951	75	35.82	1	1	0.07	0.06	0	0.0433333	1.52	2.04	1.96	1.84	0	0	0	0	0.03	0	0	0.01	0.00325386	0	0	0	0	0	0	0	0	0	0	0	0	0	0	0	0	0	0	0	0	0	0
ENSDARG00000002332	frmd6	ENSMUSG00000048285	Frmd6	ortholog_one2one	70.7792	70.0965	50	96.58	1	2.47202e-06	3.71	3.5	4.07	3.76	5.09	3.91	4.33	4.44333	0.94	0.43	0.02	0.463333	0.67	0.96	0.63	0.753333	1.30759e-10	2.0304	2.0207	1.96105	1.8727	1.97121	5.21092	5.62948	4.78871	4.72994	5.14188	4.58881	5.01496	4.98287	5.1097	4.93443	4.75579	4.68731	4.88977	4.89332	1.06579	1.12356	0.668557
ENSDARG00000002333	fam102bb	ENSMUSG00000040339	Fam102b	ortholog_one2many	68.8385	65.6757	25	100	1	0.000343785	14.71	17	15.08	15.5967	1.39	1.33	1.19	1.30333	1.47	1.68	0.6	1.25	1.38	1.14	1.24	1.25333	3.77124e-12	3.7296	4.18363	4.32552	4.04114	4.06997	3.50089	3.53434	3.31662	3.12607	3.30176	3.55837	3.38967	6.00991	5.28845	4.30641	4.68584	5.41587	5.98492	5.2819	9.25031	8.16021	9.27029
ENSDARG00000002339	sgf29	ENSMUSG00000030714	Sgf29	ortholog_one2one	90.785	90.785	25	85.99	1	0.0955622	0	0	0	0	0	0	0	0	0	0	0	0	0	0	0	0	4.32116e-09	10.4013	12.6409	10.7424	9.57682	10.8404	10.5502	12.0031	12.0688	11.2744	10.0007	10.0453	10.9904	11.5349	12.2444	12.4718	10.9767	11.6438	10.0329	11.4841	10.6388	10.3065	10.3734
ENSDARG00000002344	tubb4b	ENSMUSG00000062591	Tubb4a	ortholog_one2many	97.7528	97.973	0	0	0	0.306968	0	0	0	0	0	0	0	0	0	0	0	0	0	0	0	0	6.81083e-12	0.849341	1.08679	0.617454	0.572126	0.781429	0.465436	0.779762	0.848804	0.860257	0.632622	0.53569	0.687095	3.06776	3.54867	4.10959	3.53259	3.5255	3.121	3.48419	2.18459	2.08396	2.75004
ENSDARG00000002347	cyp11a1	ENSMUSG00000032323	Cyp11a1	ortholog_one2many	44.5972	43.1559	75	53.87	0	0.306968	0	0	0	0	0.47	0.14	0.19	0.266667	0.04	0	0	0.0133333	0	0	0	0	6.48048e-07	0	0	0	0	0	0.179883	0.162737	0.157463	0.159588	0.188613	0.144925	0.165535	0	0	0	0	0	0	0	0	0	0
ENSDARG00000002353	tagapa	ENSMUSG00000052031	Tagap1	ortholog_many2many	15.2838	20.7921	25	0	0	0.00166853	151.56	151.92	144.84	149.44	2.53	2.92	2.81	2.75333	68.28	36.55	31.43	45.42	0.4	1.04	0.34	0.593333	7.63594e-07	17.77	17.0005	16.3356	16.1759	16.8205	19.0203	17.351	17.7244	19.386	17.1211	17.125	17.9546	16.3991	16.1023	15.3115	15.5034	15.8799	16.1057	15.8837	14.1542	14.1187	13.6968
ENSDARG00000002355	shpk	ENSMUSG00000005951	Shpk	ortholog_one2one	55.7692	54.8319	25	83.28	1	0.00506932	0	0	0	0	0.73	0.93	0.71	0.79	0.72	0.39	1.06	0.723333	1.9	1.7	1.3	1.63333	0.00367742	2.86785	3.33486	3.02855	2.95639	3.04691	2.57656	2.44446	2.7876	3.371	2.73194	2.79887	2.78507	4.29725	3.75749	5.43765	5.20406	4.00122	3.79889	4.41609	1.96335	1.75404	1.39161
ENSDARG00000002365	cers5	ENSMUSG00000023021	Cers5	ortholog_one2one	64.5995	60.3865	25	71.69	0	5.09414e-05	37.73	41.62	39.94	39.7633	3.78	4.37	3.61	3.92	8.65	12.9	17.26	12.9367	1.02	0.93	0.77	0.906667	9.15523e-08	111.278	110.442	110.193	108.629	110.135	40.4511	41.4953	41.5921	42.6945	39.1112	40.1265	40.9118	15.3054	15.859	15.2458	15.0868	16.86	17.0948	15.9086	42.5148	42.2823	43.0408
ENSDARG00000002377	mief2	ENSMUSG00000018599	Mief2	ortholog_one2one	26.8382	16.0793	25	18.05	0	2.05882e-05	2.26	2.41	2.07	2.24667	0.27	0.39	0.27	0.31	2.53	1.57	0.85	1.65	6.46	6.59	6.13	6.39333	0.0129159	2.48834	2.24532	2.31548	2.67156	2.43018	1.59087	1.59914	1.77555	2.0465	1.96461	1.68452	1.77687	4.68838	4.97588	4.55878	4.68997	4.51636	4.56902	4.6664	3.511	4.292	3.90008
ENSDARG00000002385	atm	ENSMUSG00000034218	Atm	ortholog_one2one	52.9602	53.392	0	57.75	0	0.0616837	0.27	0.43	0.38	0.36	0.32	0.34	0.3	0.32	0.3	0.71	1.38	0.796667	0.52	0.62	0.46	0.533333	0.00834113	0.418391	0.30362	0.313667	0.379391	0.353767	0.568416	0.537763	0.512205	0.574737	0.496667	0.413694	0.517247	0.271706	0.222324	0.181162	0.290507	0.145715	0.196613	0.218004	0.61494	0.439571	0.52236
ENSDARG00000002391	tlcd1	ENSMUSG00000019437	Tlcd1	ortholog_one2one	27.8884	28.3401	25	2.27	0	0.119794	0	0	0	0	2.31	1.91	1.91	2.04333	0.67	0.83	0	0.5	0.12	0.13	0.16	0.136667	0.02827	3.05827	3.06157	2.8249	2.97547	2.98005	2.8121	2.65331	2.88824	3.38638	2.6933	2.93872	2.89534	3.645	4.16636	3.94669	3.22529	3.84517	3.63072	3.74321	6.46481	7.13945	6.73807
ENSDARG00000002401	gale	ENSMUSG00000028671	Gale	ortholog_one2one	72	72.6225	0	52.24	0	0.00367349	7.6	6.82	7.56	7.32667	9.83	8.7	9.3	9.27667	3.83	4.76	7.74	5.44333	2.28	2.08	2.42	2.26	0.000474329	3.72611	3.44343	3.69006	4.75787	3.90437	4.04733	3.5919	4.18922	3.72009	4.16302	4.11268	3.97071	5.72841	5.70231	5.61943	5.68055	6.12913	5.59717	5.74283	3.98166	4.75186	6.04691
ENSDARG00000002402	ercc3	ENSMUSG00000024382	Ercc3	ortholog_one2one	87.468	87.3563	0	52.52	0	0.00380542	10.06	10.15	10.23	10.1467	8.56	10.06	10.39	9.67	1.01	3.16	6.38	3.51667	3.5	3.23	3.7	3.47667	4.79498e-07	11.252	10.439	12.2699	12.1746	11.5339	7.13274	6.986	6.90414	7.70718	7.20899	5.12209	6.84353	7.00159	6.4533	7.74391	6.68487	8.57766	7.8111	7.37874	5.92138	4.94815	5.86097
ENSDARG00000002403	nusap1	ENSMUSG00000027306	Nusap1	ortholog_one2one	34.8214	36.534	75	9.31	0	0.00297211	0	0	0	0	2.6	3.07	2.82	2.83	3	2.78	1.42	2.4	0.17	0.52	0.08	0.256667	0.00282575	0.421806	0.419791	0.363131	0.338199	0.385732	0.276769	0.192606	0.186365	0.330539	0.471266	0.294042	0.291931	0.922688	0.905989	0.794646	0.433736	0.954327	0.474404	0.747632	0.562857	0.559779	0.639623
ENSDARG00000002406	zmynd10	ENSMUSG00000010044	Zmynd10	ortholog_one2one	54.0179	55	0	82.37	1	4.38937e-05	22.2	21.49	20.13	21.2733	0.27	0.4	0.64	0.436667	0	0	0	0	0.03	0.01	0	0.0133333	0.000160187	0	0	0	0	0	0.12177	0.204005	0.48855	0.315091	0.803905	0.513884	0.407867	0	0	0.0977429	0.0486429	0.0505403	0.0502481	0.0411957	0	0	0
ENSDARG00000002411	pde4cb	ENSMUSG00000031842	Pde4c	ortholog_one2many	57.1429	60.6414	25	5.91	0	0.0044219	0	0	0	0	0	0	0	0	0	0.16	0.48	0.213333	0.85	1.09	0.79	0.91	0.00325386	0.0162509	0	0	0	0.00406271	0.155845	0.125324	0.136421	0.0172827	0.0363128	0.0896842	0.0934783	0	0	0	0	0	0	0	0.250793	0.534475	0.280926
ENSDARG00000002445	prdm1a	ENSMUSG00000038151	Prdm1	ortholog_one2one	57.2165	53.949	50	33.79	0	0.0599766	0.47	0.32	0.39	0.393333	0.03	0.01	0.01	0.0166667	0.1	0.19	0.02	0.103333	0.14	0.09	0.07	0.1	0.00556019	0	0	0	0	0	0	0	0	0	0	0	0	0	0	0	0	0	0	0	0	0	0
ENSDARG00000002463	arhgef37	ENSMUSG00000045094	Arhgef37	ortholog_one2one	35.543	37.2781	50	14.23	0	0.420341	2.93	2.14	2.08	2.38333	0.95	1.34	1.15	1.14667	1.56	0.12	0.14	0.606667	0.05	0.08	0.05	0.06	0	1.95045	1.9966	1.67115	1.91013	1.88208	1.25589	1.6116	1.16953	1.48164	1.02732	0.891878	1.23964	8.22228	8.84102	7.81803	9.35057	8.38444	7.74053	8.39281	5.49797	4.76532	4.81675
ENSDARG00000002467	rdh14b	ENSMUSG00000020621	Rdh14	ortholog_one2many	67.1827	64.9701	0	0	0	4.69408e-05	16.24	15.74	15.85	15.9433	5.19	5.77	5.72	5.56	2.59	3.51	6.09	4.06333	3.11	3.75	4.36	3.74	6.30065e-05	57.054	55.8676	58.6109	57.3534	57.2215	58.5891	59.1299	59.6119	57.6168	57.9988	59.257	58.7006	39.3092	40.0968	37.4627	36.4432	37.8648	37.7185	38.1492	31.6486	31.4084	33.6522
ENSDARG00000002479	ercc6l	ENSMUSG00000051220	Ercc6l	ortholog_one2one	36.5955	42.8226	0	32.09	0	0.00160244	0	0	0	0	0.15	0.26	0.31	0.24	0.73	0.53	0.41	0.556667	0.05	0.22	0.02	0.0966667	1.03897e-09	0.288926	0.236803	0.259466	0.166443	0.23791	0.065195	0.0491506	0.0713366	0.126524	0.0759541	0.0937946	0.0803258	0.123615	0.0866986	0.156993	0.136727	0.0202943	0.0403539	0.0941137	0	0	0
ENSDARG00000002483	wnt7ab	ENSMUSG00000030093	Wnt7a	ortholog_one2many	81.1429	81.3754	0	48.93	0	7.61378e-13	0.47	0.25	0.18	0.3	0.19	0.15	0.15	0.163333	0.08	0.13	0.04	0.0833333	0.13	0.02	0.03	0.06	0	3.03968	3.16653	2.97392	3.12214	3.07557	16.237	14.6784	16.8127	16.7677	15.9332	16.6812	16.185	14.0799	14.6366	14.3016	13.5164	14.0437	12.8158	13.899	8.70564	8.72032	8.7414
ENSDARG00000002487	noc3l	ENSMUSG00000024999	Noc3l	ortholog_one2one	65.75	65.1797	75	54.78	1	6.5288e-05	3.51	3.26	3.01	3.26	11.27	11.67	9.26	10.7333	2.58	4.38	3.76	3.57333	1.83	2.15	2.58	2.18667	0.0038843	0.815689	0.766694	1.33423	1.08483	1.00036	1.19509	1.59446	1.92585	1.95183	1.34169	1.65058	1.60992	1.22423	1.08649	1.02033	0.624958	0.784614	0.699379	0.906665	1.34874	1.14264	1.12283
ENSDARG00000002494	itgb6	ENSMUSG00000026971	Itgb6	ortholog_one2one	58.5678	58.1957	100	27.26	1	2.94982e-06	4.15	4.74	4.58	4.49	1.51	0.9	1.18	1.19667	0.03	0.09	0.33	0.15	0.52	0.03	0.02	0.19	0	0.443522	0.416181	0.442192	0.303358	0.401313	0.644079	0.647429	0.837727	0.781647	0.651266	0.727311	0.71491	1.07969	0.892073	0.731594	1.00488	0.98355	0.85751	0.924882	1.87182	2.3756	2.16139
ENSDARG00000002506	zgc:92818	ENSMUSG00000036934	4921524J17Rik	ortholog_one2one	59.2965	76.6234	100	100	1	0.00167429	0	0	0	0	0	0	0	0	0	0	0	0	0	0	0	0	6.61587e-07	9.92885	11.1099	10.2419	10.6288	10.4774	8.5438	9.72645	9.1234	10.5022	10.5534	9.35953	9.6348	7.30524	7.50156	7.62229	7.46328	6.53677	7.13612	7.26088	8.2826	8.17846	7.48407
ENSDARG00000002507	itga10	ENSMUSG00000090210	Itga10	ortholog_one2one	52.9813	53.3448	50	4.25	0	0.0856079	0.64	0.7	0.69	0.676667	3.01	3.12	3.15	3.09333	1.34	0.04	0.92	0.766667	0.07	0.00334	0	0.0244467	0.000131217	0.0868791	0.0691713	0.0757912	0.113444	0.0863215	0.0666533	0.1005	0.109398	0.110875	0.271786	0.153428	0.13544	0.12638	0.124093	0.0802525	0.0798772	0.186734	0.185654	0.130499	0.670386	0.495277	0.620772
ENSDARG00000002508	ankrd33ab	ENSMUSG00000047034	Ankrd33	ortholog_one2many	27.9221	38.2789	0	5.32	0	0.711779	0	0	0	0	0.3	0.19	0.19	0.226667	0.08	0	0	0.0266667	0	0	0	0	0.00325386	0	0	0	0	0	0	0	0	0	0	0	0	0	0	0	0	0	0	0	0	0	0
ENSDARG00000002523	hsdl2	ENSMUSG00000028383	Hsdl2	ortholog_one2one	70.3614	59.5918	100	80.79	1	4.37322e-07	12.24	13.87	13.64	13.25	41.55	40.8	43.55	41.9667	10.39	13.54	15.08	13.0033	87.3	78.95	77.45	81.2333	0.000925352	35.6898	37.1557	35.86	36.45	36.2888	31.4437	33.2855	32.7143	31.9557	32.4544	33.2719	32.5209	40.0983	41.2804	39.497	38.3119	38.2665	39.7293	39.5306	25.7304	25.519	26.4174
ENSDARG00000002533	adora2b	ENSMUSG00000018500	Adora2b	ortholog_one2one	58.1197	61.4458	50	31.69	0	2.21366e-05	0	0	0	0	0	0	0	0	1.74	2.68	2.17	2.19667	0	0.03	0	0.01	5.14262e-10	0	0	0	0	0	0	0	0	0	0	0	0	0.202991	0.348806	0.281971	0.280652	0.2916	0.347896	0.292319	0.107677	0.26772	0.281434
ENSDARG00000002536	tm9sf4	ENSMUSG00000068040	Tm9sf4	ortholog_one2one	83.1029	84.1369	75	96.29	1	0.0117377	32.78	33.26	29.3	31.78	19.69	20.92	23.56	21.39	14.54	24.92	36.42	25.2933	20.27	17.19	19.76	19.0733	6.88205e-12	8.31679	8.09232	7.53069	7.50115	7.86024	6.00556	5.94135	6.16872	6.02821	5.97343	6.01048	6.02129	10.9948	11.4272	10.1318	10.312	10.9211	11.1665	10.8256	9.30427	10.7052	9.88428
ENSDARG00000002538	smu1a	ENSMUSG00000028409	Smu1	ortholog_one2many	95.7115	95.7115	0	78.02	1	0.000131164	35.26	32.49	31.92	33.2233	36.47	40.51	34.35	37.11	8.79	12.15	19.48	13.4733	5.12	4.81	4.95	4.96	1.83444e-05	54.7195	59.0012	53.4006	56.5561	55.9193	42.2798	44.2822	39.6538	41.0492	42.4142	43.3044	42.1639	52.9538	49.4016	49.4383	48.4434	53.4034	52.6145	51.0425	42.771	42.8539	41.5197
ENSDARG00000002546	rundc3ab	ENSMUSG00000006575	Rundc3a	ortholog_one2many	72.8774	69.2825	0	0	0	0.0293213	0	0	0	0	0.64	0.97	0.8	0.803333	1.18	0.4	1.28	0.953333	0.00807	0	0	0.00269	3.43747e-15	32.0796	34.2744	29.8365	31.2731	31.8659	21.8611	21.0297	21.5092	21.832	19.1701	19.7499	20.8587	1.68731	1.68803	1.41513	0.915532	1.68297	1.63686	1.50431	10.4364	10.7825	10.2401
ENSDARG00000002549	eif3eb	ENSMUSG00000022336	Eif3e	ortholog_one2many	93.722	93.9326	50	72.46	0	0.0533397	11.31	9.06	10.66	10.3433	4.97	6.46	6.47	5.96667	7.86	1.6	2.29	3.91667	1.37	3.01	1.5	1.96	5.7214e-07	30.8167	31.1351	30.8627	30.0333	30.7119	23.5527	26.3246	25.6487	25.4973	23.5197	25.6233	25.0277	61.3059	58.4663	58.0667	61.0209	61.0271	61.4378	60.2208	29.0067	29.2328	26.6867
ENSDARG00000002552	mapkapk2a	ENSMUSG00000016528	Mapkapk2	ortholog_one2many	82.9843	82.1244	100	56.02	1	6.95615e-06	36.09	37.49	38.81	37.4633	22.97	20.86	23.49	22.44	48.4	64.78	61.21	58.13	8.45	8.02	8.17	8.21333	4.39103e-08	5.86714	5.39676	5.36393	5.48146	5.52732	5.17189	5.97004	6.49864	7.34266	6.12472	5.7236	6.13859	28.6647	28.4482	26.7902	27.5844	26.1128	27.4041	27.5008	9.99526	10.6228	11.2352
ENSDARG00000002564	syngr1a	ENSMUSG00000022415	Syngr1	ortholog_one2many	65.0224	61.9658	0	5.75	0	0.000346513	0	0	0	0	2.42	3.08	1.97	2.49	1.12	0.65	1.11	0.96	0	0.03	0.03	0.02	1.77959e-15	8.52756	8.44953	7.60274	8.36147	8.23532	5.94918	6.61247	6.11629	5.50121	6.23998	6.66099	6.18002	4.53738	4.09196	4.02513	4.15708	4.56541	4.58351	4.32674	10.6398	10.787	11.3396
ENSDARG00000002571	tmod2	ENSMUSG00000058587	Tmod3	ortholog_one2many	73.2558	71.5909	25	81.2	1	5.49682e-05	0.94	1.55	1.8	1.43	2.23	3.25	2.29	2.59	6.04	3.82	4.61	4.82333	1.56	1.47	1.14	1.39	8.29611e-11	29.718	30.704	30.0447	28.8022	29.8172	17.5827	17.2614	16.6756	16.4989	18.7398	18.124	17.4804	33.4168	33.403	30.2139	31.0566	32.8695	31.4237	32.0639	23.5143	24.3797	24.8158
ENSDARG00000002582	tbx15	ENSMUSG00000027868	Tbx15	ortholog_one2one	77.9032	80.2326	100	74.48	1	0.00221973	0	0.01	0	0.00333333	3.3	3.96	3.11	3.45667	0	0	0	0	0.0095	0	0	0.00316667	2.20989e-08	0.0961953	0.11967	0.104898	0.235517	0.13907	0.0922508	0.139096	0.0757059	0.0767275	0.0268688	0.0530877	0.0772895	0.12494	0.147214	0.222145	0.0829149	0.229731	0.142752	0.158283	0.503685	1.02823	0.388014
ENSDARG00000002587	dpysl3	ENSMUSG00000024501	Dpysl3	ortholog_one2one	79.3651	65.8858	25	57.13	0	1.6764e-11	30.57	33.7	32.57	32.28	2.03	1.94	1.39	1.78667	0.81	0.78	0.31	0.633333	0.1	0.11	0.06	0.09	0.00025258	0.100683	0.229033	0.125476	0.187812	0.160751	0.220695	0.194113	0.226393	0.168262	0.0964187	0.0952528	0.166856	0.418457	0.440233	0.631093	0.562022	0.377846	0.324435	0.459014	1.14156	1.26147	1.19348
ENSDARG00000002589	mylpfb	ENSMUSG00000030672	Mylpf	ortholog_one2many	82.3529	82.8402	0	99.01	1	0.00833154	0.71	1.05	0.91	0.89	0	0	0	0	0	0.24	0	0.08	0	0	0	0	5.04495e-15	0.678802	0.760005	1.48043	1.10795	1.0068	2.84798	3.76253	2.9382	3.69975	2.46479	2.43499	3.02471	1.41062	2.07763	0.881757	1.9503	1.72242	1.00733	1.50834	4.48958	6.32546	6.25833
ENSDARG00000002591	ruvbl1	ENSMUSG00000030079	Ruvbl1	ortholog_one2one	92.3246	92.3246	25	100	1	0.00127837	28.71	26.8	24.79	26.7667	19.38	22.63	19.55	20.52	6.17	13.66	14.59	11.4733	1.58	1.68	1.54	1.6	1.16292e-10	47.0247	45.5723	45.2249	44.767	45.6472	35.1307	34.9932	36.548	34.5684	34.2483	34.6721	35.0268	56.3061	52.0434	55.722	54.6434	58.1348	60.39	56.2066	30.9661	32.6695	26.5775
ENSDARG00000002593	slc45a2	ENSMUSG00000022243	Slc45a2	ortholog_one2one	58.1227	60.7547	50	79.15	1	0.62086	0	0	0	0	0	0	0	0	0	0.06	0	0.02	0	0.04	0.02	0.02	1.05476e-13	0	0	0	0	0	0.289695	0.203841	0.22189	0.385515	0.101251	0.200053	0.233708	1.09857	1.51017	1.25568	1.31925	1.11821	0.932428	1.20572	1.69827	2.15262	1.87994
ENSDARG00000002597	pabpc1l	ENSMUSG00000054582	Pabpc1l	ortholog_one2one	61.7742	63.0972	0	70.2	0	0.27933	0	0.01	0.02	0.01	0.71	1.3	0.72	0.91	1.09	0.25	0.03	0.456667	0	0	0	0	7.12472e-05	0	0	0.0721464	0.0359962	0.0270356	0	0	0	0	0	0	0	0.274977	0.236251	0.343769	0.190089	0.316007	0.117817	0.246485	0.911637	0.326395	0.571856
ENSDARG00000002600	pcsk1	ENSMUSG00000021587	Pcsk1	ortholog_one2one	71.6556	71.8459	75	94.17	1	0.0353652	0.05	0.09	0.17	0.103333	1.11	1.35	1.1	1.18667	0	0	0.1	0.0333333	0.04	0	0	0.0133333	0.000169145	0.250231	0.304377	0.27287	0.393303	0.305195	0.0533267	0.107208	0.0291752	0.0591377	0.0931909	0.092064	0.0723505	0	0	0	0	0	0	0	0	0	0
ENSDARG00000002609	rnf145a	ENSMUSG00000019189	Rnf145	ortholog_one2many	81.6641	79.9397	50	88.89	1	1.77812e-06	12.85	12.58	13.25	12.8933	4.43	5.01	5.21	4.88333	3.18	4.01	2.19	3.12667	0.08	0.14	0.03	0.0833333	1.29566e-06	10.6823	10.6658	11.2827	11.3846	11.0039	10.4441	9.40503	10.8329	10.7575	9.69791	10.5643	10.2836	13.709	13.3073	13.8044	13.5004	13.6262	13.0803	13.5046	12.1454	12.6499	11.7641
ENSDARG00000002613	rpa3	ENSMUSG00000012483	Rpa3	ortholog_one2one	52.8926	52.8926	100	0	1	1.00528e-05	7.07	3.58	3.49	4.71333	8.89	8.38	9.19	8.82	15.97	15.39	19.92	17.0933	1.28	1.73	0.98	1.33	2.545e-08	11.6605	11.7627	12.9749	12.8609	12.3147	9.28059	9.40533	8.82308	9.27957	8.86243	8.40506	9.00934	9.97289	9.06404	9.34228	9.7544	10.1349	8.66372	9.4887	7.95705	7.13088	7.13049
ENSDARG00000002632	anxa11b	ENSMUSG00000021866	Anxa11	ortholog_one2many	60.6186	58.4493	25	46.79	0	0.00071663	8.1	8	8.1	8.06667	95.56	86.48	90.16	90.7333	10.46	16.39	19.87	15.5733	23.75	21.53	17.47	20.9167	5.32546e-05	0.806314	0.650646	0.855497	1.16194	0.868599	0.815048	0.924324	0.983299	0.857511	0.973903	0.697542	0.875271	4.61922	4.42445	3.14532	3.80683	4.50178	4.26878	4.12773	2.42625	2.79523	2.38589
ENSDARG00000002634	b4galt1	ENSMUSG00000028413	B4galt1	ortholog_one2many	55.2198	50.3759	0	1.82	0	0.0370097	0	0	0	0	4.32	3.54	4.1	3.98667	20.6	16.33	2.8	13.2433	1.98	2.61	1.74	2.11	0.0804921	2.44751	2.20283	1.62457	2.10743	2.09559	4.02077	4.22633	4.15389	4.20994	3.92342	3.64107	4.02923	4.02471	3.9953	3.41582	3.39984	4.42193	3.6889	3.82442	3.28448	3.70983	3.45837
ENSDARG00000002635	FAM184A (1 of many)	ENSMUSG00000019856	Fam184a	ortholog_one2many	50.4241	46.8066	0	83.42	1	0.0986849	2.45	2.2	1.94	2.19667	1.11	1.13	0.9	1.04667	0.02	0.16	0	0.06	0.1	0.27	0.19	0.186667	0	3.02233	3.11091	2.2348	2.25255	2.65515	1.09186	0.97781	1.15128	1.49704	1.48021	1.43946	1.27294	0.473204	0.823679	0.812683	0.594766	0.395499	0.491515	0.598558	0.730214	0.544666	0.882706
ENSDARG00000002642	sh3gl1b	ENSMUSG00000003200	Sh3gl1	ortholog_one2many	76.6382	73.0978	50	3.45	0	1.12293e-05	40.98	40.58	38.01	39.8567	17.34	17.99	16.41	17.2467	5.38	4.67	2.15	4.06667	2.84	3.13	1.89	2.62	7.56735e-08	65.1913	65.0964	62.8373	63.697	64.2055	122.2	121.955	123.307	125.156	118.85	118.757	121.704	35.1112	32.5234	35.5026	34.6369	32.5605	31.7527	33.6812	44.2488	47.2489	45.6094
ENSDARG00000002644	rgs5a	ENSMUSG00000026678	Rgs5	ortholog_one2one	69.7802	70.1657	25	42.34	0	1.54304e-05	1.19	1.13	1.31	1.21	19.2	20.25	20.98	20.1433	0.11	0.33	0.1	0.18	3.83	3	2.71	3.18	0.00534459	0.0396441	0	0	0	0.00991102	0	0	0.0208	0	0	0	0.00346666	0.0617882	0.141563	0.183101	0.250587	0.142015	0.0941295	0.145531	0.50256	0.565004	0.479725
ENSDARG00000002656	stxbp5a	ENSMUSG00000019790	Stxbp5	ortholog_one2many	79.3345	81.1828	100	100	1	1.04515e-06	0.81	1.12	1.39	1.10667	3.1	2.86	3.03	2.99667	0.3	0.07	0.11	0.16	0.03	0.05	0.00263	0.0275433	0	1.17618	1.12876	1.1299	1.16558	1.15011	2.21562	2.28789	2.01294	2.43472	2.40136	2.10959	2.24369	0.581958	0.578568	0.606289	0.748283	0.518314	0.540252	0.595611	0.748598	0.667751	0.903667
ENSDARG00000002659	mapre1b	ENSMUSG00000027479	Mapre1	ortholog_one2many	68.3824	69.403	0	10.14	0	4.56998e-05	67.47	64.82	62.38	64.89	76.03	81.15	78.83	78.67	6.04	13.85	12.16	10.6833	4.82	3.53	4.18	4.17667	7.90249e-13	27.3759	27.8767	26.4308	25.8472	26.8827	19.7924	20.0065	19.0663	19.25	19.5915	20.1314	19.6397	18.6157	18.7143	17.6765	18.5351	18.5418	18.955	18.5064	31.0293	30.5055	30.2866
ENSDARG00000002663	optn	ENSMUSG00000026672	Optn	ortholog_one2one	41.1992	36.4726	50	56.43	0	7.24937e-06	39.66	38.39	40.97	39.6733	7.95	6.83	8.51	7.76333	5.91	9.03	6.81	7.25	15.46	14.81	14.39	14.8867	9.59772e-15	1.87281	2.29399	1.57096	1.43697	1.79368	2.41771	2.17569	2.29274	2.09387	2.87036	2.12011	2.32841	24.0748	22.9532	22.2067	22.7376	24.1406	27.9346	24.0079	2.40853	2.84284	2.79477
ENSDARG00000002666	kcnj1b	ENSMUSG00000041248	Kcnj1	ortholog_one2many	57.0667	54.5918	0	89.89	1	0.325109	0	0	0	0	0	0	0	0	0	0.45	0.21	0.22	0.1	0.1	0.03	0.0766667	1	0	0	0	0	0	0	0	0	0	0	0	0	0	0	0	0	0	0	0	0	0	0
ENSDARG00000002670	ATG14	ENSMUSG00000037526	Atg14	ortholog_one2one	59.5745	62.6016	25	76.06	1	4.21214e-06	0.5	0.41	0.17	0.36	1.92	1.41	1.49	1.60667	0.38	1.11	0.64	0.71	4.86	4.84	5.22	4.97333	7.56973e-08	10.2126	11.5415	10.3675	9.80536	10.4817	9.46818	9.11458	10.4698	9.61105	10.3012	9.34057	9.71755	9.96004	9.16688	9.25871	8.82518	8.91991	9.14741	9.21302	5.78717	5.69825	5.77943
ENSDARG00000002682	tbcela	ENSMUSG00000037287	Tbcel	ortholog_one2many	63.5514	64.1509	0	45.29	0	0.000476828	4.29	6.44	3.84	4.85667	3.27	3.62	3.67	3.52	0.98	1.62	0.84	1.14667	3.64	2.54	3.13	3.10333	0.520778	2.88693	3.03455	2.81207	3.28257	3.00403	3.79508	3.54904	3.64203	3.69118	3.95026	3.92039	3.758	2.37613	2.38277	2.54688	2.40449	2.32398	2.25278	2.38117	2.75326	3.2005	3.10276
ENSDARG00000002685	fam113	ENSMUSG00000037773	Pced1a	ortholog_one2many	39.759	36.7483	0	70.19	0	0.550856	0	0	0	0	0	0	0	0	0	0.06	0	0.02	0	0	0	0	1.02137e-06	4.42382	4.31429	4.76593	4.77509	4.56978	5.09432	5.17219	4.53022	4.47799	4.60511	4.78474	4.77743	5.68572	5.54657	5.27211	5.00244	5.28243	5.80027	5.43159	4.52399	5.00566	4.52497
ENSDARG00000002690	rabif	ENSMUSG00000042229	Rabif	ortholog_one2one	62.8788	67.4797	75	58.42	1	0.0013916	40.9	38.95	40.76	40.2033	19.25	17.92	20.97	19.38	9.79	11.5	21.29	14.1933	2.02	2.92	2.17	2.37	1.18161e-05	15.7797	16.6133	14.597	15.5597	15.6374	26.8219	27.2346	27.2664	27.3999	26.744	28.5065	27.3289	12.2069	13.4963	13.0196	13.393	12.6367	13.3115	13.0107	18.679	18.1625	17.3505
ENSDARG00000002696	gnb3b	ENSMUSG00000023439	Gnb3	ortholog_one2many	67.4556	67.0588	0	0	0	0.000167915	2.84	1.69	1.18	1.90333	0.09	0.11	0.26	0.153333	0.17	0.15	0	0.106667	0	0.05	0.03	0.0266667	0	0	0	0	0	0	0.0984984	0.0330036	0	0.0364106	0.0382512	0.0755774	0.0469569	0.106721	0.314368	0.118595	0.275427	0.367934	0.528388	0.285239	0	0	0
ENSDARG00000002701	rasl12	ENSMUSG00000041696	Rasl12	ortholog_one2one	67.8431	65.0376	50	61.4	0	0.000650341	0.05	0.03	0.03	0.0366667	8.52	11.55	9.06	9.71	0	0	0.02	0.00666667	0.1	0.07	0.06	0.0766667	0	0.581061	0.670812	0.58294	0.581695	0.604127	1.27049	1.2547	1.36579	1.16176	1.16855	0.923537	1.19081	5.60281	5.14572	6.2262	5.90326	5.52295	5.38064	5.63026	3.5613	4.05143	2.94645
ENSDARG00000002707	her11	ENSMUSG00000023781	Hes7	ortholog_one2many	21.1679	25.7778	0	7.25	0	0.550856	0	0	0	0	1.11	1.59	1.07	1.25667	0	0	0	0	0.11	0.03	0.02	0.0533333	0.0315463	0.398501	0.247874	0.65183	0.325219	0.405856	0.04777	0.144055	0.0522702	0.0529755	0.111307	0.0549806	0.0772265	0.0517578	0.050821	0.0575165	0.22899	0.0594806	0	0.074761	0.10982	0.163829	0.172221
ENSDARG00000002710	ncl	ENSMUSG00000026234	Ncl	ortholog_one2one	50.4965	50.3536	50	7.25	0	0.276646	91.68	97.64	96.87	95.3967	127.95	144.99	125.61	132.85	31.84	55.68	213.96	100.493	52.27	50.48	58.57	53.7733	0.0361076	8.86251	9.42756	9.26885	9.41268	9.2429	9.03347	9.47267	9.15125	8.94551	10.2278	8.7862	9.26949	13.5464	13.4005	14.2978	13.8752	13.5504	13.325	13.6659	11.1344	11.4904	11.6611
ENSDARG00000002720	utp15	ENSMUSG00000041747	Utp15	ortholog_one2one	56.2863	55.1136	0	74.94	1	0.012892	4.22	4.29	4.32	4.27667	18.18	18.35	20.05	18.86	2.1	5.11	6.04	4.41667	2.21	2.32	2.43	2.32	2.08834e-10	4.95821	5.02264	4.94817	4.62449	4.88838	5.09453	4.86498	4.13439	4.68453	4.9708	5.08171	4.80516	7.12976	6.32323	6.4151	6.3851	7.24208	6.91114	6.7344	4.26998	3.88263	4.20907
ENSDARG00000002722	ankrd2	ENSMUSG00000025172	Ankrd2	ortholog_one2one	50.6757	45.7317	25	65.66	0	1	0	0	0	0	0	0	0	0	0	0	0	0	0	0	0	0	2.90571e-06	0.0819191	0	0	0.0891396	0.0427647	0.07856	0.473812	0.429803	0.435603	0	0.361672	0.296575	0	0	0	0	0	0	0	0	0	0
ENSDARG00000002731	sdc2	ENSMUSG00000022261	Sdc2	ortholog_one2one	48.0769	49.505	0	17.06	0	1.72314e-07	20.98	19.5	19.76	20.08	73.78	84.08	76.94	78.2667	1.31	3.38	3.84	2.84333	114.59	102.53	121.16	112.76	5.10738e-12	32.7405	32.5032	32.0347	30.3134	31.8979	32.2564	33.5486	34.1566	33.6366	37.1857	36.0175	34.4669	79.3683	77.0739	76.7044	76.5015	83.4372	83.7598	79.4742	45.6592	45.2014	48.6109
ENSDARG00000002732	spon2b	ENSMUSG00000037379	Spon2	ortholog_one2one	58.9124	59.0909	0	83.79	1	0.142463	0	0	0	0	8.06	7.46	9.5	8.34	0	0	0	0	0.2	0.03	0.12	0.116667	0.00844733	0.397504	0.51733	0.466809	0.499085	0.470182	0.586467	0.618994	1.05883	0.780449	0.683252	0.506243	0.705706	0.158856	0.187177	0.141225	0.245988	0.219071	0.254105	0.20107	1.6516	1.37439	1.79719
ENSDARG00000002745	tdh	ENSMUSG00000021953	Tdh	ortholog_one2one	72.2667	72.6542	50	68.27	0	0.00047907	277.93	272.3	260.73	270.32	188.84	187.54	189.52	188.633	25.83	27.46	44.22	32.5033	52.29	109.89	132.43	98.2033	1	0	0	0	0	0	0	0	0	0	0	0	0	0	0	0	0	0	0	0	0	0	0
ENSDARG00000002748	sema6d	ENSMUSG00000038777	Sema6c	ortholog_one2many	41.314	38.5254	25	49.74	0	0.0325012	1.18	1.27	0.81	1.08667	6.16	4.43	5.64	5.41	0.77	1.35	0.99	1.03667	0.91	1.1	1.1	1.03667	0	0.759149	0.982181	0.711933	1.02432	0.869395	0.451372	0.556173	0.54169	0.43597	0.25445	0.251373	0.415171	3.56535	4.39926	3.54129	3.68177	3.57157	3.37067	3.68832	0.234313	0.116516	0.104986
ENSDARG00000002750	phf20a	ENSMUSG00000038116	Phf20	ortholog_one2many	38.6266	35.6436	0	7.85	0	0.00163995	0.61	0.84	0.76	0.736667	3.47	3.29	3.52	3.42667	1.9	3.25	2.66	2.60333	0.07	0.12	0.05	0.08	0	4.92597	4.80368	4.50587	4.74168	4.7443	6.83506	6.65319	6.15357	6.77392	6.34021	6.4627	6.53644	6.89006	6.75615	6.97955	6.97801	7.2502	7.24041	7.01573	7.81687	8.0115	8.765
ENSDARG00000002754	pdcd2l	ENSMUSG00000002635	Pdcd2l	ortholog_one2one	40.8964	40.1099	0	37.08	0	0.0052302	8.86	9.76	9.27	9.29667	5.1	5.02	4.58	4.9	1.39	3.4	3.85	2.88	3.96	3.08	4.33	3.79	3.88565e-09	14.7179	13.5476	14.7173	16.3317	14.8286	17.0712	17.6086	17.7027	17.0754	18.0036	18.428	17.6483	16.3202	16.1436	18.2704	18.5861	17.7134	19.4066	17.7401	13.1459	14.4771	15.4869
ENSDARG00000002758	dedd1	ENSMUSG00000054499	Dedd2	ortholog_one2one	42.0054	46.9697	25	16	0	0.000197213	0	0	0	0	0	0	0	0	0	0	0	0	0	0	0	0	3.2916e-07	4.20347	4.09343	4.02517	3.59033	3.9781	4.24783	4.41516	4.45828	4.64663	4.5112	5.13845	4.56959	3.02133	2.98202	2.88779	3.42836	3.29224	3.16588	3.1296	3.91947	4.16231	3.80253
ENSDARG00000002760	gdf5	ENSMUSG00000038259	Gdf5	ortholog_one2one	55.4852	53.1313	50	85.7	1	1	0	0	0	0	0.6	1.03	0.77	0.8	0	0	0	0	0	0	0	0	0.000497454	0	0	0	0	0	0	0	0	0	0	0	0	0	0	0	0	0	0	0	0	0	0
ENSDARG00000002764	miox	ENSMUSG00000022613	Miox	ortholog_one2one	66.0777	65.614	75	46.2	1	0.000610457	0	0	0	0	0.57	0.41	0.3	0.426667	0	0.15	0	0.05	163.17	153.42	285.59	200.727	0.0937424	0	0	0	0	0	0	0	0	0	0	0	0	0	0	0	0	0	0	0	0	0	0
ENSDARG00000002771	SLC4A5 (1 of many)	ENSMUSG00000068323	Slc4a5	ortholog_one2many	69.7149	70.8292	0	4.35	0	0.273527	0	0.02	0.01	0.01	0.48	0.42	0.26	0.386667	0.09	0	0	0.03	0	0	0.01	0.00333333	1.98968e-07	0.0155257	0.0154515	0.0169303	0	0.0119769	0	0	0	0	0	0	0	0.0161319	0	0	0	0	0	0.00268866	0	0	0
ENSDARG00000002773	htr1fa	ENSMUSG00000050783	Htr1f	ortholog_one2many	55.6452	56.5574	50	92.24	1	0.70251	0	0	0	0	0	0	0	0	0	0.18	0	0.06	0	0	0	0	1	0	0	0	0	0	0	0	0	0	0	0	0	0	0	0	0	0	0	0	0	0	0
ENSDARG00000002779	pdx1	ENSMUSG00000029644	Pdx1	ortholog_one2one	56.5041	48.9437	75	80.37	1	0.507984	1.66	1.14	1.17	1.32333	0.03	0	0	0.01	0.56	0	0	0.186667	0.22	0.21	0.25	0.226667	1	0	0	0	0	0	0	0	0	0	0	0	0	0	0	0	0	0	0	0	0	0	0
ENSDARG00000002787	tle3a	ENSMUSG00000032280	Tle3	ortholog_one2many	90.4639	89.7698	50	72.23	0	1.69132e-06	19.95	19.21	18.04	19.0667	8.09	9.31	8.86	8.75333	1.79	0.76	1.69	1.41333	0.93	1.03	0.71	0.89	0.00097167	0.262917	0.230878	0.396325	0.370236	0.315089	0.741577	0.812523	0.51932	0.633237	0.570213	0.674275	0.658524	0.988283	1.13607	1.0536	1.21753	0.969539	1.02819	1.06554	0.698981	0.779934	0.507972
ENSDARG00000002790	ap2m1a	ENSMUSG00000022841	Ap2m1	ortholog_one2many	97.0522	98.3908	0	0.68	0	3.14617e-09	360.26	370.97	360.2	363.81	111.86	121.36	113.69	115.637	31.13	35.43	41.67	36.0767	14.89	15.13	14.74	14.92	3.81464e-09	159.185	154.448	155.144	153.473	155.562	99.7346	102.086	101.673	99.2553	101.184	105.134	101.511	124.331	122.874	118.911	117.635	125.241	123.979	122.162	142.403	144.347	143.9
ENSDARG00000002791	atp1a1a.2	ENSMUSG00000033161	Atp1a1	ortholog_one2many	81.9336	82.0137	0	28.28	0	0.0823894	7.48	9	7.68	8.05333	98.08	113.47	106.98	106.177	22	37.09	67.47	42.1867	45.22	38.48	49.98	44.56	0.00124763	47.3043	45.39	47.3677	45.8929	46.4887	17.461	17.5709	17.719	16.4686	16.8824	16.9613	17.1772	23.1615	22.0379	24.9641	23.4644	23.885	23.419	23.4886	28.073	29.7577	27.8037
ENSDARG00000002792	arcn1a	ENSMUSG00000032096	Arcn1	ortholog_one2many	82.7112	82.3875	25	9.68	0	1.10415e-06	42.34	41.68	40.78	41.6	8.79	10.59	10.3	9.89333	27.31	35.05	30.77	31.0433	6.18	4.69	5.56	5.47667	5.64998e-06	39.4273	39.2684	38.2135	36.3591	38.3171	33.3931	34.2665	33.8813	32.9681	33.8569	36.0795	34.0742	39.1817	39.213	42.6006	41.0566	41.6323	41.884	40.928	42.221	43.5814	43.5094
ENSDARG00000002794	RNF14 (1 of many)	ENSMUSG00000060450	Rnf14	ortholog_one2many	52.9817	47.6289	25	36.1	0	0.0402899	2.46	2.77	2.52	2.58333	4.89	4.72	4.98	4.86333	1.88	0.46	0.96	1.1	1.61	1.39	1.4	1.46667	5.39776e-06	58.6811	58.1712	55.4636	58.2463	57.6406	45.6296	47.3497	46.8076	45.9942	46.2285	47.1408	46.5251	49.5985	51.4733	50.2328	49.5559	52.0706	50.7347	50.611	46.4868	50.2797	53.4166
ENSDARG00000002797	BX908804.1	ENSMUSG00000070424	Art5	ortholog_many2many	26.6667	18.123	25	0.63	0	0.550856	0	0	0	0	0	0	0	0	0	0	0	0	0.1	0.02	0	0.04	0	0.0437857	0	0.381976	0.142935	0.142174	1.38568	1.18184	1.19459	1.02445	1.66328	1.40152	1.30856	0.272973	0.312705	0.252788	0.100642	0.156852	0.207926	0.217314	0	0	0
ENSDARG00000002798	cog8	ENSMUSG00000031916	Cog8	ortholog_one2one	63.8801	63.2812	25	77.83	1	0.000502547	5.83	6.92	6.73	6.49333	8.06	10.91	8.7	9.22333	3.3	3.1	1.93	2.77667	3.14	2.22	2.59	2.65	1.85863e-05	24.8743	22.3186	23.0348	20.1098	22.5844	19.6612	18.0025	20.5141	21.0596	20.6478	19.819	19.9507	12.0142	14.6121	12.5656	15.1645	12.4145	12.4812	13.2087	14.1597	17.6614	14.7812
ENSDARG00000002816	rasgrf2b	ENSMUSG00000021708	Rasgrf2	ortholog_one2many	76.8489	80.4714	50	24.58	0	0.0114021	0	0	0	0	0.03	0.05	0	0.0266667	0.02	0.04	0	0.02	0.01	0	0	0.00333333	0	0	0	0	0	0	0	0	0	0	0	0	0	0	0	0	0	0	0	0	0.0225498	0.0336398	0.0707259
ENSDARG00000002826	cep57l1	ENSMUSG00000019813	Cep57l1	ortholog_one2one	30.1619	34.7319	75	0	0	0.000152044	5.61	5.17	5.7	5.49333	5.48	3.9	4.83	4.73667	0.57	1.14	2.31	1.34	0.21	0.25	0.18	0.213333	1.82408e-10	0.145642	0.207067	0.0907535	0.249039	0.173126	0.618539	0.681927	0.633144	0.575306	0.441669	0.574116	0.58745	1.68624	1.868	2.018	1.64989	2.06207	2.17365	1.90964	0.252286	0.159668	0.38365
ENSDARG00000002830	trmt2a	ENSMUSG00000022721	Trmt2a	ortholog_one2one	53.958	54.4861	25	48.5	0	0.00654585	10.09	11.89	10.17	10.7167	5.98	6.8	5.1	5.96	1.42	0.78	2.28	1.49333	0.9	1.1	1.17	1.05667	4.03436e-07	11.2093	11.4455	10.9137	10.7122	11.0702	11.0987	10.6652	10.6357	11.534	10.9582	11.3479	11.0399	8.88651	8.83707	8.88773	8.53247	7.82232	8.27396	8.54001	10.9121	11.2713	9.68867
ENSDARG00000002831	col4a4	ENSMUSG00000067158	Col4a4	ortholog_one2one	46.5269	46.195	50	0.09	0	0.000113464	0.03	0.08	0.03	0.0466667	0.89	0.72	0.48	0.696667	0.05	0.02	0.04	0.0366667	0.04	0.04	0.01	0.03	0.000288235	0.0679314	0.0929596	0.0833368	0.203277	0.111876	0.0325729	0.0327424	0.0445518	0.0632142	0.0474356	0.0749791	0.0492493	0.299982	0.294553	0.254922	0.185418	0.324464	0.272183	0.27192	0.336972	0.33513	0.166362
ENSDARG00000002847	fndc1	ENSMUSG00000071984	Fndc1	ortholog_one2one	32.3404	30.7159	0	31.4	0	0.678236	0.19	0.29	0.19	0.223333	0.02	0.03	0.02	0.0233333	0.06	0	0.01	0.0233333	0.00713	0.00825	0.00946	0.00828	6.84898e-11	0	0	0	0.0099014	0.00247535	0.165799	0.122803	0.143224	0.116126	0.203327	0.140608	0.148648	0.226913	0.25994	0.178613	0.261438	0.325963	0.378091	0.271826	0.21064	0.189537	0.1573
ENSDARG00000002877	reps1	ENSMUSG00000019854	Reps1	ortholog_one2one	72.1871	71.8239	0	78.96	1	0.000347856	8.39	8.17	8.98	8.51333	9.79	9.5	9.2	9.49667	1.5	2.36	2.94	2.26667	2.73	2.26	2.49	2.49333	1.89513e-09	22.2685	22.5344	22.0958	21.6972	22.149	13.0252	12.1425	13.9133	13.2152	13.2185	12.6271	13.0236	13.8122	14.2039	13.0525	12.8547	14.6958	12.6937	13.5522	8.13244	7.47298	8.56104
ENSDARG00000002880	vps50	ENSMUSG00000001376	Vps50	ortholog_one2many	83.2124	83.2988	75	94.02	1	1.18205e-06	2.37	1.76	2.33	2.15333	0.79	0.54	0.88	0.736667	1.32	2.27	2.58	2.05667	0.87	1.07	0.93	0.956667	1.93347e-05	7.04718	6.98875	7.30458	6.94576	7.07157	4.52935	4.32887	4.38117	4.06071	4.69258	4.57171	4.4274	2.66503	2.63374	2.99989	2.62336	2.5671	2.58182	2.67849	3.87043	4.25876	3.52031
ENSDARG00000002894	aven	ENSMUSG00000003604	Aven	ortholog_one2one	34.7826	32.7485	100	25.22	0	0.000347676	9.13	9.13	9.33	9.19667	7.97	9.67	8.49	8.71	2.59	2.84	3.8	3.07667	1.32	1.8	1.62	1.58	2.04024e-08	3.17127	2.9768	3.51712	3.29394	3.23979	3.59418	3.19601	2.9874	3.14268	3.30155	3.20197	3.2373	2.62111	3.01487	3.01677	3.27186	2.8616	2.7167	2.91715	2.24445	2.15316	1.9935
ENSDARG00000002897	INPP1	ENSMUSG00000026102	Inpp1	ortholog_one2one	47.4934	45.4545	0	85.75	0	7.99757e-05	5.43	4.22	3.57	4.40667	3.94	3.17	3.88	3.66333	2.05	1.08	1.88	1.67	0.82	0.61	1.59	1.00667	0	12.9587	13.0217	13.766	13.5241	13.3176	10.4876	9.72194	10.2754	11.1113	10.3327	10.5772	10.4177	2.21755	2.8036	2.17436	2.61307	2.24861	2.11969	2.36281	4.47455	3.93014	3.47236
ENSDARG00000002909	tjp3	ENSMUSG00000034917	Tjp3	ortholog_one2one	35.0303	31.969	0	74.06	0	2.25653e-11	9.97	9.64	9.39	9.66667	8.34	7.11	7.02	7.49	0	0.02	0	0.00666667	1.83	2.18	1.91	1.97333	3.89402e-07	19.0115	20.1959	17.417	16.7638	18.3471	18.0891	18.8151	19.4804	18.6658	19.5095	19.5368	19.0161	12.9422	13.772	13.4876	12.3629	13.6635	14.4336	13.4436	18.6904	18.1309	19.7464
ENSDARG00000002912	adipor1a	ENSMUSG00000026457	Adipor1	ortholog_one2many	81.0667	81.0667	75	95.22	1	2.14317e-09	323.43	327.6	340.16	330.397	31.52	29.58	30.98	30.6933	5.98	12.05	9.32	9.11667	4.56	5.1	5.84	5.16667	5.75389e-08	119.377	116.201	117.388	116.864	117.458	106.038	105.933	109.121	110.422	107.209	110.108	108.139	85.0401	88.4042	84.6459	88.3718	88.8854	91.5222	87.8116	105.934	103.92	101.906
ENSDARG00000002916	sec31b	ENSMUSG00000051984	Sec31b	ortholog_one2one	46.029	46.5458	50	87.83	0	0.00111916	3.04	3.76	2.6	3.13333	0.92	1.89	1.05	1.28667	0.28	0.12	0.82	0.406667	0.84	0.84	0.6	0.76	0.013981	0.0684387	0.0681119	0.124384	0.0496474	0.0776455	0.568814	0.593764	0.359076	0.242614	0.509758	0.402875	0.44615	0.450371	0.465495	0.368775	0.209743	0.435849	0.324997	0.375872	0	0	0
ENSDARG00000002917	gls2b	ENSMUSG00000044005	Gls2	ortholog_one2many	61.4035	63.9535	0	13.39	0	0.0148522	0	0	0	0	0.04	0	0	0.0133333	0.04	0	0	0.0133333	0.16	0.47	0.37	0.333333	0.000313877	0.259387	0.309778	0.282854	0.310475	0.290623	0.174125	0.100018	0.0544368	0	0.0289802	0.0858893	0.0739083	0.377322	0.396957	0.239602	0.178861	0.340703	0.246352	0.296633	0.972161	0.796225	0.717438
ENSDARG00000002933	gbx2	ENSMUSG00000034486	Gbx2	ortholog_one2one	74.8538	73.5632	75	92.68	1	0.550856	0	0	0	0	0	0	0	0	0	0	0	0	0	0.00816	0	0.00272	0.433346	0	0	0	0	0	0	0	0	0	0	0	0	0	0	0	0	0	0	0	0	0	0
ENSDARG00000002945	bgnb	ENSMUSG00000031375	Bgn	ortholog_one2many	65.5827	65.5827	0	52.7	0	0.00123464	1.36	1.75	2.22	1.77667	59.02	52.61	56.61	56.08	0.09	0.16	0.03	0.0933333	4.64	8.33	4.73	5.9	4.05152e-05	0.126454	0.10068	0.0275788	0.22016	0.118718	0.509328	0.560737	0.451155	0.403449	0.649895	0.614122	0.531448	0.551846	0.567661	0.730054	0.697574	0.785184	0.690569	0.670481	2.31394	2.32901	2.01111
ENSDARG00000002947	abcd3b	ENSMUSG00000028127	Abcd3	ortholog_one2many	83.2317	82.8528	100	1.76	1	0.0111466	8.41	10.47	9.17	9.35	7.09	6.85	7.17	7.03667	2.3	4.8	8.51	5.20333	1.56	0.92	1.26	1.24667	8.97466e-05	16.9385	15.6899	14.9349	14.2995	15.4657	12.7865	14.1074	12.5807	12.6824	13.1328	12.2912	12.9302	20.8362	20.1979	20.9129	19.6138	20.7864	20.6409	20.498	23.8218	24.9077	25.2985
ENSDARG00000002949	ppp6c	ENSMUSG00000026753	Ppp6c	ortholog_one2one	100	100	50	100	1	1.36845e-06	91.16	80.67	84.81	85.5467	71.62	63.54	69.47	68.21	40.96	47.21	34.9	41.0233	10.16	11.11	9.6	10.29	3.25436e-09	15.2686	14.6104	15.3232	14.2976	14.875	9.29496	9.40195	9.76632	9.46682	9.90008	9.35513	9.53088	16.4547	15.4536	16.1316	16.662	17.1667	17.1878	16.5094	11.9583	11.2927	11.5907
ENSDARG00000002952	smo	ENSMUSG00000001761	Smo	ortholog_one2one	66.4234	68.8525	25	91.79	1	1.57504e-08	0.21	0.24	0.19	0.213333	4.03	3.09	3.01	3.37667	0.09	0.05	0.21	0.116667	0.56	0.58	0.3	0.48	0	4.2206	5.05477	4.2124	4.43693	4.48118	6.83736	6.13736	6.90597	7.02452	7.24642	7.10615	6.87629	21.1094	22.2601	19.7687	20.6354	21.5542	22.2789	21.2678	16.0077	14.7438	17.6151
ENSDARG00000002956	si:dkey-32n7.4	ENSMUSG00000108596	Itgam	ortholog_many2many	34.1549	31.4935	50	11.91	0	8.20443e-05	0	0.01	0.02	0.01	0.23	0.09	0.08	0.133333	52.68	74.43	44	57.0367	1.4	2.41	1.19	1.66667	0.0224261	0	0	0	0	0	0	0	0	0	0	0	0	0	0	0	0	0	0	0	0	0	0
ENSDARG00000002959	gpr34b	ENSMUSG00000040229	Gpr34	ortholog_one2many	33.6493	18.9333	100	76.17	0	0.00021521	0	0	0	0	0	0	0	0	3.93	3.36	5.56	4.28333	0.13	0.13	0.01	0.09	4.03039e-11	0.258692	0.0429094	0.047016	0.0938312	0.110612	0.537515	0.540311	0.316697	0.137559	0.289026	0.333119	0.359038	0	0	0	0	0	0	0	0	0.0472673	0
ENSDARG00000002967	pdap1b	ENSMUSG00000029623	Pdap1	ortholog_one2one	69.6629	68.5083	50	3.42	0	0.00160825	53.48	47.57	52.17	51.0733	38.76	36.03	31.92	35.57	7.54	17.06	13.8	12.8	8.73	6.05	8.7	7.82667	0.622728	3.0966	3.22189	3.49954	4.19661	3.50366	3.69853	3.47353	2.71766	3.17347	2.73631	2.73429	3.08896	4.62153	3.96347	3.83555	4.04408	3.79845	3.84333	4.01773	5.12021	5.18479	6.229
ENSDARG00000002968	a1cf	ENSMUSG00000052595	A1cf	ortholog_one2one	80.0341	78.8235	100	62.36	1	8.19232e-06	0	0	0	0	0.12	0.03	0.08	0.0766667	0	0.08	0	0.0266667	209.86	151.22	188.54	183.207	4.50517e-07	0	0	0	0	0	0	0	0	0	0	0	0	0	0	0	0	0	0	0	0	0	0
ENSDARG00000002970	ss18	ENSMUSG00000037013	Ss18	ortholog_one2one	77.4457	68.1818	0	100	1	7.45936e-07	80.51	86.9	78.45	81.9533	45.5	46.5	44.99	45.6633	6.33	8.74	6.35	7.14	5.88	5.15	6.03	5.68667	7.34747e-13	26.1188	26.7476	24.0499	23.6517	25.142	16.2782	18.0338	16.8918	17.4376	18.052	16.2944	17.1646	31.3824	32.1357	31.7456	33.5662	31.1882	32.356	32.0623	32.4372	33.4611	31.0422
ENSDARG00000002971	phc1	ENSMUSG00000040669	Phc1	ortholog_one2one	38.4018	34.2574	0	58.6	0	1.36194e-05	2.69	2.47	2.27	2.47667	2.4	3.07	2.95	2.80667	0.73	0.09	1.16	0.66	0.56	0.51	0.53	0.533333	6.11702e-12	1.42898	1.81156	1.50261	1.64749	1.59766	1.71298	1.86948	1.87435	1.84537	1.7676	1.765	1.8058	2.17415	2.49928	2.29819	2.56116	2.62043	2.78705	2.49004	4.1068	3.59944	3.48974
ENSDARG00000002986	gda	ENSMUSG00000058624	Gda	ortholog_one2one	59.5556	59.0308	100	29.15	1	2.10585e-05	0	0	0	0	0.65	0.34	0.86	0.616667	3.43	8.12	6.93	6.16	24.73	20.21	22.07	22.3367	2.1498e-07	0	0	0	0	0	0.0704286	0.113272	0.107889	0.0937239	0.0328206	0.0324237	0.0750929	0.0152616	0.0149854	0.0169596	0	0	0	0.00786776	0.404776	0.402562	0.25391
ENSDARG00000002991	cep135	ENSMUSG00000036403	Cep135	ortholog_one2one	50.6014	51.6667	0	70.83	0	0.000904841	2.62	3.89	2.74	3.08333	2.46	1.91	2.18	2.18333	1.82	0.63	0	0.816667	0.83	0.26	0.79	0.626667	1.60866e-08	0.463843	0.486581	0.601501	0.450163	0.500522	0.48089	0.459222	0.565657	0.51996	0.420189	0.761031	0.534491	0.768525	0.511604	0.622431	0.504261	0.553869	0.535784	0.582746	0.953521	0.783383	0.736826
ENSDARG00000002994	itpkca	ENSMUSG00000003752	Itpkc	ortholog_one2many	50.1199	30.826	0	15.72	0	0.000499783	1.95	2.49	2.53	2.32333	0.83	1.54	1.06	1.14333	0.57	1.78	2.23	1.52667	5.55	4.99	4.83	5.12333	0.00424603	0.964415	2.26417	1.13256	1.69522	1.51409	1.06716	2.02622	0.856304	0.788963	0.884103	0.79153	1.06905	1.84998	1.43806	2.45556	1.0231	2.56894	2.37794	1.95227	1.41747	0.596419	0.769464
ENSDARG00000003008	prkcea	ENSMUSG00000045038	Prkce	ortholog_one2many	85.7724	85.8887	25	38.69	0	3.46623e-07	25.55	27.8	26.62	26.6567	2.99	3.25	3.43	3.22333	0.93	0.04	0.46	0.476667	1.69	1.19	0.93	1.27	0.0255554	0.297847	0.345828	0.392458	0.405124	0.360314	0.523661	0.430678	0.638105	0.646715	0.610081	0.712286	0.593588	0.373952	0.405168	0.229274	0.299515	0.459387	0.500931	0.378038	0.465127	0.53061	0.586395
ENSDARG00000003020	lrrc4.2	ENSMUSG00000049939	Lrrc4	ortholog_one2many	72.5155	71.6258	25	100	1	1	0	0	0	0	0.39	0.39	0.59	0.456667	0	0	0	0	0.01	0	0	0.00333333	0	0.0225503	0.0224426	0.0491809	0.0245379	0.0296779	0.0432512	0.0217381	0	0.0239822	0.050389	0.0497797	0.0315234	0.164016	0.138041	0.156227	0.0777483	0.134635	0.160628	0.138549	0.149147	0.0494438	0.0519765
ENSDARG00000003021	hdac8	ENSMUSG00000067567	Hdac8	ortholog_one2one	72.2222	72.4138	75	90.19	1	5.59616e-08	8.51	7.65	8.09	8.08333	9.24	6.92	7.7	7.95333	2.64	1.74	2.55	2.31	1.39	1.47	1.5	1.45333	1.04645e-09	1.26628	0.593052	1.05594	1.05369	0.992241	1.14293	0.96936	1.15289	1.16845	1.08188	1.21267	1.12136	2.0123	1.80489	2.21469	1.86191	1.71218	1.56963	1.8626	1.33428	1.30657	1.11597
ENSDARG00000003022	limk1b	ENSMUSG00000029674	Limk1	ortholog_one2many	72.9938	73.1066	0	0	0	0.0221724	0	0	0	0	0.03	0	0.02	0.0166667	1.61	1.04	2.89	1.84667	0.64	0.77	0.56	0.656667	0.00239475	0.226473	0.212869	0.260682	0.177981	0.219501	0.0965272	0.0121287	0.132026	0.0802843	0.140571	0.0555486	0.086181	0.196097	0.256731	0.217915	0.318115	0.240381	0.164306	0.232257	0.110954	0.234489	0.2175
ENSDARG00000003027	scnm1	ENSMUSG00000092607	Scnm1	ortholog_one2one	30.5221	40.8602	100	45.15	0	7.6824e-06	6.26	6.85	6.82	6.64333	11.06	11.94	10.78	11.26	6.96	8.18	9.04	8.06	0.71	0.82	0.83	0.786667	0	17.389	18.8585	17.7114	18.2727	18.0579	19.14	18.355	17.3322	17.4197	18.4028	17.0155	17.9442	28.6515	26.5414	27.5482	26.6284	25.64	24.4568	26.5777	27.463	27.2122	25.9623
ENSDARG00000003035	hspa9	ENSMUSG00000024359	Hspa9	ortholog_one2one	85.4839	85.8616	0	47.4	0	0.000372779	112.99	117.07	119.82	116.627	64.18	60.48	58.31	60.99	16.37	51.19	37.69	35.0833	33.71	26.95	33.16	31.2733	0.000170475	53.9245	52.2985	52.9053	51.72	52.7121	48.2628	48.315	49.3224	49.2081	49.4681	48.8699	48.9077	44.5051	44.4244	46.1756	45.8017	47.9166	48.3741	46.1996	41.7083	42.0078	40.8847
ENSDARG00000003046	sorbs2a	ENSMUSG00000031626	Sorbs2	ortholog_one2many	45.0525	49.5058	100	24.09	0	0.0911901	0.05	0.04	0.06	0.05	0.19	0.15	0.17	0.17	0	0	0	0	0.4	0.48	0.32	0.4	7.91078e-13	15.2635	15.0014	15.5573	15.4182	15.3101	39.0661	38.885	41.3403	39.5411	41.6644	41.7184	40.3692	4.68269	4.80608	4.87178	4.61987	5.06029	4.93195	4.82878	14.7247	14.08	14.2722
ENSDARG00000003054	tacr3l	ENSMUSG00000028172	Tacr3	ortholog_one2many	65.8228	57.5221	0	43.56	0	0.118204	0	0	0	0	0	0	0.01	0.00333333	0.05	0	0.08	0.0433333	0.03	0.1	0.03	0.0533333	0.000504032	0	0	0	0	0	0.091883	0.0692707	0.125673	0.203791	0.107046	0.13219	0.121642	0	0	0	0	0	0	0	0	0	0
ENSDARG00000003058	fgfr1op	ENSMUSG00000069135	Fgfr1op	ortholog_one2one	34.8249	44.8622	25	15.14	0	4.51117e-08	69.25	63.84	60.5	64.53	19.91	19.83	19.61	19.7833	5.74	5.66	4.86	5.42	1.67	2.03	1.45	1.71667	2.88837e-05	9.17297	9.39767	8.48281	9.17418	9.05691	9.05556	8.90761	9.24806	9.08593	9.29406	8.75981	9.05851	4.08813	5.34454	5.42562	4.98683	4.56389	4.72433	4.85556	10.0373	9.71127	8.96502
ENSDARG00000003061	cd276	ENSMUSG00000035914	Cd276	ortholog_one2one	47	44.6203	50	1.82	0	0.164425	1.28	1	0.95	1.07667	30.37	31.43	29.42	30.4067	0.04	1.68	1.22	0.98	0.61	0.85	0.77	0.743333	5.37462e-07	0.546624	0.435211	0.298039	0.297402	0.394319	0.183473	0.237121	0.229437	0.406933	0.122144	0.150834	0.221657	1.98789	1.33846	2.14596	1.66476	2.21924	2.01172	1.89467	1.32563	1.07868	0.97644
ENSDARG00000003068	gorasp1a	ENSMUSG00000032513	Gorasp1	ortholog_one2one	40.9978	42.3767	50	20.94	0	0.306536	2.72	2.81	3.43	2.98667	0.48	0.19	0.29	0.32	4.3	1.99	1.93	2.74	3.42	2.76	3.44	3.20667	7.36192e-05	26.5443	27.3187	23.1341	26.3503	25.8369	15.8293	17.9816	15.773	16.1234	14.4816	15.5058	15.9491	14.4356	12.6698	14.6377	12.5771	13.4076	14.0672	13.6325	14.0029	12.5081	12.6122
ENSDARG00000003069	btbd7	ENSMUSG00000041702	Btbd7	ortholog_one2one	71.402	68.0531	100	100	1	0.0127302	0.32	0.27	0.21	0.266667	0.09	0.15	0.16	0.133333	0.16	0.25	0	0.136667	0.8	0.72	0.65	0.723333	0	2.5159	3.35937	2.49202	3.42207	2.94734	3.01591	3.35497	3.30003	4.19184	3.32624	2.89262	3.34693	2.70128	2.07485	2.71133	2.57818	2.92909	2.51391	2.58477	8.15826	6.84948	6.52379
ENSDARG00000003081	mybphb	ENSMUSG00000068745	Mybphl	ortholog_many2many	34.4961	50.1408	0	12.57	0	8.67294e-05	3.62	1.77	2.12	2.50333	3.26	3.88	3.42	3.52	0.04	0.1	0	0.0466667	0.1	0.27	0	0.123333	1	0	0	0	0	0	0	0	0	0	0	0	0	0	0	0	0	0	0	0	0	0	0
ENSDARG00000003084	spire2	ENSMUSG00000010154	Spire2	ortholog_one2one	54.9315	55.8496	0	72.72	0	0.190259	0	0.05	0.02	0.0233333	0.07	0	0	0.0233333	0	0	0	0	0.88	1.97	0.04	0.963333	0	17.4808	17.7052	16.9114	16.9174	17.2537	6.93553	6.97161	6.81782	6.41627	6.82704	7.21404	6.86372	9.60409	8.36492	7.10023	7.11147	8.49719	6.93292	7.93514	28.478	27.6015	24.3355
ENSDARG00000003085	stambpl1	ENSMUSG00000059430	Actg2	ortholog_one2many	6.94444	7.97872	0	0	0	0.317613	0.79	0.5	0.81	0.7	3.93	3.63	3.66	3.74	3.95	0.7	0.5	1.71667	0.26	0.39	0.33	0.326667	3.21171e-07	0	0	0	0	0	0	0	0	0	0	0	0	0	0	0	0	0	0	0	0	0	0
ENSDARG00000003087	ubxn6	ENSMUSG00000019578	Ubxn6	ortholog_one2one	54.9199	54.2986	50	87.14	1	0.0166955	7.15	7.74	8.21	7.7	4.83	4.67	4.07	4.52333	1.72	2.23	0	1.31667	3.9	3.51	4.12	3.84333	1.49383e-10	15.8507	15.9012	16.1093	15.247	15.777	11.8717	12.1627	11.7094	11.6988	11.2985	11.6518	11.7322	8.86066	9.10458	9.35236	10.0009	9.19855	8.95719	9.2457	9.6449	9.01871	9.18841
ENSDARG00000003091	oclnb	ENSMUSG00000021638	Ocln	ortholog_one2many	42.7699	40.3071	75	12.41	0	0.000143903	2.07	1.56	1.81	1.81333	3.58	2.47	2.9	2.98333	0.53	0	0	0.176667	1.6	0.05	0.06	0.57	3.0366e-07	19.8492	19.0534	17.7116	18.2312	18.7113	39.7898	38.8652	38.9246	37.2254	38.5111	38.3987	38.6191	11.931	11.9111	12.5192	12.6569	11.8253	12.4411	12.2141	14.4928	15.911	16.0865
ENSDARG00000003098	kdm5bb	ENSMUSG00000042207	Kdm5b	ortholog_one2many	62.2309	61.7876	0	49.16	0	3.39331e-05	3.61	4.63	5.1	4.44667	2.88	2.79	3.21	2.96	1.19	1.41	4.64	2.41333	6.05	4.15	5.14	5.11333	6.31875e-10	13.9846	13.8825	13.9548	13.4814	13.8258	6.35711	6.39872	6.6212	6.2016	6.31708	6.65152	6.42454	7.21008	6.57326	7.77694	7.66928	7.70388	7.0912	7.33744	8.54794	8.42347	8.24216
ENSDARG00000003109	rcan1a	ENSMUSG00000022951	Rcan1	ortholog_one2many	57.868	45.4183	25	39.52	0	0.000482402	74.69	69.55	70.2	71.48	24.41	26.31	23.64	24.7867	23.53	25.87	13.14	20.8467	1.88	1.72	1.66	1.75333	1.99547e-07	11.6504	12.8115	14.1945	14.712	13.3421	9.41403	9.60165	8.67839	9.33088	9.92309	10.0015	9.4916	25.2942	25.7169	23.6245	23.8446	24.2595	24.973	24.6188	19.8188	20.4989	18.9382
ENSDARG00000003113	ada	ENSMUSG00000017697	Ada	ortholog_one2one	63.5359	65.3409	75	4.24	1	2.21151e-05	3.01	3.79	4.15	3.65	8.36	8.85	8.73	8.64667	37.26	35.47	24.45	32.3933	2.67	3.01	2.39	2.69	5.16694e-12	0.225052	0.627137	0.294496	0.489778	0.409116	0.863296	0.564061	0.472311	0.813764	0.854902	0.596163	0.694083	0.467681	0.413295	0.467745	0.3621	0.214986	0.267178	0.365498	0	0	0.103745
ENSDARG00000003127	zgc:123105	ENSMUSG00000025871	4833439L19Rik	ortholog_one2many	34.9515	11.8812	0	6.02	0	5.8739e-05	265.68	264.08	252.59	260.783	63.46	60.53	65.47	63.1533	8.22	17.66	21.97	15.95	52.98	55.78	56.52	55.0933	1.20622e-06	275.338	272.334	260.35	264.84	268.215	277.523	276.841	278.419	282.506	284.91	282.151	280.392	152.152	143.369	144.334	144.147	150.343	151.119	147.577	190.311	194.602	193.915
ENSDARG00000003142	dachc	ENSMUSG00000055639	Dach1	ortholog_one2many	82.4877	67.1105	50	0.22	0	3.75031e-07	24.12	25.99	26.71	25.6067	8.83	10.13	8.18	9.04667	0.06	0.13	0.34	0.176667	0.13	0.08	0.04	0.0833333	1.36899e-12	3.31281	3.1254	2.83362	3.21619	3.12201	1.31094	1.21092	1.58951	1.33592	1.40345	1.48163	1.38873	0.37109	0.427197	0.284399	0.353836	0.367638	0.380133	0.364049	1.31682	1.20161	1.30574
ENSDARG00000003144	pxmp2	ENSMUSG00000029499	Pxmp2	ortholog_one2one	54.1237	54.4041	0	4.32	0	1.56006e-07	2.8	3.34	4.38	3.50667	4.54	5.59	5.32	5.15	2.78	4.97	6.2	4.65	100.84	122.47	109.43	110.913	6.45466e-06	9.31147	8.66913	9.49879	9.72365	9.30076	7.41737	7.60073	7.95852	8.22564	7.63469	7.62525	7.7437	35.5013	32.5604	32.168	32.6216	33.8044	34.9462	33.6003	29.3029	33.0119	28.9047
ENSDARG00000003145	CLMP	ENSMUSG00000032024	Clmp	ortholog_one2one	49.2701	36.193	0	31.7	0	0.0706575	0	0.04	0	0.0133333	1.24	1.23	0.79	1.08667	0.14	0.47	0.06	0.223333	0.02	0.01	0.03	0.02	0	0.255161	0.273476	0.299649	0.277651	0.276484	0.621156	0.359495	0.432518	0.542725	0.548231	0.454946	0.493179	1.87627	2.16271	1.97171	2.03016	1.47655	2.07385	1.93187	4.39216	4.30358	4.18473
ENSDARG00000003151	skp1	ENSMUSG00000036309	Skp1a	ortholog_one2one	99.3865	99.3865	100	53.43	1	1.51661e-05	902.53	912.55	860.16	891.747	387.92	428.11	391.78	402.603	110.6	112.89	201.74	141.743	56.94	60.34	62.05	59.7767	0	5093.29	5103.12	5333.24	5359.51	5222.29	3612.82	3604.03	3620.01	3620.23	3697.83	3667.33	3637.04	9625.11	9605.51	10022.7	9984.69	10183.4	10130.7	9925.37	6043.71	6031.65	6073.08
ENSDARG00000003153	nudt21	ENSMUSG00000031754	Nudt21	ortholog_one2one	97.3684	97.7974	0	100	1	0.00444915	0	0	0	0	0	0	0	0	0	0	0	0	0	0	0	0	5.98225e-10	7.27235	8.55355	9.11982	8.38096	8.33167	8.08366	8.22131	6.69459	8.26144	8.34668	8.50115	8.01814	15.7309	17.6383	16.4125	15.006	17.1308	16.757	16.4459	7.79789	9.4585	7.96202
ENSDARG00000003157	nfkbil1	ENSMUSG00000042419	Nfkbil1	ortholog_one2one	33.3333	31.4961	0	0	0	0.000219519	0.53	0.51	0.69	0.576667	1.16	1.12	1.55	1.27667	0.19	0.33	0.7	0.406667	0.47	0.46	0.39	0.44	0.000247421	1.39347	1.59227	1.18186	1.2355	1.35077	3.06861	3.48258	2.38287	2.68946	2.01816	2.16465	2.63439	2.73489	2.68539	2.92	3.44016	3.75923	3.24733	3.13117	1.70674	1.47108	1.42748
ENSDARG00000003165	nr2f6b	ENSMUSG00000002393	Nr2f6	ortholog_one2many	72.2772	74.8718	50	0	0	0.00010902	38.42	43.26	42.64	41.44	29.46	27.22	27.42	28.0333	0.03	0.04	0	0.0233333	3.37	3.07	3.12	3.18667	5.45258e-07	22.3843	19.5115	21.7411	21.3003	21.2343	17.2658	16.0452	18.2267	15.8704	14.9514	18.0381	16.7329	29.6301	29.4945	28.6366	29.44	28.6044	29.4073	29.2021	28.8705	30.6666	29.7309
ENSDARG00000003167	mlst8	ENSMUSG00000024142	Mlst8	ortholog_one2one	88.2006	91.7178	25	98.08	1	8.89739e-05	15.3	16.97	17.33	16.5333	26.08	24.9	23.68	24.8867	5.45	9.12	6.66	7.07667	2.14	2.09	2.51	2.24667	1.42182e-06	14.0815	15.3731	13.8666	12.6135	13.9837	13.4014	15.226	14.8043	14.7479	14.3867	15.3061	14.6454	12.6286	13.9296	12.21	13.845	13.458	12.2996	13.0618	10.8008	11.4461	10.9217
ENSDARG00000003169	magi1b	ENSMUSG00000045095	Magi1	ortholog_one2many	57.1843	53.569	25	79.49	1	1.08287e-05	11.95	13.24	9.33	11.5067	3.71	3.66	3.29	3.55333	0.22	0.19	0.27	0.226667	1.13	1.58	0.92	1.21	3.01797e-11	0.442931	0.39843	0.417984	0.528316	0.446915	0.702502	0.870379	0.92063	0.942112	0.92312	1.08119	0.906655	1.75241	1.82497	1.88837	1.94807	1.93251	1.67864	1.8375	1.21125	1.38205	1.40376
ENSDARG00000003175	stx5al	ENSMUSG00000010110	Stx5a	ortholog_one2many	64.8415	63.3803	0	35.34	0	0.000586078	16.83	15.07	15.98	15.96	4.83	4.78	6.1	5.23667	2.92	6.68	3.45	4.35	4.57	4.41	4.47	4.48333	5.84644e-07	17.3753	17.2923	18.1559	18.433	17.8141	22.9064	22.4059	21.6919	21.9405	22.0767	20.5282	21.9249	23.9784	24.0098	23.9649	22.9711	24.8823	25.4768	24.2139	14.2393	13.3431	12.7362
ENSDARG00000003189	psmd1	ENSMUSG00000094638	Gm21972	ortholog_one2many	7.78008	76.5306	25	96	1	0.0420998	24.08	22.29	18.12	21.4967	27.02	31.89	32.32	30.41	3.82	5.59	24.26	11.2233	14.73	12.43	18.3	15.1533	0.0395174	3.83204	0	3.92547	0.126358	1.97097	1.55905	0	1.34037	0.86447	1.55686	1.15353	1.07905	0.120657	1.7771	0.134082	1.20109	0.13866	0.137858	0.584908	0.128005	2.80071	2.40887
ENSDARG00000003193	rassf7b	ENSMUSG00000038618	Rassf7	ortholog_one2many	32.6437	39.5543	25	7.49	0	3.69758e-08	177.31	185.22	170.54	177.69	47.09	49.76	47.89	48.2467	0.08	0	0	0.0266667	6.13	6.76	5.35	6.08	1.85945e-08	9.09753	9.23516	9.07733	8.16701	8.89426	4.14413	4.16568	3.57989	2.8058	2.99846	3.81572	3.58495	11.6269	11.4629	10.5045	12.1283	13.1445	11.6105	11.7463	16.6473	16.7557	13.6823
ENSDARG00000003197	wdr21	ENSMUSG00000021222	Dcaf4	ortholog_one2one	58.1761	35.6455	0	73.32	0	0.00184425	7.3	7.39	7.82	7.50333	19.73	19.17	20.68	19.86	5.2	5.91	9.48	6.86333	6.22	6.52	5.83	6.19	5.44429e-11	16.7145	18.143	17.8489	16.2088	17.2288	25.331	21.7477	26.9902	27.1242	26.9956	27.7685	25.9929	13.4978	14.4463	13.8496	14.8299	14.2192	13.1602	14.0005	14.7972	13.2921	16.1687
ENSDARG00000003200	foxm1	ENSMUSG00000001517	Foxm1	ortholog_one2one	47.9936	39.498	0	55.22	0	0.016587	0	0	0	0	0.11	0.31	0.19	0.203333	0	0	0	0	0.06	0.07	0	0.0433333	0.0101025	0.172266	0.264958	0.153697	0.18745	0.194593	0.120147	0.211351	0.197199	0.216515	0.367435	0.241995	0.225774	0.130177	0.207709	0.253157	0.215977	0.224401	0.241696	0.212186	0	0	0
ENSDARG00000003203	rhcga	ENSMUSG00000030549	Rhcg	ortholog_one2many	59.5092	58.4337	0	84.81	1	0.0202699	0	0	0	0	1.86	2.87	2.46	2.39667	0.29	0.27	0.07	0.21	0.05	0.11	0.00898	0.0563267	1	0	0	0	0	0	0	0	0	0	0	0	0	0	0	0	0	0	0	0	0	0	0
ENSDARG00000003205	ngly1	ENSMUSG00000021785	Ngly1	ortholog_one2one	56.5217	55.914	0	51.13	0	0.000456038	15.13	17.33	19.28	17.2467	8.99	9.17	8.79	8.98333	6.56	9.19	11.65	9.13333	2.72	2.72	2.83	2.75667	0.000688448	17.2909	16.5622	15.781	16.7327	16.5917	11.9449	12.7811	10.9545	12.1381	12.4653	12.0506	12.0558	7.13674	7.23419	7.22058	6.55845	7.28353	7.87022	7.21728	9.96333	9.74026	8.90023
ENSDARG00000003206	chchd6a	ENSMUSG00000030086	Chchd6	ortholog_one2many	34.5133	28.5714	0	9.48	0	1.92482e-05	32.08	27.12	22.84	27.3467	31.2	34.68	35.36	33.7467	5.79	4.77	7.53	6.03	2.65	1.94	1.92	2.17	3.17894e-13	24.9418	24.6099	23.779	22.0611	23.8479	53.8178	52.9986	50.0265	48.8068	50.1197	48.0585	50.638	38.3553	36.4978	35.999	36.2811	36.1646	35.0249	36.3871	23.0164	21.7968	22.8312
ENSDARG00000003207	mterf3	ENSMUSG00000021519	Mterf3	ortholog_one2one	47.5124	46.3592	25	8.29	0	0.0477886	8.74	11.28	7.6	9.20667	6.71	8.13	6.64	7.16	0.92	3.9	4.03	2.95	1.87	2.1	2.16	2.04333	6.78734e-05	11.0992	10.6028	10.5614	11.4452	10.9272	8.50785	8.49608	9.16704	8.15773	9.71713	9.57825	8.93735	7.04437	6.64021	6.91114	6.70073	6.70767	6.78387	6.798	5.74383	5.8186	5.87109
ENSDARG00000003208	pomk	ENSMUSG00000037251	Pomk	ortholog_one2one	52.1614	51.8625	0	85.17	1	4.67611e-05	4.01	3.82	3.92	3.91667	1.11	0.78	0.79	0.893333	2.85	1.27	2.18	2.1	1.36	1.44	1.38	1.39333	6.49522e-11	10.4252	9.55634	10.6341	10.2857	10.2253	12.2939	10.5066	10.6779	11.0607	12.3722	10.9563	11.3112	14.2531	14.8348	13.3047	12.8699	14.2653	13.8275	13.8925	12.0144	11.73	13.5668
ENSDARG00000003210	ANO2 (1 of many)	ENSMUSG00000038115	Ano2	ortholog_one2many	61.4504	16.0679	50	4.6	0	0.608538	0	0	0	0	0	0	0	0	0.03	0.34	0	0.123333	0.06	0.03	0	0.03	0.00204755	0	0	0	0	0	0	0	0	0	0	0	0	0	0	0	0	0	0	0	0	0	0
ENSDARG00000003213	naa15a	ENSMUSG00000063273	Naa15	ortholog_one2many	80.2768	80.4624	100	1.13	1	8.41846e-05	13.68	12.69	12.46	12.9433	12.92	15.32	16.37	14.87	5.43	5.23	7.79	6.15	5.58	5.28	6.36	5.74	2.72683e-06	4.29808	3.74286	3.83929	3.81865	3.92472	2.66384	3.04134	2.74686	2.7353	2.78417	2.78836	2.79331	3.50384	3.75531	3.18095	3.7047	3.79461	3.82695	3.62773	2.83518	3.05778	3.64915
ENSDARG00000003216	anxa2a	ENSMUSG00000032231	Anxa2	ortholog_one2many	66.1721	65.7817	75	79.03	1	0.0488185	2.13	1.32	1.34	1.59667	437.86	485.54	446.21	456.537	1.92	3.02	0.68	1.87333	9.3	5.49	4.07	6.28667	7.4812e-12	93.3957	92.6852	95.3136	92.8763	93.5677	122.34	122.161	117.695	119.772	119.863	119.533	120.227	434.446	439.52	429.687	432.396	428.729	430.206	432.497	175.475	174.489	173.156
ENSDARG00000003217	urb2	ENSMUSG00000031976	Urb2	ortholog_one2one	36.6555	35.958	75	24.12	0	0.000418985	0.73	0.86	1.1	0.896667	1.96	1.7	1.18	1.61333	2.57	4.12	2.7	3.13	1	1.04	1.71	1.25	7.77189e-07	0.600447	0.510129	0.68671	0.509949	0.576809	1.20783	1.48235	1.10647	1.15255	1.11264	1.09918	1.1935	1.39996	1.28497	1.25134	1.31281	1.45146	1.23443	1.3225	1.1462	1.25232	1.02955
ENSDARG00000003219	bin2a	ENSMUSG00000098112	Bin2	ortholog_one2many	35.4212	32.4752	50	0	0	0.150381	0	0	0	0	0.63	0.62	0.97	0.74	0.04	0	0	0.0133333	2.22	0.65	0.23	1.03333	9.22194e-13	0	0	0	0	0	0.204939	0.377676	0.336368	0.454542	0.159173	0.275185	0.301314	1.85039	2.14394	2.30302	1.80106	2.04143	1.77592	1.98596	1.49194	1.36664	1.72398
ENSDARG00000003229	gdf9	ENSMUSG00000018238	Gdf9	ortholog_one2one	39.9522	37.8685	0	68.79	0	0.550856	0	0	0	0	0.01	0	0	0.00333333	0	0.52	0	0.173333	0.03	0.02	0	0.0166667	7.92263e-05	0.310575	0.397403	0.338672	0.193114	0.309941	0.0850969	0.0427698	0.186227	0.18874	0.148711	0.146913	0.133076	0	0	0	0	0	0	0	0	0	0
ENSDARG00000003235	nup88	ENSMUSG00000040667	Nup88	ortholog_one2one	64.0278	61.2218	25	39.63	0	0.146772	28.07	27.35	26.12	27.18	16.32	17.5	15.57	16.4633	5.05	6.32	22.42	11.2633	3.99	3.73	3.97	3.89667	7.93108e-06	16.0203	14.8221	14.8068	14.6292	15.0696	15.981	15.7796	16.2898	16.11	16.8945	15.9201	16.1625	9.67526	9.58229	9.80672	10.5935	10.2217	9.66881	9.92472	6.33027	6.66339	6.16971
ENSDARG00000003250	pik3cd	ENSMUSG00000039936	Pik3cd	ortholog_one2one	69.2012	68.6724	75	37.65	1	7.9816e-07	0.02	0.01	0.02	0.0166667	0.58	0.58	0.21	0.456667	9.38	7.8	7.51	8.23	0.28	0.6	0.2	0.36	0	5.45647	5.10086	4.55286	5.04446	5.03866	6.36487	5.91224	6.13357	6.41538	6.46625	5.60941	6.15029	3.45558	2.90832	3.42447	3.85519	3.61017	3.86277	3.51942	1.34897	1.57835	1.50987
ENSDARG00000003251	zbtb22b	ENSMUSG00000079605	Zbtb9	ortholog_many2many	21.8415	22.2222	0	29.6	0	0.00563231	1.09	1.33	1.25	1.22333	0.09	0.11	0.11	0.103333	0.28	0.54	0	0.273333	1.45	1.3	1.28	1.34333	0.285027	0.0322055	4.96801	0.105357	5.60707	2.67816	0.0617698	5.52611	0.0675888	0.0685008	0	0.0355468	0.959919	4.31674	0.0328575	4.72266	0	5.34541	5.27626	3.28232	1.17154	0	0
ENSDARG00000003269	clcn3	ENSMUSG00000004319	Clcn3	ortholog_one2one	87.7574	88.5681	50	79.46	1	0.000334342	23.26	27.46	25.32	25.3467	2.33	3.26	1.88	2.49	1.54	2.51	4.1	2.71667	3.72	3.04	3.78	3.51333	0	9.23227	8.74164	8.88175	9.12701	8.99567	5.50762	5.35308	5.22884	5.47343	4.98344	5.16205	5.28474	5.07337	4.98694	4.35791	4.34359	5.09291	4.96319	4.80299	5.63256	5.50916	5.48111
ENSDARG00000003270	dhps	ENSMUSG00000060038	Dhps	ortholog_one2one	76.7313	75.0677	50	51.93	0	0.000180862	73.29	70.31	66.89	70.1633	18.57	19.04	22.29	19.9667	2.66	5.63	11.16	6.48333	2.35	2.44	2.72	2.50333	2.40908e-11	21.1319	23.1919	22.2826	24.2181	22.7061	17.4765	17.3432	19.2857	18.3913	17.3283	17.8035	17.9381	23.2866	24.2497	23.9524	22.9491	22.7794	26.1922	23.9016	21.3709	23.0394	20.0191
ENSDARG00000003281	pik3ip1	ENSMUSG00000034614	Pik3ip1	ortholog_one2one	43.7736	43.9394	25	14.83	0	0.00726533	7.05	7.75	6.35	7.05	12.18	15.67	14.5	14.1167	4.47	3.78	1.38	3.21	3.21	2.71	3.02	2.98	0	15.7146	16.0174	15.4802	16.2964	15.8771	29.311	30.0938	27.8447	27.3231	27.6438	28.008	28.3707	99.657	100.414	98.3725	101.33	103.142	100.943	100.643	53.0143	52.6087	53.4074
ENSDARG00000003287	wdr12	ENSMUSG00000026019	Wdr12	ortholog_one2one	77.7251	77.5414	0	38.93	0	6.55049e-05	26.09	26.77	25.28	26.0467	8.51	8.94	7.63	8.36	5.34	9.06	11.19	8.53	1.4	2.08	2.39	1.95667	0	21.0523	20.2766	22.1185	20.923	21.0926	15.0062	15.2151	15.4075	15.407	16.1353	15.6823	15.4756	2.27907	2.5685	2.30636	2.74603	2.61913	2.73821	2.54288	5.06838	5.42904	5.05564
ENSDARG00000003290	dab1b	ENSMUSG00000028519	Dab1	ortholog_one2many	68.0887	71.8919	50	8.29	0	1	0	0	0	0	0	0	0	0	0	0	0	0	0.04	0.00661	0	0.0155367	7.85802e-14	0	0	0	0	0	0	0	0	0	0.0127311	0	0.00212184	0.307837	0.302266	0.184201	0.340488	0.27213	0.351724	0.293108	0	0	0
ENSDARG00000003293	sox9a	ENSMUSG00000000567	Sox9	ortholog_one2many	78.355	71.4004	50	64.61	0	3.48022e-05	3.18	4.18	4.3	3.88667	9.01	10.31	10.39	9.90333	0	0	0	0	0.11	0.1	0.05	0.0866667	0	23.9279	24.5727	24.0014	25.0173	24.3798	16.092	15.5875	16.6017	16.7794	15.5581	15.5624	16.0302	57.3327	56.5396	53.6215	56.301	56.5455	57.7708	56.3518	69.7846	69.1163	67.1817
ENSDARG00000003303	stc1	ENSMUSG00000014813	Stc1	ortholog_one2many	54.4	55.0607	50	1.05	0	0.000391071	7.01	7.75	8.26	7.67333	11.71	11.95	10.12	11.26	0.36	0.3	0.16	0.273333	0.07	0	0.02	0.03	1.58995e-10	0	0.0479191	0.0262526	0.0261965	0.0250921	0.253961	0.440941	0.277885	0.460857	0.295872	0.23915	0.328111	1.82607	2.11232	2.11264	1.85375	2.35726	1.40046	1.94375	0	0	0
ENSDARG00000003307	stx16	ENSMUSG00000027522	Stx16	ortholog_one2one	77.5244	73.0061	75	85.52	1	4.13129e-05	7.1	6.21	7.32	6.87667	3.01	3.17	2.86	3.01333	2.59	3.38	4.05	3.34	2.92	2.53	1.93	2.46	0.000304959	2.25164	2.53514	2.60415	2.27686	2.41695	4.97295	4.49455	4.1288	4.23289	4.7518	4.54372	4.52079	3.49753	3.36462	3.33519	3.21504	2.96023	3.10512	3.24629	3.43475	3.54064	3.35505
ENSDARG00000003308	emc2	ENSMUSG00000022337	Emc2	ortholog_one2one	83.5017	83.5017	100	95.56	1	0.000105788	151.49	153.43	146.75	150.557	73.16	80.21	78.96	77.4433	13.68	16.84	27.84	19.4533	12.49	12.37	11.48	12.1133	8.52213e-13	56.0932	58.2744	53.8278	53.9492	55.5361	31.9982	33.4903	32.4303	34.3304	31.5374	32.4343	32.7035	58.2084	55.678	58.0827	60.4728	64.0416	63.4995	59.9972	30.5575	30.7872	32.5311
ENSDARG00000003311	pank2	ENSMUSG00000018846	Pank3	ortholog_one2many	65.6751	77.5676	25	10.04	0	0.00155599	64.24	66.01	67.47	65.9067	20.17	17.37	18.88	18.8067	22.26	19.87	13.98	18.7033	4.55	5.39	4.52	4.82	0.0348174	2.79764	2.67486	3.06407	3.15058	2.92179	1.8511	1.88428	2.0383	2.16975	2.10199	2.29232	2.05629	2.32297	2.76703	2.77892	2.45704	2.36324	2.24805	2.48954	3.12432	3.10724	2.75955
ENSDARG00000003313	si:ch73-70c5.1	ENSMUSG00000006154	Eps8l1	ortholog_one2many	37.3563	27.2346	0	2.73	0	0.00272922	0	0	0	0	0	0	0	0	0	0	0	0	0	0	0	0	0	1.79147	2.06521	1.80703	1.85191	1.8789	1.80391	1.84208	1.58221	1.44479	1.80138	1.59834	1.67879	6.34436	6.97587	6.65379	6.72561	7.52275	6.85894	6.84689	2.69888	3.17512	3.04528
ENSDARG00000003320	fam91a1	ENSMUSG00000037119	Fam91a1	ortholog_one2one	79.1817	78.6141	0	88.38	1	0.00170493	11.74	13.93	12.99	12.8867	5.13	4.87	5.27	5.09	3.5	2.24	6.26	4	5.38	5.51	5.61	5.5	3.19622e-06	31.0202	29.2447	30.3478	28.5386	29.7879	10.8385	11.6367	12.4147	11.7127	12.1436	12.4037	11.8583	19.6554	20.3955	19.7877	18.8845	20.3294	20.9922	20.0074	23.4855	22.4081	23.833
ENSDARG00000003326	cacng5a	ENSMUSG00000040373	Cacng5	ortholog_one2many	85.8131	90.1818	50	20.49	0	0.59862	0.17	0.21	0.22	0.2	0	0	0	0	0	0.24	0	0.08	0.03	0.13	0.22	0.126667	0	0.211528	0.304081	0.205036	0.281322	0.250492	30.1351	29.1591	30.4338	32.2692	30.8544	29.4177	30.3782	0.170946	0.167853	0.379933	0.216089	0.196453	0.0837075	0.202497	0.803154	0.721462	0.568814
ENSDARG00000003328	slf2	ENSMUSG00000036097	Slf2	ortholog_one2one	24.3578	23.6457	25	0	0	0.00331347	1.89	2.06	1.81	1.92	1.29	1.88	1.18	1.45	3.26	0.98	1.59	1.94333	0.81	0.85	0.55	0.736667	0	4.32218	4.41886	4.42756	3.9763	4.28623	3.73046	3.81299	3.95819	4.23447	4.79973	4.5393	4.17919	3.10285	3.40748	2.82803	3.25133	3.29995	3.00099	3.14844	3.2485	3.7333	3.90944
ENSDARG00000003344	trpc2b	ENSMUSG00000070425	Xntrpc	ortholog_many2many	47.41	42.7215	50	67.68	0	0.550856	0	0	0	0	0	0	0.01	0.00333333	0	0	0.07	0.0233333	0.00623	0.00481	0.00551	0.00551667	1.56837e-09	0.142958	0	0.225176	0	0.0920334	0.31989	0	0.383361	0.354748	0.159721	0.280514	0.249706	0.14854	0.437555	0.110045	0.32859	0.113803	0.169717	0.218042	0	0.0696554	0.128141
ENSDARG00000003373	commd2	ENSMUSG00000036513	Commd2	ortholog_one2one	75.3769	75.3769	50	99.92	1	0.000672509	36.85	32.84	28.73	32.8067	23.41	21.48	24.83	23.24	14.59	15.81	8.41	12.9367	3.47	3.59	4.05	3.70333	2.62022e-09	9.27773	9.88328	9.99841	9.97707	9.78412	9.34085	9.75663	7.70843	8.82517	9.11931	9.7598	9.08503	10.2902	9.60434	10.5555	11.4442	10.3637	9.69005	10.3247	8.90749	8.79912	8.62274
ENSDARG00000003375	gng12a	ENSMUSG00000036402	Gng12	ortholog_one2many	72.3684	76.3889	25	25	0	0.000142736	2.63	2.49	3.06	2.72667	27.41	25.29	24.84	25.8467	6.73	8.59	6.91	7.41	7.65	7.64	7.64	7.64333	7.34747e-13	13.1344	13.546	12.9715	12.8194	13.1178	5.04565	5.34755	5.52098	5.73739	5.32458	5.65997	5.43935	13.1521	14.081	12.9206	14.5471	15.0235	16.0003	14.2875	28.4736	28.7777	29.3291
ENSDARG00000003380	PAOX	ENSMUSG00000025464	Paox	ortholog_one2one	49.6078	50.1984	0	12.67	0	0.000149426	15.46	16.67	19.47	17.2	5.55	5.23	5.31	5.36333	5.16	8.96	6.14	6.75333	2.05	2.97	2.42	2.48	5.04495e-15	1.89147	1.79105	2.04256	2.17808	1.97579	0.563544	0.407154	0.616632	0.644483	0.677063	0.648607	0.592914	2.02257	1.64873	1.97196	2.13157	2.10508	1.8531	1.9555	1.11336	0.765024	0.994683
ENSDARG00000003382	cwc25	ENSMUSG00000018541	Cwc25	ortholog_one2one	56.2341	53.125	0	5.19	0	2.06601e-06	19.96	21.01	20.07	20.3467	23.27	22.44	23.54	23.0833	5.54	4.39	6.45	5.46	4.41	4.17	3.9	4.16	7.36621e-13	15.6397	16.1152	15.0322	14.9419	15.4322	13.0659	11.6038	11.9202	11.5879	12.1936	12.4005	12.1287	6.94858	6.96837	7.14515	6.74282	6.87807	6.49956	6.86376	11.7358	11.1829	10.872
ENSDARG00000003383	asb8	ENSMUSG00000048175	Asb8	ortholog_one2one	78.5467	78.8194	0	100	1	3.314e-07	43.91	41.95	38.42	41.4267	16.65	15.85	19.16	17.22	10.79	10.47	10.87	10.71	3.48	2.96	3.41	3.28333	1.17734e-07	63.7881	60.0972	61.5267	63.5517	62.2409	58.2322	56.6968	56.9694	55.5511	55.3098	57.7362	56.7493	27.7004	28.5724	27.5877	26.5133	27.0564	27.7433	27.5289	21.1441	21.8893	22.4935
ENSDARG00000003398	rbpja	ENSMUSG00000039191	Rbpj	ortholog_one2many	88.3064	83.27	25	50.94	0	0.000414247	1.87	2.06	2.5	2.14333	4.61	3.98	3.56	4.05	3.38	6.1	7.74	5.74	2.14	1.66	2.07	1.95667	1.78155e-05	1.56091	1.25864	1.36667	1.50012	1.42158	1.9558	1.80123	1.614	1.41768	1.83304	1.92406	1.75764	2.15459	2.18534	2.15751	2.17361	2.28561	2.7458	2.28374	1.75831	1.86111	1.62818
ENSDARG00000003399	fgf8a	ENSMUSG00000025219	Fgf8	ortholog_one2many	69.0476	54.1045	25	42.89	0	0.678236	0	0	0	0	4.55	4.68	5.26	4.83	0	0.13	0	0.0433333	0	0	0	0	1	0	0	0	0	0	0	0	0	0	0	0	0	0	0	0	0	0	0	0	0	0	0
ENSDARG00000003403	tenm1	ENSMUSG00000016150	Tenm1	ortholog_one2one	65.4539	65.2142	25	0.64	0	0.000659391	0.06	0.1	0.08	0.08	1.6	1.63	1.57	1.6	0.12	0.48	0.24	0.28	0.95	1.49	0.76	1.06667	0.092601	0	0	0.0055369	0	0.00138422	0	0.00489466	0	0	0	0	0.000815776	0.00527581	0.00518033	0	0	0	0	0.00174269	0	0	0
ENSDARG00000003411	foxa2	ENSMUSG00000037025	Foxa2	ortholog_one2one	73.8386	64.9462	0	77.5	1	2.2167e-07	0	0	0	0	0	0.01	0	0.00333333	0	0	0	0	23.46	26.9	29.84	26.7333	0.000199706	0	0	0	0	0	0	0	0	0	0	0	0	0	0	0	0	0	0	0	0	0	0
ENSDARG00000003414	capslb	ENSMUSG00000039676	Capsl	ortholog_one2one	64.1129	76.4423	75	77.6	1	1.57056e-07	24.22	22.52	23.55	23.43	0	0.05	0	0.0166667	0.08	0.8	0.65	0.51	0.02	0.03	0	0.0166667	7.50289e-05	0.0952547	0.0947998	0.103872	0.103651	0.0993944	0.548093	0.183648	0.299863	0.506515	1.27709	0.630823	0.574339	0.593846	1.1662	1.31984	0.547361	0.568712	0.565424	0.793563	1.26003	0.730995	0.76844
ENSDARG00000003420	chrna5	ENSMUSG00000035594	Chrna5	ortholog_one2one	69.9571	74.4292	0	11.84	0	0.00156235	0	0	0	0	0	0	0	0	2.06	1.05	1.36	1.49	0.09	0.09	0.13	0.103333	1.0702e-07	0.0329112	0.0982622	0.358887	0.0716242	0.140421	1.76746	1.93528	1.86489	1.61004	2.09591	1.96159	1.87253	1.19687	1.44383	1.44405	1.43729	1.61125	1.7973	1.48843	0.217674	0.324726	0.189644
ENSDARG00000003421	igf2bp2a	ENSMUSG00000033581	Igf2bp2	ortholog_one2many	69.0367	50.8446	0	100	1	5.40141e-06	2.19	2.52	3.03	2.58	0	0.05	0.03	0.0266667	0.49	0.44	0.93	0.62	1.41	0.76	1.2	1.12333	1.93482e-12	8.59283	8.42603	7.84067	7.87894	8.18462	8.67674	8.23462	8.30073	8.76215	8.8945	8.71721	8.59766	8.88899	9.19223	8.15628	7.85673	9.17417	8.76108	8.67158	10.0154	9.64198	9.94657
ENSDARG00000003429	hnrpdl	ENSMUSG00000029328	Hnrnpdl	ortholog_one2many	79.0541	55.7143	75	58.23	1	5.85029e-08	671.64	680.56	647.92	666.707	330.69	340.19	330.75	333.877	32.09	36.06	39.33	35.8267	43.38	38.92	41.29	41.1967	0	16.7579	17.7947	18.0904	16.6272	17.3175	34.7601	35.3015	36.3665	35.0472	34.98	34.6809	35.1893	14.9442	13.8723	14.1883	15.0462	14.6281	13.9884	14.4446	13.7102	13.6352	14.6354
ENSDARG00000003444	dhrs7	ENSMUSG00000109482	Gm4756	ortholog_one2many	50.5917	51.0448	100	29.32	1	2.73091e-07	2.49	5.43	5.91	4.61	8.92	8.08	9.67	8.89	1.32	3.43	1.79	2.18	22.4	21.9	24.07	22.79	0.0229667	0	0	0	0	0	0	0	0	0	0	0	0	0	0	0	0	0	0	0	0	0	0
ENSDARG00000003446	ippk	ENSMUSG00000021385	Ippk	ortholog_one2one	56.7288	56.0327	50	55.65	0	0.00164703	1.6	0.95	0.86	1.13667	1.11	1.2	1.05	1.12	2.91	6.03	4.08	4.34	1.63	1.31	1.13	1.35667	7.34992e-14	12.0105	12.05	12.0705	11.7975	11.9821	9.6502	9.98202	10.423	10.1494	11.2428	11.1427	10.4317	14.8067	13.6446	13.793	14.1389	12.6361	14.9523	13.9953	23.5806	22.2417	22.7076
ENSDARG00000003449	pde10a	ENSMUSG00000023868	Pde10a	ortholog_one2one	77.5801	82.1608	50	89.78	1	0.0229603	0.04	0.06	0.06	0.0533333	1.38	1.68	1.8	1.62	1.38	1.14	2.43	1.65	0.14	0.18	0.06	0.126667	3.60575e-11	0	0	0	0	0	0.658512	0.723994	0.59295	0.753091	0.687271	0.600012	0.669305	0.170939	0.197035	0.25603	0.221951	0.213527	0.161342	0.203471	0.0867322	0.0548914	0.0577031
ENSDARG00000003462	fech	ENSMUSG00000024588	Fech	ortholog_one2one	70.4156	68.2464	50	39.71	0	0.000396399	0.97	1.08	0.68	0.91	2.14	1.91	1.8	1.95	1.13	0.41	1.85	1.13	0.59	0.55	0.32	0.486667	7.06909e-06	123.409	119.667	122.448	119.314	121.21	47.4528	45.3641	47.1643	46.0829	49.7313	47.3128	47.1847	63.614	62.2726	59.8963	57.5456	64.13	64.2754	61.9556	73.9597	72.7039	73.8149
ENSDARG00000003469	neurod4	ENSMUSG00000048015	Neurod4	ortholog_one2one	56.3218	59.3939	0	74.63	1	0.472078	0	0	0	0	0.68	0.85	1.02	0.85	0.05	0.6	0	0.216667	0	0	0	0	0	0	0	0	0	0	0	0	0	0	0	0	0	0	0	0	0	0	0	0	0	0	0
ENSDARG00000003475	sult1st5	ENSMUSG00000023122	Sult1c2	ortholog_many2many	46.4286	48.3108	25	0	0	5.77631e-05	5.02	3.67	2.77	3.82	4.54	3.59	2.78	3.63667	0.61	0.85	1.18	0.88	4.02	5.39	5.42	4.94333	0.000687688	0	0	0	0	0	0	0	0	0	0	0	0	0	0	0	0	0	0	0	0	0	0
ENSDARG00000003487	nup93	ENSMUSG00000032939	Nup93	ortholog_one2one	82.8049	82.906	75	100	1	0.00324051	16.89	19.84	18.94	18.5567	11.95	14.04	13.39	13.1267	5.55	2.38	6.9	4.94333	2.78	2.58	2.91	2.75667	1.18183e-05	14.9768	14.0651	13.4677	12.9286	13.8596	11.2443	10.8506	12.0739	12.4363	10.6197	12.5274	11.6254	8.90165	9.56994	9.06172	9.23494	8.43778	8.94578	9.0253	11.8564	10.9346	11.8551
ENSDARG00000003495	madd	ENSMUSG00000040687	Madd	ortholog_one2one	72.5	74.8617	25	95.29	1	4.48448e-05	16.19	15.94	14.42	15.5167	2.51	2.49	2.67	2.55667	0.3	0.99	1.11	0.8	1.35	1.15	0.77	1.09	0	24.427	23.6984	21.8135	22.8892	23.207	8.75953	8.49916	8.84583	8.34291	8.37684	8.76814	8.59874	2.80292	2.83313	2.4964	2.37075	2.5106	2.09576	2.51826	5.11637	4.82745	5.00615
ENSDARG00000003512	anks1b	ENSMUSG00000058589	Anks1b	ortholog_one2one	29.7656	74.7059	50	61.8	0	0.00209021	1.15	2.32	2.22	1.89667	2.05	2.44	3.13	2.54	0.34	0.24	0.08	0.22	0.76	1.11	0.9	0.923333	0	1.50382	1.42861	1.88382	1.63637	1.61315	0.34564	0.353428	0.339077	0.304	0.49988	0.432106	0.379022	0.103309	0.101439	0.0717518	0.0785579	0.0816222	0.0811502	0.0863049	1.37	1.58732	1.36785
ENSDARG00000003517	impa1	ENSMUSG00000027531	Impa1	ortholog_one2one	62.766	63.8989	0	90.49	1	2.32546e-06	21.61	19.38	22.48	21.1567	13.93	15.12	14.54	14.53	12.62	10.92	10.6	11.38	2.65	2.37	2.8	2.60667	1.2181e-07	21.9767	22.383	20.8744	21.2446	21.6197	15.4013	13.724	15.7392	14.7001	15.6654	15.4577	15.1146	19.7351	19.8683	19.6345	19.7712	19.3154	19.6956	19.67	15.8398	16.9342	16.5601
ENSDARG00000003519	aprt	ENSMUSG00000006589	Aprt	ortholog_one2one	54.2373	53.3333	75	41.87	1	0.000573482	7.31	10.19	9.6	9.03333	9.42	10.23	8.58	9.41	8.1	9.44	11.21	9.58333	2.49	3.27	3.49	3.08333	8.1907e-08	18.5217	18.019	18.2684	23.8907	19.6749	13.4713	16.5506	13.7577	12.3941	12.7881	12.7483	13.6183	57.0861	55.8406	61.3951	59.0751	54.5457	49.1655	56.1847	34.4106	34.2224	32.6177
ENSDARG00000003520	tbc1d14	ENSMUSG00000029192	Tbc1d14	ortholog_one2one	62.166	61.9048	75	59.36	1	7.50294e-06	107.75	105.64	104.11	105.833	5.61	6.26	5.82	5.89667	8.1	7.08	5.39	6.85667	0.75	0.78	0.61	0.713333	5.12588e-12	15.233	15.6086	14.2252	14.515	14.8954	5.32496	5.17542	5.57578	5.85633	5.31015	5.37785	5.43675	4.62322	4.32383	3.81075	3.84576	3.94088	4.13637	4.11347	7.38758	7.13553	7.70234
ENSDARG00000003523	itln3	ENSMUSG00000038209	Itln1	ortholog_one2many	53.5385	55.5911	0	0	0	0.000101176	0	0	0	0	0	0	0	0	0	0	0	0	166.71	293.32	233.41	231.147	0.116615	0	0	0	0	0	0	0	0	0	0	0	0	0	0	0	0	0	0	0	0	0	0
ENSDARG00000003526	psma5	ENSMUSG00000068749	Psma5	ortholog_one2one	96.2656	96.2656	75	11.33	1	0.000116782	95.01	97.38	95.38	95.9233	105.78	109.4	100.95	105.377	32.01	42.35	48.01	40.79	15.33	17.27	18.99	17.1967	3.49147e-10	78.9239	76.2387	74.3856	82.5402	78.0221	71.6317	72.2016	64.3501	62.6794	64.6285	63.7717	66.5438	83.1399	83.0966	80.0243	83.4914	82.5941	79.9299	82.046	70.5325	74.7833	74.6047
ENSDARG00000003527	mak16	ENSMUSG00000031578	Mak16	ortholog_one2one	74.4262	76.6892	25	46.14	0	0.0152626	14.88	13.55	17.5	15.31	45.97	37.44	39.66	41.0233	17.3	29.42	52.11	32.9433	3.02	2.75	3.54	3.10333	5.07507e-05	8.65291	12.2965	8.73354	13.6198	10.8257	7.3332	8.962	7.93956	7.27626	6.38507	6.48554	7.39694	10.2453	7.39095	11.06	7.03047	10.909	9.69923	9.38916	9.49399	7.72132	6.58623
ENSDARG00000003531	tcea1	ENSMUSG00000033813	Tcea1	ortholog_one2one	72.8155	72.1154	50	98.12	1	2.00764e-05	29.89	28	27.77	28.5533	20.41	20.83	20.29	20.51	14.09	21.2	19.78	18.3567	3.64	3.61	3.81	3.68667	3.57419e-08	21.4749	21.9669	21.0076	21.5802	21.5074	10.8557	10.4803	13.1007	12.5469	11.8463	11.1756	11.6676	15.8274	18.1616	16.7952	17.6434	18.5456	16.8782	17.3086	17.5815	17.0924	18.381
ENSDARG00000003533	col8a1b	ENSMUSG00000068196	Col8a1	ortholog_one2many	65.6207	64.6505	0	59.52	0	0.00107585	0	0	0	0	10.92	9.3	9.41	9.87667	0	0	0	0	0.07	0.1	0.01	0.06	3.24224e-06	0.246976	0.245797	0.250083	0.191961	0.233704	0.913559	0.731248	1.01813	0.656645	0.611001	0.720441	0.775171	4.96744	4.75155	3.89057	4.58197	4.55005	4.25148	4.49884	4.18097	4.91236	4.06614
ENSDARG00000003544	adarb1b	ENSMUSG00000020262	Adarb1	ortholog_one2many	77.5393	76.2307	25	14.74	0	0.000513889	0.97	1.31	1.02	1.1	0.19	0.27	0.17	0.21	0	0.04	0.32	0.12	0.72	0.91	0.21	0.613333	6.30553e-14	0.519625	0.572836	0.645093	0.713307	0.612715	2.70625	2.90528	2.86891	3.16268	2.85812	2.65591	2.85952	0.232579	0.26915	0.30461	0.275623	0.200462	0.265737	0.258027	0.370116	0.219102	0.313243
ENSDARG00000003564	dohh	ENSMUSG00000113262	Dohh	ortholog_one2many	27.2131	37.0536	50	70.41	0	0.01502	52.68	52.84	49.61	51.71	36.39	42.7	37.78	38.9567	14.84	24.33	41.15	26.7733	8.7	7.54	9.56	8.6
ENSDARG00000003570	hsp90b1	ENSMUSG00000020048	Hsp90b1	ortholog_one2one	81.1344	82.0449	25	97.7	1	0.0317989	40.84	38.09	37.51	38.8133	70.82	72.95	73.95	72.5733	53.33	32.08	72	52.47	112.94	30.51	86.22	76.5567	0.000875308	262.399	267.329	260.695	260.99	262.853	225.577	216.323	220.656	221.732	223.652	226.819	222.46	187.561	187.884	197.927	196.616	195.986	200.266	194.373	177.576	179.3	176.817
ENSDARG00000003573	dctn5	ENSMUSG00000030868	Dctn5	ortholog_one2one	95.0549	95.0549	0	58.94	0	0.000749228	60.15	61.62	67.66	63.1433	55.3	55.49	56.44	55.7433	20.25	24.06	36.52	26.9433	2.63	3.84	2.77	3.08	8.1093e-11	39.2896	35.2087	36.2784	36.275	36.7629	22.9986	22.0689	23.3804	23.6235	23.5256	23.0909	23.1146	32.8358	36.6492	33.9362	32.0573	34.2014	33.6402	33.8867	25.4236	23.7928	23.2867
ENSDARG00000003576	klhl32	ENSMUSG00000040387	Klhl32	ortholog_one2one	79.3548	79.3548	50	93.76	1	0.00153625	6.31	6.25	6.62	6.39333	4.33	4.41	3.97	4.23667	0.85	0.87	0.51	0.743333	2.34	0.51	0.42	1.09	0	2.85555	2.89921	2.64932	2.6186	2.75567	2.34094	2.53071	2.58563	2.43684	2.44425	2.51636	2.47579	5.37181	5.41556	5.6903	5.98127	5.2384	6.60241	5.71662	3.96008	4.31712	3.78188
ENSDARG00000003584	pla2g7	ENSMUSG00000023913	Pla2g7	ortholog_one2one	43.6937	44.0909	50	11.42	0	6.19031e-06	16.35	15.25	12.99	14.8633	18.32	16.03	16.99	17.1133	6.74	7.84	5.11	6.56333	12.46	13.15	12.59	12.7333	0	41.814	43.9605	42.6879	43.9469	43.1023	32.8113	31.6065	32.094	30.9766	30.1858	33.6897	31.894	175.914	174.408	182.88	177.319	186.717	187.295	180.755	123.883	122.389	120.794
ENSDARG00000003592	surf1	ENSMUSG00000015790	Surf1	ortholog_one2one	59.2233	59.8039	50	42.74	0	4.96087e-05	41.43	37.63	36.45	38.5033	37.37	36.1	34.27	35.9133	10.24	15.76	15.66	13.8867	5.47	6.78	6.14	6.13	9.42766e-11	28.5291	28.3929	26.8501	29.981	28.4383	27.2607	23.4879	25.6754	24.2178	23.6043	22.7515	24.4996	28.2545	30.208	30.3892	29.0065	27.7441	27.6447	28.8745	34.6784	35.0523	36.4923
ENSDARG00000003599	rpl3	ENSMUSG00000060036	Rpl3	ortholog_one2one	89.33	89.33	0	61.87	0	5.49682e-05	355.57	376.53	337.28	356.46	800.59	919.66	828.75	849.667	433.79	397.67	478.48	436.647	786.68	658.07	804.57	749.773	0.475586	50.7615	51.0078	51.0692	53.1294	51.492	36.323	36.1498	36.895	37.2085	38.0566	37.15	36.9638	85.9149	82.0019	84.8658	84.4025	85.3834	85.1984	84.6278	67.1024	64.9934	63.628
ENSDARG00000003607	nr2f6a	ENSMUSG00000002393	Nr2f6	ortholog_one2many	72.3881	74.6154	25	100	1	4.35683e-09	19.14	21.79	17.93	19.62	9.91	10.89	9.87	10.2233	6.24	4.46	5.85	5.51667	2.97	2.92	2.8	2.89667	5.45258e-07	22.3843	19.5115	21.7411	21.3003	21.2343	17.2658	16.0452	18.2267	15.8704	14.9514	18.0381	16.7329	29.6301	29.4945	28.6366	29.44	28.6044	29.4073	29.2021	28.8705	30.6666	29.7309
ENSDARG00000003615	slc26a3.2	ENSMUSG00000001225	Slc26a3	ortholog_one2many	56.8241	57.1995	50	20.56	0	0.000222787	0	0.01	0	0.00333333	0.16	0.1	0.03	0.0966667	0	0	0	0	14.96	15.36	8.7	13.0067	0.00378731	0	0	0	0	0	0	0	0	0	0	0	0	0	0	0	0	0	0	0	0	0	0
ENSDARG00000003616	arih1	ENSMUSG00000025234	Arih1	ortholog_one2many	90.4315	86.8468	0	80.9	1	0.00589463	14.82	16.3	14.91	15.3433	10.77	12.73	12	11.8333	5.45	7.64	9.1	7.39667	4.87	4.33	5.14	4.78	0.00361615	1.7772	1.40799	1.84873	1.59033	1.65606	1.5922	1.37506	1.65631	1.62892	1.6982	1.60024	1.59182	2.06527	1.95632	1.79555	1.86778	2.19194	1.87389	1.95846	2.03639	2.03807	2.47934
ENSDARG00000003631	clockb	ENSMUSG00000029238	Clock	ortholog_one2many	67.4888	70.4094	0	19.27	0	0.000201962	3.74	2.79	3.14	3.22333	3.05	3.52	1.95	2.84	0.93	2.26	0.33	1.17333	1.97	1.62	1.88	1.82333	4.37631e-05	3.09188	3.07058	3.09959	3.20012	3.11554	2.78883	2.87927	2.962	2.89027	2.94103	3.14457	2.93433	2.3873	2.51822	2.69839	2.41418	2.79054	2.5406	2.55821	1.79459	1.87833	1.98968
ENSDARG00000003641	tfg	ENSMUSG00000022757	Tfg	ortholog_one2one	66.9192	66.7506	50	94.01	1	0.00223645	563.87	592.96	552.87	569.9	129.41	133.77	129.54	130.907	10.11	7.14	20.78	12.6767	24.55	25.64	20.41	23.5333	1.02458e-06	108.864	107.484	112.969	107.808	109.281	36.346	38.9227	40.43	40.8501	41.246	37.8399	39.2725	29.1674	26.6741	27.1013	28.4656	31.313	31.1319	28.9756	32.9373	31.4641	30.7651
ENSDARG00000003642	zfyve19	ENSMUSG00000068580	Zfyve19	ortholog_one2one	48.2673	50.1285	0	54.87	0	0.000167054	11.67	10.68	10.19	10.8467	5.71	4.87	5.73	5.43667	1.08	2.03	2.2	1.77	8.66	12.16	8.47	9.76333	8.00838e-07	12.9837	12.9217	13.5848	13.857	13.3368	20.4159	19.1077	19.9281	19.9026	18.8673	20.3503	19.762	12.8579	13.1336	12.0829	12.6945	12.0988	12.8505	12.6197	9.67381	9.2567	9.53944
ENSDARG00000003655	tmem59l	ENSMUSG00000035964	Tmem59l	ortholog_one2one	33.6283	33.8279	50	5.33	0	0.000202811	70.17	67.36	74.11	70.5467	6.31	6.04	6.12	6.15667	2.14	2.95	2.12	2.40333	0.23	0.24	0.29	0.253333	0	21.6201	23.2965	20.8581	19.2216	21.2491	19.2786	18.8565	17.9106	17.5184	16.83	16.9853	17.8966	4.33523	3.98036	4.75502	4.48369	4.27037	3.79538	4.27001	7.94417	7.5443	7.11894
ENSDARG00000003675	cryl1	ENSMUSG00000021947	Cryl1	ortholog_one2one	56.8254	56.1129	100	33.32	1	0.000131701	20.3	18.86	20.15	19.77	14.03	14.5	13.31	13.9467	10.49	9.75	10.37	10.2033	13.72	11.05	17.05	13.94	0	36.9391	37.4623	35.8905	36.1616	36.6134	12.3802	12.0133	13.2111	11.4863	11.1388	11.5684	11.9663	146.62	145.075	139.763	143.002	144.23	138.768	142.91	63.6852	61.165	60.6891
ENSDARG00000003680	runx1t1	ENSMUSG00000006586	Runx1t1	ortholog_one2one	88.3249	86.4238	100	100	1	1.53702e-06	0.64	0.38	0.44	0.486667	0.46	0.97	0.41	0.613333	0	0.37	0.02	0.13	0.14	0.18	0.29	0.203333	6.23188e-05	4.27968	4.2367	4.19771	4.55834	4.31811	5.81969	5.98094	5.17989	5.88795	5.99585	5.71091	5.76254	0.199988	0.20792	0.379115	0.312283	0.324464	0.295705	0.286579	1.49766	1.2164	1.23956
ENSDARG00000003681	eif5	ENSMUSG00000021282	Eif5	ortholog_one2one	75.2914	75.2914	25	90.54	1	9.24482e-06	97.51	104.31	99.34	100.387	127.63	146.94	138.01	137.527	25.34	31.24	41.41	32.6633	27.14	25.46	35.06	29.22	5.03411e-08	96.1243	94.009	96.8841	93.6592	95.1691	93.7148	93.0472	95.7908	93.3077	96.4875	99.6313	95.3299	135.038	128.7	131.026	129.241	136.296	135.586	132.648	109.556	112.12	109.245
ENSDARG00000003684	obsl1a	ENSMUSG00000055632	Hmcn2	ortholog_one2one	15.5035	6.09804	0	0	0	0.550856	0	0	0	0	0.69	0.57	0.48	0.58	0	0	0	0	0.02	0.00539	0.02	0.01513	1.97931e-09	0	0	0	0	0	0	0	0	0	0	0	0	0	0	0	0	0	0.0133115	0.00221859	0	0	0
ENSDARG00000003693	hars	ENSMUSG00000019143	Hars2	ortholog_one2many	58.8694	59.802	50	71.64	0	0.00343956	83.84	85.35	74.13	81.1067	37.15	46.17	37.42	40.2467	9.87	16.34	23.68	16.63	11.55	12.1	17.66	13.77	1.73921e-05	13.7936	14.4822	14.2607	14.7115	14.312	11.4306	11.4088	11.5793	12.721	10.823	11.4824	11.5742	13.4351	14.1158	14.3706	14.2792	14.1573	15.3255	14.2806	9.4016	10.4122	10.0233
ENSDARG00000003695	vdac3	ENSMUSG00000008892	Vdac3	ortholog_one2many	65.4088	73.4982	25	3.32	0	2.32357e-05	46.85	51.97	49.1	49.3067	125.94	141.99	128.08	132.003	19.18	19.27	12.73	17.06	74.61	56.23	71.95	67.5967	1.9318e-07	178.689	179.87	184.267	179.919	180.686	206.701	207.776	213.423	209.902	208.65	215.214	210.278	166.374	168.982	174.002	165.162	175.876	169.264	169.944	162.236	165.084	158.817
ENSDARG00000003699	atp7a	ENSMUSG00000033792	Atp7a	ortholog_one2one	64.2	64.5442	0	90.26	1	0.0035607	1.14	1.15	1.25	1.18	0.42	0.41	0.38	0.403333	1.14	3.84	3.02	2.66667	1.32	1.46	0.93	1.23667	9.92638e-14	0.928554	1.08841	0.877552	0.864452	0.939741	0.702488	0.795653	0.996018	0.943624	0.795366	0.87685	0.851667	1.37218	1.51576	1.44146	1.20943	1.47837	1.42082	1.40634	1.64909	1.50434	1.59329
ENSDARG00000003701	cldng	ENSMUSG00000047501	Cldn4	ortholog_one2many	63.2558	64.7619	0	0	0	0.000242502	0	0	0	0	0.47	0.91	0.36	0.58	0	0	0	0	0.14	0.15	0.14	0.143333	5.60815e-06	0.396965	0.345685	0.324659	0.485948	0.388314	0.856546	1.0045	0.937236	0.738798	1.05334	0.766761	0.892864	3.96999	4.55626	5.61489	5.13242	4.68085	5.18396	4.85639	1.80504	1.79517	1.25808
ENSDARG00000003732	mitfa	ENSMUSG00000035158	Mitf	ortholog_one2many	65.6	62.3574	100	56.81	1	0.00102284	0	0	0	0	0.09	0.03	0.11	0.0766667	4.62	2.08	3.4	3.36667	0.05	0.03	0.00859	0.02953	0.000537661	0.0727171	0.217109	0.19031	0.221554	0.175423	0.320782	0.35049	0.244175	0.24747	0.324975	0.304993	0.298814	0.876457	0.905108	0.906804	1.15327	1.19826	0.915081	0.992498	0.849676	0.813142	1.03916
ENSDARG00000003749	polb	ENSMUSG00000031536	Polb	ortholog_one2one	79.941	80.8955	0	96.33	1	1.23771e-05	25.39	28.45	28.99	27.61	7.42	7.56	6.19	7.05667	3.64	3.93	4.63	4.06667	1.1	1.03	1.08	1.07	0	16.81	16.5477	18.1563	17.1967	17.1777	17.7218	18.1006	18.3834	17.4639	17.1202	18.0997	17.8149	13.3078	12.3203	14.0226	13.1685	13.8733	13.5488	13.3735	11.7232	10.606	9.19882
ENSDARG00000003750	pfas	ENSMUSG00000020899	Pfas	ortholog_one2one	63.5464	62.4533	0	42.11	0	0.0243166	0.27	0.14	0.2	0.203333	0.39	0.47	0.22	0.36	0.26	0.69	1.45	0.8	1.85	1.89	2.03	1.92333	0.720896	0.079513	0.135657	0.0867066	0.111242	0.10328	0.490195	0.350396	0.441018	0.338247	0.380728	0.501499	0.417014	0.342275	0.254957	0.275431	0.195816	0.366218	0.269704	0.284067	0.751282	0.510568	0.706902
ENSDARG00000003751	lats1	ENSMUSG00000040021	Lats1	ortholog_one2one	66.1049	62.5332	0	62.08	0	1.81963e-07	4.33	4.18	3.87	4.12667	2.54	3.07	3.36	2.99	0.39	0.25	0.37	0.336667	1.2	0.84	1.03	1.02333	9.27792e-09	4.30805	4.14005	3.97092	3.6535	4.01813	3.19621	3.42702	3.18643	3.41322	3.37889	3.77402	3.39597	2.69346	2.74546	2.72233	2.99333	2.77108	2.66713	2.76547	3.86442	4.2628	4.39581
ENSDARG00000003754	tspan2a	ENSMUSG00000027858	Tspan2	ortholog_one2many	57.346	54.7511	75	0.36	1	2.03715e-07	9.53	10.79	14.28	11.5333	6.01	5.53	5.8	5.78	11	8.78	8.81	9.53	0.3	0.55	0.12	0.323333	0	3.39219	3.58345	3.80241	3.46435	3.5606	1.98093	2.59409	2.54538	2.62003	2.68896	2.69828	2.52128	0.827014	0.850715	0.897148	0.958291	0.678866	0.719937	0.821995	5.53585	4.48756	5.32896
ENSDARG00000003757	cnpy1	ENSMUSG00000044681	Cnpy1	ortholog_one2one	19.2513	38.2979	75	4.96	0	0.0140405	18.3	18.5	19.58	18.7933	21.86	24.55	22.49	22.9667	8.02	17.09	22.67	15.9267	11.97	8.69	9.01	9.89	0.00391985	0	0	0	0	0	0	0	0	0	0	0	0	0	0	0	0	0	0	0	0	0	0
ENSDARG00000003769	tada2b	ENSMUSG00000029196	Tada2b	ortholog_one2one	73.6626	85.2381	100	93.4	1	1.16475e-05	1.38	1.38	1.62	1.46	2.01	1.81	1.76	1.86	1.87	1.94	1.5	1.77	1.07	0.64	1.02	0.91	2.39714e-06	13.2397	13.9808	13.7636	14.0963	13.7701	9.91584	10.1966	9.27858	9.35323	9.56049	9.91712	9.70363	5.60643	4.82593	4.74814	4.45276	4.99543	4.57147	4.86669	6.57672	6.67104	6.71143
ENSDARG00000003776	pip4k2aa	ENSMUSG00000026737	Pip4k2a	ortholog_one2many	87.3762	87.1605	50	56.08	0	0.0108202	1.23	0.94	1.16	1.11	1.54	1.39	1.65	1.52667	5.36	11.12	4.91	7.13	5.21	5.19	4.47	4.95667	6.56603e-09	49.4742	47.9999	45.6132	46.108	47.2988	36.8827	36.9497	36.7403	37.9527	38.3946	35.8135	37.1223	2.80055	3.09359	2.78297	3.0678	3.15652	3.04597	2.99124	9.19899	9.12027	9.64719
ENSDARG00000003779	ctnnd2b	ENSMUSG00000022240	Ctnnd2	ortholog_one2many	77.8051	76.244	0	5.29	0	4.72467e-05	5.07	4.65	4.38	4.7	0.48	0.46	0.57	0.503333	0	0.08	0.09	0.0566667	0.04	0.04	0.00637	0.02879	2.24821e-05	3.8397	3.82136	3.87138	3.58126	3.77843	7.67135	7.82876	7.77047	7.30817	8.18832	6.72708	7.58236	0.854922	1.19699	0.650956	0.788	1.2372	0.922537	0.941769	3.62795	4.30969	3.35394
ENSDARG00000003789	dennd5b	ENSMUSG00000030313	Dennd5b	ortholog_one2one	72.4528	75.3532	50	4.43	0	2.254e-05	46.39	46.57	47.42	46.7933	0.58	0.98	0.57	0.71	4.09	2.57	1.68	2.78	26.47	36.06	32.24	31.59	0.00468506	2.82525	3.35215	3.0901	3.06504	3.08314	1.04145	1.14501	0.952601	0.938386	0.891033	1.17992	1.02473	0.379068	0.363551	0.401652	0.360771	0.324189	0.43311	0.377057	1.45898	1.21847	0.948439
ENSDARG00000003795	idh2	ENSMUSG00000030541	Idh2	ortholog_one2one	63.7778	63.4956	25	5.39	0	2.38879e-05	110.08	105.13	98.35	104.52	121.49	126.78	120.59	122.953	36.39	42.31	30.44	36.38	31.29	12.84	13.9	19.3433	1.57742e-08	24.8258	25.1924	23.199	22.4675	23.9211	15.6938	15.574	15.3088	15.2192	14.4714	14.4117	15.1131	59.1517	58.8627	58.4161	58.7431	58.0826	58.2427	58.5832	37.2303	38.21	37.3183
ENSDARG00000003797	asb2a.1	ENSMUSG00000021200	Asb2	ortholog_one2many	48.7663	52.9968	75	4.31	0	0.395069	0	0.03	0.05	0.0266667	0.01	0.04	0	0.0166667	0	0	0	0	0	0.0083	0	0.00276667	1.54538e-14	0.0254407	0.0253192	0.0554847	0.0553662	0.0404027	0	0	0	0	0	0	0	0	0	0	0	0	0	0	0	0	0
ENSDARG00000003803	LHX3	ENSMUSG00000026934	Lhx3	ortholog_one2one	62.406	61.9403	25	36.26	0	1.26219e-08	12.24	16.22	14.92	14.46	0	0	0	0	0	0	0	0	0	0.01	0	0.00333333	0	9.23305	9.83689	9.42295	9.82146	9.57859	20.1495	20.397	21.3335	20.8031	21.5241	20.5126	20.7866	0	0.0301922	0	0	0	0	0.00503203	0.913398	1.03817	1.53472
ENSDARG00000003808	aqp3a	ENSMUSG00000028435	Aqp3	ortholog_one2many	64.5485	66.0959	0	95.17	1	0.404186	0.58	0.63	0.75	0.653333	36.72	33.68	36.69	35.6967	6.59	3.01	1.51	3.70333	9.84	0.06	0.45	3.45	7.33627e-07	0	0	0	0	0	0	0	0	0	0	0	0	0	0	0	0	0	0	0	0.814642	0.594137	0.567792
ENSDARG00000003811	plxnb2a	ENSMUSG00000036606	Plxnb2	ortholog_one2many	51.6793	51.7915	0	48.21	0	0.00146765	0.25	0.36	0.25	0.286667	5.31	5.68	5.39	5.46	0.55	0.37	0.03	0.316667	25.98	23.13	21.36	23.49	5.29655e-09	8.48074	8.16309	8.51643	8.44316	8.40086	42.4372	43.451	41.6135	42.2423	41.7756	43.5338	42.5089	33.9193	35.32	34.0248	33.4874	34.8994	33.9914	34.2737	25.8272	26.0883	26.0535
ENSDARG00000003818	prkag1	ENSMUSG00000067713	Prkag1	ortholog_one2one	78.1818	78.1818	0	7.26	0	2.01299e-05	34.48	32.73	37.58	34.93	13.65	11.03	12.57	12.4167	14.29	7.15	6.7	9.38	2.92	2.23	2.66	2.60333	5.35804e-08	59.6339	59.4586	57.1103	57.8863	58.5223	46.3734	47.4101	51.0306	45.8101	47.2654	47.3618	47.5419	53.3313	53.4324	53.6117	52.8552	54.5885	52.0523	53.3119	43.4805	41.7349	42.795
ENSDARG00000003820	nr1d2a	ENSMUSG00000021775	Nr1d2	ortholog_one2many	61.9048	54.1667	25	0	0	0.000334338	43.46	46.26	52.47	47.3967	122.27	102.92	114.73	113.307	59.26	60.29	35.66	51.7367	67.02	55.84	41.02	54.6267	5.39864e-07	37.785	37.9632	36.7628	36.1745	37.1714	25.3148	24.0048	26.2437	26.8853	26.8754	27.3858	26.1183	29.4688	31.8584	28.6697	29.5503	31.6927	32.087	30.5545	32.8326	32.0604	36.153
ENSDARG00000003822	ankrd16	ENSMUSG00000047909	Ankrd16	ortholog_one2one	57.337	58.4488	0	83.94	1	0.0106261	0.48	0.48	0.65	0.536667	1.33	1.8	1.26	1.46333	0.62	0.81	0.15	0.526667	0.52	0.88	0.74	0.713333	2.7812e-08	3.39095	3.91956	3.05104	3.27617	3.40943	3.42689	3.45937	3.78163	3.25048	3.87351	3.67562	3.57792	3.14417	3.11829	2.24739	2.27184	2.63281	2.7259	2.69007	2.71545	3.00067	3.22448
ENSDARG00000003827	snapc1b	ENSMUSG00000114046	AC124712.1	ortholog_many2many	14.0401	33.1081	50	14.13	0	0.00338501	4.73	6.33	6.25	5.77	4.95	6.38	6.63	5.98667	4.62	3.98	2.33	3.64333	0.94	1.22	1.15	1.10333
ENSDARG00000003829	galnt2	ENSMUSG00000092329	Gm20388	ortholog_one2many	81.0376	84.5149	75	20.63	1	5.29325e-05	3.12	4.57	3.66	3.78333	4.03	4.21	4.1	4.11333	4.52	2.65	4.27	3.81333	2.89	3.01	3.32	3.07333	0.962686	0	5.9893	0	4.53929	2.63215	0	11.3828	0	0	0	0	1.89714	9.90065	0	6.86981	0	9.30921	7.87519	5.65914	7.51335	0	0
ENSDARG00000003835	stom	ENSMUSG00000026880	Stom	ortholog_one2one	75.1701	77.8169	25	6.32	0	0.00427164	8.16	4.73	6.07	6.32	7.26	5.53	8.16	6.98333	2.89	1.86	2.99	2.58	4.58	3.02	2.58	3.39333	6.73462e-11	0.541877	0.539289	0.729936	0.554955	0.591514	0.519657	0.430179	0.200686	0.305092	0.676642	0.422185	0.42574	3.6763	4.48782	3.97492	3.66327	4.22485	4.91941	4.15776	4.9543	4.89226	4.4449
ENSDARG00000003841	usb1	ENSMUSG00000031792	Usb1	ortholog_one2one	44.9275	46.4419	25	57.78	0	9.43048e-05	6.88	5.83	6.01	6.24	5.82	5.51	5.26	5.53	3	4.26	4.26	3.84	0.52	0.89	0.57	0.66	1.26111e-10	10.6222	11.4712	10.5622	10.8207	10.869	14.4594	13.9122	13.1112	14.5586	12.6252	13.9336	13.7667	17.1761	17.3264	16.2912	17.5137	17.233	16.0601	16.9334	11.6024	11.7867	12.2416
ENSDARG00000003845	chm	ENSMUSG00000025531	Chm	ortholog_one2many	51.3514	51.6616	25	27.16	0	7.46036e-06	21.38	22.17	24.13	22.56	8.58	7.92	7.67	8.05667	3.1	4.91	2.94	3.65	2.24	2.53	2.54	2.43667	2.73685e-08	2.40562	2.24863	2.39136	2.42965	2.36881	1.4785	1.37089	1.82698	1.62548	1.44037	1.58432	1.55442	1.61574	1.34242	1.35047	1.69546	1.15853	1.32539	1.41467	2.93015	3.17639	3.2472
ENSDARG00000003846	mrpl21	ENSMUSG00000024829	Mrpl21	ortholog_one2one	48.5714	47.2222	0	3.6	0	9.20555e-07	49.69	43.58	37.57	43.6133	13.93	18	17.01	16.3133	10.12	12.09	11.56	11.2567	4.3	4.88	4.53	4.57	2.77664e-09	19.8952	20.4245	19.3009	19.7472	19.842	18.6067	19.7834	14.4351	14.7252	17.4721	16.1233	16.8576	18.0648	16.0464	22.2478	20.7018	18.9411	17.7676	18.9616	14.1268	14.9338	14.3044
ENSDARG00000003854	acsl1b	ENSMUSG00000018796	Acsl1	ortholog_one2many	64.8494	64.6638	0	0	0	5.339e-10	4.07	5.65	5.25	4.99	7.32	8.62	6.52	7.48667	1.62	0.94	1.55	1.37	0.61	0.22	0.11	0.313333	0.00198458	16.5535	18.1712	16.0985	16.9555	16.9447	38.0336	38.7364	39.3378	38.2682	39.6814	39.2331	38.8818	20.6439	21.446	21.3571	20.6005	23.0077	22.2188	21.5457	28.715	30.5732	28.8025
ENSDARG00000003860	cbx3a	ENSMUSG00000029836	Cbx3	ortholog_one2one	76.2712	73.7705	50	61.55	0	7.98264e-05	29.91	30.47	31.16	30.5133	65.43	76.66	74.71	72.2667	56.33	91.2	72.88	73.47	10.06	11.19	10.46	10.57	0.374829	2.53952	3.27727	2.49538	2.73299	2.76129	2.64948	3.12059	3.30905	3.26466	3.2738	2.92619	3.09063	3.56657	4.24229	4.54341	4.29766	4.4653	4.04191	4.19286	5.19886	5.44577	6.20715
ENSDARG00000003865	pard6b	ENSMUSG00000044641	Pard6b	ortholog_one2one	61.9423	63.6119	0	74.21	1	0.0726958	7.21	5.47	5.57	6.08333	1.95	2.28	2.22	2.15	0.63	0	0.56	0.396667	1.93	1.31	1.69	1.64333	3.11168e-09	13.6532	13.5088	14.5993	13.645	13.8516	13.1442	12.6503	13.2418	13.6743	13.5658	13.5773	13.309	22.2298	20.6915	21.6421	21.4799	21.3365	22.1573	21.5895	16.7453	16.1887	15.4903
ENSDARG00000003866	tm9sf2	ENSMUSG00000025544	Tm9sf2	ortholog_one2one	83.7386	83.2326	0	77.47	1	1.13495e-06	120.96	121.58	113.5	118.68	50.61	54.3	50.92	51.9433	44.96	55.14	42.57	47.5567	35.42	26.81	31.41	31.2133	4.27182e-05	280.803	278.711	269.71	271.217	275.11	167.742	169.006	175.784	173.344	177.441	176.544	173.31	102.098	105.073	103.043	103.061	111.271	105.429	104.996	137.441	135.703	139.446
ENSDARG00000003867	cdk20	ENSMUSG00000021483	Cdk20	ortholog_one2one	77.0349	76.5896	0	58.68	0	2.32546e-06	8.21	9.29	8.88	8.79333	3.2	4.08	3.23	3.50333	0.06	0.63	0	0.23	0.06	0.04	0.01	0.0366667	9.43464e-08	9.08019	9.47884	7.85676	8.43068	8.71162	6.72019	6.327	6.57651	7.97731	6.00976	6.59071	6.70025	6.20438	6.34383	5.35622	6.57889	5.00878	6.15154	5.94061	3.26392	4.4904	4.32231
ENSDARG00000003869	decr1	ENSMUSG00000028223	Decr1	ortholog_one2one	68.1682	67.7612	25	47.22	0	0.000210444	15.25	15.63	16.48	15.7867	24.64	22	24.93	23.8567	2.93	3.99	2.33	3.08333	53.59	36.75	35.31	41.8833	0.000326119	5.45916	6.21915	6.15571	6.29424	6.03206	7.46309	6.76292	6.26478	6.94225	6.02143	6.20502	6.60992	18.3929	18.1311	19.0981	18.1545	17.8918	18.3951	18.3439	14.2378	14.6948	14.7782
ENSDARG00000003872	ccdc102a	ENSMUSG00000063605	Ccdc102a	ortholog_one2one	64.716	68.4882	25	75.73	1	1.19917e-07	2.6	3.51	4.6	3.57	0.04	0.02	0.05	0.0366667	0.06	0.25	0.13	0.146667	0.73	0.76	0.4	0.63	8.87155e-12	1.51145	1.61167	1.8444	1.84046	1.702	0.724734	1.07541	1.09511	0.880252	1.04537	0.873848	0.94912	7.36624	7.12278	7.77031	6.53458	8.25051	7.60468	7.44152	3.88759	4.30031	4.64501
ENSDARG00000003877	pbrm1	ENSMUSG00000042323	Pbrm1	ortholog_one2many	67.873	62.7347	50	10.26	0	6.38159e-06	1.52	1.38	1.2	1.36667	0.32	0.35	0.29	0.32	0.15	0.44	0.01	0.2	0.53	0.55	0.46	0.513333	4.57044e-13	7.43624	7.48184	6.77602	6.77264	7.11668	12.4945	12.3041	12.1857	12.4368	12.7355	12.6039	12.4601	9.04968	9.24964	8.77451	8.85054	9.49987	8.18723	8.93525	13.3289	13.2671	13.665
ENSDARG00000003899	zdhhc23b	ENSMUSG00000036304	Zdhhc23	ortholog_one2many	49.0654	49.4118	100	99.67	0	2.56221e-09	75.88	72.03	72.13	73.3467	2.67	3.02	2.14	2.61	8.07	8.05	8.21	8.11	0.4	0.95	0.74	0.696667	3.98119e-08	1.88137	2.77629	1.41488	2.47075	2.13582	3.04851	2.25137	2.65494	2.69077	2.75431	2.79261	2.69875	4.78597	3.37559	3.59559	3.05687	3.8733	3.08072	3.62801	1.21573	0.995711	2.09343
ENSDARG00000003903	hapln2	ENSMUSG00000004894	Hapln2	ortholog_one2one	54.5994	53.9589	25	47.13	0	0.103502	0	0.01	0	0.00333333	23.28	22.94	22.95	23.0567	0.41	0	0.58	0.33	0.02	0	0	0.00666667	0.163458	0.152022	0.037824	0.0828877	0	0.0681834	0.0728941	0.0732733	0	0	0.0424619	0	0.0314382	0	0	0	0	0	0	0	0	0	0
ENSDARG00000003904	sycp1	ENSMUSG00000027855	Sycp1	ortholog_one2one	29	29.2044	50	20.77	0	2.90543e-07	7.33	5.89	7.73	6.98333	2.52	2.47	2.12	2.37	0.8	0.68	0.48	0.653333	0.4	0.37	0.06	0.276667	0.0311177	0.152043	0.0252195	0.110532	0.0827224	0.0926294	0.0972058	0.0488557	0.106363	0.107798	0.0283119	0.139848	0.0880638	0	0.0775607	0.0585193	0.0291228	0.0605176	0.0902515	0.052662	0	0.0555617	0.0584078
ENSDARG00000003909	ftr01	ENSMUSG00000020773	Trim47	ortholog_one2many	24.3542	20.5607	0	0	0	0.0054176	1.81	1.85	1.59	1.75	0	0	0	0	0.05	0.05	0	0.0333333	0.47	0.59	0.32	0.46	2.81454e-13	0	0	0	0	0	0.189578	0.0635214	0.0691457	0.0700787	0.0736214	0.145462	0.101901	0.992784	0.672287	0.836944	0.90876	1.18026	1.13432	0.954226	2.97814	3.43142	3.22749
ENSDARG00000003910	med13b	ENSMUSG00000034297	Med13	ortholog_one2many	66.6667	64.5785	0	77.88	1	0.00068325	13.56	12.52	11.68	12.5867	2.6	2.49	2.05	2.38	0.32	0.72	0.4	0.48	3.19	2.58	2.28	2.68333	1.8313e-14	1.5545	1.91109	1.43225	1.46538	1.5908	1.52264	1.45043	1.27355	1.28189	1.36527	1.19278	1.34776	0.915568	0.780262	0.671892	0.859822	0.665057	0.7599	0.775417	3.20721	3.26258	3.41054
ENSDARG00000003920	setb	ENSMUSG00000054766	Set	ortholog_one2many	86.9091	82.699	0	73.85	0	0.000131423	182.97	187.43	191.78	187.393	209.07	208.88	201.25	206.4	101.71	123.87	154.5	126.693	19.73	15.53	19.39	18.2167	0.249735	15.0997	13.7496	13.1581	14.7442	14.1879	15.4572	14.5558	13.8466	15.3285	14.5945	13.8071	14.5983	22.8898	23.221	22.5479	22.3406	22.4983	23.735	22.8721	20.5742	20.9714	19.2644
ENSDARG00000003927	cldn12	ENSMUSG00000046798	Cldn12	ortholog_one2one	38.1232	53.2787	0	78.03	0	0.000600532	17.34	16.91	17.72	17.3233	16.48	15.26	15.77	15.8367	10.9	10.08	11.8	10.9267	6.63	7.14	6.23	6.66667	0.011867	13.8108	14.5933	13.8749	13.5206	13.9499	6.07037	5.62941	6.48568	6.48253	6.54831	5.97512	6.19857	11.8698	10.4808	10.4589	10.2875	11.2741	10.7029	10.8457	13.7674	12.921	13.6812
ENSDARG00000003931	cndp2	ENSMUSG00000024644	Cndp2	ortholog_one2one	78.481	78.3158	0	79.81	1	1.47122e-06	15.78	14.7	14.99	15.1567	14.86	14.47	14.28	14.5367	55.29	68.41	63.77	62.49	10.83	12.68	7.77	10.4267	0	30.0653	30.0911	29.0292	29.3374	29.6307	44.1663	45.5439	45.8281	46.5822	42.903	46.1862	45.2016	72.4648	75.8824	72.1801	71.647	72.9692	70.5783	72.6203	142.037	137.95	134.038
ENSDARG00000003934	nxnl2	ENSMUSG00000021396	Nxnl2	ortholog_one2one	65.3846	65.3846	0	97.9	1	2.03168e-07	21.46	20.61	20.26	20.7767	8.24	8.71	6.84	7.93	2.08	1.35	1.59	1.67333	0.72	0.41	0.43	0.52	2.51581e-07	0.852297	0.694003	0.168983	0.252933	0.492054	1.6347	1.49382	1.62608	2.63684	1.73134	1.36832	1.74852	0.241521	0.1581	0.0894646	0.267139	0	0.183969	0.156699	0.427051	0	0.446471
ENSDARG00000003938	rpa1	ENSMUSG00000000751	Rpa1	ortholog_one2one	63.5607	59.3168	50	24.81	0	0.000148804	23.73	21.57	21.49	22.2633	26.27	31.19	27.64	28.3667	16.23	22.36	22.75	20.4467	2.23	2.73	1.84	2.26667	1.56289e-05	24.8944	25.0488	24.1519	24.6452	24.6851	16.7472	16.2269	15.5278	15.8576	16.1177	15.5662	16.0072	12.4717	12.6745	12.8893	11.7337	13.4645	13.4825	12.786	18.0215	18.4897	17.8543
ENSDARG00000003940	mtfr1l	ENSMUSG00000046671	Mtfr1l	ortholog_one2one	50.8091	54.3253	25	42.35	0	0.00209648	24.67	24.33	25.78	24.9267	14.25	14.12	12.51	13.6267	6.29	9.14	8.43	7.95333	2.08	1.89	1.82	1.93	6.24233e-10	53.6303	54.2927	52.6633	53.3543	53.4851	44.0448	43.7724	43.8095	45.4179	46.2328	47.6926	45.1617	66.4126	69.5421	68.5317	65.3185	69.1487	71.9762	68.4883	47.7977	48.6769	47.9601
ENSDARG00000003941	rrs1	ENSMUSG00000061024	Rrs1	ortholog_one2one	63.0058	59.726	25	94.08	1	0.00445486	17.98	14.2	15.14	15.7733	16.17	17.17	17.13	16.8233	8.13	21.1	18.76	15.9967	3.87	3.27	5.49	4.21	2.94634e-10	14.2998	12.6551	13.9622	13.0706	13.497	9.49394	9.37366	9.69576	8.23562	10.1267	10.5385	9.57736	11.018	12.5693	12.4979	12.8945	11.9264	11.5963	12.0837	8.19683	8.97203	9.48232
ENSDARG00000003944	nmur1b	ENSMUSG00000026237	Nmur1	ortholog_one2many	48.0198	45.3271	0	0	0	0.550856	0	0	0	0	0	0	0	0	0	0	0	0	0	0	0	0	0.358067	0	0	0	0	0	0.130735	0	0	0	0.0761552	0	0.0344817	0	0	0	0	0	0	0	0	0	0
ENSDARG00000003952	pfn2	ENSMUSG00000027805	Pfn2	ortholog_one2many	68.5714	68.5714	50	0	0	0.000387742	18.68	18.07	19.92	18.89	50.46	41.66	45.1	45.74	21.74	42.15	44.72	36.2033	25.64	19.37	14	19.67	0	23.2848	22.9457	22.6441	21.7374	22.653	9.73735	8.43878	10.3876	9.39112	10.9463	10.0274	9.82143	47.6742	47.2268	45.574	44.3957	46.5225	46.8577	46.3752	21.7683	22.0677	22.8756
ENSDARG00000003961	parp3	ENSMUSG00000023249	Parp3	ortholog_one2one	54.8023	54.5966	50	13.61	0	1.36615e-06	39.21	34.8	37.86	37.29	11.85	12.3	12.31	12.1533	5.76	8.38	7.04	7.06	3.04	6.29	4.57	4.63333	2.66078e-10	3.45925	3.32151	2.78931	2.86288	3.10824	2.87352	2.81802	3.06753	3.13483	2.66731	3.79125	3.05874	7.39116	6.66089	7.56657	7.50318	8.93033	7.69294	7.62418	6.17636	6.48977	6.06418
ENSDARG00000003963	traf4a	ENSMUSG00000017386	Traf4	ortholog_one2one	77.0213	77.0213	25	99.86	1	0.000382503	8.37	6.89	7.22	7.49333	2.61	3.52	3.45	3.19333	0.7	1	0	0.566667	0.83	1.25	1.04	1.04	2.9152e-10	1.66974	1.63452	1.8208	2.08498	1.80251	0.971261	0.976313	1.20637	1.42643	1.2233	1.02723	1.13848	3.46988	3.49086	2.78134	3.02	3.10511	2.79469	3.11031	0.96556	0.930271	1.10411
ENSDARG00000003965	tlx1	ENSMUSG00000025215	Tlx1	ortholog_one2one	68.1063	61.5616	0	59.79	0	0.0176942	0	0	0	0	0	0	0	0	1.46	1.02	0.32	0.933333	0.02	0.00769	0	0.00923	1	0	0	0	0	0	0	0	0	0	0	0	0	0	0	0	0	0	0	0	0	0	0
ENSDARG00000003971	isl2a	ENSMUSG00000032318	Isl2	ortholog_one2many	87.1866	87.1866	75	56.02	1	0.00141305	0	0	0	0	0	0	0	0	0.1	0.05	0	0.05	0.09	0.05	0.05	0.0633333	2.11409e-09	14.2583	12.1046	12.6806	13.2795	13.0808	13.8707	14.9331	14.9187	14.1586	14.8743	12.3815	14.1895	15.669	16.7269	15.6569	16.3393	16.0444	18.1956	16.4387	11.7767	12.8835	11.4599
ENSDARG00000003973	chordc1a	ENSMUSG00000001774	Chordc1	ortholog_one2many	69.5015	71.6012	0	31.31	0	0.000274229	14.59	14.47	15.32	14.7933	1.36	1.48	1.74	1.52667	3.46	2.94	1.74	2.71333	2.25	1.46	1.99	1.9	8.92713e-06	68.9421	70.6057	69.2523	72.3951	70.2988	46.598	46.4464	49.058	49.2854	49.0373	52.2333	48.7764	40.5092	39.5676	39.0236	37.5731	37.1843	39.9288	38.9644	40.7239	42.9205	40.5035
ENSDARG00000003974	spoplb	ENSMUSG00000026771	Spopl	ortholog_one2many	86.0051	86.2245	0	25.72	0	0.00143459	24.03	23.72	21.42	23.0567	9.77	11.25	11.76	10.9267	7.01	6.85	10.72	8.19333	11.49	9.16	4.66	8.43667	1	6.63764	2.41551	7.36975	2.21788	4.66019	6.4169	2.77918	6.54299	6.48867	6.92156	6.42345	5.92879	1.86702	8.89254	2.07475	9.26191	1.8734	1.83073	4.30006	1.27121	6.08609	5.64062
ENSDARG00000003984	LTN1	ENSMUSG00000052299	Ltn1	ortholog_one2one	52.2559	51.7827	0	86.24	1	0.00830978	3.09	2.71	2.77	2.85667	0.74	0.99	0.72	0.816667	0.11	0.42	2.46	0.996667	3.67	2.55	3.31	3.17667	9.13441e-06	5.05469	5.57534	4.40705	4.28359	4.83017	4.09909	4.00814	4.35081	3.976	4.12494	4.42215	4.16352	4.52598	4.46784	4.51854	4.2297	5.42382	4.86704	4.67215	5.86722	5.98836	5.95955
ENSDARG00000003989	crhr1	ENSMUSG00000018634	Crhr1	ortholog_one2one	80.2326	83.1325	0	88.78	1	0.000953551	0	0	0	0	0.39	0.29	0.29	0.323333	0.07	0.1	0.14	0.103333	0.00887	0.01	0.00588	0.00825	9.92638e-14	5.71436	5.5777	4.75339	4.54395	5.14735	38.1846	36.6883	37.1693	38.372	37.5698	38.1263	37.685	54.4651	58.4873	51.643	53.6748	55.8559	53.4891	54.6025	9.28714	7.67018	8.65409
ENSDARG00000003991	fhl2b	ENSMUSG00000008136	Fhl2	ortholog_one2many	81.7204	81.7204	50	100	1	0.550856	0	0	0	0	0	0	0	0	0	0	0.04	0.0133333	0.01	0	0	0.00333333	0.0026504	0.0950037	0.141825	0.258997	0.258444	0.188567	1.00219	1.09898	1.04675	1.16191	1.00836	0.471871	0.965012	1.53006	2.18086	1.53575	1.58316	2.43902	1.35344	1.77038	2.72286	3.43704	3.39412
ENSDARG00000003994	syt9a	ENSMUSG00000062542	Syt9	ortholog_one2many	65.8135	73.3198	0	10.56	0	0.0840202	0	0	0	0	0.05	0.04	0.03	0.04	0.89	0.04	0	0.31	0	0	0	0	4.25675e-11	0.27176	0.225385	0.197564	0.0985711	0.19832	1.28136	1.13521	0.736682	0.650285	1.03739	0.774882	0.935968	1.81189	1.77909	1.25516	1.76982	1.56844	2.12397	1.71806	0	0	0.0260993
ENSDARG00000003998	phyhipla	ENSMUSG00000037747	Phyhipl	ortholog_one2many	84.3501	84.8	25	2.4	0	2.37826e-05	27.74	27.92	27.74	27.8	0.03	0.09	0	0.04	0.76	0.86	0.58	0.733333	0.01	0.02	0	0.01	0	6.63888	6.7454	6.08845	6.20643	6.41979	9.35018	9.72015	9.57032	10.4774	9.14495	9.78042	9.6739	46.786	46.2982	45.7158	43.7994	48.0509	46.6738	46.2207	10.7171	10.019	10.2654
ENSDARG00000004017	spag1a	ENSMUSG00000037617	Spag1	ortholog_one2one	38.2488	18.424	50	28.95	0	0.00011563	227.88	231.74	228.88	229.5	12.66	11.78	10.59	11.6767	13.32	19.89	29.68	20.9633	7.36	5.29	6.94	6.53	0	2.48077	2.37487	2.60215	1.95387	2.35291	3.08143	3.14301	3.34692	3.16595	2.63968	2.89461	3.04526	7.70838	6.99036	7.20202	7.73855	8.18146	7.82562	7.60773	6.66728	5.62065	6.04471
ENSDARG00000004018	CHST13	ENSMUSG00000056643	Chst13	ortholog_one2one	51.4706	52.0833	0	0	0	5.68e-07	6.39	6.35	5.55	6.09667	8.85	9.49	9.96	9.43333	12.61	11.24	13.19	12.3467	0.76	0.78	1.14	0.893333	0.000106817	0	0	0	0	0	1.41151	0.735703	1.20127	1.04355	1.21812	1.08305	1.11553	0	0.222469	0.125889	0.0626502	0.195282	0.0647176	0.111835	0	0	0
ENSDARG00000004023	isl1	ENSMUSG00000042258	Isl1	ortholog_one2one	97.9943	97.9943	25	100	1	2.30676e-11	60.08	60.93	55.06	58.69	0.1	0.3	0.19	0.196667	0	0.13	0.42	0.183333	0.04	0.02	0	0.02	3.43747e-15	23.717	23.6717	23.2069	22.2905	23.2215	90.1048	91.1879	94.1985	95.5422	95.2352	97.3747	93.9405	24.8797	22.6877	21.6294	22.81	24.4336	23.5357	23.3294	37.3844	36.1319	36.199
ENSDARG00000004034	arhgdig	ENSMUSG00000073433	Arhgdig	ortholog_one2one	57.3529	52	0	2.47	0	1.99516e-09	2.3	1.82	1.82	1.98	43.44	42.46	46.11	44.0033	119.7	125.53	109.24	118.157	4.27	4.6	1.26	3.37667	2.90485e-06	34.1657	35.3538	34.084	34.3127	34.479	5.55379	5.87651	6.16421	6.15899	6.19171	5.47457	5.9033	3.54135	2.94012	3.00752	3.47113	4.23519	3.19092	3.39771	15.1808	17.1027	14.7215
ENSDARG00000004037	cog2	ENSMUSG00000031979	Cog2	ortholog_one2one	66.0274	65.9371	75	56.43	1	0.000433557	7.48	8.43	7.46	7.79	6.95	7.82	7.49	7.42	3.08	3.08	4.87	3.67667	2.95	2.72	3.24	2.97	5.04495e-15	6.50655	7.18872	5.92295	5.99239	6.40265	6.54721	6.38128	6.86714	6.13746	6.34237	6.72363	6.49985	13.6388	14.2771	14.1328	13.7416	13.8273	13.501	13.8531	8.35736	9.73828	9.99803
ENSDARG00000004046	phf6	ENSMUSG00000025626	Phf6	ortholog_one2one	69.9725	69.7802	100	80.85	1	0.000292716	20.94	24.95	23.87	23.2533	19.17	17.53	17.84	18.18	7.04	6.21	11.73	8.32667	1.07	0.87	1.11	1.01667	3.57382e-09	6.24005	6.33936	6.5358	5.8866	6.25045	3.81942	3.66421	3.86613	3.72514	4.00042	3.65135	3.78778	4.71788	5.32075	5.01812	5.59103	5.1585	5.37509	5.1969	3.74676	4.01072	3.90219
ENSDARG00000004049	marcksa	ENSMUSG00000069662	Marcks	ortholog_one2many	50.8475	38.835	0	97.22	1	0.0185392	0	0	0	0	0.61	1.05	0.78	0.813333	0.41	0.98	0.3	0.563333	0.05	0.05	0.03	0.0433333	7.27186e-05	0.534255	0.465241	0.315569	0.484454	0.44988	0.725826	0.665225	0.817561	0.497156	0.820738	0.761674	0.714696	1.22588	1.72606	1.4908	1.48382	1.48854	1.69135	1.51774	2.33116	1.97675	2.79633
ENSDARG00000004055	uhrf1bp1l	ENSMUSG00000019951	Uhrf1bp1l	ortholog_one2one	51.0593	49.6225	50	51.18	0	5.51945e-08	20.2	20.75	19.21	20.0533	1.43	1.16	1.08	1.22333	0.95	2.44	6.95	3.44667	5.63	8.48	7.07	7.06	1.85606e-05	5.36808	5.46765	5.60982	5.50658	5.48803	6.68966	6.41451	7.33453	6.39281	6.35675	6.2336	6.57031	4.74976	4.57822	4.56801	4.32172	5.12462	4.92903	4.71189	4.36099	4.41377	4.38209
ENSDARG00000004059	galk2	ENSMUSG00000027207	Galk2	ortholog_one2one	64.9891	64.8472	50	84.54	1	0.0185604	0	0	0	0	0.92	0.98	0.58	0.826667	4.02	1.25	5.19	3.48667	0.8	1.03	0.57	0.8	6.23185e-12	2.91588	2.96088	2.64704	2.6736	2.79935	1.44784	1.55525	1.21147	1.30652	1.71985	1.6337	1.4791	4.29085	4.3038	4.78536	3.92946	3.51716	4.1997	4.17105	2.82267	2.70988	2.95103
ENSDARG00000004060	bhlhe40	ENSMUSG00000030103	Bhlhe40	ortholog_one2one	61.0422	59.854	50	50.79	0	0.00100402	184.42	183.62	175.37	181.137	44.45	46.1	47.44	45.9967	107.45	96.83	119.13	107.803	17.43	24.64	33.04	25.0367	5.9743e-09	8.81281	8.85295	10.0606	10.159	9.47133	1.79593	1.83182	1.67613	1.72803	2.21539	1.97582	1.87052	17.7416	17.8981	18.1574	17.8509	19.7969	18.6689	18.3523	21.7972	21.5874	20.5032
ENSDARG00000004074	bach2b	ENSMUSG00000040270	Bach2	ortholog_one2one	57.8372	56.7342	100	40.24	1	8.80642e-06	1.24	0.61	0.86	0.903333	0.36	0.22	0.22	0.266667	0.1	0.13	0.01	0.08	0.12	0.06	0.06	0.08	0.002524	0.0543929	0.0811998	0.0395426	0.0493227	0.0561145	0.643338	0.655423	0.561252	0.636314	0.546939	0.780469	0.637289	0.273165	0.342214	0.104675	0.14586	0.19485	0.107624	0.194731	0.279808	0.208709	0.177609
ENSDARG00000004078	acsl4a	ENSMUSG00000031278	Acsl4	ortholog_one2many	74.9292	74.4023	25	88.37	1	0.0106381	35.84	37.31	38.67	37.2733	7.63	7.46	8.49	7.86	18.62	21.32	13.03	17.6567	9.39	7.45	4.57	7.13667	9.59772e-15	47.4812	47.7191	44.1231	44.5731	45.9741	28.5229	27.0962	29.5479	28.9714	30.4733	30.8408	29.2421	11.6583	11.3622	12.2239	10.6722	12.8006	12.014	11.7885	23.5971	22.9014	24.4973
ENSDARG00000004094	acsbg2	ENSMUSG00000024209	1700061G19Rik	ortholog_one2many	37.1537	41.844	50	67.67	0	0.000558418	21.27	20.36	19.92	20.5167	3.59	3.31	3.09	3.33	2.11	6.33	9.31	5.91667	2.66	2.97	0.91	2.18	4.0982e-10	0	0	0	0	0	0	0	0	0	0	0	0	0	0	0	0	0	0	0	0	0	0
ENSDARG00000004105	tie1	ENSMUSG00000033191	Tie1	ortholog_one2one	59.0909	58.4656	50	12.93	0	0.142463	0	0	0	0	2.95	2.1	3.03	2.69333	0.6	2.05	3.11	1.92	2.68	1.49	1.46	1.87667	6.80079e-05	0	0	0	0	0	0	0	0	0	0	0	0	0	0	0	0	0	0.0217568	0.00362613	0	0	0
ENSDARG00000004109	CABZ01059909.1	ENSMUSG00000058435	Btnl4	ortholog_many2many	28	11.9454	25	0	0																		1	0	0	0	0	0	0	0	0	0	0	0	0	0	0	0	0	0	0	0	0	0	0
ENSDARG00000004111	esr1	ENSMUSG00000019768	Esr1	ortholog_one2one	48.6819	46.2437	75	10.95	0	0.0352596	0.27	0.24	0.33	0.28	3.91	3.45	3.69	3.68333	1.08	0.39	0.45	0.64	1.56	1.21	1.5	1.42333	1.32115e-06	0	0	0	0	0	0	0	0	0	0	0	0	0	0	0	0	0	0	0	0	0	0
ENSDARG00000004114	tti1	ENSMUSG00000027650	Tti1	ortholog_one2one	51.3489	52.6267	25	87.23	1	0.121455	1.81	1.74	1.18	1.57667	1.12	1.11	0.94	1.05667	0.22	0.9	1.45	0.856667	0.35	0.37	0.43	0.383333	8.16419e-10	4.32114	5.23445	5.80679	4.72576	5.02204	5.92291	5.84853	6.87019	6.38266	6.53463	7.32279	6.48029	8.50355	8.12699	6.75338	7.69996	7.29671	8.67951	7.84335	6.97657	6.29243	8.14898
ENSDARG00000004115	mgat4b	ENSMUSG00000036620	Mgat4b	ortholog_one2one	80.4388	80.292	75	55.89	1	2.03338e-08	23.29	23.76	21.44	22.83	2.65	2.51	2.93	2.69667	0.87	0.03	0	0.3	0.71	1.57	0.67	0.983333	5.43334e-10	52.8934	52.6078	51.3904	54.5984	52.8725	86.9245	86.0029	90.627	90.8631	89.2358	88.742	88.7325	32.8514	32.2568	28.8149	30.7369	31.4609	31.8692	31.3317	37.4459	36.3328	36.7043
ENSDARG00000004130	mvk	ENSMUSG00000041939	Mvk	ortholog_one2one	53.5354	52.0885	100	46.91	1	0.082133	15.64	13.95	13.11	14.2333	0.56	1.03	0.84	0.81	2.03	2.34	1.98	2.11667	3.5	20.42	11.7	11.8733	0.0857573	14.2493	13.3431	14.2895	12.8661	13.687	5.03958	5.00085	4.73667	5.05137	4.554	4.38739	4.79498	5.9503	6.11756	5.40657	5.49743	5.75209	5.35891	5.68048	9.6547	9.15873	8.26911
ENSDARG00000004131	rttn	ENSMUSG00000023066	Rttn	ortholog_one2one	49.1723	49.3711	100	37.2	0	0.0108822	0.09	0.08	0.06	0.0766667	0.16	0.2	0.14	0.166667	0.08	0.73	0.92	0.576667	0.13	0.12	0.09	0.113333	7.85794e-08	0.136382	0.234443	0.24336	0.161894	0.19402	0.749065	0.717106	0.57244	0.71202	0.817275	0.793708	0.726936	0.850243	0.657764	0.730107	0.441715	0.636601	0.750672	0.67785	0.847356	0.869906	0.943044
ENSDARG00000004132	usp19	ENSMUSG00000006676	Usp19	ortholog_one2one	53.9242	58.6029	25	43.49	0	1.13255e-11	40.06	39.47	37.61	39.0467	2.03	2.48	2.18	2.23	1.96	1.47	1.97	1.8	5.91	4.01	4.59	4.83667	1.90456e-07	28.9874	29.5958	28.0959	28.7244	28.8509	22.3942	21.0213	21.9562	23.3635	21.717	21.4219	21.979	15.7171	15.0573	15.3421	14.7968	15.2686	16.0712	15.3755	12.5706	11.9695	12.3283
ENSDARG00000004150	grm2a	ENSMUSG00000023192	Grm2	ortholog_one2many	69.5749	71.3303	50	49.83	0	0.00583107	0	0	0	0	0.15	0.09	0.1	0.113333	0.09	0.05	0.31	0.15	0	0	0.00504	0.00168	0.000401467	0.184125	0.366492	0.401567	0.280497	0.30817	0.0706301	0.0887469	0.289814	0.137072	0.0411431	0.345488	0.162149	0	0	0	0	0	0	0	0	0	0
ENSDARG00000004151	rab23	ENSMUSG00000004768	Rab23	ortholog_one2one	83.1224	83.1224	50	98.19	1	0.000332825	7.14	7.69	5.77	6.86667	0.6	1.11	1.08	0.93	1.42	0.85	0.84	1.03667	1.82	1.23	2.04	1.69667	8.93161e-08	1.72935	1.5479	1.47069	1.24268	1.49765	1.75231	1.53076	1.88315	1.49214	1.77416	1.90876	1.72355	1.64996	1.6312	1.58237	1.56247	1.72732	1.61403	1.62789	1.97825	1.91973	1.93033
ENSDARG00000004154	orai1b	ENSMUSG00000049686	Orai1	ortholog_one2many	78.3186	58.2237	100	69.38	1	0.000102507	2.73	2.27	1.94	2.31333	1.13	1.85	1.55	1.51	0.76	0.53	1.85	1.04667	1.77	1.16	1.39	1.44	1.58217e-06	4.35831	3.71227	3.1684	3.20437	3.61084	7.26722	7.75922	7.86943	8.05913	7.32597	7.23738	7.58639	5.87481	6.20913	5.80308	7.03942	6.23566	6.94542	6.35125	7.96387	8.13554	7.55678
ENSDARG00000004158	tmem63c	ENSMUSG00000034145	Tmem63c	ortholog_one2one	49.8182	51.2469	75	45.93	1	0.306968	0	0	0	0	0.04	0.03	0.08	0.05	0.06	0.02	0	0.0266667	0.01	0	0.00861	0.00620333	0	0	0	0	0	0	0	0	0	0	0	0	0	0	0	0.076337	0.0253267	0	0.0261624	0.0213043	0.48585	0.579831	0.584136
ENSDARG00000004160	reep3b	ENSMUSG00000019873	Reep3	ortholog_one2many	65.4618	64.1732	50	9.84	0	5.27879e-06	119	114.04	113.11	115.383	37.46	43.67	41.46	40.8633	20.84	15.09	16.49	17.4733	11.55	9.76	7.19	9.5	3.39887e-08	17.6995	17.8771	18.6724	19.3491	18.3995	13.7527	13.1576	13.4587	14.1657	13.8884	14.411	13.8057	4.39665	3.64516	4.08737	4.04933	3.83374	4.47616	4.0814	10.8897	10.2525	10.4172
ENSDARG00000004161	ik	ENSMUSG00000024474	Ik	ortholog_one2one	83.3942	82.0467	25	95.49	1	5.67633e-05	51.12	52.14	52.12	51.7933	30.48	30.32	29.06	29.9533	7.67	5.08	15.66	9.47	9.76	9.55	10.23	9.84667	2.66797e-11	94.5353	98.9363	102.103	97.9062	98.3703	43.4244	43.7374	45.0518	44.8916	45.2947	42.405	44.1341	40.06	39.6574	36.8544	36.8377	39.8919	38.3213	38.6038	39.7129	40.2381	39.0215
ENSDARG00000004169	stmn1a	ENSMUSG00000028832	Stmn1	ortholog_one2many	71.1409	71.1409	0	53.44	0	0.00107326	1.4	1.19	1.12	1.23667	19.09	24.19	17.85	20.3767	28	18.72	37.76	28.16	0.75	2.19	0.22	1.05333	0	74.733	76.4292	81.1874	82.9527	78.8256	106.694	101.87	104.101	104.558	106.858	104.479	104.76	476.723	475.365	489.434	494.581	477.987	469.101	480.532	251.431	255.607	247.79
ENSDARG00000004171	rabac1	ENSMUSG00000003380	Rabac1	ortholog_one2one	58.4211	60	0	40.03	0	6.9986e-06	19.71	18.58	21.49	19.9267	14.87	14.89	14.93	14.8967	15.82	17.16	12.3	15.0933	10.37	10.84	10.9	10.7033	5.04495e-15	226.076	220.05	222.657	231.775	225.14	249.602	247.991	233.629	234.202	214.972	231.05	235.241	216.523	209.163	211.442	218.341	199.658	194.429	208.259	288.343	278.853	271.522
ENSDARG00000004173	copa	ENSMUSG00000026553	Copa	ortholog_one2one	86.9281	86.9281	0	99.52	1	0.00456868	34.9	37.51	36.57	36.3267	27.11	26.99	27.17	27.09	4.43	11.44	25.63	13.8333	29.26	20.44	28.84	26.18	0.0427474	19.4522	19.835	19.6068	20.0642	19.7395	15.0428	14.2733	15.2362	15.2283	15.5816	15.4776	15.14	19.9436	20.3726	19.3813	18.8182	19.3697	19.7797	19.6108	15.9424	16.002	15.8412
ENSDARG00000004174	cnot1	ENSMUSG00000036550	Cnot1	ortholog_one2one	90.7751	90.9667	25	99.79	1	1.03484e-05	7.68	8.52	9.47	8.55667	2.01	2.59	2.61	2.40333	1.51	3.87	1.96	2.44667	9.7	7.46	9.25	8.80333	0.00053196	4.79017	5.14141	4.71992	4.73322	4.84618	4.86154	5.26991	5.54492	5.75681	4.94386	4.78925	5.19438	6.18247	6.37739	6.67193	6.17168	7.23321	6.79611	6.57213	7.22199	7.1825	7.9465
ENSDARG00000004176	ulk4	ENSMUSG00000040936	Ulk4	ortholog_one2many	51.3423	12	75	50.27	1	0.000175841	1.09	1.21	1.49	1.26333	0.13	0.13	0.26	0.173333	0	0	0	0	0.09	0.06	0.08	0.0766667	5.95999e-06	0.101578	0.134791	0.135383	0.0982501	0.1175	0.11906	0.0761596	0.0710597	0.0720185	0.0756592	0.137031	0.0918314	0.269725	0.195754	0.3258	0.311305	0.323448	0.267981	0.282335	0.0622069	0.210347	0.104057
ENSDARG00000004177	fam169ab	ENSMUSG00000041817	Fam169a	ortholog_one2one	38.189	29.1729	50	9.12	0	7.94687e-08	2.7	3.61	3.72	3.34333	24.5	27.15	22.73	24.7933	0.11	0.54	0.1	0.25	0.07	0	0	0.0233333	0	6.91198	6.56629	7.366	7.22208	7.01659	0.809738	1.02217	0.844808	0.877091	1.09694	1.17037	0.970186	1.53023	1.26213	1.58712	1.42173	1.54753	1.14228	1.41517	1.16887	1.57149	1.26728
ENSDARG00000004184	nf1b	ENSMUSG00000020716	Nf1	ortholog_one2many	87.423	84.8997	50	9.3	0	6.76509e-07	0.45	0.86	0.72	0.676667	0.71	0.94	0.62	0.756667	0.38	0.61	0.59	0.526667	0.27	0.2	0.15	0.206667	0	0.210753	0.19274	0.136649	0.204537	0.18617	0.147486	0.19218	0.191265	0.205962	0.159098	0.188609	0.180767	0.337351	0.267321	0.401194	0.288032	0.326474	0.24344	0.310635	0.345339	0.387162	0.420123
ENSDARG00000004189	cbx1a	ENSMUSG00000018666	Cbx1	ortholog_one2many	69.3396	79.4595	50	26.92	0	1.91934e-05	38.28	38.67	42.82	39.9233	24.92	21.91	21.17	22.6667	14.87	18.93	25.49	19.7633	4.22	4.43	4.49	4.38	3.02836e-08	10.5442	10.5149	11.0612	10.1197	10.56	14.5813	15.7346	15.8443	15.3404	16.0688	15.2227	15.4653	12.7528	11.6398	12.5159	14.4447	11.9612	12.3927	12.6178	11.2513	11.9527	12.1275
ENSDARG00000004199	spam1	ENSMUSG00000029678	Hyal5	ortholog_one2many	41.9501	35.1711	100	7.38	0	0.0802309	0	0	0	0	0	0	0	0	0	0	0	0	3.97	5.41	18.78	9.38667	1	0	0	0	0	0	0	0	0	0	0	0	0	0	0	0	0	0	0	0	0	0	0
ENSDARG00000004204	efhc2	ENSMUSG00000025038	Efhc2	ortholog_one2one	51.3369	51.2	100	48.1	1	1.9129e-07	4.96	5.87	5.43	5.42	0.07	0	0	0.0233333	0	0	0	0	0.13	0.03	0	0.0533333	2.43274e-12	4.02218	3.75718	3.8859	3.68565	3.83773	0.710546	0.374127	0.518322	0.562839	0.275936	0.311542	0.458885	0.1833	0.287973	0.285173	0.405484	0.294911	0.167546	0.270731	0	0	0
ENSDARG00000004211	ccdc106a	ENSMUSG00000035228	Ccdc106	ortholog_one2many	36.5285	41.349	0	0	0	1.28908e-06	38.94	37.91	42.07	39.64	8.11	6.58	6.64	7.11	2.53	6.25	4.76	4.51333	10.47	10.9	12.16	11.1767	0	0.333868	0.232592	0.109222	0.254307	0.232497	0.352195	0.386212	0.630612	0.390574	0.484922	0.257954	0.417078	0.277524	0.408752	0.346953	0.0767401	0.518268	0.198181	0.304403	0.772868	0.622234	0.731061
ENSDARG00000004218	rnd1b	ENSMUSG00000054855	Rnd1	ortholog_one2many	81.8966	81.8966	0	64.95	0	0.0557837	0	0	0	0	0	0	0	0	0	0	0	0	0	0	0	0	0	19.1034	19.3749	18.977	18.8374	19.0732	21.1453	19.4986	20.9701	21.6084	18.8324	17.6661	19.9535	47.3356	47.8732	47.1317	45.4802	45.586	47.017	46.7373	31.738	29.3669	28.5611
ENSDARG00000004219	slc6a3	ENSMUSG00000021609	Slc6a3	ortholog_one2one	68.75	69.3053	0	45.93	0	0.550856	0	0.06	0	0.02	0	0	0	0	0	0.05	0.04	0.03	0.01	0.00786	0.04	0.0192867	1	0	0	0	0	0	0	0	0	0	0	0	0	0	0	0	0	0	0	0	0	0	0
ENSDARG00000004227	pde3a	ENSMUSG00000041741	Pde3a	ortholog_one2one	55.6545	54.7765	75	49.9	1	0.485988	0	0	0	0	0.58	0.55	0.58	0.57	0	0.12	0	0.04	0.17	0.07	0.03	0.09	2.49249e-13	0	0	0	0	0	0	0	0	0	0	0	0	0.0588081	0.0433078	0.089858	0.0325228	0.0253436	0.041995	0.0486392	0.0233961	0.0155121	0.0489201
ENSDARG00000004243	asic4b	ENSMUSG00000033007	Asic4	ortholog_one2many	58.7814	60.8534	50	26.81	0	0.227766	0.23	0.32	0.41	0.32	0.45	0.75	0.7	0.633333	0.02	0	0	0.00666667	0.05	0.00923	0.02	0.02641	0	0	0	0	0	0	0	0	0	0	0.0369187	0	0.00615311	0	0	0	0	0	0	0	0	0	0
ENSDARG00000004246	slit2	ENSMUSG00000031558	Slit2	ortholog_one2one	79.6958	78.1453	50	80.21	1	7.1145e-05	12.61	12.12	11.84	12.19	1.94	2.21	1.95	2.03333	0.01	0.01	0	0.00666667	0.13	0.14	0.06	0.11	0	0.103049	0.0871731	0.101134	0.0784922	0.0924621	0.123529	0.15894	0.140573	0.082194	0.0805924	0.0625569	0.108064	0.952948	1.10392	0.886446	0.941515	0.935174	0.801312	0.936885	0.630445	0.604403	0.575983
ENSDARG00000004251	dhfr	ENSMUSG00000021707	Dhfr	ortholog_one2one	61.0526	62.0321	50	65.24	0	0.000170369	0.73	0.27	0.21	0.403333	3.72	2.86	3.9	3.49333	4.16	3.14	3.55	3.61667	3.48	3.39	1.93	2.93333	0.0526608	0.953916	0.71202	0.873039	1.22335	0.940582	1.51922	1.64207	1.76959	1.61231	1.38931	1.48532	1.56964	1.61064	1.70315	1.77018	1.82063	1.42382	1.61782	1.65771	1.55852	1.81144	1.70792
ENSDARG00000004260	cul5b	ENSMUSG00000032030	Cul5	ortholog_one2many	95.5128	87.1345	50	48.35	0	0.00478267	9.59	8.18	8.95	8.90667	0.01	0.02	0.02	0.0166667	0	0.04	0	0.0133333	0.00806	0.03	0	0.0126867	0	6.22445	6.16177	5.94514	5.70428	6.00891	4.96376	5.54279	5.23449	4.97649	5.06777	5.10394	5.14821	4.71302	4.84166	4.91883	4.8451	5.15269	5.04429	4.91926	5.69349	5.37198	5.16384
ENSDARG00000004261	tmed9	ENSMUSG00000058569	Tmed9	ortholog_one2one	81.6143	77.4468	25	38.31	0	0.00103675	173.14	177.13	185.32	178.53	148.25	134.8	143.84	142.297	110.89	176.83	216.56	168.093	41.87	33.62	44.98	40.1567	6.3389e-08	47.4035	46.6718	47.1249	49.303	47.6258	55.7444	56.2179	52.0062	51.8306	55.1598	54.1426	54.1836	79.3216	70.7642	76.6433	75.9932	74.3352	75.5627	75.4367	61.348	58.2297	62.0901
ENSDARG00000004262	cyp46a1.4	ENSMUSG00000021259	Cyp46a1	ortholog_one2many	46.9062	47	25	20.05	0	0.000404762	67.36	70.77	72.15	70.0933	43.11	43.92	41.74	42.9233	1.52	4.44	3.62	3.19333	28.07	42.42	45.85	38.78	1.80859e-07	1.91364	1.5236	2.08676	2.03603	1.89001	1.7536	0.901859	1.20483	1.17586	1.18779	1.17343	1.2329	0.574416	0.56402	0.196408	0.58647	0.914019	0.454367	0.548283	2.15633	1.91144	2.35241
ENSDARG00000004270	atl3	ENSMUSG00000024759	Atl3	ortholog_one2one	68.2261	64.695	0	64.51	0	1.07893e-05	11.53	10.76	11.36	11.2167	19.49	20.65	18.03	19.39	7.28	7	9.44	7.90667	6.26	5.84	5.29	5.79667	6.76833e-05	0.497776	0.441843	0.586822	0.512373	0.509704	1.21276	1.42658	1.17172	1.08738	1.09726	1.30673	1.21707	1.64949	1.49611	1.4602	1.7626	1.55826	1.43745	1.56069	1.55716	1.85837	1.78302
ENSDARG00000004280	seh1l	ENSMUSG00000079614	Seh1l	ortholog_one2one	80.7692	81.6667	75	86.65	1	0.00057666	23.86	21.07	22.52	22.4833	27.99	30.91	29.95	29.6167	6.18	11.56	14.98	10.9067	2.7	2.46	3.07	2.74333	3.19861e-05	26.9103	26.8838	26.5222	27.8042	27.0301	26.5441	26.8552	28.1573	26.0024	28.7199	27.92	27.3665	18.0549	18.8525	16.6014	17.9081	17.6886	18.8642	17.9949	17.1486	17.0829	18.342
ENSDARG00000004296	ambp	ENSMUSG00000028356	Ambp	ortholog_one2one	46.5318	46.1318	0	19.22	0	2.48309e-06	0	0.02	0	0.00666667	4.19	6.73	6.4	5.77333	1.01	0.23	0	0.413333	1534.49	1717.34	1299.62	1517.15	1.62755e-07	0	0	0	0	0	0	0	0	0	0	0	0	0	0	0	0	0	0	0	0	0	0
ENSDARG00000004297	irf2bpl	ENSMUSG00000034168	Irf2bpl	ortholog_one2one	78.82	67.2258	0	91.58	1	5.4839e-06	57.61	55.45	55.56	56.2067	16.37	15.52	15.99	15.96	2.61	2.44	3.12	2.72333	0.4	0.32	0.48	0.4	1.45809e-09	2.65161	2.87885	2.8915	2.57534	2.74933	2.03851	2.11249	1.72465	1.53817	1.83628	2.17689	1.9045	10.7702	10.2399	9.51406	9.84734	9.73427	9.93815	10.0073	8.88963	9.44163	10.1273
ENSDARG00000004301	rhogb	ENSMUSG00000073982	Rhog	ortholog_one2many	80.1047	80.1047	50	100	1	0.000171528	0	0	0	0	3.29	2.34	2.95	2.86	26.1	43.74	44.46	38.1	0.84	1.74	0.45	1.01	6.20001e-07	8.63035	9.09438	8.64994	7.25044	8.40628	6.57248	6.3008	6.32598	5.39902	6.23915	5.67341	6.08514	13.7148	13.855	13.1158	12.7628	14.9277	16.6494	14.1709	8.67406	6.67868	6.65512
ENSDARG00000004302	slc45a1	ENSMUSG00000039838	Slc45a1	ortholog_one2one	63.591	67.9095	0	75.93	1	0.70251	0	0	0	0	0.06	0.1	0.21	0.123333	0	0	0.16	0.0533333	0	0	0	0	2.37937e-08	0.0820123	0.102026	0.044716	0.0669308	0.0739212	0.117974	0.098823	0.215146	0.305269	0.114536	0.248932	0.183447	0.40477	0.397445	0.331436	0.329886	0.440684	0.389454	0.382279	0.248612	0.202298	0.236289
ENSDARG00000004305	vangl1	ENSMUSG00000027860	Vangl1	ortholog_one2one	64.8956	65.019	25	24.24	0	0.0176466	0	0	0	0	0.44	0.9	0.56	0.633333	0.05	0.06	0	0.0366667	0.61	1.04	0.52	0.723333	2.42897e-11	1.33479	1.50387	1.59287	1.7676	1.54978	5.86894	5.30467	5.12689	5.57104	5.6135	5.49003	5.49585	5.16822	5.28024	5.33613	4.5297	4.61617	4.85857	4.96484	4.83057	5.08025	5.06475
ENSDARG00000004306	klhl18	ENSMUSG00000054792	Klhl18	ortholog_one2one	82.1181	82.4042	0	100	1	0.0505322	3.8	5.05	3.74	4.19667	1.22	0.78	0.63	0.876667	0.64	1.63	4.38	2.21667	0.62	0.61	0.84	0.69	0.000521108	0.599256	0.749753	0.840177	0.782491	0.742919	0.459747	0.742722	0.68272	0.691933	0.76517	0.661428	0.667286	0.747188	0.821006	1.08733	1.16095	1.04268	0.97567	0.97247	0.717198	0.581883	0.749813
ENSDARG00000004307	lypd6	ENSMUSG00000050447	Lypd6	ortholog_one2one	62.6437	63.7427	100	72.1	1	0.00118853	2.45	3.25	3.63	3.11	3.39	2.66	4	3.35	0	0	0	0	0.04	0.03	0.05	0.04	0	1.52239	1.85181	1.58107	1.70917	1.66611	0.417132	0.326124	0.380357	0.282692	0.431975	0.586784	0.404177	2.48575	2.78592	2.59491	2.41614	2.5681	2.15161	2.5004	4.31531	4.50364	4.23306
ENSDARG00000004308	fam8a1b	ENSMUSG00000069237	Fam8a1	ortholog_one2many	47.3988	41.1028	0	19.65	0	0.29363	0	0	0	0	0	0	0	0	0	0	0	0	0	0	0	0	0.626734	3.03745	3.09324	2.64466	2.6134	2.84719	4.19999	3.90407	3.60734	3.48073	3.31469	3.63846	3.69088	1.66366	2.47435	1.90314	2.40839	2.2774	2.404	2.18849	2.93298	3.71716	3.03922
ENSDARG00000004311	ldlrap1a	ENSMUSG00000037295	Ldlrap1	ortholog_one2many	65.8537	61.3636	25	19.42	0	1.38645e-06	2	2.42	3.61	2.67667	10.15	9.06	9.66	9.62333	0.7	0	0	0.233333	0.36	0.3	0.17	0.276667	4.5418e-07	13.4588	13.3945	14.1578	13.0505	13.5154	8.18548	9.03351	8.17423	8.40757	8.43046	8.08732	8.38643	6.55809	6.32137	6.07066	6.67753	6.47751	6.40953	6.41912	8.417	9.20243	8.68125
ENSDARG00000004318	cbwd	ENSMUSG00000024878	Cbwd1	ortholog_one2one	68.8525	64.1221	50	54.58	0	0.0144998	18.4	20.99	22.48	20.6233	14.58	13.09	13.45	13.7067	3.92	12.45	15.11	10.4933	2.15	2.34	2.59	2.36	1.716e-05	7.83372	8.25763	8.13806	8.57464	8.20102	6.13447	5.71954	5.44771	5.817	5.74855	5.37206	5.70655	5.009	5.29668	5.45927	5.91319	5.47965	5.50299	5.44346	4.24103	4.26865	5.23519
ENSDARG00000004322	ush1ga	ENSMUSG00000045288	Ush1g	ortholog_one2many	64.0306	54.4469	25	100	1	2.94606e-08	15.8	14.89	13.27	14.6533	0.06	0.02	0.02	0.0333333	0	0	0	0	0.02	0.04	0.1	0.0533333	3.5478e-11	5.12428	4.63865	5.05286	4.92344	4.93481	7.71104	7.75115	8.78068	9.59486	8.73998	8.36353	8.49021	2.91708	3.39265	3.27312	2.88191	3.58017	3.10644	3.19189	1.23188	1.28491	1.41355
ENSDARG00000004325	casp9	ENSMUSG00000028914	Casp9	ortholog_one2one	47.0183	45.1542	0	64.02	0	0.000251554	3.52	5.16	6.04	4.90667	10.39	11.16	8.07	9.87333	12.46	7.39	11.22	10.3567	2.62	2.62	2.34	2.52667	3.95789e-11	3.22506	3.60655	3.15759	2.92444	3.22841	3.57503	3.52677	3.11126	3.06104	3.37076	3.44483	3.34828	7.24248	5.85541	6.46667	6.81504	6.62538	7.03993	6.67415	6.78523	5.94976	5.55514
ENSDARG00000004328	LIN28A (1 of many)	ENSMUSG00000050966	Lin28a	ortholog_one2many	66.3366	64.1148	0	74.25	1	0.711779	0	0	0	0	0	0	0	0	0	0	0.07	0.0233333	0.02	0.02	0.07	0.0366667	1	0	0	0	0	0	0	0	0	0	0	0	0	0	0.0230068	0	0	0	0	0.00383447	0	0	0
ENSDARG00000004336	exoc4	ENSMUSG00000029763	Exoc4	ortholog_one2one	80.3719	79.7949	75	93.01	1	0.000469156	9.7	8.99	9.07	9.25333	4.59	4.46	4.51	4.52	3.92	2.62	5.6	4.04667	2.13	2.08	1.97	2.06	3.79909e-09	1.04084	1.04296	0.979524	0.884344	0.986918	2.08519	2.0067	1.90759	2.09255	2.10275	1.93569	2.02175	2.30371	2.50931	2.3707	2.31865	2.43463	2.26821	2.36753	2.44401	2.30559	2.16079
ENSDARG00000004343	nelfe	ENSMUSG00000024369	Nelfe	ortholog_one2one	66.763	62.9428	25	98.23	1	7.85679e-05	13.92	15.71	13.13	14.2533	9.5	10.4	10.77	10.2233	3.24	3.06	2.48	2.92667	2.74	3.27	3.52	3.17667	5.07283e-08	23.6563	24.5369	24.2345	21.9629	23.5976	17.15	17.5321	16.5793	16.6645	17.701	15.9059	16.9221	25.7076	25.0209	25.3102	24.9424	24.5159	24.0649	24.927	23.0148	22.08	20.3596
ENSDARG00000004358	gnb3a	ENSMUSG00000023439	Gnb3	ortholog_one2many	78.8235	78.8235	25	32.5	0	0.000186334	0	0	0	0	0	0.07	0.05	0.04	0.28	0.25	0.16	0.23	0.09	0.03	0.02	0.0466667	0	0	0	0	0	0	0.0984984	0.0330036	0	0.0364106	0.0382512	0.0755774	0.0469569	0.106721	0.314368	0.118595	0.275427	0.367934	0.528388	0.285239	0	0	0
ENSDARG00000004363	lhfp	ENSMUSG00000048332	Lhfp	ortholog_one2many	86	86	25	36.16	0	0.297906	3.4	2.92	3.68	3.33333	113.3	105.64	109.01	109.317	0.04	0.84	0.04	0.306667	0.76	0.93	1.08	0.923333	7.17951e-06	0.512966	0.595602	0.699217	0.790755	0.649635	0.901874	0.535698	0.493417	0.863767	0.716394	0.377457	0.648101	1.68782	2.00618	1.53011	1.62121	1.73549	2.13144	1.78537	0.942429	0.468637	0.936022
ENSDARG00000004372	fmnl3	ENSMUSG00000023008	Fmnl3	ortholog_one2one	68.6239	72.7626	0	38.82	0	1.7847e-10	0.44	0.54	0.83	0.603333	3.09	2.46	2.63	2.72667	0.22	0.27	0.04	0.176667	0.58	0.62	0.43	0.543333	7.31675e-08	0	0	0	0	0	0.154898	0.121103	0.075329	0.114518	0.220564	0.15847	0.140814	0.205124	0.238032	0.331559	0.226881	0.300021	0.383511	0.280855	1.02873	1.02311	1.30303
ENSDARG00000004377	ppp1r13ba	ENSMUSG00000021285	Ppp1r13b	ortholog_one2many	67.1656	66.0534	0	2.39	0	0.00101756	0.64	0.74	0.67	0.683333	6.41	5.6	6.11	6.04	1.46	1.33	1.64	1.47667	0.82	0.78	0.55	0.716667	0	12.4971	13.0921	13.5434	14.6512	13.4459	7.3281	7.12379	8.03874	7.53	6.39769	6.10681	7.08752	13.4676	12.612	11.7941	12.0947	13.9756	13.1369	12.8468	39.0888	39.0447	36.9202
ENSDARG00000004386	si:dkey-153k10.9	ENSMUSG00000056004	9330182L06Rik	ortholog_one2many	64.036	62.3541	25	75.9	1	6.9986e-06	20.15	20.41	20.4	20.32	0.39	0.33	0.25	0.323333	0.05	0.03	0.02	0.0333333	0.04	0.04	0.02	0.0333333	0	0.0682831	0.0226523	0.0868709	0.0866854	0.0661229	0.0545693	0.0658238	0.047768	0.0726189	0.0508599	0.0251225	0.0527937	0.106424	0.0928873	0.065703	0.0261583	0.122304	0.0810645	0.0824236	0	0	0
ENSDARG00000004392	hdr	ENSMUSG00000037613	Tnfrsf23	ortholog_many2many	10.5263	25	50	0	0	2.48715e-06	5.47	4.86	5.44	5.25667	7.5	8.05	7.32	7.62333	0.77	0	0	0.256667	0.27	0.21	0.21	0.23	3.49594e-14	0	0.0267464	0.0293061	0.204705	0.0651893	0.360818	0.207254	0.197404	0.228649	0.240208	0.474607	0.284824	0.307166	0.21935	0.372373	0.216202	0.481361	0.159526	0.292663	0.118499	0.0883884	0.061944
ENSDARG00000004396	b3gnt5b	ENSMUSG00000022686	B3gnt5	ortholog_one2one	47.6309	50.7979	0	0	0	0.232255	0	0	0	0	1.57	1.69	2.3	1.85333	0	0.49	0.31	0.266667	0.26	0.08	0.05	0.13	0.0471807	0	0	0	0	0	0	0	0	0	0	0	0	0.0180161	0.0176901	0	0	0	0	0.00595103	0	0	0
ENSDARG00000004402	elovl6	ENSMUSG00000041220	Elovl6	ortholog_one2one	84.2105	83.8951	50	97.4	1	0.0253939	14.69	17.27	14.81	15.59	11.73	9.81	9.43	10.3233	2.26	1.34	1.2	1.6	90.85	374.03	181.77	215.55	0.0331538	0.644551	0.502022	0.458389	0.56414	0.542275	0.134374	0.162088	0.147033	0.104312	0.0939299	0.170123	0.13531	0.727957	1.05788	0.776593	1.06282	0.953696	1.09789	0.94614	1.88439	1.828	2.2446
ENSDARG00000004405	snx10a	ENSMUSG00000038301	Snx10	ortholog_one2many	54.7059	46.2687	50	18.54	0	0.119567	0	0	0	0	6.32	6.06	5.45	5.94333	0.52	0.06	0.05	0.21	0.5	0.67	0.28	0.483333	0	0.591051	0.617157	0.633957	0.379562	0.555432	0.854867	0.934037	0.874396	0.917108	1.03925	0.834179	0.908973	4.52041	4.7747	4.56466	4.61012	4.65111	4.71624	4.63954	3.93056	3.36732	3.21597
ENSDARG00000004406	spra	ENSMUSG00000033735	Spr	ortholog_one2many	47.4265	49.2366	0	89.06	0	0.000350617	5.47	5.51	7.29	6.09	9.41	6	7.4	7.60333	0.07	0.38	0.28	0.243333	5.6	3.41	5.81	4.94	0.000573157	5.5668	6.17266	6.81884	6.08513	6.16086	3.77841	4.23913	4.05434	3.10882	3.09558	3.59122	3.64458	15.4773	16.5457	15.5557	14.7819	16.7243	15.843	15.8213	6.97706	7.94211	6.82563
ENSDARG00000004415	tcf7l2	ENSMUSG00000024985	Tcf7l2	ortholog_one2one	85.2459	86.9565	50	47.4	0	0.00660182	0.93	0.96	0.79	0.893333	5.86	5.81	4.96	5.54333	0.41	0.51	1.1	0.673333	2.05	1.88	2.09	2.00667	1.01605e-09	0.690861	0.903066	0.719631	0.740535	0.763523	1.09763	1.22262	1.14693	1.1953	1.05988	1.2064	1.15479	2.52851	2.61951	2.36931	2.59524	2.48716	2.77881	2.56309	1.51175	1.31131	1.67556
ENSDARG00000004427	dpy30	ENSMUSG00000024067	Dpy30	ortholog_one2one	68.8679	73.7374	50	70.79	0	7.35602e-05	87.46	85.93	88.13	87.1733	25.02	33.41	26.58	28.3367	22.17	17.12	14.23	17.84	6.65	8.68	7.69	7.67333	0	95.2919	93.0874	96.1447	96.3422	95.2166	94.9333	91.8598	96.11	95.6359	91.3744	95.171	94.1807	92.3801	87.4045	93.3649	93.9915	84.2906	91.2719	90.4506	79.4452	76.0694	84.8705
ENSDARG00000004433	btk	ENSMUSG00000031264	Btk	ortholog_one2one	64.5312	62.6707	50	96.04	1	3.0413e-10	0	0	0	0	1.32	0.86	0.75	0.976667	22.38	22.66	21.9	22.3133	1.35	2.85	0.93	1.71	2.79605e-07	0	0	0	0	0	0.219539	0.248266	0.150138	0.0304327	0.0319712	0.0315846	0.118655	0.0594664	0	0	0.0328869	0.102509	0.0679442	0.0438011	0.189264	0.125486	0.0659569
ENSDARG00000004436	fam92a1	ENSMUSG00000028218	Fam92a	ortholog_one2one	67.1186	55.7746	50	71.45	0	1.53615e-07	35.98	32.58	36.32	34.96	11.89	11.44	12.82	12.05	1.43	0.52	0	0.65	0.64	0.77	0.46	0.623333	1.03049e-10	11.757	11.4519	13.3242	12.7514	12.3211	7.80567	6.78897	7.93525	7.32609	8.04042	7.62462	7.58684	4.23863	4.20118	4.11035	3.95844	4.02094	4.06622	4.09929	4.30587	4.13466	4.34645
ENSDARG00000004445	grm5a	ENSMUSG00000049583	Grm5	ortholog_one2many	73.8075	73.3167	50	40.66	0		0.57	0.71	0.37	0.55	0.1	0.09	0.1	0.0966667	0	0	0	0	0	0	0	0	0	0	0	0	0	0	0	0	0	0	0	0	0	0	0	0	0	0	0	0	0.0193875	0	0
ENSDARG00000004451	tnfrsfa	ENSMUSG00000037613	Tnfrsf23	ortholog_many2many	11.4679	28.4091	25	0	0	1.09069e-05	9.17	8.68	7.6	8.48333	4.5	5.2	5.5	5.06667	9.49	12.35	11.41	11.0833	4.59	3.31	4.22	4.04	3.49594e-14	0	0.0267464	0.0293061	0.204705	0.0651893	0.360818	0.207254	0.197404	0.228649	0.240208	0.474607	0.284824	0.307166	0.21935	0.372373	0.216202	0.481361	0.159526	0.292663	0.118499	0.0883884	0.061944
ENSDARG00000004452	tardbpl	ENSMUSG00000041459	Tardbp	ortholog_one2many	74.9398	75.1208	50	97.81	1	4.62076e-06	112.31	107.79	104.8	108.3	45.72	49.17	44.27	46.3867	16.94	19.89	12.44	16.4233	13.65	14.5	13.96	14.0367	1.36079e-09	6.26477	6.10831	6.07529	6.31387	6.19056	8.65711	8.65758	8.50234	8.93668	8.93646	8.71358	8.73396	8.86336	9.35154	8.82187	8.76733	8.55724	9.44086	8.96703	6.28151	6.50059	5.92777
ENSDARG00000004455	p2rx5	ENSMUSG00000005950	P2rx5	ortholog_one2many	43.2225	37.1429	25	30.63	0	0.00779091	1.37	1.37	1.21	1.31667	0	0	0	0	0.54	0.46	0.72	0.573333	0.08	0.07	0.07	0.0733333	5.39754e-11	2.1446	2.17181	2.74891	2.53834	2.40092	0	0	0	0	0	0	0	0	0	0	0	0.0449271	0	0.00748785	0.995394	1.11369	1.08402
ENSDARG00000004460	desi2	ENSMUSG00000026502	Desi2	ortholog_one2one	80.102	80.9278	50	57.58	0	0.000287931	24.66	24.63	25.72	25.0033	11.78	11.33	13.57	12.2267	20.48	23.73	33.76	25.99	0.49	0.72	0.32	0.51	0	7.34194	7.20893	7.33004	7.0895	7.2426	4.51145	3.8044	4.54401	4.32273	4.33233	4.63842	4.35889	1.88159	1.93791	1.63639	1.77578	1.78629	1.81101	1.80483	6.12959	6.16081	6.9074
ENSDARG00000004470	prkcsh	ENSMUSG00000003402	Prkcsh	ortholog_one2one	59.1682	59.2803	25	65.45	0	6.57845e-05	95.36	87.79	89.79	90.98	57.06	64.8	60.1	60.6533	16.08	16.93	29.85	20.9533	24.65	20.06	21.86	22.19	0.00520406	25.6948	27.2651	23.8214	26.4009	25.7956	27.4316	30.8107	31.7538	29.8019	27.1573	26.8784	28.9723	25.5819	24.8449	23.3112	24.797	24.7486	25.1901	24.7456	29.6071	28.66	31.2115
ENSDARG00000004472	atat1	ENSMUSG00000024426	Atat1	ortholog_one2one	46.5574	33.7292	0	69.77	0	0.000410871	1.09	0.8	0.64	0.843333	0.4	0.44	0.67	0.503333	1.44	0.41	0.12	0.656667	0.03	0.11	0.04	0.06	1.12649e-09	6.11088	6.04259	5.74238	5.75151	5.91184	7.04744	6.36432	7.07217	7.25119	6.16884	6.83163	6.78926	5.67577	6.37492	5.92158	5.91647	6.0534	5.38856	5.88845	4.59188	4.54523	4.144
ENSDARG00000004473	tbx21	ENSMUSG00000001444	Tbx21	ortholog_one2one	41.3793	47.5472	75	23.05	0	0.76612	0	0	0	0	0.9	1.31	1.15	1.12	0.12	0	0	0.04	0.08	0.13	0.06	0.09	0.153499	0	0	0	0	0	0	0	0	0	0	0	0	0	0	0	0	0	0	0	0	0	0
ENSDARG00000004492	pcyt1ab	ENSMUSG00000005615	Pcyt1a	ortholog_one2many	75.2089	73.5695	0	10.8	0	5.14064e-07	6.18	6.32	5.42	5.97333	8.15	10.43	7.99	8.85667	3.81	3.19	3.47	3.49	2.14	1.85	1.19	1.72667	0.611098	4.59094	4.75615	4.45953	4.5864	4.59826	6.31102	5.96624	6.19855	6.31553	5.98707	6.57185	6.22504	4.31436	4.46008	4.88485	4.55588	5.14521	4.89224	4.70877	6.16615	5.7717	5.68814
ENSDARG00000004497	tspan33a	ENSMUSG00000001763	Tspan33	ortholog_one2one	73.6655	73.1449	25	92.43	1	3.15536e-05	0	0	0	0	0	0	0	0	0	0	0	0	0	0	0	0	0.00197906	0.138766	0.138103	0.11349	0.169871	0.140058	2.37873	1.9898	2.11137	1.69713	1.86045	1.85709	1.98243	1.82033	2.05284	1.78252	1.47517	1.80197	1.95629	1.81485	0.745707	0.665564	0.679667
ENSDARG00000004498	xkr8.1	ENSMUSG00000037752	Xkr8	ortholog_one2many	28.9673	28.6783	75	2.36	0	0.0262894	0	0	0	0	0	0	0	0	1.39	2.23	0.43	1.35	0	0.02	0	0.00666667	0.108967	1.10758	1.14389	1.25336	1.3189	1.20593	0.440898	0.423046	0.372789	0.466718	0.303526	0.392119	0.399849	0.303993	0.469057	0.530854	0.552388	0.449167	0.496188	0.466941	0.990555	1.05387	0.794764
ENSDARG00000004502	rcor3	ENSMUSG00000037395	Rcor3	ortholog_one2one	74.223	73.6842	25	95.72	1	0.6004	0.06	0.41	0.2	0.223333	0.33	0.31	0.18	0.273333	1.77	0.15	0.04	0.653333	1.06	0.55	0.54	0.716667	7.0231e-12	3.98477	4.28575	3.81933	3.97363	4.01587	2.80822	3.01101	2.95226	2.76006	3.33581	3.11802	2.99756	2.49377	2.50722	2.26738	2.1248	2.08427	2.33124	2.30145	2.8735	2.87038	2.77919
ENSDARG00000004517	ppat	ENSMUSG00000029246	Ppat	ortholog_one2one	73.2283	71.9536	75	82.61	1	0.0596676	1.21	0.88	1.4	1.16333	0.88	1.19	0.59	0.886667	2.08	1.92	5.76	3.25333	0.64	0.46	0.96	0.686667	3.61705e-11	3.81153	3.71218	3.86741	4.01441	3.85138	14.2495	15.1489	14.9075	14.9136	15.1665	15.613	14.9998	7.22184	6.32172	6.58974	6.98057	6.83911	6.75117	6.78402	4.06675	4.04451	4.18121
ENSDARG00000004525	zgc:63882	ENSMUSG00000020441	2310033P09Rik	ortholog_one2one	44.1176	51.9231	75	45.56	0	0.0400235	15.92	16.31	15.65	15.96	15.73	16.54	16.7	16.3233	1.76	6.23	5.88	4.62333	1.3	1.15	1.28	1.24333	3.43176e-08	19.9156	18.983	18.8115	19.0766	19.1967	11.9032	10.8159	12.7302	13.4986	10.4203	11.6875	11.8426	17.123	16.67	17.1658	14.9901	11.723	13.57	15.207	12.059	13.3	13.0923
ENSDARG00000004527	pin4	ENSMUSG00000079480	Pin4	ortholog_one2one	84.375	82.4427	0	71.71	0	0.000164235	32.01	27.58	29.97	29.8533	34.14	40.38	34.57	36.3633	17.9	12.73	12.54	14.39	7.45	9.56	8.17	8.39333	1.77959e-15	56.6135	54.8278	49.509	54.3738	53.831	46.4602	49.9043	46.0438	47.6955	40.5183	43.8479	45.745	41.8529	46.4619	44.4319	42.7924	39.8336	40.7536	42.6877	39.214	36.7233	47.8567
ENSDARG00000004537	kmt2a	ENSMUSG00000002028	Kmt2a	ortholog_one2one	46.812	49.836	25	61.97	0	1.46212e-06	3.1	2.87	2.9	2.95667	1.61	2.02	2	1.87667	1.06	1.16	1.16	1.12667	2.47	2.2	1.5	2.05667	1.07258e-07	0.983815	1.21583	0.978507	1.05288	1.05776	1.7418	1.91239	1.5542	1.78213	1.90242	1.83765	1.78843	0.769483	0.821737	0.842615	0.993984	0.890753	0.962611	0.880197	1.76378	1.71858	1.85645
ENSDARG00000004539	ptgs2a	ENSMUSG00000032487	Ptgs2	ortholog_one2many	66.5557	66.2252	75	0	1	0.00775217	0	0	0	0	6.14	6.68	7.99	6.93667	4.1	2.54	6.44	4.36	1.48	0.05	0.12	0.55	0.000718408	0	0	0	0	0	0.0377362	0.0379325	0.0825823	0.0209242	0.0659458	0.0651484	0.0517116	0.0817727	0.120439	0.090871	0.0678345	0.046987	0.0233577	0.071877	0	0	0
ENSDARG00000004561	prkcg	ENSMUSG00000078816	Prkcg	ortholog_one2one	69.2661	64.9928	50	0	0	0.00796342	0.29	0.19	0.4	0.293333	0	0	0	0	0.04	0	0	0.0133333	0.08	0.03	0.02	0.0433333	3.3612e-14	0.0249477	0	0	0	0.00623692	0.0239247	0	0	0	0	0.0275359	0.00857677	0.285141	0.381791	0.345672	0.458741	0.148948	0.444261	0.344092	0.357507	0.601703	0.517521
ENSDARG00000004574	gtf3c2	ENSMUSG00000106864	Gtf3c2	ortholog_one2many	36.3423	34.1786	50	13.41	0	0.000372178	8.72	9.23	9.17	9.04	7.86	7.46	8.03	7.78333	0.13	0.34	1.86	0.776667	1.11	0.77	1.03	0.97	0	11.0511	10.5474	9.64071	9.91889	10.2895	14.9161	15.6421	14.2037	15.1253	15.2764	15.0614	15.0375	12.9661	11.5129	11.936	10.6811	11.5895	11.9951	11.7801	12.2273	12.2508	11.9449
ENSDARG00000004576	plk4	ENSMUSG00000025758	Plk4	ortholog_one2one	50.2657	51.1351	25	45.94	0	0.234524	2.16	1.72	2.23	2.03667	2.59	2.06	1.86	2.17	0.19	0.03	0.32	0.18	0.05	0.13	0.04	0.0733333	9.00455e-12	1.58305	1.42253	1.52515	1.22086	1.4379	1.04648	1.11119	1.12894	1.16052	1.06464	1.05177	1.09392	2.29962	2.02279	1.93436	1.87232	1.76183	1.93411	1.97084	1.27066	1.44906	2.07238
ENSDARG00000004577	TMEM178B (1 of many)	ENSMUSG00000057716	Tmem178b	ortholog_one2many	37.7104	80.5755	0	0.01	0	3.44415e-08	7.2	8.3	6.66	7.38667	0	0.04	0.03	0.0233333	0.07	0.74	0	0.27	0.02	0.03	0.03	0.0266667	0	0.120084	0.11951	0.183327	0.130668	0.138397	0.11516	0.162062	0.176412	0.127709	0.0268329	0.0795254	0.114617	0	0	0	0.0276015	0	0	0.00460025	0.0529488	0	0.0276783
ENSDARG00000004580	nmnat2	ENSMUSG00000042751	Nmnat2	ortholog_one2one	85.8553	85.0163	75	64.49	1	2.59828e-06	63.74	62.93	60.68	62.45	1.93	1.61	1.68	1.74	1.18	1.97	1.32	1.49	0.01	0	0.01	0.00666667	3.52042e-12	2.66545	3.11811	2.61764	2.71382	2.77875	0.328862	0.300521	0.294416	0.298389	0.296058	0.378501	0.316125	0.534472	0.47709	0.341965	0.394108	0.297804	0.277577	0.387169	0.89349	0.854426	0.898194
ENSDARG00000004581	sel1l	ENSMUSG00000020964	Sel1l	ortholog_one2one	71.5206	70.2532	0	41.06	0	5.82683e-06	24.02	23.38	21.55	22.9833	2.49	2.37	2.21	2.35667	7.21	7.58	9.64	8.14333	10.26	7.51	9.01	8.92667	2.63574e-13	34.5803	34.3103	33.6542	33.697	34.0604	71.7995	71.5942	71.8653	70.1466	72.304	71.8366	71.591	43.6027	43.4798	42.3852	42.3564	44.0086	44.4044	43.3728	44.3191	45.9359	45.242
ENSDARG00000004586	ntrk1	ENSMUSG00000028072	Ntrk1	ortholog_one2one	51.4429	51.3141	0	5.16	0	8.20438e-06	0.43	0.58	0.55	0.52	0	0	0	0	0	0	0.03	0.01	0.00712	0.00549	0	0.00420333	0.380764	0	0	0	0	0	0	0	0	0	0	0	0	0	0	0	0	0	0	0	0	0	0
ENSDARG00000004587	kat5a	ENSMUSG00000024926	Kat5	ortholog_one2many	79.1822	83.0409	0	84.3	1	7.93357e-07	47.79	48.18	48.2	48.0567	38.09	41.18	38.71	39.3267	5.85	5.85	5.42	5.70667	3.5	3.82	3.17	3.49667	1.32248e-12	13.5077	13.9791	12.5765	12.2567	13.08	13.212	13.3672	15.3984	14.0313	13.2364	15.7016	14.1578	21.4957	20.603	20.5711	21.5064	20.1483	19.8719	20.6994	22.6069	22.5817	25.2382
ENSDARG00000004592	gpr22a	ENSMUSG00000044067	Gpr22	ortholog_one2many	70.8696	69.5096	50	56.46	0	2.95984e-06	0	0	0	0	0	0	0	0	0	0	0	0	0	0	0	0	4.19565e-07	0.0195553	0.0973097	0.0639735	0.021279	0.0505294	0.0562604	0.037702	0.123121	0.0831881	0.0655451	0.0215842	0.0645667	0.121914	0.139659	0.0677392	0.0449482	0.0467015	0	0.0701602	0	0	0
ENSDARG00000004594	znf800a	ENSMUSG00000039841	Zfp800	ortholog_one2one	45.1977	48.3384	25	35.72	0	0.000879155	0.23	0.3	0.31	0.28	0.05	0	0.02	0.0233333	1.72	1.43	0.55	1.23333	0.21	0.27	0.31	0.263333	6.91667e-13	5.35331	4.64089	4.5562	4.95241	4.8757	4.04264	4.6031	4.38433	4.6617	4.18881	4.17933	4.34332	3.70178	3.93927	4.24287	4.4374	3.47457	4.36239	4.02638	4.29733	4.35562	4.40676
ENSDARG00000004597	lrrc4ba	ENSMUSG00000047085	Lrrc4b	ortholog_one2many	66.3923	68.2652	0	62.13	0	0.123353	0	0	0	0	0.17	0.13	0.13	0.143333	0.22	0.11	0	0.11	0	0	0	0	0	0	0	0	0	0	0.0295036	0	0.0322829	0.0654371	0.0687451	0.0679138	0.0439804	0	0	0.0710463	0	0	0.0365238	0.0179284	0	0	0
ENSDARG00000004616	mtmr2	ENSMUSG00000031918	Mtmr2	ortholog_one2one	73.871	71.2286	25	22.08	0	0.000347821	11.48	12.19	9.77	11.1467	11.25	12.83	10.73	11.6033	4.56	2.97	6.19	4.57333	1.15	1.64	1.2	1.33	1.69181e-11	9.81262	9.2729	10.7404	10.3382	10.041	8.05587	8.29227	9.21894	9.73346	8.23779	9.39332	8.82194	8.3091	8.15871	7.79349	7.06144	9.13278	8.53561	8.16519	7.37964	7.05778	7.39817
ENSDARG00000004618	stx2a	ENSMUSG00000029428	Stx2	ortholog_one2many	41.629	31.8339	0	0	0	0.000635891	2.89	3.53	3.13	3.18333	3.31	3.53	3.24	3.36	0.08	0.92	0.6	0.533333	2.71	4.84	4.04	3.86333	1.83795e-12	2.41685	2.36619	2.27124	2.50159	2.38897	2.69461	2.61392	2.5567	2.36134	2.83196	2.6459	2.6174	1.6129	1.94455	1.58816	1.58074	1.85356	1.42295	1.66714	4.54856	3.64049	3.80433
ENSDARG00000004621	gpm6ab	ENSMUSG00000031517	Gpm6a	ortholog_one2many	84.8921	84.8921	100	37.84	1	0.00155575	1.82	0.96	0.89	1.22333	17.95	16.35	16.61	16.97	10.27	11.83	5.57	9.22333	0.94	1.16	0.85	0.983333	0	6.36242	6.13678	6.11281	6.03876	6.16269	1.42459	1.35094	1.41173	1.4904	1.87889	1.39213	1.49145	2.97053	2.54502	2.88032	3.06012	3.04561	2.69525	2.86614	23.265	21.3556	22.5464
ENSDARG00000004627	panx3	ENSMUSG00000011118	Panx3	ortholog_one2one	44.8198	50.7653	0	100	0	0.00171313	1.13	1.82	1.6	1.51667	0.56	0.73	0.28	0.523333	0	0	0	0	0.1	0.00964	0.01	0.03988	1	0	0	0	0	0	0	0	0	0	0	0	0	0	0	0	0	0	0	0	0	0	0
ENSDARG00000004633	epn3b	ENSMUSG00000010080	Epn3	ortholog_one2many	52.0211	46.5409	25	63.42	0	0	0.68	0.7	0.4	0.593333	0.07	0.11	0.18	0.12	0	0	0	0	0.01	0	0	0.00333333	1.50147e-09	17.3265	17.773	16.188	17.383	17.1676	96.8913	96.4341	96.0447	96.0212	94.3648	93.3215	95.5129	41.5774	40.9154	38.7843	38.0427	39.4473	40.7974	39.9274	20.1253	22.0313	21.7555
ENSDARG00000004634	osbp	ENSMUSG00000024687	Osbp	ortholog_one2one	70.2632	66.3354	0	77.38	1	0.00360326	0.61	0.52	1.23	0.786667	1.12	0.82	0.68	0.873333	1.18	3.16	3.86	2.73333	7.61	4.69	7.33	6.54333	2.80956e-07	20.1953	19.5895	19.5539	19.5764	19.7288	28.0314	29.0311	27.863	28.1344	28.9409	28.4171	28.403	8.42627	9.17746	9.00016	8.82234	10.4122	9.76777	9.2677	10.3715	10.4874	10.7978
ENSDARG00000004635	epha7	ENSMUSG00000028289	Epha7	ortholog_one2one	85.4331	86.9739	50	52.13	0	2.61534e-07	6.37	8.14	8.17	7.56	4.98	5.59	6	5.52333	0.35	0.22	0.01	0.193333	0.16	0.2	0.1	0.153333	0	7.22967	7.19514	6.97904	6.95423	7.08952	0.987961	1.04583	1.148	1.18288	1.25286	1.2679	1.14757	9.45392	9.75719	8.78992	8.88502	10.0807	9.9575	9.48738	13.0748	13.2631	13.5327
ENSDARG00000004636	ccdc9	ENSMUSG00000041375	Ccdc9	ortholog_one2one	31.8248	37.0119	0	93.35	0	9.69589e-07	28.13	32.34	30.07	30.18	8.52	9.85	8.5	8.95667	1.18	2.18	4.93	2.76333	2.13	2.8	2.1	2.34333	5.6358e-08	2.11083	1.88904	2.1412	2.3681	2.12729	2.51072	2.58688	2.43818	2.97574	2.7971	2.384	2.61544	1.39416	1.13521	1.11473	0.95907	1.15279	0.932441	1.11473	1.15439	1.34541	1.24461
ENSDARG00000004643	cdhr1a	ENSMUSG00000021803	Cdhr1	ortholog_one2many	52.3416	44.2375	50	19.59	0	5.89069e-05	37.06	35.08	37.6	36.58	1.46	0.76	1.43	1.21667	0.07	0	0.33	0.133333	0.07	0.04	0.02	0.0433333	0	0	0	0	0	0	0	0	0	0	0	0	0	0	0	0	0	0	0	0	0	0	0
ENSDARG00000004648	kctd16a	ENSMUSG00000051401	Kctd16	ortholog_one2many	66.7476	64.4028	25	0	0	0.000301793	0	0	0	0	0	0.06	0.04	0.0333333	0.31	0.46	0.23	0.333333	0	0	0	0	0.00325386	0	0	0	0	0	0	0	0	0	0	0	0	0	0	0	0	0	0	0	0	0	0
ENSDARG00000004658	zgc:101810	ENSMUSG00000099104	Gm17087	ortholog_one2many	16.7513	42.3077	0	0	0	0.550856	0	0	0	0	5.05	6.23	4.73	5.33667	5.84	5.11	2.73	4.56	1.05	0.02	0.16	0.41	6.31352e-11	0	0	0	0	0	0	0	0	0	0	0	0	0	0	0	0	0	0	0	0	0	0
ENSDARG00000004672	ptk2ab	ENSMUSG00000022607	Ptk2	ortholog_one2many	81.5238	81.3688	50	90.97	1	8.2399e-06	9.77	11.17	7.91	9.61667	60.28	68.05	61.83	63.3867	0.46	0.93	0.86	0.75	7.32	4.59	7.05	6.32	1.92061e-12	4.8206	5.15695	4.3117	4.36143	4.66267	5.21162	4.97766	5.96782	5.08829	4.98242	5.87871	5.35109	7.89784	8.10489	8.21371	8.79779	8.70979	8.70229	8.40439	10.986	10.5499	11.4024
ENSDARG00000004680	dnajb6a	ENSMUSG00000029131	Dnajb6	ortholog_many2many	67.0886	43.5616	0	14.33	0	0.0023783	1.24	2.5	2.23	1.99	1.32	1.64	1.43	1.46333	6.34	3.8	7.66	5.93333	7.47	7.82	9.35	8.21333	3.28845e-08	53.4988	50.6987	54.3188	52.65	52.7916	64.2774	64.8123	66.8854	65.6538	68.1091	66.9081	66.1077	33.8717	35.9127	37.1769	37.3618	35.8549	37.6418	36.3033	33.1653	32.5113	30.5106
ENSDARG00000004687	acaa1	ENSMUSG00000036138	Acaa1a	ortholog_one2many	72.488	71.4623	50	80.42	1	4.89942e-07	29.45	33.03	33.95	32.1433	20.3	21.67	19.85	20.6067	5.26	10.06	12.63	9.31667	124.13	155.65	145.07	141.617	0.00325386	10.6565	11.0526	9.4835	11.3515	10.636	8.14432	9.97752	8.89013	8.18507	8.16548	8.6526	8.66919	23.4817	20.0783	22.8414	20.5291	22.7926	24.7208	22.4073	16.4278	15.1518	13.9752
ENSDARG00000004692	nabp1a	ENSMUSG00000026107	Nabp1	ortholog_one2many	58.2938	62.1212	0	100	1	5.73146e-08	52.49	48.69	47.89	49.69	11.43	13.18	12.84	12.4833	22.26	24.49	22.23	22.9933	5.44	2.21	2.8	3.48333	0	0.913103	0.908742	0.921405	0.874949	0.90455	1.92123	1.37944	1.48728	1.72476	2.17738	1.69978	1.73164	10.9603	9.6913	10.4488	10.9951	10.3988	10.1445	10.4398	2.05815	2.03195	2.23027
ENSDARG00000004695	six4a	ENSMUSG00000034460	Six4	ortholog_one2many	44.878	35.6129	100	0	0	2.39991e-07	48.35	50.94	44.14	47.81	26.21	29.08	25.5	26.93	0	0	0	0	0	0	0	0	0	6.10148	5.67578	6.29139	5.53725	5.90148	7.85744	7.90632	8.32761	8.96086	8.71825	8.49371	8.37737	3.57096	3.94674	3.14395	3.5681	3.65772	3.48874	3.5627	3.70608	3.96793	3.71197
ENSDARG00000004696	eefsec	ENSMUSG00000033216	Eefsec	ortholog_one2one	63.7153	62.9503	25	93.86	1	2.48654e-05	1.35	1	1.52	1.29	3.67	3.89	3.87	3.81	2.45	3.31	2.94	2.9	3.39	4.39	4.55	4.11	1.28046e-13	14.6378	15.2403	14.3483	14.9128	14.7848	16.8759	17.8321	15.9001	15.4304	16.1385	16.3695	16.4244	39.4442	39.6493	37.2208	35.6048	36.5326	38.6512	37.8505	16.4903	15.2363	14.682
ENSDARG00000004697	rxrgb	ENSMUSG00000015843	Rxrg	ortholog_one2one	72.5664	70.8423	0	67.36	0	9.18758e-05	0	0.02	0	0.00666667	4	3.06	4.24	3.76667	1.08	3.16	2.01	2.08333	22.34	17.62	15.06	18.34	5.57254e-12	8.47365	6.7934	8.89803	8.58022	8.18632	17.3434	17.5849	19.5947	20.1511	17.4005	17.4932	18.2613	13.696	12.8877	11.3243	12.6239	12.5542	13.1802	12.711	8.38938	8.17147	9.72032
ENSDARG00000004702	irf2bp2a	ENSMUSG00000051495	Irf2bp2	ortholog_one2many	50.9506	23.5088	0	84.65	1	0.00551672	90.64	101.46	89.78	93.96	31.12	35.73	32.32	33.0567	12.51	10.38	21.35	14.7467	7.28	5.31	3.8	5.46333	4.5414e-11	4.09757	4.92537	4.08141	4.28502	4.34734	4.57596	4.78786	4.00191	4.54639	4.7564	4.42479	4.51555	14.0629	13.0121	13.2722	12.2316	14.6362	14.7832	13.6664	8.8382	6.92299	7.56382
ENSDARG00000004706	syf2	ENSMUSG00000028821	Syf2	ortholog_one2one	79.4118	78.0992	0	93.17	1	6.86502e-09	82.77	85.14	83.69	83.8667	72.21	84.25	73.6	76.6867	19.89	22.21	18.41	20.17	9.55	12.05	9.57	10.39	1.83649e-13	45.254	40.1214	45.5965	45.6911	44.1658	46.8245	49.7042	43.9228	47.33	51.3488	48.0017	47.8553	58.1119	57.6901	65.0869	63.2111	60.726	60.113	60.8232	63.1582	62.6678	58.3548
ENSDARG00000004712	tbr1b	ENSMUSG00000035033	Tbr1	ortholog_one2one	81.0651	80.4699	75	70.95	1	0.711779	0	0	0	0	0.01	0	0.02	0.01	0.07	0	0	0.0233333	0	0	0	0	0.0899377	0	0	0	0	0	0	0	0	0	0	0	0	0	0	0	0	0	0	0	0	0	0
ENSDARG00000004713	mad2l1	ENSMUSG00000029910	Mad2l1	ortholog_one2one	74.7525	73.6585	0	51.59	0	0.00269127	0	0	0	0	0	0	0	0	6.72	2.84	5.14	4.9	1.25	0.76	0.61	0.873333	3.77034e-10	1.29957	1.19717	1.2766	1.09857	1.21798	0.576793	0.776509	0.822722	0.788135	0.827977	0.806111	0.766375	1.77439	1.80802	1.77339	1.78979	1.68005	1.50458	1.7217	1.97717	1.62489	2.42603
ENSDARG00000004714	tcf12	ENSMUSG00000032228	Tcf12	ortholog_one2one	67.2176	69.1218	50	94.13	1	4.9244e-05	8.89	8.97	7.71	8.52333	11.04	10.95	9.38	10.4567	1.36	0.52	0.54	0.806667	0.91	0.79	0.73	0.81	6.02878e-09	1.71274	1.72846	1.53605	1.52406	1.62533	1.68089	1.78221	1.52849	1.3874	1.68108	1.70492	1.6275	2.51143	2.3435	2.3288	2.52026	2.58034	2.68894	2.49555	2.56733	2.29007	2.43505
ENSDARG00000004721	mpp5b	ENSMUSG00000021112	Mpp5	ortholog_one2many	54.7731	51.8519	100	0	1	0.0158213	0.15	0.27	0.26	0.226667	0.37	0.15	0.61	0.376667	0	0	0.11	0.0366667	0.03	0.04	0.00935	0.02645	0	20.8766	21.7694	20.109	20.7955	20.8876	10.5355	11.8825	11.0819	11.1619	11.4522	11.2596	11.229	9.35958	9.42369	8.64544	8.7741	9.62391	8.90838	9.12252	12.0381	12.1335	12.3217
ENSDARG00000004724	tcea3	ENSMUSG00000001604	Tcea3	ortholog_one2one	53.7897	63.4006	0	61.3	0	4.0105e-05	2.98	3.7	3.83	3.50333	14.72	14.73	15.37	14.94	36.26	35.19	23.9	31.7833	7.8	12.14	9.2	9.71333	1.37481e-06	5.98594	5.18867	5.75542	7.56413	6.12354	5.12323	6.14263	5.40324	5.33925	4.74621	5.89655	5.44185	23.7418	22.7868	21.1811	21.3039	23.1341	22.7711	22.4865	13.126	14.6066	11.4976
ENSDARG00000004726	trappc11	ENSMUSG00000038102	Trappc11	ortholog_one2one	76.8551	76.7873	25	100	1	1.19543e-07	22.77	21.51	21.67	21.9833	4.82	6.17	5.58	5.52333	6.47	4.62	5.22	5.43667	3.92	4.61	4.53	4.35333	2.9472e-05	13.3735	13.1297	12.9461	13.2967	13.1865	10.3054	9.55493	10.3426	9.75772	10.9655	11.2472	10.3622	8.27675	8.36806	9.47052	8.88303	8.76473	9.02762	8.79845	7.52422	7.39163	8.23487
ENSDARG00000004727	cmss1	ENSMUSG00000022748	Cmss1	ortholog_one2one	46.5753	49.2754	25	21.65	0	0.00290237	29.63	29.41	31.25	30.0967	11.74	10.9	12.53	11.7233	6.07	12.77	7.52	8.78667	2.21	3.28	3.65	3.04667	7.98574e-10	2.42234	2.60363	2.32451	2.21411	2.39115	1.85841	2.70871	1.72846	2.26701	2.48987	1.92503	2.16291	8.15485	7.21642	6.48897	6.56998	5.90066	6.0966	6.73792	3.63149	4.03653	2.79164
ENSDARG00000004735	hnrnpub	ENSMUSG00000039630	Hnrnpu	ortholog_one2many	51.6129	50	25	69.3	0	0.000607352	28.67	25.04	27.31	27.0067	18.07	18.87	17.19	18.0433	14.75	22.28	38.42	25.15	13.58	10.1	12.51	12.0633	1.06314e-11	21.6673	21.1618	21.408	20.052	21.0723	26.1431	25.6949	27.6847	26.7198	27.3414	27.2509	26.8058	23.7081	23.9607	22.6592	24.8656	25.5295	24.8192	24.2571	20.9043	21.8546	22.7592
ENSDARG00000004745	lmbr1l	ENSMUSG00000022999	Lmbr1l	ortholog_one2one	68.8391	69.1207	50	37.6	0	2.99477e-06	0	0	0	0	1.55	2.12	1.23	1.63333	0.13	0.56	0	0.23	24.43	19.28	20.29	21.3333	0.0562809	1.51716	1.42485	2.00395	1.34861	1.57364	1.80332	2.05989	2.24227	1.99983	2.0293	1.98118	2.0193	0.910321	1.09005	0.937586	0.908643	1.42889	1.24305	1.08642	1.3662	1.40558	1.47758
ENSDARG00000004748	zgc:100868	ENSMUSG00000048992	Prss32	ortholog_many2many	31.3099	29.3413	75	0	0	0.620199	0	0.01	0	0.00333333	3.33	3.24	3.18	3.25	0	0.05	0.02	0.0233333	0.75	0.0045	0.03	0.2615	0.00251302	0	0	0	0	0	0.0942891	0.0947795	0.154757	0.104564	0.0549248	0	0.0838858	0	0	0	0	0	0	0	0	0	0
ENSDARG00000004753	mylkb	ENSMUSG00000022836	Mylk	ortholog_one2many	59.2132	29.3333	0	6.81	0	6.008e-07	0	0	0	0	0.12	0.12	0.13	0.123333	0.05	0	0	0.0166667	0.19	0.18	0.06	0.143333	6.09531e-06	0.0443503	0.0706216	0.0193451	0.00965189	0.0359922	0.153114	0.14536	0.158231	0.132066	0.0991015	0.166435	0.142385	0.41474	0.380085	0.368708	0.336402	0.39189	0.368563	0.376731	0.547553	0.476489	0.64401
ENSDARG00000004754	hspa4a	ENSMUSG00000020361	Hspa4	ortholog_one2many	72.9892	72.209	50	10.32	0	0.0201234	22.93	23.98	22.67	23.1933	18.18	19.13	16.69	18	5.42	9.41	16.73	10.52	7.22	6.17	8.45	7.28	1.41272e-05	17.4093	18.2184	18.7888	17.9327	18.0873	13.3188	13.231	13.4104	12.8632	12.4207	12.3065	12.9251	8.57031	8.16574	9.10979	9.06718	8.81747	8.84389	8.7624	10.5477	10.4007	11.5158
ENSDARG00000004757	ybx1	ENSMUSG00000028639	Ybx1	ortholog_one2one	72.4919	69.5652	25	100	1	0.0316857	616.79	662.94	613.11	630.947	1032.66	1157.18	1043.36	1077.73	142.26	156.94	357.51	218.903	463.04	283.42	361.91	369.457	0.00187468	37.7391	41.5273	39.3286	39.051	39.4115	22.193	23.5783	23.8727	22.9075	22.9517	24.5997	23.3505	27.7449	28.9863	26.6387	27.0052	26.6981	30.1787	27.8753	28.8067	28.7662	26.7521
ENSDARG00000004771	ankrd10b	ENSMUSG00000031508	Ankrd10	ortholog_one2many	43.8202	37.5904	25	68.99	0	6.07149e-05	16.3	15.34	14.21	15.2833	15.68	15.55	18.39	16.54	8.39	6.73	10.01	8.37667	2.01	3.13	2.71	2.61667	9.28601e-12	2.18903	2.46586	2.25591	2.36889	2.31992	3.12583	2.88701	2.80187	2.68618	2.72791	3.07991	2.88478	3.46175	3.3991	2.80533	2.98573	3.54742	3.06998	3.21155	2.25393	2.03063	1.899
ENSDARG00000004774	wdr36	ENSMUSG00000038299	Wdr36	ortholog_one2one	64.9554	64.7386	25	9.18	0	0.00205178	4.43	4.01	3.79	4.07667	8.78	9.68	9.74	9.4	6.76	9.7	13.06	9.84	2.22	3.08	3.32	2.87333	1.7176e-09	8.0471	6.724	6.91827	6.51499	7.05109	4.50385	4.31547	4.7264	4.05996	3.80493	3.63766	4.17471	4.9369	4.53932	5.16907	5.08177	4.91925	5.44509	5.01523	3.45134	3.46257	4.01976
ENSDARG00000004782	fgfr3	ENSMUSG00000054252	Fgfr3	ortholog_one2one	71.5507	73.1586	50	1.13	0	1.19855e-05	1.72	1.93	1.77	1.80667	0.87	0.88	1.06	0.936667	0.06	0.34	0.02	0.14	0.11	0.05	0.04	0.0666667	0	0.679798	0.701609	0.645205	0.794511	0.705281	31.1836	31.6007	32.5493	32.8412	32.5745	32.264	32.1689	13.7475	13.9996	12.8206	13.1657	13.7544	13.4806	13.4948	21.3013	20.6189	22.9664
ENSDARG00000004785	cops2	ENSMUSG00000027206	Cops2	ortholog_one2one	99.3228	97.7778	50	100	1	4.67208e-08	36.29	34.85	34.2	35.1133	11.41	12	12.55	11.9867	20.99	21.97	19.52	20.8267	8.74	12.3	10.03	10.3567	9.76305e-07	28.5643	28.2005	29.515	30.1151	29.0987	19.1873	19.2382	20.5419	21.7642	21.1056	21.551	20.5647	21.6333	21.1122	23.2487	23.4026	23.6484	23.5117	22.7595	17.9967	18.8726	19.1956
ENSDARG00000004794	ccdc146	ENSMUSG00000064280	Ccdc146	ortholog_one2one	36.0465	31.7298	25	13.39	0	0.00349405	0	0	0	0	0.25	0.48	0.27	0.333333	1.09	0.7	0.5	0.763333	0.03	0.09	0.06	0.06	0.0758193	0	0	0	0	0	0	0	0	0	0	0	0	0	0	0	0	0	0	0	0	0	0
ENSDARG00000004796	mgrn1b	ENSMUSG00000022517	Mgrn1	ortholog_one2many	71.0383	73.1707	0	64.1	0	4.74547e-06	7	7.44	7.51	7.31667	2.1	1.84	1.98	1.97333	2.76	7.78	3.82	4.78667	2.44	1.89	1.25	1.86	1.36839e-13	37.9818	37.5008	35.7484	35.4934	36.6811	21.5187	22.8177	22.2537	22.9614	21.8598	21.1726	22.0973	49.3028	52.2632	51.2496	49.7205	51.0391	51.0363	50.7686	50.6162	50.3694	50.742
ENSDARG00000004806	grwd1	ENSMUSG00000053801	Grwd1	ortholog_one2one	58.8496	59.6413	0	50.14	0	0.00117722	2.06	2.94	2.86	2.62	10.74	11.85	9.86	10.8167	4.65	7.69	8.51	6.95	5.02	2.76	3.99	3.92333	2.24088e-07	59.5775	58.1594	55.0313	55.7719	57.135	29.1134	28.6314	32.6834	33.2642	31.1282	29.9298	30.7917	10.196	10.0561	10.8246	9.41461	10.148	11.6495	10.3815	19.3642	20.9872	18.3768
ENSDARG00000004823	asz1	ENSMUSG00000010796	Asz1	ortholog_one2one	36.25	36.6316	75	51.59	0	0.550856	0	0	0	0	0	0	0	0	0	0	0	0	0	0.02	0	0.00666667	0.126228	0	0	0	0	0	0	0	0	0	0	0	0	0	0	0	0	0	0	0	0	0	0
ENSDARG00000004830	flot2a	ENSMUSG00000061981	Flot2	ortholog_one2many	79.9065	79.9065	50	4.15	0	3.62643e-07	104.1	105.9	111.23	107.077	61.65	56.18	60.5	59.4433	16.89	19.09	19.98	18.6533	5.02	6.52	4.09	5.21	0	17.9893	20.0963	18.3975	17.3204	18.4509	12.8047	11.7617	12.3545	12.801	12.0519	11.652	12.2376	54.7768	58.4829	53.6565	54.4261	55.5673	56.7297	55.6066	42.2342	40.9937	40.7816
ENSDARG00000004836	dnajc5ab	ENSMUSG00000000826	Dnajc5	ortholog_one2many	77.3869	77.7778	0	0	0	3.73972e-06	10.73	9.7	9.88	10.1033	4.34	4.91	5.6	4.95	21.87	23.69	26.72	24.0933	1.99	1.81	1.61	1.80333	7.76707e-09	15.3576	16.2774	15.0511	17.0779	15.941	11.484	11.2564	11.9947	12.2255	11.5403	12.2161	11.7862	12.3888	12.8257	11.9715	11.5283	12.2565	12.7703	12.2902	10.3289	9.71832	9.79793
ENSDARG00000004840	rassf1	ENSMUSG00000010067	Rassf1	ortholog_one2one	44.2368	41.7647	50	73.41	0	2.17394e-05	5.38	5.15	5.39	5.30667	11.83	12.59	11.17	11.8633	9.57	7.48	7.13	8.06	1.41	2.33	1.55	1.76333	2.44683e-13	5.9817	5.60025	5.26201	5.83792	5.67047	5.8547	5.90001	5.51648	6.13198	5.52907	5.51326	5.74092	2.3067	2.15485	2.13613	2.14386	2.28271	2.34272	2.22783	3.51783	3.26197	3.6245
ENSDARG00000004851	hinfp	ENSMUSG00000032119	Hinfp	ortholog_one2one	57.9055	56.0636	75	40.26	1	0.0106325	9.03	7.89	7.49	8.13667	2.6	2.32	2.73	2.55	0.64	1.7	1.21	1.18333	0.72	0.9	0.59	0.736667	6.09192e-05	1.84513	1.28115	1.87168	1.7743	1.69307	1.85177	2.27505	1.89113	2.373	1.77384	1.94183	2.01777	1.69425	1.53225	1.3873	1.57807	1.63962	1.83391	1.6109	0	0	0
ENSDARG00000004861	esrrga	ENSMUSG00000026610	Esrrg	ortholog_one2one	83.4331	91.2664	75	37.64	1	8.03204e-08	1.79	2.05	2.01	1.95	0.84	0.93	0.86	0.876667	0.21	0.25	0	0.153333	0.01	0	0	0.00333333	0	0	0.014446	0	0	0.0036115	0.487203	0.419775	0.472174	0.231554	0.340564	0.25634	0.367935	0.859681	1.06626	0.888291	0.633909	1.03995	1.05117	0.92321	0.0320013	0.0636525	0.0167283
ENSDARG00000004864	zgc:171734	ENSMUSG00000074397	Foxr1	ortholog_one2many	16.5109	23.7668	25	7.33	0	0.000191632	0	0	0	0	0	0	0	0	0	0	0	0	0.02	0	0	0.00666667	0.395922	0	0	0	0	0	0	0	0	0	0	0	0	0	0	0	0	0	0	0	0	0	0
ENSDARG00000004866	fam63a	ENSMUSG00000038712	Mindy1	ortholog_one2one	49.2308	54.7009	0	64.54	0	0.0916959	12.49	11.83	11.83	12.05	14.83	16.81	16.58	16.0733	1.03	2.18	6.64	3.28333	3.55	4.6	3.73	3.96	9.50189e-09	14.9859	14.3867	15.3375	15.1681	14.9695	18.8274	19.9879	20.0885	20.1667	19.6896	19.1897	19.6583	13.2079	14.5633	13.7591	13.1335	14.0624	13.2522	13.6631	19.1035	19.1214	19.4416
ENSDARG00000004869	penka	ENSMUSG00000045573	Penk	ortholog_one2many	52.3207	46.2687	75	100	1	0.377113	0	0	0	0	0	0	0	0	0	0.62	0.11	0.243333	0.09	0.01	0	0.0333333	1.46505e-07	0	0.164652	0.18041	0	0.0862656	0	0	0	0	0	0	0	0.515709	0.337583	0.318382	0.253515	0.395105	0.327351	0.357941	0.364744	0.665041	1.01688
ENSDARG00000004870	psen1	ENSMUSG00000019969	Psen1	ortholog_one2one	70.8333	69.1649	25	12.7	0	0.00159654	23.24	21.41	19.81	21.4867	22.55	25.1	21.97	23.2067	5	8.6	15.89	9.83	4	3.84	4.58	4.14	5.06772e-10	38.1684	38.1877	36.6042	40.5565	38.3792	43.5687	44.437	42.7843	44.3772	42.159	41.5853	43.1519	38.9072	39.4135	40.4629	38.9101	39.253	40.4346	39.5635	46.6675	44.3502	43.1871
ENSDARG00000004871	mst1rb	ENSMUSG00000032584	Mst1r	ortholog_one2many	37.971	38.0261	50	3.63	0	0.711779	0	0	0	0	0.01	0.01	0	0.00666667	0.02	0	0	0.00666667	0.13	0	0	0.0433333	0.0123702	0	0.0179111	0	0	0.00447776	0.0517771	0.0173488	0.0566547	0.0382795	0.100536	0.218506	0.080517	0	0	0	0	0	0	0	0	0	0
ENSDARG00000004874	spata6l	ENSMUSG00000064202	4430402I18Rik	ortholog_one2one	23.0769	22.4784	25	5.73	0	6.29315e-07	80.21	79.8	74.9	78.3033	0.63	0.56	0.2	0.463333	0.18	0.27	0.31	0.253333	0.25	0.19	0.09	0.176667	2.3419e-07	0.349139	0.314379	0.398855	0.379912	0.360571	0.510205	0.432725	0.610606	0.388989	0.464378	0.385361	0.465377	0.587346	1.08558	0.863862	0.955357	0.992623	1.204	0.948128	0.403193	0.400988	0.440688
ENSDARG00000004880	acsm3	ENSMUSG00000030935	Acsm3	ortholog_one2one	62.4365	63.6207	0	35.16	0	0.0105497	0	0	0	0	1.5	1.53	1.64	1.55667	0.14	0.16	0.23	0.176667	0.32	0.23	0.27	0.273333	2.42628e-05	0.401629	0	0.31852	0	0.180037	0.175073	0	0.172409	0.213566	0.0815861	0.0805995	0.120539	0	0.130378	0	0.125884	0	0	0.0427104	0.160992	0.140097	0.315587
ENSDARG00000004889	aga	ENSMUSG00000031521	Aga	ortholog_one2one	61.4243	59.8266	50	37.31	0	0.00304868	3.52	3.99	4.63	4.04667	13.75	14.2	14.57	14.1733	7.39	10.85	15.4	11.2133	4.11	5.37	4.46	4.64667	7.36778e-12	11.4143	11.7462	11.2615	10.7728	11.2987	12.5473	12.0886	13.77	13.6255	13.5335	12.8556	13.0701	26.1002	26.618	26.7627	26.236	24.3387	27.4244	26.2467	11.2984	11.492	10.4252
ENSDARG00000004891	pex19	ENSMUSG00000003464	Pex19	ortholog_one2one	56.9444	54.8495	0	77.64	1	0.000100005	77.31	81.89	87.3	82.1667	57.73	49.1	58.71	55.18	7.66	7.69	13.53	9.62667	21.66	20.7	22.1	21.4867	1.62125e-07	18.0931	18.8999	19.189	18.4541	18.659	15.6296	14.7091	13.1859	13.2382	14.5408	14.9646	14.378	34.9731	34.4366	35.2097	35.8051	34.889	32.8365	34.6917	31.2707	30.9443	32.9105
ENSDARG00000004898	zp2l2	ENSMUSG00000024734	Zp1	ortholog_one2many	31.6583	20.2247	0	0	0	0.433359	0	0	0	0	0.14	0.09	0.03	0.0866667	0	0	0	0	0.04	0	0	0.0133333	0	0.0909753	0.271622	0.0992058	0.148491	0.152574	0.828825	0.61389	0.763709	0.919142	0.609857	0.80331	0.756456	1.1816	1.02099	1.47063	1.46376	1.30359	1.08004	1.25343	1.80512	1.39631	1.6251
ENSDARG00000004904	gys2	ENSMUSG00000030244	Gys2	ortholog_one2one	78.3167	77.983	0	91.67	1	5.86831e-05	0	0	0	0	0.09	0.17	0.06	0.106667	0.04	0	0	0.0133333	59.52	72.06	98.6	76.7267	6.84716e-08	0	0	0	0	0	0	0	0	0	0	0	0	0	0	0	0	0	0	0	0	0	0
ENSDARG00000004906	stip1	ENSMUSG00000024966	Stip1	ortholog_one2one	79.5203	79.3738	50	11.08	0	0.000669917	30.79	32.63	32.65	32.0233	48.87	49.17	45.57	47.87	9.42	12.84	18.17	13.4767	7.03	7.07	9.72	7.94	3.48211e-05	117.024	110.894	111.965	110.192	112.519	100.852	101.176	96.3843	102.316	100.816	98.4071	99.9919	68.2511	68.4543	67.274	67.9126	68.6305	68.4306	68.1588	75.0132	77.1943	75.8916
ENSDARG00000004925	immp2l	ENSMUSG00000056899	Immp2l	ortholog_one2one	63.0435	66.2857	25	59.76	0	0.0378815	15.99	17	17.55	16.8467	15.78	17.58	15.98	16.4467	4.41	3.39	8.9	5.56667	2.3	3.68	3.14	3.04	0.0494511	8.95207	8.07713	7.61648	8.45659	8.27557	6.17931	5.64246	6.14206	5.64952	5.99008	5.10329	5.78445	7.87063	8.73184	7.15609	7.57486	9.63234	6.89051	7.97605	4.39186	6.30911	5.95205
ENSDARG00000004931	slc8a3	ENSMUSG00000079055	Slc8a3	ortholog_one2one	80.2617	79.3103	25	91.48	1	0.0381978	0	0	0	0	0.18	0.18	0.22	0.193333	0	0	0.07	0.0233333	0	0	0	0	0	0.1014	0.0336387	0.110574	0.0551689	0.0751954	0.113449	0.0325827	0.195072	0.179731	0.0944085	0.0932669	0.118085	0.14048	0.137937	0.0585413	0.174802	0.121081	0.160507	0.132225	0.894211	1.0746	1.11017
ENSDARG00000004937	skp2	ENSMUSG00000054115	Skp2	ortholog_one2one	46.0976	44.5755	75	3.82	0	0.000175412	0.82	0.98	0.95	0.916667	1.62	1.64	1.47	1.57667	1.54	2.15	2.53	2.07333	0.12	0.26	0.2	0.193333	9.90855e-12	0.560691	0.478297	0.449204	0.460696	0.487222	0.515752	0.496374	0.51631	0.486769	0.690358	0.770419	0.57933	0.523138	0.665436	0.845591	0.723281	0.560205	0.516212	0.638977	0.895565	0.903211	0.84398
ENSDARG00000004939	mtdhb	ENSMUSG00000022255	Mtdh	ortholog_one2many	36.0958	33.8515	0	0	0	1.93437e-05	43.08	42.56	37.28	40.9733	10.42	11.85	11.6	11.29	2.55	4.49	4.71	3.91667	1.07	0.83	1.18	1.02667	4.84241e-14	5.49784	5.479	5.53219	5.72304	5.55802	7.55854	7.52604	7.34816	6.92442	7.40763	7.02205	7.29781	5.10103	5.31273	5.09226	5.08557	5.19499	5.25339	5.17333	7.10335	7.6362	6.91984
ENSDARG00000004948	bccip	ENSMUSG00000030983	Bccip	ortholog_one2one	55.1495	52.5316	50	38.21	0	6.3407e-05	109.29	110.76	104.31	108.12	67.64	75.35	65.79	69.5933	15.72	26.98	24.81	22.5033	35.66	33.69	37.78	35.71	6.8651e-08	46.5588	50.0328	48.4567	51.1919	49.06	32.0986	34.0131	31.5034	32.869	32.0112	34.1619	32.7762	44.5637	42.9903	45.693	43.3451	46.4614	45.8253	44.8131	54.7837	52.2058	50.294
ENSDARG00000004952	rsad2	ENSMUSG00000020641	Rsad2	ortholog_one2one	66.8524	66.2983	75	55.26	1	0.0330735	0	0	0	0	2.61	1.8	1.18	1.86333	8.44	5.37	2.17	5.32667	15.34	4.72	9.16	9.74	0.00146171	0.104102	0.020721	0.0908164	0.0453113	0.0652378	0.459234	0.401412	0.458801	0.575705	0.51176	0.459611	0.477754	1.38454	1.50818	1.41839	1.48354	1.56627	1.55721	1.48636	0.504922	0.388033	0.599868
ENSDARG00000004954	grna	ENSMUSG00000034708	Grn	ortholog_one2many	22.021	38.3721	0	10.04	0	0.00103665	2.55	1.53	1.46	1.84667	10.96	13.61	9.75	11.44	155.25	178.52	291.65	208.473	5.78	17.12	3.03	8.64333	1.68539e-10	10.0642	10.2485	9.98473	10.2739	10.1428	14.0544	13.8775	12.8471	12.7446	11.8819	11.7382	12.8573	25.4153	24.7172	26.2664	25.9945	25.5528	26.9139	25.81	18.757	18.9956	19.1317
ENSDARG00000004956	zmat2	ENSMUSG00000001383	Zmat2	ortholog_one2one	89.899	89.4472	0	95.35	1	1.77886e-05	31.17	30.81	28.81	30.2633	37.64	38.3	39.78	38.5733	27.27	33.18	37.08	32.51	12.06	11.49	11.6	11.7167	0.000176831	27.2289	27.4168	28.4298	29.7593	28.2087	21.2115	21.8222	21.3664	20.1686	19.6715	18.9489	20.5315	38.3314	40.2446	42.6885	42.8559	38.4253	38.2979	40.1406	31.0275	30.9891	32.6685
ENSDARG00000004964	cyp4t8	ENSMUSG00000028712	Cyp4a31	ortholog_one2many	47.9371	47.9371	50	40.67	0	3.61742e-05	107.17	96.59	96.11	99.9567	2.43	1.81	1.74	1.99333	0.22	0.36	0.49	0.356667	60.36	60.9	57.69	59.65	0.00362421	0.107745	0.107231	0.0391643	0.0390807	0.0733053	0.0688848	0.0692431	0.037687	0.114587	0	0	0.0484003	0	0.146569	0.0829393	0	0	0	0.0382513	0.0395903	0.118121	0
ENSDARG00000004979	elovl5	ENSMUSG00000032349	Elovl5	ortholog_one2one	72.8522	70.903	75	45.41	1	0.000710641	7.21	4.1	3.03	4.78	0.64	0.62	0.53	0.596667	1.5	1.8	2.43	1.91	33.33	19.47	24.32	25.7067	0.0107663	28.4763	28.4422	29.2949	27.0886	28.3255	41.7849	44.4686	41.9894	42.4472	42.5063	43.969	42.8609	63.7491	61.7078	60.5613	63.1597	59.8798	63.6037	62.1102	70.3672	68.3275	71.9749
ENSDARG00000004988	ppp3ca	ENSMUSG00000028161	Ppp3ca	ortholog_one2many	82.9746	81.382	0	50.39	0	7.24775e-05	4.47	4.92	4.36	4.58333	0.4	0.32	0.19	0.303333	1.43	1.27	0.85	1.18333	0.04	0.00476	0.03	0.02492	0	12.4246	11.9422	12.9069	11.5451	12.2047	14.8939	14.6404	14.307	14.1002	14.8313	15.0489	14.6369	7.33818	7.52228	8.17353	8.54865	7.63275	7.56921	7.79743	10.1098	9.248	9.6652
ENSDARG00000005002	brf1b	ENSMUSG00000011158	Brf1	ortholog_one2one	64.9351	66.568	50	23.02	0	0.00158221	4.63	4.49	4.2	4.44	1.83	1.74	1.39	1.65333	2.04	0.54	0.39	0.99	0.51	0.49	0.31	0.436667	1.56545e-06	18.2839	20.2473	21.757	20.714	20.2506	21.6118	19.5802	21.1079	21.3232	20.7567	18.4118	20.4653	13.5602	14.5161	13.9359	12.7806	13.6697	13.5519	13.6691	14.9989	14.7376	15.7941
ENSDARG00000005004	slc5a12	ENSMUSG00000041644	Slc5a12	ortholog_one2one	62.6603	62.7608	50	54.67	0	0.000573451	0	0.05	0	0.0166667	0.49	0.42	0.47	0.46	0	0	0	0	0.00936	0.02	0.02	0.0164533	0.268636	0	0	0	0	0	0	0	0	0	0	0	0	0	0	0	0	0	0	0	0	0	0
ENSDARG00000005015	tspy	ENSMUSG00000039485	Tspyl4	ortholog_one2many	19.2678	24.6305	25	4.67	0	0.00017959	0	0	0	0	0	0	0	0	0	0	0	0	0	0	0	0	3.05338e-10	39.3524	41.1065	40.8354	40.0152	40.3274	23.0131	22.9312	22.0364	23.742	22.9956	22.2817	22.8333	14.0722	13.8649	14.565	14.6838	16.5048	15.3338	14.8374	14.8268	14.4656	13.7609
ENSDARG00000005023	fkbp9	ENSMUSG00000029781	Fkbp9	ortholog_one2one	65.9574	65.2632	0	32.67	0	9.83792e-06	2.5	2.95	3.44	2.96333	75.73	84	78.49	79.4067	0	0	0.04	0.0133333	1	1.19	0.93	1.04	0	51.2822	52.9857	52.6305	53.9975	52.724	75.4901	73.5237	73.1573	73.0168	71.6953	73.3794	73.3771	180.055	186.007	175.003	174.653	180.33	181.159	179.534	115.997	118.135	114.065
ENSDARG00000005026	tshz1	ENSMUSG00000046982	Tshz1	ortholog_one2one	60.4917	63.5609	25	99.16	1	1.86968e-06	2.02	2.18	2.31	2.17	1.52	1.65	1.57	1.58	1.01	0.99	0.72	0.906667	0.46	0.45	0.5	0.47	1.65746e-05	1.0993	0.935495	0.938158	1.10952	1.02062	3.28491	2.91804	2.69159	3.2701	3.00821	2.74323	2.98601	2.6321	2.27562	2.04195	2.10564	2.09265	2.19404	2.22367	3.24901	3.63297	3.3784
ENSDARG00000005034	ispd	ENSMUSG00000043153	Ispd	ortholog_one2one	44.6429	44.7427	100	2.31	0	2.23264e-06	34.22	36.79	36.39	35.8	24.53	26.13	23.66	24.7733	2.72	0.77	1.75	1.74667	1.67	1.23	1.87	1.59	8.32656e-10	4.22081	3.73392	3.54333	3.17125	3.66733	2.24874	2.06669	1.79271	1.99503	2.50757	2.36633	2.16285	4.66409	5.77586	5.87925	5.46678	4.84002	4.29503	5.1535	1.47706	1.57915	1.54423
ENSDARG00000005049	rab20	ENSMUSG00000031504	Rab20	ortholog_one2one	61.5702	63.9485	75	93.01	1	0.00320133	3.83	3.67	3.82	3.77333	19.07	18.62	16.56	18.0833	14.55	23.9	32.88	23.7767	22.59	16.27	14.37	17.7433	7.94668e-06	2.5894	3.92997	2.32952	3.16984	3.00468	4.65603	4.86746	6.18151	6.19608	6.14768	6.57349	5.77038	14.7978	12.3505	12.1837	12.9451	12.9089	12.6806	12.9778	10.3471	8.51627	9.62395
ENSDARG00000005057	dimt1l	ENSMUSG00000021692	Dimt1	ortholog_one2one	82.6797	80.8307	0	88.4	1	0.0140236	1.44	1.12	1.54	1.36667	1.95	1.56	2.56	2.02333	3.95	2.51	1.41	2.62333	1.19	1.48	2.19	1.62	0	20.1112	18.8523	18.9191	17.0679	18.7376	10.4582	8.2599	9.62287	9.07492	10.0875	10.7471	9.70842	4.92982	4.8406	4.25184	5.61547	4.52386	4.91805	4.84661	7.06447	8.26798	9.54841
ENSDARG00000005058	ncapd2	ENSMUSG00000038252	Ncapd2	ortholog_one2one	48.6232	48.204	0	69.11	0	0.000323138	1.53	1.12	1.19	1.28	0.88	0.66	1.09	0.876667	0.48	0.57	1.16	0.736667	0.11	0.43	0.15	0.23	0	3.4365	3.52026	3.26133	3.1605	3.34465	2.22004	2.41177	1.886	2.53841	2.20086	2.04728	2.21739	2.68922	2.94862	2.60658	2.69354	2.7471	2.68	2.72751	6.29245	6.38415	5.75006
ENSDARG00000005078	eif4e3	ENSMUSG00000093661	Eif4e3	ortholog_one2one	68.3036	73.913	0	2.45	0	2.63008e-05	60.13	59.28	60.12	59.8433	25.88	25.38	24.42	25.2267	16.01	18.26	11.5	15.2567	26.35	22.13	22.11	23.53	1.86112e-12	1.25403	1.35502	1.56284	1.48153	1.41335	3.43602	3.38482	3.75971	3.50561	4.0431	4.70605	3.80589	6.21717	6.57986	6.20561	5.9707	7.35875	6.63562	6.49462	3.94958	3.33878	4.04661
ENSDARG00000005092	cep89	ENSMUSG00000023072	Cep89	ortholog_one2one	38.9592	35.019	75	33.58	0	1.40995e-06	7.79	8.34	9.12	8.41667	6.31	7.28	7.54	7.04333	0.4	0.09	0.19	0.226667	0.08	0.06	0.08	0.0733333	2.52974e-14	4.03879	3.82558	3.99853	3.77796	3.91021	5.23218	5.24232	4.90721	4.78504	5.38317	4.77063	5.05343	5.4849	5.8013	4.97022	5.63914	6.11293	6.14068	5.69153	4.13965	4.62192	4.4708
ENSDARG00000005095	glcea	ENSMUSG00000032252	Glce	ortholog_one2many	70.7692	66.9903	0	89.11	1	0.490442	0	0	0	0	5.19	4.67	5.52	5.12667	0	0.69	0.73	0.473333	0.04	1.02	0.02	0.36	7.91599e-10	5.87279	6.23877	6.08749	5.71548	5.97863	4.27777	4.60534	4.58381	4.99655	4.49715	4.07861	4.50654	7.51452	7.76898	7.34488	7.76554	7.15445	7.95912	7.58458	2.44402	2.8647	2.67684
ENSDARG00000005104	limk2	ENSMUSG00000020451	Limk2	ortholog_one2one	65.2842	66.6144	25	42.52	0	9.88125e-05	2.59	3.16	2.84	2.86333	12	11.38	11.38	11.5867	0.02	0.03	0.51	0.186667	20.68	26.25	16.81	21.2467	1.20054e-11	38.4881	38.4955	35.2678	35.3694	36.9052	47.9758	46.8296	46.4644	47.7985	47.4746	46.2482	47.1319	32.8372	33.4187	33.5736	32.1261	33.2204	32.6951	32.9785	36.7751	36.7846	40.1502
ENSDARG00000005108	oclna	ENSMUSG00000021638	Ocln	ortholog_one2many	43.949	39.7313	25	44.46	0	0.040241	0.34	0.23	0.13	0.233333	14.05	16.35	13.07	14.49	0.99	0.32	0	0.436667	10.65	4.54	3.31	6.16667	3.0366e-07	19.8492	19.0534	17.7116	18.2312	18.7113	39.7898	38.8652	38.9246	37.2254	38.5111	38.3987	38.6191	11.931	11.9111	12.5192	12.6569	11.8253	12.4411	12.2141	14.4928	15.911	16.0865
ENSDARG00000005112	cdh17	ENSMUSG00000028217	Cdh17	ortholog_one2one	34.2166	35.9129	75	0	0	0.0236478	0	0	0	0	0.05	0.18	0	0.0766667	0	0.05	0	0.0166667	8.28	5.64	1.61	5.17667	1.65394e-13	0	0	0	0	0	0	0	0	0	0	0	0	0.0837101	0.184939	0.093024	0.162031	0.168351	0.167378	0.143239	0	0	0
ENSDARG00000005122	atp2a2b	ENSMUSG00000029467	Atp2a2	ortholog_one2many	87.6329	86.8774	0	53.85	0	0.00207111	11.78	12.67	13.27	12.5733	4.82	4.86	4.37	4.68333	9.98	15.47	11.95	12.4667	18.66	11.62	16.1	15.46	0.0376633	14.3294	14.8804	14.834	14.6734	14.6793	15.9445	16.456	15.8294	16.2637	15.811	17.0591	16.2273	19.4004	19.4725	19.2832	18.7332	19.7648	19.9496	19.4339	18.736	17.9837	17.7949
ENSDARG00000005126	large	ENSMUSG00000004383	Large1	ortholog_one2one	83.8838	83.9947	0	100	1	0.411781	0.39	0.37	0.47	0.41	0.23	0.19	0.25	0.223333	0	0	0	0	0.15	0.08	0.05	0.0933333	1.92544e-09	0.445811	0.364047	0.386422	0.435351	0.407908	0.449455	0.319561	0.551771	0.340393	0.549172	0.529914	0.456711	0.46322	0.419849	0.356372	0.210196	0.450439	0.284986	0.364177	0.390624	0.388488	0.513779
ENSDARG00000005128	rnaseh2b	ENSMUSG00000021932	Rnaseh2b	ortholog_one2one	48.6928	48.3766	50	37.45	0	1.44502e-05	10.32	10.72	12.73	11.2567	8.83	9.46	7.42	8.57	7.63	7.5	10.13	8.42	1.48	1.92	1.31	1.57	6.95867e-07	1.5733	1.7238	1.74711	1.88474	1.73224	0.595208	0.723531	0.666426	0.905675	0.774068	0.700982	0.727648	1.18481	1.00138	1.58329	1.11142	1.1203	1.1995	1.20012	1.24105	1.18679	0.964801
ENSDARG00000005134	psmd11b	ENSMUSG00000017428	Psmd11	ortholog_one2many	93.1116	92.891	0	18.64	0	0.00817358	48.27	49.06	45.79	47.7067	26.41	27.32	30.02	27.9167	8.35	19.68	23.73	17.2533	13.91	10.76	17.69	14.12	4.71692e-07	6.55045	6.75801	6.52728	8.40284	7.05965	7.75753	7.94758	7.37729	7.83717	7.20813	7.74425	7.64533	9.50527	9.6357	10.0901	9.34529	10.283	10.1397	9.83318	12.3873	10.4624	10.1848
ENSDARG00000005139	hhatlb	ENSMUSG00000032523	Hhatl	ortholog_one2many	52.3277	55.8648	50	0	0	0.00350783	0	0	0	0	0.26	0.16	0.08	0.166667	0.21	0.1	0.08	0.13	0.04	0.0058	0.00665	0.0174833	9.59772e-15	50.7847	53.7802	48.129	51.1562	50.9625	158.497	165.549	161.207	163.081	153.834	147.394	158.26	225.917	229.237	226.334	224.625	212.892	217.763	222.795	197.988	199.387	189.167
ENSDARG00000005141	camkvb	ENSMUSG00000032936	Camkv	ortholog_one2many	70.8716	60.3516	50	0.61	0	0.678236	0	0	0	0	0.34	0.29	0.33	0.32	0.02	0.41	0.01	0.146667	0.01	0.00584	0.0067	0.00751333	1.87247e-07	0	0	0	0	0	0	0	0	0	0	0	0	0.0497634	0.0732941	0.0553002	0.0550416	0.171566	0.142145	0.091185	0	0	0
ENSDARG00000005150	tbx20	ENSMUSG00000031965	Tbx20	ortholog_one2one	86.9955	87.191	0	100	1	1	0	0	0	0	0	0	0	0	0	0	0	0	0	0.00804	0.03	0.01268	0.000264299	0	0	0	0	0	0	0	0	0	0	0	0	0	0	0	0	0	0	0	0	0	0
ENSDARG00000005154	aspa	ENSMUSG00000020774	Aspa	ortholog_one2one	57.7778	58.3333	50	79.54	1	0.0099659	4.63	3.83	4.06	4.17333	0.69	0.79	0.79	0.756667	4.69	2.28	2.38	3.11667	0.26	0.41	0.66	0.443333	6.32085e-06	0	0	0	0	0	0.217709	0.24802	0.158812	0.128764	0.270547	0.133638	0.192915	0.0629021	0.16985	0.122326	0.0869674	0.0542158	0.125772	0.103672	0.266932	0.265472	0.36628
ENSDARG00000005159	cyth3b	ENSMUSG00000018001	Cyth3	ortholog_one2many	92.132	90.9774	0	5.82	0	1.40664e-06	6.81	7.26	9.3	7.79	0.87	1.36	0.79	1.00667	1.65	1.14	1.15	1.31333	0.09	0.04	0.05	0.06	2.50262e-08	2.50201	2.60499	2.37158	2.51312	2.49793	2.97159	3.07981	2.8678	3.33634	2.79539	2.71911	2.96167	5.09944	4.24135	4.73346	4.77768	4.11373	4.38697	4.55877	5.49487	4.93733	6.27708
ENSDARG00000005162	tpm3	ENSMUSG00000058126	Tpm3-rs7	ortholog_one2many	63.3803	72.5806	0	0	0	7.99379e-06	6.78	7.68	6.98	7.14667	136.13	145.03	137.3	139.487	44.25	49.69	56.09	50.01	5.88	5.72	4.71	5.43667	0.00563507	0.128363	0.170334	0.233294	0.139677	0.167917	0.0820664	0.12374	0.0448987	0	0	0.0472269	0.0496553	0.800255	0.392886	0.741078	0.0983483	0.766384	1.16833	0.661213	0.424496	0.328358	0.0986222
ENSDARG00000005163	efr3a	ENSMUSG00000015002	Efr3a	ortholog_one2one	74.9059	72.8938	75	78.29	1	0.000903759	51.02	52.9	52.84	52.2533	3.84	3.5	3.61	3.65	6.27	7.41	5.76	6.48	5.06	5.4	3.67	4.71	2.85359e-12	80.3695	81.7646	79.6225	79.8857	80.4105	72.9444	73.5353	75.1526	73.4277	77.7024	76.6103	74.8954	12.8909	13.1549	12.5146	13.1003	14.0867	14.121	13.3114	20.1333	19.9074	20.3466
ENSDARG00000005172	dynll2b	ENSMUSG00000020483	Dynll2	ortholog_one2many	98.8764	98.8764	25	0	0	1.96191e-07	442.38	438.08	436.44	438.967	88.28	84.44	88.24	86.9867	13.96	10.67	10.22	11.6167	10.52	10.59	12.73	11.28	0.00796474	43.7051	42.4147	43.493	40.784	42.5992	21.983	20.8591	20.9435	21.2261	19.4289	18.7214	20.527	32.4077	32.5268	36.2416	37.2077	30.6755	34.2518	33.8852	26.2126	25.5276	24.0645
ENSDARG00000005176	zgc:101040	ENSMUSG00000051147	Nat2	ortholog_many2many	42.7586	42.7586	25	0	0	0.103502	0	0	0	0	0.82	0.93	0.76	0.836667	0	0	0	0	0.15	0.27	0.04	0.153333	0.00193329	4.29953	3.86298	5.40481	4.48356	4.51272	3.14969	3.91441	3.07043	2.92134	2.93559	3.42738	3.23647	3.59876	2.80253	3.30966	3.22555	2.70962	3.47378	3.18665	5.46359	4.77904	4.81739
ENSDARG00000005179	c17h14orf159	ENSMUSG00000021185	9030617O03Rik	ortholog_one2one	51.9417	52.0259	50	2.14	0	0.00131578	4.89	3.57	4.33	4.26333	6.5	5.4	5.76	5.88667	1.78	0.86	1.99	1.54333	1.99	3.33	3.78	3.03333	0	0.426777	0.566319	0.487549	0.530737	0.502846	0.974469	1.07749	0.810364	0.886139	0.930935	0.874816	0.925703	3.82206	3.52481	3.07402	3.36327	2.91205	2.89521	3.26524	0.896094	1.09171	1.03053
ENSDARG00000005186	sp4	ENSMUSG00000025323	Sp4	ortholog_one2one	66.6667	60.8696	50	87.67	1	2.44288e-08	11.1	11.1	9.63	10.61	3.93	4.31	4.57	4.27	0.98	1.38	1.61	1.32333	0.63	0.74	0.57	0.646667	1.77959e-15	1.29622	1.29003	1.31131	1.44446	1.33551	1.66242	1.47536	1.47489	1.74392	1.57036	1.89611	1.63718	1.03853	1.03567	1.06392	1.13073	1.11889	0.90848	1.04937	1.92811	1.83196	2.15977
ENSDARG00000005191	ahcy	ENSMUSG00000048087	Gm4737	ortholog_one2many	85.9122	86.1111	25	49.55	0	4.0105e-05	12.2	12.6	11.25	12.0167	10.73	11.64	12.11	11.4933	28.5	25.43	24.7	26.21	1113.26	729.76	1046.86	963.293	0.102659	3.37754	14.523	4.10808	12.4393	8.61198	2.90683	9.39199	2.58997	2.57887	2.70924	2.15074	3.72127	14.9376	4.68291	12.2497	3.58307	14.9948	14.7538	10.867	8.63964	3.03819	2.49517
ENSDARG00000005210	coro2a	ENSMUSG00000028337	Coro2a	ortholog_one2many	63.227	62.0626	0	71.75	0	2.47009e-05	4.1	4.35	4.91	4.45333	1.48	1.02	1.02	1.17333	0	0.31	0	0.103333	0.48	0.21	0.08	0.256667	0	0.334829	0.305461	0.136921	0.227714	0.251231	0.240825	0.295872	0.263512	0.430275	0.21822	0.323371	0.295346	4.78369	5.06718	4.02722	4.28096	4.59788	5.08473	4.64028	0.169167	0.137653	0.225095
ENSDARG00000005218	wrnip1	ENSMUSG00000021400	Wrnip1	ortholog_one2one	62.4542	51.6667	50	26.63	0	0.00357831	16.12	17.14	15.29	16.1833	2.69	2.86	2.4	2.65	0.23	0.34	3.06	1.21	1.13	1.17	1.47	1.25667	5.69843e-06	14.374	14.4075	13.883	13.5182	14.0457	14.3097	16.2646	14.6881	14.7407	16.48	15.6008	15.3473	25.7455	26.362	24.7374	25.959	25.2961	25.0279	25.5213	24.899	25.8509	25.0058
ENSDARG00000005220	pdcd6	ENSMUSG00000021576	Pdcd6	ortholog_one2one	82.7027	80.1047	0	41.79	0	4.49496e-09	3.71	4.43	4.44	4.19333	57.37	51.24	56.02	54.8767	43.43	47.15	40.9	43.8267	4.11	5.4	3.24	4.25	1.01752e-13	173.895	173.183	178.151	178.671	175.975	51.2032	51.6975	56.9574	55.7766	56.8126	52.993	54.2401	85.8273	82.3436	84.0435	85.4852	83.8774	85.0771	84.4423	98.0284	103.521	100.238
ENSDARG00000005221	desmb	ENSMUSG00000026208	Des	ortholog_one2many	69.4672	72.2814	50	32.98	0	0.856411	0	0	0	0	0	0	0	0	0.08	0.22	0	0.1	0.59	0.04	0.02	0.216667	0	0.216036	0.238894	0.183229	0.261198	0.224839	0.0920788	0.161976	0.125941	0.229753	0.160912	0.105977	0.146106	0.473885	0.759188	0.388029	0.689669	0.286629	0.256474	0.475646	1.64054	1.71051	1.68748
ENSDARG00000005230	ssr2	ENSMUSG00000041355	Ssr2	ortholog_one2one	83.3333	84.6995	25	13.19	0	6.1693e-05	16.3	16.46	17.97	16.91	82.73	87.01	80.39	83.3767	47.48	67.58	71.4	62.1533	122.61	101.86	98.05	107.507	7.47413e-10	71.0639	66.635	70.7981	69.0689	69.3915	95.4562	89.7548	92.0711	97.9406	93.1156	94.8177	93.8593	100.26	103.082	103.824	107.672	104.483	98.5416	102.977	85.1036	90.044	84.9624
ENSDARG00000005232	ccdc85ca	ENSMUSG00000084883	Ccdc85c	ortholog_one2many	63.9386	59.5238	25	15.61	0	6.9207e-08	18.92	18.24	18.57	18.5767	1.41	1.49	1.98	1.62667	0	0.67	0	0.223333	0.29	0.04	0.00828	0.11276	0.000898057	1.74747	1.85506	2.09612	1.64796	1.83665	2.62544	2.35834	2.13929	1.79648	1.82221	1.80018	2.09032	0.484188	0.415997	0.672575	0.334715	0.347771	0.622368	0.479602	2.63259	1.78803	1.74536
ENSDARG00000005236	srcap	ENSMUSG00000107023	Gm42715	ortholog_one2many	32.6525	41.3247	50	37.6	0	3.70964e-09	0.94	0.98	1.06	0.993333	0.86	0.91	0.88	0.883333	1.95	1.45	1.13	1.51	1.8	1.51	1.64	1.65	0.142281	0.183813	0.527699	0.246699	0.653896	0.403027	0.345772	0.647436	0.318997	0.323302	0.236962	0.335538	0.368001	0.271795	0.108193	0.13061	0.194999	0.278582	0.226613	0.201799	1.02091	0.217016	0.0733283
ENSDARG00000005246	asb3	ENSMUSG00000020305	Asb3	ortholog_one2one	45.4721	44.9524	25	33.38	0	0.00525002	3.34	4.2	4.1	3.88	1.25	1.23	0.81	1.09667	0.81	0.84	0.42	0.69	0.7	0.72	0.95	0.79	6.4847e-06	6.26743	5.773	6.83445	7.14634	6.50531	4.49184	4.53127	4.84503	5.61949	5.43799	4.94907	4.97911	2.71918	2.82302	2.5598	2.95012	3.54289	3.68071	3.04595	4.63035	4.78776	4.70644
ENSDARG00000005251	rpe	ENSMUSG00000026005	Rpe	ortholog_one2one	80.7018	78.2979	0	61.28	0	2.24562e-05	29.87	31.15	29.29	30.1033	37.1	40.44	37.97	38.5033	12.18	17.7	15.76	15.2133	4.71	7.65	7.01	6.45667	5.01144e-05	29.7282	28.2035	28.6615	29.5767	29.0425	27.843	27.5972	27.7018	28.4758	30.6268	31.4386	28.9472	16.9033	15.7705	16.4444	17.3322	18.0774	18.076	17.1006	22.0809	23.2295	25.0532
ENSDARG00000005254	kdelr2a	ENSMUSG00000079111	Kdelr2	ortholog_one2many	91.5094	91.5094	0	3.36	0	0.00102174	20.73	22.53	23.41	22.2233	33.72	29.26	33.3	32.0933	31.25	52.21	56.15	46.5367	31.11	20.31	25.16	25.5267	0.573559	8.62188	9.56136	9.02583	8.04157	8.81266	8.50458	8.07388	8.89216	8.06902	8.36683	7.88501	8.29858	5.27275	4.87573	5.46121	6.34161	6.236	5.14712	5.55574	6.02835	5.34723	5.4508
ENSDARG00000005271	zc3h12a	ENSMUSG00000042677	Zc3h12a	ortholog_one2many	59.9455	36.9128	50	27.88	0	0.0419758	0	0	0	0	0	0	0	0	0	0	0	0	0	0	0	0	0.0010158	0.0625336	0.0311175	0.0340955	0.0680455	0.0489481	0.119939	0.120563	0.0328094	0.0997564	0.139732	0.0345107	0.0912184	0.129951	0.0956994	0.072205	0.107801	0.0746706	0.111358	0.0986142	0.0344663	0.0342778	0.0720674
ENSDARG00000005274	rad52	ENSMUSG00000030166	Rad52	ortholog_one2one	45.8525	47.381	50	56.64	0	0.00150859	0	0	0	0	0.19	0.09	0.17	0.15	0.15	0.16	0.07	0.126667	0.06	0.04	0.00805	0.0360167	1.66212e-09	4.33046	4.65563	3.84775	4.27585	4.27742	7.10092	7.11209	6.67591	6.45328	6.63018	6.25496	6.70456	4.41624	4.22722	4.0125	3.80941	4.40488	4.12553	4.16596	2.3868	2.22722	2.21808
ENSDARG00000005284	fbxl15	ENSMUSG00000025226	Fbxl15	ortholog_one2one	56.129	58	0	16.24	0	0.00045081	17.13	15.69	16.84	16.5533	10.36	9.75	9.63	9.91333	1.94	1.35	0.76	1.35	0.73	0.66	0.62	0.67	0.000292637	6.35055	7.31815	6.56061	6.61934	6.71216	4.80801	5.79962	5.82211	6.25614	6.27366	5.01726	5.6628	3.75075	3.27366	3.08746	2.45842	3.51218	3.17443	3.20948	3.68442	3.5177	4.31421
ENSDARG00000005314	CALHM1 (1 of many)	ENSMUSG00000079258	Calhm1	ortholog_one2many	59.5395	52.0115	0	0	0	0.550856	0	0	0	0	0	0	0	0	0	0	0	0	0	0	0	0	1	0	0	0	0	0	0	0	0	0	0	0	0	0	0	0	0	0	0	0	0	0	0
ENSDARG00000005315	celf1	ENSMUSG00000005506	Celf1	ortholog_one2one	84.6307	82.6511	50	47.95	0	0.00232608	20.25	21.92	20.68	20.95	20.06	22.21	22.01	21.4267	3.94	4.51	1.94	3.46333	9.32	7.98	8.05	8.45	0.00202296	6.80687	6.82745	6.50358	6.3736	6.62787	9.12657	9.40031	8.50854	8.60066	8.82088	9.43255	8.98159	7.00616	6.96644	6.22116	6.74383	7.05785	6.63705	6.77208	7.15059	7.83666	7.05771
ENSDARG00000005318	stam2	ENSMUSG00000055371	Stam2	ortholog_one2one	59.1356	57.5526	25	18.62	0	0.00131578	28.64	29.89	28.64	29.0567	27.29	25.43	25.73	26.15	7.03	10.86	15.19	11.0267	7.12	7.17	7.04	7.11	1.21318e-08	9.69064	10.0773	9.74945	10.251	9.9421	7.06346	5.61075	7.28812	7.19503	7.22355	6.75539	6.85605	9.80409	9.56543	8.72979	9.58545	9.43988	9.1894	9.38567	7.73887	8.17347	8.05622
ENSDARG00000005320	nipsnap1	ENSMUSG00000034285	Nipsnap1	ortholog_one2one	67.3835	66.1972	0	0.52	0	6.39083e-05	0	0	0	0	0.02	0	0.14	0.0533333	0	0	0	0	19.33	18.76	12.37	16.82	0.0156532	22.043	23.0549	23.926	24.4301	23.3635	11.6461	12.9855	13.6356	14.1814	13.264	13.0285	13.1235	19.5106	20.3028	18.7356	20.7591	20.1471	19.5056	19.8268	13.2368	13.4254	12.7802
ENSDARG00000005327	ftr66	ENSMUSG00000020773	Trim47	ortholog_one2many	25.603	21.4953	0	0	0	0.754452	0	0	0	0	0	0	0	0	0.63	0	0	0.21	0.08	0.12	0.04	0.08	2.81454e-13	0	0	0	0	0	0.189578	0.0635214	0.0691457	0.0700787	0.0736214	0.145462	0.101901	0.992784	0.672287	0.836944	0.90876	1.18026	1.13432	0.954226	2.97814	3.43142	3.22749
ENSDARG00000005332	lipib	ENSMUSG00000044626	Liph	ortholog_many2many	45.815	46.1197	0	9.88	0	0.00140155	5.69	5.44	5.95	5.69333	0	0	0	0	0	0.05	0	0.0166667	0.01	0	0	0.00333333	1.77959e-15	59.6068	59.8186	57.0202	58.6047	58.7626	38.116	37.902	39.9367	38.328	39.4693	39.228	38.83	18.9086	19.1724	18.9551	20.4227	19.262	19.2352	19.326	88.7781	86.8601	86.7098
ENSDARG00000005335	slc22a4	ENSMUSG00000063652	Slc22a21	ortholog_many2many	45.9016	44.6809	50	53.48	0	0.412805	0	0	0	0	0.27	0.36	0.28	0.303333	0	0	0	0	1.45	0.13	0.19	0.59	0.590411	0.444993	0.098415	0.781793	0.0807025	0.351476	0.900907	0.16682	0.882011	0.972787	0.718137	0.982319	0.770497	0.488057	1.43767	0.171271	1.07965	0.53136	0.498938	0.701157	0.218013	0.731769	0.940198
ENSDARG00000005343	ccdc85al	ENSMUSG00000032878	Ccdc85a	ortholog_one2many	51.2255	38.3486	0	0	0	1.92063e-05	1.95	2.05	2.46	2.15333	0.72	0.41	0.56	0.563333	0	0.17	0	0.0566667	0.09	0.1	0.05	0.08	0	0.633401	0.707565	0.634321	0.75956	0.683712	0.272723	0.174454	0.311979	0.261199	0.231077	0.228282	0.246619	0.684998	0.97593	0.940322	1.26275	0.956996	1.07423	0.982539	3.0351	3.01851	2.87518
ENSDARG00000005350	dip2ba	ENSMUSG00000023026	Dip2b	ortholog_one2many	79.7468	80.0508	0	14.06	0	0.0570137	2.28	2.93	2.62	2.61	0.93	0.84	0.83	0.866667	1.75	4.82	8.66	5.07667	5.44	4.62	6.1	5.38667	2.33424e-08	0.96214	1.34244	1.01833	1.18038	1.12582	1.35689	1.27302	1.24716	0.983105	1.18035	1.02031	1.17681	1.72499	2.0306	1.78622	2.20065	1.81343	2.03811	1.93233	1.67408	1.60287	1.57627
ENSDARG00000005355	larp6	ENSMUSG00000034839	Larp6	ortholog_one2one	55.0515	54.2683	0	84.43	1	0.111181	9.52	11.11	9.76	10.13	8.6	9.38	7.54	8.50667	3.49	3.22	12.26	6.32333	1.19	0.83	0.41	0.81	8.77133e-14	0.184654	0.110263	0.120816	0.0401859	0.11398	0.318747	0.427207	0.852561	0.824789	0.783962	0.489147	0.616069	1.03607	0.979638	0.596993	0.763973	0.88197	0.789183	0.841304	1.6691	1.9029	1.27683
ENSDARG00000005356	tyro3	ENSMUSG00000027298	Tyro3	ortholog_one2one	46.3134	45.6818	50	0	0	0.00405299	0	0.02	0	0.00666667	0.16	0.04	0.12	0.106667	0.03	0.03	0.29	0.116667	0.31	0.32	0.23	0.286667	0	7.37113	7.71213	7.277	6.99253	7.3382	2.88611	2.85908	2.6698	2.53575	2.84261	2.58358	2.72949	2.68895	2.23979	2.65238	2.20555	2.46519	2.26107	2.41882	7.90104	7.79408	8.79651
ENSDARG00000005359	sucla2	ENSMUSG00000022110	Sucla2	ortholog_one2one	77.897	78.4017	50	96.6	1	7.06179e-05	103.2	104.72	97	101.64	39.24	39.89	39.37	39.5	11.65	28.73	34.32	24.9	35.36	35.67	43.04	38.0233	5.50507e-06	55.0201	57.0961	55.3409	56.1571	55.9035	40.196	39.8823	40.3787	39.8902	42.7903	41.2753	40.7355	55.3843	56.2031	55.4415	55.8574	57.3617	56.7617	56.1683	63.3403	65.0995	63.5907
ENSDARG00000005364	grin3ba	ENSMUSG00000035745	Grin3b	ortholog_one2many	51.5723	49.0528	0	37.65	0	0.550856	0	0	0	0	0.13	0.12	0.13	0.126667	0	0	0	0	0.05	0.00418	0.02	0.0247267	7.04966e-08	0.054679	0	0.119252	0.0297493	0.05092	0.314621	0.237193	0.286883	0.290754	0.366543	0.241407	0.289567	0.113628	0.0836789	0.0315678	0.0314201	0.0652915	0	0.0542644	0.0904114	0.0899169	0.0315076
ENSDARG00000005368	mcamb	ENSMUSG00000032135	Mcam	ortholog_one2many	31.7536	31.0185	50	0	0	5.83167e-06	1.66	0.78	0.67	1.03667	4.29	4.25	4.36	4.3	189.09	217.41	147.46	184.653	1.38	1.08	0.82	1.09333	0	0.349684	0.562177	0.49865	0.439046	0.462389	1.44457	1.37429	1.55242	1.85944	1.41249	1.30634	1.49159	1.20182	0.878187	1.2113	0.803755	0.899346	0.766411	0.960135	0.148257	0.176935	0.0619995
ENSDARG00000005371	gprc6a	ENSMUSG00000019905	Gprc6a	ortholog_one2one	42.7912	39.9784	0	20.12	0	0.550856	0	0	0	0	0.22	0.21	0.32	0.25	0	0	0	0	0.06	0	0	0.02	1	0	0	0	0	0	0	0	0	0	0	0	0	0	0	0	0	0	0	0	0	0	0
ENSDARG00000005372	camk4	ENSMUSG00000038128	Camk4	ortholog_one2one	79.6703	61.8337	25	57.21	0	0.102266	2.84	1.78	1.67	2.09667	0.36	0.14	0.34	0.28	0.92	2.86	6.54	3.44	0.19	0.24	0.02	0.15	2.21081e-13	0.0292307	0.0290911	0.0318752	0.0318072	0.0305011	0.0420481	0.0493113	0.0613457	0.0310867	0.0326583	0.0403292	0.0427966	0.0379652	0.0372781	0.0168757	0.0335936	0.034904	0.0347022	0.0325531	0.241664	0.2804	0.32845
ENSDARG00000005374	tubgcp4	ENSMUSG00000027263	Tubgcp4	ortholog_one2one	88.1737	88.3058	50	53.52	0	7.24215e-06	11.74	11.05	10.3	11.03	6.08	6.18	4.99	5.75	2.8	2.43	2.74	2.65667	1.15	1.37	1.14	1.22	1.7417e-09	6.80528	5.52292	5.91102	5.06912	5.82708	4.70424	4.01475	4.44907	4.29221	4.809	4.38358	4.44214	4.51698	4.78567	5.00716	5.52653	5.08843	5.37758	5.05039	3.34853	3.38906	3.48844
ENSDARG00000005382	prdm9	ENSMUSG00000051977	Prdm9	ortholog_one2one	21.4537	21.6057	0	0	0	0.00439613	1.74	2.58	2.21	2.17667	0.83	1.07	0.68	0.86	4.77	2.21	1	2.66	1.44	1.32	1.63	1.46333	0.00160176	0.376508	0.395527	0.775523	0.54626	0.523455	0.200594	0.141146	0.153644	0.200208	0.257068	0.230872	0.197255	0.195605	0.341449	0.652107	0.504823	0.249769	0.223492	0.361208	0.737842	0.596218	1.08478
ENSDARG00000005392	slc5a5	ENSMUSG00000000792	Slc5a5	ortholog_one2one	57.1664	56.1489	0	83.76	1	0.152932	0	0.01	0	0.00333333	89.91	99.81	95.05	94.9233	0	0.39	0.47	0.286667	0.02	0.04	0.02	0.0266667	0.00010643	0	0	0	0	0	0.236109	0.267004	0.452116	0.621865	0.515764	0.407622	0.416747	0.159887	0.156993	0.213212	0.212215	0.0734975	0.109609	0.154235	0.0339249	0.0337393	0
ENSDARG00000005394	dnmt3aa	ENSMUSG00000020661	Dnmt3a	ortholog_one2many	64.6714	60.6828	0	1.49	0	0.00997585	2.25	1.69	1.16	1.7	0.8	1.64	1.49	1.31	0.2	0.19	0.28	0.223333	0.47	0.47	0.19	0.376667	2.72797e-05	0.969226	1.17476	0.814826	0.94271	0.975381	1.60453	1.5659	1.28977	1.50872	1.44585	1.42239	1.47286	1.58094	1.56337	1.42548	1.45615	1.45476	1.5042	1.49748	1.89209	1.84613	1.85333
ENSDARG00000005397	trim3b	ENSMUSG00000036989	Trim3	ortholog_one2many	75.3989	76.2097	25	0	0	0.00014533	166.06	168.08	176.24	170.127	8	8.3	9.06	8.45333	0.34	1.24	0.52	0.7	0.62	0.72	0.38	0.573333	0	11.3009	10.7954	11.0759	12.1896	11.3404	9.17307	8.89758	8.71271	9.061	7.62406	8.29376	8.62703	30.6771	31.2487	28.4428	26.4285	28.9431	29.642	29.2304	19.9577	20.4756	19.1379
ENSDARG00000005414	grapa	ENSMUSG00000004837	Grap	ortholog_one2many	57.9439	57.1429	100	22.86	1	1.05404e-05	0	0.01	0	0.00333333	3.01	3.16	2.88	3.01667	134.6	96.72	102.22	111.18	1.28	1.23	0.79	1.1	7.8973e-09	0.150771	0.150051	0.164412	0.109374	0.143652	0	0.048447	0.0527366	0.106896	0	0.0554712	0.0439252	0.0522196	0	0	0	0	0	0.00870327	1.7728	1.7631	1.15838
ENSDARG00000005416	map3k5	ENSMUSG00000071369	Map3k5	ortholog_one2one	71.1877	70.3623	0	40.46	0	1.04472e-06	11.32	11.78	11.7	11.6	2.78	3.29	2.27	2.78	1.54	0.94	0.52	1	2.64	2.63	2.35	2.54	1.12495e-07	0.949748	1.0025	0.988596	0.939511	0.970088	1.28341	1.5259	1.23821	1.28552	1.33443	1.17535	1.30714	5.00894	4.72743	3.97115	3.83681	4.74253	4.59552	4.48039	3.3153	3.72311	3.86408
ENSDARG00000005423	pgam1a	ENSMUSG00000011752	Pgam1	ortholog_one2many	89.7638	89.7638	25	61.17	0	2.78012e-05	206.23	216.55	216.55	213.11	14.55	15.45	15.59	15.1967	26.51	39.88	36.28	34.2233	67.94	69.5	88.47	75.3033	2.3727e-07	316.447	318.511	316.847	313.6	316.351	194.967	197.594	191.954	192.136	189.478	190.88	192.835	263.452	258.332	250.089	247.731	253.751	262.333	255.948	241.142	239.553	234.242
ENSDARG00000005425	wdfy1	ENSMUSG00000073643	Wdfy1	ortholog_one2one	79.0244	79.0244	75	100	1	0.00196033	54.21	54.74	52.55	53.8333	25.74	31.07	27.21	28.0067	4.95	13.07	13.52	10.5133	4.17	2.65	3.07	3.29667	0	10.6944	10.7954	10.4958	10.8058	10.6979	11.7077	11.6213	11.4552	11.4178	11.4984	11.4667	11.5279	14.9075	15.0769	13.6634	13.2484	16.0206	14.2791	14.5327	18.3415	18.6371	18.7274
ENSDARG00000005448	mtfmt	ENSMUSG00000059183	Mtfmt	ortholog_one2one	44.8718	45.3368	0	26.69	0	0.000226855	13.12	12.59	12.69	12.8	16.69	17.23	18.27	17.3967	6.99	7.32	4.61	6.30667	1.55	2.18	1.95	1.89333	1.40966e-09	4.4131	4.26934	4.35531	4.48015	4.37947	5.46158	5.77519	6.44176	6.52868	6.55573	5.49682	6.04329	4.94406	4.47728	5.09562	4.36343	4.73971	4.39035	4.66841	3.7776	3.72992	3.66526
ENSDARG00000005451	gdi2	ENSMUSG00000021218	Gdi2	ortholog_one2one	88.3929	88.9888	50	95.86	1	6.4379e-06	53.12	49.59	46.66	49.79	79.45	80.69	79.08	79.74	48.8	64.46	51.77	55.01	71	64.99	78.27	71.42	5.01272e-08	55.9959	53.4873	52.3754	48.4233	52.5705	60.7909	60.9775	62.5676	63.4833	65.7162	65.4038	63.1566	83.8163	82.608	81.0723	82.9722	86.2488	86.1491	83.8111	82.8446	81.8019	80.7242
ENSDARG00000005453	foxp2	ENSMUSG00000029563	Foxp2	ortholog_one2one	81.4921	79.5518	100	72.17	1	0.0372439	0.62	1.28	0.96	0.953333	2.28	2.85	2.15	2.42667	0.05	0.03	0.06	0.0466667	0.03	0.02	0.00994	0.01998	0.00199178	0	0	0	0	0	0.051023	0.039891	0.0310164	0.06287	0.0264193	0.00652495	0.0362908	0.0675673	0.0542818	0.00682591	0.0339699	0.021177	0.0350909	0.0364855	0.0847153	0.0777711	0.177136
ENSDARG00000005454	tacc3	ENSMUSG00000037313	Tacc3	ortholog_one2one	18.1529	26.8446	0	8.66	0	0.000121794	1.58	0.94	0.51	1.01	2.91	4.09	4.41	3.80333	0.49	0.75	0.32	0.52	0.19	0.36	0.16	0.236667	5.01029e-12	1.69973	1.51488	1.60453	1.43547	1.56365	2.21392	1.95643	2.34262	2.21235	2.57929	2.91211	2.36945	5.43011	5.30595	5.00904	5.33548	5.57389	5.21037	5.3108	1.87366	1.80779	1.57879
ENSDARG00000005456	katnb1	ENSMUSG00000031787	Katnb1	ortholog_one2one	61.5274	64.8936	0	77.74	1	9.89082e-08	42.63	40.35	37.32	40.1	16.63	20.89	17.95	18.49	3.53	2.4	1.42	2.45	2.16	2.64	2.53	2.44333	7.91078e-13	11.6026	11.8352	10.0702	11.2511	11.1898	7.51882	8.16662	8.03387	8.31016	7.58386	7.40504	7.8364	12.5204	12.2133	12.3642	11.6411	13.6974	13.5245	12.6602	14.53	13.5276	14.2508
ENSDARG00000005458	csnk1g2a	ENSMUSG00000003345	Csnk1g2	ortholog_one2many	81.7568	82.1267	0	77.1	1	1.20088e-07	94.48	106.29	98.87	99.88	30.78	31.75	27.92	30.15	9.8	8.6	9.91	9.43667	4.41	4.75	4.28	4.48	7.19694e-08	45.5758	47.9297	48.1338	48.3825	47.5054	46.3914	46.0446	46.3934	49.0804	45.427	43.333	46.1116	64.9554	61.2535	59.6687	58.4411	63.7203	57.3873	60.9044	44.2662	45.2831	43.5083
ENSDARG00000005462	kif4	ENSMUSG00000034311	Kif4	ortholog_one2one	59.8558	60.6824	0	49.84	0	0.00794121	0	0	0.02	0.00666667	0.04	0.02	0.02	0.0266667	0.79	0.28	0.16	0.41	0.08	0.17	0.02	0.09	0.605283	0.196107	0	0.231669	0	0.106944	0.0940326	0	0.0685939	0.104279	0.0182585	0.0360754	0.0535399	0.0679215	0.300115	0.0188697	0.300503	0.136598	0.194012	0.16967	0	0.125412	0.113002
ENSDARG00000005463	slc30a1a	ENSMUSG00000037434	Slc30a1	ortholog_one2many	55.1579	52.0875	75	7.49	1	0.00133311	16.03	16.42	16.95	16.4667	5.09	4.54	5.25	4.96	29.05	60.04	62.09	50.3933	5.26	6.37	4.91	5.51333	1.57232e-06	0.549876	0.513047	0.712053	0.579646	0.588656	1.15353	1.15953	1.35236	1.13303	1.2863	1.00522	1.18166	0.517785	0.57854	0.674601	0.533207	0.512969	0.591603	0.568118	0.132594	0.113031	0.257444
ENSDARG00000005464	dnase1l1	ENSMUSG00000019088	Dnase1l1	ortholog_one2one	39.4322	39.8089	25	22.54	0	1.17394e-06	0	0	0	0	22.86	23.86	24.65	23.79	75.24	76.05	82.02	77.77	6.98	12.11	4.97	8.02	0	4.63088	3.8054	4.21592	4.16069	4.20322	4.48173	4.13645	4.54728	5.2412	5.17389	4.26725	4.6413	5.91532	5.07139	5.29803	4.78498	4.71798	4.64026	5.07133	7.30589	6.9399	8.91115
ENSDARG00000005468	irf2bp1	ENSMUSG00000044030	Irf2bp1	ortholog_one2one	47.2727	48.9726	25	99.59	0	0.00829368	10.12	12.43	12.3	11.6167	25.4	23.91	23.13	24.1467	3.18	3.05	7.66	4.63	6.42	4.9	5.14	5.48667	3.92189e-09	22.4783	21.4853	18.7973	19.6179	20.5947	21.6514	21.9864	23.7256	21.4169	20.2533	21.8273	21.8102	24.8287	24.9846	21.0835	22.9925	24.8732	25.199	23.9936	17.8391	17.5608	17.3209
ENSDARG00000005476	nav3	ENSMUSG00000020181	Nav3	ortholog_one2one	65.1849	62.5951	50	45.12	0	0.00195794	0.53	0.34	0.51	0.46	0.16	0.24	0.16	0.186667	0.89	1.39	1.28	1.18667	0.11	0.09	0.03	0.0766667	4.50806e-06	0	0.0129915	0.00711744	0.00710224	0.00680281	0.0500744	0.0188756	0.00684896	0.00694138	0.00729228	0	0.0150054	0.0203455	0.0532726	0.0376819	0.0825125	0.0545562	0.100733	0.0581836	0.143897	0.135954	0.105308
ENSDARG00000005481	nfkbiaa	ENSMUSG00000021025	Nfkbia	ortholog_one2many	50.3226	49.6815	25	65.81	0	0.00307969	17.15	18.29	17.77	17.7367	45.32	43.8	44.1	44.4067	79.01	50.53	33.45	54.33	4.15	7.12	3.27	4.84667	1.77959e-15	43.0841	47.0866	42.1841	43.5241	43.9697	50.7975	50.5659	50.1864	50.7421	49.6683	51.3382	50.5497	31.2297	30.6645	30.5478	29.4856	30.0217	29.441	30.2317	37.4778	37.0849	37.009
ENSDARG00000005482	rapgef2	ENSMUSG00000062232	Rapgef2	ortholog_one2one	69.5303	75.3012	50	0.91	0	4.6899e-07	11.94	11.32	11.08	11.4467	5.01	5.04	6.12	5.39	0.62	1.01	0.57	0.733333	2.42	2.39	1.76	2.19	0.000492264	0.474572	0.421246	0.54548	0.432661	0.46849	0.817972	0.816044	0.807544	0.873004	0.745173	0.821105	0.813474	1.0795	1.05342	1.14037	1.20137	0.88831	1.16487	1.08797	0.3464	0.449967	0.473016
ENSDARG00000005485	ucmab	ENSMUSG00000026668	Ucma	ortholog_one2many	54.8148	53.6232	0	66.77	0	0.127754	5.18	4.35	5.06	4.86333	631.16	672.01	592.28	631.817	0	0.14	0	0.0466667	0.08	0.1	0.06	0.08	0	6.21807	7.30431	5.66904	6.43338	6.4062	14.2723	14.9361	16.1517	15.2855	14.5777	14.1764	14.9	68.8454	72.0714	69.4434	76.7334	68.65	66.1958	70.3232	115.288	124.715	119.121
ENSDARG00000005500	dgcr6	ENSMUSG00000003531	Dgcr6	ortholog_one2one	62.9442	61.6915	0	69.07	0	0.0390529	54.93	51.68	48.59	51.7333	15.75	14.04	14.45	14.7467	9.87	9.59	30.14	16.5333	1.59	2.65	2.23	2.15667	3.31317e-07	21.4636	22.683	24.5576	23.6183	23.0806	17.5437	18.5371	15.9654	16.5018	15.2787	15.1605	16.4979	16.4362	15.4611	16.5918	16.8265	15.2839	17.095	16.2824	23.5269	21.1477	21.3265
ENSDARG00000005510	gdf6b	ENSMUSG00000051279	Gdf6	ortholog_one2many	58.4158	51.9824	0	0	0	0.550856	0	0	0	0	1.24	1.16	0.69	1.03	0	0	0	0	0	0	0	0	0	5.12806	5.0274	5.87021	5.66334	5.42225	20.5764	22.5771	22.4612	22.2217	23.345	22.4995	22.2802	18.2912	19.0013	16.644	17.6511	16.9078	17.6883	17.6973	7.00274	6.18129	5.49824
ENSDARG00000005513	naca	ENSMUSG00000061315	Naca	ortholog_one2one	95.814	9.4193	25	55.06	0	5.50235e-05	235.33	240.22	225.57	233.707	468.84	515.9	494.68	493.14	184.41	169.29	109	154.233	119.76	111.55	141.89	124.4	0.00361928	19.8055	20.9476	21.5274	21.0633	20.8359	13.8457	14.2018	15.3114	14.646	13.6975	14.6772	14.3966	28.8051	27.4734	29.3179	29.1955	28.8352	29.7026	28.8883	17.751	17.0078	16.9932
ENSDARG00000005518	slc5a9	ENSMUSG00000028544	Slc5a9	ortholog_one2one	70.9285	68.0292	0	44.46	0	0.00257721	0	0	0	0	0.08	0.02	0.03	0.0433333	0.37	0.22	0.44	0.343333	2.25	1.89	0.96	1.7	0.155899	0	0	0	0	0	0	0	0	0	0	0	0	0	0	0	0	0	0	0	0	0	0
ENSDARG00000005522	galr1a	ENSMUSG00000024553	Galr1	ortholog_one2one	70.8934	70.6897	50	90.94	1	1	0	0	0	0	0.03	0	0	0.01	0	0	0	0	0	0	0	0	1	0	0	0	0	0	0	0	0	0	0	0	0	0	0	0	0	0	0	0	0	0	0
ENSDARG00000005525	acy3.2	ENSMUSG00000024866	Acy3	ortholog_one2many	39.3293	40.566	0	0	0	0.012386	0.41	0.57	0.69	0.556667	2.24	2.29	1.99	2.17333	4.5	3.34	1.2	3.01333	4.25	3.87	4.1	4.07333	8.20205e-06	5.50845	4.6479	5.15801	4.10457	4.85473	3.04322	2.02013	2.76445	2.16499	2.34133	3.03997	2.56235	7.27886	7.33038	7.81219	7.50041	7.00653	6.82386	7.29204	7.59015	8.40197	6.41726
ENSDARG00000005526	igfn1.1	ENSMUSG00000051985	Igfn1	ortholog_one2many	37.182	20.007	25	1.5	0	2.10152e-09	14.23	14.64	15.04	14.6367	1.4	1.02	1.57	1.33	0	0.02	0	0.00666667	0.54	0	0.05	0.196667	4.47424e-05	0	0	0	0	0	0	0	0	0	0	0	0	0.0832635	0.0613174	0.0462638	0.0460475	0.0358827	0.0832422	0.0593362	0	0	0
ENSDARG00000005536	ubr7	ENSMUSG00000041712	Ubr7	ortholog_one2many	57.8049	55.7647	100	63.99	1	2.71441e-05	39.18	35.04	35.71	36.6433	15.64	19.12	16.02	16.9267	8.7	9.74	12.93	10.4567	3.32	4	3.14	3.48667	2.74258e-07	14.0703	13.7822	12.2867	12.1397	13.0697	14.3184	14.1253	15.1431	15.1998	13.8288	13.9679	14.4305	9.60232	9.20202	7.85082	8.86661	9.27875	9.12625	8.98779	11.9614	12.0177	9.62691
ENSDARG00000005540	xpo7	ENSMUSG00000022100	Xpo7	ortholog_one2one	94.8671	95.2162	25	99.42	1	0.00299011	1.91	1.88	1.65	1.81333	1.38	1.25	1.37	1.33333	2.57	0.71	3.99	2.42333	1.63	1.96	2.27	1.95333	5.01285e-06	2.12152	2.45538	2.1185	2.08156	2.19424	2.21741	2.16575	2.10738	2.12314	2.05735	2.23638	2.15123	3.12698	2.76031	2.76615	3.03402	2.87485	2.93604	2.91639	1.97731	1.94036	2.03976
ENSDARG00000005541	wif1	ENSMUSG00000020218	Wif1	ortholog_one2one	70.6349	70.4485	50	84.95	1	0.0200609	0	0	0	0	14.06	13.59	13.16	13.6033	0	0.11	0	0.0366667	0.68	0.59	0.03	0.433333	1.26806e-13	0.297028	0.184756	0.202438	0.161605	0.211457	0.106818	0.0715826	0.0389603	0.0789721	0.0414822	0.122942	0.0767929	0.23147	0.265161	0.257225	0.128011	0.177339	0.0881567	0.191227	0.941341	1.75027	1.79714
ENSDARG00000005544	btbd3a	ENSMUSG00000062098	Btbd3	ortholog_one2many	85.9813	86.7924	25	0	0	0.000730124	7.81	6.11	5.8	6.57333	4.01	5.49	5.41	4.97	1.46	1.24	0.56	1.08667	0.65	0.3	0.58	0.51	1.57741e-11	2.54295	2.20475	2.4838	2.17293	2.35111	1.94496	1.66933	2.02996	2.14031	1.76046	1.72195	1.87783	2.80435	2.72177	2.57596	2.72528	2.53353	2.40775	2.62811	3.61145	3.28384	3.50599
ENSDARG00000005547	rint1	ENSMUSG00000028999	Rint1	ortholog_one2one	57.3077	56.4394	0	12.93	0	2.77816e-06	12.32	11.78	11.66	11.92	7	7.63	6.6	7.07667	1.38	0.87	1.59	1.28	0.83	0.65	0.97	0.816667	5.85778e-07	2.68834	2.94562	3.35437	3.12219	3.02763	2.93755	2.99021	3.18715	3.29889	2.7292	2.93872	3.01362	3.12905	3.25703	3.4772	3.25298	3.47247	3.3143	3.31717	2.52177	2.49381	2.57686
ENSDARG00000005549	znf710b	ENSMUSG00000048897	Zfp710	ortholog_one2many	50.7375	51.6517	0	0	0	2.99139e-06	0	0	0	0	0	0	0	0	0	0	0	0	0	0	0	0	1.52227e-05	5.98485	5.23116	5.17848	5.63461	5.50727	3.19412	3.03515	3.04449	3.09941	2.87815	2.71411	2.99424	1.83853	2.1902	1.66752	1.64477	1.80214	1.80717	1.82505	3.16956	2.78138	2.72893
ENSDARG00000005551	hnrnph1l	ENSMUSG00000007850	Hnrnph1	ortholog_many2many	82.801	71.3983	0	52.01	0	6.88612e-05	40.81	40.13	39.19	40.0433	43.5	47.04	44.13	44.89	23.13	23.65	27.63	24.8033	5.18	5.44	5.68	5.43333	0	23.2296	22.9498	23.2623	23.0616	23.1258	39.2289	41.2916	40.5289	41.5351	43.3246	43.7882	41.6162	18.1426	17.4837	17.6143	16.8938	18.6763	17.9823	17.7988	15.2178	15.1345	15.0743
ENSDARG00000005559	pou4f1	ENSMUSG00000048349	Pou4f1	ortholog_one2one	84.5109	73.8717	50	100	1	2.31846e-05	34.83	33.71	38.41	35.65	0.1	0.11	0.13	0.113333	0.03	0.04	0.21	0.0933333	0.00827	0.00638	0	0.00488333	5.13331e-07	0	0	0	0.0209875	0.00524687	0	0	0	0	0	0	0	0	0.0590338	0.0222704	0	0	0.0457954	0.0211833	0.127567	0.0845794	0.155596
ENSDARG00000005560	ywhah	ENSMUSG00000018965	Ywhah	ortholog_one2one	84.5528	84.5528	50	56.04	0	5.50669e-06	35.14	32.07	30.99	32.7333	29.75	31.36	28.71	29.94	2.9	3.47	2.74	3.03667	5.93	7.05	6.66	6.54667	9.09881e-09	60.391	61.7984	60.9285	65.0672	62.0463	52.7084	57.5283	54.5136	55.4599	54.3675	56.2468	55.1374	97.6237	93.9567	95.0793	96.3197	97.7583	102.462	97.1999	67.8812	66.5977	66.447
ENSDARG00000005561	gfm2	ENSMUSG00000021666	Gfm2	ortholog_one2one	66.0105	64.57	50	68.26	0	0.00532456	8.78	9.06	8.22	8.68667	4.69	5.75	3.69	4.71	5.89	2.78	4.98	4.55	1.57	1.76	2.01	1.78	0.571853	3.9637	3.5419	3.8165	3.90012	3.80556	3.41296	3.21122	3.32741	3.18396	3.32607	3.28585	3.29124	2.49738	2.61566	2.98947	2.90765	2.74917	2.77332	2.75544	2.73314	2.27441	2.37147
ENSDARG00000005565	entpd8	ENSMUSG00000036813	Entpd8	ortholog_one2one	46.1694	46.0765	0	29.34	0	0.00143603	0.31	0.15	0.21	0.223333	1.95	2.52	2.3	2.25667	3.2	3.68	1.46	2.78	9.53	8.64	5.02	7.73	0.00545854	0.13276	0.165158	0.253349	0.108347	0.164903	0.954872	0.831861	0.975171	0.98833	1.11246	0.95247	0.969193	3.03478	2.43806	2.26107	2.97523	2.77423	2.71878	2.70036	6.76848	6.18567	5.89052
ENSDARG00000005574	vsx2	ENSMUSG00000021239	Vsx2	ortholog_one2one	69.3548	67.8947	25	28.83	0	0.614294	0	0	0	0	0.14	0.03	0.08	0.0833333	0	0	0.33	0.11	0.06	0.03	0.06	0.05	6.79803e-12	0	0	0	0	0	0	0	0	0	0	0	0	0	0	0	0	0	0	0	0	0	0
ENSDARG00000005576	mphosph8	ENSMUSG00000079184	Mphosph8	ortholog_one2one	39.3875	43.4732	25	48.87	0	7.03025e-09	31.08	29.77	28.99	29.9467	27.46	31.68	26.85	28.6633	4.9	6.32	6.59	5.93667	11.94	13.71	10.52	12.0567	6.89505e-09	6.3324	6.02706	6.35725	5.79681	6.12838	8.94041	8.454	8.09507	8.04396	8.42252	7.73823	8.28237	6.84077	7.07588	8.00811	7.97065	7.05133	6.62274	7.26158	8.36538	8.31963	7.41366
ENSDARG00000005578	ugp2a	ENSMUSG00000001891	Ugp2	ortholog_one2many	82.2485	82.0866	25	3.54	0	6.73136e-05	1.39	1.14	0.81	1.11333	1.1	1.08	0.94	1.04	0.69	0.05	0	0.246667	81.34	87.26	129.23	99.2767	0.00212799	32.2685	36.3223	34.8356	37.445	35.2179	19.8512	19.9544	20.0575	20.5155	21.323	21.0975	20.4665	47.1047	49.3077	51.9389	47.2755	47.9626	50.1602	48.9583	41.6553	40.6872	40.9103
ENSDARG00000005586	zbtb20	ENSMUSG00000022708	Zbtb20	ortholog_one2one	65.2111	60.4588	0	91.33	1	0.000213921	49.31	51.06	49.1	49.8233	18.4	19.8	18.82	19.0067	5.77	4.54	8.8	6.37	0.03	0.02	0.00937	0.01979	1.19015e-11	9.27208	9.49337	9.32111	9.29802	9.34614	14.817	14.7471	15.0805	14.576	14.4971	14.6228	14.7234	30.4838	31.5386	30.3881	29.6865	30.918	30.3424	30.5596	31.9556	31.5687	31.9016
ENSDARG00000005590	mtf2	ENSMUSG00000029267	Mtf2	ortholog_one2one	62.4793	63.7437	75	53.56	1	0.00068325	0.34	0.86	0.65	0.616667	1.25	1.44	1.52	1.40333	0.52	0.16	0.04	0.24	0.08	0.17	0.11	0.12	0	8.80867	9.25451	8.72609	9.3958	9.04627	9.78208	9.29939	9.57515	9.923	9.82389	9.96693	9.72841	9.56345	9.74533	9.84232	9.45096	10.7072	9.81916	9.85473	12.8654	13.9913	13.7238
ENSDARG00000005595	adgb	ENSMUSG00000050994	Adgb	ortholog_one2one	6.05031	25	100	36.61	0	2.81038e-09	3.18	3.27	3.7	3.38333	0.04	0.04	0.03	0.0366667	0	0.05	0	0.0166667	0.04	0.01	0.00708	0.0190267	0.00158144	0	0	0	0	0	0	0	0	0	0	0	0	0	0	0	0	0	0	0	0	0	0
ENSDARG00000005606	paxip1	ENSMUSG00000002221	Paxip1	ortholog_one2one	60.0713	63.8258	50	91.56	1	0.00190372	4.54	5.37	5.74	5.21667	1.95	2.85	2.06	2.28667	1.17	1.92	2.3	1.79667	1.48	1.34	1.44	1.42	2.2105e-07	2.43876	2.59074	2.18131	2.23628	2.36177	2.99572	2.90564	3.43607	3.46787	3.01557	3.34204	3.19382	3.16038	3.01931	2.64192	2.8815	2.96118	3.04165	2.95099	4.24392	4.05549	2.93689
ENSDARG00000005612	aph1b	ENSMUSG00000053040	Aph1c	ortholog_one2many	63.1783	63.1783	25	100	1	8.82571e-05	58.82	55.18	54.71	56.2367	15.98	16.99	17.27	16.7467	9.3	17.17	14.79	13.7533	7.19	8.3	7.6	7.69667	0	9.05438	7.83952	8.17445	7.5165	8.14621	7.05606	6.10812	6.30378	6.35202	6.57642	6.09562	6.41534	9.51588	12.1521	9.2953	10.5053	10.0468	9.78321	10.2164	10.229	11.4447	11.4523
ENSDARG00000005616	bfb	ENSMUSG00000092511	Gm20547	ortholog_many2many	28.6026	10.2665	50	1.33	0	3.40912e-06	0	0	0	0	0	0	0	0	0	0	0	0	360.28	443.91	332.92	379.037	0.0429791	0	0.160883	0	0.100516	0.0653497	0.0664397	0.111309	0.121164	0.0736797	0.103206	0.0509789	0.0877962	0.503902	0.235611	0.773289	0.212323	0.220606	0.795071	0.4568	0.38185	0.20254	0.133072
ENSDARG00000005619	nek2	ENSMUSG00000026622	Nek2	ortholog_one2one	67.2727	66.8172	75	74.86	1	0.0697192	0	0	0	0	0	0.03	0	0.01	0.18	0.05	0.76	0.33	0.09	0.14	0.05	0.0933333	1.05763e-10	2.01533	2.244	2.15413	2.30152	2.17875	4.70733	4.67412	4.37608	4.62611	4.4141	5.17561	4.66223	0.0207329	0.101788	0.0691191	0.0687959	0.0714794	0.0473774	0.0632155	0.219956	0.350004	0.252954
ENSDARG00000005625	tmem57a	ENSMUSG00000028826	Tmem57	ortholog_one2many	82.9819	82.9819	25	77.87	1	9.62844e-05	10.68	10.63	10.04	10.45	9.33	9.75	10.27	9.78333	3.36	4.22	8.95	5.51	3.52	3.24	3.09	3.28333	1.84772e-13	3.67445	4.21542	3.65719	3.85294	3.85	4.43356	4.22477	4.36049	3.75146	3.85153	3.92294	4.09079	3.67911	3.57162	4.11931	3.50116	3.38245	3.55325	3.63448	1.51708	1.91894	1.78625
ENSDARG00000005627	zmp:0000000527	ENSMUSG00000105504	Gbp5	ortholog_many2many	30.6477	32.8814	50	52.46	0	0.0902446	0	0.02	0.01	0.01	0.76	0.69	0.67	0.706667	1.78	1.38	1.36	1.50667	0.34	1.41	0.42	0.723333	4.12343e-10	0	0	0	0	0	0	0	0	0	0	0	0	0	0	0	0	0	0	0	0	0	0
ENSDARG00000005629	smyd2b	ENSMUSG00000026603	Smyd2	ortholog_one2many	62.4714	63.0485	25	0	0	0	0	0	0	0	0.1	0.14	0.18	0.14	0.06	0.07	0.08	0.07	0.1	0.13	0.07	0.1	7.80543e-09	15.2894	14.9523	16.6726	15.2656	15.545	57.4728	58.4112	60.8337	61.6546	56.6194	57.4356	58.7379	32.7032	32.6866	32.1295	30.7214	34.9295	32.4439	32.6023	22.0088	19.5614	19.3021
ENSDARG00000005640	adat3	ENSMUSG00000113640	Adat3	ortholog_one2many	48.5119	46.7049	25	84.06	0	0.0400097	0.49	1.15	1.22	0.953333	1.39	1.05	0.87	1.10333	1.27	1.13	2.59	1.66333	3.34	1.74	1.91	2.33
ENSDARG00000005643	gcat	ENSMUSG00000006378	Gcat	ortholog_one2one	67.7494	70.1923	0	69.56	0	0.000249757	10.68	11.05	11.15	10.96	22.86	23.2	24.98	23.68	4.19	8.27	8.55	7.00333	46.36	45.76	72.46	54.86	0.000178843	9.33635	10.9685	10.0534	11.0504	10.3522	5.36313	5.12035	4.86165	5.72358	4.65348	5.4495	5.19528	14.8553	17.2841	15.7246	15.7318	16.1778	16.0842	15.9763	15.1926	15.6225	14.4003
ENSDARG00000005645	robo3	ENSMUSG00000032128	Robo3	ortholog_one2one	47.4982	48.0742	75	4.13	0	0.000192449	9.29	8.77	8.04	8.7	0.22	0.18	0.14	0.18	0.06	0.02	0	0.0266667	0.03	0.06	0.04	0.0433333	0.0113094	0	0	0	0	0	0	0	0	0	0	0	0	0	0	0	0	0	0	0	0	0	0
ENSDARG00000005648	olfml2a	ENSMUSG00000046618	Olfml2a	ortholog_one2many	60.7752	57.5624	0	52.7	0	0.29574	0	0	0	0	13.46	12.97	11.8	12.7433	0.04	0	0	0.0133333	0	0.02	0	0.00666667	1.07777e-09	0.759135	1.02878	0.669297	0.826047	0.820815	1.65738	1.44802	1.84741	1.88951	1.42561	1.4262	1.61569	1.40973	1.36774	1.02574	1.31794	1.46579	1.26556	1.30875	1.17511	1.11556	1.50776
ENSDARG00000005651	hrasb	ENSMUSG00000025499	Hras	ortholog_one2many	94.1799	94.1799	25	100	1	0.00450799	0.11	0.04	0.03	0.06	9.65	9.43	10.55	9.87667	2.34	0.86	0.72	1.30667	0.54	0.52	0.19	0.416667	1.34536e-05	6.54168	5.95789	5.79104	5.85747	6.03702	5.53266	6.39914	5.26863	5.05734	4.63876	4.92903	5.30426	8.07629	8.004	8.19446	7.01872	8.41664	8.05274	7.96047	9.49947	9.3152	9.34726
ENSDARG00000005652	man1a1	ENSMUSG00000003746	Man1a	ortholog_one2one	72.3301	68.2443	75	79.51	1	1.00593e-09	6.94	7.14	6.49	6.85667	0.39	0.31	0.28	0.326667	2.86	3.35	1.68	2.63	8.4	5.7	6.3	6.8	6.672e-05	2.32788	2.24746	2.10456	2.20832	2.22206	1.49783	1.71659	1.84771	1.54466	1.71167	1.73489	1.67556	10.7295	11.3168	11.1422	11.193	11.2613	11.0781	11.1202	4.64968	4.66787	5.29679
ENSDARG00000005670	ttbk2a	ENSMUSG00000090100	Ttbk2	ortholog_one2many	43.2523	39.3293	0	75.65	0	0.000304855	6.22	6.95	6.49	6.55333	1.03	1.31	1.31	1.21667	0	0	0	0	0.01	0.03	0.01	0.0166667	5.1585e-11	0.76633	0.660457	0.827045	0.59317	0.711751	0.909163	0.639725	0.95336	0.747774	0.917976	0.967915	0.855985	0.41865	0.65288	0.583818	0.72636	0.433948	0.393923	0.53493	0.644447	0.779501	0.965107
ENSDARG00000005673	f3b	ENSMUSG00000028128	F3	ortholog_one2many	34.3537	34.3537	75	0	0	0.00290448	2.62	3	3.57	3.06333	18.16	18.84	22.73	19.91	2.53	1.68	1.54	1.91667	0.64	0.81	0.45	0.633333	0	7.16751	6.70742	7.11602	7.52766	7.12965	7.04459	6.77186	6.58567	7.50885	5.89641	7.08459	6.81533	25.4175	24.3026	24.4163	24.3021	26.1869	25.4004	25.0043	25.4718	24.6288	25.1917
ENSDARG00000005675	sec61a1l	ENSMUSG00000030082	Sec61a1	ortholog_one2many	97.0588	97.0588	0	45.84	0	0.0015668	0	0	0	0	0	0	0	0	0	0	0	0	0	0	0	0	6.58051e-15	97.6202	111.701	94.7894	106.283	102.598	91.3195	100.246	89.7109	89.7826	87.8458	87.1086	91.0023	223.296	202.512	218.574	197.568	219.356	223.348	214.109	128.459	112.847	112.55
ENSDARG00000005679	trip10a	ENSMUSG00000019487	Trip10	ortholog_one2many	53.4224	58.5009	0	8.28	0	1.08899e-05	8.55	7.87	7.66	8.02667	14.45	14.58	12.87	13.9667	28.17	26.22	34.71	29.7	1.82	1.96	1.53	1.77	0	3.06928	3.60289	3.69024	3.12573	3.37203	2.64154	3.33806	3.13813	2.84569	3.60504	2.30191	2.97839	14.2693	13.3687	12.9946	13.3408	14.0961	13.9212	13.6651	6.0727	5.65123	5.12443
ENSDARG00000005690	slc25a23a	ENSMUSG00000046329	Slc25a23	ortholog_many2many	66.8763	68.3083	50	2.83	0	0.00421886	4.32	4.17	4.66	4.38333	3.66	4.97	4.42	4.35	0.94	2.67	1.27	1.62667	0.84	0.92	0.85	0.87	0.174953	6.58726	5.97984	7.18321	6.11214	6.46561	2.57909	2.55969	2.87564	2.5162	2.35814	2.53628	2.57084	7.67573	6.59905	6.19095	6.84667	5.87391	6.2441	6.57174	5.4976	4.90771	5.7476
ENSDARG00000005699	ddx19	ENSMUSG00000015023	Ddx19a	ortholog_one2many	84.5996	86.1925	25	8.41	0	0.00302501	23.26	23.89	23.84	23.6633	16.28	16.12	17.43	16.61	6.23	15.69	15.13	12.35	4.37	4.33	6.16	4.95333	0.216134	2.34648	2.45659	1.92738	2.95122	2.42042	1.8119	2.43823	1.72677	1.75007	2.04283	1.84995	1.93662	3.35636	3.32671	2.88532	3.43218	3.63883	3.69015	3.38826	3.76232	3.50789	3.23102
ENSDARG00000005704	eps8l3b	ENSMUSG00000040600	Eps8l3	ortholog_one2many	33.121	34.6667	25	0	0	0.000247336	0	0	0	0	0	0	0	0	0	0	0.07	0.0233333	1.47	0.38	0.05	0.633333	0.0159093	0.317432	0	0.389419	0	0.176713	0	0	0.0416366	0.0421984	0	0.0875912	0.028571	0	0.0404823	0	0.136804	0	0.0471062	0.0373988	0	0.1305	0.228642
ENSDARG00000005713	ethe1	ENSMUSG00000064254	Ethe1	ortholog_one2one	56.2724	61.811	0	63.88	0	0.00349535	10.14	10.96	9.93	10.3433	13.63	12.56	13.57	13.2533	4.14	4.47	3.9	4.17	6.98	6.46	5.91	6.45	4.03691e-06	33.8827	32.0288	31.8495	32.1119	32.4682	14.5579	16.3312	14.5276	15.3048	14.1789	12.0639	14.4941	32.8083	31.9667	34.846	32.5895	29.2928	30.3489	31.9754	44.8466	46.8647	41.6376
ENSDARG00000005716	olfml2ba	ENSMUSG00000038463	Olfml2b	ortholog_one2many	41.4496	49.0617	25	34.21	0	0.269687	0	0	0	0	0.6	1	0.62	0.74	0	0.15	0.12	0.09	0.03	0.03	0.01	0.0233333	5.85918e-09	2.79504	2.14422	2.50818	2.18601	2.40836	0	0	0	0	0	0	0	1.30083	1.3664	1.71451	1.47227	1.5297	1.69368	1.5129	1.34796	1.72362	1.94612
ENSDARG00000005738	rpf1	ENSMUSG00000028187	Rpf1	ortholog_one2one	70.1705	70.7736	50	5.55	0	0.00581374	22.61	23.97	26.41	24.33	31.77	39.12	30.74	33.8767	12.47	19.53	29.76	20.5867	3.81	4.37	4.22	4.13333	7.7652e-06	8.1642	8.49355	10.6834	9.85511	9.29906	10.7524	11.2491	10.5545	11.3916	11.1647	10.9096	11.0036	8.18893	8.46275	9.07492	9.03248	9.82675	9.35639	8.99037	8.56765	8.71174	7.95365
ENSDARG00000005739	gpm6ba	ENSMUSG00000031342	Gpm6b	ortholog_one2many	73.0104	64.3293	25	0	0	0.0559013	0	0.09	0.03	0.04	0.11	0.23	0.15	0.163333	0.51	1.37	0.35	0.743333	0.12	0.21	0.16	0.163333	1.77959e-15	4.63428	4.53208	4.54468	4.14977	4.4652	7.91632	7.58522	7.51388	6.26335	7.58675	7.56605	7.40526	8.79451	9.22636	8.24947	9.28348	9.56874	9.34149	9.07734	16.3011	18.0113	17.302
ENSDARG00000005749	cand2	ENSMUSG00000030319	Cand2	ortholog_one2one	58.2453	58.0567	25	15.18	0	0.0823894	0	0	0	0	0.19	0.1	0.21	0.166667	0	0.03	0	0.01	0.01	0.00925	0.01	0.00975	0	1.07001	0.966598	0.987301	1.23597	1.06497	0.647251	0.5078	0.63913	0.78781	0.643716	0.690441	0.652691	2.89065	2.72077	2.39495	2.5351	2.29982	2.99007	2.63856	0.671407	0.613595	0.645026
ENSDARG00000005754	ptprfb	ENSMUSG00000033295	Ptprf	ortholog_one2many	76.2393	70.4953	50	3.17	0	7.09342e-07	3.83	5.08	4.36	4.42333	4.27	5.11	4.58	4.65333	0.17	0.07	0.02	0.0866667	15.33	10.01	12.8	12.7133	6.32345e-13	7.76751	7.13123	7.11414	7.72185	7.43368	14.3869	15.1563	14.4787	14.3172	13.7177	14.4778	14.4224	32.7345	32.0917	30.3709	30.7846	32.4922	31.0506	31.5874	21.2916	21.9975	21.8049
ENSDARG00000005762	col14a1a	ENSMUSG00000022371	Col14a1	ortholog_one2many	52.342	39.2419	100	37.05	1	3.46534e-08	0.27	0.26	0.32	0.283333	1.82	2.72	1.79	2.11	0.04	0.04	0.03	0.0366667	0.12	0.17	0.13	0.14	8.09928e-15	0.0128491	0.0127878	0.0420348	0.0139817	0.0204133	0.0123223	0	0	0	0.0287116	0.0425466	0.0139301	0.160211	0.196639	0.103854	0.0738348	0.107401	0.0457628	0.114617	0	0	0
ENSDARG00000005772	tsr2	ENSMUSG00000025264	Tsr2	ortholog_one2one	43.617	42.0513	0	82.46	0	0.000721339	31.64	34.06	31.95	32.55	41.72	43.81	43.13	42.8867	19.18	23.97	33.54	25.5633	6.32	6.93	5.78	6.34333	1.70731e-10	15.3698	17.1112	15.2366	16.003	15.9301	9.65224	10.6156	10.2385	9.59586	11.1393	10.2466	10.248	13.8292	12.8782	13.5084	13.4724	13.5455	13.6358	13.4782	9.2414	9.47645	9.77083
ENSDARG00000005774	ddx3b	ENSMUSG00000069045	Ddx3y	ortholog_many2many	71.8023	75.076	25	23.79	0	6.84293e-06	0	0	0	0	0	0	0	0	0	0	0	0	0	0	0	0	0.0018337	17.1997	17.1367	16.702	17.461	17.1249	13.6194	13.4309	14.4588	13.7137	14.3426	13.9358	13.9169	0.499199	0.74505	0.399414	0.441718	0.573685	0.456294	0.519227	1.71591	1.43264	1.59461
ENSDARG00000005775	scn8aa	ENSMUSG00000023033	Scn8a	ortholog_one2many	83.3761	82.1537	25	19.47	0	1.98995e-06	2.22	1.73	1.32	1.75667	0.09	0.1	0.09	0.0933333	0.07	0.17	0.01	0.0833333	0	0	0	0	0	0.137173	0.210465	0.124652	0.155483	0.156943	0.575522	0.617083	0.473803	0.449805	0.472543	0.485755	0.512418	0.267242	0.227418	0.270579	0.315293	0.266169	0.264629	0.268555	0.126008	0.106521	0.10539
ENSDARG00000005776	guk1b	ENSMUSG00000020444	Guk1	ortholog_one2many	70	63.9269	0	0	0	0.550856	0.2	0.08	0.09	0.123333	0	0	0	0	0.45	0	0	0.15	0	0	0	0	9.78847e-08	181.695	186.155	195.134	194.985	189.492	79.4462	81.3742	78.1188	81.8886	78.9507	79.8389	79.9362	65.6174	66.4339	65.4336	68.7395	65.0879	63.429	65.7902	81.8474	85.276	80.2496
ENSDARG00000005783	ncanb	ENSMUSG00000002341	Ncan	ortholog_one2many	35.4067	35.0158	75	45.91	0	4.93312e-05	2.98	3.57	3.3	3.28333	0	0	0	0	0	0	0	0	0	0.00439	0	0.00146333	9.59122e-08	0	0	0	0	0	0.0120106	0	0	0	0	0	0.00200176	0	0	0.0144611	0	0	0.0148684	0.00488824	0	0.0137302	0
ENSDARG00000005786	ppm1f	ENSMUSG00000026181	Ppm1f	ortholog_one2one	50.7075	47.5664	75	4.11	1	0.000466184	0	0	0	0	0.11	0.12	0.13	0.12	1.36	1.34	2.25	1.65	0.03	0.06	0.01	0.0333333	2.29559e-05	2.1054	2.64195	2.15612	2.03199	2.23387	2.47555	2.47078	2.65112	2.39484	2.61818	2.02072	2.43853	2.9295	2.54027	2.47329	2.23028	2.22983	2.49949	2.48378	3.41063	3.1712	3.67122
ENSDARG00000005789	enpp1	ENSMUSG00000037370	Enpp1	ortholog_one2one	52.0501	50.4415	0	16.33	0	2.76362e-05	12.66	11.84	10.97	11.8233	2.73	1.79	1.74	2.08667	52.64	63.35	73.46	63.15	15.76	12.84	11.72	13.44	9.55715e-13	0.0175706	0.0437168	0.076641	0.114716	0.0631611	2.38429	2.4221	2.64578	2.69083	2.70907	2.66661	2.58645	4.13516	4.44573	4.20977	4.40211	4.2696	4.11976	4.26369	1.70444	1.55065	1.90345
ENSDARG00000005791	rpl28	ENSMUSG00000030432	Rpl28	ortholog_one2one	77.5362	78.1022	0	61.71	0	0.0019139	69.53	63.89	60.19	64.5367	276.71	369	299.95	315.22	489.79	384.76	172.31	348.953	594.71	476.75	585.65	552.37	0.494303	38.689	40.2588	40.1064	39.8609	39.7288	20.8056	23.8408	20.0419	21.5103	22.1052	19.946	21.375	44.2706	43.0197	47.4999	47.7843	40.9934	40.7564	44.054	35.1441	34.7371	32.6222
ENSDARG00000005799	smim14	ENSMUSG00000105835	Gm43552	ortholog_one2many	23.301	82.7586	100	71.84	0	9.88125e-05	3.07	2.21	2.47	2.58333	22.49	18.86	22.82	21.39	28.17	18.34	14.25	20.2533	83	65.5	61.04	69.8467	0.154884	0	0	0	0.26864	0.06716	0	0	0	0	0	0	0	0.25652	0	0.570122	0.283728	0.294795	0	0.234194	0.272142	0.270654	0.284518
ENSDARG00000005800	ampd3a	ENSMUSG00000005686	Ampd3	ortholog_one2many	71.5019	72.7154	100	9.43	1	6.93117e-07	4.96	4.72	4.21	4.63	0.48	0.27	0.33	0.36	0.05	0.07	0	0.04	0.08	0.1	0.02	0.0666667	9.60112e-12	2.68484	2.84802	2.78749	2.62409	2.73611	2.12764	2.09221	1.85571	1.89785	2.04767	1.77448	1.96593	1.83752	2.19792	1.93058	1.73679	1.70855	1.88953	1.88348	0.939268	1.21613	1.01904
ENSDARG00000005814	klhl10a	ENSMUSG00000001558	Klhl10	ortholog_one2many	56.1404	52.6316	0	96.09	1	0.132942	0	0	0	0	0.03	0.06	0.08	0.0566667	0	0	0	0	0.09	0.06	0.02	0.0566667	0.00831632	0.250192	0.290497	0.0454712	0.272245	0.214601	0.199944	0.120591	0.175024	0.177386	0.139765	0.230125	0.173806	0.823214	1.40392	0.770364	0.862607	1.19501	0.792064	0.974529	0	0.0457144	0
ENSDARG00000005821	ncf2	ENSMUSG00000026480	Ncf2	ortholog_one2one	45	42.8571	0	23.84	0	4.71484e-05	0	0	0	0	2.79	2.9	3.2	2.96333	106.5	155.89	165.06	142.483	0.5	1.74	0.31	0.85	9.45842e-09	0.216821	0.3021	0.3783	0.495458	0.34817	0.187138	0.16721	0.136511	0.161412	0.169572	0.191453	0.168883	1.0138	1.19454	0.675957	1.14624	1.0615	1.13259	1.03744	1.64916	2.13931	1.97403
ENSDARG00000005823	slc39a10	ENSMUSG00000025986	Slc39a10	ortholog_one2one	45.1004	45.8583	75	27.04	0	0.000144488	0.27	0.34	0.49	0.366667	1.1	1.3	1.33	1.24333	2.11	1	2.22	1.77667	0.64	0.29	0.24	0.39	0	3.84395	3.6196	3.28888	3.58752	3.58499	2.52371	2.63661	2.74595	2.86162	2.8411	2.92097	2.75499	4.88503	5.21896	4.26773	4.51963	4.89012	5.8974	4.94648	11.2288	10.7946	10.7853
ENSDARG00000005827	eif2s1a	ENSMUSG00000021116	Eif2s1	ortholog_one2many	94.9206	94.9206	50	91.44	1	0.000617389	23.14	19.23	20.44	20.9367	38.68	40.83	38.7	39.4033	17.45	21.96	28.75	22.72	11.39	11.54	12.95	11.96	5.04655e-12	24.6647	25.5478	25.2801	26.7236	25.554	18.5268	19.0568	18.0505	19.0258	19.0414	19.3078	18.8348	20.9258	18.09	18.5482	20.4688	21.5201	20.0132	19.9277	18.6703	19.0614	20.5563
ENSDARG00000005828	faima	ENSMUSG00000096316	Faiml	ortholog_many2many	63.6871	64.0449	0	98.24	1	0.000153572	12.8	10.24	9.95	10.9967	1.92	1.53	1.43	1.62667	0.68	0.37	0.38	0.476667	0.21	0.19	0.26	0.22	1	0	0	0	0	0	0	0	0	0	0	0	0	0	0	0	0	0	0	0	0	0	0
ENSDARG00000005834	gatad2b	ENSMUSG00000042390	Gatad2b	ortholog_one2one	67.2334	73.2323	25	95.77	1	7.53304e-06	0.24	0.26	0.24	0.246667	0.02	0.12	0	0.0466667	0.19	0.07	0.11	0.123333	1.06	0.46	0.84	0.786667	5.40993e-08	0.250817	0.326426	0.199872	0.220439	0.249389	0.878869	0.920638	0.819944	0.769452	0.689792	0.798575	0.812878	0.561318	0.875949	0.690604	0.720635	0.575957	0.698605	0.687178	1.41432	1.35371	1.11176
ENSDARG00000005840	got2b	ENSMUSG00000031672	Got2	ortholog_one2many	78.271	77.907	25	0	0	3.43627e-08	186.51	198.08	185.05	189.88	48.81	52.49	48.71	50.0033	27.38	34.41	35.9	32.5633	16.38	16.16	17.95	16.83	0.0310728	44.8986	52.4901	44.5891	50.4492	48.1068	28.4487	29.5376	26.154	26.7664	26.4448	27.3947	27.4577	47.9921	41.6109	45.6037	41.1839	50.6159	49.2886	46.0492	24.8618	22.0125	22.3366
ENSDARG00000005841	tnni2a.2	ENSMUSG00000031097	Tnni2	ortholog_one2many	60.2273	58.2418	50	0	0	0.0179216	1.62	1.33	1.4	1.45	1.09	1.44	1.17	1.23333	0.29	0.3	0.37	0.32	0.05	0.05	0.03	0.0433333	3.70031e-07	0.120389	0.359441	0	0.1965	0.169083	0.230904	0.290132	0.378985	0.256066	0.201758	0.199318	0.259527	0.25018	0.307065	0.764543	0.553431	0.359387	0.571694	0.467716	0.265416	0.0659911	0.346858
ENSDARG00000005842	cd9a	ENSMUSG00000030342	Cd9	ortholog_one2many	59.2105	59.7345	50	0.83	0	5.93245e-06	0	0	0	0	0.79	0.55	0.64	0.66	21.49	25.85	19.23	22.19	68.1	75.26	57.16	66.84	0	392.671	397.069	417.523	418.886	406.537	224.538	230.508	230.794	229.923	240.512	242.616	233.149	422.342	432.824	415.528	427.011	424.716	434.507	426.155	691.436	678.424	673.597
ENSDARG00000005861	ralgapa2	ENSMUSG00000037110	Ralgapa2	ortholog_one2one	63.2944	65.1832	50	100	1	9.4857e-09	2.39	2.8	2.38	2.52333	0.87	1.09	0.99	0.983333	0.41	0.85	1.01	0.756667	5	6.43	3.98	5.13667	1.3777e-07	0.196406	0.127054	0.165985	0.149602	0.159762	0.63098	0.780994	0.60283	0.67885	0.64185	0.661187	0.666115	0.979562	0.916747	1.02052	1.02703	0.885334	1.10173	0.988486	0.70905	0.689024	0.696025
ENSDARG00000005867	gon4l	ENSMUSG00000054199	Gon4l	ortholog_one2many	34.9392	32.025	0	29.69	0	0.000794214	2.8	3.5	3.2	3.16667	2.57	2.92	2.69	2.72667	1.03	0.62	2.16	1.27	1.04	1.32	1.21	1.19	3.74816e-09	2.37429	2.18041	2.78911	2.22874	2.39314	3.56687	3.18268	3.79596	3.43537	4.12136	3.90281	3.66751	3.1764	4.16895	2.6003	3.84122	3.407	3.07276	3.37777	2.93177	3.72008	3.89889
ENSDARG00000005870	mmadhc	ENSMUSG00000026766	Mmadhc	ortholog_one2many	61.6162	61.8243	75	49.02	1	8.78169e-06	67.6	67.66	68.06	67.7733	32.31	33.15	30.17	31.8767	8.98	6.02	4.32	6.44	14.94	16.54	14.8	15.4267	1.90229e-07	42.6818	43.9489	42.685	42.3014	42.9043	33.5442	31.6031	33.6024	33.5795	30.5234	32.8237	32.6127	52.12	53.0501	49.7483	51.8318	51.5006	53.4359	51.9478	54.7017	55.63	53.8859
ENSDARG00000005883	rfx1a	ENSMUSG00000031706	Rfx1	ortholog_one2many	66.6667	62.0976	25	15.84	0	4.7955e-06	4.39	4.51	4.43	4.44333	0.82	0.55	0.72	0.696667	0.56	1.2	1.21	0.99	0.2	0.32	0.15	0.223333	5.75302e-06	0.420359	0.599637	0.641745	0.487905	0.537411	0.833119	0.823945	0.896899	1.29645	1.22109	1.06713	1.02311	0.931785	1.02929	1.13253	1.09503	0.819844	0.848373	0.976141	0.818628	1.09065	0.726669
ENSDARG00000005891	cyb5r3	ENSMUSG00000018042	Cyb5r3	ortholog_one2one	71.1409	70.4319	0	36.26	0	0.000718485	16.03	16.9	19.15	17.36	13.8	15.3	15.46	14.8533	24.8	18.69	11.97	18.4867	9.65	12.78	11.12	11.1833	0	97.8683	96.7124	92.4334	96.4566	95.8677	72.5428	73.486	75.7246	78.1511	70.5069	75.1387	74.2583	285.791	286.266	267.696	274.009	270.203	277.551	276.919	194.781	195.095	187.426
ENSDARG00000005894	slc7a9	ENSMUSG00000030492	Slc7a9	ortholog_one2one	67.0732	67.7618	75	93.52	1	6.59239e-05	4.1	4.23	5.22	4.51667	0.04	0	0	0.0133333	1.89	0.73	1.18	1.26667	2.5	2.07	1.07	1.88	0.0819148	0.101021	0	0.0734405	0.0732837	0.0619364	0	0	0	0	0	0	0	0.139955	0.0343555	0	0	0	0	0.0290517	0	0	0
ENSDARG00000005897	dera	ENSMUSG00000030225	Dera	ortholog_one2one	75.1572	75.1572	50	61.47	0	0.00121273	12.21	11.35	10.93	11.4967	9.06	10.87	9.29	9.74	2.06	3.22	6.87	4.05	15.07	12.55	15.61	14.41	0.000193175	17.2882	17.6362	17.3916	18.7817	17.7744	8.80485	8.0436	8.87293	8.66619	8.10656	8.37816	8.47871	6.88668	6.7478	7.45957	7.56901	7.7143	7.42122	7.29976	9.92089	9.62188	9.95395
ENSDARG00000005908	clk4b	ENSMUSG00000026034	Clk1	ortholog_many2many	56.8548	58.3851	25	0	0	0.000145907	28.16	37.89	34.25	33.4333	17.71	17.77	17.2	17.56	13.73	11.89	8.6	11.4067	5.87	5.73	6.27	5.95667	0	24.7883	24.1516	23.5508	24.4652	24.239	25.2383	25.0491	26.2205	26.1148	26.2588	26.4183	25.8833	22.7742	23.2551	23.8367	22.5282	23.9626	22.6401	23.1662	17.333	17.2382	17.4572
ENSDARG00000005913	tgm1l3	ENSMUSG00000022218	Tgm1	ortholog_one2many	46.6413	45.1534	0	11.92	0	0.0101773	1.04	0.68	0.57	0.763333	0.91	1.37	1.18	1.15333	0.82	0.1	0.03	0.316667	0.06	0.08	0.02	0.0533333	0.0189634	0	0	0	0	0	0	0	0	0	0	0	0	0.311476	0.367007	0.346132	0.378965	0.644313	0.284706	0.388767	0	0	0
ENSDARG00000005915	tcf3a	ENSMUSG00000020167	Tcf3	ortholog_one2many	51.9939	51.9142	0	0.21	0	7.83828e-07	5.69	5.11	4.11	4.97	1.66	1.31	1.09	1.35333	0.82	0.49	1.5	0.936667	1.56	1.1	1.43	1.36333	4.45756e-09	5.91221	6.10601	5.08468	5.46226	5.64129	7.27443	6.88214	6.6487	7.18923	7.45296	6.84571	7.04886	10.6171	10.8802	10.4073	11.1278	11.2156	9.87939	10.6879	4.91864	4.45149	4.8852
ENSDARG00000005916	srpk3	ENSMUSG00000002007	Srpk3	ortholog_one2one	54.3662	68.3186	50	2.86	0	1.37119e-07	4.88	6.89	6.56	6.11	1.27	1.19	0.92	1.12667	0.03	0.22	0.51	0.253333	1.17	0.8	0.89	0.953333	7.38978e-07	0.194205	0.0322129	0.0352957	0.0704408	0.0830385	0	0	0	0	0	0	0	0	0	0	0	0	0	0	0	0	0
ENSDARG00000005924	serpina10a	ENSMUSG00000061947	Serpina10	ortholog_one2many	27.8772	24.3304	25	0	0	0.000279257	121.94	126.45	134.96	127.783	82.13	83.74	80.69	82.1867	13.88	16.07	17.46	15.8033	12.3	16.97	15.87	15.0467	1.17432e-05	0.103043	0.0256377	0	0.0280313	0.039178	0.321157	0.471825	0.135158	0.38355	0.374158	0.227467	0.318886	0	0	0	0	0	0	0	0.0567936	0.056483	0.0296881
ENSDARG00000005926	ak2	ENSMUSG00000028792	Ak2	ortholog_one2one	78.8382	79.4979	25	70.46	0	3.80785e-05	35.29	35.78	34.44	35.17	47.74	49.3	49.99	49.01	23.11	34.39	31.74	29.7467	68.44	52.59	63.15	61.3933	7.8865e-06	20.675	20.702	21.2598	21.3519	20.9972	38.7257	41.7279	41.1808	39.4078	42.0116	40.6205	40.6124	18.9447	17.2701	19.8371	18.8248	19.4586	21.4956	19.3051	16.7565	15.3261	15.9656
ENSDARG00000005941	yes1	ENSMUSG00000014932	Yes1	ortholog_one2one	84.6154	85.3974	0	77.79	1	0.000800608	0.64	0.47	0.65	0.586667	4.51	3.37	3	3.62667	6.79	9.91	12.3	9.66667	4.54	4.38	4.38	4.43333	0.00106113	3.67187	3.9201	3.33065	3.26906	3.54792	2.62497	3.37873	3.39767	3.44352	3.91595	3.03961	3.30007	4.0407	4.83601	4.58664	4.68028	4.04572	4.77528	4.49411	3.49566	2.98251	3.82774
ENSDARG00000005942	v2rl1	ENSMUSG00000090581	Vmn2r6	ortholog_one2many	40.9042	46.1165	50	83.12	0	0.550856	0	0	0	0	0	0	0	0	0	0	0	0	0	0	0	0	1	0	0	0	0	0	0	0	0	0	0	0	0	0	0	0	0	0	0	0	0	0	0
ENSDARG00000005943	htra4	ENSMUSG00000037406	Htra4	ortholog_one2one	58.8235	55.9006	25	68.86	0	0.0179216	0	0.03	0.01	0.0133333	0.26	0.22	0.19	0.223333	1.12	0.25	0.6	0.656667	0.00915	0.01	0.02	0.01305	0.224723	0	0	0	0	0	0	0	0	0	0	0	0	0	0	0	0	0	0	0	0	0	0
ENSDARG00000005945	sart1	ENSMUSG00000039148	Sart1	ortholog_one2one	67.9537	65.5087	0	42.03	0	7.39916e-07	42.03	40.08	41.28	41.13	27.55	28.43	27.19	27.7233	5.46	7.99	8.01	7.15333	10.76	10.84	11.47	11.0233	3.26409e-08	12.2307	11.9609	11.465	11.1131	11.6925	10.3373	10.6641	9.43524	9.61903	10.0855	9.65098	9.96537	11.2554	12.2255	11.5676	11.6763	12.4488	12.6499	11.9706	7.27771	8.42159	8.22063
ENSDARG00000005948	ankmy2a	ENSMUSG00000036188	Ankmy2	ortholog_one2many	60.1064	51.3636	75	40.92	1	0.0180368	1.1	1.58	2.27	1.65	2.41	2.87	2.26	2.51333	4.73	2.8	1.61	3.04667	1.43	1.46	1.76	1.55	0	16.5412	17.5988	16.0692	16.2755	16.6212	11.7294	12.4296	10.5149	11.5971	12.1422	12.4426	11.8093	17.3403	16.6506	17.2703	17.4436	19.5317	19.2876	17.9207	17.2186	16.1552	18.0866
ENSDARG00000005972	ric8b	ENSMUSG00000035620	Ric8b	ortholog_one2one	52.9851	50.7143	25	4.9	0	1.00481e-06	68.96	76.52	67.33	70.9367	16.1	15.17	17.03	16.1	4.74	5.25	6.39	5.46	8.3	5.53	6.28	6.70333	6.31275e-10	10.1037	10.1139	7.97509	9.36431	9.38926	14.2243	13.732	14.0849	14.7435	13.3886	13.8751	14.0081	5.92053	6.83221	6.34187	6.61601	6.348	6.79946	6.47635	9.29214	10.1751	11.3395
ENSDARG00000005980	sfswap	ENSMUSG00000029439	Sfswap	ortholog_one2one	56.3674	57.1429	25	51.46	0	0.000141719	29.63	30.78	26.5	28.97	10.32	12.18	10.35	10.95	3.2	2.62	2.76	2.86	7.53	7.19	5.93	6.88333	0.00207405	1.8809	1.92085	2.25215	1.87278	1.98167	2.18103	2.26348	2.54129	2.34025	2.5135	2.266	2.35093	1.7372	1.7183	1.98726	1.7943	1.83493	2.11621	1.8647	1.55841	1.50946	1.61512
ENSDARG00000005989	rgl1	ENSMUSG00000026482	Rgl1	ortholog_one2one	63.1841	66.1458	0	2.09	0	0.000286965	0	0	0	0	3.27	2.97	3.83	3.35667	3.36	5.64	5.97	4.99	0.88	1.06	0.81	0.916667	5.66198e-07	16.2929	16.4559	17.0985	15.7103	16.3894	6.74496	6.9822	6.99104	7.22262	7.42553	7.8877	7.20901	1.57558	1.36603	0.949949	1.35337	1.48321	1.53209	1.37671	4.00102	3.7846	3.66242
ENSDARG00000005993	prc1b	ENSMUSG00000038943	Prc1	ortholog_one2many	49.1639	48.5149	0	49.69	0	0.0472354	0	0.06	0.05	0.0366667	0.01	0	0	0.00333333	1.28	1.16	3.75	2.06333	0.06	0.21	0.05	0.106667	4.05183e-07	0	0.0109034	0.0358407	0.0119214	0.0146664	0.0315195	0.0633669	0.0804738	0.0466056	0.0489616	0.0483695	0.0532161	0.250438	0.234728	0.164452	0.201456	0.313971	0.22111	0.231026	0.797071	1.04494	0.820692
ENSDARG00000006003	mycla	ENSMUSG00000028654	Mycl	ortholog_one2many	43.8119	48.0978	0	0	0	5.06413e-05	2.18	2.49	2.61	2.42667	4.1	3.76	3.38	3.74667	8.5	13.38	12.63	11.5033	0.29	0.51	0.14	0.313333	0	4.30694	3.99765	3.52853	3.66669	3.87495	3.2743	2.71051	3.34859	3.53617	3.09162	3.00498	3.16103	12.5211	13.5694	14.7645	13.7722	13.4834	14.0147	13.6875	5.33805	6.26298	5.37505
ENSDARG00000006008	dct	ENSMUSG00000022129	Dct	ortholog_one2one	61.9883	61.5087	25	88.26	1	0.0823894	0.16	0.16	0.26	0.193333	0	0.04	0	0.0133333	0	0	0	0	0	0	0	0	0.000405627	0.239127	0.237985	0.521522	0.390306	0.347235	3.32516	4.18768	3.59658	3.43319	3.51769	4.44292	3.75054	9.73154	8.94549	12.471	10.0767	7.23364	6.57672	9.1725	12.1694	11.4037	12.5391
ENSDARG00000006010	bmi1a	ENSMUSG00000026739	Bmi1	ortholog_one2many	77.3006	77.7778	75	95.91	1	9.5091e-07	41.29	42.62	49.26	44.39	23.66	21.62	22.69	22.6567	2.07	4.17	2.74	2.99333	3.31	2.56	2.37	2.74667	3.37155e-06	24.7839	25.3426	23.4902	24.3283	24.4863	31.1393	30.2739	33.6921	33.4233	34.3022	33.9124	32.7905	8.50537	9.18427	8.48297	8.4433	7.63545	7.69898	8.32506	19.3965	19.6633	19.573
ENSDARG00000006011	klhl42	ENSMUSG00000040102	Klhl42	ortholog_one2one	60.8051	58.215	0	64.72	0	0.0541455	1.91	1.68	2.29	1.96	2.29	2.11	2.54	2.31333	2.2	2.55	6.73	3.82667	0.49	0.42	0.39	0.433333	1.28681e-12	3.22773	3.76856	3.91591	3.20814	3.53009	2.21098	2.08779	2.24332	2.55593	2.34169	1.88155	2.22021	1.94548	1.91027	2.54915	2.31241	2.76968	2.04036	2.25456	3.92769	3.64579	3.0757
ENSDARG00000006019	tktb	ENSMUSG00000031397	Tktl1	ortholog_one2many	56.2401	59.8319	0	17.82	0	0.00166067	79.25	80.03	78.07	79.1167	75.48	82.07	75.32	77.6233	15.62	20.3	49.66	28.5267	74.64	94.93	108.77	92.78	9.03797e-08	0	0	0	0	0	0	0	0	0	0	0	0	0	0	0	0	0	0	0	0	0	0
ENSDARG00000006025	tp53i11b	ENSMUSG00000068735	Trp53i11	ortholog_one2many	53.75	68.254	25	50.92	0	0.0134446	0.09	0.03	0	0.04	0.79	0.67	0.39	0.616667	0.8	1.61	0.02	0.81	1.51	2.33	2.14	1.99333	1.36589e-12	42.7356	42.5801	40.5037	42.1179	41.9843	17.2832	16.5492	16.5282	16.1539	16.2611	15.0133	16.2982	24.8157	25.2884	23.883	24.5852	24.2903	22.7292	24.2653	44.0668	45.4053	45.3672
ENSDARG00000006029	lta4h	ENSMUSG00000015889	Lta4h	ortholog_one2one	63.9935	63.9935	25	12.92	0	6.86393e-07	7.04	7.17	7.6	7.27	7.54	10.02	8.25	8.60333	358.11	321.15	386.23	355.163	6.69	6.99	5.32	6.33333	1.96119e-09	23.3346	24.265	25.0177	24.5371	24.2886	20.0354	20.476	18.2157	18.9253	19.5409	19.3046	19.4163	32.9472	33.0184	33.3898	32.582	33.4884	30.4468	32.6454	28.0303	27.0641	25.8366
ENSDARG00000006031	abat	ENSMUSG00000057880	Abat	ortholog_one2one	70.2	70.2	50	68.06	0	2.99906e-06	4.27	3.8	3.65	3.90667	5.37	4.55	4.76	4.89333	2.66	5.17	1.33	3.05333	110.55	86	105.13	100.56	0.000500034	1.75616	1.80565	1.19215	1.32881	1.52069	6.80353	6.35683	6.43152	6.86463	6.56195	6.90622	6.65411	2.9365	3.26306	3.14237	3.58212	3.48576	3.27231	3.28035	5.80761	6.20936	5.66962
ENSDARG00000006038	aebp2	ENSMUSG00000030232	Aebp2	ortholog_one2one	63.1325	51.9841	75	47.16	1	7.49195e-05	5.82	6.1	5.78	5.9	7.29	8	8.11	7.8	1.44	1.55	3.9	2.29667	1.2	1.14	1.51	1.28333	0.000171554	1.71177	1.53534	1.61314	1.77067	1.65773	1.42878	1.40566	1.34162	1.58448	1.79443	1.50449	1.50991	2.02016	1.84345	2.33033	2.58659	2.18279	2.17017	2.18891	1.16477	1.50593	1.26645
ENSDARG00000006040	cyp20a1	ENSMUSG00000049439	Cyp20a1	ortholog_one2one	62.419	62.5541	25	84.38	1	0.000273329	24.48	25.54	21.97	23.9967	33.23	35.77	34.92	34.64	17.21	16.04	26	19.75	9.09	9.83	8.79	9.23667	0.000232831	3.70535	3.80535	3.43879	4.20352	3.78825	4.34726	4.71186	5.17042	4.56945	4.5362	5.22099	4.75936	4.46441	4.54448	3.68672	4.03189	3.76554	3.79056	4.04727	2.25952	2.76574	2.27142
ENSDARG00000006044	ust	ENSMUSG00000047712	Ust	ortholog_one2many	65.1106	65.1106	50	69.06	0	0.00650353	2.81	3.05	3.2	3.02	5.06	3.96	5.29	4.77	7.1	11.48	17.64	12.0733	0.25	0.24	0.11	0.2	3.11041e-11	6.79408	6.36389	6.74356	6.79783	6.67484	1.4322	1.11522	1.39054	1.78959	1.52755	1.36978	1.43748	1.48619	1.37345	1.04436	1.30539	1.48189	1.22361	1.31915	5.63438	5.37296	5.38154
ENSDARG00000006060	aim1b	ENSMUSG00000019866	Crybg1	ortholog_one2many	15.5821	26.1975	0	0.3	0	0.000433319	15.71	16.87	16.71	16.43	2.89	3.15	2.92	2.98667	0.09	0.03	0	0.04	5.97	2.94	4	4.30333	0	3.57966	3.18575	3.24041	3.03374	3.25989	3.25683	3.42861	3.17838	2.64778	3.37129	3.24188	3.18746	6.56863	6.74239	6.59735	6.34234	7.63094	6.26559	6.6912	11.2435	11.3832	10.1416
ENSDARG00000006062	akap1b	ENSMUSG00000018428	Akap1	ortholog_one2one	37.9928	37.1062	50	15.14	0	0.00142547	11.85	12.27	11.92	12.0133	2.14	2.5	2.19	2.27667	1.3	1.48	6.09	2.95667	7.89	7.36	10.87	8.70667	0.000300619	1.35474	1.18485	1.18632	1.47415	1.30002	1.9291	1.91935	2.08929	1.8337	2.408	1.94842	2.02131	2.06881	2.15702	1.77757	1.86362	2.45103	2.5587	2.14613	0.226269	0.112516	0.520428
ENSDARG00000006065	znf385b	ENSMUSG00000027016	Zfp385b	ortholog_one2one	57.4144	62.6556	75	73.34	1	6.55661e-08	17.29	18.23	17.1	17.54	0.91	0.9	0.8	0.87	0.08	0.43	0.29	0.266667	0.00405	0.00624	0.04	0.0167633	7.73603e-14	0.0657504	0.0327182	0.0119498	0.0238486	0.0335668	0.136618	0.0211274	0.0459962	0.0349627	0.0734602	0.108858	0.0701704	0.21634	0.0670815	0.113879	0.113346	0.157023	0.117087	0.130793	0.0362393	0.0240274	0.0126291
ENSDARG00000006074	uck2a	ENSMUSG00000026558	Uck2	ortholog_one2many	83.5249	83.5249	50	25.77	0	5.63848e-05	13.76	13.03	12.42	13.07	8.14	6.16	7.03	7.11	13.98	18.51	14.46	15.65	4.16	3.12	2.02	3.1	1.16233e-06	2.6057	2.7738	3.36297	2.44057	2.79576	3.13147	3.25904	3.92833	3.82349	3.3903	3.25829	3.46515	2.60464	2.77623	2.76114	2.61555	2.67819	2.56481	2.66676	1.90883	2.02495	2.10967
ENSDARG00000006079	gpr37l1a	ENSMUSG00000026424	Gpr37l1	ortholog_one2many	46.7611	48.0249	50	0	0	0.0028991	0	0	0	0	0	0	0	0	0	0	0.11	0.0366667	0.46	0.26	0.49	0.403333	0	0.277998	0.395243	0.0866138	0.172858	0.233178	0.152342	0.344552	0.416733	0.29565	0.177483	0.306839	0.282267	0.495177	0.364662	0.641984	0.136925	0.23711	0.518625	0.39908	3.28334	3.57015	3.02073
ENSDARG00000006092	rad21a	ENSMUSG00000022314	Rad21	ortholog_one2many	77.0801	77.3228	25	100	1	2.63992e-05	36.92	36.54	39.45	37.6367	55.66	56.72	52.21	54.8633	14.8	16.13	25.22	18.7167	17.9	16.25	16.6	16.9167	0.104241	6.45079	7.56463	7.68875	7.94441	7.41214	9.39929	8.84562	8.89421	9.20036	10.4197	9.65897	9.40303	8.88496	9.48943	8.71873	9.33886	9.76285	9.94386	9.35645	9.28826	9.18264	8.64449
ENSDARG00000006093	cdk15	ENSMUSG00000026023	Cdk15	ortholog_one2one	61.4833	59.3533	100	3.32	1	1.58972e-05	12.47	9.56	9.7	10.5767	3.23	3.6	3.46	3.43	0.81	1.31	0.64	0.92	0	0	0	0	7.58221e-10	0.0359438	0.107316	0	0.117336	0.065149	0.517048	0.450439	0.377171	0.229356	0.401584	0.515747	0.415224	0.821642	0.586743	0.747049	0.743555	0.686719	0.298702	0.647402	0.43584	0.630483	0.414237
ENSDARG00000006094	igf2r	ENSMUSG00000023830	Igf2r	ortholog_one2one	49.451	48.973	50	33.3	0	4.48542e-05	0.69	1.22	0.83	0.913333	0.23	0.26	0.5	0.33	1.07	1.07	2.51	1.55	1	1.12	0.65	0.923333	0.00234409	0.859291	0.864689	0.92662	0.716857	0.841864	2.12423	2.31936	2.1941	2.38617	2.04811	2.07603	2.19133	2.98607	3.15607	2.92144	2.69929	3.40883	2.81104	2.99712	2.84167	2.9622	3.323
ENSDARG00000006110	chd	ENSMUSG00000006958	Chrd	ortholog_one2one	45.7447	45.3587	0	25.82	0	0.550856	0	0	0	0	0.01	0.03	0	0.0133333	0	0	0	0	0	0.02	0.01	0.01	1.51407e-05	0.571104	0.737354	0.706931	0.990949	0.751584	0.843732	0.818362	0.793642	0.705859	0.741542	0.494062	0.732867	0.40095	0.267711	0.106935	0.177391	0.221172	0.274867	0.241504	0.187162	0.236903	0.160096
ENSDARG00000006112	myof	ENSMUSG00000048612	Myof	ortholog_one2many	66.601	66.0156	0	6.53	0	0.228572	0	0	0	0	0.32	0.23	0.19	0.246667	0.04	0	0	0.0133333	0.59	0.01	0.04	0.213333	1.71343e-12	1.17883	1.34981	1.14726	1.3655	1.26035	0.206649	0.13441	0.0798059	0.148285	0.212429	0.19587	0.162908	0.276583	0.245712	0.175632	0.203946	0.166494	0.165531	0.20565	3.92633	4.00213	3.7835
ENSDARG00000006120	tbx2b	ENSMUSG00000000093	Tbx2	ortholog_one2many	67.7843	65.4008	100	90.95	1	1.3232e-07	117.16	118.24	107.2	114.2	57.98	67.27	60.29	61.8467	0.1	0.61	0.21	0.306667	1.82	1.25	3.06	2.04333	9.54763e-13	82.0094	77.5369	75.0389	77.61	78.0488	3.0267	2.97058	3.25968	2.45793	2.49888	2.27666	2.7484	18.0236	18.9905	17.8482	19.4498	20.7426	19.295	19.0583	52.1315	50.4024	51.9818
ENSDARG00000006124	kdm5c	ENSMUSG00000056673	Kdm5d	ortholog_one2many	57.9214	59.0439	25	56.84	0	2.93675e-05	17.14	18.61	18.5	18.0833	4.25	4.21	4.65	4.37	3.9	2.76	3.81	3.49	5.38	4.57	4.3	4.75	0.00218611	1.37697	1.34257	1.21953	1.42988	1.34224	1.0859	1.40149	1.0195	1.15219	1.08549	1.1418	1.14773	0	0	0.0161414	0	0.00834629	0.00829803	0.00546428	0.0616395	0.0842907	0.0805532
ENSDARG00000006125	csnk1db	ENSMUSG00000025162	Csnk1d	ortholog_one2many	92.0596	89.3976	50	27.4	0	1.11338e-05	32.09	32.01	32.56	32.22	21.35	25.06	20.92	22.4433	30.32	37.8	29.85	32.6567	16.73	14.9	12.52	14.7167	1.87356e-12	18.2303	17.7326	16.7686	17.1037	17.4588	16.7945	17.2278	17.341	18.72	18.2029	16.7747	17.5102	35.1811	35.7526	34.2681	32.5818	34.9455	35.6168	34.7243	22.9045	22.9366	24.0908
ENSDARG00000006128	cep170aa	ENSMUSG00000057335	Cep170	ortholog_one2many	45.4475	37.3257	50	4.54	0	7.01491e-06	0.99	0.87	0.89	0.916667	1.98	2.22	2.37	2.19	1.39	1.77	2.52	1.89333	0.61	0.54	0.61	0.586667	0	1.44321	1.43632	1.22922	1.18943	1.32455	0.818953	0.864374	0.824414	0.771965	1.04952	0.820035	0.85821	0.204083	0.252665	0.335255	0.314058	0.254929	0.253455	0.269074	0.508333	0.458742	0.560974
ENSDARG00000006137	star	ENSMUSG00000031574	Star	ortholog_one2one	56.8421	57.0423	50	78.73	1	0.201779	0.86	1.28	0.95	1.03	0	0	0	0	1.57	0.72	0	0.763333	0.21	0.26	0.13	0.2	0	0.766809	0.784951	0.621164	0.309919	0.620711	0.567282	0.612472	1.1265	0.931998	0.979112	0.749636	0.827833	0.15935	0.0670571	0.126486	0.251789	0.156966	0.104039	0.144281	0.169055	0.144112	0.075747
ENSDARG00000006169	lrrk2	ENSMUSG00000036273	Lrrk2	ortholog_one2one	45.4581	45.5481	50	3.12	0	0.000125463	0	0	0	0	0.37	0.23	0.32	0.306667	1.32	1.78	1.84	1.64667	2.1	1.87	1.41	1.79333	0.00170683	0	0	0	0	0	0.021907	0.0293613	0.0399513	0.0161962	0.0340298	0.00840458	0.024975	0.0395597	0.0388437	0.00879224	0.00875112	0.0636473	0.0451995	0.0341323	0.159482	0.15861	0.210612
ENSDARG00000006174	lrrc23	ENSMUSG00000030125	Lrrc23	ortholog_one2one	47.546	45.5882	0	7.3	0	3.60674e-07	18.85	16.97	16.85	17.5567	0.02	0.03	0	0.0166667	0.21	0	0	0.07	0.06	0.02	0	0.0266667	3.16167e-08	0	0	0	0	0	0	0	0	0.0552668	0	0	0.00921114	0.215986	0.530192	0.300021	0.238894	0.248213	0.246778	0.296681	0	0	0
ENSDARG00000006181	hif1aa	ENSMUSG00000021109	Hif1a	ortholog_one2many	52.3013	44.8565	50	3.05	0	2.11897e-08	10.9	10.88	11.24	11.0067	11.96	11.05	11.91	11.64	0.06	0.22	0	0.0933333	0.08	0.1	0.04	0.0733333	4.98519e-13	32.6759	33.4021	35.5655	34.3088	33.9881	11.9159	11.5212	11.2743	10.9551	12.892	11.7746	11.7222	14.9115	14.4078	15.2295	14.7542	14.9283	14.3702	14.7669	45.9259	45.1721	48.9127
ENSDARG00000006192	gatad2ab	ENSMUSG00000036180	Gatad2a	ortholog_one2one	52.5316	52.6984	50	24.81	0	0.00131657	30.87	30.98	27.22	29.69	11.73	12.85	10.51	11.6967	1.48	3.06	3.99	2.84333	2.57	2.32	2.03	2.30667	3.62883e-14	16.296	15.4195	14.627	16.0928	15.6088	14.8581	14.2565	15.3814	16.0244	16.1391	15.0039	15.2772	14.7711	15.9241	14.1642	14.3238	14.5501	16.3714	15.0175	13.7389	13.5561	13.722
ENSDARG00000006196	sav1	ENSMUSG00000021067	Sav1	ortholog_one2one	64.9874	66.8394	75	100	1	0.000189441	6.12	5.51	6.81	6.14667	14.25	15.22	14.92	14.7967	1.78	1.04	4.56	2.46	5.44	4.41	5	4.95	3.9429e-12	1.71368	1.35018	0.934358	0.815818	1.20351	0.787467	1.41105	1.16135	0.949214	1.11686	0.669896	1.01597	0.816108	1.01988	0.989357	1.18988	0.724725	0.635766	0.895953	1.25936	1.01763	0.781749
ENSDARG00000006200	eif4g1a	ENSMUSG00000045983	Eif4g1	ortholog_one2many	54.5265	32.75	50	61.01	0	0.000522754	6.48	7.27	6.28	6.67667	4.24	4.34	3.49	4.02333	2.56	7.53	18.22	9.43667	12.94	9.18	13.73	11.95	0.0248073	7.2817	7.34619	7.0159	7.16373	7.20188	6.86353	6.10594	6.80358	6.80257	6.32454	6.66093	6.59352	12.0746	12.0977	11.3305	11.4351	12.298	12.2417	11.9129	12.0402	12.0154	12.5734
ENSDARG00000006202	erbb3a	ENSMUSG00000018166	Erbb3	ortholog_one2many	48.8873	52.5019	25	13.53	0	0.000218245	0	0	0	0	0.35	0.32	0.28	0.316667	0.11	0	0	0.0366667	1.8	1.86	1.22	1.62667	0.000715177	2.3067	2.1317	2.12338	2.00475	2.14163	4.29494	4.20177	4.02369	4.04613	3.5478	3.78595	3.98338	9.30695	9.13851	9.5469	10.1392	10.2843	9.5313	9.65785	9.24633	9.26145	8.90727
ENSDARG00000006206	pou4f3	ENSMUSG00000024497	Pou4f3	ortholog_one2one	84.29	82.5444	50	100	1	0.00114434	343.32	360.57	322.35	342.08	1.2	1.43	1.35	1.32667	0	0	0	0	0	0	0	0	1.77671e-07	110.882	110.505	112.212	110.227	110.957	87.9539	91.2087	83.4984	82.5542	88.0499	86.9009	86.6943	2.49944	2.06465	1.58716	1.88691	1.50458	1.58654	1.85488	13.3846	13.4369	13.6852
ENSDARG00000006207	gpx1b	ENSMUSG00000063856	Gpx1	ortholog_one2many	67.5393	64.1791	25	5.33	0	1.63984e-07	1239.76	1240.19	1180.23	1220.06	36.53	42.57	39.09	39.3967	44.63	5.14	1.39	17.0533	14.15	3.77	0.34	6.08667	4.07644e-06	127.517	120.801	138.504	133.177	130	114.388	109.554	104.171	104.594	98.5172	105.212	106.073	263.072	266.286	277.007	271.267	263.581	264.452	267.611	201.722	203.567	200.239
ENSDARG00000006215	akr1b1	ENSMUSG00000029762	Akr1b8	ortholog_many2many	67.3016	67.0886	50	8.03	0	0.000963524	0	0	0	0	0	0	0	0	0	0	0	0	0	0	0	0	3.10727e-08	0.661255	0.837578	0.917736	1.70073	1.02932	0.288245	0.0579489	0.756958	0.255724	0.335815	0.398105	0.348799	0.249846	0.367986	0.347056	0.345433	0.143563	0.499564	0.325575	0	0	0
ENSDARG00000006219	gnl3	ENSMUSG00000042354	Gnl3	ortholog_one2one	40.82	42.5651	75	20.75	0	0.0133627	14.95	17.49	16.43	16.29	37.02	37.03	35.11	36.3867	5.73	16.06	16.09	12.6267	6.98	6.64	9.38	7.66667	5.26849e-10	7.17825	6.81059	5.68811	6.24877	6.48143	7.75587	7.9346	7.68305	8.19387	8.55462	8.71528	8.13955	5.56906	6.83533	7.23856	6.54473	6.1143	6.53345	6.47257	6.75225	5.61359	5.57024
ENSDARG00000006220	ugt1ab	ENSMUSG00000089675	Ugt1a8	ortholog_many2many	46.3551	46.7925	50	60.45	0	4.51528e-07	1.34	1.17	1.29	1.26667	4.19	5.8	4.93	4.97333	0.71	0.21	1.34	0.753333	111.53	99.06	94.32	101.637	5.90474e-05	0	0	0	0	0	0	0	0	0	0	0	0	0	0	0	0	0	0	0	0	0	0
ENSDARG00000006225	ddx39aa	ENSMUSG00000005481	Ddx39	ortholog_one2many	93.2084	93.2084	0	71.94	0	0.000258605	54.39	54.99	54.73	54.7033	84.42	94.56	89.45	89.4767	31.39	28.92	46.56	35.6233	11.51	10.47	10.66	10.88	2.40627e-07	8.19826	7.86337	8.25374	8.59752	8.22822	13.4779	13.0762	13.647	12.7901	12.5187	13.8144	13.2207	6.52048	6.884	6.23679	6.95092	6.84635	6.82751	6.71101	10.4824	10.5209	9.30714
ENSDARG00000006235	brms1la	ENSMUSG00000012076	Brms1l	ortholog_one2many	83.9009	83.9009	50	56.11	0	3.78985e-05	27.91	26.1	26.43	26.8133	19.19	14.24	16.2	16.5433	21.84	20.32	13.54	18.5667	2.8	3.4	2.76	2.98667	0	10.9917	12.9313	11.7181	10.0117	11.4132	5.1863	5.51795	5.01158	6.46105	5.76756	6.24046	5.69748	12.8075	13.758	12.4078	11.3812	13.2089	12.7156	12.7132	12.7359	11.7807	13.5983
ENSDARG00000006240	slc27a1a	ENSMUSG00000031808	Slc27a1	ortholog_one2many	65.3787	65.4799	50	25.19	0	2.41126e-08	11.31	12.37	13.22	12.3	8.83	7.15	7.68	7.88667	1.27	1.87	2.51	1.88333	7.17	7.67	6.9	7.24667	5.86179e-13	24.5025	24.225	27.6684	25.75	25.5365	49.9636	50.7207	52.0654	50.4707	49.9604	48.3955	50.2627	83.9151	84.0081	78.4729	79.588	81.6531	84.7788	82.0693	62.2646	60.5103	58.371
ENSDARG00000006242	ptp4a1	ENSMUSG00000026064	Ptp4a1	ortholog_one2one	89.5954	89.5954	25	48.34	0	6.41715e-06	81.88	85.46	90.92	86.0867	146.04	152.93	134.13	144.367	69.51	90.82	80.53	80.2867	10.06	8.99	9.19	9.41333	1.25542e-14	23.5793	23.4044	23.6494	23.4798	23.5282	17.874	17.8464	17.7366	18.2919	18.9545	19.2603	18.3273	49.4387	48.6716	49.1079	47.6024	53.2307	51.3822	49.9056	37.1956	37.8664	39.7341
ENSDARG00000006251	ell2	ENSMUSG00000001542	Ell2	ortholog_one2one	52.3664	53.6776	100	58.72	1	0.00197451	18.27	16.19	17.54	17.3333	6.54	6.27	6.32	6.37667	5.91	8.92	12.86	9.23	30.08	24.33	17.42	23.9433	0.000296998	12.4282	11.705	12.0438	10.9426	11.7799	9.33586	9.45588	9.33381	9.27583	9.71713	9.19056	9.38484	14.2229	13.0076	13.4374	14.1129	13.5127	14.4026	13.7827	8.38888	8.15339	9.02665
ENSDARG00000006253	mier3a	ENSMUSG00000032727	Mier3	ortholog_one2many	56.8519	55.7169	0	12.69	0	0.0534024	7.34	7.34	6.74	7.14	4.58	5.95	5.19	5.24	0.85	2.6	3.76	2.40333	3.17	2.02	2.62	2.60333	1.19632e-10	4.42385	4.40273	3.4962	3.5726	3.97384	4.47897	4.24966	3.57459	3.86872	4.78759	4.7297	4.28154	3.60361	3.42831	4.02236	4.00355	4.03087	3.86117	3.82498	3.82307	3.78527	3.87258
ENSDARG00000006257	vldlr	ENSMUSG00000024924	Vldlr	ortholog_one2one	71.4964	68.9576	50	89.37	1	5.57014e-05	0	0	0	0	0.77	0.5	0.79	0.686667	0.63	0.25	0.24	0.373333	5.82	6.66	4.28	5.58667	0	1.79005	1.67461	1.80559	1.64591	1.72904	3.48479	3.54606	3.45619	3.66464	3.5499	3.65516	3.55946	39.1705	39.4752	35.1682	35.6517	37.8546	37.9014	37.5369	5.56449	6.11297	5.71438
ENSDARG00000006266	stat1a	ENSMUSG00000026104	Stat1	ortholog_one2many	61.0147	60.5298	0	25.56	0	1.87582e-07	63.22	67.09	63.51	64.6067	41.65	43.56	40.36	41.8567	19.3	19.66	17.69	18.8833	16.86	13.8	12.22	14.2933	0	3.48776	3.3575	3.23626	3.46396	3.38637	3.69746	3.88786	4.28533	4.7478	4.15178	4.10158	4.1453	18.9895	18.4	19.1107	18.7007	20.5508	20.4772	19.3715	10.1219	9.67727	10.553
ENSDARG00000006272	mpp5a	ENSMUSG00000021112	Mpp5	ortholog_one2many	73.1152	76.1481	75	91.49	1	0.00613199	5.94	5.07	5.05	5.35333	1.13	1.58	1.37	1.36	1.83	2.82	2.15	2.26667	2.56	2.38	2.31	2.41667	0	20.8766	21.7694	20.109	20.7955	20.8876	10.5355	11.8825	11.0819	11.1619	11.4522	11.2596	11.229	9.35958	9.42369	8.64544	8.7741	9.62391	8.90838	9.12252	12.0381	12.1335	12.3217
ENSDARG00000006279	rragd	ENSMUSG00000028278	Rragd	ortholog_one2one	79.1878	78.1955	50	37.38	0	4.85634e-06	23.11	20.27	23.09	22.1567	1.39	1.84	1.92	1.71667	0.07	0.22	0.12	0.136667	0.38	0.6	0.63	0.536667	2.03458e-07	4.26777	4.31674	3.40018	4.24589	4.05765	0.384219	0.352634	0.530088	0.444613	0.525476	0.442215	0.446541	1.08598	0.995239	1.0459	0.820798	0.665612	1.07537	0.94815	1.68978	2.19615	2.00752
ENSDARG00000006283	waslb	ENSMUSG00000029684	Wasl	ortholog_one2many	64.6718	66.8663	50	27.12	0	4.00923e-07	11.36	10.95	11.53	11.28	4.36	4.22	5.06	4.54667	0.86	1.89	1.87	1.54	3.51	2.65	2.55	2.90333	4.84241e-14	9.31678	9.54553	7.90418	7.82756	8.64851	20.5552	19.6563	19.7833	20.4007	20.6549	21.193	20.3739	10.042	10.4204	11.3283	10.497	10.6661	10.1698	10.5206	8.37351	7.92638	8.3535
ENSDARG00000006288	prdm5	ENSMUSG00000029913	Prdm5	ortholog_one2one	73.3438	77.6294	25	54.78	0	0.130925	0	0	0	0	0.54	1.16	0.64	0.78	0	0	0	0	0.06	0.08	0.01	0.05	0	0.606563	0.772693	0.714354	0.792032	0.72141	0.558423	0.654882	0.509191	0.464456	0.623472	0.696272	0.584449	0.705879	0.866379	0.868462	0.808633	0.608403	0.691297	0.758175	1.06981	1.30335	0.950692
ENSDARG00000006290	ndufs5	ENSMUSG00000028648	Ndufs5	ortholog_one2one	61.3208	61.3208	25	100	1	1.27319e-06	194.94	205.57	195.31	198.607	164.35	169.72	179.08	171.05	25.43	31.95	28.8	28.7267	53.24	47.28	52.3	50.94	0	290.032	286.352	297.189	295.985	292.39	174.038	178.377	164.485	167.039	163.659	157.285	167.48	176.481	172.004	195.149	196.645	178.667	170.792	181.623	176.719	179.313	175.94
ENSDARG00000006292	maats1	ENSMUSG00000022805	Maats1	ortholog_one2one	48.4076	48.5313	50	23.36	0	0.00155352	8.76	7.39	7.45	7.86667	0.02	0.04	0.07	0.0433333	0	0	0	0	0.04	0.15	0.06	0.0833333	6.39844e-12	0	0.0197796	0	0	0.0049449	0.343072	0.344856	0.25026	0.317047	0.288664	0.219364	0.293877	0.144554	0.121661	0.0688447	0.0913637	0.118659	0.212352	0.126239	0	0	0
ENSDARG00000006299	arhgef7a	ENSMUSG00000031511	Arhgef7	ortholog_one2many	68.8009	75.5754	25	65.54	0	7.18733e-12	35.78	40.8	39.75	38.7767	1.37	2.28	1.52	1.72333	0.04	0.16	0.03	0.0766667	0.05	0.01	0.00398	0.0213267	0.00204501	0.360421	0.415636	0.517799	0.379739	0.418399	0.389533	0.452223	0.510274	0.438064	0.472993	0.555677	0.469794	0.600382	0.513637	0.594518	0.723235	0.567001	0.6656	0.610729	1.05317	0.934514	0.890079
ENSDARG00000006300	psmd9	ENSMUSG00000029440	Psmd9	ortholog_one2one	52.1327	49.5495	0	57.02	0	5.63228e-05	49.06	49	46.59	48.2167	15.55	18.76	16.08	16.7967	6.54	11.46	8.68	8.89333	2.66	3.92	2.93	3.17	5.16951e-05	6.63543	5.97127	7.11344	7.22029	6.73511	4.3199	4.54057	4.3542	4.49247	4.67781	4.91007	4.54917	5.98174	6.67441	6.58254	6.6162	6.00384	6.10226	6.32683	6.77872	6.31133	7.38856
ENSDARG00000006301	raph1a	ENSMUSG00000026014	Raph1	ortholog_one2many	48.3067	59.7156	50	60.14	0	1.26355e-06	1.81	1.82	1.44	1.69	2.92	3.53	3.11	3.18667	2.08	2.7	2.25	2.34333	0.55	0.57	0.62	0.58	0.0703744	0.512998	0.510548	0.614432	0.649725	0.571926	0.83069	0.883652	0.847172	0.599234	0.808049	0.668325	0.772854	0.524292	0.592023	0.66031	0.715212	0.632648	0.57907	0.617259	1.82626	1.67798	1.82208
ENSDARG00000006307	shisa4	ENSMUSG00000041889	Shisa4	ortholog_one2many	23.3766	27.4112	75	28.58	0	3.62239e-07	3.84	2.93	3.65	3.47333	1.04	0.89	1.15	1.02667	0.91	0.61	0.91	0.81	0.12	0.08	0.08	0.0933333	0.000225916	0.559001	0.556332	0.528298	0.608273	0.562976	1.03642	1.18551	1.25137	1.78349	1.37401	1.15173	1.29709	3.5237	3.45993	3.74364	2.74106	3.20398	3.58364	3.37599	2.46481	2.61476	2.491
ENSDARG00000006308	ptpn18	ENSMUSG00000026126	Ptpn18	ortholog_one2one	31.7121	35.9823	0	5.29	0	2.59371e-06	1.79	1.37	2.12	1.76	0.34	0.38	0.14	0.286667	14.14	18.84	14.59	15.8567	0.2	0.3	0.06	0.186667	2.04504e-06	0.0168463	0	0.0551112	0	0.0179894	0.355422	0.38975	0.229807	0.304572	0.263504	0.167347	0.285067	0.122529	0.120312	0.175066	0.193608	0.140812	0.0799986	0.138721	0.129991	0.203155	0.0776587
ENSDARG00000006314	itgav	ENSMUSG00000027087	Itgav	ortholog_one2one	59.1388	59.1954	50	8.66	0	2.28355e-06	1.76	2.9	3.32	2.66	1.32	1.72	1.86	1.63333	33.9	28.02	25.71	29.21	4.11	3.21	2.92	3.41333	0	3.97548	3.70609	4.21625	4.04298	3.9852	3.5953	3.35528	3.59076	3.37163	3.52333	3.61958	3.50931	5.61221	5.36517	5.20043	5.10864	5.69849	5.85472	5.47328	6.89703	6.53749	6.20543
ENSDARG00000006316	rpl23a	ENSMUSG00000078126	Rpl23a-ps3	ortholog_one2many	94.1936	93.5897	25	97.82	1	0.00247991	72.48	80.99	81.08	78.1833	456.8	557.87	488.66	501.11	262.31	217.3	68.45	182.687	403.31	362.17	400.56	388.68	1	0	0.174476	0.191174	0.953829	0.32987	0	1.01399	0	0	0.19587	0	0.201644	0.728637	0.178862	0	0	0.209339	0.208129	0.220828	0.193253	0.192196	0
ENSDARG00000006332	snx14	ENSMUSG00000032422	Snx14	ortholog_one2one	72.0557	69.8133	25	28.04	0	8.66569e-06	63.21	63.08	61.52	62.6033	11.41	11.89	11.24	11.5133	2.79	6.48	8.12	5.79667	4.46	4.69	4.85	4.66667	1.73504e-07	33.0894	32.795	33.2193	32.9247	33.0071	17.0598	16.4661	16.7259	17.8988	18.1403	19.3828	17.6123	14.64	12.9306	12.3665	13.4109	15.2429	12.5522	13.5239	17.2434	16.373	18.1065
ENSDARG00000006341	tas1r3	ENSMUSG00000029072	Tas1r3	ortholog_one2one	33.96	33.683	0	20.87	0	0.398937	0	0	0	0	0	0.01	0	0.00333333	0	0	0	0	0.04	0.07	0.66	0.256667	9.6086e-09	0.0767337	0.101823	0.13946	0.0278324	0.0864622	0.122645	0.123283	0.134199	0.217616	0.0285771	0.112926	0.123208	0.212614	0.18267	0.324871	0.235165	0.244338	0.212559	0.23537	0	0	0
ENSDARG00000006345	med17	ENSMUSG00000031935	Med17	ortholog_one2one	77.4112	46.9954	25	98.67	1	0.0522617	2.35	4.53	3.92	3.6	7.52	8.17	7.2	7.63	1.89	0.48	2.71	1.69333	3.16	2.59	4.02	3.25667	6.41965e-07	5.29249	5.08321	5.09084	6.08591	5.38811	6.44961	5.2801	5.67486	5.50565	5.31919	6.24972	5.74652	4.46657	4.55078	3.68262	3.47947	4.58109	4.49972	4.21004	6.42002	5.16874	6.20591
ENSDARG00000006350	nkx1.2la	ENSMUSG00000048528	Nkx1-2	ortholog_one2one	43.3333	38.3607	0	19.16	0	0.0823894	0	0	0	0	0.9	0.87	1.12	0.963333	0.03	0.09	0.05	0.0566667	0	0	0.00591	0.00197	0.00541794	0	0	0	0	0	0	0	0	0	0	0	0	0	0	0	0	0	0	0	0	0	0
ENSDARG00000006353	itga5	ENSMUSG00000000555	Itga5	ortholog_one2one	54.226	54.226	0	6.78	0	0.0328114	0.04	0.13	0.07	0.08	1.57	2.35	1.94	1.95333	1.78	1.54	4.65	2.65667	0.26	0.38	0.25	0.296667	3.64772e-06	0.0823119	0.122878	0.201957	0.179134	0.14657	0	0	0	0	0	0	0	0.427631	0.440886	0.237605	0.212845	0.589726	0.513026	0.40362	0	0	0.0237153
ENSDARG00000006356	slc18a3a	ENSMUSG00000100241	Slc18a3	ortholog_one2one	67.6413	65.4717	0	85.7	1	1	0	0	0	0	0	0	0	0	0	0	0	0	0	0	0	0	1	0	0	0	0	0	0	0	0	0	0	0	0	0	0	0	0	0	0	0	0	0	0
ENSDARG00000006368	crlf1b	ENSMUSG00000007888	Crlf1	ortholog_one2many	59.8558	58.5882	50	80.33	1	0.00326632	0.15	0.27	0.17	0.196667	1.15	0.81	1	0.986667	0.09	1.1	0.42	0.536667	0.21	0.18	0.2	0.196667	0.000120235	1.97323	1.58196	2.68969	2.38573	2.15765	0.525644	0.686892	1.03529	1.28243	0.73487	0.362992	0.771354	0.22781	0.0559217	0.253157	0.0629932	0.196351	0.455503	0.208623	0.66463	0.540814	0.694854
ENSDARG00000006370	atp6v1h	ENSMUSG00000033793	Atp6v1h	ortholog_one2one	87.7339	87.3706	75	87.89	1	6.00909e-05	229.93	229.18	225.36	228.157	48.9	54.53	53.58	52.3367	18.1	30.08	37.88	28.6867	7.61	8.41	7.6	7.87333	1.74169e-08	14.0631	14.6216	14.3775	13.8438	14.2265	9.28355	9.7864	10.2066	9.35121	9.73096	10.1338	9.74875	12.2681	12.4329	12.7364	12.9743	12.4426	12.689	12.5905	10.5488	10.6127	10.1867
ENSDARG00000006383	stxbp5l	ENSMUSG00000022829	Stxbp5l	ortholog_one2one	72.8214	71.2236	25	1.27	0	1.27506e-06	1.18	1.12	0.98	1.09333	0	0.09	0	0.03	0	0.26	0.04	0.1	0.02	0.02	0.05	0.03	0	0.137477	0.126296	0.0807233	0.149595	0.123523	0.0405661	0.0203886	0.0110969	0	0.0236304	0	0.015947	0.0109881	0.0107893	0.0488428	0.0243072	0.037883	0.0502186	0.0305048	0	0	0
ENSDARG00000006385	triobpb	ENSMUSG00000033088	Triobp	ortholog_one2many	40.3071	10.427	25	6.97	0	5.24008e-05	10.27	12.16	10.81	11.08	2.54	1.46	1.72	1.90667	0.49	0.43	0.22	0.38	3.1	2.96	3.25	3.10333	6.58051e-15	26.7355	26.4567	25.5939	25.6678	26.1135	60.2347	58.8971	60.1813	59.9436	57.9971	57.7055	59.1599	5.3122	5.48289	4.97783	5.04181	5.17803	5.35842	5.2252	10.0067	10.2757	10.102
ENSDARG00000006389	smad2	ENSMUSG00000024563	Smad2	ortholog_one2one	94.6695	95.0749	50	51.07	0	8.10045e-05	17.06	15.28	14.87	15.7367	9.65	10	9.14	9.59667	4.76	6.08	7.29	6.04333	3.05	3.11	3.33	3.16333	0	6.04295	6.62055	6.9219	6.2993	6.47117	5.50296	5.80082	5.1155	6.29164	5.87213	5.40878	5.6653	14.3782	13.5999	11.9029	13.0144	14.0678	14.6797	13.6071	9.40421	10.4662	9.97818
ENSDARG00000006392	exosc9	ENSMUSG00000027714	Exosc9	ortholog_one2one	71.2468	63.9269	0	86.46	1	0.000987848	8.23	7.35	7.1	7.56	15.99	17.22	17.18	16.7967	7.08	11.87	13.88	10.9433	0.96	1.26	1.53	1.25	2.6466e-08	13.8735	14.0929	13.7306	14.2427	13.9849	11.6897	11.1971	10.6826	11.5797	11.2671	11.0886	11.2508	6.06436	6.32555	6.20881	7.03747	6.23803	6.42914	6.38389	9.5978	9.23063	8.62285
ENSDARG00000006395	rbm25b	ENSMUSG00000010608	Rbm25	ortholog_one2many	75.1807	74.463	0	37.63	0	0.00113702	35.24	33.73	33.72	34.23	15.71	18.97	15.57	16.75	2.84	5.26	10.17	6.09	5.92	5.39	6.14	5.81667	1.25808e-07	8.24923	8.78504	8.26214	8.38172	8.41953	11.7909	11.062	10.5418	10.7847	11.095	11.448	11.1204	9.22649	9.54197	9.63424	9.22687	9.13505	9.5064	9.3785	9.40613	9.72335	9.95498
ENSDARG00000006396	nrcama	ENSMUSG00000020598	Nrcam	ortholog_one2one	60.7004	62.1019	25	75.5	1	1.07276e-05	2.49	1.54	1.44	1.82333	0.04	0.01	0.02	0.0233333	0.06	0.02	0.24	0.106667	0.28	0.56	0.45	0.43	0	16.3676	16.7508	16.4874	16.5039	16.5274	13.1773	13.7041	13.1339	11.8827	13.8645	13.9855	13.2913	3.53227	3.6745	3.52726	3.21023	3.64771	3.37261	3.4941	31.63	32.4735	32.4657
ENSDARG00000006397	laptm4a	ENSMUSG00000020585	Laptm4a	ortholog_one2one	73.1092	56.4935	50	44.58	0	5.93745e-08	526.53	501.37	512.23	513.377	198.97	205.41	213.88	206.087	65.5	90.06	83.39	79.65	34.39	36.01	32.49	34.2967	6.95677e-12	113.033	110.217	111.675	116.967	112.973	153.336	160.65	159.301	156.532	152.293	164.869	157.83	219.156	219.182	224.702	226.222	232.558	231.454	225.546	196.871	201.311	195.925
ENSDARG00000006399	ywhae1	ENSMUSG00000020849	Ywhae	ortholog_one2one	96.4706	96.4706	25	99.51	1	4.85437e-07	34.73	33.7	36.08	34.8367	21.18	24.23	20.43	21.9467	37.86	45.61	45.66	43.0433	18.46	17.01	14.49	16.6533	3.43747e-15	181.169	184.32	188.262	188.585	185.584	118.721	117.985	119.521	118.97	121.848	126.068	120.519	194.151	194.288	201.693	201.072	206.988	202.542	200.122	193.519	191.115	187.842
ENSDARG00000006408	hmgb3b	ENSMUSG00000015217	Hmgb3	ortholog_one2many	63.6364	63	25	1.06	0	0.00079481	118.79	118.37	120.83	119.33	61.86	64.67	59.23	61.92	29.36	44.37	57.32	43.6833	29.2	35.02	39.92	34.7133	1.13989e-09	12.0605	11.2402	10.8644	10.8851	11.2625	6.15046	6.80459	7.1108	7.67863	6.75989	7.03431	6.92311	18.3571	17.7368	15.323	17.1056	19.9403	18.0532	17.7527	12.0052	12.7797	13.4809
ENSDARG00000006409	mapk12b	ENSMUSG00000022610	Mapk12	ortholog_one2many	69.9725	69.2098	25	62.62	0	5.01417e-05	0	0	0	0	0	0	0	0	1.97	1.05	1.46	1.49333	2.58	2.87	2.9	2.78333	3.39159e-13	3.00529	3.03841	3.58929	3.99689	3.40747	2.2416	2.34523	1.70192	1.36976	1.75879	2.10608	1.92056	6.49312	7.64099	7.43589	7.45593	7.23411	6.00301	7.04384	7.15148	7.37386	8.35631
ENSDARG00000006413	rpl38	ENSMUSG00000057322	Rpl38	ortholog_one2one	98.5714	98.5714	100	98.6	1	0.00296887	94.97	87.9	95.55	92.8067	421.68	543.11	454.54	473.11	290.6	179.23	133.36	201.063	203.29	202.75	211.72	205.92	0.281761	86.6196	85.0477	100.076	98.2345	92.4945	67.6021	72.6016	56.3502	57.8179	58.1402	55.2351	61.2912	105.895	98.7201	126.316	122.477	98.4682	93.1618	107.506	96.7662	92.2271	98.2926
ENSDARG00000006422	esyt3	ENSMUSG00000037681	Esyt3	ortholog_one2one	37.9791	36.7003	0	2.64	0	0.0125553	0	0	0	0	5.02	6.34	5.26	5.54	0	0	0	0	0.86	0.00537	0.07	0.31179	2.05225e-07	0.465389	0.289479	0.317183	0.274305	0.336589	0.204557	0.0747712	0.0813916	0.0824899	0.194985	0.0642091	0.117067	0.161188	0.0989189	0.134341	0.178284	0.231548	0.299272	0.183925	0.149629	0.106293	0.111738
ENSDARG00000006427	fabp2	ENSMUSG00000023057	Fabp2	ortholog_one2one	65.9091	65.9091	50	100	1	0.544935	0	0	0	0	2.55	2.21	3.15	2.63667	0.47	0.67	0.66	0.6	39.19	1.8	0.21	13.7333	1.56119e-06	0	0	0	0	0	0	0	0	0	0	0	0	0	0	0	0	0	0	0	0	0	0
ENSDARG00000006434	polr1e	ENSMUSG00000028318	Polr1e	ortholog_one2one	42.3729	36.3071	25	40.27	0	0.000217471	16.07	15.14	14.8	15.3367	13.65	15.68	12.59	13.9733	6.99	6.22	8.39	7.2	1.96	2.18	2.31	2.15	0.000116773	2.01172	2.39332	2.59716	2.71742	2.4299	1.57442	1.64949	2.01391	1.35253	1.47257	0.969842	1.50546	1.41754	1.43907	1.68206	1.249	1.43578	1.45492	1.44639	1.86072	2.05335	1.94534
ENSDARG00000006447	slc19a3a	ENSMUSG00000038496	Slc19a3	ortholog_one2one	41.517	42.623	25	5.04	0	0.0324529	0.2	0.16	0.18	0.18	0	0	0	0	0.04	0.19	0.19	0.14	0.34	0.22	0.18	0.246667	0.567994	0	0	0	0	0	0	0	0	0	0	0	0	0	0	0	0	0	0	0	0	0	0
ENSDARG00000006456	pdgfrl	ENSMUSG00000031595	Pdgfrl	ortholog_one2one	57.4124	56.8	75	35.71	1	0.21367	3.05	4.89	5.18	4.37333	460.93	478.52	461.43	466.96	0.26	0.35	0.06	0.223333	0.52	0.39	0.43	0.446667	0	3.77624	3.61477	4.11788	3.57585	3.77119	2.15625	2.02853	2.29888	1.59415	1.90018	2.29082	2.0448	6.31986	6.61722	6.62361	6.49325	7.29727	7.69996	6.84186	8.48421	9.48069	8.63748
ENSDARG00000006468	grap2a	ENSMUSG00000042351	Grap2	ortholog_one2many	51.0563	45.0311	50	30.05	0	0.00228165	0.54	2.26	1.36	1.38667	2.73	3.02	2.69	2.81333	9.51	10.39	18.34	12.7467	0.74	1.67	0.29	0.9	6.12199e-08	0	0	0	0	0	0	0	0	0	0	0	0	0.148242	0.145559	0.0988417	0.0655863	0.272578	0.169376	0.150031	0	0	0
ENSDARG00000006474	saxo2	ENSMUSG00000038570	Saxo2	ortholog_one2one	41.5054	48.9848	100	47.23	0	6.25877e-11	71.13	71.46	68.7	70.43	0.31	0.21	0.07	0.196667	0	0.45	0	0.15	0.22	0.07	0.06	0.116667	1.49161e-08	0.527405	0.712346	0.7189	0.758358	0.679252	0.758668	0.780772	0.830139	0.861372	0.589248	0.769234	0.764906	0.704572	0.730255	0.804714	0.974129	0.607276	0.872105	0.782175	0.664428	0.371697	0.369029
ENSDARG00000006477	ddi2	ENSMUSG00000047619	Ddi1	ortholog_one2one	62.3472	62.5	0	33.19	0	0.000236553	6.95	6.6	8.21	7.25333	4.41	4.48	4.39	4.42667	4.76	6.53	7.61	6.3	5.87	5.16	5.95	5.66	0.929931	0	0	0	0	0	0	0.0571483	0	0	0	0	0.00952472	0	0	0	0	0	0	0	0	0	0
ENSDARG00000006487	anp32a	ENSMUSG00000032249	Anp32a	ortholog_one2one	79.5276	81.7814	100	47.71	1	2.51355e-08	249.23	236.53	248.98	244.913	110.09	114.38	106.97	110.48	47.62	40.41	40.25	42.76	20.92	19.78	17.37	19.3567	4.09244e-07	1.93542	2.54936	1.70704	2.04407	2.05897	1.85606	1.72853	2.21011	1.99778	1.90797	1.50792	1.86806	3.34181	3.25229	3.51645	3.95794	3.29666	3.00728	3.39541	4.39244	4.27481	3.77216
ENSDARG00000006491	agpat9l	ENSMUSG00000029314	Gpat3	ortholog_one2many	69.3333	71.2329	0	0	0	0.221183	1.19	0.77	1.25	1.07	1.85	1.98	1.59	1.80667	0.07	0.12	0.16	0.116667	2.97	1.29	0.06	1.44	1.47353e-12	0.385969	0.307301	0.196414	0.167996	0.26442	0.271438	0.446482	0.35101	0.629398	0.143742	0.482815	0.387481	1.17639	1.39137	1.33699	1.12373	1.25974	1.31355	1.26696	0	0	0
ENSDARG00000006494	asb7	ENSMUSG00000030509	Asb7	ortholog_one2one	84.4828	92.4528	100	40.78	1	0.00267033	0.97	0.9	0.67	0.846667	0.72	0.63	0.62	0.656667	1.05	0.96	0.1	0.703333	0.79	0.65	0.83	0.756667	8.23347e-05	1.26389	0.995223	1.18134	1.08814	1.13215	0.599371	0.696209	0.947316	0.768079	0.698285	0.79715	0.751068	1.25552	1.34615	1.01032	0.92579	1.21067	1.05527	1.13395	2.52617	1.94898	2.24089
ENSDARG00000006497	rtn1a	ENSMUSG00000021087	Rtn1	ortholog_one2many	32.3961	33.9744	50	0	0	8.54199e-10	98.11	98.94	92.97	96.6733	34.19	30.68	31.52	32.13	5.39	2.96	1.14	3.16333	1.05	0.87	0.67	0.863333	0	8.41906	8.53568	8.78798	8.8672	8.65248	9.97356	10.7632	11.1257	11.8983	10.5129	10.8578	10.8553	13.9872	13.6881	12.7103	12.1593	13.8163	12.8278	13.1981	76.6764	77.1455	76.7389
ENSDARG00000006508	pip5k1bb	ENSMUSG00000024867	Pip5k1b	ortholog_one2one	73.814	72.1707	0	1.11	0	0.000340184	11.14	10.71	9.9	10.5833	8.21	10.15	8.13	8.83	1.28	1.19	0.79	1.08667	0.68	0.32	0.18	0.393333	6.99034e-05	1.09428	1.08906	1.19328	0.753324	1.03249	0.749581	0.796536	0.538985	0.475007	0.773481	0.788777	0.687061	2.27403	2.11895	2.29497	1.6426	2.34667	2.20054	2.1463	2.16635	1.88519	1.85307
ENSDARG00000006514	her6	ENSMUSG00000022528	Hes1	ortholog_one2one	79.2593	75.8865	50	54.1	0	3.28627e-05	4.27	4.58	3	3.95	3.04	3.57	2.52	3.04333	6.21	3.8	2.81	4.27333	2.77	3.01	1.87	2.55	0	27.9136	30.4659	30.439	30.7109	29.8824	10.4785	10.5757	9.74812	9.69147	10.1814	10.7419	10.2362	24.0395	23.6044	22.3214	23.8439	22.2913	22.2149	23.0526	32.1841	30.2137	34.0556
ENSDARG00000006522	otop2	ENSMUSG00000050201	Otop2	ortholog_one2one	41.4336	42.0959	25	66.65	0	0.290685	0.05	0.06	0.05	0.0533333	0.1	0.31	0.12	0.176667	0	0	0.03	0.01	0.44	0.00717	0	0.149057	1	0	0	0	0	0	0	0	0	0	0	0	0	0	0	0	0	0	0	0	0	0	0
ENSDARG00000006524	supt6h	ENSMUSG00000002052	Supt6	ortholog_one2one	80.7648	80.7648	25	99.64	1	4.42092e-06	3.86	3.45	3.3	3.53667	2.1	2.5	2.37	2.32333	2.71	3.42	4.08	3.40333	5.85	5.34	6.3	5.83	0.00149405	4.87704	5.49839	4.88893	5.51422	5.19465	4.42128	3.89334	3.94486	4.09264	4.05831	4.17745	4.09798	6.25518	6.45296	5.95394	5.95529	5.89944	5.83517	6.05866	7.32215	7.08717	7.21601
ENSDARG00000006526	fn1b	ENSMUSG00000026193	Fn1	ortholog_one2many	55.4	55.9144	25	77.31	1	2.38224e-05	0.04	0.06	0.07	0.0566667	16.09	16.39	19.97	17.4833	0.07	0.01	0.37	0.15	705.75	476.43	606.65	596.277	1.01692e-10	0.023135	0	0.00840936	0	0.0078861	0.0221864	0.0446036	0.0647372	0.0574094	0.0689275	0.0766058	0.055745	0.3125	0.275373	0.178087	0.221568	0.267044	0.192259	0.241138	0.94359	0.879249	1.02205
ENSDARG00000006527	brd3a	ENSMUSG00000026918	Brd3	ortholog_one2many	77.1084	68.9098	50	88.22	1	9.39566e-07	35.83	34.01	35.96	35.2667	34.66	36.66	34.22	35.18	2.57	5.5	4.89	4.32	3.71	2.59	2.85	3.05	1.7725e-11	8.67208	8.43507	7.31349	8.22014	8.16019	10.2955	9.93459	10.1569	9.74525	9.33213	10.2361	9.95007	5.92206	5.42638	6.45332	6.23962	6.48301	5.84763	6.062	8.84185	8.87429	8.80509
ENSDARG00000006544	CABZ01084570.1	ENSMUSG00000022440	C1qtnf6	ortholog_one2many	52.9644	50.7576	0	0	0	0.0836862	0	0	0	0	1.48	1.57	2.09	1.71333	0	0.12	0	0.04	0.17	0.34	0.07	0.193333	0.00380753	0	0	0	0.0408216	0.0102054	0.10793	0.108491	0	0.0797941	0	0	0.0493692	0.428779	0.535842	0.173268	0.388029	0.447961	0.133611	0.351249	0.372185	0.370149	0.345876
ENSDARG00000006545	rgp1	ENSMUSG00000028468	Rgp1	ortholog_one2one	65.8031	64.9616	50	51.39	0	6.8485e-06	46.18	48.85	50.18	48.4033	4.27	3.33	5.15	4.25	4.7	2.75	1.89	3.11333	2.62	3.17	2.2	2.66333	0.201264	0.581455	0.752282	0.570653	0.664341	0.642183	0.46003	0.44841	0.47286	0.571997	0.389781	0.449246	0.465387	0.407808	0.385597	0.469967	0.501181	0.520731	0.552234	0.47292	0.673003	0.669322	0.670103
ENSDARG00000006546	ak4	ENSMUSG00000028527	Ak4	ortholog_one2one	63.7168	64.574	100	19.21	1	0.00650047	114.6	109.82	125.12	116.513	45.87	37.86	44.85	42.86	60	25.56	26.13	37.23	20.85	29.02	25.99	25.2867	0.000226944	0.174559	0.250936	0.0846004	0.0844198	0.148629	0.204601	0.224362	0.386693	0.371285	0.303375	0.256891	0.291201	0.463514	0.356185	0.291135	0.289774	0.393716	0.322362	0.352781	0.705544	0.53158	0.737628
ENSDARG00000006553	rras	ENSMUSG00000038387	Rras	ortholog_one2one	71.4286	64.2202	25	55.78	0	2.58635e-05	4.04	4.51	4.89	4.48	50.72	46.94	48.48	48.7133	15.27	13.1	15.71	14.6933	3.96	4.48	3.35	3.93	0	27.1699	27.9202	27.5243	25.1038	26.9296	20.2742	19.0624	20.3284	20.2608	19.8481	20.8502	20.104	77.4262	77.7472	77.5946	80.0956	72.3735	79.9712	77.5347	78.7744	79.6655	72.9075
ENSDARG00000006560	irf4a	ENSMUSG00000021356	Irf4	ortholog_one2many	61.5217	62.8889	0	4.15	0	0.039825	0	0	0	0	0.05	0.08	0.11	0.08	0.77	1.27	2.89	1.64333	0.19	0.28	0.1	0.19	1.04072e-08	0.114669	0.0570609	0.145884	0.10398	0.105399	0	0	0	0	0	0	0	0	0	0	0	0	0	0	0	0	0
ENSDARG00000006567	dus4l	ENSMUSG00000020648	Dus4l	ortholog_one2one	67.101	63.5802	50	74.32	1	0.0170852	3.73	4.88	4.07	4.22667	7.18	7.41	7.29	7.29333	0.23	3.33	2.29	1.95	1.19	1.15	1.78	1.37333	0.000200166	0.713549	0.760865	0.722525	0.665522	0.715615	0.342145	0.294792	0.320894	0.162612	0.284721	0.618811	0.337329	1.48282	1.09199	0.765054	1.23008	1.27806	1.33118	1.19653	1.74168	1.34102	1.82088
ENSDARG00000006568	kcnmb2	ENSMUSG00000037610	Kcnmb2	ortholog_many2many	44.8276	44.2553	0	0	0	1	0	0	0	0	0	0	0	0	0	0	0	0	0	0	0	0	0.168832	0	0	0	0	0	0	0	0.0302291	0	0.0321858	0	0.0104025	0	0	0	0	0	0	0	0	0	0
ENSDARG00000006577	nadka	ENSMUSG00000029063	Nadk	ortholog_one2many	55.7252	16.6287	25	19.29	0	0.000216777	0.8	0.62	1.31	0.91	0.89	0.48	0.56	0.643333	2.23	3.27	3.44	2.98	0.4	0.06	0.29	0.25	8.51113e-07	47.4243	45.1156	46.0503	43.937	45.6318	32.2417	31.343	30.3328	31.3048	31.8663	31.4279	31.4194	42.8543	44.9003	42.8185	42.7012	45.0847	42.7684	43.5212	33.4818	34.7224	33.6741
ENSDARG00000006580	cldnd	ENSMUSG00000047501	Cldn4	ortholog_one2many	51.5957	46.1905	50	100	1	0.0823894	0	0	0	0	0	0	0	0	0	0	0	0	0	0	0	0	5.60815e-06	0.396965	0.345685	0.324659	0.485948	0.388314	0.856546	1.0045	0.937236	0.738798	1.05334	0.766761	0.892864	3.96999	4.55626	5.61489	5.13242	4.68085	5.18396	4.85639	1.80504	1.79517	1.25808
ENSDARG00000006584	phf8	ENSMUSG00000023350	4921501E09Rik	ortholog_one2many	41.8605	47.5771	0	76.7	0	0.00515488	2.98	3.04	2.32	2.78	1.56	1.87	1.99	1.80667	1.83	5.37	2.87	3.35667	2.35	1.96	2.24	2.18333	1	0	0	0	0	0	0	0	0	0	0	0	0	0	0	0	0	0	0	0	0	0	0
ENSDARG00000006585	DMWD	ENSMUSG00000030410	Dmwd	ortholog_one2one	56.8713	58.4962	0	72.28	0	0.0129995	0	0	0.01	0.00333333	0.21	0.14	0.16	0.17	0	0.16	0.3	0.153333	0.38	0.29	0.25	0.306667	8.16788e-07	7.8618	6.24537	6.53551	6.90518	6.88696	8.72274	8.29232	8.50863	9.03587	7.40505	8.13267	8.34955	9.15784	8.48854	8.18213	8.30593	7.11442	8.11963	8.22808	11.6587	10.59	10.9293
ENSDARG00000006600	lsm14aa	ENSMUSG00000066568	Lsm14a	ortholog_one2many	65.8482	63.8528	0	32.8	0	0.0375718	18.27	19.38	18.98	18.8767	7.31	9.87	7.47	8.21667	1.18	4.41	7.52	4.37	6.79	5.55	6.44	6.26	2.0444e-10	16.0021	15.4614	13.8378	14.7474	15.0122	13.7577	13.6043	14.7355	14.587	14.6468	14.7272	14.3431	19.7294	18.6584	17.7497	18.7122	17.6873	18.6097	18.5245	17.511	18.5916	18.0385
ENSDARG00000006601	kaznb	ENSMUSG00000040606	Kazn	ortholog_one2one	53.0214	65.7005	50	24.68	0	2.99906e-06	6.37	6.32	6.5	6.39667	0.99	1.43	1.94	1.45333	0.02	0.02	0.03	0.0233333	0.81	0.67	0.47	0.65	1.91635e-05	0.184912	0.125474	0.109986	0.146335	0.141677	0.282115	0.332197	0.37043	0.375429	0.319282	0.269036	0.324748	0.855864	1.01188	0.766695	0.99494	0.792876	0.85814	0.880066	0.26869	0.276435	0.348715
ENSDARG00000006602	chrna2a	ENSMUSG00000022041	Chrna2	ortholog_one2many	69.4231	70.5078	50	0	0	0.550856	0	0	0	0	0.26	0.5	0.35	0.37	0	0	0	0	0	0.01	0.00828	0.00609333	0.00122453	0	0	0	0	0	0	0	0	0	0	0	0	0	0	0	0	0	0	0	0	0	0
ENSDARG00000006603	csrp1a	ENSMUSG00000026421	Csrp1	ortholog_one2many	83.3333	82.9016	50	14.61	0	0.00415514	0.08	0.05	0.04	0.0566667	89.96	87.63	78.42	85.3367	16.17	13.28	5.57	11.6733	1.11	1.57	0.97	1.21667	1.22171e-09	3.73159	4.4015	3.96871	4.11063	4.05311	2.6508	4.17452	3.28725	2.79267	3.39708	2.49158	3.13232	9.76507	10.0584	11.0643	10.1655	10.0119	10.6103	10.2792	13.9654	12.1718	10.9371
ENSDARG00000006604	pvrl3b	ENSMUSG00000022656	Nectin3	ortholog_one2many	36.0134	39.1621	0	0.63	0	2.64627e-07	11.16	9.84	9.2	10.0667	11.26	13.08	11.34	11.8933	0.1	0.26	0.73	0.363333	0.31	0.38	0.25	0.313333	2.11432e-14	1.43505	1.62518	1.54175	1.62307	1.55626	14.3383	13.8063	14.0941	14.367	14.5009	14.4738	14.2634	4.936	5.52462	5.52601	5.16707	5.53745	5.59774	5.38148	3.51445	3.21623	3.67427
ENSDARG00000006607	gpr27	ENSMUSG00000072875	Gpr27	ortholog_one2one	53.9084	52.7704	100	99.3	1	5.89921e-12	3.83	4.63	4.05	4.17	0.08	0.13	0.07	0.0933333	0.07	0.05	0.02	0.0466667	0.05	0.01	0.00477	0.02159	8.48029e-05	0	0	0	0	0	0.0723752	0.109127	0	0.0401309	0	0.0416498	0.0438806	0.196042	0.230993	0.174284	0	0.225294	0.0895964	0.152702	0.291174	0.0827376	0.260927
ENSDARG00000006609	map2k2a	ENSMUSG00000035027	Map2k2	ortholog_one2many	81.0127	79.8005	25	9.08	0	0.00261578	25.02	29.32	29.63	27.99	7.25	5.69	6.92	6.62	6.88	17.66	17.6	14.0467	8.68	6.9	7.67	7.75	3.56466e-06	35.0808	35.2265	35.9841	33.3783	34.9174	36.3356	36.9913	35.0841	34.1671	33.8656	34.6319	35.1793	26.0614	27.9363	27.3956	26.5997	26.452	26.9314	26.896	25.4335	24.5777	24.4696
ENSDARG00000006615	hnf1ba	ENSMUSG00000020679	Hnf1b	ortholog_one2many	80.5405	80.1075	50	50.52	0	2.74398e-09	0	0	0	0	0.01	0.07	0.04	0.04	0.02	0	0.06	0.0266667	10.76	10.49	11.75	11	0.000422098	0	0	0	0	0	0	0	0	0	0	0	0	0.0878328	0.0862432	0.0325351	0.0647659	0.0672923	0	0.0564449	0	0	0
ENSDARG00000006617	napga	ENSMUSG00000024581	Napg	ortholog_one2many	72.5806	72.1154	0	55.86	0	2.94606e-08	2.67	3.65	3.96	3.42667	6.67	7.51	7.26	7.14667	0.34	0.83	0.61	0.593333	4.6	4.37	5.02	4.66333	5.45338e-08	6.57552	6.1253	6.13787	5.76225	6.15024	7.75204	6.52463	7.24953	7.14223	7.87551	8.24477	7.46479	7.06915	6.61919	6.21571	6.38816	5.86264	6.30753	6.4104	8.42747	6.78584	7.23448
ENSDARG00000006621	pspc1	ENSMUSG00000021938	Pspc1	ortholog_one2one	64.8438	63.4799	0	64.63	0	9.16562e-05	20.19	24.08	25.94	23.4033	11.45	10.9	12.69	11.68	9.02	6.55	9.67	8.41333	1.93	1.96	1.59	1.82667	8.67579e-12	3.21905	4.14462	3.90304	3.74774	3.75361	4.61979	4.47022	4.39359	3.97408	5.03009	5.01896	4.58445	4.23357	3.74355	3.66492	3.67365	4.27391	3.98195	3.92859	4.29289	4.36813	3.55417
ENSDARG00000006624	ppp2r2ab	ENSMUSG00000022052	Ppp2r2a	ortholog_one2many	92.4107	92.6174	50	67.78	0	0.000425921	13.66	13.68	14.1	13.8133	6.16	8.4	7.92	7.49333	4.06	5.08	6.73	5.29	0.95	1.06	0.92	0.976667	1.97438e-14	19.8932	20.1315	19.9887	20.1403	20.0384	16.8079	17.8638	17.9227	17.191	17.8355	18.2113	17.6387	22.2011	23.7127	21.6808	22.3235	24.9539	24.571	23.2405	18.4094	18.7738	17.5226
ENSDARG00000006636	slitrk2	ENSMUSG00000036790	Slitrk2	ortholog_one2one	72.5995	73.286	25	100	1	0.0228105	1.53	1.74	1.05	1.44	0.19	0.12	0.18	0.163333	0	0.03	0.58	0.203333	0	0.00564	0	0.00188	1.70522e-11	0.0111523	0.0554954	0.0243226	0.036406	0.0318441	0	0	0	0.0118605	0.0249201	0.0492375	0.0143364	0	0	0	0	0	0	0	0.270458	0.354564	0.411284
ENSDARG00000006639	lnpb	ENSMUSG00000009207	Lnpk	ortholog_one2many	51.6539	47.7647	0	14.4	0	4.60773e-05	6.17	7.11	7.18	6.82	3.05	2.63	2.03	2.57	3.82	2.89	2.48	3.06333	1.28	1	0.9	1.06	1.35729e-11	3.28786	3.4681	3.4243	3.74904	3.48232	6.65537	6.5856	6.65223	6.54309	6.93984	6.95371	6.72164	3.93789	3.77623	3.4781	3.89173	3.67915	3.22547	3.66476	3.91729	3.8419	4.51518
ENSDARG00000006640	eomesa	ENSMUSG00000032446	Eomes	ortholog_one2many	63.5401	59.4059	0	59.57	0	0.0101319	0	0.01	0	0.00333333	1.24	1.89	0.93	1.35333	0.36	1.52	1.11	0.996667	0.02	0.05	0.03	0.0333333	0.0165089	0	0	0	0	0	0	0	0	0	0	0	0	0	0	0	0	0	0	0	0	0	0
ENSDARG00000006642	drg2	ENSMUSG00000020537	Drg2	ortholog_one2one	91.7582	91.7582	50	56.48	0	0.00530385	58.03	57.51	57.35	57.63	75.57	79.85	78.08	77.8333	6.04	20.31	16.69	14.3467	6.59	6.29	8.11	6.99667	6.58051e-15	23.9876	22.6843	21.4544	22.8527	22.7447	22.2085	21.9722	22.8384	22.4057	21.8702	20.1044	21.8999	21.8906	21.3252	20.3421	22.7254	19.2143	21.8998	21.2329	20.3711	19.8596	19.1563
ENSDARG00000006666	BUD13	ENSMUSG00000032077	Bud13	ortholog_one2one	49.2278	40.0314	0	27.3	0	0.013225	10.78	6.7	6.63	8.03667	7.55	8.68	6.5	7.57667	0.46	1.17	1.84	1.15667	1.28	1.21	1.21	1.23333	1.45525e-07	3.05653	2.56874	2.59237	2.66075	2.7196	2.27982	2.26985	2.30452	2.64864	2.70665	2.77388	2.49723	2.25841	2.44853	2.48354	2.54999	1.89247	2.66101	2.38232	2.59561	2.53177	2.71365
ENSDARG00000006672	fam49a	ENSMUSG00000020589	Fam49a	ortholog_one2one	86.3777	86.3777	0	98.88	1	1.17456e-06	35.15	29.98	31.06	32.0633	32.52	31.93	32.43	32.2933	7.83	8.4	7.93	8.05333	1.17	1.56	1.07	1.26667	3.09276e-10	69.0243	68.7317	64.1976	68.5728	67.6316	39.4632	40.2958	42.6735	42.6956	43.7321	42.9364	41.9661	13.7566	14.8356	15.4375	15.0661	15.0321	15.3425	14.9117	29.4347	29.6611	29.6804
ENSDARG00000006677	ripk1l	ENSMUSG00000021408	Ripk1	ortholog_one2one	37.0651	37.3476	0	44.3	0	0.000506564	0	0	0	0	0.38	0.4	0.44	0.406667	2.18	2.97	1.68	2.27667	1.77	1.22	1.87	1.62	5.94699e-09	5.9017	6.28261	5.90733	6.70943	6.20027	3.91392	3.722	3.8975	3.99693	4.36301	4.19682	4.01503	4.28641	4.35861	4.44125	5.12911	5.0487	4.82779	4.68198	5.53463	5.26294	4.90652
ENSDARG00000006678	pth2r	ENSMUSG00000025946	Pth2r	ortholog_one2many	54.087	56.9597	0	10.9	0	0.550856	0	0	0	0	0.16	0.43	0.31	0.3	0.03	0	0	0.01	0	0.01	0.03	0.0133333	1	0	0	0	0	0	0	0	0	0	0	0	0	0	0	0	0	0	0	0	0	0	0
ENSDARG00000006683	arhgef6	ENSMUSG00000031133	Arhgef6	ortholog_one2one	62.5326	60.2516	75	1.58	1	6.20445e-09	12.4	11.53	12.19	12.04	1.03	0.93	1.13	1.03	6.45	7.81	6.35	6.87	1.25	2	1.14	1.46333	0	3.05568	3.08303	2.7806	2.74027	2.9149	2.06137	2.07209	1.89069	1.72571	1.73054	2.03525	1.91928	4.09466	4.31081	3.79593	3.80239	4.78112	4.52831	4.21887	6.21406	6.48041	5.91377
ENSDARG00000006691	rpl12	ENSMUSG00000066983	Gm16519	ortholog_one2many	81.8182	83.3333	25	98.9	1	7.44892e-06	57.78	57.07	52.42	55.7567	254.73	305.08	277.48	279.097	181.83	146.69	100.14	142.887	502.6	438.15	487.02	475.923	0.461287	0	0	0	0	0	0	0	0	0	0	0	0	0	0	0	0	0	0	0	0	0	0
ENSDARG00000006712	wipf2b	ENSMUSG00000038013	Wipf2	ortholog_one2many	62.8118	62.9545	0	71.41	0	2.19872e-06	0.2	0.1	0.08	0.126667	0.84	0.93	0.67	0.813333	1.31	1.14	1.03	1.16	4.2	3.72	4	3.97333	0.101534	0.679952	0.82581	0.653497	0.702264	0.715381	1.09415	1.2776	1.35444	1.40948	1.69963	1.32291	1.3597	0.910073	0.740749	0.745191	1.11256	0.825684	0.903	0.872876	0.952794	0.985487	0.996123
ENSDARG00000006747	tmem178b	ENSMUSG00000057716	Tmem178b	ortholog_one2many	41.1565	87.0504	50	96.31	0	3.44415e-08	12.87	12.9	12.39	12.72	0.49	0.56	0.49	0.513333	1.26	2.86	1.16	1.76	0.09	0.11	0.09	0.0966667	0	0.120084	0.11951	0.183327	0.130668	0.138397	0.11516	0.162062	0.176412	0.127709	0.0268329	0.0795254	0.114617	0	0	0	0.0276015	0	0	0.00460025	0.0529488	0	0.0276783
ENSDARG00000006754	mllt3	ENSMUSG00000028496	Mllt3	ortholog_one2one	62.3423	60.8084	50	83.29	1	3.03152e-08	12.77	11.44	11.55	11.92	1.19	1.7	1.46	1.45	0	0.03	0	0.01	0.07	0.03	0.02	0.04	4.23203e-06	1.11851	1.1804	1.01505	1.16808	1.12051	3.08114	3.22742	3.24537	2.7862	2.70899	3.00766	3.00946	2.14497	2.14444	2.14093	2.20856	2.24989	2.16559	2.17573	2.80519	2.54296	2.52615
ENSDARG00000006757	klhl41b	ENSMUSG00000075307	Klhl41	ortholog_one2many	61.4876	61.3861	25	6.27	0	0.550856	0	0	0	0	0.75	0.92	0.89	0.853333	0	0.04	0	0.0133333	0.00974	0.00751	0	0.00575	0.0983777	0.106893	0.0709218	0.0777092	0.0775434	0.0832669	0.10251	0	0	0	0	0.0786555	0.0301942	0	0	0	0	0	0	0	0	0	0
ENSDARG00000006758	fam234b	ENSMUSG00000030207	Fam234b	ortholog_one2one	32.0064	32.2115	0	11.36	0	1.41206e-05	15.43	16.64	14.95	15.6733	1.14	1.27	1.15	1.18667	0.08	0.53	0.81	0.473333	0.56	0.64	0.38	0.526667	6.28122e-13	10.247	10.3797	9.88036	10.3416	10.2122	34.2813	34.0072	34.2139	35.0083	34.7971	33.2972	34.2675	13.248	13.487	12.4038	12.8102	13.9171	12.8925	13.1264	8.407	8.08947	7.33194
ENSDARG00000006760	slc24a3	ENSMUSG00000063873	Slc24a3	ortholog_one2one	70.1639	71.9328	25	41.34	0	1.70911e-06	3.27	2.87	3.08	3.07333	0.14	0.21	0.06	0.136667	15.33	16.73	12.23	14.7633	1.14	1.46	1.12	1.24	3.85718e-11	79.6467	79.3843	76.1735	75.9464	77.7877	13.6705	13.7987	14.8755	14.8242	14.1398	14.3393	14.2747	5.45695	5.19704	5.289	5.10543	5.06882	5.29734	5.23576	29.9694	30.4981	30.331
ENSDARG00000006766	snd1	ENSMUSG00000001424	Snd1	ortholog_one2one	83.4611	83.7363	25	61.85	0	0.00132721	14.17	17.27	16.56	16	14.32	15.43	12.42	14.0567	9.48	13.15	19.62	14.0833	20.86	13.23	23.46	19.1833	1.8294e-05	14.2726	15.0834	14.0023	14.5048	14.4658	8.33145	8.61637	9.09127	9.36625	9.05308	9.98418	9.07377	15.7848	17.1184	14.5923	15.0863	16.0168	15.8533	15.742	11.6552	10.9373	10.5348
ENSDARG00000006773	elovl4a	ENSMUSG00000032262	Elovl4	ortholog_one2many	66.9967	65.0641	50	38.73	0	3.45196e-06	33.01	30.61	31.77	31.7967	0.19	0.13	0.17	0.163333	0.87	1.09	1.03	0.996667	0.01	0.02	0.03	0.02	3.98795e-07	25.729	25.0726	22.5687	25.4369	24.7018	11.1947	10.9371	10.7181	10.6727	11.0459	10.4522	10.8368	5.19822	5.37757	4.98574	5.81802	5.44047	5.62113	5.40686	12.0144	11.4916	13.453
ENSDARG00000006775	cass4	ENSMUSG00000074570	Cass4	ortholog_one2one	27.4905	27.1144	25	6.41	0	0.000386085	0.2	0.11	0.15	0.153333	0.06	0.07	0.03	0.0533333	2.41	4.52	4.18	3.70333	0.07	0.12	0.06	0.0833333	0.136251	0	0	0	0	0	0	0	0	0	0	0	0	0	0	0	0	0	0	0	0	0	0
ENSDARG00000006782	rb1	ENSMUSG00000022105	Rb1	ortholog_one2one	51.6058	50.5972	50	2.51	0	0.0492172	1.29	1.68	1.44	1.47	1.7	1.93	1.84	1.82333	2.41	2.62	6.84	3.95667	0.78	1.16	0.78	0.906667	4.64109e-12	15.2058	14.4324	15.1602	12.6011	14.3498	7.19774	6.39757	6.4767	7.45631	6.87919	8.30072	7.11804	6.24199	6.67925	7.35164	7.12787	7.28069	7.04295	6.95406	8.43868	8.40895	8.4426
ENSDARG00000006786	copz2	ENSMUSG00000018672	Copz2	ortholog_one2one	70.8995	65.3659	75	10.05	1	1.86442e-05	103.6	105.3	120	109.633	16.25	14.46	15.5	15.4033	2.12	2.19	1.35	1.88667	17.33	11.55	12.02	13.6333	0	2.2038	2.68067	2.04715	2.70891	2.41013	3.87463	4.36688	4.92483	4.55726	3.64773	3.60362	4.16249	18.9549	20.6105	18.3308	18.3389	20.0776	19.6224	19.3225	13.0013	14.9883	11.9934
ENSDARG00000006791	arntl1a	ENSMUSG00000055116	Arntl	ortholog_one2many	81.4241	84.0256	0	65.18	0	0.00855652	35.89	32	32.33	33.4067	10.67	12.05	10.84	11.1867	0.15	3.77	1.49	1.80333	2.91	2.33	2.79	2.67667	1.09278e-06	12.1923	11.2587	10.5511	10.9805	11.2457	12.3953	12.5069	12.7682	13.2523	13.1579	12.6752	12.7927	4.56978	4.53693	4.23186	4.21207	4.98906	4.4961	4.50597	8.18789	7.68774	7.06782
ENSDARG00000006797	nt5dc1	ENSMUSG00000039480	Nt5dc1	ortholog_one2one	54.2299	53.5332	25	84.61	1	0.00062864	5.27	3.75	4.41	4.47667	1.16	1.39	1.44	1.33	1.99	2.67	2.47	2.37667	0.39	0.47	0.73	0.53	4.15995e-05	8.15854	8.76578	9.14292	8.38616	8.61335	5.87477	5.63319	6.93179	7.02533	6.90737	6.41877	6.4652	4.54656	4.75229	4.62867	4.37992	4.98899	5.96557	4.877	6.03709	5.23036	5.72602
ENSDARG00000006811	sult1st6	ENSMUSG00000023122	Sult1c2	ortholog_many2many	47.7816	47.2973	25	4.67	0	8.78767e-07	0	0.05	0.02	0.0233333	231.88	214.69	227.73	224.767	0	0	0.15	0.05	45.41	42.97	53.32	47.2333	0.000687688	0	0	0	0	0	0	0	0	0	0	0	0	0	0	0	0	0	0	0	0	0	0
ENSDARG00000006812	wdr26b	ENSMUSG00000038733	Wdr26	ortholog_one2many	86.9792	78.1591	0	68.17	0	6.2575e-08	11.67	12.22	9.99	11.2933	3.15	3.21	3.48	3.28	1.22	1.39	2.91	1.84	8.04	7.82	8.36	8.07333	4.84241e-14	3.00829	2.93679	2.99247	2.92362	2.96529	3.60066	3.40909	3.56636	3.7366	4.04094	4.13149	3.74752	2.55311	2.70604	2.55876	2.65236	2.70098	2.67173	2.6405	2.89845	3.36093	2.95086
ENSDARG00000006816	gtf2f2b	ENSMUSG00000067995	Gtf2f2	ortholog_one2many	69.9219	71.8876	0	40.84	0	0.107082	0	0	0	0	0	0	0	0	0.26	0.28	0	0.18	0	0	0	0	4.51994e-08	13.8207	13.1434	13.5974	13.5684	13.5325	12.7238	14.744	14.6959	13.9144	12.9707	14.1698	13.8698	12.1904	13.7872	13.3339	13.4834	13.4225	14.5117	13.4548	13.2036	11.0439	12.3883
ENSDARG00000006818	urod	ENSMUSG00000028684	Urod	ortholog_one2one	67.2087	67.5749	50	13.18	0	0.0140889	8.42	10.75	10.14	9.77	6.92	7.15	5.93	6.66667	4.32	10.42	11.71	8.81667	2.62	3.59	2.94	3.05	1.66624e-08	21.8409	23.8479	22.4894	22.4793	22.6644	20.445	19.1097	19.6339	17.0509	19.234	18.7327	19.0344	25.5847	25.7603	25.6203	25.7403	27.3673	28.5715	26.4407	26.9128	25.0499	25.9723
ENSDARG00000006832	galnt9	ENSMUSG00000033316	Galnt9	ortholog_one2one	85.0993	85.0993	25	61.29	0	0.000203454	32.92	34.9	32.85	33.5567	0.04	0.06	0.02	0.04	0.08	0.77	0.53	0.46	0	0	0	0	1.08742e-06	0	0	0	0	0	2.47231	2.1384	1.82445	1.6259	1.74159	2.01831	1.97016	0.591805	0.519926	0.899944	0.689027	0.465337	0.462647	0.604781	1.42092	1.05164	0.794588
ENSDARG00000006837	mycn	ENSMUSG00000037169	Mycn	ortholog_one2many	44.5328	48.4848	50	70.22	0	0.000929798	0	0	0	0	0.13	0.41	0.15	0.23	0.22	0.4	0.93	0.516667	0.18	0.12	0.04	0.113333	3.34637e-13	7.66436	7.40982	7.70108	6.55279	7.33201	2.02127	2.32204	2.01062	2.27064	2.5995	1.78254	2.16777	9.58482	10.1375	8.75489	8.93416	8.66163	9.68393	9.29281	7.121	7.14208	8.17039
ENSDARG00000006838	eef1a2	ENSMUSG00000016349	Eef1a2	ortholog_one2one	92.8726	92.8726	0	0	0	0.376955	4.44	4.22	3.47	4.04333	0.29	0.17	0.15	0.203333	2.09	0.29	0.08	0.82	0.01	0.00842	0.00966	0.00936	4.16596e-10	0	0	0	0.0470507	0.0117627	0.0414664	0.0416821	0.136118	0	0.0966192	0.0477254	0.0606019	0.0898558	0	0.0499267	0.0993865	0.103263	0	0.0570721	0.190656	0.189614	0.149495
ENSDARG00000006840	gnmt	ENSMUSG00000002769	Gnmt	ortholog_one2one	73.8095	74.0614	0	100	1	9.19252e-07	0.32	0.59	0.46	0.456667	9.34	7.68	8.72	8.58	22.34	28.85	24.81	25.3333	210.03	218.29	267.85	232.057	8.8718e-06	4.55785	5.35407	3.58506	5.61003	4.77675	1.36145	1.94475	1.17608	1.58926	1.33568	0.824708	1.37199	7.06493	5.10751	5.86668	6.69796	4.90715	4.08043	5.62078	5.68317	5.24252	4.73607
ENSDARG00000006848	PARP9	ENSMUSG00000022906	Parp9	ortholog_one2one	30	30.3614	25	34.08	0	5.96941e-05	0	0	0	0	5.95	5.44	5.48	5.62333	7.14	4.7	6	5.94667	1.53	1.63	0.76	1.30667	4.90918e-06	1.51665	1.71188	1.59335	1.40882	1.55767	0.638541	0.891476	0.659879	0.668783	0.950565	0.9799	0.798191	5.7846	5.6233	6.7272	5.95177	6.29435	5.88468	6.04432	1.95728	1.58159	1.55603
ENSDARG00000006849	asic2	ENSMUSG00000020704	Asic2	ortholog_one2one	61.7261	58.4369	0	41.18	0	1	4.39	6.32	6.51	5.74	0.59	0.65	0.47	0.57	0	0	0	0	0	0	0	0	0.000262106	0.0845319	0.021032	0.115224	0.068987	0.0724438	0.243197	0.305577	0.177405	0.247223	0.306943	0.163278	0.240604	0.0439164	0.172486	0.0976054	0.0971489	0.176642	0.0501774	0.106329	0	0	0
ENSDARG00000006859	nkain1	ENSMUSG00000078532	Nkain1	ortholog_one2one	80.1932	80.1932	0	99.22	1	4.15378e-05	13.54	12.3	11.78	12.54	8.48	8.06	6.68	7.74	1.16	0.62	0.27	0.683333	0.52	0.27	0.45	0.413333	8.73064e-06	0	0	0	0	0	0	0	0	0	0	0	0	0	0	0	0	0	0	0	0	0	0
ENSDARG00000006862	kifap3b	ENSMUSG00000026585	Kifap3	ortholog_one2many	80.7351	80.3279	0	0.33	0	2.21888e-06	8.48	8.57	8.42	8.49	3.43	3.39	3.54	3.45333	0.76	2.17	0.46	1.13	0.14	0.19	0.29	0.206667	0	291.176	290.166	288.3	287.489	289.282	17.0807	15.8272	17.5114	16.625	15.9598	16.8824	16.6477	13.7691	12.9241	13.2264	12.4676	13.2489	15.0655	13.4502	72.7659	71.4076	71.8557
ENSDARG00000006863	CFAP65	ENSMUSG00000047021	Cfap65	ortholog_one2one	34.8315	33.5679	0	10.91	0	0.0192564	3.19	2.56	2.54	2.76333	0.02	0.07	0.08	0.0566667	0.21	0.23	0	0.146667	0.02	0.03	0.01	0.02	0.00325386	0	0	0	0	0	0	0	0	0	0	0	0	0	0	0	0	0	0	0	0	0	0
ENSDARG00000006865	glra4a	ENSMUSG00000018595	Glra4	ortholog_one2many	82.2757	82.4561	0	1.87	0	7.01119e-05	0	0.02	0	0.00666667	0.47	0.68	0.52	0.556667	0	0.03	0	0.01	0	0.02	0	0.00666667	0.000184166	0	0	0	0	0	0.042993	0.0432166	0.0940863	0.0953559	0	0.0494825	0.0541891	0	0	0	0	0	0	0	0	0	0
ENSDARG00000006868	trh	ENSMUSG00000005892	Trh	ortholog_one2one	32.1608	25	0	0	0	1	0	0	0	0	0	0.01	0.06	0.0233333	0	0	0	0	0	0	0	0	0.622347	0	0	0	0	0	0	0.0627641	0	0	0	0.287456	0.05837	0	0	0	0	0	0	0	0	0	0
ENSDARG00000006869	stx17	ENSMUSG00000061455	Stx17	ortholog_one2one	53.7671	52.1595	100	72.33	1	0.0175552	10.78	8.98	6.94	8.9	2.7	3.91	3.54	3.38333	2	5.03	2.44	3.15667	2.37	2.09	1.84	2.1	2.05474e-11	3.58318	3.20342	3.54311	3.07295	3.35067	2.64999	2.85405	2.50133	3.0195	2.69717	2.49697	2.70317	4.33836	4.55416	4.33019	3.99586	4.60497	4.43414	4.37628	5.8913	5.20992	6.42167
ENSDARG00000006877	enpp4	ENSMUSG00000023961	Enpp4	ortholog_one2one	53.5948	53.9474	0	90.37	1	0.0026984	0.76	0.4	0.27	0.476667	0.03	0.04	0.07	0.0466667	3.72	3.27	1.4	2.79667	0.38	0.41	0.29	0.36	1.12993e-13	28.2783	27.5139	25.9019	27.1368	27.2077	19.1025	18.6113	20.0518	18.1368	19.0094	18.9323	18.974	11.1493	10.4032	10.0853	9.58391	10.6421	10.2521	10.3526	12.4165	13.1285	14.302
ENSDARG00000006889	mpped2a	ENSMUSG00000016386	Mpped2	ortholog_one2many	92.1769	92.1769	50	48.61	0	9.3602e-05	11.73	10.92	10.14	10.93	10.82	10.58	11.16	10.8533	0.88	2.86	3.06	2.26667	0.98	1.01	0.97	0.986667	0.000117559	0.210478	0.130921	0.31559	0.22903	0.221505	0.227078	0.253622	0.220862	0.195862	0.205764	0.261354	0.227424	0.546743	0.483163	0.425303	0.514024	0.40841	0.374814	0.458743	0.0580041	0.0576869	0
ENSDARG00000006891	kcns3a	ENSMUSG00000043673	Kcns3	ortholog_one2one	60.7214	61.7108	50	86.32	1	1	0	0	0	0	0.04	0	0.04	0.0266667	0	0	0	0	0	0	0	0	2.72523e-11	40.2097	39.7538	38.1939	37.1507	38.827	24.7468	24.1088	23.5851	25.1251	24.5522	23.9627	24.3468	0.703983	0.991782	0.850338	0.812507	0.7035	0.454631	0.75279	10.0988	11.3031	11.916
ENSDARG00000006892	myo3b	ENSMUSG00000042064	Myo3b	ortholog_one2one	69.3956	68.042	75	52.58	1	2.6805e-08	26.76	29.43	26.81	27.6667	0	0.01	0	0.00333333	0	0	0	0	0.43	0.13	0.19	0.25	1	0	0	0	0	0	0	0	0	0	0	0	0	0	0	0	0	0	0	0	0	0	0
ENSDARG00000006894	oprk1	ENSMUSG00000025905	Oprk1	ortholog_one2one	66.5782	66.0526	50	77.27	1	1	0	0	0	0	0.22	0.21	0.21	0.213333	0	0	0	0	0	0	0	0	1	0	0	0	0	0	0	0	0	0	0	0	0	0	0	0	0	0	0	0	0	0	0
ENSDARG00000006896	lhx6	ENSMUSG00000026890	Lhx6	ortholog_one2one	76	72.7041	100	70.87	1	0.265271	0	0.07	0.01	0.0266667	0	0	0	0	0.47	0.15	0	0.206667	0.07	0.05	0.04	0.0533333	0.000416993	0	0	0	0	0	0	0	0	0	0	0	0	0	0	0	0	0	0	0	0	0	0
ENSDARG00000006899	far1	ENSMUSG00000030759	Far1	ortholog_one2one	77.9923	78.4466	0	54.23	0	8.04855e-11	92.34	85.72	78.37	85.4767	7.56	7.21	6.14	6.97	2.81	2.8	4.11	3.24	0.37	0.48	0.11	0.32	0	140.15	138.245	134.982	137.019	137.599	41.1642	40.3539	40.7339	42.1997	43.5331	42.3152	41.7167	48.9479	47.4685	45.8557	46.0141	48.9044	48.6482	47.6398	279.178	281.686	294.877
ENSDARG00000006900	impdh2	ENSMUSG00000062867	Impdh2	ortholog_one2one	91.4397	91.4397	25	98.7	1	0.0228853	16.03	19.12	17.76	17.6367	73.95	76.35	74.09	74.7967	4.83	12.68	16.26	11.2567	7.07	4.79	8.26	6.70667	3.74746e-05	8.17061	7.57783	7.88789	7.71172	7.83701	8.56577	8.01748	8.08203	8.81399	7.62359	7.20817	8.05184	8.33752	7.79821	7.6759	7.23613	7.86808	7.50968	7.73759	9.13583	8.28323	9.01128
ENSDARG00000006901	AEBP1 (1 of many)	ENSMUSG00000020473	Aebp1	ortholog_one2many	37.6905	41.6667	0	6.79	0	0.223701	0	0	0.01	0.00333333	47.24	50.43	48.91	48.86	0.98	0	0	0.326667	0.73	1.38	0.73	0.946667	0	3.66395	3.77905	2.76048	3.16536	3.34221	15.7585	16.0545	14.2837	15.6572	15.2827	15.343	15.3966	77.7326	77.0507	74.7151	78.1172	76.2059	74.4735	76.3825	12.1411	12.2695	11.0554
ENSDARG00000006911	wnt8b	ENSMUSG00000036961	Wnt8b	ortholog_one2one	79.0503	76.9022	0	37.78	0	0.666596	0	0.01	0	0.00333333	0	0	0	0	0	0.49	0.02	0.17	0.05	0.00932	0	0.0197733	0.000349384	0.0266916	0.0531283	0.0873193	0.0871329	0.0635681	0.0255971	0.0514606	0.112034	0.141932	0.0596429	0.117843	0.0847517	0	0	0.0924591	0.0613511	0.0637443	0.126751	0.0573843	0	0	0
ENSDARG00000006915	arl8ba	ENSMUSG00000030105	Arl8b	ortholog_one2one	97.3118	97.3118	25	7.28	0	4.2098e-07	59.36	48.02	49.25	52.21	25.15	24.05	23	24.0667	20.74	22.11	17.66	20.17	6.82	9.17	7.64	7.87667	2.7276e-11	36.5554	35.8803	36.3963	34.6548	35.8717	34.2268	34.1333	34.0311	35.9239	37.2004	34.6633	35.0298	24.8342	24.3847	24.0199	23.8613	24.2395	24.6248	24.3274	29.6288	28.7389	30.0256
ENSDARG00000006916	VMAC	ENSMUSG00000054723	Vmac	ortholog_one2one	41.4365	43.1034	50	39.59	0	0.590408	0.24	0.53	0.18	0.316667	0.9	0.9	1.15	0.983333	1.66	0.11	0	0.59	0.51	0.45	0.34	0.433333	0	24.0322	22.6566	24.7817	22.6178	23.5221	19.174	19.5027	19.6508	17.3897	19.4631	18.0479	18.8714	35.8311	37.4042	33.9662	35.9915	34.8425	33.3719	35.2346	35.9184	36.8505	33.9472
ENSDARG00000006921	lrp5	ENSMUSG00000024913	Lrp5	ortholog_one2one	74.6749	74.7212	75	2.24	1	0.000337386	0	0.04	0.04	0.0266667	1.02	0.9	1.09	1.00333	0.9	1.07	0.38	0.783333	6.62	5.31	7.12	6.35	0.000409534	0.0277606	0.0552561	0	0.0100692	0.0232715	0.168608	0.0981228	0.165071	0.118093	0.186095	0.153204	0.148199	0.0480744	0.00944087	0.0534234	0.0319041	0.0441981	0.0219713	0.0348354	0.112205	0.0507233	0.159965
ENSDARG00000006923	cacna1ab	ENSMUSG00000034656	Cacna1a	ortholog_one2many	71.4101	69.9324	25	6.76	0	1.64323e-05	0	0	0	0	0.41	0.38	0.4	0.396667	0.03	0.07	0.05	0.05	0	0	0.00224	0.000746667	0	0.11838	0.0785432	0.077454	0.0772887	0.0879165	0.0832524	0.0608621	0.0579696	0.0755381	0.0529045	0.0871079	0.0696058	0.0738017	0.0885696	0.145801	0.0453498	0.122509	0.074954	0.0918308	0.0521976	0.0778682	0.0909521
ENSDARG00000006924	fbxo38	ENSMUSG00000042211	Fbxo38	ortholog_one2one	72.1429	67.6717	0	89.09	1	0.0130561	3.37	3.97	4.65	3.99667	2.13	2.45	2.51	2.36333	2.63	1.77	1.76	2.05333	3.07	2.39	5.67	3.71	8.61436e-08	16.7572	15.8392	15.6979	16.8488	16.2858	15.2035	15.7973	15.6661	14.8947	16.1295	15.4358	15.5211	17.5182	17.725	16.4323	17.0162	16.503	17.4071	17.1003	15.6423	16.7049	14.2473
ENSDARG00000006944	gdpd3b	ENSMUSG00000030703	Gdpd3	ortholog_one2many	44.4444	42.4242	0	0	0	0.316679	0	0	0	0	0.11	0.05	0.07	0.0766667	0	0.18	0.07	0.0833333	0.1	0.02	0	0.04	4.86799e-07	0	0	0	0	0	0.237189	0.198686	0.173022	0.306875	0.368444	0.272991	0.259535	0.128495	0.0841127	0.0475971	0.0947491	0.098445	0.195751	0.108192	0.13632	0.0903831	0.0475065
ENSDARG00000006963	cse1l	ENSMUSG00000002718	Cse1l	ortholog_one2one	86.7147	86.7147	0	99.93	1	8.94084e-05	26.18	27.55	26.46	26.73	14.43	15.73	15.65	15.27	7.35	7.9	14	9.75	1.31	1.61	1.56	1.49333	2.088e-05	13.8935	13.7081	12.4669	12.1614	13.0575	14.0285	14.0355	14.4713	14.5394	12.6014	12.6565	13.7221	7.47547	8.10732	8.01123	7.89521	8.38683	8.96726	8.14055	7.27141	7.98104	7.8778
ENSDARG00000006978	zak	ENSMUSG00000004085	Map3k20	ortholog_one2many	60.076	59.1022	100	37.01	1	2.43467e-06	0	0.08	0.14	0.0733333	0.08	0.3	0.19	0.19	0.07	0	0	0.0233333	0.37	0.4	0.64	0.47	0	4.2775	4.16894	4.37477	4.24016	4.26534	0.900255	0.682972	0.715564	0.828823	0.56399	0.694019	0.730937	0.975406	1.03907	0.950998	1.02797	0.983472	0.956758	0.988947	1.46435	1.29129	1.32682
ENSDARG00000006981	ccdc113	ENSMUSG00000036598	Ccdc113	ortholog_one2one	37.9888	36.0743	25	14.31	0	1.03007e-08	33.33	32.3	30.12	31.9167	1.92	3.24	2.48	2.54667	0	0.78	0	0.26	0.25	0.16	0.05	0.153333	0.000135062	0	0	0	0	0	0.339953	0	0.0743955	0	0.237633	0.0782532	0.121706	0.220999	0.072333	0.245588	0.0814797	0.253974	0.252505	0.187813	0	0	0
ENSDARG00000006983	celf3b	ENSMUSG00000028137	Celf3	ortholog_one2many	80.9955	72.4696	0	78.34	1	0.000265799	1.17	1.23	1.11	1.17	0.01	0	0	0.00333333	0.04	0.58	0.12	0.246667	0.12	0.34	0.16	0.206667	0	0.0493939	0	0.0179542	0.0179159	0.021316	0.0473685	0.0476149	0.0172769	0.0350202	0.0367905	0	0.0306785	0.0513227	0.0671918	0.019011	0.0189221	0.0589806	0.0195465	0.0391625	0	0.0180502	0.0189748
ENSDARG00000006990	creld1b	ENSMUSG00000030284	Creld1	ortholog_one2many	59	56.1905	25	72.43	0	0.0146029	0	0	0	0	0	0	0	0	0	0	0	0	0	0	0	0	0.00174186	11.4292	12.2441	12.7207	11.7942	12.047	12.8175	11.9281	13.6037	11.9289	12.7957	13.2665	12.7234	9.39733	7.99856	7.6345	8.27726	7.33126	8.04579	8.11412	11.5315	11.5978	11.8926
ENSDARG00000007009	hoxa11b	ENSMUSG00000038210	Hoxa11	ortholog_one2many	71.7314	64.8562	75	99.95	1	0.584241	0	0	0	0	0.45	0.49	0.28	0.406667	0	0	0.55	0.183333	0.05	0.0091	0	0.0197	0.778238	0	0	0	0	0	0	0	0	0	0	0	0	0	0	0	0	0	0	0	0	0	0
ENSDARG00000007024	uox	ENSMUSG00000028186	Uox	ortholog_one2one	65.7718	64.6865	0	54.9	0	1.9087e-11	0	0.01	0	0.00333333	0	0	0	0	0	0.24	0	0.08	777.2	835.13	839.66	817.33	0.000132155	0	0	0	0	0	0	0	0	0	0	0	0	0	0	0	0	0	0	0	0	0	0
ENSDARG00000007025	ttc9c	ENSMUSG00000071660	Ttc9c	ortholog_one2one	38.7097	49.1228	0	0	0	0.22466	2.35	1.99	1.97	2.10333	5.95	6.58	6.02	6.18333	3.2	0.18	1.35	1.57667	1.86	1.64	2.09	1.86333	2.79791e-10	18.185	20.1917	19.337	21.9045	19.9046	15.5306	14.4994	15.356	14.4326	14.1261	14.205	14.6916	9.09506	9.18429	9.89808	9.3579	9.80395	9.34448	9.44729	17.428	18.3741	17.6992
ENSDARG00000007034	hnrpkl	ENSMUSG00000021546	Hnrnpk	ortholog_one2many	83.0626	77.1552	25	39.92	0	2.14456e-09	34.05	38.79	35.31	36.05	21.51	20.28	22.59	21.46	14.45	15.84	16.08	15.4567	3.03	5.67	6.14	4.94667	5.88655e-07	173.792	171.084	167.906	167.6	170.095	144.947	146.425	148.616	150.468	150.087	149.26	148.3	149.319	150.353	148.665	149.459	152.864	157.182	151.307	140.042	140.608	140.991
ENSDARG00000007040	tmigd1	ENSMUSG00000020839	Tmigd1	ortholog_one2one	32.9317	31.4176	0	0	0	0.561575	0	0	0	0	0	0	0	0	0	0	0	0	31.81	0.01	0	10.6067	0.000967716	0	0	0	0	0	0.17341	0.116208	0.126497	0.0641021	0.0673426	0.266113	0.135612	0	0	0	0	0	0	0	0	0	0
ENSDARG00000007045	cnot4a	ENSMUSG00000038784	Cnot4	ortholog_one2many	66.2879	73.9437	0	3.87	0	5.97506e-05	5.75	5	5.46	5.40333	4.44	5.51	5.64	5.19667	2.45	1.2	0.84	1.49667	2.48	2.03	2.5	2.33667	0	10.7724	11.358	11.9464	11.8612	11.4845	13.4526	13.646	12.8583	13.4987	14.2423	13.9692	13.6112	8.8936	8.69532	8.06699	8.07131	9.06315	8.94561	8.62266	9.59651	10.1455	10.2858
ENSDARG00000007065	mrps18b	ENSMUSG00000024436	Mrps18b	ortholog_one2one	42.562	40.5512	75	11.95	0	0.0351422	54.46	53.23	55.98	54.5567	40.25	34.66	38.66	37.8567	10.1	26.76	9.26	15.3733	4.5	5.75	5.44	5.23	9.62626e-10	12.5094	12.8361	13.5471	12.3447	12.8093	13.4857	13.2232	14.8014	13.8083	14.5546	14.1881	14.0102	13.8943	14.7871	17.4325	16.5578	15.5039	15.6191	15.6325	10.6512	12.0117	10.7379
ENSDARG00000007080	rhcgl1	ENSMUSG00000030549	Rhcg	ortholog_one2many	60.0849	56.8273	0	0	0	0.365985	1.11	1.15	1.83	1.36333	0.78	0.56	0.8	0.713333	0.18	0	0	0.06	0.68	0	0.07	0.25	1	0	0	0	0	0	0	0	0	0	0	0	0	0	0	0	0	0	0	0	0	0	0
ENSDARG00000007081	pias4a	ENSMUSG00000004934	Pias4	ortholog_one2many	41.2371	39.4477	25	100	1	4.7357e-05	11.86	12.52	12.09	12.1567	4	4.37	4.19	4.18667	7.27	8.81	8.63	8.23667	4.13	2.93	4.31	3.79	8.45868e-05	6.33255	7.18306	6.77678	7.08331	6.84393	8.20405	7.67798	7.51171	8.09412	7.36073	7.81439	7.77716	4.4138	4.87566	5.06385	4.1587	4.39137	4.64615	4.59159	6.30851	6.05841	5.21285
ENSDARG00000007092	xab2	ENSMUSG00000019470	Xab2	ortholog_one2one	80.9636	80.5848	50	50.6	0	0.0510445	8.87	7.93	6.55	7.78333	4.96	5.9	4.73	5.19667	1.99	2.83	7.75	4.19	1.86	2.3	2.25	2.13667	1.12363e-07	18.0414	17.7256	17.9538	17.748	17.8672	26.3398	27.1814	28.6799	29.2305	28.1724	28.4474	28.0086	15.6283	16.4443	15.5904	16.0923	15.6635	15.4816	15.8167	18.1914	19.9054	19.9497
ENSDARG00000007097	her13	ENSMUSG00000067071	Hes6	ortholog_one2many	49.115	49.5536	0	0	0	0.000302476	0	0	0	0	0	0	0	0	0.41	0.58	0.31	0.433333	0	0	0.03	0.01	0.0188435	10.4664	11.8549	8.42413	10.8466	10.398	31.6412	30.4125	30.1243	31.2198	29.7911	29.6509	30.4733	20.5592	19.4752	21.2353	21.6515	19.818	20.2359	20.4959	14.0647	14.2063	12.4068
ENSDARG00000007098	itm2ba	ENSMUSG00000022108	Itm2b	ortholog_one2many	59.387	58.2707	25	4.68	0	3.22965e-05	897.47	911.9	926.95	912.107	1017.65	949.82	1028.83	998.767	292.19	424.7	163.11	293.333	218.17	183.41	204.01	201.863	8.0194e-13	2220.81	2222.9	2270.09	2248.98	2240.69	1170.54	1176.19	1207.96	1197.34	1229.65	1244.57	1204.37	2520.19	2513.93	2554.76	2565.54	2608.32	2585.52	2558.04	2586.89	2606.12	2603.08
ENSDARG00000007108	lipia	ENSMUSG00000044626	Liph	ortholog_many2many	46.2719	46.7849	25	1.3	0	1.23574e-06	0.24	0.47	0.63	0.446667	19.56	17.31	17.45	18.1067	0.54	0.05	0	0.196667	0.8	0.83	0.23	0.62	1.77959e-15	59.6068	59.8186	57.0202	58.6047	58.7626	38.116	37.902	39.9367	38.328	39.4693	39.228	38.83	18.9086	19.1724	18.9551	20.4227	19.262	19.2352	19.326	88.7781	86.8601	86.7098
ENSDARG00000007125	asb6	ENSMUSG00000039483	Asb6	ortholog_one2one	48.046	50	0	74.29	0	0.0198136	1.73	2.8	3.03	2.52	0.34	0.47	0.81	0.54	0.78	0.5	0	0.426667	0.79	0.65	0.68	0.706667	3.20558e-12	4.77146	4.69921	4.39014	4.61513	4.61899	5.41788	4.83917	5.1981	6.02588	4.81266	5.1202	5.23565	7.86704	8.62051	8.49366	7.21631	7.47802	8.43788	8.0189	6.02676	5.73952	4.88792
ENSDARG00000007127	acat2	ENSMUSG00000023832	Acat2	ortholog_one2many	73.4177	73.0479	50	44.42	0	0.0115842	47.56	49.4	51.56	49.5067	32.78	27.27	32.08	30.71	1.87	3.25	5.22	3.44667	31.6	102.87	112.89	82.4533	4.88584e-05	60.7824	58.8353	60.1399	56.2343	58.998	24.831	24.2431	24.7542	23.1671	25.9212	25.4905	24.7345	28.7441	29.9946	28.4658	28.9433	30.4106	27.3753	28.9889	38.2647	36.2691	34.9838
ENSDARG00000007129	slc6a16a	ENSMUSG00000070568	Slc6a21	ortholog_many2many	13.5642	22.2222	25	5.63	0	4.89942e-07	1.64	1.13	0.91	1.22667	0.16	0.22	0.17	0.183333	0.06	0.09	0.07	0.0733333	0.33	0.45	0.63	0.47	0.000471204	0	0	0	0	0	0	0	0	0	0	0	0	0	0	0	0	0	0	0	0	0	0
ENSDARG00000007130	mrto4	ENSMUSG00000028741	Mrto4	ortholog_one2one	71.0744	71.9665	25	100	1	0.00317369	26.23	25.56	27.72	26.5033	46.16	39.54	46.58	44.0933	9.83	24.11	22.14	18.6933	1.83	2.51	3.49	2.61	2.62173e-05	17.1525	15.3532	16.0322	17.7255	16.5659	9.13474	9.3486	8.90883	10.7541	9.7554	10.0945	9.66604	9.61041	9.99985	11.5962	11.1057	10.5499	10.1611	10.5039	12.7446	12.4101	10.6991
ENSDARG00000007135	cnot3a	ENSMUSG00000035632	Cnot3	ortholog_one2many	55.0499	66.0453	0	47.86	0	1.04864e-06	21.99	22.97	19.94	21.6333	9.91	9.23	8.95	9.36333	2.33	4.27	3.85	3.48333	3.38	3.39	3.59	3.45333	9.50417e-09	4.90933	4.71243	5.892	5.1524	5.16654	8.58031	8.12088	8.41317	8.95921	8.53582	8.07991	8.44822	7.54592	6.90552	6.7084	7.34473	6.93748	7.82851	7.21176	9.70264	11.1782	11.483
ENSDARG00000007136	sh3bp5lb	ENSMUSG00000013646	Sh3bp5l	ortholog_one2many	48	52.0408	0	26.25	0	2.08655e-05	2.05	1.97	1.67	1.89667	0.4	0.66	0.35	0.47	0.55	1.07	1.42	1.01333	1.35	1.07	1.19	1.20333	1.79475e-08	5.56101	4.94147	5.42985	5.51088	5.3608	5.15612	5.16926	4.97197	4.9938	4.99265	4.74438	5.0047	7.2964	7.10645	6.66676	6.58667	6.94524	6.39983	6.83356	4.95722	5.56775	5.75486
ENSDARG00000007141	psmc3	ENSMUSG00000002102	Psmc3	ortholog_one2one	98.7624	90.2715	0	51.31	0	8.80437e-05	54.25	58.06	53.54	55.2833	53.9	62.8	63.12	59.94	18.43	16.52	18.81	17.92	13	14.09	17.85	14.98	1.42347e-08	84.9954	81.3903	85.6365	84.8519	84.2185	72.9911	75.4033	73.3023	73.9974	68.9332	74.6998	73.2212	82.4244	84.0007	82.3359	86.3999	81.2265	87.3634	83.9585	81.7288	82.6082	78.7931
ENSDARG00000007149	nadl1.2	ENSMUSG00000031391	L1cam	ortholog_one2many	36.9369	39.0786	0	15.11	0	3.61738e-05	0.27	0.19	0.1	0.186667	0.54	0.57	0.55	0.553333	0	0	0	0	0.53	0.74	0.64	0.636667	0	0.429275	0.463844	0.575109	0.413728	0.470489	0.0470483	0.106409	0.0514805	0.117394	0.0685159	0.0812248	0.0786788	0.114696	0.125133	0.283238	0.22553	0.1611	0.17473	0.180738	5.90827	6.05076	5.73877
ENSDARG00000007151	kcnk2b	ENSMUSG00000037624	Kcnk2	ortholog_one2many	70.3125	63.3803	25	5.29	0	1	0	0	0	0	0	0	0	0	0	0	0	0	0	0	0	0	0	0.38283	0.399145	0.417465	0.416574	0.404004	0.122377	0.0878671	0.3252	0.1551	0.122206	0.140849	0.158933	0.492489	0.539373	0.463087	0.251412	0.500669	0.541059	0.464682	8.94249	9.67302	9.53824
ENSDARG00000007169	itgb1bp1	ENSMUSG00000062352	Itgb1bp1	ortholog_one2one	77.2727	76.5	75	100	1	1.04282e-05	50.98	50.5	44.16	48.5467	27.98	31.31	33.33	30.8733	0.9	2.2	2.81	1.97	2.37	3.38	2.56	2.77	3.31766e-08	22.8737	23.5206	23.6412	25.0079	23.7609	12.7243	13.4444	12.414	12.6969	13.0053	13.0577	12.8904	9.38835	10.3811	9.80633	10.197	10.044	9.9537	9.96176	11.2762	10.3518	10.3505
ENSDARG00000007171	aig1	ENSMUSG00000019806	Aig1	ortholog_one2one	58.9655	65.2672	100	97.58	1	2.49136e-05	20.99	15	15.95	17.3133	0.06	0.13	0	0.0633333	0.62	0.63	0	0.416667	0.02	0.00901	0.05	0.0263367	7.05279e-09	17.5499	16.7737	16.2739	16.9962	16.8984	15.6086	15.9071	15.9788	15.2148	15.0972	14.2116	15.3364	9.96777	9.96731	10.5111	9.82003	8.9979	9.15526	9.73656	12.7567	12.4936	12.7158
ENSDARG00000007172	plxna3	ENSMUSG00000031398	Plxna3	ortholog_one2one	72.5687	73.344	0	46.71	0	0.100638	0.12	0.29	0.27	0.226667	1.81	2.13	1.52	1.82	0.39	0.07	0.24	0.233333	0.33	0.34	0.01	0.226667	0	0.297321	0.193473	0.211989	0.286197	0.247245	0.647023	0.540153	0.767973	0.705367	0.715473	0.820417	0.699401	1.37831	0.991687	1.22797	1.0908	0.98315	1.15395	1.13765	0.642885	0.702052	0.434901
ENSDARG00000007175	recql	ENSMUSG00000030243	Recql	ortholog_one2one	55.8685	55.0926	0	37.86	0	3.89049e-07	6.5	6.81	7.15	6.82	0.88	1.63	1.78	1.43	2.18	3.32	3.34	2.94667	0.78	0.73	1.05	0.853333	2.144e-07	3.59834	2.6013	3.57879	2.86967	3.16203	3.06862	2.20327	2.90263	3.09138	3.54885	3.44125	3.04267	2.6306	3.7549	2.67968	3.03085	2.7292	2.36554	2.86513	2.55824	3.26383	3.76872
ENSDARG00000007179	sash1a	ENSMUSG00000015305	Sash1	ortholog_one2many	57.3825	55.6098	75	1.63	1	3.69657e-07	0.09	0.15	0.12	0.12	2.12	1.86	1.89	1.95667	3.55	3.64	3.08	3.42333	0.37	0.8	0.39	0.52	0.00827954	0.225811	0.224732	0.19152	0.313968	0.239008	0.830113	0.689312	0.69769	0.907228	0.67277	0.789254	0.764395	0.938514	0.857533	0.854628	1.08131	0.883812	0.908488	0.920714	1.09247	1.26529	1.06986
ENSDARG00000007180	slc30a4	ENSMUSG00000005802	Slc30a4	ortholog_one2one	53.6232	43.0233	50	80.92	1	0.00335083	9.65	11.84	11.23	10.9067	3.54	3.12	3.86	3.50667	3.75	5.36	2.55	3.88667	10.78	8.14	7.43	8.78333	6.04471e-11	2.72864	2.27392	2.63493	2.7724	2.60247	1.24532	1.67963	1.2764	1.36354	1.39574	1.01601	1.32944	1.89582	2.39816	2.12574	1.94578	2.21796	2.1661	2.12493	4.45744	4.16275	5.03901
ENSDARG00000007181	nadk2	ENSMUSG00000022253	Nadk2	ortholog_one2one	67.2093	63.9381	50	79.46	1	0.000216777	14.46	18.06	16	16.1733	6.52	7.06	6.66	6.74667	3.36	2.63	4.21	3.4	2.12	2.25	2.08	2.15	0.025922	5.59953	5.44895	5.90259	6.16079	5.77796	9.08909	8.41665	9.37951	9.57224	10.3574	11.0104	9.63754	9.11517	11.2142	10.3928	11.2975	11.5649	9.92225	10.5845	8.45865	8.9808	9.70374
ENSDARG00000007184	zbtb16a	ENSMUSG00000066687	Zbtb16	ortholog_one2one	78.0597	77.7117	0	100	1	1.85939e-05	2.36	2.62	2.84	2.60667	21.37	26.86	21.14	23.1233	1.21	2.47	7.11	3.59667	28.07	28.22	26.44	27.5767	0.000547336	0.106013	0.105507	0.0963366	0.0769048	0.0961902	0.0169443	0	0	0	0	0	0.00282405	0.0917939	0.144212	0.102007	0.0609181	0.210981	0.146833	0.126124	0.350583	0.484259	0.203626
ENSDARG00000007186	ppp1r8a	ENSMUSG00000028882	Ppp1r8	ortholog_one2many	71.3467	70.9402	0	47.87	0	1.40159e-05	1.51	1.79	1.2	1.5	0.51	0.77	0.33	0.536667	0.42	0.54	0.81	0.59	0.17	0.2	0.2	0.19	0.00106889	3.57485	3.80315	3.76385	3.75581	3.72442	3.60559	3.98084	3.36317	3.6052	3.30541	3.57157	3.57196	3.9386	4.24462	4.05657	4.71053	5.00467	3.29276	4.20796	5.26555	4.96647	4.93674
ENSDARG00000007195	grm2b	ENSMUSG00000023192	Grm2	ortholog_one2many	69.5652	69.7248	25	41.11	0	0.00583107	0	0	0	0	0	0	0	0	0	0	0	0	0	0	0	0	0.000401467	0.184125	0.366492	0.401567	0.280497	0.30817	0.0706301	0.0887469	0.289814	0.137072	0.0411431	0.345488	0.162149	0	0	0	0	0	0	0	0	0	0
ENSDARG00000007196	rae1	ENSMUSG00000027509	Rae1	ortholog_one2one	91.5761	91.5761	0	99.96	1	0.00261859	23.29	20.93	19.5	21.24	29.15	29.4	30.86	29.8033	9.37	9.71	17.69	12.2567	3.25	3.68	3.87	3.6	7.57161e-10	25.2621	25.7384	27.3937	24.8397	25.8085	22.3315	24.4203	23.2875	23.0013	22.6662	23.2488	23.1593	32.4808	32.5409	29.2913	29.6004	32.9036	31.5824	31.3999	20.8465	19.0306	18.9075
ENSDARG00000007198	mta1	ENSMUSG00000021144	Mta1	ortholog_one2one	80.1626	70.128	0	29.59	0	2.8875e-05	11.13	10.17	8.82	10.04	7.85	7.48	6.65	7.32667	2.26	2.51	0.88	1.88333	1.02	1.43	0.99	1.14667	0.192455	1.36444	1.53127	1.48788	1.8006	1.54605	1.16929	1.20336	1.21851	1.11146	0.778432	0.993317	1.07906	3.07675	2.84336	2.68163	2.36882	2.53055	2.8261	2.7212	3.90416	4.77394	5.11885
ENSDARG00000007207	cnpy2	ENSMUSG00000025381	Cnpy2	ortholog_one2one	63.587	64.2857	0	8.29	0	4.31811e-05	3.58	3.25	2.12	2.98333	2.32	3.04	2.66	2.67333	1.83	1.98	1.37	1.72667	0.21	0.21	0.25	0.223333	2.61796e-10	117.756	118.075	128.699	118.879	120.852	139.693	136.747	130.167	135.598	138.493	134.569	135.878	176.396	178.266	175.151	181.766	159.126	158.942	171.608	157.544	161.248	156.948
ENSDARG00000007216	abce1	ENSMUSG00000058355	Abce1	ortholog_one2one	90.1503	90.1503	25	100	1	9.09024e-05	26.21	26.51	24.28	25.6667	31.63	35.16	33.04	33.2767	14.91	18.93	14.23	16.0233	17.74	11.34	20.18	16.42	0.00011946	10.3134	10.5339	9.50823	9.38387	9.93485	8.62172	8.6512	9.36702	8.88313	10.4898	10.3806	9.39891	9.55676	9.10733	8.04328	8.13391	9.25062	9.36745	8.90989	6.88805	5.67952	6.37461
ENSDARG00000007217	wdr55	ENSMUSG00000042660	Wdr55	ortholog_one2one	60.6218	60.3093	0	91.49	1	0.000520659	1.33	1.3	1.17	1.26667	5.2	5.8	5.45	5.48333	3.35	5.56	3.83	4.24667	0.75	1.14	0.93	0.94	0.0160553	5.05295	4.43015	5.4445	5.36742	5.07376	5.99951	3.88517	6.05971	5.3738	5.71266	6.44032	5.57853	7.50038	8.1011	7.22358	7.95026	8.3322	8.49826	7.9343	3.97858	3.03357	5.19939
ENSDARG00000007219	actn1	ENSMUSG00000015143	Actn1	ortholog_one2one	91.9069	92.9372	25	30.91	0	5.64086e-07	1.52	0.98	1.17	1.22333	4.19	4.07	4.76	4.34	2.42	3.92	3.19	3.17667	2.46	2.3	1.92	2.22667	0.334709	1.44462	1.55556	1.42036	1.34002	1.44014	3.4521	3.40156	4.37371	3.50085	3.70429	4.23456	3.77785	2.33767	2.87524	2.4337	2.28623	2.31885	2.58659	2.47305	5.22113	4.85506	5.75878
ENSDARG00000007220	ncam1b	ENSMUSG00000039542	Ncam1	ortholog_one2many	47.8177	58.0683	0	0.62	0	1.19585e-06	39.96	37.07	36.61	37.88	0.61	0.3	0.64	0.516667	0	0.05	0.17	0.0733333	0.00399	0.02	0	0.00799667	3.43747e-15	0.0788964	0.0785196	0.122906	0.0858505	0.0915432	0.497202	0.499789	0.591349	0.623302	0.528886	0.559811	0.550057	0.304487	0.344973	0.273295	0.220204	0.255711	0.200709	0.266563	0.273334	0.271839	0.363699
ENSDARG00000007221	pbk	ENSMUSG00000022033	Pbk	ortholog_one2one	61.3569	63.0303	50	33.23	0	0.0104062	0	0	0	0	0	0.02	0	0.00666667	3.43	1.45	4.66	3.18	0.1	0.42	0.15	0.223333	0.00136889	0	0	0	0	0	0	0	0	0	0	0	0	1.56834	1.64262	2.1495	1.56122	1.62212	1.43354	1.66289	0.665541	0.827376	0.521855
ENSDARG00000007231	ryk	ENSMUSG00000032547	Ryk	ortholog_one2one	72.4684	77.1044	50	82.7	1	4.58415e-05	1.92	1.34	1.79	1.68333	4.78	5.79	4.74	5.10333	0.36	0.4	0.06	0.273333	2.7	3.8	2.26	2.92	6.08338e-11	5.94248	5.36027	5.48316	5.19031	5.49405	8.02407	7.85506	8.05004	8.96186	8.0604	8.2481	8.19992	10.1394	9.42873	9.68416	9.57035	11.3913	10.3816	10.0993	11.1294	10.1534	11.3148
ENSDARG00000007241	mycb	ENSMUSG00000049086	Bmyc	ortholog_many2many	15.1589	36.4706	50	87.9	1	3.37916e-06	125.28	132.8	124.26	127.447	9.52	10.15	9.81	9.82667	3.41	3.91	4.74	4.02	60.43	44.79	56.38	53.8667	0.000102537	12.742	28.0081	14.8944	28.4286	21.0183	31.2082	66.2758	30.7814	27.7847	30.111	29.3422	35.9172	27.8127	14.777	31.3306	14.7492	25.8328	27.86	23.7271	29.9107	13.2656	14.2621
ENSDARG00000007244	acp2	ENSMUSG00000002103	Acp2	ortholog_one2one	54.5226	51.3002	0	60.2	0	0.00458636	29.52	21.67	21.44	24.21	13.44	15.56	14.44	14.48	10.09	12.33	18.21	13.5433	13.94	14.19	13.24	13.79	4.12197e-09	17.3932	19.0394	16.6741	17.3002	17.6017	18.5629	20.1837	18.306	18.8487	18.5591	18.0086	18.7448	19.8417	18.5785	19.9227	19.1505	19.6071	21.474	19.7624	18.1387	16.0775	16.7208
ENSDARG00000007245	rundc3aa	ENSMUSG00000006575	Rundc3a	ortholog_one2many	73.1308	70.1794	0	55.33	0	0.000195499	1.36	1.79	1.82	1.65667	2.09	1.6	1.65	1.78	0.19	0.29	0	0.16	0.04	0.02	0.05	0.0366667	3.43747e-15	32.0796	34.2744	29.8365	31.2731	31.8659	21.8611	21.0297	21.5092	21.832	19.1701	19.7499	20.8587	1.68731	1.68803	1.41513	0.915532	1.68297	1.63686	1.50431	10.4364	10.7825	10.2401
ENSDARG00000007247	ric8a	ENSMUSG00000025485	Ric8a	ortholog_one2one	57.8182	60	25	57.32	0	0.00152732	16.29	14.22	17.37	15.96	0.14	0.1	0.25	0.163333	0.72	0.08	0.42	0.406667	1.21	3.05	1.5	1.92	1.49425e-06	14.2096	15.291	14.7833	14.3147	14.6496	14.9109	13.246	14.3486	14.0794	13.7627	13.0236	13.8952	14.6253	13.5239	13.2765	13.0028	12.9304	12.9153	13.379	8.63436	9.65135	9.31633
ENSDARG00000007250	use1	ENSMUSG00000002395	Use1	ortholog_one2one	65.9004	60.5634	0	56.61	0	0.00143155	7.33	7.38	9.2	7.97	6.14	5.68	5.71	5.84333	3.79	3.58	1.73	3.03333	1.51	1.59	1.59	1.56333	1.47751e-08	29.2462	31.7933	31.2676	33.6934	31.5001	20.2801	22.2388	20.9458	20.837	20.5193	20.8581	20.9465	26.0531	26.9588	28.763	27.8763	25.0074	26.8538	26.9187	29.1278	28.0268	28.5668
ENSDARG00000007257	rab5ab	ENSMUSG00000017831	Rab5a	ortholog_one2many	93.0556	93.4884	50	100	1	0.00559598	66.84	66.34	63.71	65.63	36.48	36.63	37.92	37.01	8.38	14.31	26.97	16.5533	8.33	7.7	7.89	7.97333	1.44879e-06	89.1934	88.8816	88.0493	91.5222	89.4116	55.9119	58.9668	59.6947	57.9794	67.1893	62.9589	60.4502	78.2566	78.7515	79.9006	77.0225	79.7073	80.3357	78.9957	64.4373	64.6297	66.7067
ENSDARG00000007264	nipsnap2	ENSMUSG00000029432	Nipsnap2	ortholog_one2one	73.7762	75.089	25	89.17	1	6.39083e-05	299.73	321.72	282.06	301.17	134.68	141.26	141.78	139.24	11.96	9.5	8.55	10.0033	7.29	7.84	6.03	7.05333	0	26.7384	27.9151	31.1584	29.9153	28.9318	32.021	32.6614	32.5963	33.3149	33.8642	32.2612	32.7865	24.2076	26.2768	24.7822	24.9676	24.3764	26.5306	25.1902	31.0277	32.7979	31.6834
ENSDARG00000007271	mynn	ENSMUSG00000037730	Mynn	ortholog_one2one	30.198	40	50	36.43	0	4.837e-05	10.26	11.38	10	10.5467	8.66	8.52	8.35	8.51	1.47	1.65	3.09	2.07	0.98	1.23	1.12	1.11	3.66672e-07	15.2493	15.5451	15.6807	15.5947	15.5174	8.75587	9.17396	9.6821	9.88125	10.0209	9.91754	9.57194	5.33737	6.01292	5.26186	5.14473	5.15313	5.6586	5.4281	7.20672	7.27322	6.95915
ENSDARG00000007277	myf5	ENSMUSG00000000435	Myf5	ortholog_one2one	58.6498	54.5098	75	95.19	1	0.588267	0	0	0	0	0	0	0	0	0.51	0	0	0.17	0.02	0.05	0.04	0.0366667	0.00325386	0	0	0	0	0	0	0	0	0	0	0	0	0	0	0	0	0	0	0	0	0	0
ENSDARG00000007278	ect2	ENSMUSG00000027699	Ect2	ortholog_one2one	62.1926	66.4841	25	58.99	0	0.0336797	0	0.06	0.06	0.04	0.14	0.1	0.08	0.106667	0.48	0.21	0.65	0.446667	0.02	0.07	0.01	0.0333333	0.054518	0.351343	0.366315	0.273663	0.273079	0.3161	0.192535	0.32256	0.421345	0.409237	0.672926	0.295462	0.385677	0.79966	0.699841	0.869315	1.0383	0.779134	1.07256	0.876469	0.811476	0.586937	0.539877
ENSDARG00000007279	yipf5	ENSMUSG00000024487	Yipf5	ortholog_one2one	79.3774	79.3774	50	92.42	1	1.83578e-05	56.53	56.46	58.83	57.2733	27.48	27.13	28.21	27.6067	7.94	10.52	15	11.1533	12.43	9.58	11.27	11.0933	1.3792e-07	35.673	36.6963	37.7189	39.9961	37.5211	36.993	37.2973	36.8239	36.2099	36.4409	37.0679	36.8055	28.9452	32.0135	30.9596	30.6369	32.7098	31.9235	31.1981	40.6455	38.3872	39.2834
ENSDARG00000007285	mrpl57	ENSMUSG00000021967	Mrpl57	ortholog_one2one	60.1942	60.7843	0	95.54	1	0.000512325	56.2	61.72	56.05	57.99	55.86	62.11	66.18	61.3833	6.14	11	14.41	10.5167	2.77	3.15	3.46	3.12667	1.15024e-09	18.4803	18.2375	19.3478	18.7996	18.7163	16.5683	18.2638	16.4588	16.4332	15.9626	17.6551	16.8903	14.9259	16.3986	17.6177	17.803	14.835	15.2102	16.1317	14.8506	14.2586	13.7362
ENSDARG00000007289	METRNL (1 of many)	ENSMUSG00000039208	Metrnl	ortholog_one2many	53.1469	48.8746	25	0	0	0.00257379	0	0.02	0	0.00666667	0.86	0.88	0.92	0.886667	0.1	0.04	0.09	0.0766667	0.1	0.08	0.15	0.11	0	29.0901	31.2129	29.2436	29.4284	29.7437	25.7177	27.7137	24.0267	24.8343	24.4393	26.1505	25.4804	110.396	112.34	109.033	105.193	101.766	102.257	106.831	53.3612	52.2596	49.3709
ENSDARG00000007294	aco2	ENSMUSG00000022477	Aco2	ortholog_one2one	82.1519	83.2051	75	68.26	1	4.74732e-05	73.17	74.11	72.9	73.3933	43.67	44.23	42.47	43.4567	9.2	19.9	25.86	18.32	28.21	24.25	27.15	26.5367	5.00585e-05	75.5478	75.141	73.9752	72.8096	74.3684	74.7147	71.8894	74.659	76.6267	71.2139	74.0582	73.8603	68.2978	66.4003	63.1181	64.2598	65.1353	66.078	65.5482	61.8145	60.8165	62.5443
ENSDARG00000007302	sh3gl3b	ENSMUSG00000030638	Sh3gl3	ortholog_one2many	56.9948	63.4006	0	45.18	0	0.000820436	0.29	0.65	1.7	0.88	67.94	57.63	64.96	63.51	0	0	0	0	2.09	1.35	1.22	1.55333	1.94613e-10	4.444	4.21514	4.89155	4.63138	4.54552	167.009	166.43	172.978	168.966	173.359	176.214	170.826	2.01611	1.78804	1.2768	1.39072	1.59445	1.90723	1.66223	5.63472	5.03207	5.86691
ENSDARG00000007315	tmpoa	ENSMUSG00000019961	Tmpo	ortholog_one2many	24.0487	22.7994	25	86.99	0	5.2303e-05	4.37	3.26	3.15	3.59333	12.2	12.34	11.38	11.9733	1.64	0.46	0.25	0.783333	0.45	0.55	0.47	0.49	0.000988582	4.187	3.65478	3.73152	4.02628	3.8999	6.45652	6.10123	7.06475	6.50917	6.79159	6.58664	6.58498	6.89432	6.8405	7.29199	7.06605	6.16235	6.24232	6.74959	5.0908	4.72746	5.94752
ENSDARG00000007320	rpl7	ENSMUSG00000043716	Rpl7	ortholog_one2one	79.2683	72.2222	50	24.48	0	4.15487e-05	156.69	161.04	149.83	155.853	554.25	664.3	590.09	602.88	443.71	303.14	252.31	333.053	804.09	718.26	775.31	765.887	0.83152	37.3255	37.214	39.1664	40.7249	38.6077	28.8482	30.7763	31.777	30.6365	31.6982	30.9817	30.7863	54.8468	54.7437	57.6578	57.6194	60.9882	55.7385	56.9324	40.2947	39.8905	38.6487
ENSDARG00000007323	chmp4bb	ENSMUSG00000038467	Chmp4b	ortholog_one2many	82.2727	80.8036	0	60.61	0	0.000105416	173.49	162.11	171.77	169.123	95.19	90.4	89.61	91.7333	51.04	55.33	49.74	52.0367	13.54	14.3	13.04	13.6267	0.271731	3.42306	3.22974	3.92666	3.38616	3.49141	4.6043	3.59975	3.452	4.44414	3.27809	3.7782	3.85941	3.32577	3.80985	4.61976	3.8318	3.71585	3.79991	3.85049	8.42876	7.16426	6.81398
ENSDARG00000007344	tcap	ENSMUSG00000007877	Tcap	ortholog_one2one	35.7542	38.3234	0	0	0	0.000702608	0.73	0.67	0.85	0.75	17.06	19.58	16.38	17.6733	0	0	0	0	0.02	0.04	0	0.02	0	6.55871	6.90579	6.63381	6.72308	6.70535	52.1413	43.7992	40.6953	46.0967	38.2319	41.1268	43.6819	159.013	170.778	171.437	161.677	156.633	159.903	163.24	221.611	209.04	207.26
ENSDARG00000007347	degs1	ENSMUSG00000038768	9130409I23Rik	ortholog_one2many	61.9195	62.5	25	85.37	1	0.0052302	178.15	178.89	167.15	174.73	46.86	50.33	47.93	48.3733	29.08	43.89	72.48	48.4833	14.82	19.17	18.18	17.39	0.0119253	0	0	0	0	0	0	0	0	0	0	0	0	0	0	0	0	0	0	0	0	0	0
ENSDARG00000007349	dmrt1	ENSMUSG00000024837	Dmrt1	ortholog_one2one	50.3731	36.0963	75	50.35	1	0.678236	0	0	0	0	0.38	0.22	0.35	0.316667	0	0	0	0	0.04	0.06	0.00566	0.03522	0.00325386	0	0	0	0	0	0	0	0	0	0	0	0	0	0	0	0	0	0	0	0	0	0
ENSDARG00000007356	fgf20a	ENSMUSG00000031603	Fgf20	ortholog_one2many	75.4808	74.4076	75	0	1	8.8014e-07	6.6	4.8	4.38	5.26	1.5	1.03	1.98	1.50333	0	0	0.22	0.0733333	0	0	0	0	1	0	0	0	0	0	0	0	0	0	0	0	0	0	0	0	0	0	0	0	0	0	0
ENSDARG00000007358	cxcr3.1	ENSMUSG00000050232	Cxcr3	ortholog_one2one	39.782	39.782	0	0	0	0.550856	0	0	0	0	0	0	0	0	0	0	0	0	0	0	0	0	9.94319e-08	0	0	0	0	0	0	0	0	0	0	0	0	0	0	0	0	0	0	0	0	0	0
ENSDARG00000007359	UBL4B	ENSMUSG00000055891	Ubl4b	ortholog_one2many	37.5796	31.383	0	0	0	0.000989562	44.86	42.31	45.96	44.3767	17.37	19.07	16.61	17.6833	10.66	13.7	6.35	10.2367	3.54	3.38	2.55	3.15667	1	0	0	0	0	0	0	0	0	0	0	0	0	0	0	0	0	0	0	0	0	0	0
ENSDARG00000007362	sft2d1	ENSMUSG00000073468	Sft2d1	ortholog_one2many	73.913	74.8428	25	54.87	0	1.75535e-06	10.76	11.26	11.95	11.3233	16.12	15.38	17.41	16.3033	26.21	33.87	27.68	29.2533	4.61	4.5	4.11	4.40667	1.36953e-05	4.30418	8.54221	4.06228	9.17541	6.52102	5.50359	11.7196	5.09761	5.08609	5.56818	5.33416	6.38486	16.0844	6.57414	14.2121	6.59549	15.6291	15.8375	12.4888	13.9287	6.31917	6.64286
ENSDARG00000007366	AMDHD1	ENSMUSG00000015890	Amdhd1	ortholog_one2one	70.2079	71.3615	50	100	1	7.66923e-10	0.6	0.46	1.14	0.733333	0.11	0.05	0.13	0.0966667	0.1	0.31	0	0.136667	53.31	57.45	60.19	56.9833	4.97849e-07	0	0	0	0	0	0	0	0	0	0	0	0	0.038674	0.0379741	0	0	0.133334	0.0883752	0.0497262	0.0410293	0.204025	0.0857903
ENSDARG00000007369	tcf7l1b	ENSMUSG00000055799	Tcf7l1	ortholog_one2many	73.2727	67.2788	0	0	0	3.3656e-06	1.83	0.73	1.31	1.29	1.75	0.93	1.51	1.39667	0.22	0.19	0.27	0.226667	0.95	0.41	0.33	0.563333	0	1.76823	1.91977	1.55258	1.87411	1.77867	1.36539	1.90378	1.66269	1.80724	1.8986	1.90099	1.75645	8.54217	8.45785	8.35242	8.15501	7.95211	8.86032	8.38665	6.98665	6.41976	6.828
ENSDARG00000007370	dysf	ENSMUSG00000033788	Dysf	ortholog_one2one	67.4297	67.3333	50	20.14	0	0.00331807	0.98	1	0.99	0.99	0.58	0.44	0.49	0.503333	0.04	0	0	0.0133333	0.78	0.5	0.76	0.68	6.30553e-14	0.562653	0.732263	0.648953	0.529828	0.618424	0.90276	0.897026	0.772077	0.782495	0.676984	0.63297	0.777385	3.00182	3.1462	2.67365	2.51192	2.32566	2.71042	2.72828	1.76527	1.70816	1.8206
ENSDARG00000007371	slc26a3.1	ENSMUSG00000001225	Slc26a3	ortholog_one2many	54.2282	53.3686	50	44.7	0	0.0823894	0	0	0	0	0	0	0	0	0	0.04	0	0.0133333	0.64	1.02	0.12	0.593333	0.00378731	0	0	0	0	0	0	0	0	0	0	0	0	0	0	0	0	0	0	0	0	0	0
ENSDARG00000007377	odc1	ENSMUSG00000011179	Odc1	ortholog_one2one	73.9696	73.9696	50	88.39	1	0.00163409	16.18	15.83	15.87	15.96	11.63	13.75	11.5	12.2933	18.26	33.81	40.48	30.85	0.92	0.96	1.18	1.02	4.11695e-13	90.111	92.4623	87.6538	88.9296	89.7892	58.8999	62.1734	58.6571	60.4645	61.189	56.466	59.6417	468.002	460.145	454.344	463.563	474.337	471.468	465.31	145.469	137.614	143.032
ENSDARG00000007382	ubtd1a	ENSMUSG00000025171	Ubtd1	ortholog_one2many	70.9251	70.9251	25	0	0	0.142463	0.27	0.2	0.12	0.196667	0	0	0	0	0.04	0	0.14	0.06	0.05	0.11	0.05	0.07	4.80544e-08	46.4423	47.4538	47.7481	45.5272	46.7928	35.9359	35.554	33.0051	35.7725	32.3723	36.8659	34.9176	20.9701	22.9989	19.692	20.5494	22.9717	19.406	21.098	11.4489	11.9685	11.6975
ENSDARG00000007383	kcnk6	ENSMUSG00000046410	Kcnk6	ortholog_one2one	47.5309	49.2013	0	3.64	0	3.21731e-07	0	0.01	0.05	0.02	0.46	0.45	0.3	0.403333	0.15	0.24	0.14	0.176667	10.3	9.75	8.85	9.63333	0.000396239	0.303916	0.410487	0.307739	0.236217	0.31459	0.353908	0.313896	0.159455	0.20778	0.363806	0.359407	0.293042	0.0451119	0	0.0250656	0	0.0259215	0.0257717	0.0203118	0.382874	0.404579	0.400286
ENSDARG00000007385	cct7	ENSMUSG00000030007	Cct7	ortholog_one2one	87.7514	88.2353	0	29.19	0	2.20593e-05	115.61	117.84	109.87	114.44	63.27	66.69	66.43	65.4633	29.18	34.72	38.01	33.97	25.99	28.89	40.55	31.81	6.45821e-06	267.662	269.46	260.301	266.537	265.99	156.659	158.689	154.824	154.966	154.285	149.902	154.888	96.0306	94.5375	94.7271	92.3184	97.8543	96.8966	95.3941	110.016	110.73	108.898
ENSDARG00000007387	irf2a	ENSMUSG00000031627	Irf2	ortholog_one2many	45.1613	44.1261	25	25.9	0	6.52565e-05	14.39	12.81	12.77	13.3233	10.33	9.2	10.94	10.1567	8.6	12.22	12.4	11.0733	1.7	1.4	1.21	1.43667	0.00192654	2.42126	2.23581	2.39534	1.84699	2.22485	2.2741	2.79124	2.67169	2.68119	2.14741	2.2592	2.47081	5.83565	6.0611	5.90851	5.07763	6.67659	5.74896	5.88474	4.73271	5.19941	5.35068
ENSDARG00000007396	rnd3b	ENSMUSG00000017144	Rnd3	ortholog_one2many	78.125	71.7213	0	1.23	0	0.131541	2.72	2.61	2.32	2.55	133.53	141.82	139.41	138.253	1.22	10.75	4.29	5.42	1.4	2.61	1.04	1.68333	5.08686e-08	8.21409	7.64876	7.73779	7.96464	7.89132	22.6179	21.2656	23.2765	22.2283	22.1708	24.102	22.6102	25.3933	25.3901	24.7911	25.1425	27.8469	28.3376	26.1502	13.4699	13.3739	13.4263
ENSDARG00000007398	lrrk1	ENSMUSG00000015133	Lrrk1	ortholog_one2one	60.8569	41.6087	100	36.02	1	6.20445e-09	0	0.02	0.02	0.0133333	0.01	0.04	0.1	0.05	0.93	1	0.91	0.946667	0.27	0.18	0.07	0.173333	2.31827e-10	0.340965	0.27843	0.409947	0.409072	0.359604	2.7584	2.51149	2.59625	2.42673	2.61778	2.71158	2.60371	2.43454	2.47967	2.36219	2.52195	2.14011	2.57404	2.41875	1.86001	1.51437	2.05542
ENSDARG00000007405	strap	ENSMUSG00000030224	Strap	ortholog_one2one	81.459	76.5714	0	57.24	0	0.00210147	22.32	23.72	24.81	23.6167	24.95	25.61	25.39	25.3167	6.03	8.79	12.65	9.15667	7.21	7.51	8.66	7.79333	7.85794e-08	25.2252	25.9174	25.3449	27.1948	25.9206	22.8765	23.1922	23.6851	26.3928	24.9901	25.2029	24.3899	39.6336	42.1295	40.5751	42.0276	42.0303	42.6874	41.5139	37.7397	35.8069	33.3729
ENSDARG00000007406	phox2a	ENSMUSG00000007946	Phox2a	ortholog_one2one	66.4286	66.4286	50	55.45	0	0.550856	0	0	0	0	0.12	0.05	0.1	0.09	0	0	0	0	0.03	0	0.00504	0.01168	0.687818	0	0	0	0	0	0	0	0	0	0	0	0	0	0	0	0.0643634	0	0	0.0107272	0	0	0
ENSDARG00000007407	barx1	ENSMUSG00000021381	Barx1	ortholog_one2one	68.1452	66.5354	75	93.1	1	0.550856	0	0.03	0.07	0.0333333	0	0	0	0	0	0	0	0	0.03	0	0.01	0.0133333	0.118032	0	0	0	0	0	0	0	0	0	0	0	0	0	0	0	0	0	0	0	0	0	0
ENSDARG00000007412	slc2a1b	ENSMUSG00000028645	Slc2a1	ortholog_one2many	79.5501	79.065	0	17.08	0	4.50938e-06	19.66	18.34	17.92	18.64	5.15	5.58	4.61	5.11333	5.93	7.11	5.75	6.26333	1.59	0.75	1.03	1.12333	7.34029e-09	11.4631	11.5106	11.7994	10.5996	11.3432	26.5706	26.2628	25.9451	26.7052	26.4759	25.9855	26.3242	23.7947	25.2258	22.1983	24.1622	24.0919	23.8306	23.8839	19.8041	19.2731	18.2165
ENSDARG00000007413	arid2	ENSMUSG00000033237	Arid2	ortholog_one2one	62.659	53.884	50	51.25	0	0.00019534	0.96	0.71	0.61	0.76	0.99	0.96	1.02	0.99	0.64	0.63	0.75	0.673333	1.49	1.29	1.45	1.41	1.29705e-05	1.37638	1.3364	1.22635	1.24199	1.29528	1.63383	1.6666	1.68207	1.61551	1.95035	1.85266	1.7335	1.69174	1.41281	1.13379	1.37927	1.51324	1.54434	1.44586	2.63664	2.48421	2.88228
ENSDARG00000007418	chmp4c	ENSMUSG00000027536	Chmp4c	ortholog_one2one	59.8326	61.6379	25	41.2	0	4.4726e-05	7.5	7.53	7.31	7.44667	10.38	9.1	10.5	9.99333	0.07	0	0	0.0233333	1.17	0.75	0.16	0.693333	1.75677e-07	1.15241	1.15579	1.32486	1.28314	1.22905	1.31933	1.14535	1.17176	1.25408	1.20769	1.27197	1.22836	1.71721	1.72259	2.04237	1.74535	1.86677	1.79234	1.81444	2.7967	2.74223	2.61502
ENSDARG00000007421	ftcd	ENSMUSG00000001155	Ftcd	ortholog_one2one	65.8182	66.9131	0	84.58	1	9.07532e-05	0.06	0.08	0.18	0.106667	0.07	0.12	0.14	0.11	0	0	0	0	471.13	290.41	370.78	377.44	0.000540837	0	0	0	0	0	0	0	0	0	0	0	0	0	0	0	0	0	0	0	0	0	0
ENSDARG00000007425	apol1	ENSMUSG00000090698	Apold1	ortholog_one2many	12.4731	23.5772	25	0	0	0.000661529	0	0	0	0	38.92	35.38	36.92	37.0733	8.88	7.58	5.7	7.38667	11.92	9.61	6.48	9.33667	2.32932e-13	1.9452	2.41361	1.98345	2.08917	2.10786	2.15616	2.14302	1.85561	2.17618	1.89105	2.0076	2.03827	3.30736	3.65988	3.79203	3.86139	3.37854	3.41898	3.5697	2.33919	1.96636	2.00886
ENSDARG00000007429	ndor1	ENSMUSG00000006471	Ndor1	ortholog_one2one	59.3277	59.0301	0	66.21	0	0.000685893	12.47	12.65	12.92	12.68	12.6	13.19	12.18	12.6567	3.69	4.76	3.85	4.1	1.55	1.14	1.42	1.37	6.96578e-10	3.11952	3.39664	3.57015	3.04159	3.28198	5.37601	4.98713	4.52122	4.89428	4.62408	5.07952	4.91371	6.69128	7.29495	6.57986	7.59623	5.95628	7.16854	6.88119	4.11968	4.67278	3.96887
ENSDARG00000007430	prdm12b	ENSMUSG00000079466	Prdm12	ortholog_one2one	76.776	76.9863	0	69.14	0	0.550856	0.11	0.18	0.18	0.156667	0	0.03	0	0.01	0	0.05	0	0.0166667	0.03	0.02	0.00983	0.0199433	4.60405e-13	19.6924	20.1428	17.4576	19.9599	19.3132	0.17486	0.105462	0.1148	0.155132	0.081487	0.0805017	0.118707	0.26524	0.0372057	0.0421074	0	0.0435453	0.259761	0.107977	18.0896	19.4699	17.5674
ENSDARG00000007436	avpr2aa	ENSMUSG00000031390	Avpr2	ortholog_one2many	35.3497	50.4043	0	0	0	0.00328721	0.11	0.08	0.03	0.0733333	0	0	0	0	0	0	0	0	0.01	0	0	0.00333333	0.372854	0	0	0.0340483	0	0.00851207	0.0299432	0.0300989	0	0	0	0	0.010007	0	0	0	0	0	0	0	0	0	0
ENSDARG00000007438	ube2ib	ENSMUSG00000015120	Ube2i	ortholog_one2many	99.3631	98.7342	0	0	0	0.000663182	75.24	67.82	66.07	69.71	85.24	90.56	92.14	89.3133	25.18	40.13	45.46	36.9233	9.79	10.96	9.68	10.1433	4.57968e-10	19.5893	20.233	20.7154	21.6026	20.5351	20.6015	20.5817	20.1931	21.2183	21.1139	19.4959	20.5341	29.0776	29.3239	29.6518	29.4753	30.1139	30.0766	29.6198	28.3987	27.2328	26.2563
ENSDARG00000007443	fbxl18	ENSMUSG00000066640	Fbxl18	ortholog_one2one	50.8333	51.768	50	41.52	0	1.3041e-05	0.47	0.79	0.54	0.6	0.87	0.61	0.9	0.793333	3.23	4.18	2.99	3.46667	0.63	0.52	0.57	0.573333	0.0004433	0.200836	0.207016	0.234649	0.171709	0.203553	0.440231	0.428692	0.436543	0.503459	0.520896	0.514598	0.47407	0.357735	0.351261	0.380974	0.502842	0.29977	0.315067	0.367942	0.205574	0.188723	0.115728
ENSDARG00000007444	ift81	ENSMUSG00000029469	Ift81	ortholog_one2one	69.4815	69.3787	50	93.44	1	8.14562e-07	8.03	8.05	8.17	8.08333	1.06	1.09	0.84	0.996667	0.02	0.21	1.4	0.543333	0.23	0.2	0.25	0.226667	3.55627e-13	15.4882	15.7231	14.1826	14.0961	14.8725	11.6048	11.1916	11.667	12.2094	11.6422	10.9591	11.5457	5.80317	6.12022	7.43409	7.13187	6.26768	6.29283	6.50831	11.4581	10.7151	10.8766
ENSDARG00000007461	srgap1a	ENSMUSG00000020121	Srgap1	ortholog_one2many	83.877	82.9493	25	50.84	0	0.000107687	0	0	0	0	0	0	0	0	0	0	0	0	0	0	0	0	8.12668e-07	2.09193	1.82661	2.05522	2.01862	1.9981	4.40975	4.63244	4.49383	4.15569	4.44294	4.08426	4.36982	7.69995	8.48679	8.24904	8.23315	8.20081	8.89142	8.29353	6.17834	6.53399	6.01579
ENSDARG00000007465	tdrd1	ENSMUSG00000025081	Tdrd1	ortholog_one2one	30.6973	30.802	100	4.94	0	0.00489547	0.81	0.51	0.44	0.586667	0.08	0.09	0.06	0.0766667	0	0	0	0	0.02	0.02	0.00468	0.0148933	0.0244647	0	0	0	0	0	0.0317531	0.0159591	0	0	0.0184966	0	0.0110348	0	0	0	0	0	0	0	0	0	0
ENSDARG00000007467	ifit10	ENSMUSG00000079339	Ifit1bl1	ortholog_many2many	21.1494	19.5745	50	59.84	0	0.000230065	2.22	1.29	0.99	1.5	0.1	0.08	0.02	0.0666667	2.09	2.54	1.34	1.99	0.13	0.08	0.05	0.0866667	0.00349414	0	0	0	0	0	0	0	0	0	0	0	0	0	0	0	0	0	0	0	0.0873248	0.130271	0.22824
ENSDARG00000007477	fbxo8	ENSMUSG00000038206	Fbxo8	ortholog_one2one	79.5666	80.5643	100	65.75	1	0.00737318	21.37	18.09	17.53	18.9967	8.45	9.45	7.83	8.57667	2.68	3.38	1.5	2.52	3.11	2.66	3.83	3.2	9.36329e-05	5.31517	5.22427	4.97059	5.40763	5.22941	5.09722	4.98096	4.9385	5.58266	5.36847	5.30356	5.21189	6.95897	7.50457	6.68821	7.64035	6.20922	6.85707	6.9764	6.25813	6.25999	6.69444
ENSDARG00000007480	rpe65a	ENSMUSG00000028174	Rpe65	ortholog_one2many	73.1203	72.9831	0	46.78	0	1	0	0	0	0	0.08	0.05	0.06	0.0633333	0	0	0	0	0	0	0	0	1	0	0	0	0	0	0	0	0	0	0	0	0	0	0	0	0	0	0	0	0	0	0
ENSDARG00000007485	epc2	ENSMUSG00000069495	Epc2	ortholog_one2one	62.9827	58.5396	0	59.44	0	0.00415065	13.54	14.46	11.27	13.09	4.84	6.4	5.37	5.53667	1.97	1.81	5.58	3.12	4.18	3.21	3.17	3.52	6.02978e-08	1.20864	1.3938	1.92468	1.48218	1.50233	1.49025	1.59047	1.75142	1.75465	1.71475	1.79989	1.68357	0.617953	0.626342	0.575949	0.661448	0.778883	0.637724	0.649716	2.66464	3.15485	2.43206
ENSDARG00000007490	adrb1	ENSMUSG00000035283	Adrb1	ortholog_one2one	58.0488	51.073	100	77.91	1	0.269362	0	0	0	0	0	0	0	0	0	0.06	0	0.02	0.1	0.13	0.51	0.246667	1.24128e-06	0	0.0360019	0	0	0.00900047	0	0	0	0	0	0	0	0	0	0	0	0	0.0858917	0.0143153	0.0398763	0	0
ENSDARG00000007496	ufl1	ENSMUSG00000040359	Ufl1	ortholog_one2one	63.0517	63.0517	50	96.12	1	0.0119389	8.69	7.76	6.59	7.68	4.1	5.52	5.08	4.9	1.98	1.21	4.77	2.65333	6.61	4.5	5.32	5.47667	2.45175e-07	13.7867	13.1079	13.5357	13.0601	13.3726	10.8739	11.2654	10.2909	10.1442	10.5688	10.5805	10.6206	8.94291	9.02274	8.69796	8.91138	8.90069	8.23053	8.78437	10.5495	11.1843	10.8472
ENSDARG00000007523	kmt2e	ENSMUSG00000029004	Kmt2e	ortholog_one2one	56.6008	38.3298	0	50.77	0	0.00946506	1.84	1.76	1.75	1.78333	2.15	1.81	1.79	1.91667	1.13	1.37	0.79	1.09667	4.08	3.28	3.47	3.61	0	15.3403	14.9841	14.6484	14.8879	14.9652	20.7435	20.4631	20.1618	20.4591	20.0772	20.1482	20.3422	12.3822	11.2638	12.0365	12.0483	11.7403	11.7005	11.8619	28.4925	28.8042	27.3445
ENSDARG00000007526	ndufs2	ENSMUSG00000013593	Ndufs2	ortholog_one2one	81.0345	81.2095	25	30.05	0	2.09322e-07	328.25	322.44	306.72	319.137	162.64	163.35	167.99	164.66	35.52	27.89	36.68	33.3633	38.61	44.62	43.06	42.0967	3.66491e-06	141.77	140.977	150.518	148.077	145.335	109.729	109.248	105.186	105.942	108.164	107.157	107.571	102.09	102.746	100.809	95.412	101.739	101.428	100.704	79.1478	78.9712	79.7389
ENSDARG00000007531	zcchc9	ENSMUSG00000021621	Zcchc9	ortholog_one2one	53.125	50.1845	50	60.92	0	0.0158036	3.39	2.94	3.5	3.27667	17.96	16.87	17.97	17.6	6.03	7.96	15.17	9.72	4.92	4.85	4.54	4.77	2.52974e-14	5.5299	4.90072	5.39845	4.52731	5.0891	4.11625	4.82304	3.89611	4.31275	4.79555	3.95282	4.31609	4.07681	4.00302	4.40879	3.63159	4.46501	4.09531	4.11342	2.87372	3.3199	3.52031
ENSDARG00000007534	itln1	ENSMUSG00000038209	Itln1	ortholog_one2many	47.5884	47.2843	0	0	0	0.142818	0	0	0	0	0.05	0.02	0.14	0.07	0	0	0	0	1.76	7.78	1.4	3.64667	0.116615	0	0	0	0	0	0	0	0	0	0	0	0	0	0	0	0	0	0	0	0	0	0
[truncated: 16,393 more rows]
[truncated: 9 more columns]
