# Supplementary material for: Expression of Protein-Coding Gene Orthologs in Zebrafish and Mouse Inner Ear Non-sensory Supporting Cells
Source: Front Neurosci. 2019 Oct 18;13:1117. doi: 10.3389/fnins.2019.01117 (PMC6813431; doi:10.3389/fnins.2019.01117)
Supplement: Supplementary file 8 [file Data_Sheet_4.xlsx]

## Sheet: TF
ZF Gene stable ID	ZF Gene name	Mouse gene stable ID	Mouse gene name	Homology type	%id. target Mouse gene identical to zebra gene	%id. zebra gene identical to target Mouse gene	Gene-order conservation score	Whole-genome alignment coverage	High confidence ortholog [0 low, 1 high]	ZF nsSC v HC Log2 Fold Change	adj-P-Val	Mouse DC v IHC Log2 Fold Change	adj-P-Val	Mouse PC v IHC Log2 Fold Change	adj-P-Val
ENSDARG00000020746	gfi1aa	ENSMUSG00000029275	Gfi1	ortholog_one2many	61.8182	48.6708	50	0	0	-9.87264	2.29845e-13	-6.24857	1.58748e-26	-2.38091	2.366e-19
ENSDARG00000103848	apba1a	ENSMUSG00000024897	Apba1	ortholog_one2many	62.6033	71.9715	50	78.13	1	-8.54475	2.086e-07	-5.57862	2.30249e-26	-3.09899	4.11414e-22
ENSDARG00000005559	pou4f1	ENSMUSG00000048349	Pou4f1	ortholog_one2one	84.5109	73.8717	50	100	1	-8.29719	2.84313e-12	0	0.433597	0	1.10528e-07
ENSDARG00000004023	isl1	ENSMUSG00000042258	Isl1	ortholog_one2one	97.9943	97.9943	25	100	1	-8.22122	3.65599e-11	0.00668345	0.951583	0.665005	5.22801e-15
ENSDARG00000018817	bdnf	ENSMUSG00000048482	Bdnf	ortholog_one2one	67.4074	70.8171	50	99.81	1	-8.16488	1.12465e-13	-4.76968	1.58748e-26	-0.956807	1.81137e-14
ENSDARG00000006206	pou4f3	ENSMUSG00000024497	Pou4f3	ortholog_one2one	84.29	82.5444	50	100	1	-8.01038	9.73624e-14	-5.90252	2.89853e-27	-2.97373	1.28339e-21
ENSDARG00000033498	rorb	ENSMUSG00000036192	Rorb	ortholog_one2one	83.9056	83.1915	25	34.05	0	-7.88809	7.24846e-13	-2.87612	1.43617e-29	-0.0417875	0.140078
ENSDARG00000042141	myo6b	ENSMUSG00000033577	Myo6	ortholog_one2many	79.6584	81.2995	50	19.09	0	-7.58537	8.93786e-10	0.0846226	0.233604	-1.60892	6.16876e-17
ENSDARG00000061249	myom1a	ENSMUSG00000024049	Myom1	ortholog_one2many	56.0351	49.85	100	19.55	1	-7.38393	3.53319e-10	1.44803	4.31377e-15	-0.0289154	0.863147
ENSDARG00000031783	adcy8	ENSMUSG00000022376	Adcy8	ortholog_one2one	84.3115	59.8078	50	47.92	0	-6.85223	6.53379e-12	0	1.22324e-22	-0.942597	5.02609e-13
ENSDARG00000015543	s100a1	ENSMUSG00000044080	S100a1	ortholog_one2one	67.7083	69.1489	0	7.05	0	-6.70857	1.25731e-10	2.00329	3.55166e-20	0.756255	9.61353e-12
ENSDARG00000074319	sall1a	ENSMUSG00000031665	Sall1	ortholog_one2one	67.5552	67.0446	100	100	1	-6.68137	5.4386e-10	-2.9299	5.29749e-12	0.0802112	0.784
ENSDARG00000101919	foxj1a	ENSMUSG00000034227	Foxj1	ortholog_one2one	47.8166	52.019	25	83.74	0	-6.57032	1.50546e-12	0	1	0	0.000185833
ENSDARG00000058394	tagln3b	ENSMUSG00000022658	Tagln3	ortholog_one2many	70.892	75.8794	25	100	1	-6.31555	5.58828e-11	2.44432	3.87316e-11	2.38415	7.85495e-11
ENSDARG00000075859	mcf2la	ENSMUSG00000031442	Mcf2l	ortholog_one2many	63.7221	63.234	25	25.45	0	-6.29825	1.95734e-09	-0.926861	5.34278e-12	-0.22217	0.00262606
ENSDARG00000103843	spag8	ENSMUSG00000066196	Spag8	ortholog_one2one	31.3131	13.1915	25	0	0	-6.26889	1.32985e-11	2.16081	4.06969e-11	-1.67243	0.00107733
ENSDARG00000056175	scrt2	ENSMUSG00000060257	Scrt2	ortholog_one2one	55.1282	55.3055	75	39.92	1	-6.11348	4.24044e-11	0	2.41117e-11	0	0.228394
ENSDARG00000102995	rbm24a	ENSMUSG00000038132	Rbm24	ortholog_one2one	84.7826	82.6271	50	60.04	0	-6.0942	2.67492e-12	-6.15452	2.3665e-26	-2.49784	3.57899e-19
ENSDARG00000031683	fosab	ENSMUSG00000021250	Fos	ortholog_one2one	55.5874	51.0526	0	49.92	0	-5.89974	1.60094e-05	0.982976	2.84808e-05	0.804128	0.000372744
ENSDARG00000057586	sall3b	ENSMUSG00000024565	Sall3	ortholog_one2many	53.729	53.6859	75	0.88	1	-5.74346	3.72593e-09	-1.64483	3.09161e-17	-0.253729	0.000228249
ENSDARG00000043531	jun	ENSMUSG00000052684	Jun	ortholog_one2one	77.2727	71.2575	0	50.49	0	-5.71733	3.28912e-07	-0.214243	0.494545	-0.0188907	1
ENSDARG00000051762	DNAJA4	ENSMUSG00000032285	Dnaja4	ortholog_one2one	61.2732	58.1864	0	93.4	1	-5.7112	1.45603e-09	-1.8729	1.59461e-18	-1.29819	3.34467e-15
ENSDARG00000070425	dll4	ENSMUSG00000027314	Dll4	ortholog_one2one	55.0512	54.8105	50	87.43	1	-5.56771	2.81586e-09	0	1	0	1
ENSDARG00000020133	jdp2b	ENSMUSG00000034271	Jdp2	ortholog_one2many	63.3166	77.3006	50	0	0	-5.55704	3.56366e-07	1.82078	3.24648e-14	0.501741	0.000132833
ENSDARG00000062593	stox1	ENSMUSG00000036923	Stox1	ortholog_one2one	28.0248	27.3737	50	15.37	0	-5.51232	1.77958e-10	0	2.53395e-07	0	2.66646e-07
ENSDARG00000039701	emx2	ENSMUSG00000043969	Emx2	ortholog_one2one	94.7368	92.4901	50	100	1	-5.35509	9.59166e-10	2.22903	6.27695e-19	0.947136	1.34403e-10
ENSDARG00000077425	nacc2	ENSMUSG00000026932	Nacc2	ortholog_one2one	56.917	49.1468	25	87.68	1	-5.33688	6.94631e-11	1.04645	3.97244e-17	0.820866	7.43365e-15
ENSDARG00000055751	fosb	ENSMUSG00000003545	Fosb	ortholog_one2one	43.7956	53.2544	0	88.99	0	-5.27139	8.92153e-09	0	0.998464	0	0.00166342
ENSDARG00000055158	prox1a	ENSMUSG00000010175	Prox1	ortholog_one2one	82.2733	82.4966	50	100	1	-5.10719	6.33073e-08	0	0.0668764	0	0.000181173
ENSDARG00000042726	GRB7	ENSMUSG00000019312	Grb7	ortholog_one2one	49.3409	48.972	0	14.38	0	-4.99377	1.50924e-09	1.47047	2.53281e-09	1.77498	8.16603e-11
ENSDARG00000037917	itga3a	ENSMUSG00000001507	Itga3	ortholog_one2many	41.0256	40.4494	0	9.69	0	-4.95545	1.53796e-05	0.704652	5.79064e-07	1.3962	3.15287e-12
ENSDARG00000006207	gpx1b	ENSMUSG00000063856	Gpx1	ortholog_one2many	67.5393	64.1791	25	5.33	0	-4.95273	0.00166657	1.04163	2.01994e-16	0.644521	2.99413e-12
ENSDARG00000076473	trim37	ENSMUSG00000018548	Trim37	ortholog_one2one	65.2038	64.9324	50	6.64	0	-4.91362	5.64418e-08	-0.57929	1.89464e-08	-1.02049	1.1774e-12
ENSDARG00000070913	sox2	ENSMUSG00000074637	Sox2	ortholog_one2one	87.619	86.5204	100	57.78	1	-4.89575	4.49268e-09	-0.696028	1.61392e-12	0.618896	1.21309e-11
ENSDARG00000077301	mlf1	ENSMUSG00000048416	Mlf1	ortholog_one2one	40.3922	36.5248	50	37.2	0	-4.85813	2.55239e-09	-5.76314	7.81381e-23	-2.38967	9.2088e-18
ENSDARG00000100822	mapk15	ENSMUSG00000063704	Mapk15	ortholog_one2one	49.1396	46.8124	0	40.88	0	-4.85527	9.76218e-10	1.9703	5.36392e-14	1.04332	4.23317e-08
ENSDARG00000058606	sik1	ENSMUSG00000024042	Sik1	ortholog_one2one	56.2269	58.5366	25	89.18	1	-4.83864	4.21412e-08	0.953885	0.162304	0.248972	0.845435
ENSDARG00000039987	hivep2a	ENSMUSG00000015501	Hivep2	ortholog_one2many	47.2665	45.1852	100	55.21	0	-4.81762	1.76227e-07	-1.6771	6.32024e-16	0.297457	2.73058e-05
ENSDARG00000086735	si:ch1073-111c8.3	ENSMUSG00000109336	Samd4b	ortholog_one2one	42.2695	43.377	0	46.37	0	-4.80437	1.42316e-10	1.55162	5.33439e-12	0.441027	0.00228601
ENSDARG00000052604	cpeb2	ENSMUSG00000039782	Cpeb2	ortholog_one2one	71.2912	52.3186	50	70.46	0	-4.78097	1.01419e-09	1.44243	4.48137e-05	0.831163	0.0131138
ENSDARG00000069297	upf3a	ENSMUSG00000038398	Upf3a	ortholog_one2one	43.0962	48.8152	25	9.69	0	-4.77934	5.94312e-09	-0.396452	5.2716e-05	-1.02359	2.61398e-11
ENSDARG00000053479	gdf6a	ENSMUSG00000051279	Gdf6	ortholog_one2many	52.4272	47.5771	0	31.88	0	-4.75763	2.2278e-11	1.70656	1.23804e-17	0.160934	0.0366949
ENSDARG00000014259	eya1	ENSMUSG00000025932	Eya1	ortholog_one2one	84.2365	86.802	100	91.64	1	-4.59854	1.76702e-12	1.51553	5.3462e-26	0.422124	1.46541e-14
ENSDARG00000037030	casz1	ENSMUSG00000028977	Casz1	ortholog_one2one	56.6085	64.4154	100	22	1	-4.58703	1.02494e-08	-1.3211	5.08481e-10	-1.33155	5.3359e-10
ENSDARG00000020231	mapre3a	ENSMUSG00000029166	Mapre3	ortholog_one2one	81.8533	75.4448	25	0	0	-4.53978	1.43589e-06	-0.305343	0.00118995	-0.0553836	0.564241
ENSDARG00000044532	nr4a2b	ENSMUSG00000026826	Nr4a2	ortholog_one2one	72.8669	71.4047	25	4.02	0	-4.47132	3.03923e-08	0	2.04888e-16	-0.669872	2.14114e-07
ENSDARG00000027740	adcyap1b	ENSMUSG00000024256	Adcyap1	ortholog_one2one	53.7143	53.7143	0	26.15	0	-4.45842	1.71505e-08	0	2.79942e-06	0	1.11991e-05
ENSDARG00000009493	MAP3K13	ENSMUSG00000033618	Map3k13	ortholog_one2one	63.5066	64.9635	0	39.74	0	-4.4189	2.7706e-10	-0.805647	0.000415748	-0.378554	0.050437
ENSDARG00000056252	sort1b	ENSMUSG00000068747	Sort1	ortholog_one2many	61.1043	58.042	50	9.91	0	-4.40342	3.51127e-09	-0.257472	0.00182927	-0.0461194	0.599386
ENSDARG00000103959	pak1	ENSMUSG00000030774	Pak1	ortholog_one2one	78.7565	83.8235	50	10.5	0	-4.3292	1.19835e-09	0.346529	4.63877e-06	0.814316	2.47424e-12
ENSDARG00000058528	cnot10	ENSMUSG00000056167	Cnot10	ortholog_one2one	76.2821	63.9785	25	47.5	0	-4.29194	1.3485e-06	-0.223281	0.011105	-0.735251	7.74616e-09
ENSDARG00000056680	stc2a	ENSMUSG00000020303	Stc2	ortholog_one2many	55.2901	54.7297	25	49.06	0	-4.27998	1.60334e-10	0	0.864185	0	1
ENSDARG00000000796	nr4a1	ENSMUSG00000023034	Nr4a1	ortholog_one2one	57.069	55.0749	25	48.4	0	-4.24513	6.72369e-07	-3.40446	2.2896e-16	-1.2962	1.49493e-09
ENSDARG00000037324	klhl17	ENSMUSG00000078485	Plekhn1	ortholog_one2one	90.3553	83.4375	100	31.28	1	-4.23153	2.4367e-07	0.793968	0.00014057	1.01404	3.65118e-06
ENSDARG00000061214	lipin2	ENSMUSG00000024052	Lpin2	ortholog_one2one	62.0616	62.7282	75	81.87	1	-4.21747	6.51308e-10	1.061	3.55182e-10	0.610488	3.9895e-06
ENSDARG00000063475	abcg1	ENSMUSG00000024030	Abcg1	ortholog_one2one	84.9926	85.8859	0	84.98	1	-4.18176	9.58106e-12	0.837935	2.10668e-07	1.66756	1.33379e-13
ENSDARG00000074030	myt1a	ENSMUSG00000010505	Myt1	ortholog_one2many	57.1784	58.9393	25	15.68	0	-4.17142	5.46566e-08	-3.59705	7.47415e-17	-0.479662	8.12187e-06
ENSDARG00000060901	trim62	ENSMUSG00000041000	Trim62	ortholog_one2many	82.1053	82.1053	25	68.93	0	-4.14466	1.26995e-09	-0.342559	8.66997e-06	-0.554685	5.65691e-09
ENSDARG00000004130	mvk	ENSMUSG00000041939	Mvk	ortholog_one2one	53.5354	52.0885	100	46.91	1	-4.13521	0.000108354	-1.26872	6.2276e-05	-0.548325	0.0438756
ENSDARG00000098726	rptor	ENSMUSG00000025583	Rptor	ortholog_one2one	86.2069	88.015	0	66.83	0	-4.12668	1.51754e-07	0.604428	1.80759e-05	1.48711	4.96066e-13
ENSDARG00000056605	wbp2	ENSMUSG00000034341	Wbp2	ortholog_one2one	64.0152	64.751	0	87.24	1	-4.11959	1.16424e-06	-0.192602	0.132586	-0.321846	0.0137163
ENSDARG00000055294	atoh1a	ENSMUSG00000073043	Atoh1	ortholog_one2one	45.8904	38.1766	75	73.54	0	-4.11745	1.55991e-08	0	3.27065e-11	0	3.74288e-11
ENSDARG00000007823	atf3	ENSMUSG00000026628	Atf3	ortholog_one2one	63.8614	71.2707	50	61.99	0	-4.1041	2.50165e-06	0	1	0	1
ENSDARG00000086471	pkig	ENSMUSG00000035268	Pkig	ortholog_one2one	44.1558	44.7368	100	64.95	0	-4.07468	1.65498e-07	-2.95683	4.87031e-27	-1.80465	2.29439e-22
ENSDARG00000076142	trib1	ENSMUSG00000032501	Trib1	ortholog_one2one	53.2951	50	25	56.5	0	-4.07322	4.43812e-08	0.839165	2.96152e-08	-0.861698	2.32989e-07
ENSDARG00000021891	zbtb7b	ENSMUSG00000028042	Zbtb7b	ortholog_one2one	46.4668	39.8897	0	57.32	0	-4.06146	1.45731e-07	-0.772723	0.000802324	0.171822	0.425741
ENSDARG00000077047	ptprnb	ENSMUSG00000026204	Ptprn	ortholog_one2many	52.381	48.2161	50	3.25	0	-4.047	3.69067e-09	0	0.00661108	0	0.00116676
ENSDARG00000015449	fut8a	ENSMUSG00000021065	Fut8	ortholog_one2many	79.5181	80.3478	50	81.28	1	-4.00671	1.67204e-07	0.182097	0.000438674	0.462321	6.13682e-10
ENSDARG00000052818	smcr8a	ENSMUSG00000049323	Smcr8	ortholog_one2many	56.0375	51.123	75	89.72	1	-3.97128	2.5773e-07	0.885179	2.42834e-06	0.301851	0.0748764
ENSDARG00000056691	cpeb4a	ENSMUSG00000020300	Cpeb4	ortholog_one2many	77.0982	74.3484	25	3.26	0	-3.94902	2.76811e-07	-0.706763	2.04688e-05	0.161548	0.255449
ENSDARG00000004988	ppp3ca	ENSMUSG00000028161	Ppp3ca	ortholog_one2many	82.9746	81.382	0	50.39	0	-3.91742	2.78554e-08	-0.646367	2.70925e-09	-0.323954	7.49278e-05
ENSDARG00000037777	stk16	ENSMUSG00000026201	Stk16	ortholog_one2one	64.3791	64.5902	0	85.39	1	-3.90327	1.87747e-07	-1.20703	2.05954e-12	-1.06707	2.3992e-11
ENSDARG00000104100	bmpr1ba	ENSMUSG00000052430	Bmpr1b	ortholog_one2many	77.9245	82.2709	50	0.04	0	-3.89396	1.59134e-06	-2.13394	1.08689e-22	-0.816252	1.03533e-14
ENSDARG00000034871	mid2	ENSMUSG00000000266	Mid2	ortholog_one2one	80.2228	84.0876	50	90.8	1	-3.87827	9.73274e-09	-0.386276	0.0104182	0.135431	0.334116
ENSDARG00000044083	peli1b	ENSMUSG00000020134	Peli1	ortholog_one2many	89.1765	90.6699	75	87.95	1	-3.84955	1.39689e-08	-0.201844	0.0415363	0.262321	0.00901913
ENSDARG00000062748	pkn1b	ENSMUSG00000057672	Pkn1	ortholog_one2many	64.9462	63.5121	0	30.96	0	-3.814	1.17716e-08	0.930629	3.18777e-11	0.139534	0.111027
ENSDARG00000012409	rnf207b	ENSMUSG00000058498	Rnf207	ortholog_one2many	57.2555	57.1654	25	94.97	1	-3.7874	3.28356e-09	0	1	0	1
ENSDARG00000021948	tnc	ENSMUSG00000028364	Tnc	ortholog_one2many	54.169	48.5884	0	87.78	1	-3.78153	5.90028e-09	0	1	0	3.1754e-06
ENSDARG00000016526	gata3	ENSMUSG00000015619	Gata3	ortholog_one2one	79.9087	79.0068	100	100	1	-3.75889	2.43695e-09	1.16798	3.19313e-22	0.168283	2.19997e-06
ENSDARG00000069269	wdr35	ENSMUSG00000066643	Wdr35	ortholog_one2one	78.803	80.271	25	58.51	0	-3.71608	9.14552e-10	-0.971985	4.91175e-17	-1.07721	1.16454e-17
ENSDARG00000102418	enc2	ENSMUSG00000055652	Klhl25	ortholog_one2one	78.88	83.7012	0	53.75	0	-3.71397	3.48432e-07	-0.35789	0.0111106	0.45244	0.00118388
ENSDARG00000019274	rasd1	ENSMUSG00000049892	Rasd1	ortholog_one2one	81.8868	77.5	75	100	1	-3.68886	3.52102e-09	-3.32842	4.92237e-16	0.371674	0.00703221
ENSDARG00000045661	irf7	ENSMUSG00000025498	Irf7	ortholog_one2one	30.0948	27.7899	50	45.34	0	-3.65075	1.99658e-08	4.60248	3.28884e-18	3.39246	7.69405e-14
ENSDARG00000077648	FNIP2	ENSMUSG00000061175	Fnip2	ortholog_one2one	54.1806	43.8628	0	13.12	0	-3.64009	2.09672e-06	-1.93007	6.10752e-06	-0.624802	0.0183972
ENSDARG00000062518	ulk1a	ENSMUSG00000029512	Ulk1	ortholog_one2many	54.0453	47.3983	25	0	0	-3.63939	4.40596e-05	1.37576	1.17673e-08	1.11613	5.06225e-07
ENSDARG00000070538	hey1	ENSMUSG00000040289	Hey1	ortholog_one2one	66.2461	70.2341	50	100	1	-3.61691	1.7558e-07	2.24955	1.675e-22	0.415968	5.24782e-08
ENSDARG00000013575	rfx2	ENSMUSG00000024206	Rfx2	ortholog_one2one	71.6621	73.3612	50	33.77	0	-3.61661	1.53886e-08	0	3.07191e-08	1.99647	8.14946e-13
ENSDARG00000020107	usp2a	ENSMUSG00000032010	Usp2	ortholog_one2one	72.8426	46.3651	0	14.89	0	-3.6076	8.07776e-07	-1.49952	9.73698e-13	-1.27562	2.2062e-11
ENSDARG00000098135	stk40	ENSMUSG00000042608	Stk40	ortholog_one2one	85.3026	65.9243	0	98.76	1	-3.56984	6.90062e-07	-2.12438	6.06874e-18	-1.8763	9.12172e-17
ENSDARG00000069111	IKZF2	ENSMUSG00000025997	Ikzf2	ortholog_one2one	55.1102	52.2814	100	1.11	1	-3.54817	4.61339e-08	1.22826	2.10322e-10	1.13732	1.21463e-09
ENSDARG00000069763	etv5a	ENSMUSG00000013089	Etv5	ortholog_one2many	59.7328	61.3725	25	18.49	0	-3.5364	1.60719e-07	-2.19983	1.42987e-16	-0.385927	0.000144226
ENSDARG00000102512	kdm8	ENSMUSG00000030752	Kdm8	ortholog_one2one	55.4187	54.3478	25	36.04	0	-3.50809	9.21811e-06	0.0690052	0.677319	-1.3082	1.52e-09
ENSDARG00000043757	ptbp3	ENSMUSG00000028382	Ptbp3	ortholog_one2one	81.6092	77.314	75	1.61	1	-3.48736	3.90111e-06	-1.28721	9.95144e-15	-1.16214	8.07701e-14
ENSDARG00000012368	ttc21b	ENSMUSG00000034848	Ttc21b	ortholog_one2one	66.0106	66.3118	75	93.97	1	-3.47792	6.10344e-08	2.43472	6.95537e-14	1.84406	2.18977e-10
ENSDARG00000026473	six1b	ENSMUSG00000051367	Six1	ortholog_one2one	91.5493	91.5493	75	50.55	1	-3.47686	7.305e-11	0.148992	0.000129525	-0.563356	5.17956e-14
ENSDARG00000092738	si:ch211-263k4.2	ENSMUSG00000027684	Mecom	ortholog_one2one	20.9302	3.76045	0	30.32	0	-3.46864	1.61547e-10	0	0.816109	0	1.40236e-06
ENSDARG00000078434	znf692	ENSMUSG00000037243	Zfp692	ortholog_one2one	29.8211	28.2486	0	43.1	0	-3.41921	5.61651e-08	-0.0216703	0.899989	-0.845695	1.72752e-07
ENSDARG00000036281	CC2D1A	ENSMUSG00000036686	Cc2d1a	ortholog_one2one	43.9	46.5536	25	22.74	0	-3.41602	0.000100722	0.406016	0.000543905	-0.532248	3.55522e-05
ENSDARG00000044938	cbx2	ENSMUSG00000025577	Cbx2	ortholog_one2one	43.9689	43.5453	0	35.58	0	-3.40977	9.88357e-08	0	2.38187e-08	0	1.2383e-07
ENSDARG00000067607	srebf1	ENSMUSG00000020538	Srebf1	ortholog_one2one	50.1815	48.7654	75	17.2	1	-3.37917	0.000498609	-0.03576	0.77081	0.223226	0.025124
ENSDARG00000070045	celf4	ENSMUSG00000024268	Celf4	ortholog_one2one	81.2346	65.2778	50	48.8	0	-3.37532	2.93138e-06	-0.912661	0.000728957	1.42386	5.26579e-10
ENSDARG00000089223	ngfrb	ENSMUSG00000000120	Ngfr	ortholog_one2many	46.6357	47.0726	0	1.27	0	-3.37407	9.44422e-07	0	0.0012864	0	3.81311e-05
ENSDARG00000013615	pbx3b	ENSMUSG00000038718	Pbx3	ortholog_one2many	82.3245	78.341	50	95.83	1	-3.37309	5.51569e-08	-1.12249	1.02914e-10	-0.945963	1.57012e-09
ENSDARG00000022904	skilb	ENSMUSG00000027660	Skil	ortholog_one2many	47.3901	51.1111	25	0	0	-3.37149	6.55714e-07	-1.05666	2.85789e-08	0.161472	0.189792
ENSDARG00000077092	elk4	ENSMUSG00000026436	Elk4	ortholog_one2one	52.5959	54.186	100	4.15	1	-3.36022	9.29582e-06	-0.220189	0.251618	0.406238	0.0201669
ENSDARG00000087180	ubxn2a	ENSMUSG00000020634	Ubxn2a	ortholog_one2one	42.6357	42.6357	100	0	0	-3.3421	6.26532e-08	-0.519449	2.09814e-11	-0.133152	0.00409644
ENSDARG00000068166	dfnb31b	ENSMUSG00000039137	Whrn	ortholog_one2many	42.9175	44.2266	0	0.16	0	-3.3373	6.36764e-08	-5.37162	2.70279e-29	-2.91826	3.41277e-25
ENSDARG00000068894	nrip1b	ENSMUSG00000048490	Nrip1	ortholog_one2many	37.037	23.2558	0	77.61	0	-3.33355	2.51952e-07	-0.902815	5.21392e-12	0.0616072	0.395234
ENSDARG00000030297	sox13	ENSMUSG00000070643	Sox13	ortholog_one2one	48.5762	47.3083	50	14.73	0	-3.33065	4.28486e-09	0.383883	5.61322e-07	0.960473	4.11147e-14
ENSDARG00000075116	sall2	ENSMUSG00000049532	Sall2	ortholog_one2many	23.8806	27.0916	0	0	0	-3.30829	2.60098e-07	0.185939	0.00110175	0.789054	2.16177e-13
ENSDARG00000099849	ebf1a	ENSMUSG00000057098	Ebf1	ortholog_one2many	86.6667	28.5473	75	38	1	-3.29813	6.48976e-08	0.139885	0.00126857	1.21535	2.072e-19
ENSDARG00000045519	sfmbt2	ENSMUSG00000061186	Sfmbt2	ortholog_one2one	56.2137	49.641	100	50.88	1	-3.2871	4.2918e-06	0	0.203746	0	1.28377e-06
ENSDARG00000102690	rims2b	ENSMUSG00000037386	Rims2	ortholog_one2many	42.4242	23.1552	50	15.63	0	-3.28391	0.000182581	-5.34988	2.60432e-24	-1.98478	7.38253e-19
ENSDARG00000074759	ccar1	ENSMUSG00000020074	Ccar1	ortholog_one2one	66.2479	69.0227	75	91.78	1	-3.24023	2.25482e-09	-0.93927	2.9932e-14	-0.271038	3.43325e-05
ENSDARG00000010415	sirt4	ENSMUSG00000029524	Sirt4	ortholog_one2one	60.4396	49.5495	0	69.75	0	-3.22951	4.5544e-08	-1.75721	3.10899e-14	-0.213928	0.0345905
ENSDARG00000052482	arhgef11	ENSMUSG00000041977	Arhgef11	ortholog_one2one	45.6276	41.6881	0	5.19	0	-3.1892	1.20946e-07	0.793231	1.90393e-06	0.510163	0.000693247
ENSDARG00000044167	padi2	ENSMUSG00000028927	Padi2	ortholog_one2one	53.0139	50.9658	0	34.35	0	-3.18382	2.27968e-06	1.54828	9.16817e-27	0.520221	4.92828e-17
ENSDARG00000102773	cacna1da	ENSMUSG00000015968	Cacna1d	ortholog_one2many	65.5854	59.7415	25	56.7	0	-3.17316	3.38815e-05	-2.05634	1.33111e-07	-0.506279	0.0478586
ENSDARG00000059836	ddit3	ENSMUSG00000025408	Ddit3	ortholog_one2one	30.9917	44.6429	100	49.74	0	-3.17305	1.51933e-07	0.874549	6.77846e-11	-0.173778	0.0363053
ENSDARG00000041323	csdc2a	ENSMUSG00000042109	Csdc2	ortholog_one2many	64.7059	64.2857	50	54.01	0	-3.15913	8.24662e-06	-1.05232	3.46536e-10	-0.399782	0.000255674
ENSDARG00000031768	roraa	ENSMUSG00000032238	Rora	ortholog_one2one	89.9573	80.4971	50	93.58	1	-3.1482	5.46523e-09	-1.26345	1.56457e-10	-0.130349	0.288256
ENSDARG00000001785	irx2a	ENSMUSG00000001504	Irx2	ortholog_one2one	71.2963	64.9789	50	55.9	0	-3.12648	1.42769e-09	-3.38207	3.82725e-18	-2.38982	9.39139e-16
ENSDARG00000029368	srpk2	ENSMUSG00000062604	Srpk2	ortholog_one2one	47.9918	68.3284	0	27.93	0	-3.09943	1.41808e-08	1.04628	2.5615e-14	1.30951	3.0211e-16
ENSDARG00000069893	sphk2	ENSMUSG00000057342	Sphk2	ortholog_one2one	36.1789	43.2739	0	32.43	0	-3.09878	2.17465e-10	0.259989	0.047511	0.0360323	0.869472
ENSDARG00000077400	rbm10	ENSMUSG00000031060	Rbm10	ortholog_one2one	46.0424	44.4086	0	7.22	0	-3.07823	2.2347e-06	-0.210459	0.183545	-0.281363	0.0749673
ENSDARG00000077955	rnf6	ENSMUSG00000029634	Rnf6	ortholog_one2one	41.1444	45.2774	25	31.91	0	-3.07818	2.96812e-06	-0.894321	1.32326e-19	-0.401698	1.19942e-12
ENSDARG00000103457	spg20b	ENSMUSG00000036580	Spg20	ortholog_one2one	56.5588	49.4784	50	63.78	0	-3.0709	5.50151e-07	-0.534919	2.44927e-12	-0.468719	3.54102e-11
ENSDARG00000075139	hdac5	ENSMUSG00000008855	Hdac5	ortholog_one2one	72.3502	70.0268	25	46.07	0	-3.06288	1.72594e-06	-0.422342	1.26377e-06	-0.0234307	0.792575
ENSDARG00000098635	irf2bp2b	ENSMUSG00000051495	Irf2bp2	ortholog_one2many	56.2874	49.4737	50	0	0	-3.04634	1.30298e-06	1.65242	5.07503e-11	0.86843	4.38224e-06
ENSDARG00000027353	zmym2	ENSMUSG00000040123	Zmym5	ortholog_one2many	16.8018	36.3636	75	19.89	1	-3.03972	5.21394e-09	-0.160156	0.136905	-0.0541726	0.674715
ENSDARG00000006754	mllt3	ENSMUSG00000028496	Mllt3	ortholog_one2one	62.3423	60.8084	50	83.29	1	-3.03926	1.3304e-09	0.957343	2.11652e-10	1.30911	3.26715e-13
ENSDARG00000014945	znf598	ENSMUSG00000041130	Zfp598	ortholog_one2one	48.265	50.5507	50	45.17	0	-3.0368	1.42495e-06	-0.379338	0.0314051	0.29979	0.0780593
ENSDARG00000002216	tbx3a	ENSMUSG00000018604	Tbx3	ortholog_one2one	73.5849	68.4211	25	60.66	0	-3.03052	9.9056e-09	0	1.51745e-06	0	1.84871e-07
ENSDARG00000104676	prkd2	ENSMUSG00000041187	Prkd2	ortholog_one2many	75.4967	13.0286	50	29.43	0	-3.00872	2.52834e-07	-0.770582	1.52822e-08	-0.73636	3.2778e-08
ENSDARG00000063079	ago3b	ENSMUSG00000028842	Ago3	ortholog_one2many	93.7716	94.5349	0	37.77	0	-3.00777	1.96704e-05	0.0488818	0.760717	0.44897	0.000328153
ENSDARG00000063522	bbs4	ENSMUSG00000025235	Bbs4	ortholog_one2one	70.2652	71.3462	50	43.21	0	-2.96695	1.67162e-06	-0.164143	0.0433888	-0.0490831	0.585087
ENSDARG00000070012	sesn2	ENSMUSG00000028893	Sesn2	ortholog_one2one	60.3604	55.8333	0	0.21	0	-2.96387	2.52362e-07	3.56894	3.42197e-18	2.64808	4.95032e-14
ENSDARG00000013997	ern1	ENSMUSG00000020715	Ern1	ortholog_one2one	66.5373	70.2149	25	4.05	0	-2.95821	0.0010321	-0.951315	0.000419727	-0.224175	0.303887
ENSDARG00000055429	kat6b	ENSMUSG00000021767	Kat6b	ortholog_one2one	49.3882	57.232	50	78.35	0	-2.94197	2.69926e-09	0.300928	0.00582798	0.521397	1.38078e-05
ENSDARG00000078311	dcaf6	ENSMUSG00000026571	Dcaf6	ortholog_one2one	60.1985	62.3288	50	3.37	0	-2.94152	5.62223e-06	0.87998	2.63587e-08	0.462333	0.000347886
ENSDARG00000027065	slc38a3a	ENSMUSG00000010064	Slc38a3	ortholog_one2many	65.8349	67.9208	25	0	0	-2.93107	6.85905e-07	1.30257	0.007499	1.26714	0.0104231
ENSDARG00000079552	maml3	ENSMUSG00000061143	Maml3	ortholog_one2one	46.0419	44.5815	0	90.86	0	-2.9288	2.53947e-06	1.50309	1.9908e-11	0.994447	1.15862e-07
ENSDARG00000075211	chd7	ENSMUSG00000041235	Chd7	ortholog_one2one	62.293	65.5057	50	68.17	0	-2.92149	2.38901e-06	-0.125073	0.0174677	0.52262	1.68914e-10
ENSDARG00000021372	tob1b	ENSMUSG00000037573	Tob1	ortholog_one2many	82.2981	73.2044	50	0	0	-2.90516	1.08812e-07	0.135031	0.131245	-0.0948066	0.300988
ENSDARG00000005372	camk4	ENSMUSG00000038128	Camk4	ortholog_one2one	79.6703	61.8337	25	57.21	0	-2.9046	0.0154668	0	0.960642	0	5.37852e-14
ENSDARG00000052866	htt	ENSMUSG00000029104	Htt	ortholog_one2one	71.1311	71.1538	50	54.9	0	-2.89755	2.99192e-08	-0.429558	0.00194992	-0.180282	0.151913
ENSDARG00000100789	plgrkt	ENSMUSG00000016495	Plgrkt	ortholog_one2one	60.4027	61.2245	0	71.56	0	-2.89445	2.38989e-06	0.863303	2.11455e-07	-0.0510343	0.812916
ENSDARG00000044827	wnt7aa	ENSMUSG00000030093	Wnt7a	ortholog_one2many	86.533	86.533	50	62.61	0	-2.89021	2.58263e-09	2.17606	1.17899e-21	1.53968	3.90873e-18
ENSDARG00000089930	iqce	ENSMUSG00000036555	Iqce	ortholog_one2one	32.5	28.4062	25	1.97	0	-2.88309	3.37051e-05	-1.57954	1.93736e-08	-0.0368113	0.845897
ENSDARG00000075593	trim71	ENSMUSG00000079259	Trim71	ortholog_one2one	75.1214	72.3977	0	93.24	1	-2.85779	4.33755e-07	-0.4318	0.209916	0	0.00897288
ENSDARG00000045025	ift52	ENSMUSG00000017858	Ift52	ortholog_one2one	77.7011	79.3427	25	97.81	1	-2.85725	4.54424e-10	1.18999	3.52522e-15	0.351263	9.11517e-06
ENSDARG00000028017	tp53inp1	ENSMUSG00000028211	Trp53inp1	ortholog_one2one	43.9834	44.3515	75	69.4	0	-2.85081	3.02242e-05	1.45106	3.08315e-11	0.606458	5.09039e-05
ENSDARG00000020219	dld	ENSMUSG00000014773	Dll1	ortholog_one2many	62.3057	66.6205	50	47.42	0	-2.84477	5.13532e-08	0	0.000299426	1.94699	3.23372e-08
ENSDARG00000101569	ppargc1b	ENSMUSG00000033871	Ppargc1b	ortholog_one2one	28.2172	23.57	50	7.83	0	-2.839	9.13366e-07	0.115176	0.800747	0.583119	0.0424336
ENSDARG00000015793	creb3l1	ENSMUSG00000027230	Creb3l1	ortholog_one2one	58.365	59.0385	50	89.61	1	-2.82857	1.51291e-10	-0.712949	0.000616498	-1.17723	5.49965e-06
ENSDARG00000098368	aplp1	ENSMUSG00000006651	Aplp1	ortholog_one2one	40.3873	44.6483	50	20.68	0	-2.81725	5.04193e-09	-3.96672	3.23062e-26	-1.21281	4.87986e-16
ENSDARG00000008540	sox21b	ENSMUSG00000061517	Sox21	ortholog_one2one	81.6327	72.4638	0	77.03	1	-2.81586	8.36309e-06	0.229694	0.00132342	0.360761	7.82077e-06
ENSDARG00000075456	pik3ca	ENSMUSG00000027665	Pik3ca	ortholog_one2one	91.3003	91.3858	25	58.58	0	-2.81079	0.000147061	0.366898	5.04218e-05	0.80829	1.60514e-10
ENSDARG00000001710	flot1a	ENSMUSG00000059714	Flot1	ortholog_one2many	78.1176	77.5701	0	97.71	1	-2.80338	4.07044e-07	2.13063	6.12308e-13	1.00464	7.54075e-07
ENSDARG00000018206	nck2a	ENSMUSG00000066877	Nck2	ortholog_one2many	76.1787	80.7895	100	58.23	1	-2.79165	1.41398e-07	0.342168	0.000629972	0.12616	0.183166
ENSDARG00000093240	GMEB2	ENSMUSG00000038705	Gmeb2	ortholog_one2one	57.6846	54.5283	0	43.41	0	-2.78397	1.85051e-07	-0.00323602	1	0.417742	0.00925068
ENSDARG00000018968	acvr1ba	ENSMUSG00000000532	Acvr1b	ortholog_one2many	78.1124	77.0297	50	7.6	0	-2.78142	4.48584e-09	0.35873	0.156087	1.30852	6.42961e-07
ENSDARG00000075972	csrnp2	ENSMUSG00000044636	Csrnp2	ortholog_one2one	48.6641	47.7528	50	87.05	0	-2.78088	2.1779e-05	0.170435	0.282274	0.598854	0.000284438
ENSDARG00000060645	sirt7	ENSMUSG00000025138	Sirt7	ortholog_one2one	62.4691	62.9353	0	40.72	0	-2.7691	1.34236e-06	0.193934	0.00169352	-0.971047	6.40519e-14
ENSDARG00000055588	stat5b	ENSMUSG00000004043	Stat5a	ortholog_many2many	69.2503	68.3814	50	37.63	0	-2.76902	1.77183e-06	0.625765	0.00311224	-0.965401	0.000722857
ENSDARG00000009881	ier5	ENSMUSG00000056708	Ier5	ortholog_one2one	37.4074	32.7922	50	38.68	0	-2.76531	1.14938e-06	2.19383	1.46567e-12	1.39629	2.3709e-08
ENSDARG00000067850	jund	ENSMUSG00000071076	Jund	ortholog_one2one	60.0707	49.8534	25	80.18	1	-2.75813	1.67303e-06	0.269362	0.089812	0.391295	0.0159286
ENSDARG00000099441	cbx4	ENSMUSG00000039989	Cbx4	ortholog_one2one	44.6541	38.657	75	78.42	0	-2.75663	0.000326841	-0.58746	1.97209e-07	-0.755433	3.84988e-09
ENSDARG00000087687	TMEM100	ENSMUSG00000069763	Tmem100	ortholog_one2one	51.6129	59.7015	50	74.46	1	-2.74951	6.07232e-08	0.245707	0.566055	0.418704	0.359904
ENSDARG00000020953	dnajb6b	ENSMUSG00000029131	Dnajb6	ortholog_many2many	56.962	49.3151	50	40.82	0	-2.74717	1.19727e-07	-0.540207	1.41401e-11	-0.705849	1.07983e-13
ENSDARG00000078916	chrdl2	ENSMUSG00000030732	Chrdl2	ortholog_one2one	36.1233	37.8753	50	32.44	0	-2.71848	1.12911e-08	0	1	0	1
ENSDARG00000099383	dnajb1a	ENSMUSG00000005483	Dnajb1	ortholog_one2many	66.1765	66.1765	50	0	0	-2.71264	2.73198e-06	-1.00923	3.54162e-12	-0.60921	3.31229e-08
ENSDARG00000057439	phf1	ENSMUSG00000024193	Phf1	ortholog_one2one	48.2558	44.5438	25	53.83	0	-2.70296	1.21118e-05	0.455508	1.05334e-05	0.0749563	0.429263
ENSDARG00000071272	ncoa6	ENSMUSG00000038369	Ncoa6	ortholog_one2one	36.6241	40.1643	0	65.56	0	-2.70158	2.82714e-07	-0.36942	0.000335678	-0.341929	0.000734486
ENSDARG00000101057	srsf7b	ENSMUSG00000024097	Srsf7	ortholog_one2one	60.9524	53.7815	0	80.97	1	-2.69848	3.92341e-07	-0.635226	9.84189e-09	-0.683699	3.0933e-09
ENSDARG00000017681	mapk4	ENSMUSG00000024558	Mapk4	ortholog_one2one	52.9674	61.235	0	24.91	0	-2.69456	5.48546e-09	3.36019	3.98869e-17	1.60251	4.34609e-08
ENSDARG00000014550	rfx3	ENSMUSG00000040929	Rfx3	ortholog_one2one	73.6636	75.4339	25	2.85	0	-2.68326	0.0013338	-0.529103	0.00121653	0.859012	4.21203e-08
ENSDARG00000005883	rfx1a	ENSMUSG00000031706	Rfx1	ortholog_one2many	66.6667	62.0976	25	15.84	0	-2.6731	9.82133e-07	0.861063	6.46663e-05	0.627536	0.00270656
ENSDARG00000076041	wwc1	ENSMUSG00000018849	Wwc1	ortholog_one2one	50.0443	51.1775	0	100	1	-2.67135	4.65236e-07	1.49642	1.64326e-11	1.27363	3.85728e-10
ENSDARG00000102216	dlg1l	ENSMUSG00000022770	Dlg1	ortholog_one2many	79.4212	79.9353	25	14.66	0	-2.6685	2.6409e-09	-0.83633	1.97433e-12	-0.69856	5.87153e-11
ENSDARG00000099563	inpp5ka	ENSMUSG00000006127	Inpp5k	ortholog_one2many	40.5229	39.7436	0	78.77	0	-2.66518	0.000197568	0.726316	2.56677e-14	0.513699	2.62308e-11
ENSDARG00000057929	naf1	ENSMUSG00000014907	Naf1	ortholog_one2one	32.2068	27.1357	0	19.32	0	-2.65609	5.35374e-05	0.408943	0.19158	1.73851	5.01065e-08
ENSDARG00000098079	rab3gap1	ENSMUSG00000036104	Rab3gap1	ortholog_one2one	74.5636	60.9582	0	51.72	0	-2.64964	0.000187894	-0.938803	5.86816e-13	-0.69919	1.41288e-10
ENSDARG00000100607	zbtb38	ENSMUSG00000040433	Zbtb38	ortholog_one2one	30.1186	31.8296	50	30.69	0	-2.63093	7.75693e-07	0.251649	3.16861e-05	0.427127	1.12479e-08
ENSDARG00000040152	nek4	ENSMUSG00000021918	Nek4	ortholog_one2one	44.9941	48.2323	50	52.64	0	-2.62829	1.81232e-06	-0.276303	0.0130848	-0.347193	0.00279294
ENSDARG00000062469	hipk3a	ENSMUSG00000027177	Hipk3	ortholog_one2many	58.7469	60.5705	50	27.85	0	-2.62493	4.82702e-07	-0.919762	5.39722e-10	-0.824207	3.73684e-09
ENSDARG00000034893	rarab	ENSMUSG00000037992	Rara	ortholog_one2many	81.0811	77.9221	0	30.66	0	-2.61579	1.60862e-08	0.91641	0.000127075	0.462713	0.0522351
ENSDARG00000027234	ift88	ENSMUSG00000040040	Ift88	ortholog_one2one	77.7913	77.697	100	27.65	1	-2.61275	8.83527e-08	0.258978	0.00365841	-0.102343	0.240043
ENSDARG00000054749	lmo4b	ENSMUSG00000028266	Lmo4	ortholog_one2one	96.3636	96.3636	75	100	1	-2.60881	1.54318e-07	-0.883595	3.23403e-08	-0.946834	1.13804e-08
ENSDARG00000101115	med30	ENSMUSG00000038622	Med30	ortholog_one2one	77.0115	75.2809	75	93.63	1	-2.60832	9.3333e-09	0.62446	1.0685e-05	0.386366	0.00215745
ENSDARG00000074903	itcha	ENSMUSG00000027598	Itch	ortholog_one2many	76.3807	75.2315	0	3.62	0	-2.60466	2.60758e-06	0.282725	0.00919383	0.340013	0.00226041
ENSDARG00000017366	prdm4	ENSMUSG00000035529	Prdm4	ortholog_one2one	54.6229	55.9153	0	100	1	-2.59749	0.000520963	0.234422	6.13168e-05	0.364138	1.33793e-07
ENSDARG00000099995	apbb2b	ENSMUSG00000029207	Apbb2	ortholog_one2one	55.8427	65.3947	0	31.38	0	-2.58864	2.716e-07	-1.30047	4.04467e-19	-0.483545	4.7638e-11
ENSDARG00000004246	slit2	ENSMUSG00000031558	Slit2	ortholog_one2one	79.6958	78.1453	50	80.21	1	-2.58378	3.2642e-10	0	3.81671e-17	0	7.02036e-14
ENSDARG00000013095	gclc	ENSMUSG00000032350	Gclc	ortholog_one2one	80.6656	79.9058	75	62.34	1	-2.57	8.57983e-08	-1.29697	1.29426e-10	-1.09857	2.44024e-09
ENSDARG00000061368	klf13	ENSMUSG00000052040	Klf13	ortholog_one2one	61.2403	54.6713	50	65.1	0	-2.56465	0.0105943	0.191278	0.364122	1.06546	4.2795e-06
ENSDARG00000068179	trib2	ENSMUSG00000020601	Trib2	ortholog_one2one	78.7172	78.7172	0	100	1	-2.54634	5.04924e-06	0.0351529	0.762602	0.331592	0.00052414
ENSDARG00000043317	kita	ENSMUSG00000005672	Kit	ortholog_one2many	46.4995	45.4545	100	6.55	0	-2.53959	2.45937e-05	0	7.8317e-10	0	3.26843e-07
ENSDARG00000060058	cylda	ENSMUSG00000036712	Cyld	ortholog_one2one	68.244	67.9581	100	53.26	1	-2.52606	1.44042e-07	-2.17369	6.56446e-21	-2.02574	4.9037e-20
ENSDARG00000057272	slc30a9	ENSMUSG00000029221	Slc30a9	ortholog_one2one	70.8551	71.6049	0	77.06	1	-2.52389	1.49497e-06	-0.0122413	0.859591	0.0261468	0.629902
ENSDARG00000076889	ralgapa1	ENSMUSG00000021027	Ralgapa1	ortholog_one2one	70.1846	72.8747	50	94.33	1	-2.51944	3.27829e-05	-0.403072	2.21166e-07	-0.501305	7.43615e-09
ENSDARG00000063031	rad54l2	ENSMUSG00000040661	Rad54l2	ortholog_one2one	61.865	60.5999	0	33.56	0	-2.5175	4.28148e-05	0.145256	0.645029	-0.436667	0.166402
ENSDARG00000062531	mapk8ip3	ENSMUSG00000024163	Mapk8ip3	ortholog_one2one	72.1249	70.8302	0	90.33	1	-2.51748	9.91838e-08	0.394145	5.67503e-05	-0.526367	3.04396e-06
ENSDARG00000004445	grm5a	ENSMUSG00000049583	Grm5	ortholog_one2many	73.8075	73.3167	50	40.66	0	-2.50834	0.000183541	0	1	0	0.753677
ENSDARG00000005789	enpp1	ENSMUSG00000037370	Enpp1	ortholog_one2one	52.0501	50.4415	0	16.33	0	-2.50236	9.76407e-07	0	3.27898e-23	0	1.95706e-18
ENSDARG00000043285	zbtb21	ENSMUSG00000046962	Zbtb21	ortholog_one2one	45.3642	37.5686	0	42.48	0	-2.49404	6.06101e-08	-0.0202306	0.91835	0.863955	1.17457e-08
ENSDARG00000045685	cntn1b	ENSMUSG00000055022	Cntn1	ortholog_one2one	50.5294	51.4706	50	46.43	0	-2.48915	9.02454e-08	1.19954	8.02844e-11	2.38836	6.81678e-18
ENSDARG00000062341	wfs1a	ENSMUSG00000039474	Wfs1	ortholog_one2many	53.6313	53.9326	50	1.64	0	-2.48252	1.74026e-08	0.68562	6.39825e-06	0.010719	1
ENSDARG00000052242	aff2	ENSMUSG00000031189	Aff2	ortholog_one2one	50.6698	50.5503	50	74.54	1	-2.47179	3.41948e-08	0	4.66657e-09	0	9.14577e-14
ENSDARG00000020239	lpin1	ENSMUSG00000020593	Lpin1	ortholog_one2many	60.3261	60.0649	25	28.14	0	-2.465	5.737e-06	-1.56878	6.04301e-15	-0.772348	2.10051e-09
ENSDARG00000060093	dapk1	ENSMUSG00000021559	Dapk1	ortholog_one2one	74.1487	74.6154	50	85.25	1	-2.46237	8.83006e-08	1.12229	8.92085e-10	0.959516	1.79101e-08
ENSDARG00000077428	camta1a	ENSMUSG00000014592	Camta1	ortholog_one2many	55.8646	54.9346	25	25.58	0	-2.45066	5.37063e-05	0.91564	2.18835e-15	1.45133	2.11114e-19
ENSDARG00000020895	bag1	ENSMUSG00000028416	Bag1	ortholog_one2one	56.3107	32.6761	25	29.06	0	-2.44142	4.51641e-06	0.394502	4.38746e-06	-0.118912	0.0954845
ENSDARG00000005916	srpk3	ENSMUSG00000002007	Srpk3	ortholog_one2one	54.3662	68.3186	50	2.86	0	-2.43911	3.5778e-06	0	0.000499551	0	0.000515882
ENSDARG00000060580	tasp1	ENSMUSG00000039033	Tasp1	ortholog_one2one	70.8531	71.1905	50	65.5	0	-2.4341	0.000286368	-0.771893	2.42339e-11	-1.16604	1.5828e-14
ENSDARG00000020298	btg2	ENSMUSG00000020423	Btg2	ortholog_one2one	57.5758	60.1266	0	100	1	-2.43356	0.00130685	-1.77627	1.7149e-20	-1.13926	1.65003e-16
ENSDARG00000098834	sox4b	ENSMUSG00000076431	Sox4	ortholog_one2many	62.8655	48.8636	25	0	0	-2.42927	0.00091977	1.60656	1.36344e-18	0.529501	4.49297e-09
ENSDARG00000026801	stau2	ENSMUSG00000025920	Stau2	ortholog_one2one	60.6195	72.1053	50	84.63	1	-2.42189	6.50966e-07	-0.718897	7.59597e-12	-0.647637	5.54885e-11
ENSDARG00000100867	rictora	ENSMUSG00000050310	Rictor	ortholog_one2many	73.6218	72.7166	75	24.83	1	-2.42137	5.52976e-08	-0.412118	7.09797e-06	-0.423789	5.05918e-06
ENSDARG00000028228	zbtb18	ENSMUSG00000063659	Zbtb18	ortholog_one2one	73.743	74.5763	100	100	1	-2.41251	2.0212e-06	-1.42578	7.63998e-15	-0.0584359	0.434577
ENSDARG00000031907	ptbp1b	ENSMUSG00000006498	Ptbp1	ortholog_one2many	75.7092	76.9369	25	3.47	0	-2.4115	4.79458e-07	-0.602018	8.65533e-11	-1.09403	1.50187e-15
ENSDARG00000061011	hlfb	ENSMUSG00000003949	Hlf	ortholog_one2one	71.5719	72.5424	75	12.4	1	-2.40781	6.20186e-08	2.03499	3.92723e-13	2.35923	1.17898e-14
ENSDARG00000034503	per2	ENSMUSG00000055866	Per2	ortholog_one2one	42.8163	47.6531	25	25.32	0	-2.40372	4.99577e-07	0.996531	4.65467e-06	1.74489	2.26784e-10
ENSDARG00000087330	maza	ENSMUSG00000030678	Maz	ortholog_one2many	30.8316	31.8658	0	1.83	0	-2.39439	9.08857e-07	0.548515	0.00331913	0.545485	0.0037663
ENSDARG00000068128	ppp1r15b	ENSMUSG00000046062	Ppp1r15b	ortholog_one2one	22.541	15.7819	0	0	0	-2.39431	5.02934e-06	0.550875	6.24114e-09	0.496968	3.87122e-08
ENSDARG00000063438	srebf2	ENSMUSG00000022463	Srebf2	ortholog_one2one	50.137	48.5841	0	31.37	0	-2.38995	2.61765e-05	-0.873876	1.08073e-06	0.283637	0.0409605
ENSDARG00000003544	adarb1b	ENSMUSG00000020262	Adarb1	ortholog_one2many	77.5393	76.2307	25	14.74	0	-2.38904	0.00159851	-1.2477	1.64516e-07	-1.23526	1.81871e-07
ENSDARG00000101559	zhx2b	ENSMUSG00000022361	Zhx1	ortholog_one2one	26.1224	7.33104	0	0	0	-2.37607	1.0371e-06	0.0958624	0.213952	0.148096	0.051999
ENSDARG00000022254	prkcbb	ENSMUSG00000052889	Prkcb	ortholog_one2many	79.0419	78.4547	50	60.35	0	-2.37325	2.10093e-06	3.37903	3.10516e-22	1.03794	1.01733e-10
ENSDARG00000100821	scrt1a	ENSMUSG00000048385	Scrt1	ortholog_one2many	74.1936	59.4828	0	99.47	1	-2.37193	2.39842e-08	0	0.388747	0	0.00416497
ENSDARG00000068064	sirt1	ENSMUSG00000020063	Sirt1	ortholog_one2one	49.4366	47.6255	50	5.23	0	-2.3706	1.75885e-07	-1.01957	5.32539e-10	-0.535179	8.34408e-06
ENSDARG00000027828	grin1a	ENSMUSG00000026959	Grin1	ortholog_one2many	84.5727	81.2367	0	37.03	0	-2.36152	2.06085e-07	1.10128	0.000143896	0	0.236822
ENSDARG00000068258	lrch4	ENSMUSG00000093445	Lrch4	ortholog_one2many	47.3071	47.7941	25	5.97	0	-2.3596	3.61797e-07	1.32448	0.0510331	0.303795	0.928804
ENSDARG00000002663	optn	ENSMUSG00000026672	Optn	ortholog_one2one	41.1992	36.4726	50	56.43	0	-2.35342	8.74905e-08	3.74251	9.83385e-20	0.645346	0.000104265
ENSDARG00000007720	sub1b	ENSMUSG00000022205	Sub1	ortholog_one2many	70.1613	68.5039	75	11.23	1	-2.3504	5.4511e-08	0.458149	3.06346e-06	0.375441	4.52667e-05
ENSDARG00000070127	nfxl1	ENSMUSG00000072889	Nfxl1	ortholog_one2one	62.3729	60.1307	25	57.88	0	-2.31389	0.0018622	-0.214809	0.164236	0.755928	1.25048e-05
ENSDARG00000078076	nab2	ENSMUSG00000025402	Nab2	ortholog_one2one	47.8615	44.7619	0	46.77	0	-2.30666	0.0145187	1.89857	6.61762e-05	2.07444	1.48638e-05
ENSDARG00000034504	lmo1	ENSMUSG00000036111	Lmo1	ortholog_one2one	82.8571	92.9487	100	100	1	-2.303	3.13236e-05	-3.58942	1.52977e-24	-1.86273	9.5757e-19
ENSDARG00000069274	ighmbp2	ENSMUSG00000024831	Ighmbp2	ortholog_one2one	56.5697	56.7976	0	42.21	0	-2.28211	1.80218e-05	0.424769	0.00387029	0.307885	0.0340971
ENSDARG00000069135	ppp1r15a	ENSMUSG00000040435	Ppp1r15a	ortholog_one2one	20.0627	9.74125	0	0	0	-2.27993	0.000399687	-1.3536	2.94915e-15	-0.81968	5.16069e-11
ENSDARG00000036929	rnf139	ENSMUSG00000037075	Rnf139	ortholog_one2one	67.7711	67.3653	0	54.9	0	-2.27237	9.78836e-06	-0.0980814	0.239472	-0.294045	0.000886369
ENSDARG00000104251	prdm10	ENSMUSG00000042496	Prdm10	ortholog_one2one	61.6497	63.8767	50	6.66	0	-2.26957	5.72907e-07	1.82841	2.71745e-12	-1.02181	0.000413412
ENSDARG00000102998	taf6	ENSMUSG00000036980	Taf6	ortholog_one2one	71.5409	67.1091	0	90.44	1	-2.26089	1.96785e-06	-0.991427	8.5848e-09	-0.681453	2.96464e-06
ENSDARG00000011594	smarcb1b	ENSMUSG00000000902	Smarcb1	ortholog_one2many	95.1351	91.4286	0	0	0	-2.25759	5.42357e-06	0.508732	1.56586e-06	0.587861	1.71629e-07
ENSDARG00000034409	pik3r3b	ENSMUSG00000028698	Pik3r3	ortholog_many2many	50.4505	36.4425	50	86.78	1	-2.25328	1.64164e-09	0.293671	4.72863e-05	0.80026	2.96186e-12
ENSDARG00000100244	ebf3a	ENSMUSG00000010476	Ebf3	ortholog_one2one	96.741	94.6309	50	100	1	-2.23812	2.73472e-07	-1.04108	0.00848766	1.29847	1.75288e-06
ENSDARG00000056491	ikzf5	ENSMUSG00000040167	Ikzf5	ortholog_one2one	67.5418	67.5418	0	99.56	1	-2.23184	6.13071e-06	-1.34558	3.30071e-14	-1.07579	2.18088e-12
ENSDARG00000033889	spty2d1	ENSMUSG00000049516	Spty2d1	ortholog_one2one	42.4051	39.2962	50	30.67	0	-2.22501	1.85547e-07	0.27032	0.000298068	-0.259065	0.000614652
ENSDARG00000061504	kdm4c	ENSMUSG00000028397	Kdm4c	ortholog_one2one	40.3509	56.7362	0	32.82	0	-2.22388	2.49263e-05	-0.101574	0.0713524	0.000508494	1
ENSDARG00000056427	auts2a	ENSMUSG00000029673	Auts2	ortholog_one2many	60.0739	64.1658	0	61.4	0	-2.19967	7.8793e-06	1.25579	2.32541e-16	1.31394	1.2781e-16
ENSDARG00000088630	arhgef10la	ENSMUSG00000040964	Arhgef10l	ortholog_one2many	54.8188	55.5469	50	0.56	0	-2.19794	1.74149e-05	0.00660345	1	0.0863483	0.483335
ENSDARG00000102171	fnip1	ENSMUSG00000035992	Fnip1	ortholog_one2one	66.3881	61.3734	0	77.12	1	-2.19054	2.85862e-05	-1.10361	4.00659e-06	-0.205368	0.245401
ENSDARG00000044281	erbb2ip	ENSMUSG00000021709	Erbin	ortholog_one2one	62.0839	59.1724	50	93.65	1	-2.18903	1.06731e-05	0.982852	9.59438e-09	0.830915	1.91011e-07
ENSDARG00000076560	apbb1	ENSMUSG00000037032	Apbb1	ortholog_one2one	48.5915	48.5915	0	19.85	0	-2.18704	1.16304e-06	-0.652635	8.29266e-15	0.00830969	0.902762
ENSDARG00000090770	RNF31	ENSMUSG00000047098	Rnf31	ortholog_one2one	44.0367	40.5253	0	26.83	0	-2.18286	2.94355e-07	0.814253	2.91718e-10	1.2944	3.6814e-14
ENSDARG00000036057	tradd	ENSMUSG00000031887	Tradd	ortholog_one2one	41.6382	39.3548	25	17.7	0	-2.17476	1.48584e-08	1.46495	2.27387e-09	0.982836	2.27126e-06
ENSDARG00000042977	nfil3	ENSMUSG00000056749	Nfil3	ortholog_one2one	48.2906	48.9177	100	88.13	0	-2.15002	1.59061e-05	1.28647	0.00153738	1.4671	0.000397003
ENSDARG00000027465	rmnd1	ENSMUSG00000019763	Rmnd1	ortholog_one2one	56.8293	51.7778	75	4.04	1	-2.14794	4.8706e-07	-0.0193044	0.862362	0.102645	0.205657
ENSDARG00000009607	ccnc	ENSMUSG00000028252	Ccnc	ortholog_one2one	92.9329	92.9329	0	61.15	0	-2.14261	1.70001e-07	-1.00556	7.7423e-12	-0.433371	7.0909e-06
ENSDARG00000041870	ift172	ENSMUSG00000038564	Ift172	ortholog_one2one	75.1862	75.0143	0	97.92	1	-2.12278	1.13904e-05	-0.316101	0.00369135	-0.0336364	0.804096
ENSDARG00000069266	esrra	ENSMUSG00000024955	Esrra	ortholog_one2one	62.585	65.4028	25	97.04	1	-2.12249	1.65079e-08	0.824237	4.43428e-06	-0.645971	0.000387207
ENSDARG00000060980	atp8b1	ENSMUSG00000039529	Atp8b1	ortholog_one2one	67.2538	67.1463	0	3.51	0	-2.12051	0.000240874	1.09793	3.72282e-07	-0.224648	0.275536
ENSDARG00000030335	zc3h10	ENSMUSG00000039810	Zc3h10	ortholog_one2one	55.268	68.7356	25	56.42	0	-2.1142	4.13409e-05	0.131655	0.216832	-0.221574	0.036013
ENSDARG00000061095	stk36	ENSMUSG00000033276	Stk36	ortholog_one2one	32.0065	29.9392	0	22.08	0	-2.11326	2.51405e-06	0.870598	2.49071e-06	-0.28769	0.138091
ENSDARG00000010519	per3	ENSMUSG00000028957	Per3	ortholog_one2one	34.5824	39.8023	50	12.53	0	-2.10907	3.23061e-05	1.74811	1.73815e-14	1.67561	5.81213e-14
ENSDARG00000101361	znf644a	ENSMUSG00000049606	Zfp644	ortholog_one2many	23.4388	21.2074	25	0.55	0	-2.10244	3.87119e-06	-0.265298	0.0101981	-0.107148	0.306458
ENSDARG00000003877	pbrm1	ENSMUSG00000042323	Pbrm1	ortholog_one2many	67.873	62.7347	50	10.26	0	-2.09452	7.90677e-05	0.328302	7.10085e-07	0.902378	7.93379e-15
ENSDARG00000038068	ddx5	ENSMUSG00000020719	Ddx5	ortholog_one2one	75.5267	75.7724	50	35.7	0	-2.08842	1.32058e-07	-0.363241	6.39006e-08	-0.320332	4.83436e-07
ENSDARG00000076171	znf827	ENSMUSG00000071064	Zfp827	ortholog_one2one	53.6522	57.2356	75	66.11	1	-2.06977	1.48588e-06	-0.850466	5.05959e-06	-1.87837	5.56686e-10
ENSDARG00000009953	med14	ENSMUSG00000064127	Med14	ortholog_one2one	79.5215	77.4503	0	59.05	0	-2.06108	1.3593e-05	0.348554	4.56885e-05	0.516828	1.49816e-07
ENSDARG00000079067	mms19	ENSMUSG00000025159	Mms19	ortholog_one2one	55.8071	54.9952	50	26.66	0	-2.06098	0.00196395	-0.736962	0.243602	-0.556738	0.319267
ENSDARG00000005416	map3k5	ENSMUSG00000071369	Map3k5	ortholog_one2one	71.1877	70.3623	0	40.46	0	-2.06097	4.74e-06	2.20744	2.01007e-09	1.91633	4.11085e-08
ENSDARG00000031915	hif1an	ENSMUSG00000036450	Hif1an	ortholog_one2one	80.814	79.6562	25	48.46	0	-2.0522	5.81771e-08	-0.286298	0.000216775	-0.531264	4.80725e-08
ENSDARG00000055283	id2a	ENSMUSG00000020644	Id2	ortholog_one2one	75.1825	76.8657	50	95.36	1	-2.03873	1.24023e-05	0.661776	6.2164e-05	0.720014	2.28369e-05
ENSDARG00000022944	ecd	ENSMUSG00000021810	Ecd	ortholog_one2one	47.943	47.2699	0	84.7	0	-2.03505	9.92592e-06	-1.97292	6.55614e-19	-1.99785	9.18031e-19
ENSDARG00000030905	cited2	ENSMUSG00000039910	Cited2	ortholog_one2one	68.7783	56.5056	75	51.16	1	-2.02695	7.23093e-08	0.659924	0.000289921	0.379807	0.0239786
ENSDARG00000103290	CABZ01085924.1	ENSMUSG00000006050	Sra1	ortholog_one2many	50.2083	49.5885	0	0	0	-2.02636	9.8802e-07	-0.62568	1.09879e-12	-0.750756	4.11969e-14
ENSDARG00000026759	ldlrb	ENSMUSG00000032193	Ldlr	ortholog_one2many	57.0115	57.5406	0	2.23	0	-2.0249	2.4185e-05	-0.0791407	0.622169	1.14006	2.05043e-08
ENSDARG00000044153	ppp1cb	ENSMUSG00000014956	Ppp1cb	ortholog_one2one	97.5535	97.5535	25	55.35	0	-2.02428	2.44607e-06	-2.12328	8.58485e-19	-1.26268	2.68908e-14
ENSDARG00000061687	atxn1a	ENSMUSG00000046876	Atxn1	ortholog_one2many	46.735	45.6821	25	98.11	0	-2.01798	3.71656e-06	-0.643419	0.0772757	0.403941	0.160585
ENSDARG00000098903	tfe3a	ENSMUSG00000000134	Tfe3	ortholog_one2many	57.5139	54.1958	0	17.34	0	-2.01453	5.51284e-06	-0.0422258	0.714185	-0.530487	1.49013e-05
ENSDARG00000051785	dhx33	ENSMUSG00000040620	Dhx33	ortholog_one2one	72.0588	70.2006	0	99.03	1	-2.00906	0.00100053	0.0704743	0.522072	-0.639075	3.49968e-06
ENSDARG00000075819	arhgef2	ENSMUSG00000028059	Arhgef2	ortholog_one2many	55.3899	49.0355	0	19.97	0	-1.99871	5.21211e-05	0.390349	2.42886e-06	0.117585	0.0864255
ENSDARG00000018411	mknk1	ENSMUSG00000028708	Mknk1	ortholog_one2one	68.4096	75.6627	50	66.58	0	-1.98885	0.00051396	-0.94577	9.86215e-11	-0.681649	2.74623e-08
ENSDARG00000038835	ppid	ENSMUSG00000027804	Ppid	ortholog_one2one	71.4286	71.6216	75	96.22	1	-1.98816	2.23444e-07	-0.753562	7.4357e-15	-1.27554	4.72583e-19
ENSDARG00000058475	ern2	ENSMUSG00000030866	Ern2	ortholog_one2one	50.5933	51.4819	50	5.2	0	-1.98803	1.30442e-07	0	1	0	1
ENSDARG00000100854	ago4	ENSMUSG00000042500	Ago4	ortholog_one2one	95.4037	89.1986	0	47.28	0	-1.98606	0.00060819	-3.18212	1.92756e-18	-1.87114	2.06904e-15
ENSDARG00000016177	eif4enif1	ENSMUSG00000020454	Eif4enif1	ortholog_one2one	55.0847	52.8993	50	64.99	0	-1.98396	4.09582e-07	-0.0313953	0.723317	-1.17104	1.8165e-13
ENSDARG00000033861	sepsecs	ENSMUSG00000029173	Sepsecs	ortholog_one2one	74.898	72.8175	50	100	1	-1.98117	1.80846e-06	0.606158	0.000106335	-0.311633	0.0394052
ENSDARG00000004060	bhlhe40	ENSMUSG00000030103	Bhlhe40	ortholog_one2one	61.0422	59.854	50	50.79	0	-1.97748	4.1024e-06	0.954322	8.63483e-09	1.17226	2.31693e-10
ENSDARG00000013500	abca2	ENSMUSG00000026944	Abca2	ortholog_one2one	75.869	78.0518	50	53.87	0	-1.97328	2.82051e-06	0.772117	2.38203e-05	1.04549	2.44851e-07
ENSDARG00000102645	usp47	ENSMUSG00000059263	Usp47	ortholog_one2one	81.0771	80.9593	50	98.29	1	-1.97206	0.000497379	-0.160654	0.00630996	-0.308416	8.29803e-06
ENSDARG00000103926	inpp5e	ENSMUSG00000026925	Inpp5e	ortholog_one2one	52.044	51.1592	25	7.63	0	-1.97124	0.000837991	-0.248986	0.245117	-0.514057	0.0169036
ENSDARG00000090617	ctif	ENSMUSG00000052928	Ctif	ortholog_one2one	56.8452	61.3162	75	65.56	1	-1.96658	4.04537e-06	-0.120189	0.796891	0.458186	0.103976
ENSDARG00000055064	prdx5	ENSMUSG00000024953	Prdx5	ortholog_one2one	54.2105	49.0476	25	36.71	0	-1.96156	7.5527e-09	0.306175	3.98272e-06	-0.127037	0.0217123
ENSDARG00000029331	atxn7l3	ENSMUSG00000059995	Atxn7l3	ortholog_many2many	86.2857	42.6554	75	100	1	-1.95037	4.48231e-05	-0.00140627	1	0.605707	1.18555e-05
ENSDARG00000045465	lancl2	ENSMUSG00000062190	Lancl2	ortholog_one2one	69.4253	67.1111	25	93.48	1	-1.95002	5.41282e-07	-0.904966	1.20618e-15	0.176056	0.000485922
ENSDARG00000035187	abl1	ENSMUSG00000026842	Abl1	ortholog_one2one	71.2303	67.4256	25	97.72	1	-1.94271	3.97838e-06	2.03756	9.0788e-17	1.26825	1.31516e-11
ENSDARG00000100494	pbx1a	ENSMUSG00000052534	Pbx1	ortholog_one2many	92.757	92.3256	0	29.35	0	-1.92404	1.92318e-07	-0.224883	0.0283521	0.107968	0.306165
ENSDARG00000063258	rfx5	ENSMUSG00000005774	Rfx5	ortholog_one2one	36.2712	32.5228	0	7.15	0	-1.92304	0.00296911	0.131245	0.407429	-1.00487	2.68269e-06
ENSDARG00000055124	ccnl1a	ENSMUSG00000027829	Ccnl1	ortholog_one2many	66.4659	62.218	25	87.83	1	-1.91771	1.53304e-07	-0.499739	7.31991e-08	-0.62991	1.6021e-09
ENSDARG00000102802	brdt	ENSMUSG00000029279	Brdt	ortholog_one2one	32.5709	37.2385	75	19.37	0	-1.90885	7.13526e-06	0	0.0120577	0	0.0619078
ENSDARG00000059474	mlxip	ENSMUSG00000038342	Mlxip	ortholog_one2one	49.8237	46.2377	0	36.01	0	-1.90689	5.47086e-06	-1.51739	8.72584e-19	-1.07481	8.80311e-16
ENSDARG00000068992	hspa8	ENSMUSG00000015656	Hspa8	ortholog_one2many	93.8367	94.2724	25	98.79	1	-1.90551	2.76676e-06	-0.628192	0.22185	-1.25241	0.0133933
ENSDARG00000015653	tnip1	ENSMUSG00000020400	Tnip1	ortholog_one2one	40.7351	41.1128	50	36.27	0	-1.90498	3.88574e-06	1.39276	1.85543e-09	-0.29794	0.0788446
ENSDARG00000035391	ptcd2	ENSMUSG00000021650	Ptcd2	ortholog_one2one	41.9271	42.2572	75	2.89	0	-1.90079	7.37652e-05	-0.424852	0.000430812	-0.231949	0.040979
ENSDARG00000015566	dnmt3ab	ENSMUSG00000020661	Dnmt3a	ortholog_one2many	64.9284	69.9339	50	9.04	0	-1.90076	5.69411e-06	0.618501	5.1433e-08	0.95656	1.11383e-11
ENSDARG00000045636	rbl2	ENSMUSG00000031666	Rbl2	ortholog_one2one	62.1872	59.1189	0	45.23	0	-1.89996	0.00126264	0.913702	4.94871e-09	0.643011	1.87236e-06
ENSDARG00000041802	rnf141	ENSMUSG00000030788	Rnf141	ortholog_one2one	77.9279	75.2174	50	81.5	1	-1.89833	0.00456019	-0.870293	2.07216e-12	-0.805615	1.09216e-11
ENSDARG00000100136	dcp1a	ENSMUSG00000021962	Dcp1a	ortholog_one2one	44.8747	32.7243	0	21.1	0	-1.89517	0.00219587	-0.0327218	0.748584	-1.46608	1.00054e-13
ENSDARG00000076903	bend3	ENSMUSG00000038214	Bend3	ortholog_one2one	52.2059	51.6364	75	52.61	1	-1.89411	2.61362e-06	0.971454	0.00153934	-0.461231	0.30528
ENSDARG00000013004	tdg.1	ENSMUSG00000034674	Tdg	ortholog_one2many	50.995	48.6936	25	74.85	1	-1.89254	1.4769e-06	-1.04678	4.05533e-15	-0.471805	8.67637e-09
ENSDARG00000074303	phf12a	ENSMUSG00000037791	Phf12	ortholog_one2many	56.443	52.8415	50	52.54	0	-1.8924	7.29639e-06	0.141759	0.423605	-0.192163	0.223337
ENSDARG00000015681	gsk3ab	ENSMUSG00000057177	Gsk3a	ortholog_one2many	71.645	67.551	25	3.27	0	-1.89143	0.000690305	0.401862	1.29034e-06	0.101501	0.136522
ENSDARG00000091001	mycbp	ENSMUSG00000028647	Mycbp	ortholog_one2one	51.6393	61.165	0	13.7	0	-1.88423	5.74002e-08	-0.805419	2.6094e-11	-1.19508	1.98414e-14
ENSDARG00000033160	nr1d1	ENSMUSG00000020889	Nr1d1	ortholog_one2one	56.3579	58.374	0	44.5	0	-1.88379	2.73708e-07	0.0187916	0.969764	0.34522	0.0154635
ENSDARG00000069706	prmt6	ENSMUSG00000049300	Prmt6	ortholog_one2one	54.6479	51.3228	50	89.18	1	-1.87647	0.0138214	-1.09371	5.86347e-10	-0.755071	2.29147e-07
ENSDARG00000057513	mdm4	ENSMUSG00000054387	Mdm4	ortholog_one2one	45.5645	46.1224	25	2.66	0	-1.87595	3.82427e-07	-0.588323	1.04139e-06	0.668023	1.12917e-08
ENSDARG00000076297	nfatc3a	ENSMUSG00000031902	Nfatc3	ortholog_one2many	58.9385	58.829	50	47.58	0	-1.87488	1.50203e-06	-0.598524	2.64781e-07	-0.574624	4.76461e-07
ENSDARG00000090326	MAPK8IP1 (1 of many)	ENSMUSG00000027223	Mapk8ip1	ortholog_one2many	43.7418	46.959	0	42.86	0	-1.87447	0.00326652	0.5187	2.99976e-05	0.322071	0.00459706
ENSDARG00000033855	rqcd1	ENSMUSG00000026174	Cnot9	ortholog_one2one	96.3087	95.9866	25	14.01	0	-1.86725	0.000202483	-0.981948	5.21144e-11	-0.799847	2.09259e-09
ENSDARG00000022280	brd2a	ENSMUSG00000024335	Brd2	ortholog_one2many	60.3365	62.9073	25	44.93	0	-1.86585	3.66328e-06	0.408397	0.00134696	0.722656	1.23079e-06
ENSDARG00000016527	helz2	ENSMUSG00000027580	Helz2	ortholog_one2many	35.4908	33.4917	25	29.41	0	-1.8625	0.0186647	0	1.65188e-05	0	0.110029
ENSDARG00000004939	mtdhb	ENSMUSG00000022255	Mtdh	ortholog_one2many	36.0958	33.8515	0	0	0	-1.85964	4.3763e-06	-0.103477	0.0386059	0.386867	2.09444e-08
ENSDARG00000054562	her15.1	ENSMUSG00000048001	Hes5	ortholog_one2many	41.9355	38.9222	0	33.72	0	-1.85897	0.00922031	0	1.46358e-11	0	2.44888e-11
ENSDARG00000020944	ezra	ENSMUSG00000052397	Ezr	ortholog_one2many	74.4538	75.5973	25	45.12	0	-1.85708	0.00303683	1.80907	1.03339e-18	0.934792	7.07624e-13
ENSDARG00000069157	tmem135	ENSMUSG00000039428	Tmem135	ortholog_one2one	74.1936	75.3275	50	100	1	-1.85701	0.000107068	-0.185931	0.0919612	-0.243999	0.0313337
ENSDARG00000037891	mlx	ENSMUSG00000017801	Mlx	ortholog_one2one	75.3036	62.4161	50	45.26	0	-1.853	9.77966e-06	-0.169713	0.0323324	-0.569726	1.00971e-07
ENSDARG00000032103	mapk6	ENSMUSG00000042688	Mapk6	ortholog_one2one	74.3484	75.2778	75	100	1	-1.85064	0.0175815	0.0348161	0.713604	0.320994	8.64929e-05
ENSDARG00000073847	rbm15	ENSMUSG00000048109	Rbm15	ortholog_one2one	60.7268	53.8462	75	98.06	1	-1.84432	2.27269e-05	1.20646	2.87909e-06	1.15524	5.7147e-06
ENSDARG00000091652	xrn1	ENSMUSG00000032410	Xrn1	ortholog_one2one	63.6417	62.6814	25	68.08	0	-1.84298	0.127066	1.28223	3.68795e-09	1.34624	1.32694e-09
ENSDARG00000021855	arnt	ENSMUSG00000015522	Arnt	ortholog_one2one	69.3837	44.1214	0	9.08	0	-1.84183	2.2796e-07	-0.08618	0.392008	-0.714043	2.02147e-07
ENSDARG00000034173	prkcq	ENSMUSG00000026778	Prkcq	ortholog_one2one	73.1572	74.3989	100	72.29	1	-1.83624	0.000408414	0.716947	5.84879e-11	0.0832292	0.260899
ENSDARG00000004174	cnot1	ENSMUSG00000036550	Cnot1	ortholog_one2one	90.7751	90.9667	25	99.79	1	-1.83201	0.000122011	0.439514	1.88696e-05	0.585911	2.82671e-07
ENSDARG00000098507	lyar	ENSMUSG00000067367	Lyar	ortholog_one2one	39.2523	32.4742	75	55.92	0	-1.8307	1.20946e-07	-0.087779	0.617487	0.284627	0.0606005
ENSDARG00000026053	hltf	ENSMUSG00000002428	Hltf	ortholog_one2one	54.034	50.7478	25	30.33	0	-1.82204	7.14585e-06	-0.197202	0.00199491	-0.408653	2.96868e-07
ENSDARG00000004297	irf2bpl	ENSMUSG00000034168	Irf2bpl	ortholog_one2one	78.82	67.2258	0	91.58	1	-1.81628	1.07298e-08	1.8639	5.12137e-11	1.77234	1.5819e-10
ENSDARG00000070151	nfyc	ENSMUSG00000032897	Nfyc	ortholog_one2one	81.1111	87.1642	25	96.69	1	-1.81506	1.57277e-07	-0.0630032	0.332639	0.387837	1.20523e-06
ENSDARG00000037203	insig2	ENSMUSG00000003721	Insig2	ortholog_one2one	80.543	79.1111	50	66.96	0	-1.8141	0.00286785	0.652119	0.00685081	0.522237	0.0283539
ENSDARG00000017661	braf	ENSMUSG00000002413	Braf	ortholog_one2one	82.3745	83.7065	50	6.36	0	-1.8125	0.000738184	-0.792678	2.19068e-12	-0.494512	7.81633e-09
ENSDARG00000019995	bmp4	ENSMUSG00000021835	Bmp4	ortholog_one2one	71.25	69.8529	50	50.63	0	-1.81091	3.86236e-08	3.34745	1.35503e-24	0.8457	2.1672e-12
ENSDARG00000019726	celsr2	ENSMUSG00000068740	Celsr2	ortholog_one2one	58.9711	31.4149	0	80.04	1	-1.8101	0.00352538	-0.619411	1.73065e-06	1.16515	3.1856e-13
ENSDARG00000021225	prkci	ENSMUSG00000037643	Prkci	ortholog_one2one	89.6258	88.5714	50	5.1	0	-1.80986	2.64155e-05	1.02315	1.38308e-12	0.429471	6.32411e-06
ENSDARG00000003984	LTN1	ENSMUSG00000052299	Ltn1	ortholog_one2one	52.2559	51.7827	0	86.24	1	-1.80651	0.0149809	-0.0479857	0.639516	0.296211	0.000695403
ENSDARG00000098280	rbm5	ENSMUSG00000032580	Rbm5	ortholog_one2one	56.799	57.9141	0	9.41	0	-1.7901	3.75053e-07	-0.744533	8.80675e-13	-0.369041	2.28258e-07
ENSDARG00000037196	arid5b	ENSMUSG00000019947	Arid5b	ortholog_one2one	48.2759	42.4242	50	38.03	0	-1.7836	0.000231718	3.45081	2.09355e-16	1.95181	2.66474e-09
ENSDARG00000055548	npat	ENSMUSG00000033054	Npat	ortholog_one2one	33.8931	31.2676	0	23.66	0	-1.77347	3.51023e-05	-0.704694	4.01159e-09	-0.452014	3.42773e-06
ENSDARG00000045150	csnk1e	ENSMUSG00000022433	Csnk1e	ortholog_one2one	84.1727	84.375	50	53.06	0	-1.76807	7.29189e-05	1.22622	4.84053e-11	1.09862	5.28921e-10
ENSDARG00000010717	chchd10	ENSMUSG00000049422	Chchd10	ortholog_one2one	61.5385	63.7681	50	77.03	1	-1.76478	3.14866e-05	0.397044	0.000246814	0.122323	0.220826
ENSDARG00000018721	npnt	ENSMUSG00000040998	Npnt	ortholog_one2many	39.1111	14.4499	75	53.36	1	-1.76184	0.00204481	2.82819	6.73017e-16	1.89744	8.84941e-12
ENSDARG00000004074	bach2b	ENSMUSG00000040270	Bach2	ortholog_one2one	57.8372	56.7342	100	40.24	1	-1.76022	0.000924944	0	0.00448097	0	0.000544679
ENSDARG00000103697	arnt2	ENSMUSG00000015709	Arnt2	ortholog_one2one	82.2493	85.2528	100	49.33	1	-1.76022	5.33794e-06	0	1.90024e-14	0	1.48297e-13
ENSDARG00000052139	notch3	ENSMUSG00000038146	Notch3	ortholog_one2one	55.9157	59.5341	0	18.76	0	-1.76005	0.0121759	1.78069	5.23415e-05	1.78875	4.92065e-05
ENSDARG00000045249	nif3l1	ENSMUSG00000026036	Nif3l1	ortholog_one2one	46.9741	43.3511	0	68.46	0	-1.75833	0.00371661	0.0536791	0.659774	0.609478	3.06114e-06
ENSDARG00000101387	CAMK2N1	ENSMUSG00000046447	Camk2n1	ortholog_one2one	56.5789	55.1282	0	85.24	1	-1.75815	0.000721704	-1.55642	3.44401e-11	0.299411	0.00952492
ENSDARG00000010571	ezh2	ENSMUSG00000029687	Ezh2	ortholog_one2one	83.9474	85.5228	75	85.54	1	-1.75261	2.14343e-06	0.254944	0.255523	0.547714	0.0120439
ENSDARG00000035622	xbp1	ENSMUSG00000020484	Xbp1	ortholog_one2one	28.9744	42.3221	50	55.89	0	-1.74366	1.68287e-05	0.251396	0.0245236	0.287089	0.0110238
ENSDARG00000043970	lrpprc	ENSMUSG00000024120	Lrpprc	ortholog_one2one	46.9541	49.2816	100	26.56	0	-1.74091	0.00420741	-0.492377	2.22244e-07	-1.02056	1.2592e-12
ENSDARG00000060103	cpeb3	ENSMUSG00000039652	Cpeb3	ortholog_one2one	79.803	67.8771	75	43.73	1	-1.74038	6.4339e-05	-1.37104	3.55132e-15	-0.0370471	0.60532
ENSDARG00000062846	tmtc3	ENSMUSG00000036676	Tmtc3	ortholog_one2one	72.3176	73.2609	50	93.32	1	-1.73669	0.000680914	-1.45914	5.23813e-20	-0.279543	4.74334e-07
ENSDARG00000102997	rrn3	ENSMUSG00000022682	Rrn3	ortholog_one2one	62.2549	58.0793	0	31.66	0	-1.7297	8.91789e-06	-0.517154	0.000263129	-0.763112	2.41805e-06
ENSDARG00000036852	DXO	ENSMUSG00000040482	Dxo	ortholog_one2one	48.0702	34.5088	0	36.66	0	-1.72557	0.000790092	-0.383743	5.41949e-05	-1.14963	1.59761e-12
ENSDARG00000056079	l3mbtl2	ENSMUSG00000022394	L3mbtl2	ortholog_one2one	44.7205	48.7145	75	21.78	0	-1.72521	0.000103205	-0.669207	4.39052e-06	0.372209	0.00208309
ENSDARG00000053574	fancd2	ENSMUSG00000034023	Fancd2	ortholog_one2one	49.2734	49.1034	0	23.69	0	-1.72048	0.00447664	2.61039	2.22729e-09	1.69518	7.68475e-05
ENSDARG00000041621	bbs2	ENSMUSG00000031755	Bbs2	ortholog_one2one	73.1469	72.5381	50	100	1	-1.72046	4.14768e-05	-0.0616974	0.39016	-0.884927	8.70681e-12
ENSDARG00000015206	hnrnpua	ENSMUSG00000039630	Hnrnpu	ortholog_one2many	55.9045	55.625	50	1.24	0	-1.71659	7.18653e-05	0.203057	0.00265875	0.0790599	0.230954
ENSDARG00000036685	ccnt2a	ENSMUSG00000026349	Ccnt2	ortholog_one2many	60.2812	47.4412	75	84.08	1	-1.71544	2.27778e-07	-0.304559	9.78484e-07	-0.576214	3.02938e-11
ENSDARG00000058004	six2a	ENSMUSG00000024134	Six2	ortholog_one2one	89.5833	87.1622	75	57.38	1	-1.71519	1.19996e-08	1.66302	1.2751e-18	2.38741	1.72385e-21
ENSDARG00000088354	si:ch73-49k18.1	ENSMUSG00000063268	Parp10	ortholog_one2many	5.34759	2.08333	25	2.37	0	-1.71502	3.05082e-05	2.71313	1.83464e-08	1.55876	0.00140611
ENSDARG00000014428	ppp2r5d	ENSMUSG00000059409	Ppp2r5d	ortholog_one2one	81.141	86.1953	25	5.71	0	-1.71472	1.49468e-06	-0.0133258	0.914044	-0.443495	1.75579e-06
ENSDARG00000098235	actr5	ENSMUSG00000037761	Actr5	ortholog_one2one	55.7432	54.2763	0	82.37	1	-1.71247	0.000257456	0.0962592	0.43956	0.0218261	1
ENSDARG00000017220	otud7b	ENSMUSG00000038495	Otud7b	ortholog_one2one	58.8235	64.2857	50	88.89	1	-1.70676	0.000279403	-0.818397	2.37719e-08	0.107293	0.28336
ENSDARG00000012248	rgma	ENSMUSG00000070509	Rgma	ortholog_one2one	62.5835	61.8943	50	89.9	1	-1.68945	0.00893226	1.92074	3.62874e-12	0.869863	3.00107e-05
ENSDARG00000099084	pcif1	ENSMUSG00000039849	Pcif1	ortholog_one2one	65.742	67.1388	50	45.37	0	-1.68309	0.000426157	0.0916021	0.133564	-0.093379	0.120897
ENSDARG00000008034	skib	ENSMUSG00000029050	Ski	ortholog_one2many	60.5755	57.9092	0	0.11	0	-1.68193	1.70683e-06	1.63868	1.13658e-10	0.96816	1.85748e-06
ENSDARG00000034043	irx5a	ENSMUSG00000031737	Irx5	ortholog_one2many	67.0404	61.7769	100	50.5	1	-1.67977	1.1036e-06	1.36642	2.22381e-19	1.41831	1.98357e-19
ENSDARG00000042456	MAD2L2	ENSMUSG00000029003	Mad2l2	ortholog_one2one	83.8863	83.8863	0	98.61	1	-1.67753	0.000175928	0.315521	1.29579e-11	-0.282398	1.19906e-10
ENSDARG00000036482	hexim1	ENSMUSG00000048878	Hexim1	ortholog_one2one	43.5737	39.0449	50	60.12	0	-1.67677	1.7951e-07	-0.329721	0.00645767	-0.174627	0.129731
ENSDARG00000067801	SEMA4D	ENSMUSG00000021451	Sema4d	ortholog_one2one	48.3645	48.0836	0	60.84	0	-1.67487	0.000150715	0.553135	3.26877e-09	-0.221469	0.0019221
ENSDARG00000004851	hinfp	ENSMUSG00000032119	Hinfp	ortholog_one2one	57.9055	56.0636	75	40.26	1	-1.67394	2.57737e-05	-0.0717707	0.63562	0	2.41604e-15
ENSDARG00000055563	rnasen	ENSMUSG00000022191	Drosha	ortholog_one2one	80.1396	75.2367	0	93.36	1	-1.67276	0.000902622	-0.0182567	0.93585	-0.313035	0.00372933
ENSDARG00000100908	lcor	ENSMUSG00000025019	Lcor	ortholog_one2one	43.9236	58.4296	50	92.95	0	-1.67261	8.85803e-06	-0.713749	9.94058e-07	-0.164441	0.120683
ENSDARG00000018559	kdm7ab	ENSMUSG00000042599	Kdm7a	ortholog_one2many	55.2775	54.0426	0	32.47	0	-1.67214	1.51382e-06	-1.46098	4.9321e-10	-0.687305	1.19494e-05
ENSDARG00000054378	pcbp3	ENSMUSG00000001120	Pcbp3	ortholog_one2one	86.5714	81.6712	25	33.79	0	-1.66903	0.0310922	-2.17164	2.45623e-21	-2.33098	1.54175e-21
ENSDARG00000102963	sirt6	ENSMUSG00000034748	Sirt6	ortholog_one2one	57.0447	49.7006	0	50.73	0	-1.66817	8.61094e-07	0.454434	0.00309831	0.508632	0.000968061
ENSDARG00000059461	mepce	ENSMUSG00000029726	Mepce	ortholog_one2many	46.2639	43.6937	0	4.31	0	-1.66633	0.000135683	-0.216166	0.0107279	0.713887	2.28545e-09
ENSDARG00000079688	tnrc6a	ENSMUSG00000052707	Tnrc6a	ortholog_one2one	57.8409	53.692	50	91.37	1	-1.66429	2.98988e-07	-0.245628	0.00433343	-0.115595	0.160772
ENSDARG00000011851	map2k5	ENSMUSG00000058444	Map2k5	ortholog_one2one	76.8889	77.2321	50	35.72	0	-1.6618	1.00069e-06	-0.0129756	0.942208	0.065726	0.51093
ENSDARG00000038121	si:ch211-13k12.2	ENSMUSG00000027246	Ell3	ortholog_one2one	19.7302	29.6203	25	3.04	0	-1.65315	0.00122541	-0.365505	0.00122699	-0.109392	0.295936
ENSDARG00000075014	sqstm1	ENSMUSG00000015837	Sqstm1	ortholog_one2one	47.5664	48.6425	50	46.93	0	-1.64844	8.47508e-07	1.20073	5.69475e-19	0.448209	1.6075e-10
ENSDARG00000034117	rarga	ENSMUSG00000001288	Rarg	ortholog_one2many	70.5411	76.8559	25	0.33	0	-1.64812	9.12478e-06	1.74486	6.50713e-14	1.33867	2.51997e-11
ENSDARG00000079886	otulinb	ENSMUSG00000046034	Otulin	ortholog_one2many	33.0073	38.3523	25	0	0	-1.64163	0.000157587	-0.116169	0.0428269	-0.0992025	0.0866488
ENSDARG00000043250	ppm1ab	ENSMUSG00000021096	Ppm1a	ortholog_one2many	73.3871	71.466	50	0	0	-1.64117	1.33793e-05	0.318237	7.9905e-06	0.721516	9.21845e-12
ENSDARG00000012887	znf143a	ENSMUSG00000061079	Zfp143	ortholog_one2many	69.5518	70.6436	50	0	0	-1.6397	0.000269268	-1.03453	6.20095e-09	-1.38069	6.72147e-11
ENSDARG00000076763	sp2	ENSMUSG00000018678	Sp2	ortholog_one2one	60.3279	60.0326	0	49.35	0	-1.63718	1.71662e-05	0.548016	1.35853e-05	0.673886	7.1861e-07
ENSDARG00000062385	flcn	ENSMUSG00000032633	Flcn	ortholog_one2one	63.6201	61.3126	0	87.94	1	-1.63683	0.00031658	-1.05475	2.62138e-07	-0.877498	3.84257e-06
ENSDARG00000038141	atf4b	ENSMUSG00000042406	Atf4	ortholog_one2many	26.5882	32.3782	0	5.81	0	-1.62886	1.32286e-07	-0.122948	0.0941144	-0.722537	5.77719e-10
ENSDARG00000052728	sltm	ENSMUSG00000032212	Sltm	ortholog_one2one	52.1872	49.7575	100	42.65	1	-1.626	7.89467e-06	-0.361865	8.88793e-07	0.28561	2.18374e-05
ENSDARG00000077101	zbtb10	ENSMUSG00000069114	Zbtb10	ortholog_one2one	55.1724	37.1661	25	10.56	0	-1.62331	0.00201347	0.356721	0.129797	1.37786	3.1919e-08
ENSDARG00000104907	ing2	ENSMUSG00000063049	Ing2	ortholog_one2one	71.5827	70.8185	0	74.21	1	-1.62139	7.81189e-07	0.477313	0.017295	0.900425	3.0358e-05
ENSDARG00000043542	zpr1	ENSMUSG00000032078	Zpr1	ortholog_one2one	70.5215	67.756	0	47.99	0	-1.6156	2.0184e-06	0.2924	0.0217641	-0.337848	0.00940395
ENSDARG00000013058	ascc2	ENSMUSG00000020412	Ascc2	ortholog_one2one	55.4688	56.8758	0	71.09	0	-1.61313	0.00133329	1.51569	4.23827e-16	1.01106	1.78456e-12
ENSDARG00000043134	cux1b	ENSMUSG00000029705	Cux1	ortholog_one2one	56.1012	25.0665	25	34.59	0	-1.61229	0.00469368	0.235352	7.50507e-05	-0.105144	0.0527962
ENSDARG00000019834	edrf1	ENSMUSG00000039990	Edrf1	ortholog_one2one	68.1488	67.9839	50	85.46	1	-1.61143	2.06701e-05	-0.739701	7.91782e-09	-0.643303	7.63743e-08
ENSDARG00000061543	ccdc85b	ENSMUSG00000095098	Ccdc85b	ortholog_one2one	58	57.4257	75	96.37	1	-1.60525	1.37281e-05	-0.338448	0.0170692	-0.438352	0.00321002
ENSDARG00000018025	tbx2a	ENSMUSG00000000093	Tbx2	ortholog_one2many	71.4702	69.0577	25	0	0	-1.60368	4.98223e-09	-2.03396	7.33866e-19	-0.59091	1.2569e-08
ENSDARG00000023495	ift74	ENSMUSG00000028576	Ift74	ortholog_one2one	54.8885	53.3333	25	36.45	0	-1.60349	0.00355753	-0.798384	2.3168e-12	-0.625041	2.40807e-10
ENSDARG00000038397	rpap2	ENSMUSG00000033773	Rpap2	ortholog_one2one	35.2745	34.5277	50	41.36	0	-1.60121	4.09497e-05	-1.17827	3.06113e-15	-1.23782	1.65526e-15
ENSDARG00000074548	zbtb17	ENSMUSG00000006215	Zbtb17	ortholog_one2one	61.215	65.995	50	50.06	0	-1.60089	0.000115842	0.762008	5.62003e-08	0.109713	0.320686
ENSDARG00000038524	pik3r1	ENSMUSG00000041417	Pik3r1	ortholog_one2one	77.8542	78.1768	75	99.01	1	-1.60003	9.00194e-06	0.628789	0.00318444	2.13932	5.02383e-13
ENSDARG00000001729	strn3	ENSMUSG00000020954	Strn3	ortholog_one2one	80.5285	72.7387	100	99.03	1	-1.59871	2.88168e-08	-0.00917589	0.972074	-0.37443	4.75895e-06
ENSDARG00000042892	paip1	ENSMUSG00000025451	Paip1	ortholog_one2one	55.8473	58.5	25	5.21	0	-1.59698	1.22261e-05	-0.0851773	0.0621311	-0.000317354	1
ENSDARG00000032129	gtf2f1	ENSMUSG00000002658	Gtf2f1	ortholog_one2one	67.9104	71.6535	25	39.05	0	-1.59567	0.000152754	-0.707316	0.000829072	-0.302016	0.127272
ENSDARG00000073710	usp7	ENSMUSG00000022710	Usp7	ortholog_one2one	93.2432	93.835	50	49	0	-1.59567	4.42802e-07	-0.629297	1.63151e-10	-0.0469713	0.448517
ENSDARG00000098766	pcxa	ENSMUSG00000024892	Pcx	ortholog_one2many	82.7265	82.8668	25	87.28	1	-1.59275	5.80323e-05	-0.0546292	0.472929	-0.414937	2.80423e-06
ENSDARG00000103578	gtf2b	ENSMUSG00000028271	Gtf2b	ortholog_one2one	93.9873	93.9873	50	11.7	0	-1.5914	3.49266e-05	0.0781323	0.18516	0.0356715	0.578434
ENSDARG00000062621	satb1b	ENSMUSG00000023927	Satb1	ortholog_one2one	70.0721	76.3089	50	100	1	-1.59137	1.5854e-05	-1.32332	1.51668e-12	-0.850055	1.76241e-09
ENSDARG00000036868	tbpl1	ENSMUSG00000071359	Tbpl1	ortholog_one2one	77.4194	77.4194	100	100	1	-1.58795	0.000140283	-1.26559	9.84767e-13	-0.877233	7.92433e-10
ENSDARG00000057997	tmf1	ENSMUSG00000030059	Tmf1	ortholog_one2one	58.326	60.6783	75	80.56	1	-1.58591	5.15911e-05	-1.96906	5.46078e-19	-0.66847	4.48436e-10
ENSDARG00000059760	wdtc1	ENSMUSG00000037622	Wdtc1	ortholog_one2one	79.2285	78.8774	25	30.97	0	-1.58233	9.23718e-06	0.396388	0.0540545	0.140497	0.584189
ENSDARG00000079020	gcfc2	ENSMUSG00000035125	Gcfc2	ortholog_one2one	29.3689	31.4694	25	11.38	0	-1.57813	0.000351001	-0.450362	0.00384149	0.642073	4.72419e-05
ENSDARG00000099640	eed	ENSMUSG00000030619	Eed	ortholog_one2one	89.3905	89.7959	25	100	1	-1.57353	1.59512e-05	0.541688	4.15539e-09	0.626486	3.39657e-10
ENSDARG00000008818	hsf1	ENSMUSG00000022556	Hsf1	ortholog_one2one	50.8604	52.8827	50	81.97	1	-1.57114	0.000156431	-0.385878	2.75373e-08	0.0780408	0.118662
ENSDARG00000055530	sertad2b	ENSMUSG00000049800	Sertad2	ortholog_one2one	49.3075	57.6052	50	100	0	-1.56368	0.000166976	-0.232386	0.000710056	-0.379875	2.14105e-06
ENSDARG00000037955	pih1d1	ENSMUSG00000003423	Pih1d1	ortholog_one2one	36.9338	36.5517	0	0	0	-1.55273	0.00013386	0.156344	0.0167796	0.0910411	0.162211
ENSDARG00000004785	cops2	ENSMUSG00000027206	Cops2	ortholog_one2one	99.3228	97.7778	50	100	1	-1.55059	4.85176e-07	-0.354489	2.77177e-06	-0.650671	1.47865e-10
ENSDARG00000070472	Arf5	ENSMUSG00000021877	Arf4	ortholog_one2many	61.7647	70	0	26.24	0	-1.5501	8.6152e-06	1.28118	6.22592e-17	1.06077	3.86074e-15
ENSDARG00000003699	atp7a	ENSMUSG00000033792	Atp7a	ortholog_one2one	64.2	64.5442	0	90.26	1	-1.54874	0.040196	0.581607	2.64454e-06	0.762647	2.68159e-08
ENSDARG00000061992	dot1l	ENSMUSG00000061589	Dot1l	ortholog_one2one	52.6592	52.0779	0	52.88	0	-1.54572	0.000282104	-0.286743	0.47168	0.153597	0.670735
ENSDARG00000044090	zmpste24	ENSMUSG00000043207	Zmpste24	ortholog_one2one	77.9915	76.8421	25	86.7	1	-1.53836	0.000641204	0.210099	6.44363e-05	0.0596048	0.205766
ENSDARG00000098272	nipbla	ENSMUSG00000022141	Nipbl	ortholog_one2many	67.8421	57.7555	25	59.58	0	-1.53586	2.22809e-05	-0.527445	1.11461e-06	0.139975	0.0929202
ENSDARG00000074378	junba	ENSMUSG00000052837	Junb	ortholog_one2many	58.1538	54.9419	50	100	1	-1.53309	0.0513241	0.318112	0.00319444	-0.330662	0.00278228
ENSDARG00000026701	gtf2h1	ENSMUSG00000006599	Gtf2h1	ortholog_one2one	75.8182	75.4069	0	52.92	0	-1.52881	8.68397e-05	0.216451	0.00690781	-0.215736	0.00750432
ENSDARG00000006300	psmd9	ENSMUSG00000029440	Psmd9	ortholog_one2one	52.1327	49.5495	0	57.02	0	-1.52136	2.56793e-05	-0.0902178	0.287338	-0.0462621	0.622484
ENSDARG00000069681	pcgf6	ENSMUSG00000025050	Pcgf6	ortholog_one2one	52.7076	41.3598	50	7.77	0	-1.51926	0.000435231	-1.59098	1.22572e-11	-1.49244	3.23372e-11
ENSDARG00000030716	ing4	ENSMUSG00000030330	Ing4	ortholog_one2one	81.6	82.2581	0	64.33	0	-1.51231	8.76371e-08	0.0868647	0.183471	-0.738779	5.31552e-11
ENSDARG00000074204	commd6	ENSMUSG00000075486	Commd6	ortholog_one2one	25.1256	57.4713	50	17.49	0	-1.50423	0.00114259	-0.0457114	0.272649	-0.0568952	0.17264
ENSDARG00000003142	dachc	ENSMUSG00000055639	Dach1	ortholog_one2many	82.4877	67.1105	50	0.22	0	-1.50106	5.60501e-07	-3.10027	1.48668e-21	-1.32837	3.74062e-16
ENSDARG00000074502	zmiz1a	ENSMUSG00000007817	Zmiz1	ortholog_one2many	52.7316	41.4179	50	99.78	1	-1.50011	3.9335e-05	0.165419	0.144305	0.011446	1
ENSDARG00000032116	cnot7	ENSMUSG00000031601	Cnot7	ortholog_one2one	94.7552	95.0877	75	96.94	1	-1.49783	0.000148027	-0.586826	3.56077e-07	-0.834933	1.15068e-09
ENSDARG00000016233	sdr16c5a	ENSMUSG00000028236	Sdr16c5	ortholog_one2many	55.2288	54.6926	50	1.33	0	-1.49661	0.000145293	2.03469	6.71971e-10	2.01274	8.61615e-10
ENSDARG00000003818	prkag1	ENSMUSG00000067713	Prkag1	ortholog_one2one	78.1818	78.1818	0	7.26	0	-1.49219	0.000233333	-0.134529	0.0837116	-0.462499	1.87661e-06
ENSDARG00000036071	gtf2h4	ENSMUSG00000001524	Gtf2h4	ortholog_one2one	76.3949	76.8898	0	17.07	0	-1.48943	0.000160774	-0.131243	0.437545	-0.961532	2.88625e-06
ENSDARG00000052150	pbx4	ENSMUSG00000031860	Pbx4	ortholog_one2many	64.4315	58.4656	0	14.38	0	-1.48934	3.0442e-06	0.63883	0.00542609	0.220357	0.387888
ENSDARG00000052348	smarca5	ENSMUSG00000031715	Smarca5	ortholog_one2one	80.0966	78.8773	0	47.27	0	-1.47239	5.97141e-06	-0.256871	0.0488532	-0.631916	3.54115e-05
ENSDARG00000062445	pias1b	ENSMUSG00000032405	Pias1	ortholog_one2many	77.0865	78.0338	50	36.52	0	-1.46976	9.72598e-05	-0.356603	1.74435e-09	-0.463931	1.62711e-11
ENSDARG00000052091	rbpjb	ENSMUSG00000039191	Rbpj	ortholog_one2many	89.2276	83.4601	50	14.88	0	-1.46354	1.0519e-05	0.683901	3.6206e-06	0.371664	0.00448878
ENSDARG00000055223	ablim2	ENSMUSG00000029095	Ablim2	ortholog_one2one	60.7038	62.3494	25	53.94	0	-1.45681	0.00133029	-2.87162	1.40594e-24	-2.59869	2.79077e-23
ENSDARG00000043680	ylpm1	ENSMUSG00000021244	Ylpm1	ortholog_one2one	38.973	33.7073	0	13.95	0	-1.45618	2.07987e-05	-0.172542	0.215984	-0.0450028	0.801875
ENSDARG00000022978	tmpob	ENSMUSG00000019961	Tmpo	ortholog_one2many	29.1667	15.1515	25	0	0	-1.45506	1.32989e-05	0.791363	2.18336e-06	0.409145	0.00480544
ENSDARG00000063051	bap1	ENSMUSG00000021901	Bap1	ortholog_one2one	63.7086	66.0714	0	57.44	0	-1.45372	0.000521807	-0.656591	5.9804e-10	-1.03366	1.65446e-13
ENSDARG00000036069	ddx39b	ENSMUSG00000019432	Ddx39b	ortholog_one2one	91.4943	92.9907	0	0.68	0	-1.45047	1.04536e-06	0.0365404	0.78139	-0.396101	0.000824286
ENSDARG00000012674	rpusd4	ENSMUSG00000032044	Rpusd4	ortholog_one2many	45.8101	43.5013	0	57.45	0	-1.44815	3.71195e-05	0.0976044	0.349277	-0.470588	0.000110328
ENSDARG00000100536	nkrf	ENSMUSG00000044149	Nkrf	ortholog_one2one	35.8885	44.7826	25	76.22	0	-1.44467	4.02655e-07	-0.92254	6.01667e-05	-2.59481	3.6448e-09
ENSDARG00000006251	ell2	ENSMUSG00000001542	Ell2	ortholog_one2one	52.3664	53.6776	100	58.72	1	-1.44267	0.000657851	0.226528	0.00245169	-0.458931	7.97605e-07
ENSDARG00000017522	ctdp1	ENSMUSG00000033323	Ctdp1	ortholog_one2one	58.0781	57.2917	50	100	1	-1.43857	0.000175762	0.666231	8.13885e-08	-0.0165113	0.982812
ENSDARG00000015006	dnm1l	ENSMUSG00000022789	Dnm1l	ortholog_one2one	87.4126	87.2905	0	100	1	-1.43799	0.000132715	-1.44988	6.73925e-21	-0.86719	2.82394e-16
ENSDARG00000016536	npas2	ENSMUSG00000026077	Npas2	ortholog_one2one	45.0888	46.6912	0	5.76	0	-1.43741	0.116321	-2.09764	2.09355e-16	-1.00407	6.94021e-11
ENSDARG00000061736	ank3a	ENSMUSG00000069601	Ank3	ortholog_one2many	31.4458	66.5477	75	6.18	0	-1.43511	7.12819e-06	-0.975268	5.95977e-12	0.107783	0.10172
ENSDARG00000059406	raf1b	ENSMUSG00000000441	Raf1	ortholog_one2many	78.3784	76.0802	50	28.85	0	-1.43234	0.00020191	-0.106193	0.0371752	-0.12923	0.0131138
ENSDARG00000052114	crtc3	ENSMUSG00000030527	Crtc3	ortholog_one2one	46.6267	50.2423	25	50.28	0	-1.43128	0.00014925	0.328483	0.1006	1.02048	1.04254e-06
ENSDARG00000057167	eif4g2b	ENSMUSG00000005610	Eif4g2	ortholog_one2many	83.6303	82.8918	0	2.78	0	-1.42873	8.46153e-07	0.422714	7.19782e-08	-0.0443934	0.476253
ENSDARG00000060705	nsd1b	ENSMUSG00000021488	Nsd1	ortholog_one2many	43.9936	30.6206	50	1.85	0	-1.42714	1.38057e-05	-0.0257754	0.768835	0.582323	2.07035e-09
ENSDARG00000078095	cipcb	ENSMUSG00000034157	Cipc	ortholog_one2many	32.9114	25.3041	0	17.49	0	-1.42711	0.00205568	-0.0448724	0.554757	0.281017	0.000186011
ENSDARG00000005002	brf1b	ENSMUSG00000011158	Brf1	ortholog_one2one	64.9351	66.568	50	23.02	0	-1.42518	0.00309944	-0.567047	1.07525e-08	-0.487546	1.22169e-07
ENSDARG00000104414	shmt2	ENSMUSG00000025403	Shmt2	ortholog_one2one	72.5051	70.6349	50	40.46	0	-1.42375	0.0140976	-0.0607279	0.537354	0.248646	0.011129
ENSDARG00000091367	prpf6	ENSMUSG00000002455	Prpf6	ortholog_one2one	89.9384	93.0925	0	35.3	0	-1.42358	0.00723086	-0.07296	0.373633	-0.611595	4.32098e-08
ENSDARG00000103787	chd1	ENSMUSG00000023852	Chd1	ortholog_one2one	74.5782	77.4985	0	81.06	1	-1.4222	0.000190741	0.146296	0.145256	0.232298	0.0225147
ENSDARG00000037433	fmr1	ENSMUSG00000000838	Fmr1	ortholog_one2one	71.1775	65.9609	50	78	1	-1.41924	1.98988e-07	-0.139174	0.038224	0.147407	0.0252975
ENSDARG00000067976	ar	ENSMUSG00000046532	Ar	ortholog_one2one	39.6313	38.2647	50	42.56	0	-1.41592	0.000131184	0	0.244695	0	0.530483
ENSDARG00000014498	ythdf2	ENSMUSG00000040025	Ythdf2	ortholog_one2one	70.31	74.4387	0	100	1	-1.41461	1.26979e-05	0.0735376	0.0567363	0.0979357	0.0130471
ENSDARG00000040854	tsg101a	ENSMUSG00000014402	Tsg101	ortholog_one2many	81.7949	81.5857	25	38.1	0	-1.41384	8.17566e-06	0.0735201	0.0363701	-0.192142	5.62418e-06
ENSDARG00000059911	bbs7	ENSMUSG00000037325	Bbs7	ortholog_one2one	75.6643	75.6643	25	79.78	1	-1.41325	1.05887e-07	-1.04382	1.15698e-06	-1.62235	2.065e-09
ENSDARG00000020960	hgs	ENSMUSG00000025793	Hgs	ortholog_one2one	77.4903	77.1907	50	11.32	0	-1.41144	0.000268206	-0.0507479	0.615783	-0.494735	5.63485e-06
ENSDARG00000005980	sfswap	ENSMUSG00000029439	Sfswap	ortholog_one2one	56.3674	57.1429	25	51.46	0	-1.40363	1.21349e-06	-0.0877739	0.419767	-0.411954	0.000441858
ENSDARG00000019717	pbx2	ENSMUSG00000034673	Pbx2	ortholog_one2one	68.5714	66.9767	0	22.01	0	-1.40146	1.50718e-05	0.819534	0.000110197	0.0894476	0.749082
ENSDARG00000005586	zbtb20	ENSMUSG00000022708	Zbtb20	ortholog_one2one	65.2111	60.4588	0	91.33	1	-1.39032	3.29813e-05	1.70918	2.56541e-14	1.78082	1.49864e-14
ENSDARG00000016143	xiap	ENSMUSG00000025860	Xiap	ortholog_one2one	42.9975	35.2823	25	11.49	0	-1.38202	0.000354556	0.0813217	0.830484	0.6267	0.0109487
ENSDARG00000010784	ppp1r12a	ENSMUSG00000019907	Ppp1r12a	ortholog_one2one	63.5631	70.7171	50	33.59	0	-1.38192	2.82071e-07	0.851399	2.35549e-07	1.46707	1.03121e-11
ENSDARG00000071336	mif	ENSMUSG00000033307	Mif	ortholog_one2one	65.2174	65.2174	0	90.26	1	-1.3806	9.65418e-07	1.19378	0.00685049	0.666072	0.124809
ENSDARG00000044925	cdk5rap1	ENSMUSG00000027487	Cdk5rap1	ortholog_one2one	60.4853	59.3537	0	31.93	0	-1.38056	0.000124639	0.615772	0.00122567	0.602021	0.00174374
ENSDARG00000060542	LGR4	ENSMUSG00000050199	Lgr4	ortholog_one2one	57.3635	58.5699	25	90.11	1	-1.37851	0.000885136	-0.88079	0.0535714	0.313092	0.415924
ENSDARG00000028058	traf6	ENSMUSG00000027164	Traf6	ortholog_one2one	56.2731	57.5472	25	50.85	0	-1.37458	0.0396829	0.31783	0.00157368	0.231156	0.0192919
ENSDARG00000069910	gtf2f2a	ENSMUSG00000067995	Gtf2f2	ortholog_one2many	75.0943	79.9197	50	57.95	0	-1.37182	8.43404e-05	-0.00830135	1	-0.170905	0.149603
ENSDARG00000009273	ppm1da	ENSMUSG00000020525	Ppm1d	ortholog_one2many	49.3458	44.1472	50	21.28	0	-1.37041	0.000672541	-0.0920638	0.230659	0.129994	0.0934172
ENSDARG00000022712	stat3	ENSMUSG00000004040	Stat3	ortholog_one2one	84.1191	88.0519	100	93.07	1	-1.36163	0.00567543	0.13839	0.0348339	0.319394	2.46656e-05
ENSDARG00000019774	zhx3	ENSMUSG00000035877	Zhx3	ortholog_one2many	33.0563	37.6446	50	72.55	0	-1.36056	1.82865e-05	2.7538	2.36241e-19	1.95633	7.00903e-16
ENSDARG00000037865	cln3	ENSMUSG00000030720	Cln3	ortholog_one2one	48.6547	49.5434	0	22.46	0	-1.35935	0.00127247	0.817059	7.9551e-14	0.200284	0.000578521
ENSDARG00000037068	IKZF4	ENSMUSG00000002578	Ikzf4	ortholog_one2one	56.1189	54.7782	25	42.88	0	-1.35774	0.000517661	2.34379	2.34338e-11	2.63753	6.85265e-13
ENSDARG00000016086	smurf1	ENSMUSG00000038780	Smurf1	ortholog_one2one	91.2449	91.2449	50	100	1	-1.35519	2.70296e-06	0.53567	0.000289455	0.178457	0.199386
ENSDARG00000018047	brms1lb	ENSMUSG00000012076	Brms1l	ortholog_one2many	79.257	79.257	0	15.05	0	-1.35459	0.000783507	0.155621	0.0604657	0.114743	0.166164
ENSDARG00000054304	homeza	ENSMUSG00000057156	Homez	ortholog_one2many	14.2061	19.6911	25	26.16	0	-1.34452	0.00328863	-0.75209	5.81874e-09	-1.01296	4.53386e-11
ENSDARG00000006192	gatad2ab	ENSMUSG00000036180	Gatad2a	ortholog_one2one	52.5316	52.6984	50	24.81	0	-1.34388	0.000336215	-0.0557185	0.451305	-0.194287	0.00829631
ENSDARG00000005382	prdm9	ENSMUSG00000051977	Prdm9	ortholog_one2one	21.4537	21.6057	0	0	0	-1.33971	0.0452381	-0.535236	0.122176	0.514219	0.0650145
ENSDARG00000079257	gemin5	ENSMUSG00000037275	Gemin5	ortholog_one2one	51.1111	48.9687	50	72.07	0	-1.33532	0.0182308	-0.47339	0.000593747	-0.594749	6.12361e-05
ENSDARG00000069295	bcl6ab	ENSMUSG00000022508	Bcl6	ortholog_one2many	50.9734	40.7355	0	0	0	-1.33368	0.00034986	-0.49406	0.220412	0.0610025	0.96382
ENSDARG00000056856	tax1bp1b	ENSMUSG00000004535	Tax1bp1	ortholog_one2many	46.1055	45.086	75	42.64	1	-1.33316	0.00161476	-0.481185	1.51998e-11	-0.30443	5.38371e-08
ENSDARG00000030155	ssbp3b	ENSMUSG00000061887	Ssbp3	ortholog_one2many	82.235	73.9691	25	7.82	0	-1.33274	3.29368e-06	0.57063	4.38073e-06	0.171599	0.101893
ENSDARG00000059809	caska	ENSMUSG00000031012	Cask	ortholog_one2many	95.1404	95.7609	75	100	1	-1.32906	2.30443e-06	-0.493994	1.08109e-08	0.378639	3.38063e-07
ENSDARG00000058444	snx6	ENSMUSG00000005656	Snx6	ortholog_one2one	91.8919	92.1182	100	67.37	1	-1.32772	3.26089e-07	0.230392	0.00236663	-0.178309	0.0152378
ENSDARG00000056659	ttbk1b	ENSMUSG00000015599	Ttbk1	ortholog_one2many	54.5529	50.841	50	100	1	-1.32599	0.0369068	0	0.838353	0	3.07815e-06
ENSDARG00000044915	sfmbt1	ENSMUSG00000006527	Sfmbt1	ortholog_one2one	61.9816	62.3407	50	15.71	0	-1.32226	0.000323935	-1.32051	2.97153e-09	-0.0477592	0.764272
ENSDARG00000100623	trrap	ENSMUSG00000045482	Trrap	ortholog_one2one	92.3457	92.2017	25	99.9	1	-1.32049	0.00204917	0.481319	4.26062e-05	0.411411	0.000322518
ENSDARG00000074955	nup98	ENSMUSG00000063550	Nup98	ortholog_one2one	62.2797	62.2797	25	100	1	-1.31347	0.000276878	-0.209893	0.101363	0.930678	4.03099e-09
ENSDARG00000005186	sp4	ENSMUSG00000025323	Sp4	ortholog_one2one	66.6667	60.8696	50	87.67	1	-1.31312	4.29575e-06	-0.347867	0.00387441	0.637818	8.71114e-07
ENSDARG00000043094	gnas	ENSMUSG00000027523	Gnas	ortholog_one2one	85.2243	28.5084	50	59.64	0	-1.31057	0.000842515	1.15393	5.29246e-13	0.747206	1.94518e-09
ENSDARG00000077404	ncoa3	ENSMUSG00000027678	Ncoa3	ortholog_one2one	45.9586	49.0378	25	64.95	0	-1.30666	1.92402e-05	0.990807	4.35709e-08	1.39334	5.61862e-11
ENSDARG00000062594	coq7	ENSMUSG00000030652	Coq7	ortholog_one2one	56.5022	37.3887	0	6.39	0	-1.30658	4.46735e-05	-0.0160654	0.9236	-0.256697	0.00647767
ENSDARG00000019874	hsph1	ENSMUSG00000029657	Hsph1	ortholog_one2one	49.3896	51.8648	100	0.59	0	-1.30609	0.00161542	-2.5865	5.01626e-18	-1.62817	4.35514e-14
ENSDARG00000015901	ptbp2b	ENSMUSG00000028134	Ptbp2	ortholog_one2many	79.2969	76.3158	50	26.4	0	-1.30421	3.93033e-05	0.692183	2.25502e-07	0.300548	0.0059469
ENSDARG00000037284	ptges3a	ENSMUSG00000071072	Ptges3	ortholog_one2many	75.4717	75	0	46.98	0	-1.30244	7.06576e-06	-0.148651	0.0343172	-0.200037	0.00591053
ENSDARG00000027777	tnfaip3	ENSMUSG00000019850	Tnfaip3	ortholog_one2one	50.2625	49.4194	0	88.53	1	-1.30223	0.0246919	-1.40994	1.1221e-08	-2.45472	2.52878e-11
ENSDARG00000070846	dazap1	ENSMUSG00000069565	Dazap1	ortholog_one2one	74.7396	70.6897	75	81.92	1	-1.29584	1.3033e-05	-0.44448	0.00767695	0.118256	0.493624
ENSDARG00000098696	rela	ENSMUSG00000024927	Rela	ortholog_one2one	42.517	45.5373	0	42.93	0	-1.29533	0.000484791	0.465144	2.84265e-06	0.0172104	0.911003
ENSDARG00000030756	dnmt1	ENSMUSG00000004099	Dnmt1	ortholog_one2one	65.8	60.9259	75	18.13	1	-1.29521	0.000308996	-0.233369	0.0401829	0.0796845	0.52081
ENSDARG00000057624	cops5	ENSMUSG00000025917	Cops5	ortholog_one2one	95.2096	95.2096	50	80.04	1	-1.2899	6.27931e-06	0.130078	0.0466126	-0.270458	0.000194934
ENSDARG00000059304	chchd2	ENSMUSG00000070493	Chchd2	ortholog_one2one	60.7143	66.6667	25	100	1	-1.28944	4.23293e-05	-0.959273	1.36501e-05	-1.16007	9.54334e-07
ENSDARG00000060537	atad2b	ENSMUSG00000052812	Atad2b	ortholog_one2one	58.6157	55.6849	75	32.76	1	-1.28441	0.00144472	0.343938	0.00897494	1.17851	1.86414e-10
ENSDARG00000041022	pdcd4b	ENSMUSG00000024975	Pdcd4	ortholog_one2one	70.4255	70.5757	100	46.13	1	-1.28402	4.44197e-05	-0.211119	0.238529	-0.826683	7.49151e-05
ENSDARG00000073997	srpk1a	ENSMUSG00000004865	Srpk1	ortholog_one2many	64.0379	62.6543	50	18.56	0	-1.28394	2.11811e-05	-1.18031	4.65509e-13	-0.439019	4.60444e-06
ENSDARG00000017173	si:dkey-29p10.4	ENSMUSG00000039853	Trim14	ortholog_one2many	16.2706	20.2273	0	0	0	-1.27725	0.000804899	4.05308	3.83196e-17	1.43556	6.37137e-07
ENSDARG00000060551	rps6ka5	ENSMUSG00000021180	Rps6ka5	ortholog_one2one	76.0599	70.6837	0	2.9	0	-1.27684	0.202696	0.971596	7.1671e-07	0.889393	4.1173e-06
ENSDARG00000019950	carf	ENSMUSG00000026017	Carf	ortholog_one2one	40.6959	39.0421	0	44.51	0	-1.27553	6.94961e-06	-2.65342	8.8151e-19	-0.704704	2.27511e-10
ENSDARG00000052697	fam172a	ENSMUSG00000064138	Fam172a	ortholog_one2one	71.5663	71.223	100	39.67	1	-1.2755	1.284e-05	0.634479	1.45514e-11	0.566542	1.34885e-10
ENSDARG00000011219	akt2	ENSMUSG00000004056	Akt2	ortholog_one2many	86.4301	86.0707	0	17.57	0	-1.2747	0.0002322	0.598212	2.38503e-09	0.791797	1.57053e-11
ENSDARG00000000018	nrf1	ENSMUSG00000058440	Nrf1	ortholog_one2one	82.9365	78.2772	50	54.65	0	-1.27444	2.37002e-06	-0.031428	0.665134	0.687386	9.60961e-11
ENSDARG00000090512	trim8a	ENSMUSG00000025034	Trim8	ortholog_one2many	65.7801	67.3321	50	34.05	0	-1.27417	1.82852e-05	1.03532	3.98213e-12	0.854052	1.73217e-10
ENSDARG00000077364	mapk9	ENSMUSG00000020366	Mapk9	ortholog_one2one	83.1354	82.7423	25	3.12	0	-1.27414	0.000154009	0.500195	1.15793e-09	0.354066	4.15384e-07
ENSDARG00000100947	mafk	ENSMUSG00000018143	Mafk	ortholog_one2one	82.8026	83.3333	100	59.27	1	-1.27372	0.0818313	-0.267728	0.0294786	-0.199776	0.10432
ENSDARG00000061759	kdm6a	ENSMUSG00000037369	Kdm6a	ortholog_many2many	72.865	74.2978	75	86.79	1	-1.27081	2.71154e-05	0.271304	0.0138833	0.425613	0.000315263
ENSDARG00000002060	brf2	ENSMUSG00000031487	Brf2	ortholog_one2many	32.0158	19.2857	25	27.76	0	-1.27024	0.000191995	-0.973408	4.43525e-08	-0.315335	0.0116136
ENSDARG00000069469	khdrbs2	ENSMUSG00000026058	Khdrbs2	ortholog_one2one	74.8555	74.212	25	93.42	1	-1.26912	0.000919175	0	2.19596e-13	0	1.43311e-13
ENSDARG00000062897	tnksb	ENSMUSG00000031529	Tnks	ortholog_one2many	85.5469	82.9545	0	44.66	0	-1.26865	8.41415e-07	0.0222263	0.852619	0.333277	0.00116408
ENSDARG00000042282	itga6a	ENSMUSG00000027111	Itga6	ortholog_one2many	57.9724	57.6535	75	53.09	1	-1.26748	0.000227827	0.814977	4.79938e-07	1.31033	5.24865e-11
ENSDARG00000038754	plk3	ENSMUSG00000028680	Plk3	ortholog_one2one	54.2424	55.2469	0	54.46	0	-1.26551	0.000650952	0.983725	0.0173716	1.46959	0.000444305
ENSDARG00000090764	bcas3	ENSMUSG00000059439	Bcas3	ortholog_one2one	83.8462	82.2198	75	96.74	1	-1.26359	6.42158e-06	-0.73022	5.37699e-13	-0.693252	1.77901e-12
ENSDARG00000011360	nfatc2ip	ENSMUSG00000030722	Nfatc2ip	ortholog_one2one	31.1615	26.699	25	0.76	0	-1.26349	1.80228e-05	0.485423	0.208797	0.539875	0.17323
ENSDARG00000061508	tgfbrap1	ENSMUSG00000070939	Tgfbrap1	ortholog_one2one	62.6883	62.907	75	100	1	-1.26264	0.000733846	0.268542	0.0490186	-0.305331	0.0534748
ENSDARG00000031819	eif4ebp2	ENSMUSG00000020091	Eif4ebp2	ortholog_one2one	71.6814	67.5	0	88.48	1	-1.25755	5.62373e-06	0.987359	5.30811e-06	-0.108989	0.594508
ENSDARG00000000568	ell	ENSMUSG00000070002	Ell	ortholog_one2one	56.2401	59.1362	25	62.31	0	-1.25746	0.00123779	0.1106	0.139144	-0.456999	1.39857e-06
ENSDARG00000029157	med23	ENSMUSG00000019984	Med23	ortholog_one2one	88.3201	89.0262	50	47.41	0	-1.2487	0.00544455	-0.0611445	0.578663	-0.248336	0.0163839
ENSDARG00000062146	larp4b	ENSMUSG00000033499	Larp4b	ortholog_one2one	45.7815	44.6694	50	44.92	0	-1.24139	0.000889684	1.88622	1.67614e-21	0.308402	1.98971e-06
ENSDARG00000007485	epc2	ENSMUSG00000069495	Epc2	ortholog_one2one	62.9827	58.5396	0	59.44	0	-1.24138	0.0052721	-1.20932	1.43165e-08	0.938995	4.68191e-09
ENSDARG00000101602	preb	ENSMUSG00000045302	Preb	ortholog_one2one	54.3529	55.3957	0	44.8	0	-1.23882	4.59215e-05	-0.401126	5.67797e-05	-1.1576	3.62674e-12
ENSDARG00000078801	msantd1	ENSMUSG00000051246	Msantd1	ortholog_one2one	47.8102	47.1223	25	60.93	0	-1.23657	0.00102201	0	0.000227231	0	0.000235467
ENSDARG00000068192	taf4a	ENSMUSG00000039117	Taf4	ortholog_one2one	52.3752	41.2668	25	2.96	0	-1.23554	0.00019056	-0.11757	0.473606	-0.622875	0.000513808
ENSDARG00000060306	tfcp2	ENSMUSG00000009733	Tfcp2	ortholog_one2one	85.9375	87.6494	75	100	1	-1.23086	3.90111e-06	-0.505679	1.51446e-07	-0.876757	1.32117e-11
ENSDARG00000038113	rprd1b	ENSMUSG00000027651	Rprd1b	ortholog_one2one	77.3134	79.4479	25	8.06	0	-1.23028	3.84965e-05	-0.283064	0.000654634	-0.63472	1.42735e-08
ENSDARG00000074245	spen	ENSMUSG00000040761	Spen	ortholog_one2many	42.5295	36.6456	25	45.8	0	-1.22937	0.000412351	0.0719231	0.602372	1.15977	3.71786e-11
ENSDARG00000027734	srsf5b	ENSMUSG00000021134	Srsf5	ortholog_one2one	72.6316	76.6667	50	1.18	0	-1.22927	0.000595486	0.00728205	0.996365	-0.569067	5.7256e-10
ENSDARG00000079751	megf8	ENSMUSG00000045039	Megf8	ortholog_one2one	54.2509	55.8265	0	48.74	0	-1.228	5.03595e-06	-0.69866	1.15401e-06	0.436434	0.000137972
ENSDARG00000015990	hcfc1a	ENSMUSG00000031386	Hcfc1	ortholog_one2many	71.6981	63.1785	0	55.06	0	-1.22658	7.20683e-05	-0.0528646	0.600244	0.295085	0.00225667
ENSDARG00000093420	creb1b	ENSMUSG00000025958	Creb1	ortholog_one2many	89.5062	85.044	75	22.73	1	-1.22561	0.00139034	-0.370814	0.000250743	0.0427245	0.685208
ENSDARG00000004452	tardbpl	ENSMUSG00000041459	Tardbp	ortholog_one2many	74.9398	75.1208	50	97.81	1	-1.22325	1.65034e-05	0.534561	2.24893e-07	0.0266994	0.819929
ENSDARG00000078066	elk1	ENSMUSG00000009406	Elk1	ortholog_one2one	38.0038	46.1538	25	16.91	0	-1.22239	0.000805854	1.2057	1.11568e-07	-0.82025	0.00313665
ENSDARG00000100020	pim1	ENSMUSG00000024014	Pim1	ortholog_one2one	69.375	70.9265	25	91.06	1	-1.22009	0.000636677	-2.00504	0.0589616	0.360418	0.605253
ENSDARG00000009681	med27	ENSMUSG00000026799	Med27	ortholog_one2one	87.7813	87.7813	50	63.64	0	-1.21494	0.000184397	-0.383773	0.000626975	-0.493613	3.9584e-05
ENSDARG00000020279	efcab7	ENSMUSG00000073791	Efcab7	ortholog_one2one	42.9043	45.614	100	57.63	0	-1.21183	0.000514461	-0.996092	9.30135e-09	-0.667958	3.35819e-06
ENSDARG00000007135	cnot3a	ENSMUSG00000035632	Cnot3	ortholog_one2many	55.0499	66.0453	0	47.86	0	-1.20816	5.62439e-05	0.481153	9.29917e-05	1.05903	4.70202e-10
ENSDARG00000013279	znf76	ENSMUSG00000024220	Zfp523	ortholog_one2one	64.3411	58.4507	0	75.4	1	-1.20723	4.51199e-06	-0.471327	6.92922e-07	-0.278255	0.000579218
ENSDARG00000060438	tbl1x	ENSMUSG00000025246	Tbl1x	ortholog_one2one	86.4706	83.6812	0	1.02	0	-1.20628	0.0382913	0.329453	2.78857e-07	-0.232328	4.97444e-05
ENSDARG00000039117	tefa	ENSMUSG00000022389	Tef	ortholog_one2many	53.3981	54.8173	75	15.39	1	-1.20496	0.000115482	0.212109	0.0231246	0.491978	8.02968e-06
ENSDARG00000056885	per1a	ENSMUSG00000020893	Per1	ortholog_one2many	42.3216	45.4686	25	2.43	0	-1.20482	0.00639352	-0.554112	0.0173702	0.318313	0.128426
ENSDARG00000041402	zc3h14	ENSMUSG00000021012	Zc3h14	ortholog_one2one	49.7758	45.3061	0	46.55	0	-1.19978	0.000864824	-0.401921	5.71114e-05	-0.600581	2.3015e-07
ENSDARG00000020926	creb3l3l	ENSMUSG00000028466	Creb3	ortholog_one2one	25.2485	33.5092	0	5.12	0	-1.19628	2.34065e-05	0.333246	7.27262e-05	0.401079	6.67116e-06
ENSDARG00000013078	ywhaba	ENSMUSG00000018326	Ywhab	ortholog_one2many	89.6694	88.2114	50	100	1	-1.19343	6.06757e-07	-0.0697028	0.275351	-0.53793	6.44852e-09
ENSDARG00000005606	paxip1	ENSMUSG00000002221	Paxip1	ortholog_one2one	60.0713	63.8258	50	91.56	1	-1.18988	0.00038355	0.321327	0.0037106	0.682621	4.43977e-07
ENSDARG00000062002	adnpa	ENSMUSG00000051149	Adnp	ortholog_one2many	47.4716	41.5162	0	5.28	0	-1.18902	1.84633e-07	-0.534885	0.763346	1.25264	0.197952
ENSDARG00000086838	itga2.3	ENSMUSG00000015533	Itga2	ortholog_one2many	46.1135	44.8217	75	18.29	0	-1.18864	5.57231e-06	0	1.94193e-07	0	1
ENSDARG00000028335	hmga1a	ENSMUSG00000046711	Hmga1	ortholog_many2many	50	42.9907	50	10.7	0	-1.18318	0.000103681	0.0539269	1	-0.900532	0.0804084
ENSDARG00000103893	srsf2b	ENSMUSG00000034120	Srsf2	ortholog_one2many	76.4444	77.8281	75	100	1	-1.18055	0.000140283	-0.103973	0.182078	-0.887531	3.75277e-11
ENSDARG00000087616	maptb	ENSMUSG00000018411	Mapt	ortholog_one2many	15.1671	27.4419	50	13.58	0	-1.17909	0.0330341	3.19009	2.4368e-14	3.10848	8.32237e-14
ENSDARG00000102899	cremb	ENSMUSG00000063889	Crem	ortholog_one2one	63.8889	19.3277	0	1.12	0	-1.17396	0.00129248	-1.68442	1.14955e-18	-1.6222	3.97423e-18
ENSDARG00000062244	setd2	ENSMUSG00000044791	Setd2	ortholog_one2one	37.8151	40.7962	50	69.83	0	-1.17267	0.00111147	-0.00530239	1	0.538495	4.82022e-07
ENSDARG00000031216	ssu72	ENSMUSG00000029038	Ssu72	ortholog_one2one	89.1753	89.1753	50	70.39	0	-1.17154	0.000302383	-0.425081	1.12547e-07	-0.519411	4.27615e-09
ENSDARG00000041503	med4	ENSMUSG00000022109	Med4	ortholog_one2one	80.7087	75.9259	25	15.44	0	-1.17152	9.01665e-05	-0.105969	0.0792345	-0.273096	6.97044e-05
ENSDARG00000075952	mbd2	ENSMUSG00000024513	Mbd2	ortholog_one2one	64.3979	29.7101	0	20.05	0	-1.16704	1.67886e-05	-0.934871	5.27765e-13	-1.14877	1.32922e-14
ENSDARG00000035256	eef2l2	ENSMUSG00000034994	Eef2	ortholog_one2one	92.5668	92.8904	0	25.32	0	-1.16673	0.045999	0.607301	2.27954e-10	0.285539	3.44071e-05
ENSDARG00000068176	uqcc1	ENSMUSG00000005882	Uqcc1	ortholog_one2one	57.3427	55.5932	75	1.39	1	-1.16107	0.000416524	-0.483185	1.34856e-08	-0.821962	1.20263e-12
ENSDARG00000036695	calcoco1a	ENSMUSG00000023055	Calcoco1	ortholog_one2many	33.0261	31.1143	50	24.87	0	-1.16072	4.06563e-06	-0.406591	0.000110312	-0.61	5.30731e-07
ENSDARG00000068415	ptgesl	ENSMUSG00000026820	Ptges2	ortholog_one2one	54.7619	53.9062	0	68.34	0	-1.15947	0.0019958	-0.832721	2.17156e-10	-0.531148	4.10364e-07
ENSDARG00000004861	esrrga	ENSMUSG00000026610	Esrrg	ortholog_one2one	83.4331	91.2664	75	37.64	1	-1.15337	5.35783e-05	0	4.13863e-11	0	0.57087
ENSDARG00000035882	hrsp12	ENSMUSG00000022323	Rida	ortholog_one2one	66.6667	66.6667	75	89.16	1	-1.15265	0.000462352	0.312008	0.000153623	0.572801	3.11723e-08
ENSDARG00000029474	camk1b	ENSMUSG00000030272	Camk1	ortholog_one2many	74.6667	74.8663	0	53.75	0	-1.15074	0.00480638	0.245506	0.000139893	0.50939	3.17098e-09
ENSDARG00000017230	fbxw11b	ENSMUSG00000025217	Btrc	ortholog_one2many	80.6452	70.2479	0	69.34	0	-1.12711	0.000370073	0.892303	3.02177e-14	0.414686	5.39873e-08
ENSDARG00000019810	nfe2l3	ENSMUSG00000029832	Nfe2l3	ortholog_one2one	27.2583	26.0606	50	0	0	-1.12584	0.00797325	0.342426	3.81298e-06	0.301728	2.33492e-05
ENSDARG00000038768	mrpl12	ENSMUSG00000039640	Mrpl12	ortholog_one2one	57.2864	56.7164	50	16.12	0	-1.12366	0.000538596	0.626703	1.30526e-07	0.210782	0.0201319
ENSDARG00000022968	fxr1	ENSMUSG00000027680	Fxr1	ortholog_one2one	74.2636	70.7533	75	53.04	1	-1.12351	7.1629e-05	-0.255164	0.0102616	-0.73041	7.06564e-08
ENSDARG00000002787	tle3a	ENSMUSG00000032280	Tle3	ortholog_one2many	90.4639	89.7698	50	72.23	0	-1.12315	0.000174858	1.75775	7.23378e-09	1.02253	0.000221588
ENSDARG00000102589	rsf1a	ENSMUSG00000035623	Rsf1	ortholog_one2many	33.0784	24.0111	100	0	0	-1.12301	5.72646e-05	-0.15706	0.0298062	0.279934	0.000245491
ENSDARG00000105177	ilf3b	ENSMUSG00000032178	Ilf3	ortholog_one2one	67.1068	62.2494	0	66.92	0	-1.12229	0.00905206	0.0611012	0.648796	-0.0683197	0.616726
ENSDARG00000019033	tmem59	ENSMUSG00000028618	Tmem59	ortholog_one2one	56.6667	57.8947	25	47.4	0	-1.1183	1.40554e-07	-0.139612	0.00515806	-0.0119589	0.880341
ENSDARG00000023659	gabpb1	ENSMUSG00000027361	Gabpb1	ortholog_one2one	68.8705	65.2742	75	75.18	1	-1.11772	9.48816e-06	0.0720183	0.419767	0.894374	4.38779e-11
ENSDARG00000071551	xrcc6	ENSMUSG00000022471	Xrcc6	ortholog_one2one	57.8689	58.0592	0	93.19	1	-1.1166	6.29792e-05	-0.0796329	0.293248	-0.302617	0.000285225
ENSDARG00000068406	six5	ENSMUSG00000040841	Six5	ortholog_one2one	32.2055	35.7441	0	43.41	0	-1.11304	5.81277e-08	0.704833	0.0011415	-0.927655	0.000447222
ENSDARG00000030598	nampta	ENSMUSG00000020572	Nampt	ortholog_one2many	39.3693	78.8187	50	3.55	0	-1.11204	0.00244859	0.242225	0.177917	0.380131	0.0349184
ENSDARG00000052388	pcgf5b	ENSMUSG00000024805	Pcgf5	ortholog_one2many	78.6325	77.9661	100	57.88	1	-1.10707	0.00194223	0.190552	0.00699586	0.0945324	0.179336
ENSDARG00000018691	phf2	ENSMUSG00000038025	Phf2	ortholog_one2one	67.0698	65.7847	75	100	1	-1.10701	0.000518661	0.186319	0.241762	0.563809	0.000332406
ENSDARG00000057577	mbtps2	ENSMUSG00000046873	Mbtps2	ortholog_one2one	62.9555	60.3883	50	23.43	0	-1.10644	0.000121192	-0.509534	0.000418749	-0.593306	9.32732e-05
ENSDARG00000103472	nedd8l	ENSMUSG00000010376	Nedd8	ortholog_one2many	95	93.8272	0	44.6	0	-1.10621	3.83239e-06	0.112594	0.141065	-0.164597	0.0310424
ENSDARG00000035505	nelfb	ENSMUSG00000013465	Nelfb	ortholog_one2one	73.6041	68.9382	0	87.22	1	-1.105	0.00917135	0.0358012	0.707829	0.162827	0.0447831
ENSDARG00000010300	traf3ip1	ENSMUSG00000034292	Traf3ip1	ortholog_one2one	53.4181	53.76	50	62.12	0	-1.10368	0.0050554	-0.393337	0.00658838	-0.172166	0.221211
ENSDARG00000102307	taf2	ENSMUSG00000037343	Taf2	ortholog_one2one	81.78	81.3022	50	83.53	1	-1.10125	9.27904e-05	0.35252	0.00105373	1.06513	6.06027e-11
ENSDARG00000060994	fbxw7	ENSMUSG00000028086	Fbxw7	ortholog_one2one	67.2662	79.0141	50	33.63	0	-1.09736	8.37228e-05	0.277539	0.00282273	-0.111296	0.235609
ENSDARG00000079687	rnf10	ENSMUSG00000041740	Rnf10	ortholog_one2one	59.2545	57.2671	0	9.78	0	-1.09732	0.00164651	0.103811	0.252753	-0.283836	0.00314832
ENSDARG00000058630	zgc:162472	ENSMUSG00000049658	Bdp1	ortholog_one2many	33.9552	7.37738	0	0.76	0	-1.0918	0.000212381	-1.59731	3.33242e-13	-0.374302	0.000282981
ENSDARG00000042724	supt5h	ENSMUSG00000003435	Supt5	ortholog_one2one	87.3616	87.5231	50	72.88	0	-1.08919	0.00583412	-0.220154	0.0490985	-0.345446	0.00322031
ENSDARG00000041072	mier1a	ENSMUSG00000028522	Mier1	ortholog_one2many	54.6559	48.5611	0	5.68	0	-1.08623	0.00405372	-0.227968	0.0406054	0.351224	0.00105482
ENSDARG00000040884	mxi1	ENSMUSG00000025025	Mxi1	ortholog_one2one	58.2418	53.8983	25	68.65	0	-1.08385	8.17771e-05	-0.273853	2.41213e-09	0.369335	1.08582e-11
ENSDARG00000013329	ttc5	ENSMUSG00000006288	Ttc5	ortholog_one2one	56.1247	57.2727	0	39.9	0	-1.08219	0.00146069	-0.604215	1.67922e-10	-0.205497	0.000962411
ENSDARG00000017272	eapp	ENSMUSG00000054302	Eapp	ortholog_one2one	57.9805	63.3452	100	100	1	-1.07697	0.000779426	0.0963411	0.281965	0.548384	3.07635e-07
ENSDARG00000077906	rnf165a	ENSMUSG00000025427	Rnf165	ortholog_one2many	67.8899	63.9769	50	62.04	0	-1.07582	0.000927891	0	1	0	0.27615
ENSDARG00000034826	park7	ENSMUSG00000028964	Park7	ortholog_one2one	80.9524	80.9524	0	99.92	1	-1.07463	9.31228e-07	0.712381	4.87208e-16	0.421586	1.6323e-11
ENSDARG00000070084	phf10	ENSMUSG00000023883	Phf10	ortholog_one2one	72.6531	71.6298	0	44.93	0	-1.07308	0.000148911	-1.29178	2.01634e-13	-0.439864	1.17139e-05
ENSDARG00000017423	patl1	ENSMUSG00000046139	Patl1	ortholog_one2one	46.4052	46.1039	25	5.84	0	-1.07234	0.0152052	-0.690519	1.26467e-05	-1.15548	1.23117e-08
ENSDARG00000032039	mxd1	ENSMUSG00000001156	Mxd1	ortholog_one2one	67.4208	65.6388	25	58.79	0	-1.07039	0.279706	-0.37502	0.000928738	0.381616	0.000437174
ENSDARG00000054087	irs1	ENSMUSG00000055980	Irs1	ortholog_one2one	58.2348	51.9903	75	90.26	1	-1.06841	0.0325755	0.394282	0.677319	0.749948	0.351151
ENSDARG00000039486	bag3	ENSMUSG00000030847	Bag3	ortholog_one2one	36.0417	29.9827	75	30.11	0	-1.06516	0.043525	1.54835	2.0088e-10	1.95238	2.65317e-12
ENSDARG00000078497	timeless	ENSMUSG00000039994	Timeless	ortholog_one2one	57.7465	61.6541	0	72.99	0	-1.06275	0.000385432	0	8.76151e-12	0	0.00105378
ENSDARG00000074807	tbrg4	ENSMUSG00000000384	Tbrg4	ortholog_one2one	40.729	40.7937	25	4.6	0	-1.06265	5.4753e-06	-0.709547	0.0539345	-0.234284	0.506993
ENSDARG00000062834	ecsit	ENSMUSG00000066839	Ecsit	ortholog_one2one	46.6814	48.5057	0	6.16	0	-1.06151	0.0251178	-1.04445	2.09259e-13	-0.850752	1.16312e-11
ENSDARG00000026839	med21	ENSMUSG00000030291	Med21	ortholog_one2one	85.5172	86.1111	50	100	1	-1.06048	0.000606935	-0.143839	0.741034	-0.383451	0.311872
ENSDARG00000037172	ddrgk1	ENSMUSG00000068290	Ddrgk1	ortholog_one2one	44.3548	17.4603	0	15.72	0	-1.05841	0.000475896	-1.2263	1.29669e-12	-0.0990659	0.288705
ENSDARG00000059212	ciao1	ENSMUSG00000003662	Ciao1	ortholog_one2one	76.6667	74.6313	25	100	1	-1.05836	0.000227561	-0.12976	0.0276078	-0.41571	1.39804e-07
ENSDARG00000092979	pias2	ENSMUSG00000025423	Pias2	ortholog_one2one	69.1814	69.4042	0	74.04	1	-1.05305	0.00627368	-0.528458	4.62427e-08	-0.0798549	0.255414
ENSDARG00000045513	taf3	ENSMUSG00000025782	Taf3	ortholog_one2one	50	48.176	100	100	1	-1.05213	0.00326389	0.0267464	0.66721	0.581859	1.55398e-11
ENSDARG00000097537	wwp1	ENSMUSG00000041058	Wwp1	ortholog_one2one	67.0125	70.3704	0	75.38	1	-1.0488	0.000943623	0.576531	1.40696e-06	0.981077	1.2262e-10
ENSDARG00000103799	kars	ENSMUSG00000031948	Kars	ortholog_one2one	80.2326	77.4038	0	43.52	0	-1.04427	6.54134e-05	-0.288274	0.000725298	-0.0411898	0.658188
ENSDARG00000055349	pknox2	ENSMUSG00000035934	Pknox2	ortholog_one2one	78.481	78.481	25	100	1	-1.04076	5.03844e-05	-1.83699	3.03779e-22	-1.23816	7.71528e-19
ENSDARG00000077361	bptf	ENSMUSG00000040481	Bptf	ortholog_one2one	53.6408	52.9613	50	89.2	1	-1.03923	7.88412e-07	-0.600546	8.65293e-08	0.884003	4.57398e-12
ENSDARG00000015829	mov10a	ENSMUSG00000002227	Mov10	ortholog_one2many	42.5469	40.0186	75	20.14	0	-1.03674	0.00114703	2.40634	4.77288e-17	1.36754	2.56307e-11
ENSDARG00000012196	fer	ENSMUSG00000000127	Fer	ortholog_one2one	71.8193	73.39	50	48.34	0	-1.03484	0.0739771	-0.24704	0.0082772	-0.366113	0.000283348
ENSDARG00000099021	setdb1b	ENSMUSG00000015697	Setdb1	ortholog_one2one	59.4728	55.1988	0	26.01	0	-1.03371	0.000288358	0.996638	2.42049e-13	0.0611348	0.454193
ENSDARG00000038302	ccar2	ENSMUSG00000033712	Ccar2	ortholog_one2one	29.798	25.5965	0	0	0	-1.02703	0.000472379	-0.0566402	0.659686	-0.73496	8.5851e-07
ENSDARG00000070475	khdrbs1b	ENSMUSG00000028790	Khdrbs1	ortholog_one2many	59.4595	49.6614	50	7.63	0	-1.02678	3.60187e-05	0.257829	0.000125828	-0.429556	1.82544e-07
ENSDARG00000016447	ythdf1	ENSMUSG00000038848	Ythdf1	ortholog_one2one	70.684	77.6386	25	57.87	0	-1.02613	0.00252705	-0.933057	2.50644e-14	-1.33386	3.79685e-17
ENSDARG00000087950	IWS1	ENSMUSG00000024384	Iws1	ortholog_one2one	51.4139	52.2193	0	5.45	0	-1.02371	0.000146525	-0.363818	9.4357e-07	0.163239	0.00557247
ENSDARG00000056683	cdk5	ENSMUSG00000028969	Cdk5	ortholog_one2one	96.5753	96.5753	0	97.69	1	-1.02286	0.0068644	-0.45268	1.11619e-05	-0.807114	1.41141e-09
ENSDARG00000086789	bahd1	ENSMUSG00000040007	Bahd1	ortholog_one2many	30.7967	33.5492	75	10.93	0	-1.02282	0.00984718	-1.00803	1.75012e-07	-0.940704	4.39775e-07
ENSDARG00000103648	znf536	ENSMUSG00000043456	Zfp536	ortholog_one2one	54.4056	59.7542	100	46.32	1	-1.02149	3.12847e-06	0	2.73503e-10	0	0.288652
ENSDARG00000086775	top1	ENSMUSG00000070544	Top1	ortholog_one2many	75.7656	74.1851	50	0	0	-1.01939	2.06339e-05	-0.349137	0.000628032	-0.192547	0.0422736
ENSDARG00000099843	nedd4a	ENSMUSG00000032216	Nedd4	ortholog_one2one	61.8806	54.9042	0	33.12	0	-1.01799	0.0201861	0.480988	2.7444e-12	0.381141	2.41586e-10
ENSDARG00000079000	tp53bp1	ENSMUSG00000043909	Trp53bp1	ortholog_one2one	34.9912	30.3707	75	36.76	0	-1.016	0.00122541	-0.853242	9.24657e-08	-0.694857	1.75178e-06
ENSDARG00000077530	ahctf1	ENSMUSG00000026491	Ahctf1	ortholog_one2one	36.486	41.1057	50	100	0	-1.01523	0.000212672	-0.0938375	0.422985	0.488474	2.24068e-05
ENSDARG00000018688	elk3	ENSMUSG00000008398	Elk3	ortholog_one2one	63.9706	63.8142	25	47.78	0	-1.01412	0.0994419	-1.62841	1.10689e-09	-1.71905	6.72622e-10
ENSDARG00000056924	sap130a	ENSMUSG00000024260	Sap130	ortholog_one2many	60.7862	60.0379	0	17.61	0	-1.01318	0.00252146	0.409781	0.028587	-0.110046	0.620471
ENSDARG00000014986	acvr1l	ENSMUSG00000026836	Acvr1	ortholog_one2one	65.0198	64.6365	0	36.06	0	-1.01154	7.39557e-07	-0.123303	0.405092	-0.316145	0.0210514
ENSDARG00000099733	si:ch73-167c12.2	ENSMUSG00000041777	Cir1	ortholog_one2one	100	5.33333	75	100	1	-1.00649	0.0538911	-0.189136	0.0983223	0.0362119	0.833417
ENSDARG00000021163	thrb	ENSMUSG00000021779	Thrb	ortholog_one2one	84.3038	70.1053	75	36.55	1	-1.00554	0.000892124	1.25368	3.29293e-09	0.607132	0.000221983
ENSDARG00000068822	purba	ENSMUSG00000094483	Purb	ortholog_one2many	81.4815	74.6914	0	0	0	-1.00488	0.000380606	-1.01527	9.32034e-15	-0.36693	5.57422e-07
ENSDARG00000102643	chmp1a	ENSMUSG00000000743	Chmp1a	ortholog_one2one	84.5	86.2245	0	47.99	0	-1.00412	0.00182039	0.550788	1.76449e-13	0.279521	4.85364e-08
ENSDARG00000037421	egr1	ENSMUSG00000038418	Egr1	ortholog_one2one	64.1879	61.5385	50	48.79	0	-1.00304	0.489626	1.20093	5.02196e-10	0.214366	0.110855
ENSDARG00000006621	pspc1	ENSMUSG00000021938	Pspc1	ortholog_one2one	64.8438	63.4799	0	64.63	0	-1.00267	0.00014312	0.0657324	0.648391	0.0644132	0.688195
ENSDARG00000000069	dap	ENSMUSG00000039168	Dap	ortholog_one2one	59.0476	60.7843	75	25.72	1	-1.00107	5.43123e-05	0.363448	8.68895e-07	-0.0474273	0.436826
ENSDARG00000043388	atraid	ENSMUSG00000013622	Atraid	ortholog_one2one	37.3913	38.565	0	15.86	0	-1	0.0030433	0.56941	9.62865e-11	0.708222	1.88407e-12
ENSDARG00000043249	txndc15	ENSMUSG00000018899	Irf1	ortholog_one2one	47.0383	41.0334	25	20.15	0	-0.998831	0.00145331	3.50087	5.03888e-13	1.91714	4.9198e-06
ENSDARG00000019293	tfdp1a	ENSMUSG00000038482	Tfdp1	ortholog_one2one	79.9511	79.7561	25	92.57	1	-0.998005	0.000388598	1.04225	4.05278e-12	-0.00266982	1
ENSDARG00000003429	hnrpdl	ENSMUSG00000029328	Hnrnpdl	ortholog_one2many	79.0541	55.7143	75	58.23	1	-0.997737	1.03251e-06	-0.261704	0.000447007	-0.359696	1.02913e-05
ENSDARG00000076542	pogzb	ENSMUSG00000038902	Pogz	ortholog_one2many	29.5223	26.7566	25	13.21	0	-0.996117	0.000559664	-0.153848	0.0841223	-0.100089	0.286877
ENSDARG00000019797	qrich1	ENSMUSG00000006673	Qrich1	ortholog_one2one	67.9219	62.677	0	50.51	0	-0.996015	0.00578827	-0.275966	4.24479e-05	-1.50841	4.85327e-17
ENSDARG00000104734	kat2a	ENSMUSG00000020918	Kat2a	ortholog_one2one	83.8994	80.3614	100	86.81	1	-0.993755	0.00698218	-0.113793	0.366983	-0.536624	0.000146692
ENSDARG00000104018	mtpn	ENSMUSG00000029840	Mtpn	ortholog_one2one	78.8136	78.8136	0	100	1	-0.99261	0.000208286	-0.639644	3.42381e-11	-0.354054	8.6511e-07
ENSDARG00000100143	lrp6	ENSMUSG00000030201	Lrp6	ortholog_one2one	66.2338	66.398	25	50.25	0	-0.987887	0.00107829	0.530417	0.000494734	1.26124	1.288e-09
ENSDARG00000062727	cep290	ENSMUSG00000019971	Cep290	ortholog_one2one	57.4416	56.5147	50	35.32	0	-0.982676	0.000714492	-1.41752	1.57363e-06	-0.794465	0.000877162
ENSDARG00000008706	paip2b	ENSMUSG00000045896	Paip2b	ortholog_one2one	63.3588	61.0294	0	45.84	0	-0.980327	2.1779e-05	0.264141	0.038856	0.136611	0.298041
ENSDARG00000099657	akt1	ENSMUSG00000001729	Akt1	ortholog_one2one	82.9694	79.1667	0	0	0	-0.978966	0.00072624	0.526468	3.04233e-08	0.0578648	0.434569
ENSDARG00000055838	mettl16	ENSMUSG00000010554	Mettl16	ortholog_one2one	75.1592	64.0145	75	60.5	1	-0.976573	0.0146926	0.184295	0.009566	0.292192	0.000166762
ENSDARG00000007370	dysf	ENSMUSG00000033788	Dysf	ortholog_one2one	67.4297	67.3333	50	20.14	0	-0.975914	0.000642134	2.14132	9.30238e-16	1.5126	6.06412e-12
ENSDARG00000022415	srsf10a	ENSMUSG00000028676	Srsf10	ortholog_one2many	60.0806	56.8702	0	15.68	0	-0.975492	0.000356598	-0.29896	7.85352e-06	-0.646553	2.88984e-11
ENSDARG00000011570	pou6f1	ENSMUSG00000009739	Pou6f1	ortholog_one2one	48.3607	51.2153	100	4.43	0	-0.974749	0.000939287	0.428336	0.0268479	0.689424	0.000414296
ENSDARG00000006010	bmi1a	ENSMUSG00000026739	Bmi1	ortholog_one2many	77.3006	77.7778	75	95.91	1	-0.970299	0.000672462	-1.55644	4.1671e-18	-0.3335	4.41239e-06
ENSDARG00000095890	znf236	ENSMUSG00000041258	Zfp236	ortholog_one2one	52.8058	52.3068	25	33.69	0	-0.970099	0.00851436	-0.358881	0.000243654	0.988321	1.57307e-12
ENSDARG00000035732	arntl1b	ENSMUSG00000055116	Arntl	ortholog_one2many	85.3035	85.3035	75	0	1	-0.962872	0.000219999	-1.31946	8.57474e-09	-0.559772	0.000729484
ENSDARG00000086896	fubp3	ENSMUSG00000026843	Fubp3	ortholog_one2one	65.1206	61.0435	0	63.81	0	-0.958724	0.00270211	0.0466875	0.57712	0.300014	0.000323629
ENSDARG00000062139	eif2ak3	ENSMUSG00000031668	Eif2ak3	ortholog_one2one	58.3258	57.5404	25	69.13	0	-0.956931	0.0196832	0.595721	0.000157059	0.187254	0.23332
ENSDARG00000030560	helz	ENSMUSG00000020721	Helz	ortholog_one2one	63.5484	60.1527	50	72.28	0	-0.954415	0.00279106	0.449159	0.000161989	0.245908	0.0286868
ENSDARG00000068601	atmin	ENSMUSG00000047388	Atmin	ortholog_one2one	51.1229	47.3105	0	84.36	1	-0.950654	0.0113457	0.572891	2.73171e-07	-0.501479	4.51797e-06
ENSDARG00000004782	fgfr3	ENSMUSG00000054252	Fgfr3	ortholog_one2one	71.5507	73.1586	50	1.13	0	-0.947723	0.000733589	4.25806	1.09083e-26	4.96015	1.38534e-27
ENSDARG00000008748	ube2na	ENSMUSG00000074781	Ube2n	ortholog_one2one	95.4545	96.7105	25	100	1	-0.94373	2.79625e-05	-0.232207	1.28693e-06	-0.0852449	0.0267392
ENSDARG00000057939	ythdf3	ENSMUSG00000047213	Ythdf3	ortholog_one2one	80.5	81.0403	50	97.3	1	-0.943718	8.05354e-05	-0.616149	6.76426e-08	-0.256442	0.00322031
ENSDARG00000014218	mecp2	ENSMUSG00000031393	Mecp2	ortholog_one2one	42.6386	44.511	50	4.69	0	-0.941226	0.0531147	0.0909806	0.158695	0.0178898	0.877693
ENSDARG00000003607	nr2f6a	ENSMUSG00000002393	Nr2f6	ortholog_one2many	72.3881	74.6154	25	100	1	-0.940459	4.14594e-05	0.459679	3.62916e-06	0.47543	2.47727e-06
ENSDARG00000090202	rbm11	ENSMUSG00000032940	Rbm11	ortholog_one2one	28.4946	22.2689	25	0	0	-0.939246	0.20653	0	1	0	1
ENSDARG00000089302	hnrnpa0a	ENSMUSG00000007836	Hnrnpa0	ortholog_one2many	59.0164	59.0164	25	99.3	1	-0.936309	0.000113178	0.210535	0.108413	1.02801	9.65728e-09
ENSDARG00000103388	znf609a	ENSMUSG00000040524	Zfp609	ortholog_one2many	59.5425	58.9526	0	100	1	-0.935548	1.72976e-06	0.654156	0.0159251	0.578357	0.0360997
ENSDARG00000092644	ago1	ENSMUSG00000041530	Ago1	ortholog_one2one	96.3869	96.4994	25	0	0	-0.934905	0.350144	0.375765	1.21559e-05	0.560505	1.82387e-08
ENSDARG00000104311	scmh1	ENSMUSG00000000085	Scmh1	ortholog_one2one	75.8333	12.8895	25	27.73	0	-0.932137	0.00634414	0.289507	0.000575011	-0.520949	6.33504e-07
ENSDARG00000005908	clk4b	ENSMUSG00000026034	Clk1	ortholog_many2many	56.8548	58.3851	25	0	0	-0.928994	0.000396267	-0.0653089	0.452302	-0.469582	3.74319e-06
ENSDARG00000055854	nr4a3	ENSMUSG00000028341	Nr4a3	ortholog_one2one	50.5831	55.3429	75	8.59	1	-0.928351	2.3964e-05	0	0.106029	0	0.107925
ENSDARG00000105293	srsf4	ENSMUSG00000028911	Srsf4	ortholog_one2one	65.847	49.0835	50	21.53	0	-0.926596	0.00139504	0.212094	0.0197165	-0.232066	0.0110267
ENSDARG00000035563	znf703	ENSMUSG00000085795	Zfp703	ortholog_one2one	52.292	51.8519	0	74.55	1	-0.925989	6.64054e-07	2.10631	3.32363e-05	0.353542	0.69988
ENSDARG00000051902	prmt7	ENSMUSG00000060098	Prmt7	ortholog_one2one	61.7862	60.9827	0	56.08	0	-0.924641	0.0497777	-0.24368	0.00224387	-0.564887	7.66081e-08
ENSDARG00000018882	jak2b	ENSMUSG00000024789	Jak2	ortholog_one2one	68.8277	68.4629	0	22.78	0	-0.921079	0.000161961	-0.0552639	0.42465	-0.447267	4.52674e-07
ENSDARG00000016858	smad7	ENSMUSG00000025880	Smad7	ortholog_one2one	81.4516	71.1268	75	71.22	1	-0.919886	0.0189973	1.95422	1.94946e-08	1.07191	0.000365594
ENSDARG00000061841	tiparp	ENSMUSG00000034640	Tiparp	ortholog_one2one	53.2508	52.3592	75	64.3	1	-0.919876	0.0113071	0.0707264	0.523733	0.845478	8.72214e-09
ENSDARG00000045401	mllt10	ENSMUSG00000026743	Mllt10	ortholog_one2one	44.8367	47.5655	50	46.18	0	-0.918464	0.000327658	-0.0492002	0.494915	0.616561	2.62065e-09
ENSDARG00000103725	znf341	ENSMUSG00000059842	Zfp341	ortholog_one2one	57.4121	54.0189	25	75.17	1	-0.918285	0.000886118	0.802524	0.0338159	1.11636	0.00282615
ENSDARG00000028322	pex14	ENSMUSG00000028975	Pex14	ortholog_one2one	55.5556	62.5	75	37.57	1	-0.917041	0.032775	0.591772	7.34801e-09	0.500994	1.27257e-07
ENSDARG00000028614	mospd1	ENSMUSG00000023074	Mospd1	ortholog_one2one	76.2557	78.0374	50	100	1	-0.911914	2.79702e-05	-0.564213	2.83279e-06	0.0322824	0.816699
ENSDARG00000099039	pcbp2	ENSMUSG00000051695	Pcbp1	ortholog_one2many	79.5597	71.0674	25	60.5	0	-0.910707	1.49356e-05	-0.0218239	0.906262	-0.940015	3.43936e-09
ENSDARG00000063701	rreb1a	ENSMUSG00000039087	Rreb1	ortholog_one2many	44.2274	42.5884	50	5.74	0	-0.910093	0.165574	0.126369	0.412192	-0.28103	0.0745898
ENSDARG00000104702	cat	ENSMUSG00000027187	Cat	ortholog_one2one	80.9886	80.8349	0	46.1	0	-0.902249	1.76584e-05	1.18418	1.09757e-14	0.637975	1.63489e-09
ENSDARG00000068708	ifrd1	ENSMUSG00000001627	Ifrd1	ortholog_one2one	62.7635	59.6882	50	8.45	0	-0.900745	7.84519e-06	0.5812	4.05803e-06	-0.267086	0.0165353
ENSDARG00000038812	e2f5	ENSMUSG00000027552	E2f5	ortholog_one2one	55.3719	60	50	19.78	0	-0.899071	0.000208791	0.147326	0.0024326	0.179336	0.000382414
ENSDARG00000038243	e4f1	ENSMUSG00000024137	E4f1	ortholog_one2one	45.758	42.0716	0	11.23	0	-0.89347	0.078388	0.217098	0.016614	0.0542559	0.609294
ENSDARG00000017037	ikbkg	ENSMUSG00000004221	Ikbkg	ortholog_one2one	29.402	41.1628	0	6.29	0	-0.892128	1.48617e-05	-0.0159771	0.921384	-0.0870852	0.299458
ENSDARG00000105243	ogt.1	ENSMUSG00000034160	Ogt	ortholog_one2many	91.3371	92.7342	25	38.38	0	-0.891624	2.03307e-05	0.384579	1.89493e-09	-0.134675	0.00247316
ENSDARG00000020201	cdc73	ENSMUSG00000026361	Cdc73	ortholog_one2one	90.9434	90.7721	25	77.94	1	-0.890183	1.45914e-05	-0.264433	0.000616825	0.142609	0.0428083
ENSDARG00000018000	ubp1	ENSMUSG00000009741	Ubp1	ortholog_one2one	72.4265	72.963	25	45.11	0	-0.889186	0.00437996	-0.352594	6.99198e-07	-0.826761	3.33001e-13
ENSDARG00000001249	pcgf1	ENSMUSG00000069678	Pcgf1	ortholog_one2one	68.1356	81.3765	0	27.56	0	-0.887504	0.0543274	-1.78519	2.20241e-16	-1.50936	7.98286e-15
ENSDARG00000041203	drap1	ENSMUSG00000024914	Drap1	ortholog_one2many	70.6161	70.283	25	71.52	0	-0.887043	0.0312773	1.3736	1.45459e-09	0.650596	0.00010955
ENSDARG00000017562	banp	ENSMUSG00000025316	Banp	ortholog_one2one	71.2598	66.0584	0	70.45	0	-0.885746	0.000327071	0.38723	8.316e-07	-0.0492392	0.458076
ENSDARG00000071152	pick1	ENSMUSG00000068206	Pick1	ortholog_one2one	82.5123	80.5288	0	74.35	1	-0.879422	0.0254886	-0.729831	1.16366e-08	-1.24621	1.10989e-12
ENSDARG00000104835	map3k4	ENSMUSG00000014426	Map3k4	ortholog_one2one	68.5065	66.0614	25	6.24	0	-0.877516	0.150554	0.742882	4.83497e-10	0.426468	5.51699e-06
ENSDARG00000068400	znf131	ENSMUSG00000094870	Zfp131	ortholog_one2one	56.0297	48.7884	25	82.97	1	-0.869654	0.0915238	-0.379454	0.000351952	-0.252312	0.0108602
ENSDARG00000011370	fyna	ENSMUSG00000019843	Fyn	ortholog_one2many	92.365	92.365	0	56.52	0	-0.86755	0.0244869	-0.317729	0.000635428	0.55475	2.96629e-07
ENSDARG00000043332	prkcz	ENSMUSG00000029053	Prkcz	ortholog_one2one	80.9683	81.9257	25	9.39	0	-0.867245	0.0726649	-0.738984	8.67719e-10	-0.603579	2.88776e-08
ENSDARG00000100031	TADA1	ENSMUSG00000026563	Tada1	ortholog_one2one	58.3333	54.3284	0	62.57	0	-0.867087	0.0061412	-0.291544	0.000948919	-0.581887	1.44333e-07
ENSDARG00000053884	med13a	ENSMUSG00000034297	Med13	ortholog_one2many	69.1494	69.2768	100	28.04	1	-0.864455	0.0242299	-1.03671	8.95018e-09	1.09883	1.98754e-11
ENSDARG00000062801	erfl3	ENSMUSG00000003382	Etv3	ortholog_one2many	36.3929	44.0546	0	19.44	0	-0.857607	0.000522115	0.786736	2.60465e-05	0.450481	0.0118189
ENSDARG00000062884	map3k2	ENSMUSG00000024383	Map3k2	ortholog_one2one	79.9358	80.4523	0	59.18	0	-0.85561	0.0118112	0.270386	0.112241	0.37736	0.0275759
ENSDARG00000015540	psen2	ENSMUSG00000010609	Psen2	ortholog_one2one	70.2948	69.1964	0	5.28	0	-0.852282	0.0105364	0.0271718	0.852922	1.19443	3.84682e-11
ENSDARG00000004830	flot2a	ENSMUSG00000061981	Flot2	ortholog_one2many	79.9065	79.9065	50	4.15	0	-0.849057	0.000168133	1.59157	2.12568e-18	1.17093	1.54274e-15
ENSDARG00000012389	adar	ENSMUSG00000027951	Adar	ortholog_one2one	38.4504	45.0764	0	53.16	0	-0.848201	0.0446348	1.00414	1.16855e-09	0.900481	9.32596e-09
ENSDARG00000016783	srsf6b	ENSMUSG00000016921	Srsf6	ortholog_one2many	71.831	75.2212	0	57.59	0	-0.846945	5.58667e-05	0.0446694	0.369399	-0.822646	3.17745e-14
ENSDARG00000058230	rps6kb1b	ENSMUSG00000020516	Rps6kb1	ortholog_one2many	85.4582	81.7143	50	94.01	1	-0.845979	0.0013472	0.23006	0.00374156	0.642919	4.84475e-09
ENSDARG00000018913	hmbox1b	ENSMUSG00000021972	Hmbox1	ortholog_one2many	65.5889	67.619	25	71.89	0	-0.845025	0.154134	-0.371246	0.00287643	-0.0886495	0.475196
ENSDARG00000002970	ss18	ENSMUSG00000037013	Ss18	ortholog_one2one	77.4457	68.1818	0	100	1	-0.843766	6.48685e-05	0.350782	6.97909e-07	0.329208	1.89628e-06
ENSDARG00000077445	ccdc62	ENSMUSG00000061882	Ccdc62	ortholog_one2many	30.6818	19.2582	100	11.66	0	-0.836456	0.0179965	0.636072	0.000509671	1.13501	9.0111e-08
ENSDARG00000004695	six4a	ENSMUSG00000034460	Six4	ortholog_one2many	44.878	35.6129	100	0	0	-0.828098	2.34656e-06	-0.728105	1.63104e-12	-0.627118	3.01108e-11
ENSDARG00000078308	spry2	ENSMUSG00000022114	Spry2	ortholog_one2one	51.1628	48.8889	25	89.9	1	-0.82513	0.000240007	2.02271	7.36987e-11	1.9756	1.27697e-10
ENSDARG00000063574	mtg2	ENSMUSG00000039069	Mtg2	ortholog_one2one	59.0786	53.8272	25	29.92	0	-0.820844	0.0076418	0.567653	6.05693e-08	1.01099	1.48219e-12
ENSDARG00000073737	suds3	ENSMUSG00000066900	Suds3	ortholog_one2one	82.243	79.5181	75	86.47	1	-0.819341	0.00122206	-0.0815861	0.144166	-0.338469	1.68266e-06
ENSDARG00000035986	ptpn2b	ENSMUSG00000024539	Ptpn2	ortholog_one2many	61.3232	59.3596	50	0	0	-0.819215	8.78722e-05	-0.36797	0.000535056	-0.363351	0.000581536
ENSDARG00000062954	clk2a	ENSMUSG00000068917	Clk2	ortholog_one2many	73.7643	77.7555	0	84.51	1	-0.817795	0.000101996	-1.73961	4.91154e-16	-1.21396	4.82331e-13
ENSDARG00000040779	med16	ENSMUSG00000013833	Med16	ortholog_one2one	73.9079	72.3699	0	75.65	1	-0.817293	0.155982	-0.0205073	0.82492	-0.186594	0.00524019
ENSDARG00000004189	cbx1a	ENSMUSG00000018666	Cbx1	ortholog_one2many	69.3396	79.4595	50	26.92	0	-0.81666	0.00104618	0.256854	0.000137417	0.181282	0.00369005
ENSDARG00000061311	znf438	ENSMUSG00000050945	Zfp438	ortholog_one2one	31.6354	29.5739	50	31.37	0	-0.815645	0.0157346	0.832354	2.16103e-07	1.12582	1.20844e-09
ENSDARG00000074161	tnrc6b	ENSMUSG00000047888	Tnrc6b	ortholog_one2many	37.5679	30.5525	0	33.74	0	-0.815337	0.00211947	-0.838478	7.18863e-07	0.920416	1.68384e-09
ENSDARG00000022000	traf3	ENSMUSG00000021277	Traf3	ortholog_one2one	56.0209	56.6138	50	54.12	0	-0.812748	0.120984	-0.0451647	0.75293	-0.0693169	0.540968
ENSDARG00000105114	crebrf	ENSMUSG00000048249	Crebrf	ortholog_one2one	52.8591	59.2188	25	35.99	0	-0.811939	0.00185639	0.0476417	0.862682	0.613791	0.00155606
ENSDARG00000018192	ubr5	ENSMUSG00000037487	Ubr5	ortholog_one2one	88.5897	89.3495	50	100	1	-0.81176	0.0563286	-0.352655	3.23036e-05	0.551799	1.7192e-08
ENSDARG00000030665	TCERG1 (1 of many)	ENSMUSG00000024498	Tcerg1	ortholog_one2many	64.2315	61.5455	25	46.22	0	-0.811136	0.000451977	-0.935043	4.99979e-09	-0.472593	0.000101165
ENSDARG00000078416	zeb2b	ENSMUSG00000026872	Zeb2	ortholog_one2one	69.0117	67.8189	0	75.18	1	-0.8101	0.000849012	0	3.27644e-08	0	6.33799e-12
ENSDARG00000099554	sec16b	ENSMUSG00000026589	Sec16b	ortholog_one2one	33.0481	29.4006	0	3.01	0	-0.809478	0.00747517	0	3.4133e-06	0.250171	0.445689
ENSDARG00000057737	rxraa	ENSMUSG00000015846	Rxra	ortholog_one2many	81.8182	86.7238	0	40.9	0	-0.805214	0.0236065	-0.310073	0.0176263	-1.30012	1.21984e-09
ENSDARG00000045639	elavl4	ENSMUSG00000028546	Elavl4	ortholog_one2one	86.2745	91.4286	75	40.51	1	-0.803756	0.000748248	1.61781	1.55595e-12	0.422467	0.00829782
ENSDARG00000018698	carm1	ENSMUSG00000032185	Carm1	ortholog_one2one	85.2041	82.4013	50	93.51	1	-0.803258	0.0381598	0.523977	0.103104	0.728911	0.0286455
ENSDARG00000027978	yy1b	ENSMUSG00000091736	Yy2	ortholog_many2many	55.6164	53.7037	25	0	0	-0.802191	7.32131e-06	-1.90842	0.154019	-2.0678	0.134487
ENSDARG00000098650	iqgap3	ENSMUSG00000028068	Iqgap3	ortholog_one2one	53.748	41.299	0	50.93	0	-0.802061	0.190467	0	0.240206	0	1
ENSDARG00000053459	rybpb	ENSMUSG00000072872	Rybp	ortholog_one2many	41.4062	69.7368	100	99.07	1	-0.798884	0.0118897	1.00784	4.58668e-08	0.384801	0.00878885
ENSDARG00000104034	arid3b	ENSMUSG00000004661	Arid3b	ortholog_one2one	40.7468	44.1901	0	0	0	-0.797231	0.0059877	-1.79437	5.53416e-17	-1.73317	1.52538e-16
ENSDARG00000068918	map2k2b	ENSMUSG00000035027	Map2k2	ortholog_one2many	84.8867	84.0399	0	0	0	-0.796914	0.00543757	-0.376553	1.46694e-10	-0.489114	1.30982e-12
ENSDARG00000018257	ncoa1	ENSMUSG00000020647	Ncoa1	ortholog_one2one	45.1446	43.3452	25	65.96	0	-0.795986	0.0136192	0.736801	1.6661e-12	0.0279139	0.67157
ENSDARG00000035324	hnrpl	ENSMUSG00000015165	Hnrnpl	ortholog_one2many	76.8657	70.3072	0	87.01	1	-0.792226	5.17054e-05	-0.00175704	1	0.0122983	0.954244
ENSDARG00000078802	rnf111	ENSMUSG00000032217	Rnf111	ortholog_one2one	52.907	55.2073	0	97.63	1	-0.792084	0.0632397	0.582172	1.24468e-06	0.731712	3.0504e-08
ENSDARG00000028894	mrgbp	ENSMUSG00000027569	Mrgbp	ortholog_one2one	64.8781	65.1961	25	61.46	0	-0.790283	0.00388343	0.639633	1.62718e-07	0.426589	5.64467e-05
ENSDARG00000104609	crebbpa	ENSMUSG00000022521	Crebbp	ortholog_one2many	66.7518	64.236	25	35.75	0	-0.785102	0.000514033	0.326717	0.000123263	1.22489	1.08561e-14
ENSDARG00000062361	PAXBP1	ENSMUSG00000022974	Paxbp1	ortholog_one2one	56.1521	54.6246	0	86.07	1	-0.784526	0.00376335	-0.929137	4.96976e-13	-1.18589	8.31179e-15
ENSDARG00000053918	srfa	ENSMUSG00000015605	Srf	ortholog_one2many	54.9165	58.7302	0	61.92	0	-0.781228	0.0395039	0.812361	0.00815716	0.181898	0.701816
ENSDARG00000077012	eif4ea	ENSMUSG00000028156	Eif4e	ortholog_one2many	83.7209	82.9493	25	23.56	0	-0.780653	0.000275229	-1.00528	1.94951e-15	-0.691711	3.25112e-12
ENSDARG00000060068	fam98b	ENSMUSG00000027349	Fam98b	ortholog_one2one	45.5307	37.9953	50	17.29	0	-0.778907	0.000400593	1.35688	2.06386e-09	1.92799	1.16154e-12
ENSDARG00000044216	fto	ENSMUSG00000055932	Fto	ortholog_one2one	29.1005	32.8685	75	4.47	0	-0.773165	0.0239826	0.0125957	0.821045	-0.0142225	0.792356
ENSDARG00000010658	insig1	ENSMUSG00000045294	Insig1	ortholog_one2one	71.7132	69.4981	25	42.06	0	-0.772906	0.0185167	0.355791	0.0544465	0.244089	0.192583
ENSDARG00000074410	brip1	ENSMUSG00000034329	Brip1	ortholog_one2one	47.2862	48.9779	50	44.15	0	-0.772692	0.0444905	-0.260089	0.382739	0	9.90234e-07
ENSDARG00000020749	caprin2	ENSMUSG00000030309	Caprin2	ortholog_one2one	41.7943	37.0514	50	35.51	0	-0.77259	0.0101112	-1.31449	3.03512e-08	-0.758638	2.42006e-05
ENSDARG00000037758	tlr2	ENSMUSG00000027995	Tlr2	ortholog_one2one	38.5086	40.1786	0	31.87	0	-0.769702	0.724384	2.9988	3.21877e-16	1.28822	8.44977e-08
ENSDARG00000019103	kdm4ab	ENSMUSG00000033326	Kdm4a	ortholog_one2many	31.9085	60.3383	50	100	1	-0.769387	0.00748739	-1.27736	3.44579e-13	-1.30924	2.74459e-13
ENSDARG00000101701	bmp5	ENSMUSG00000032179	Bmp5	ortholog_one2one	76.6816	75.3304	50	91.98	1	-0.7682	2.02828e-05	0	0.0132113	0	2.73702e-12
ENSDARG00000099344	PLA2G10	ENSMUSG00000022683	Pla2g10	ortholog_one2one	45.7516	46.3576	0	0	0	-0.766818	0.000506345	0	0.359484	0	0.36599
ENSDARG00000103658	hivep1	ENSMUSG00000021366	Hivep1	ortholog_one2one	40.2809	39.4717	75	8.41	0	-0.766343	0.0141468	0.539585	0.0401446	0.67079	0.00749156
ENSDARG00000055086	ggnbp2	ENSMUSG00000020530	Ggnbp2	ortholog_one2one	64.7218	68.3381	75	86.63	1	-0.765219	0.000932734	-0.0440303	0.590504	0.131874	0.0654681
ENSDARG00000017673	nova2	ENSMUSG00000021047	Nova1	ortholog_one2many	79.3939	77.5148	0	68.3	0	-0.765178	0.00814355	0	4.23853e-09	0	2.62994e-09
ENSDARG00000032327	usp36	ENSMUSG00000033909	Usp36	ortholog_one2one	49.1848	49.4536	100	100	0	-0.759727	0.00121502	0.621141	0.00637455	1.20785	1.57716e-06
ENSDARG00000036593	kdm2ba	ENSMUSG00000029475	Kdm2b	ortholog_one2many	57.561	36.0581	75	4.43	1	-0.75743	0.0471399	-0.0410059	0.944468	0.0119581	1
ENSDARG00000027099	psmc4	ENSMUSG00000030603	Psmc4	ortholog_one2one	96.6507	96.6507	0	14.82	0	-0.754454	0.000689584	-0.536263	2.15818e-09	-0.446261	4.84837e-08
ENSDARG00000057680	foxj2	ENSMUSG00000003154	Foxj2	ortholog_one2one	32.1705	29.3805	0	3.59	0	-0.753414	0.00346713	0.00641887	1	-0.400887	0.00574563
ENSDARG00000037060	kmt2d	ENSMUSG00000048154	Kmt2d	ortholog_one2one	44.2707	26.3422	50	43.48	0	-0.750791	0.00172907	-1.13908	2.25396e-11	-0.00901047	0.977695
ENSDARG00000045527	nr2c1	ENSMUSG00000005897	Nr2c1	ortholog_one2one	58.6667	59.661	100	5.38	1	-0.749593	0.0331979	0.217082	0.0177607	-0.462792	2.2425e-05
ENSDARG00000007034	hnrpkl	ENSMUSG00000021546	Hnrnpk	ortholog_one2many	83.0626	77.1552	25	39.92	0	-0.748349	0.00490174	-0.168864	0.000153787	-0.266189	3.59907e-07
ENSDARG00000063726	cdk12	ENSMUSG00000003119	Cdk12	ortholog_one2one	41.2993	35.9838	75	27.36	0	-0.746552	0.00915605	-0.0993885	0.640481	-0.117852	0.568408
ENSDARG00000074170	fbxo4	ENSMUSG00000022184	Fbxo4	ortholog_one2one	42.6593	40	75	34.65	0	-0.745669	0.0248935	0.480849	0.000280165	0.95856	1.51179e-08
ENSDARG00000034368	hexb	ENSMUSG00000021665	Hexb	ortholog_one2one	58.9649	59.5149	75	12.99	1	-0.740013	0.0330232	0.515381	3.48047e-09	-0.180891	0.0029838
ENSDARG00000005284	fbxl15	ENSMUSG00000025226	Fbxl15	ortholog_one2one	56.129	58	0	16.24	0	-0.73968	0.00205014	-1.06444	5.04476e-09	-0.727138	1.70391e-06
ENSDARG00000041691	bhlhe41	ENSMUSG00000030256	Bhlhe41	ortholog_one2one	48.6936	50	50	85.65	0	-0.739458	0.00251905	1.55974	1.10882e-08	3.10828	1.02852e-16
ENSDARG00000002552	mapkapk2a	ENSMUSG00000016528	Mapkapk2	ortholog_one2many	82.9843	82.1244	100	56.02	1	-0.739407	0.000105268	2.31482	8.48689e-19	0.882555	3.30301e-10
ENSDARG00000044301	atf1	ENSMUSG00000023027	Atf1	ortholog_one2one	55.2632	62.4535	75	11.61	1	-0.739205	0.00694808	0.904913	9.64198e-08	1.02899	1.08372e-08
ENSDARG00000034693	mysm1	ENSMUSG00000062627	Mysm1	ortholog_one2one	51.2165	51.4042	0	5.93	0	-0.737463	0.0040435	-0.00378289	1	1.33928	1.74777e-14
ENSDARG00000075612	ercc6	ENSMUSG00000054051	Ercc6	ortholog_one2one	59.7842	56.1107	50	81.45	1	-0.736966	0.000109521	-1.09906	2.14301e-14	-1.33949	1.04563e-15
ENSDARG00000036956	asxl1	ENSMUSG00000042548	Asxl1	ortholog_one2one	32.798	35.0727	0	34.58	0	-0.736055	0.0174913	1.3378	3.30138e-12	0.627324	3.42897e-06
ENSDARG00000079313	pelp1	ENSMUSG00000018921	Pelp1	ortholog_one2one	34.901	37.667	75	22.48	0	-0.734421	0.243672	0.326357	0.0952872	0.296203	0.138386
ENSDARG00000037038	psmc6	ENSMUSG00000021832	Psmc6	ortholog_one2one	97.1722	97.1722	0	100	1	-0.734208	0.00294645	0.0985343	0.324028	0.0777899	0.46531
ENSDARG00000014463	usf1l	ENSMUSG00000026641	Usf1	ortholog_one2many	57.5563	57.7419	50	0	0	-0.733847	0.00392655	-0.712677	6.15751e-07	-0.00333879	1
ENSDARG00000006200	eif4g1a	ENSMUSG00000045983	Eif4g1	ortholog_one2many	54.5265	32.75	50	61.01	0	-0.730737	0.281477	0.726084	4.57337e-08	0.718942	5.84817e-08
ENSDARG00000079388	agrn	ENSMUSG00000041936	Agrn	ortholog_one2one	51.1423	48.4267	100	65.69	1	-0.72811	0.00369513	2.44284	7.42388e-15	2.66006	1.13375e-15
ENSDARG00000002006	rxrbb	ENSMUSG00000039656	Rxrb	ortholog_one2many	69.6682	56.1069	0	7.67	0	-0.726185	0.00446105	0.445727	3.735e-06	-0.500218	1.09997e-06
ENSDARG00000044267	sumo1	ENSMUSG00000026021	Sumo1	ortholog_one2one	84	83.1683	75	48.16	1	-0.723149	3.97194e-05	-0.0558483	0.25795	-0.17834	0.000682205
ENSDARG00000103953	med12	ENSMUSG00000079487	Med12	ortholog_one2one	73.1494	72.6484	0	86.27	1	-0.721284	0.00698855	0.467412	0.000337056	0.604722	1.23237e-05
ENSDARG00000036755	prmt9	ENSMUSG00000037134	Prmt9	ortholog_one2one	53.7835	54.6099	100	45.64	1	-0.720042	0.0250492	-0.343495	0.00153186	0.0198263	0.911853
ENSDARG00000032919	chchd3a	ENSMUSG00000053768	Chchd3	ortholog_one2many	20.6208	40.9692	75	40.61	0	-0.719315	0.020967	0.52905	9.10556e-05	0.116461	0.358679
ENSDARG00000101059	dhx36	ENSMUSG00000027770	Dhx36	ortholog_one2one	64.0309	66.3337	0	32.88	0	-0.718853	0.000394274	0.00885364	0.957329	0.161927	0.0202169
ENSDARG00000077987	zfat	ENSMUSG00000022335	Zfat	ortholog_one2one	58.2483	55.3759	0	36.42	0	-0.718229	0.0879477	0.485912	0.00789967	0.892454	6.18604e-06
ENSDARG00000013441	hey2	ENSMUSG00000019789	Hey2	ortholog_one2one	72.5309	69.3215	50	100	1	-0.71737	0.00366437	1.23961	1.73525e-14	-0.0472021	0.679827
ENSDARG00000104861	rprd1a	ENSMUSG00000040446	Rprd1a	ortholog_one2one	72.4359	72.4359	0	98.57	1	-0.716928	0.0843294	0.706275	1.40065e-08	0.0884974	0.343213
ENSDARG00000006389	smad2	ENSMUSG00000024563	Smad2	ortholog_one2one	94.6695	95.0749	50	51.07	0	-0.713525	0.000553065	1.07226	2.89465e-09	0.548712	8.49584e-05
ENSDARG00000058267	glmna	ENSMUSG00000029276	Glmn	ortholog_one2many	50	49.6644	50	16.68	0	-0.71129	0.0329943	-1.69422	3.02177e-14	-0.781365	2.66827e-08
ENSDARG00000059246	hnrnpd	ENSMUSG00000000568	Hnrnpd	ortholog_one2one	83.4395	73.8028	50	32.65	0	-0.710503	0.000244028	0.0250577	0.902889	0.181833	0.118841
ENSDARG00000014569	hnrnpr	ENSMUSG00000066037	Hnrnpr	ortholog_one2one	84.7861	84.6519	0	75.41	1	-0.706593	0.0860322	-0.0147124	0.822865	0.240518	1.17565e-05
ENSDARG00000070164	ubr2	ENSMUSG00000023977	Ubr2	ortholog_one2one	71.8022	71.9658	25	41.38	0	-0.704977	0.00534692	-0.297702	0.00644985	0.240351	0.0188295
ENSDARG00000021378	phf21ab	ENSMUSG00000058318	Phf21a	ortholog_one2one	46.3568	53.6337	50	25.83	0	-0.703491	0.15456	0.969967	4.38718e-09	1.50649	3.81587e-13
ENSDARG00000025071	brd8	ENSMUSG00000003778	Brd8	ortholog_many2many	51.4286	45.4259	25	61.87	0	-0.703121	0.00777851	-0.634427	1.0161e-09	-0.135922	0.0427666
ENSDARG00000070371	kat7a	ENSMUSG00000038909	Kat7	ortholog_one2many	85.1485	84.4517	0	5.28	0	-0.701432	0.00115708	0.350143	1.62994e-05	0.549532	2.10497e-08
ENSDARG00000026634	ehmt1b	ENSMUSG00000036893	Ehmt1	ortholog_one2many	49.3862	40.3549	50	3.96	0	-0.700328	0.0148723	-0.332299	0.00137353	0.551869	9.2314e-07
ENSDARG00000034616	mlf2	ENSMUSG00000030120	Mlf2	ortholog_one2one	54	54.6559	0	70.48	0	-0.696134	0.000333924	-1.37357	1.23804e-17	-1.17754	4.00611e-16
ENSDARG00000009170	ctr9	ENSMUSG00000005609	Ctr9	ortholog_one2one	86.2931	85.3367	100	52.06	1	-0.694882	7.52713e-05	-0.511546	1.58477e-07	0.0575539	0.43589
ENSDARG00000016514	gtf2h2	ENSMUSG00000021639	Gtf2h2	ortholog_one2one	81.1225	80.303	50	97.38	1	-0.691915	0.0406775	-0.545337	7.31389e-06	-0.0699295	0.466177
ENSDARG00000105098	dr1	ENSMUSG00000029265	Dr1	ortholog_one2one	93.75	93.75	0	63.89	0	-0.689715	0.00487566	-0.960992	3.4305e-15	-2.49414	2.12677e-22
ENSDARG00000016763	znf292a	ENSMUSG00000039967	Zfp292	ortholog_one2many	32.9008	31.9496	25	0.73	0	-0.686157	0.028691	0.250067	0.00524553	1.04232	4.59127e-12
ENSDARG00000027187	kat8	ENSMUSG00000030801	Kat8	ortholog_one2one	76.6932	84.0611	25	78.81	1	-0.685643	0.000460251	-0.0800613	0.404069	-0.317973	0.00221295
ENSDARG00000070809	znf516	ENSMUSG00000058881	Zfp516	ortholog_one2one	33.9483	31.8064	25	54	0	-0.683667	0.00882441	0.718012	6.99133e-06	0.564292	0.000202297
ENSDARG00000058461	ice1	ENSMUSG00000034525	Ice1	ortholog_one2one	27.6995	18.4293	0	3.19	0	-0.683122	0.0477783	0.0510266	0.6849	-0.689596	6.24405e-07
ENSDARG00000037514	hdac3	ENSMUSG00000024454	Hdac3	ortholog_one2one	92.5234	92.5234	0	99.73	1	-0.682949	0.000100629	-1.06843	3.27944e-13	-1.18448	5.70338e-14
ENSDARG00000056623	ptenb	ENSMUSG00000013663	Pten	ortholog_one2one	82.7014	86.6005	100	58.14	1	-0.682387	0.00155287	-0.399693	3.06317e-05	0.213744	0.0104122
ENSDARG00000070477	dnajc2	ENSMUSG00000029014	Dnajc2	ortholog_one2one	74.11	73.752	25	43.93	0	-0.681045	0.120921	-0.373889	0.00857325	-0.664759	4.63712e-05
ENSDARG00000032102	prdx3	ENSMUSG00000024997	Prdx3	ortholog_one2one	66.1922	72.3735	0	30.78	0	-0.680683	0.00534808	0.213205	0.00293292	0.270035	0.000346013
ENSDARG00000059707	ZNF423	ENSMUSG00000045333	Zfp423	ortholog_one2one	74.5788	78.7926	0	49.72	0	-0.67737	0.0482118	1.22352	1.35637e-10	-0.480525	0.00140975
ENSDARG00000037020	kif1b	ENSMUSG00000063077	Kif1b	ortholog_one2one	87.6271	85.4075	75	100	1	-0.676958	0.0264646	0.189704	0.0352247	0.646521	4.95621e-08
ENSDARG00000017500	rock2a	ENSMUSG00000020580	Rock2	ortholog_one2many	60.5744	16.7147	25	16.3	0	-0.675811	0.0081294	0.599984	3.59303e-06	0.447626	0.00016617
ENSDARG00000104531	zcchc4	ENSMUSG00000029179	Zcchc4	ortholog_one2one	53.3058	50.3906	0	46.53	0	-0.669759	0.238731	0.84051	3.93615e-09	-0.569847	7.55288e-05
ENSDARG00000058729	akirin2	ENSMUSG00000028291	Akirin2	ortholog_one2one	80	71.6418	50	56	0	-0.667683	0.00287414	0.384849	2.58589e-05	-0.149571	0.0689804
ENSDARG00000102295	dnaja3b	ENSMUSG00000004069	Dnaja3	ortholog_one2many	59.7046	58.9583	25	63.56	0	-0.66717	0.0258317	0.175851	0.014569	-0.305519	0.000129235
ENSDARG00000024844	max	ENSMUSG00000059436	Max	ortholog_one2one	83.9744	81.875	25	100	1	-0.664965	4.25253e-05	-1.18253	6.14333e-09	0.409726	0.00294318
ENSDARG00000008947	rtf1	ENSMUSG00000027304	Rtf1	ortholog_one2one	79.4579	77.9021	50	46.19	0	-0.663874	0.00256	0.551563	1.58181e-07	0.571408	9.47949e-08
ENSDARG00000052182	rbfox2	ENSMUSG00000033565	Rbfox2	ortholog_one2one	73.8589	39.6437	0	10.67	0	-0.663147	0.0121855	-2.22502	3.49237e-10	-1.8675	2.73737e-09
ENSDARG00000036831	rnf41	ENSMUSG00000025373	Rnf41	ortholog_one2one	89.9371	90.2208	50	86.58	1	-0.662879	0.177494	-0.715356	1.32103e-07	-0.467339	4.68437e-05
ENSDARG00000012688	eif1b	ENSMUSG00000035530	Eif1	ortholog_one2one	92.0354	92.0354	75	100	1	-0.662534	0.00493204	0.169046	0.000843307	0.0987087	0.038137
ENSDARG00000055792	foxo4	ENSMUSG00000042903	Foxo4	ortholog_one2one	37.6997	46.7327	75	83.67	0	-0.661002	0.0215101	0	0.638088	0	0.561178
ENSDARG00000101009	cited4b	ENSMUSG00000070803	Cited4	ortholog_one2many	27.5	36.2637	25	0	0	-0.660758	0.000754433	0.769476	1.41969e-06	0.481934	0.000644062
ENSDARG00000056331	ahcyl1	ENSMUSG00000027893	Ahcyl1	ortholog_one2one	83.7545	87.5472	0	5.37	0	-0.657529	0.0250597	0.606247	2.23712e-09	0.430049	6.83048e-07
ENSDARG00000017843	srsf1b	ENSMUSG00000018379	Srsf1	ortholog_one2many	91.8605	95.5645	0	7.44	0	-0.657071	5.34738e-05	-0.577326	2.55735e-13	-0.681151	1.42144e-14
ENSDARG00000004537	kmt2a	ENSMUSG00000002028	Kmt2a	ortholog_one2one	46.812	49.836	25	61.97	0	-0.655799	0.00424872	-0.265112	0.00526428	0.768935	4.3443e-10
ENSDARG00000007169	itgb1bp1	ENSMUSG00000062352	Itgb1bp1	ortholog_one2one	77.2727	76.5	75	100	1	-0.653011	0.0261725	-1.25411	1.79317e-14	-1.18486	6.66696e-14
ENSDARG00000053196	mtor	ENSMUSG00000028991	Mtor	ortholog_one2one	89.0753	89.5645	0	54.58	0	-0.652554	0.00210478	1.03718	1.15954e-09	-0.0914724	0.512365
ENSDARG00000027403	zgpat	ENSMUSG00000027582	Zgpat	ortholog_one2one	50	49.3151	25	66.71	0	-0.651853	0.00167991	-0.0174108	0.879174	-0.565186	9.78454e-07
ENSDARG00000057414	phb	ENSMUSG00000038845	Phb	ortholog_one2one	91.1439	90.8088	50	100	1	-0.651689	0.0619479	0.0118648	1	0.14196	0.339731
ENSDARG00000029248	fubp1	ENSMUSG00000028034	Fubp1	ortholog_one2one	71.8069	71.8069	50	91.25	1	-0.650248	0.0089371	-0.512769	5.41816e-11	-0.502357	8.57103e-11
ENSDARG00000078133	kdm2ab	ENSMUSG00000054611	Kdm2a	ortholog_one2many	51.7159	55.814	25	3.07	0	-0.648903	0.0114526	0.345503	0.000878113	0.592867	6.81001e-07
ENSDARG00000007496	ufl1	ENSMUSG00000040359	Ufl1	ortholog_one2one	63.0517	63.0517	50	96.12	1	-0.648325	0.123388	-0.60627	1.43801e-09	-0.284907	0.000104853
ENSDARG00000089787	crebzf	ENSMUSG00000051451	Crebzf	ortholog_one2one	37.3016	26.257	0	53.35	0	-0.648246	0.00390679	-1.32026	2.3694e-13	-1.08479	1.01008e-11
ENSDARG00000070828	actl6a	ENSMUSG00000027671	Actl6a	ortholog_one2one	88.345	88.345	50	97.69	1	-0.647943	0.00882103	-0.281783	0.00723496	-0.0819365	0.457422
ENSDARG00000051761	trim44	ENSMUSG00000027189	Trim44	ortholog_one2one	30.6122	26.087	75	71.85	0	-0.645944	0.0454212	-0.182001	0.000100305	-0.0705254	0.091534
ENSDARG00000009472	med19b	ENSMUSG00000027080	Med19	ortholog_one2many	63.7066	67.6229	25	53.54	0	-0.639638	0.00648378	-0.190833	0.0658238	-0.805127	4.23317e-08
ENSDARG00000094704	bcl2a	ENSMUSG00000057329	Bcl2	ortholog_one2many	42.1053	40.678	0	0	0	-0.639382	0.0205609	-1.14355	6.15291e-16	-1.49246	6.32163e-18
ENSDARG00000021324	nsun4	ENSMUSG00000028706	Nsun4	ortholog_one2one	53.6896	55.3806	25	36.52	0	-0.635325	0.0477783	0.358525	0.000137645	0.313395	0.000624526
ENSDARG00000099015	wacb	ENSMUSG00000024283	Wac	ortholog_one2one	57.9926	24.1486	0	20.25	0	-0.634737	0.00462649	-0.376317	1.41318e-07	-0.361098	2.9504e-07
ENSDARG00000056127	polr2gl	ENSMUSG00000071662	Polr2g	ortholog_one2one	98.8372	98.8372	0	98.76	1	-0.628143	0.000324197	-1.24026	3.77088e-10	-1.6771	1.63465e-12
ENSDARG00000009346	caprin1a	ENSMUSG00000027184	Caprin1	ortholog_one2one	57.3134	54.314	0	62.65	0	-0.627306	0.00305342	-0.236637	5.99665e-06	-0.560196	3.68289e-12
ENSDARG00000006266	stat1a	ENSMUSG00000026104	Stat1	ortholog_one2many	61.0147	60.5298	0	25.56	0	-0.626226	0.000313279	2.51612	1.09105e-21	1.56545	5.05678e-17
ENSDARG00000052654	thrab	ENSMUSG00000058756	Thra	ortholog_one2many	72.3653	62.8049	0	0.39	0	-0.625725	0.134713	0.787367	1.89794e-08	0.108177	0.306304
ENSDARG00000042236	atrx	ENSMUSG00000031229	Atrx	ortholog_one2one	57.5261	46.769	25	28.16	0	-0.616195	0.00164203	-0.360812	7.23786e-09	0.353623	5.63224e-09
ENSDARG00000040700	nab1b	ENSMUSG00000002881	Nab1	ortholog_one2one	59.2	60.9053	100	92.88	1	-0.609136	0.281985	0.426532	1.77197e-06	0.673823	9.79605e-10
ENSDARG00000010432	eaf2	ENSMUSG00000022838	Eaf2	ortholog_one2one	62.5483	61.8321	0	63.84	0	-0.608753	0.0285909	-0.469392	0.304549	-0.539815	0.234605
ENSDARG00000093182	eif2ak1	ENSMUSG00000029613	Eif2ak1	ortholog_one2one	39.8204	42.9725	0	15.6	0	-0.608063	0.000206414	0.890829	6.73261e-10	0.0393089	0.76726
ENSDARG00000006524	supt6h	ENSMUSG00000002052	Supt6	ortholog_one2one	80.7648	80.7648	25	99.64	1	-0.606194	0.00504416	0.221974	0.00829374	0.464494	3.29245e-06
ENSDARG00000017798	bcor	ENSMUSG00000040363	Bcor	ortholog_one2one	38.1403	38.9426	50	35.35	0	-0.606112	0.00756696	1.87911	9.95117e-06	1.73965	4.83932e-05
ENSDARG00000103004	tpra	ENSMUSG00000006005	Tpr	ortholog_one2one	57.6386	56.0263	75	6.61	1	-0.60604	0.181041	-0.400108	2.39122e-05	0.27162	0.00137305
ENSDARG00000098924	suz12b	ENSMUSG00000017548	Suz12	ortholog_one2many	74.1936	68.2861	100	86.14	1	-0.604163	0.0429181	-0.680568	1.95329e-06	-0.434504	0.000383106
ENSDARG00000070050	sfrp2	ENSMUSG00000027996	Sfrp2	ortholog_one2one	69.7279	69.4915	50	66.62	0	-0.603578	0.000269435	0	0.271801	0	0.379875
ENSDARG00000104049	crebl2	ENSMUSG00000032652	Crebl2	ortholog_one2one	79.8319	77.2358	50	20.38	0	-0.60133	0.0177299	0.989893	2.15895e-08	-0.160795	0.243636
ENSDARG00000015853	rnps1	ENSMUSG00000034681	Rnps1	ortholog_one2many	79.5053	73.7705	0	10.41	0	-0.591791	0.168177	-0.746097	1.79447e-10	-0.552002	3.73094e-08
ENSDARG00000025953	rhoq	ENSMUSG00000024143	Rhoq	ortholog_one2one	89.7561	89.7561	50	62.79	0	-0.591115	0.136639	1.02172	4.28896e-13	1.32292	3.24865e-15
ENSDARG00000102546	cdk11b	ENSMUSG00000029062	Cdk11b	ortholog_one2one	76	77.551	50	71.62	0	-0.591031	0.0849566	0.0307803	0.85394	-0.260834	0.0226169
ENSDARG00000035910	znf281b	ENSMUSG00000041483	Zfp281	ortholog_one2many	35.689	33.9306	0	2.33	0	-0.589263	0.283731	-0.444137	0.00192342	-0.248483	0.0688377
ENSDARG00000061398	epb41l4b	ENSMUSG00000028434	Epb41l4b	ortholog_one2one	57.451	55.5977	25	83.02	1	-0.588629	0.0630364	0.855565	1.15227e-07	0.973537	1.28484e-08
ENSDARG00000012656	atf6	ENSMUSG00000026663	Atf6	ortholog_one2one	43.7979	43.5976	25	0.59	0	-0.588402	0.250155	-0.582366	2.18161e-05	0.208521	0.0679528
ENSDARG00000003098	kdm5bb	ENSMUSG00000042207	Kdm5b	ortholog_one2many	62.2309	61.7876	0	49.16	0	-0.587127	0.223251	-0.914016	5.06183e-12	-0.6964	7.76663e-10
ENSDARG00000027182	rnf25	ENSMUSG00000026171	Rnf25	ortholog_one2one	31.9688	35.9649	0	13.19	0	-0.583593	0.00418579	-0.175799	0.126225	-0.190005	0.094834
ENSDARG00000086977	atxn1l	ENSMUSG00000069895	Atxn1l	ortholog_one2one	36.3399	40.4658	25	48.39	0	-0.583573	0.0781696	-0.40353	0.0952872	-0.211663	0.376765
ENSDARG00000013777	ppp1r13l	ENSMUSG00000040734	Ppp1r13l	ortholog_one2one	35.7414	34.2233	0	15.25	0	-0.581583	0.00479622	-0.172597	0.579315	1.27293	1.79913e-06
ENSDARG00000010878	cdkn1ca	ENSMUSG00000037664	Cdkn1c	ortholog_one2many	26.1628	12.931	25	15.18	0	-0.5784	0.222873	3.3602	3.18574e-12	4.57792	3.05211e-15
ENSDARG00000041875	ube2v1	ENSMUSG00000078923	Ube2v1	ortholog_one2one	74.2331	69.9422	0	0	0	-0.575873	0.00987327	-0.0597423	0.90269	0.0343724	0.990671
ENSDARG00000103125	TSC2	ENSMUSG00000002496	Tsc2	ortholog_one2one	59.4385	57.1183	50	76.61	1	-0.574236	0.0465962	-0.794499	9.57396e-12	-0.465939	1.06619e-07
ENSDARG00000038967	cul3a	ENSMUSG00000004364	Cul3	ortholog_one2many	95.6072	96.3542	0	87.47	1	-0.5728	0.000133266	-0.315102	2.54558e-05	-0.352604	5.88537e-06
ENSDARG00000028379	trub2	ENSMUSG00000039826	Trub2	ortholog_one2one	43.75	46.5257	0	0	0	-0.571786	0.0012515	-0.492838	0.000107787	-0.798235	2.43748e-07
ENSDARG00000087897	h2afy2	ENSMUSG00000020086	H2afy2	ortholog_one2one	73.5695	72.5806	25	81.83	1	-0.566873	0.00371724	0.704412	3.55743e-07	0.413217	0.000448547
ENSDARG00000070278	mettl14	ENSMUSG00000028114	Mettl14	ortholog_one2one	84.1758	83.9912	50	100	1	-0.559529	0.0448295	0.740243	2.78312e-08	0.328853	0.0020675
ENSDARG00000077075	fastk	ENSMUSG00000028959	Fastk	ortholog_one2one	23.0853	38.7156	0	14.57	0	-0.556393	0.251515	-0.355447	0.000245288	-0.285419	0.00209748
ENSDARG00000030368	naa15b	ENSMUSG00000063273	Naa15	ortholog_one2many	84.1618	84.1618	0	99.67	1	-0.555123	0.0286454	-0.113524	0.118484	-0.25403	0.00114467
ENSDARG00000099727	ssbp2	ENSMUSG00000003992	Ssbp2	ortholog_one2many	86.5714	83.9335	75	61.48	1	-0.554351	0.000832923	-0.86701	7.37168e-12	1.08701	8.65301e-15
ENSDARG00000071878	trmt112	ENSMUSG00000038812	Trmt112	ortholog_one2one	63.9344	62.4	25	0	0	-0.553519	0.204562	-0.103851	0.108069	-0.326841	2.60702e-05
ENSDARG00000011948	insra	ENSMUSG00000005534	Insr	ortholog_one2many	69.2535	68.2945	0	1.86	0	-0.551865	0.0605028	0.8021	0.00020496	0.965422	1.73847e-05
ENSDARG00000060012	f2r	ENSMUSG00000048376	F2r	ortholog_one2one	41.1622	39.5349	25	38.03	0	-0.550552	0.0769404	-2.95368	3.58959e-23	-1.2363	1.43502e-15
ENSDARG00000013168	jag1b	ENSMUSG00000027276	Jag1	ortholog_one2many	73.784	73.4811	100	40.11	1	-0.549507	0.035227	-0.0992215	0.23977	1.29797	1.96587e-14
ENSDARG00000076791	cdk13	ENSMUSG00000041297	Cdk13	ortholog_one2one	50.2715	42.8855	0	86.46	1	-0.549033	0.232231	0.101172	0.183304	0.188644	0.0117238
ENSDARG00000026806	taf8	ENSMUSG00000023980	Taf8	ortholog_one2one	73.3766	73.3766	0	84.13	1	-0.547353	0.0028145	-0.119904	0.152979	-0.859741	4.77344e-10
ENSDARG00000069289	gabpa	ENSMUSG00000008976	Gabpa	ortholog_one2one	74.0659	74.2291	25	95.88	1	-0.546902	0.00712922	-0.143851	0.243847	-0.615656	3.22692e-05
ENSDARG00000070834	taf13	ENSMUSG00000048100	Taf13	ortholog_one2one	88.7097	88.7097	0	68.71	0	-0.546891	0.00540985	0.13534	0.0715091	0.413101	5.19595e-06
ENSDARG00000077264	wdr43	ENSMUSG00000041057	Wdr43	ortholog_one2one	55.2308	53.0281	25	56.04	0	-0.544772	0.0189524	-0.328598	0.0131016	0.0725656	0.634377
ENSDARG00000103665	BRPF1	ENSMUSG00000001632	Brpf1	ortholog_one2one	60.8419	61.4274	0	73.2	0	-0.544321	0.00950943	-0.0986041	0.370856	-0.367286	0.00155064
ENSDARG00000001734	fkbp8	ENSMUSG00000019428	Fkbp8	ortholog_one2one	53.6946	54.0943	25	5.87	0	-0.542631	0.00635355	0.0200375	0.811345	-0.149063	0.0222662
ENSDARG00000076939	znf451	ENSMUSG00000042197	Zfp451	ortholog_one2one	35.917	31.1553	100	4.35	0	-0.54144	0.00638448	-0.898907	1.82868e-13	-0.118558	0.0346263
ENSDARG00000013966	psma6b	ENSMUSG00000021024	Psma6	ortholog_one2many	89.8374	89.8374	25	54.27	0	-0.541005	0.00617069	0.154197	0.00885424	-0.0759279	0.194819
ENSDARG00000102974	baz2a	ENSMUSG00000040054	Baz2a	ortholog_one2one	31.2602	40.7525	25	15.16	0	-0.539304	0.148546	-0.947674	1.39326e-09	-0.287526	0.00438379
ENSDARG00000045297	phb2a	ENSMUSG00000004264	Phb2	ortholog_one2many	79.2079	80.2676	0	5.14	0	-0.537499	0.00840658	0.318502	0.0323571	-0.0448424	0.843342
ENSDARG00000016664	rnf20	ENSMUSG00000028309	Rnf20	ortholog_one2one	59.4274	61.8705	25	11.26	0	-0.537426	0.00371144	-0.128015	0.0329074	-0.522144	6.33142e-09
ENSDARG00000044422	acvr2b	ENSMUSG00000061393	Acvr2b	ortholog_one2many	76.2745	72.5746	25	17.39	0	-0.536501	0.150576	-0.317922	0.0525887	0.744315	4.87123e-05
ENSDARG00000056847	si:dkey-27c15.3	ENSMUSG00000054199	Gon4l	ortholog_one2many	34.3321	24.5317	0	2.74	0	-0.535803	0.126288	0.497169	0.00670271	0.636161	0.000713088
ENSDARG00000025467	aatf	ENSMUSG00000018697	Aatf	ortholog_one2one	49.5606	53.6122	75	60.9	1	-0.534654	0.0261831	0.157535	0.229728	0.312886	0.0205123
ENSDARG00000089456	men1	ENSMUSG00000024947	Men1	ortholog_one2one	65.6402	65.6402	25	66.93	0	-0.532006	0.0141207	0.343073	0.00119	-0.0618783	0.578293
ENSDARG00000010010	trim13	ENSMUSG00000035235	Trim13	ortholog_one2one	48.0676	48.8943	50	72.4	0	-0.530515	0.0965575	0.918473	4.09573e-09	0.0273349	0.877265
ENSDARG00000070787	jupa	ENSMUSG00000001552	Jup	ortholog_one2many	68.7243	67.2483	0	0	0	-0.528934	0.00388343	-1.07815	2.64959e-15	-0.860637	2.6701e-13
ENSDARG00000018060	pik3r2	ENSMUSG00000031834	Pik3r2	ortholog_one2one	61.326	61.4958	50	51.07	0	-0.528557	0.00460752	-0.305976	6.30526e-05	-0.176172	0.0104895
ENSDARG00000091402	eif2b1	ENSMUSG00000029388	Eif2b1	ortholog_one2one	75.8278	75.082	25	26.36	0	-0.524487	0.00162992	0.184302	0.0199546	0.058174	0.497661
ENSDARG00000099453	elof1	ENSMUSG00000013822	Elof1	ortholog_one2one	93.9759	93.9759	25	100	1	-0.521725	0.00260742	-0.408073	9.88037e-09	-0.283948	2.90189e-06
ENSDARG00000012078	meis1b	ENSMUSG00000020160	Meis1	ortholog_one2one	92.268	76.9893	50	100	1	-0.521095	0.0322626	0	1.12462e-09	0	6.90332e-13
ENSDARG00000070187	dyrk1b	ENSMUSG00000002409	Dyrk1b	ortholog_one2one	56.3249	61.3933	25	4.54	0	-0.520474	0.0179971	-0.423129	4.42083e-06	-0.621668	1.32807e-08
ENSDARG00000016516	rbm8a	ENSMUSG00000078184	Rbm8a2	ortholog_one2many	90.8046	90.8046	0	53.65	0	-0.518179	0.00761934	-0.705321	0.77793	0.366249	0.860897
ENSDARG00000098919	smarcc1b	ENSMUSG00000032481	Smarcc1	ortholog_one2many	69.3297	68.3877	25	2.54	0	-0.515993	0.00491111	-0.153878	0.0439464	0.317502	0.000157642
ENSDARG00000011740	u2af2b	ENSMUSG00000030435	U2af2	ortholog_one2many	85.8947	85.8947	25	5.15	0	-0.513181	0.0709038	0.706342	0.000303566	0.987413	3.48137e-06
ENSDARG00000098350	mxd3	ENSMUSG00000021485	Mxd3	ortholog_one2one	57.5	55.8252	25	80.24	1	-0.510962	0.115574	0	0.000181383	0	0.282034
ENSDARG00000036055	thap11	ENSMUSG00000036442	Thap11	ortholog_one2one	54.0856	45.5738	0	49.93	0	-0.51055	0.00180809	-0.00839798	0.921079	-0.362459	1.1085e-06
ENSDARG00000011662	chuk	ENSMUSG00000025199	Chuk	ortholog_one2one	62.533	63.6242	0	75.14	1	-0.509764	0.0151872	-0.342592	0.0211861	0.0352155	0.891239
ENSDARG00000010381	rnf2	ENSMUSG00000026484	Rnf2	ortholog_one2one	88.7574	89.2857	25	99.95	1	-0.509641	0.000744446	-0.192246	0.0295718	-0.330876	0.000563065
ENSDARG00000079605	prmt5	ENSMUSG00000023110	Prmt5	ortholog_one2one	78.7639	78.022	0	98.78	1	-0.508435	0.0564794	-0.0484634	0.699907	0.0529246	0.676451
ENSDARG00000041110	dnajc3a	ENSMUSG00000022136	Dnajc3	ortholog_one2one	70.8333	70.8333	50	43.69	0	-0.507944	0.114507	0.0921598	0.514424	0.162874	0.223739
ENSDARG00000056307	znf706	ENSMUSG00000062397	Zfp706	ortholog_one2one	81.5789	81.5789	75	100	1	-0.507671	0.0011574	-0.265064	0.000293316	0.198782	0.00422805
ENSDARG00000101380	cryabb	ENSMUSG00000032060	Cryab	ortholog_one2many	56.6667	58.2857	50	61.25	0	-0.507561	0.000115778	2.27059	1.55409e-25	1.15325	2.50719e-19
ENSDARG00000099256	pum1	ENSMUSG00000028580	Pum1	ortholog_one2one	80.4252	76.3667	100	93.29	1	-0.507037	0.0295417	-0.123535	0.154123	0.574183	2.44568e-07
ENSDARG00000063229	xpo1b	ENSMUSG00000020290	Xpo1	ortholog_one2one	96.2652	96.2652	0	14.95	0	-0.50611	0.151552	0.124081	0.208338	-0.407928	0.000197898
ENSDARG00000088347	sp1	ENSMUSG00000001280	Sp1	ortholog_one2one	51.0101	38.7964	0	14.48	0	-0.502627	0.0210167	-0.0323563	0.89713	0.397087	0.00387839
ENSDARG00000060641	prkaa2	ENSMUSG00000028518	Prkaa2	ortholog_one2one	88.2459	88.4058	25	100	1	-0.501881	0.0730979	-0.651094	0.000886451	-0.629132	0.00122363
ENSDARG00000045857	cebpz	ENSMUSG00000024081	Cebpz	ortholog_one2many	53.9474	3.89734	0	85.72	1	-0.498238	0.0857417	-1.2161	1.00778e-14	-0.844896	9.52257e-12
ENSDARG00000041381	arntl2	ENSMUSG00000040187	Arntl2	ortholog_one2one	42.9477	46.8048	25	7.2	0	-0.496153	0.182826	-0.851568	0.00684543	-0.12069	0.724342
ENSDARG00000017803	gsk3b	ENSMUSG00000022812	Gsk3b	ortholog_one2many	89.4988	86.6051	100	0.8	1	-0.49598	0.14801	-0.413164	5.95855e-06	0.519354	8.37197e-08
ENSDARG00000078473	nucks1a	ENSMUSG00000026434	Nucks1	ortholog_one2many	45.2459	58.9744	50	24.42	0	-0.495393	0.00106876	0.194484	0.00595288	0.913786	7.07624e-13
ENSDARG00000099516	mettl23	ENSMUSG00000090266	Mettl23	ortholog_one2many	61.2121	39.9209	75	78.61	1	-0.492433	0.142728	-0.189952	0.287824	-0.652735	0.000787053
ENSDARG00000043608	eif4ebp1	ENSMUSG00000031490	Eif4ebp1	ortholog_one2one	60.8333	62.3932	0	15.84	0	-0.4895	8.28585e-05	2.10536	8.48125e-12	2.59667	5.89315e-14
ENSDARG00000040237	mef2d	ENSMUSG00000001419	Mef2d	ortholog_one2one	61.2676	67.7043	0	61.22	0	-0.487731	0.00392405	0.0452539	0.799266	-0.191961	0.130939
ENSDARG00000104030	taf12	ENSMUSG00000028899	Taf12	ortholog_one2one	80.8642	81.3665	0	15.86	0	-0.484394	0.00256493	0.481669	2.27248e-08	0.29612	3.35716e-05
ENSDARG00000023591	nrbf2b	ENSMUSG00000075000	Nrbf2	ortholog_one2many	58.7045	50.5226	50	44.53	0	-0.480626	0.0433095	-0.341001	0.000287116	-0.0222821	0.882211
ENSDARG00000004343	nelfe	ENSMUSG00000024369	Nelfe	ortholog_one2one	66.763	62.9428	25	98.23	1	-0.479434	0.00351419	0.079065	0.405978	-0.162773	0.0777192
ENSDARG00000042477	nr2c2	ENSMUSG00000005893	Nr2c2	ortholog_one2one	78.1701	77.4245	50	96.47	1	-0.478636	0.0305743	0.16281	0.511984	0.745366	0.00173527
ENSDARG00000003531	tcea1	ENSMUSG00000033813	Tcea1	ortholog_one2one	72.8155	72.1154	50	98.12	1	-0.477332	0.00691954	-0.313347	5.89756e-05	-0.27466	0.000282825
ENSDARG00000007657	ccnh	ENSMUSG00000021548	Ccnh	ortholog_one2one	64.5768	63.7771	100	50.43	1	-0.47426	0.00616645	-0.254792	0.000468491	-0.317107	4.51549e-05
ENSDARG00000019572	taf7	ENSMUSG00000051316	Taf7	ortholog_one2one	67.1271	71.261	0	62.27	0	-0.473983	0.000779675	-0.704125	4.25994e-05	-0.547945	0.000735709
ENSDARG00000007693	nfkbiab	ENSMUSG00000021025	Nfkbia	ortholog_one2many	50	49.6815	50	0	0	-0.473257	0.123446	-0.540447	3.80171e-10	-0.251023	5.29706e-05
ENSDARG00000016399	riok1	ENSMUSG00000021428	Riok1	ortholog_one2one	66.5468	65.2557	25	69.99	0	-0.464731	0.0199797	0.133729	0.216536	-0.12165	0.254483
ENSDARG00000076891	rfxap	ENSMUSG00000036615	Rfxap	ortholog_one2one	49.7409	41.5584	100	65.17	1	-0.460591	0.0446348	-0.196772	0.0311579	0.142568	0.120928
ENSDARG00000060639	apba2b	ENSMUSG00000030519	Apba2	ortholog_one2one	65.4262	72.6667	50	76.05	1	-0.460552	0.568089	0	1.6475e-10	0	6.1162e-11
ENSDARG00000008966	tbl1xr1b	ENSMUSG00000027630	Tbl1xr1	ortholog_one2many	93.3333	92.607	0	11.99	0	-0.459722	0.00739045	0.552705	0.000498522	0.561033	0.000384576
ENSDARG00000005026	tshz1	ENSMUSG00000046982	Tshz1	ortholog_one2one	60.4917	63.5609	25	99.16	1	-0.45777	0.00390518	1.1235	6.34315e-09	1.83844	1.73038e-13
ENSDARG00000103834	rbm14b	ENSMUSG00000006456	Rbm14	ortholog_one2many	17.446	14.4993	25	64.03	0	-0.457175	0.0177292	0.320914	0.00418178	-0.381808	0.00140173
ENSDARG00000059354	glmp	ENSMUSG00000001418	Glmp	ortholog_one2one	35.1351	35.396	25	0	0	-0.45474	0.00831012	0.26745	0.000798756	0.444839	2.09134e-06
ENSDARG00000007198	mta1	ENSMUSG00000021144	Mta1	ortholog_one2one	80.1626	70.128	0	29.59	0	-0.45453	0.114655	0.815659	5.79619e-07	1.54268	2.96295e-12
ENSDARG00000098801	sbno2a	ENSMUSG00000035673	Sbno2	ortholog_one2many	53.6501	57.7465	0	0.35	0	-0.453547	0.512914	0.416257	0.00300823	-0.125136	0.465035
ENSDARG00000020872	nfat5a	ENSMUSG00000003847	Nfat5	ortholog_one2many	43.5734	39.7552	0	6.5	0	-0.45219	0.0238658	0.602895	1.74775e-11	0.465597	2.75309e-09
ENSDARG00000020228	usf2	ENSMUSG00000058239	Usf2	ortholog_one2one	70.4268	66.763	0	74.03	1	-0.451624	0.0475672	-0.0897859	0.468576	-0.25039	0.036077
ENSDARG00000069619	atf7ip	ENSMUSG00000030213	Atf7ip	ortholog_one2one	29.6037	19.4487	0	5.85	0	-0.451487	0.0108718	0.0604482	0.263647	-0.203304	0.000393641
ENSDARG00000028386	htatip2	ENSMUSG00000039745	Htatip2	ortholog_one2one	63.9831	54.9091	100	92.28	1	-0.448355	0.585358	-0.642427	0.00311354	-0.714517	0.00125569
ENSDARG00000045131	id4	ENSMUSG00000021379	Id4	ortholog_one2one	62.6984	49.0683	0	42.54	0	-0.447796	0.334833	-0.11855	0.031383	0.0579807	0.315685
ENSDARG00000020085	slc33a1	ENSMUSG00000027822	Slc33a1	ortholog_one2one	70.4251	69.2727	100	76.2	1	-0.446186	0.372955	-0.236998	0.201338	-0.804123	0.000118826
ENSDARG00000058522	shq1	ENSMUSG00000035378	Shq1	ortholog_one2one	46.587	47.9789	100	97.88	0	-0.444922	0.0201519	-0.388835	0.0064844	-0.0761677	0.618076
ENSDARG00000000503	stx1b	ENSMUSG00000030806	Stx1b	ortholog_one2one	97.2222	97.2222	0	2.97	0	-0.443348	0.35976	0.972387	0.0016431	1.40778	7.20503e-06
ENSDARG00000078348	tcf20	ENSMUSG00000041852	Tcf20	ortholog_one2many	21.2829	25.2139	0	28.03	0	-0.442545	0.0932234	0.513675	0.0818272	0.0460878	0.996581
ENSDARG00000019188	ube2l3a	ENSMUSG00000038965	Ube2l3	ortholog_one2many	84.8837	94.8052	0	0	0	-0.440764	0.0366718	0.694067	1.66338e-07	0.389435	0.000384053
ENSDARG00000059234	mrps27	ENSMUSG00000041632	Mrps27	ortholog_one2one	50.5025	48.4337	25	3.96	0	-0.439957	0.222431	0.729709	3.9859e-09	-0.181767	0.041664
ENSDARG00000043666	abt1	ENSMUSG00000036376	Abt1	ortholog_one2one	41.3115	46.8401	0	51.57	0	-0.438469	0.305118	-0.0126064	0.946752	-0.372783	0.000154567
ENSDARG00000097253	yeats2	ENSMUSG00000041215	Yeats2	ortholog_one2many	37.9455	12.8643	75	42.98	0	-0.437809	0.635582	0.0662216	0.691812	-0.0148117	1
ENSDARG00000035521	sfrp1a	ENSMUSG00000031548	Sfrp1	ortholog_one2many	59.1216	55.7325	50	56.78	0	-0.437461	0.00262338	0.251115	4.54017e-07	1.673	1.89583e-22
ENSDARG00000079198	usp13	ENSMUSG00000056900	Usp13	ortholog_one2one	73.2558	73.4266	75	93.51	1	-0.43416	0.00410684	0	2.98302e-11	0	5.17527e-12
ENSDARG00000074804	atxn7	ENSMUSG00000021738	Atxn7	ortholog_one2one	43.9954	43.9446	75	65.57	0	-0.43214	0.174937	-0.779181	3.72492e-08	0.66326	1.80779e-08
ENSDARG00000009899	znf385a	ENSMUSG00000000552	Zfp385a	ortholog_one2one	57.5758	63.9896	0	2.74	0	-0.430729	0.105865	-4.07904	5.25769e-16	-2.38536	8.85368e-12
ENSDARG00000043905	rnf14	ENSMUSG00000060450	Rnf14	ortholog_one2many	57.0806	54.0206	0	33.77	0	-0.427352	0.0352691	-0.187634	0.00505484	-0.164883	0.011461
ENSDARG00000052747	gpatch3	ENSMUSG00000028850	Gpatch3	ortholog_one2one	41.4244	54.2857	0	69.24	0	-0.427316	0.0483412	-1.52133	1.8381e-12	-0.591159	6.56696e-06
ENSDARG00000019060	snx12	ENSMUSG00000046032	Snx12	ortholog_one2one	51.5901	85.8824	25	60.84	0	-0.427185	0.005681	0.561131	8.21809e-05	0.164937	0.202295
ENSDARG00000039266	rbm25a	ENSMUSG00000010608	Rbm25	ortholog_one2many	70.6052	29.2363	0	23.1	0	-0.426575	0.0556799	0.155617	0.0524808	0.223594	0.00674116
ENSDARG00000078355	zc3h4	ENSMUSG00000059273	Zc3h4	ortholog_one2one	47.9851	51.2351	25	33.73	0	-0.424688	0.278556	-0.458672	0.0621134	0.737974	0.000558709
ENSDARG00000035821	si:ch211-173p18.3	ENSMUSG00000042446	Zmym4	ortholog_many2many	41.0714	38.6056	50	0	0	-0.420287	0.0194222	0.643216	4.31086e-06	0.949543	5.73422e-09
ENSDARG00000074591	eda	ENSMUSG00000059327	Eda	ortholog_one2one	54.5961	50.1279	75	35.9	1	-0.418514	0.00573464	0	1.89493e-09	0	1.99618e-10
ENSDARG00000045843	apex1	ENSMUSG00000035960	Apex1	ortholog_one2one	66.7742	65.2997	25	87.8	1	-0.418487	0.0257981	0.0715307	0.887733	-0.935915	0.0220425
ENSDARG00000011312	stk3	ENSMUSG00000022329	Stk3	ortholog_one2one	87.3984	86.5191	50	48.69	0	-0.417318	0.220889	-0.472202	3.0532e-08	0.325396	6.62695e-06
ENSDARG00000051955	brms1	ENSMUSG00000080268	Brms1	ortholog_one2one	52.0295	57.3171	0	44.92	0	-0.414629	0.0211588	-0.479197	0.000394056	-0.286687	0.0236673
ENSDARG00000086670	ice2	ENSMUSG00000032235	Ice2	ortholog_one2one	28.7406	27.0243	75	0	0	-0.408216	0.0853995	0.284203	0.00369916	-0.291683	0.00475201
ENSDARG00000036073	cebpg	ENSMUSG00000056216	Cebpg	ortholog_one2one	62.5767	68	25	66.3	0	-0.406845	0.0291707	-0.386174	0.000353096	0.391662	0.000237244
ENSDARG00000056099	gtf2h5	ENSMUSG00000034345	Gtf2h5	ortholog_one2one	83.0986	83.0986	25	91.91	1	-0.40569	0.0495943	0.386319	1.57062e-07	0.282663	1.59355e-05
ENSDARG00000033437	rps6ka1	ENSMUSG00000003644	Rps6ka1	ortholog_one2one	83.4437	85.7143	0	51.39	0	-0.405421	0.249421	1.76002	2.53646e-16	1.48741	1.01688e-14
ENSDARG00000015315	psmc5	ENSMUSG00000020708	Psmc5	ortholog_one2one	98.0296	98.0296	0	98.19	1	-0.405355	0.100203	-1.00419	9.76202e-19	-0.57471	8.32114e-14
ENSDARG00000010400	lrrfip2	ENSMUSG00000032497	Lrrfip2	ortholog_one2one	78.0247	76.1446	25	68.34	0	-0.404552	0.029342	0.971037	9.22983e-11	1.18929	1.96329e-12
ENSDARG00000058284	CT990561.1	ENSMUSG00000029245	Epha5	ortholog_one2one	77.2496	51.9406	0	13.5	0	-0.404149	0.00826379	0	5.18668e-07	0	6.09521e-10
ENSDARG00000037894	ezh1	ENSMUSG00000006920	Ezh1	ortholog_one2one	64.3799	65.0667	50	23.9	0	-0.402614	0.00851772	0.679306	4.19358e-11	0.220706	0.000780283
ENSDARG00000035043	pfdn5	ENSMUSG00000001289	Pfdn5	ortholog_one2one	79.085	78.5714	25	15.13	0	-0.402605	0.00272383	0.302356	1.00189e-05	0.150462	0.0108116
ENSDARG00000055106	znf148	ENSMUSG00000022811	Zfp148	ortholog_one2one	59.1584	60.2015	100	91.81	1	-0.401877	0.258665	-0.061395	0.506921	0.54296	3.07447e-07
ENSDARG00000021539	ephb2b	ENSMUSG00000028664	Ephb2	ortholog_one2many	87.7654	87.9433	0	0.49	0	-0.39776	0.568089	0	9.93516e-07	0	0.351038
ENSDARG00000103824	hint1	ENSMUSG00000020267	Hint1	ortholog_one2one	74.6032	74.6032	0	99.24	1	-0.395883	0.0104016	0.584974	1.298e-05	0.292263	0.0115095
ENSDARG00000033928	ndfip2	ENSMUSG00000053253	Ndfip2	ortholog_one2one	70.0422	49.1124	25	5.9	0	-0.395679	0.112734	-0.468838	5.98855e-07	-0.11224	0.123588
ENSDARG00000058993	rock1	ENSMUSG00000024290	Rock1	ortholog_one2one	75.4592	75.8493	0	95.13	1	-0.393437	0.0108263	0.263017	0.000555009	0.347225	2.28431e-05
ENSDARG00000005128	rnaseh2b	ENSMUSG00000021932	Rnaseh2b	ortholog_one2one	48.6928	48.3766	50	37.45	0	-0.393413	0.0426805	-0.529464	0.00439342	-0.55766	0.00309635
ENSDARG00000018382	prkcha	ENSMUSG00000021108	Prkch	ortholog_one2many	61.5385	60.9078	75	41.44	1	-0.393267	0.490311	2.53971	7.71214e-16	1.53859	4.16005e-10
ENSDARG00000075083	prkdc	ENSMUSG00000022672	Prkdc	ortholog_one2one	54.0908	53.9729	0	37.59	0	-0.392317	0.37995	0.194494	0.046035	0.783178	1.85924e-09
ENSDARG00000030213	sap30l	ENSMUSG00000020519	Sap30l	ortholog_one2one	85.3933	83.5165	50	61.86	0	-0.390838	0.0754397	0.662888	9.34944e-07	0.760172	1.08409e-07
ENSDARG00000074726	nrde2	ENSMUSG00000021179	Nrde2	ortholog_one2one	48.2251	47.5256	0	40.72	0	-0.39027	0.0938207	0.565212	1.38801e-05	0.619936	4.18669e-06
ENSDARG00000078658	supt20	ENSMUSG00000027751	Supt20	ortholog_one2one	43.5464	67.9849	50	8.89	0	-0.389996	0.151999	-0.615746	1.03749e-06	-0.616248	1.07733e-06
ENSDARG00000055639	ruvbl2	ENSMUSG00000003868	Ruvbl2	ortholog_one2one	88.1209	88.1209	0	48.84	0	-0.388374	0.0581426	0.623574	3.66939e-05	0.865041	3.5647e-07
ENSDARG00000038005	med25	ENSMUSG00000038502	Ptov1	ortholog_one2many	20.2568	34.1346	25	5.93	0	-0.386111	0.0713175	0.143065	0.011896	-0.332056	1.66614e-06
ENSDARG00000017762	srrt	ENSMUSG00000037364	Srrt	ortholog_one2one	69.308	70.9714	0	91.99	1	-0.385596	0.0405508	0.281001	0.0131698	-0.251784	0.0291789
ENSDARG00000087327	cbx8a	ENSMUSG00000025578	Cbx8	ortholog_one2many	43.7673	43.6464	50	1.95	0	-0.384998	0.0931744	-0.237043	0.027341	-0.285382	0.0092808
ENSDARG00000079725	dhx9	ENSMUSG00000042699	Dhx9	ortholog_one2one	77.026	70.7881	50	97.07	1	-0.383865	0.419705	-1.48984	2.58583e-09	0.874662	5.12617e-08
ENSDARG00000002591	ruvbl1	ENSMUSG00000030079	Ruvbl1	ortholog_one2one	92.3246	92.3246	25	100	1	-0.383407	0.210527	0.300212	0.00657607	-0.652829	1.30953e-06
ENSDARG00000044062	ctbp2a	ENSMUSG00000030970	Ctbp2	ortholog_one2one	63.0986	45.3441	50	33.04	0	-0.380674	0.00184749	-0.942534	1.19183e-14	-0.696915	3.97789e-12
ENSDARG00000070786	znf770	ENSMUSG00000055341	Zfp457	ortholog_one2many	11.1848	20.8655	50	0	0	-0.380223	0.467635	0.385238	0.334127	0	0.000424973
ENSDARG00000101744	hug	ENSMUSG00000040028	Elavl1	ortholog_one2many	83.2298	82.2086	0	19.42	0	-0.379807	0.000363601	-0.151885	0.0293077	-0.122781	0.0814691
ENSDARG00000015902	stat6	ENSMUSG00000002147	Stat6	ortholog_one2one	35.2332	32.497	0	5.33	0	-0.376605	0.296125	0.943525	2.75933e-13	1.49283	3.86409e-17
ENSDARG00000045092	cdk5rap3	ENSMUSG00000018669	Cdk5rap3	ortholog_one2one	62.5247	63.0219	50	62.26	0	-0.376475	0.0954644	1.29742	2.33139e-13	0.652466	8.48627e-08
ENSDARG00000006514	her6	ENSMUSG00000022528	Hes1	ortholog_one2one	79.2593	75.8865	50	54.1	0	-0.3762	0.316789	-0.374367	0.00159756	0.0972374	0.412384
ENSDARG00000104242	dcp2	ENSMUSG00000024472	Dcp2	ortholog_one2one	70.529	66.3507	0	4.64	0	-0.374975	0.0974315	0.207028	0.239992	0.513595	0.00264918
ENSDARG00000011488	sirt2	ENSMUSG00000015149	Sirt2	ortholog_one2one	62.0053	60.4113	0	70.48	0	-0.373332	0.0783073	1.22492	3.86174e-15	1.06814	7.45721e-14
ENSDARG00000043210	nfic	ENSMUSG00000055053	Nfic	ortholog_one2one	65.8491	79.4989	0	22.93	0	-0.372644	0.0654614	0.10768	0.210169	0.492301	2.10863e-06
ENSDARG00000010238	rbm22	ENSMUSG00000024604	Rbm22	ortholog_one2one	84.4706	85.4762	25	55.29	0	-0.372314	0.028792	-0.38018	1.43785e-05	-0.160188	0.0298771
ENSDARG00000007863	tra2a	ENSMUSG00000029817	Tra2a	ortholog_one2one	80.4714	84.7518	100	40.21	1	-0.371854	0.00677594	-0.423017	0.00628057	0.0833848	0.574235
ENSDARG00000001549	sp3a	ENSMUSG00000027109	Sp3	ortholog_one2many	56.3945	46.7433	75	30.97	1	-0.369757	0.089459	0.237962	0.0114285	0.172128	0.0652888
ENSDARG00000070922	cnbpb	ENSMUSG00000030057	Cnbp	ortholog_many2many	74.2331	67.9775	25	100	1	-0.369039	0.116886	0.232867	0.00112607	0.209609	0.00287462
ENSDARG00000026664	uri1	ENSMUSG00000030421	Uri1	ortholog_one2one	52.3438	50.4708	0	43.15	0	-0.368201	0.018783	0.242277	8.42958e-05	0.161491	0.00452483
ENSDARG00000099445	cc2d1b	ENSMUSG00000028582	Cc2d1b	ortholog_one2one	49.884	50.7075	25	57.72	0	-0.36807	0.0660753	1.59799	2.28489e-13	0.925419	1.29711e-08
ENSDARG00000009418	mef2cb	ENSMUSG00000005583	Mef2c	ortholog_one2one	78.9474	79.1139	100	77.99	1	-0.36687	0.0320165	0	8.34741e-09	0	1.80416e-08
ENSDARG00000034146	ccnk	ENSMUSG00000021258	Ccnk	ortholog_one2one	75.2852	68.0412	0	84.74	1	-0.365251	0.277999	-0.264624	0.387765	0.545957	0.0393374
ENSDARG00000063050	rc3h2	ENSMUSG00000075376	Rc3h2	ortholog_one2one	57.393	49.7051	0	66.65	0	-0.365086	0.327012	-0.780051	1.77053e-07	-0.0342154	0.808642
ENSDARG00000063003	alkbh5	ENSMUSG00000042650	Alkbh5	ortholog_one2one	73.8636	65.8228	25	77.76	1	-0.36491	0.406244	-0.645548	1.97983e-07	-0.166707	0.0789896
ENSDARG00000003207	mterf3	ENSMUSG00000021519	Mterf3	ortholog_one2one	47.5124	46.3592	25	8.29	0	-0.362719	0.426553	-0.684737	5.52406e-11	-0.940667	1.93177e-13
ENSDARG00000103118	cib1	ENSMUSG00000030538	Cib1	ortholog_one2many	74.4681	73.2984	0	8.82	0	-0.362039	0.0485533	0.13048	0.0182477	0.13877	0.0132631
ENSDARG00000076928	tet2	ENSMUSG00000040943	Tet2	ortholog_one2one	32.1866	28.75	75	22.84	0	-0.359843	0.472386	0.095203	0.424063	1.34747	2.635e-13
ENSDARG00000036764	hax1	ENSMUSG00000027944	Hax1	ortholog_one2one	39.1608	40	0	0	0	-0.357455	0.0087615	0.733278	6.0305e-10	0.0983837	0.201738
ENSDARG00000056801	sufu	ENSMUSG00000025231	Sufu	ortholog_one2one	81.2371	81.2371	50	100	1	-0.356826	0.0797498	0.778737	1.28898e-06	0.325482	0.0171741
ENSDARG00000021985	ercc2	ENSMUSG00000030400	Ercc2	ortholog_one2one	83.4211	83.4211	50	51.28	0	-0.356104	0.0621332	0.0240665	1	1.02139	0.130831
ENSDARG00000004046	phf6	ENSMUSG00000025626	Phf6	ortholog_one2one	69.9725	69.7802	100	80.85	1	-0.355085	0.124808	-0.266311	4.8303e-06	-0.671022	1.27044e-12
ENSDARG00000039910	rbm42	ENSMUSG00000036733	Rbm42	ortholog_one2one	57.4627	48.3264	50	3.86	0	-0.354978	0.303257	0.0575527	0.705832	0.294987	0.0228899
ENSDARG00000038559	h1f0	ENSMUSG00000096210	H1f0	ortholog_one2one	55.7789	57.2165	0	100	1	-0.354721	0.323841	0.660614	2.82355e-07	0.889864	2.12238e-09
ENSDARG00000017929	ncoa2	ENSMUSG00000005886	Ncoa2	ortholog_one2one	59.0033	60.7387	50	97.36	1	-0.34915	0.368419	0.336719	0.00484707	0.531769	3.99554e-05
ENSDARG00000042642	wtap	ENSMUSG00000060475	Wtap	ortholog_one2one	69.5035	74.2424	75	86.26	1	-0.347018	0.0173677	-0.273658	0.000102097	-0.094939	0.127112
ENSDARG00000038585	eif4e2	ENSMUSG00000026254	Eif4e2	ortholog_one2one	86.4407	83.2653	0	50.11	0	-0.346949	0.00721034	0.111231	0.374687	0.272779	0.0235042
ENSDARG00000076966	pagr1	ENSMUSG00000030680	Pagr1a	ortholog_one2many	39.9267	43.083	50	62.79	0	-0.346779	0.503697	-0.374058	0.845971	-0.186624	0.993031
ENSDARG00000020467	safb	ENSMUSG00000042625	Safb2	ortholog_one2many	41.1696	35.5197	25	45.33	0	-0.344335	0.150312	0.235898	0.00579993	-0.25226	0.00469977
ENSDARG00000055115	dtnbp1a	ENSMUSG00000057531	Dtnbp1	ortholog_one2one	60.221	61.9318	75	23.97	1	-0.341889	0.0197494	-0.387258	8.23283e-07	0.147789	0.0188099
ENSDARG00000061314	ngrn	ENSMUSG00000047084	Ngrn	ortholog_one2one	30.4498	30.0341	0	0	0	-0.334814	0.0913438	-0.237833	0.00349097	-0.610791	2.65427e-08
ENSDARG00000016260	fxr2	ENSMUSG00000018765	Fxr2	ortholog_one2one	65.3846	65.5786	0	18.81	0	-0.328439	0.165133	0.0488537	0.325754	-0.181363	0.000576502
ENSDARG00000024276	pcbp4	ENSMUSG00000023495	Pcbp4	ortholog_one2one	54.9569	63.2754	0	0	0	-0.328054	0.354295	1.45984	7.82047e-19	1.01984	1.63616e-15
ENSDARG00000076501	asxl2	ENSMUSG00000037486	Asxl2	ortholog_one2one	40.2147	35.5474	75	68.78	0	-0.327726	0.594619	-0.370312	0.000206896	-0.570944	1.26713e-06
ENSDARG00000013434	hira	ENSMUSG00000022702	Hira	ortholog_one2one	69.3069	68.9655	0	81.18	1	-0.326441	0.0852984	-1.6199	3.16053e-07	-0.18993	0.318862
ENSDARG00000044669	hp1bp3	ENSMUSG00000028759	Hp1bp3	ortholog_one2one	35.2254	38.0866	50	35.64	0	-0.324632	0.351594	0.255956	3.42272e-05	0.481482	1.94562e-09
ENSDARG00000086173	relb	ENSMUSG00000002983	Relb	ortholog_one2one	34.5361	36.0215	25	10.76	0	-0.323948	0.128712	0.265402	0.150486	-0.125318	0.579565
ENSDARG00000088246	thoc1	ENSMUSG00000024287	Thoc1	ortholog_one2one	73.4351	73.2116	50	89.1	1	-0.321285	0.234483	-0.284695	9.45899e-05	-0.497035	4.33935e-08
ENSDARG00000056128	fastkd1	ENSMUSG00000027086	Fastkd1	ortholog_one2one	42.9772	43.1846	75	74.51	0	-0.318968	0.0367483	0	0.21725	0	8.89602e-06
ENSDARG00000042087	dmap1	ENSMUSG00000009640	Dmap1	ortholog_one2one	79.0948	78.4188	25	16.31	0	-0.316336	0.139703	0.0246724	0.720375	-0.3869	4.71978e-07
ENSDARG00000063145	tfam	ENSMUSG00000003923	Tfam	ortholog_one2one	34.296	39.0947	100	7.31	0	-0.314529	0.102684	0.732654	6.14292e-09	0.0705162	0.481435
ENSDARG00000079626	elf2b	ENSMUSG00000037174	Elf2	ortholog_one2many	56.6722	58.0101	50	24.49	0	-0.307467	0.0913208	0.386897	0.00548192	0.735271	2.93631e-06
ENSDARG00000091079	MALSU1	ENSMUSG00000029815	Malsu1	ortholog_one2one	37.2727	35.9649	0	42.58	0	-0.30556	0.0595213	-0.0569665	0.459112	-0.262492	0.00115932
ENSDARG00000056367	mpv17l2	ENSMUSG00000035559	Mpv17l2	ortholog_one2one	51.7588	51.5	75	84.09	1	-0.305503	0.708551	-0.28895	0.000178577	0.223237	0.0022836
ENSDARG00000029472	mllt4a	ENSMUSG00000068036	Afdn	ortholog_one2one	68.8259	74.7253	25	17.62	0	-0.304781	0.0524334	-1.0983	9.15835e-15	-0.180121	0.0041805
ENSDARG00000063535	chd4a	ENSMUSG00000063870	Chd4	ortholog_one2many	75.32	76.8146	0	0.29	0	-0.303291	0.143614	-0.602774	2.7764e-08	-0.0569248	0.491494
ENSDARG00000054201	rnf40	ENSMUSG00000030816	Rnf40	ortholog_one2one	65.3465	65.9341	50	77.27	1	-0.302905	0.0808909	0.0930502	0.248882	-0.0235955	0.821337
ENSDARG00000021466	ireb2	ENSMUSG00000032293	Ireb2	ortholog_one2one	64.4764	65.2129	0	8.32	0	-0.297541	0.481107	-0.644475	8.97166e-05	-0.693489	3.84386e-05
ENSDARG00000091563	snw1	ENSMUSG00000021039	Snw1	ortholog_one2one	62.5448	65.1119	0	50.5	0	-0.297006	0.474818	-0.33263	1.19818e-06	-0.151876	0.00669547
ENSDARG00000054301	kti12	ENSMUSG00000073775	Kti12	ortholog_one2one	53.4545	41.8803	0	0	0	-0.29541	0.227089	-0.367194	0.0951638	-0.595618	0.0126171
ENSDARG00000008370	csnk1da	ENSMUSG00000025162	Csnk1d	ortholog_one2many	92.9095	91.5663	25	4.58	0	-0.295137	0.0328	0.991992	3.89068e-15	0.444731	1.57283e-08
ENSDARG00000004587	kat5a	ENSMUSG00000024926	Kat5	ortholog_one2many	79.1822	83.0409	0	84.3	1	-0.289229	0.00331551	0.662226	2.87477e-05	0.869754	6.5944e-07
ENSDARG00000040407	usp22	ENSMUSG00000042506	Usp22	ortholog_one2many	93.7768	83.2381	0	83.3	1	-0.288322	0.111987	0.639588	5.08324e-08	-0.597743	2.34208e-07
ENSDARG00000013031	mta2	ENSMUSG00000071646	Mta2	ortholog_one2one	80.2413	79.6407	25	94.27	1	-0.286911	0.330255	0.715462	1.4756e-13	0.293834	1.16714e-06
ENSDARG00000070795	eaf1	ENSMUSG00000021890	Eaf1	ortholog_one2one	77.4704	73.1343	0	98.92	1	-0.286277	0.0150323	0.176686	0.0525333	-0.234707	0.0124205
ENSDARG00000079015	brca2	ENSMUSG00000041147	Brca2	ortholog_one2one	24.6347	21.2676	50	19.47	0	-0.2824	0.680855	0.373706	0.0579788	0.366266	0.0675211
ENSDARG00000008224	vps35	ENSMUSG00000031696	Vps35	ortholog_one2one	90.1324	94.0955	50	6.46	0	-0.282361	0.199541	-0.300283	5.22396e-05	-0.503031	3.02528e-08
ENSDARG00000054968	cd40	ENSMUSG00000017652	Cd40	ortholog_one2one	25.1748	24.9135	0	0	0	-0.27684	0.382077	0	0.874341	0	1.2852e-16
ENSDARG00000041155	morf4l1	ENSMUSG00000062270	Morf4l1	ortholog_one2one	87.9257	78.453	0	100	1	-0.275613	0.0539721	1.30742	3.62907e-21	1.26084	1.57974e-20
ENSDARG00000068978	glo1	ENSMUSG00000024026	Glo1	ortholog_one2one	71.6667	70.1087	50	3.08	0	-0.275425	0.122291	0.463651	0.000180939	0.758295	2.46883e-07
ENSDARG00000059125	prkacbb	ENSMUSG00000005034	Prkacb	ortholog_one2many	88.604	78.1407	25	50.65	0	-0.271062	0.569118	0.691533	1.40487e-10	0.212092	0.0027583
ENSDARG00000019961	znf513a	ENSMUSG00000043059	Zfp513	ortholog_one2many	45.438	46.0259	50	33.14	0	-0.268522	0.0544595	1.40669	5.36478e-10	0.541032	0.00128049
ENSDARG00000025348	igfbp5b	ENSMUSG00000026185	Igfbp5	ortholog_one2many	46.2687	45.7565	25	92.52	1	-0.264728	0.267826	-0.063621	0.309167	-0.408451	3.33013e-07
ENSDARG00000104396	trim25	ENSMUSG00000000275	Trim25	ortholog_one2one	31.3456	32.3344	50	15.13	0	-0.259202	0.116901	2.5609	1.12433e-15	1.55584	4.21988e-10
ENSDARG00000055930	zc3h7b	ENSMUSG00000022390	Zc3h7b	ortholog_one2many	40.566	39.4094	50	50.28	0	-0.256637	0.574805	0.256017	0.387364	0.54061	0.0453634
ENSDARG00000026908	tmed2	ENSMUSG00000029390	Tmed2	ortholog_one2one	87.9808	91.0448	25	60.43	0	-0.255459	0.132101	0.0889102	0.00808671	0.273923	7.60423e-09
ENSDARG00000052178	eif2s1b	ENSMUSG00000021116	Eif2s1	ortholog_one2many	94.2857	94.2857	50	8.64	0	-0.254128	0.162257	-0.358776	0.000107831	-0.431598	1.20812e-05
ENSDARG00000001220	mycbp2	ENSMUSG00000033004	Mycbp2	ortholog_one2one	85.5706	82.4694	100	52.79	1	-0.252238	0.276962	0.280986	0.000279454	0.283205	0.000248212
ENSDARG00000103980	ets2	ENSMUSG00000022895	Ets2	ortholog_one2one	61.5034	57.6923	75	82.98	1	-0.25218	0.579794	1.01164	6.02427e-08	0.782146	3.92131e-06
ENSDARG00000090054	znf318	ENSMUSG00000015597	Zfp318	ortholog_one2one	23.9013	23.8266	0	12.23	0	-0.251521	0.128912	-0.705069	5.06219e-05	-0.862216	4.77698e-06
ENSDARG00000046081	bloc1s2	ENSMUSG00000057506	Bloc1s2	ortholog_one2one	59.887	74.1259	0	68.66	0	-0.250776	0.0799477	-0.40894	4.48478e-07	-0.526175	9.05001e-09
ENSDARG00000102195	zc3h7a	ENSMUSG00000037965	Zc3h7a	ortholog_one2one	49.6439	50.3093	50	80.86	1	-0.247218	0.158942	0.396215	4.53922e-07	0.245092	0.000273707
ENSDARG00000015824	lemd3	ENSMUSG00000048661	Lemd3	ortholog_one2one	50.1784	45.9695	75	98.49	1	-0.247022	0.334755	0.257066	0.0277244	0.617406	5.67472e-06
ENSDARG00000070903	met	ENSMUSG00000009376	Met	ortholog_one2one	51.7366	51.8492	50	66.64	0	-0.245688	0.0984761	3.20383	2.14795e-13	3.26433	1.56187e-13
ENSDARG00000037872	foxk1	ENSMUSG00000056493	Foxk1	ortholog_one2one	71.3615	63.4214	75	32.92	1	-0.243854	0.618776	-0.628732	0.0686863	-0.0805781	0.861231
ENSDARG00000075569	gpbp1l1	ENSMUSG00000034042	Gpbp1l1	ortholog_one2one	57.3499	58.5624	100	80.66	1	-0.242383	0.686091	0.402661	0.00785037	0.918582	4.82259e-07
ENSDARG00000009594	nr1d2b	ENSMUSG00000021775	Nr1d2	ortholog_one2many	60.2076	60.4167	75	3.56	1	-0.239578	0.0656743	-0.282808	0.0535693	-0.109676	0.485502
ENSDARG00000021046	rhbdd1	ENSMUSG00000026142	Rhbdd1	ortholog_one2one	52.8358	56.1905	75	59.69	1	-0.238628	0.148792	-0.500332	8.64335e-07	0.627157	2.05411e-08
ENSDARG00000018494	smn1	ENSMUSG00000021645	Smn1	ortholog_one2one	52.3132	51.0417	0	37.6	0	-0.23841	0.339396	0.40159	0.0164579	0.0953385	0.654361
ENSDARG00000028699	crkl	ENSMUSG00000006134	Crkl	ortholog_one2one	81.9672	82.5082	0	94.18	1	-0.238015	0.361818	-0.580787	4.58265e-11	-0.368366	1.24327e-07
ENSDARG00000024317	trap1	ENSMUSG00000005981	Trap1	ortholog_one2one	67.3913	74.6459	0	41.79	0	-0.23753	0.418438	0.892439	1.01016e-08	-0.479837	0.000106809
ENSDARG00000029783	dedd	ENSMUSG00000013973	Dedd	ortholog_one2one	57.9208	73.5849	0	46.36	0	-0.236046	0.105284	-0.677261	8.60503e-06	-0.396983	0.0022868
ENSDARG00000017244	chd6	ENSMUSG00000057133	Chd6	ortholog_one2one	53.0329	57.7278	0	5.18	0	-0.235488	0.330448	0.580248	1.41501e-09	0.861061	5.4447e-13
ENSDARG00000105142	tcirg1b	ENSMUSG00000001750	Tcirg1	ortholog_one2many	56.2728	55.3957	0	80.67	1	-0.235137	0.369551	1.0092	2.26765e-07	1.27638	3.94773e-09
ENSDARG00000017841	cand1	ENSMUSG00000020114	Cand1	ortholog_one2one	93.9024	93.9024	50	69.78	0	-0.231882	0.267633	0.112749	0.185535	0.127891	0.134027
ENSDARG00000056407	irf8	ENSMUSG00000041515	Irf8	ortholog_one2one	54.3735	54.2453	100	44.56	1	-0.229482	0.989531	0	1.94825e-11	0	7.86643e-07
ENSDARG00000000966	ncor2	ENSMUSG00000029478	Ncor2	ortholog_one2one	52.7125	50	50	16.72	0	-0.22764	0.178187	0.697442	0.00108853	-0.0896175	0.782175
ENSDARG00000074301	cth	ENSMUSG00000028179	Cth	ortholog_one2many	72.5247	73.6181	50	100	1	-0.224853	0.632248	2.04764	2.94519e-06	0.412095	0.45867
ENSDARG00000062553	bach1a	ENSMUSG00000025612	Bach1	ortholog_one2many	30.1775	27.6049	0	3.97	0	-0.224787	0.503148	0	0.149079	1.55496	0.00046428
ENSDARG00000026723	syncripl	ENSMUSG00000032423	Syncrip	ortholog_one2many	77.057	78.1701	0	0.7	0	-0.223362	0.581262	-0.325977	0.00110983	-0.6016	1.03162e-06
ENSDARG00000102964	axin1	ENSMUSG00000024182	Axin1	ortholog_one2one	66.5868	64.0553	0	59.13	0	-0.217387	0.104137	0.459519	1.3908e-06	-0.319158	0.000173874
ENSDARG00000070704	thap7	ENSMUSG00000022760	Thap7	ortholog_one2one	19.4577	39.4822	0	100	0	-0.216785	0.0852762	-0.33718	7.58244e-05	-0.164935	0.0289709
ENSDARG00000016513	setd3	ENSMUSG00000056770	Setd3	ortholog_one2one	71.1893	71.5488	75	88.2	1	-0.215159	0.610697	0.100053	0.0533166	0.0049825	1
ENSDARG00000091127	klf15	ENSMUSG00000030087	Klf15	ortholog_one2one	53.3937	56.8675	25	46.66	0	-0.214823	0.590227	2.31055	2.73616e-13	1.84629	2.65122e-11
ENSDARG00000042637	tert	ENSMUSG00000021611	Tert	ortholog_one2one	31.0565	30.3922	50	17.07	0	-0.211504	0.706215	2.68642	3.56125e-08	0	0.0722549
ENSDARG00000045692	pphln1	ENSMUSG00000036167	Pphln1	ortholog_many2many	33.7017	32.021	0	17.45	0	-0.20913	0.419669	-1.19589	1.97037e-12	-1.21737	1.93642e-12
ENSDARG00000036096	smad3a	ENSMUSG00000032402	Smad3	ortholog_one2many	93.617	93.1765	50	0	0	-0.208792	0.616698	-0.0761073	0.681331	0.201373	0.14751
ENSDARG00000019791	prmt3	ENSMUSG00000030505	Prmt3	ortholog_one2one	60.3516	58.5227	75	59.92	1	-0.20418	0.280133	-0.934138	2.87804e-10	-0.92824	3.53427e-10
ENSDARG00000079949	supt16h	ENSMUSG00000035726	Supt16	ortholog_one2one	83.4623	82.426	25	92.9	1	-0.203949	0.42369	-0.308213	0.0242992	-0.51298	0.000512934
ENSDARG00000026842	acin1b	ENSMUSG00000022185	Acin1	ortholog_one2many	55.2448	23.6173	0	17.22	0	-0.203624	0.553417	0.374238	0.0194083	0.281232	0.0788956
ENSDARG00000016871	smarce1	ENSMUSG00000037935	Smarce1	ortholog_one2one	73.3491	75.6691	0	39.95	0	-0.202284	0.205775	0.554716	3.98071e-06	0.613156	9.36287e-07
ENSDARG00000035819	sirt3	ENSMUSG00000025486	Sirt3	ortholog_one2one	49.5798	68.8716	0	39.41	0	-0.202083	0.660787	0.152073	0.0137742	-0.198516	0.00174374
ENSDARG00000014994	tbp	ENSMUSG00000014767	Tbp	ortholog_one2one	90.3974	86.3924	25	50.84	0	-0.198449	0.40959	0.139588	0.0700198	0.0970307	0.192798
ENSDARG00000079741	CABZ01075131.1	ENSMUSG00000044647	Csrnp3	ortholog_one2one	33.7875	20.7705	50	74.78	0	-0.1983	0.13101	0	0.79128	0	0.948759
ENSDARG00000012591	pdcd10b	ENSMUSG00000027835	Pdcd10	ortholog_one2many	93.3333	92.4528	25	90.08	1	-0.195098	0.0958931	-0.243253	0.00132612	0.0698515	0.371126
ENSDARG00000042644	sod2	ENSMUSG00000006818	Sod2	ortholog_one2one	80.3571	81.0811	50	96.17	1	-0.193462	0.298246	0.841871	1.41574e-13	0.131204	0.0226413
ENSDARG00000077964	limd1a	ENSMUSG00000025239	Limd1	ortholog_one2one	51.2868	41.7665	0	29.55	0	-0.192288	0.323623	-0.147926	0.0477574	-0.0421614	0.607494
ENSDARG00000010831	churc1	ENSMUSG00000090258	Churc1	ortholog_one2one	65.1786	65.1786	0	17.43	0	-0.191522	0.10479	0.332738	5.68515e-05	-0.184903	0.012669
ENSDARG00000060633	usp16	ENSMUSG00000025616	Usp16	ortholog_one2one	46.135	45.5758	0	3.69	0	-0.190492	0.735075	-0.848324	1.95245e-10	-0.414669	1.25376e-05
ENSDARG00000023814	dyrk1ab	ENSMUSG00000022897	Dyrk1a	ortholog_one2many	81.9539	79.1612	0	99.37	1	-0.189657	0.447668	0.521395	4.14425e-06	0.565424	1.28377e-06
ENSDARG00000038025	cbx7a	ENSMUSG00000053411	Cbx7	ortholog_one2many	39.749	60.1266	0	19.74	0	-0.188173	0.421841	0.153899	0.044633	-0.275848	0.000884616
ENSDARG00000042045	hmg20b	ENSMUSG00000020232	Hmg20b	ortholog_one2one	58.804	55.836	0	39.47	0	-0.187425	0.400935	-0.257238	0.12558	-0.0487265	0.870452
ENSDARG00000001940	dnajc1	ENSMUSG00000026740	Dnajc1	ortholog_one2one	58.7452	55.9783	25	45.47	0	-0.183436	0.23295	0.173036	0.072207	0.490644	1.05798e-05
ENSDARG00000020057	bmpr2b	ENSMUSG00000067336	Bmpr2	ortholog_one2many	49.8519	48.6513	25	81.64	1	-0.182734	0.510284	-0.486797	0.000638453	-0.560735	0.000168389
ENSDARG00000063194	lin54	ENSMUSG00000035310	Lin54	ortholog_one2one	58.6252	60.3471	50	4.34	0	-0.180867	0.456351	-1.42855	2.41281e-12	-0.484932	3.36735e-05
ENSDARG00000008141	rbl1	ENSMUSG00000027641	Rbl1	ortholog_one2one	58.7273	60.7714	0	71.42	0	-0.180025	0.684179	1.031	0.00106375	0.83745	0.0084694
ENSDARG00000021991	erlin1	ENSMUSG00000025198	Erlin1	ortholog_one2one	76.6082	75.2874	0	100	1	-0.176894	0.42347	-0.117833	0.0942122	-0.254674	0.00115826
ENSDARG00000076590	atad2	ENSMUSG00000022360	Atad2	ortholog_one2one	53.5688	53.3724	0	12.55	0	-0.175918	0.418274	-0.666017	0.0436163	1.24188	4.73601e-06
ENSDARG00000008032	sart3	ENSMUSG00000018974	Sart3	ortholog_one2one	59.9369	59.2516	100	87.74	1	-0.17585	0.342349	0.520242	1.27487e-08	0.295277	6.19857e-05
ENSDARG00000007614	wwox	ENSMUSG00000004637	Wwox	ortholog_one2one	72.4928	61.1111	25	56.61	0	-0.174029	0.687742	0.501111	1.20828e-06	0.089858	0.284307
ENSDARG00000042725	cebpb	ENSMUSG00000056501	Cebpb	ortholog_one2one	35	33.1081	0	94.34	0	-0.171422	0.474818	1.71557	7.86881e-12	0.846619	2.12996e-06
ENSDARG00000060392	ash2l	ENSMUSG00000031575	Ash2l	ortholog_one2one	80.678	76.4045	0	59.18	0	-0.171178	0.640718	0.660189	3.92046e-10	0.224839	0.00161996
ENSDARG00000002385	atm	ENSMUSG00000034218	Atm	ortholog_one2one	52.9602	53.392	0	57.75	0	-0.169925	0.899148	-0.698443	0.0126118	0.65017	0.00179656
ENSDARG00000005236	srcap	ENSMUSG00000107023	Gm42715	ortholog_one2many	32.6525	41.3247	50	37.6	0	-0.16932	0.538205	-0.997958	0.163198	-0.130959	0.761775
ENSDARG00000057987	uba3	ENSMUSG00000030061	Uba3	ortholog_one2one	86.5801	86.5801	50	81.42	1	-0.161825	0.194306	-0.59947	7.21058e-09	-1.12035	9.69531e-14
ENSDARG00000007207	cnpy2	ENSMUSG00000025381	Cnpy2	ortholog_one2one	63.587	64.2857	0	8.29	0	-0.158285	0.582743	0.505871	2.90274e-12	0.391479	3.60176e-10
ENSDARG00000078042	il10rb	ENSMUSG00000022967	Ifnar1	ortholog_one2one	18.8011	11.6949	0	0	0	-0.153027	0.791142	1.07006	6.08933e-14	0.385517	5.92683e-06
ENSDARG00000017525	ccnt1	ENSMUSG00000011960	Ccnt1	ortholog_one2one	58.7537	54.6961	0	82.99	1	-0.150099	0.500308	-0.0150382	0.968127	0.721669	7.38035e-08
ENSDARG00000039850	dusp22b	ENSMUSG00000042662	Dusp15	ortholog_one2one	52.459	40.8511	0	30.66	0	-0.148983	0.310627	1.21912	0.00174695	1.78704	3.71304e-06
ENSDARG00000062420	nfia	ENSMUSG00000028565	Nfia	ortholog_one2one	87.9771	90.5697	50	43.21	0	-0.148383	0.592329	-0.242406	0.00785733	0.739697	2.49142e-09
ENSDARG00000019339	uxt	ENSMUSG00000001134	Uxt	ortholog_one2one	58.0645	57.3248	25	40	0	-0.1469	0.638713	-0.635999	2.03988e-06	-0.475073	9.77595e-05
ENSDARG00000035330	taf1	ENSMUSG00000031314	Taf1	ortholog_one2one	76.2712	78.4469	0	50.38	0	-0.145081	0.41286	-0.306584	5.0035e-05	0.171005	0.00825595
ENSDARG00000030583	foxk2	ENSMUSG00000039275	Foxk2	ortholog_one2many	74.8162	62.5192	0	53.15	0	-0.145029	0.274011	0.261048	0.0485542	-0.00820539	1
ENSDARG00000016782	huwe1	ENSMUSG00000025261	Huwe1	ortholog_one2one	77.8274	79.534	25	89.63	1	-0.145005	0.446024	0.0428108	0.663358	0.482295	1.43052e-06
ENSDARG00000078574	SENP1	ENSMUSG00000033075	Senp1	ortholog_one2one	41.4266	47.1875	0	7.36	0	-0.142899	0.474539	-0.0420035	0.564489	-0.145806	0.0289187
ENSDARG00000098231	CABZ01079847.1	ENSMUSG00000024986	Hhex	ortholog_one2one	68.5393	45.0185	0	55.84	0	-0.142512	0.940722	0	0.780877	0	4.53846e-08
ENSDARG00000015221	nsrp1	ENSMUSG00000037958	Nsrp1	ortholog_one2one	43.0233	40.9594	50	7.34	0	-0.136407	0.230789	-0.373484	0.00146241	0.0149466	0.983326
ENSDARG00000069386	mtg1	ENSMUSG00000039018	Mtg1	ortholog_one2one	60.9244	44.4785	0	48.36	0	-0.135651	0.778184	-1.27898	1.31093e-15	-1.01502	1.38798e-13
ENSDARG00000026767	nol11	ENSMUSG00000018433	Nol11	ortholog_one2one	38.1356	37.3444	0	0	0	-0.134837	0.718793	0.0605265	0.716507	-0.459951	0.001286
ENSDARG00000060054	epc1b	ENSMUSG00000024240	Epc1	ortholog_one2many	64.4005	64.0836	25	39.1	0	-0.132616	0.643477	-1.68472	4.32233e-13	-0.424406	0.000260531
ENSDARG00000042291	dlx6a	ENSMUSG00000029754	Dlx6	ortholog_one2one	82.9959	69.0236	75	93.33	1	-0.131588	0.335007	0	1	0	1
ENSDARG00000005560	ywhah	ENSMUSG00000018965	Ywhah	ortholog_one2one	84.5528	84.5528	50	56.04	0	-0.128686	0.250672	0.647611	1.53592e-05	0.112914	0.400406
ENSDARG00000045064	ablim1b	ENSMUSG00000025085	Ablim1	ortholog_one2many	80.791	33.2172	75	20.79	1	-0.128186	0.496297	3.55615	1.01737e-22	1.97176	1.81338e-16
ENSDARG00000031203	commd1	ENSMUSG00000051355	Commd1	ortholog_one2many	50.7937	51.0638	0	25.44	0	-0.127112	0.543124	0.490421	1.95254e-07	0.0842605	0.255817
ENSDARG00000042215	pias4b	ENSMUSG00000004934	Pias4	ortholog_one2many	57.874	57.9882	25	0	0	-0.123835	0.391406	-0.575831	8.01805e-08	-0.217435	0.00657181
ENSDARG00000015747	aarsd1	ENSMUSG00000075528	Aarsd1	ortholog_one2one	63.1961	63.3495	50	100	1	-0.122214	0.723332	-0.14257	0.898187	-0.659039	0.129853
ENSDARG00000103672	cirbpa	ENSMUSG00000031167	Rbm3	ortholog_many2many	44.8649	53.8961	0	68.62	0	-0.118131	0.383371	-1.04702	3.2401e-06	-1.0173	5.08242e-06
ENSDARG00000008697	epas1a	ENSMUSG00000024140	Epas1	ortholog_one2many	57.284	53.0892	25	10.39	0	-0.115919	0.709744	0.308834	0.191768	1.95079	4.54555e-11
ENSDARG00000090697	eif3ea	ENSMUSG00000022336	Eif3e	ortholog_one2many	93.0493	93.2584	75	19.62	1	-0.112378	0.660371	0.971462	1.10374e-13	-0.0894222	0.16208
ENSDARG00000039150	lgmn	ENSMUSG00000021190	Lgmn	ortholog_one2one	63.6986	64.1379	0	67.34	0	-0.111097	0.832044	-1.68108	1.06517e-20	-0.835997	1.48227e-14
ENSDARG00000078214	mybbp1a	ENSMUSG00000040463	Mybbp1a	ortholog_one2one	39.6361	37.2768	0	34.48	0	-0.110045	0.842575	0.33517	0.0153312	0.078523	0.627256
ENSDARG00000105172	rnf168	ENSMUSG00000014074	Rnf168	ortholog_one2one	32.2785	26.9841	50	34.22	0	-0.109826	0.830472	0.719123	8.53241e-07	1.43095	1.42111e-12
ENSDARG00000098228	thrap3b	ENSMUSG00000043962	Thrap3	ortholog_one2many	41.2456	36.9085	75	1.21	0	-0.108617	0.772056	-0.138571	0.191482	0.460028	7.6957e-05
ENSDARG00000103957	aamdc	ENSMUSG00000035642	Aamdc	ortholog_one2one	75.4098	61.3333	100	72.33	1	-0.107658	0.714472	0.90221	7.63958e-12	0.17963	0.0178972
ENSDARG00000058220	tada3l	ENSMUSG00000048930	Tada3	ortholog_one2one	79.021	78.4722	25	98.51	1	-0.107622	0.71943	-0.583905	1.70201e-07	-0.532998	7.31269e-07
ENSDARG00000018460	mbnl2	ENSMUSG00000022139	Mbnl2	ortholog_one2one	82.5065	84.7185	100	91.04	1	-0.107072	0.467635	1.1427	4.00976e-17	1.05902	2.88515e-16
ENSDARG00000094300	NUPR2	ENSMUSG00000095789	Nupr1l	ortholog_one2one	42.1053	31.3725	0	0	0	-0.105647	0.799182	0.696027	5.00569e-07	0.422442	0.000444993
ENSDARG00000041575	trmt10c	ENSMUSG00000044763	Trmt10c	ortholog_one2one	40.9429	39.8551	0	33.78	0	-0.10553	0.905059	-0.81925	5.13217e-06	-0.53595	0.000727356
ENSDARG00000015563	LPIN3	ENSMUSG00000027412	Lpin3	ortholog_one2one	43.9549	50.5896	0	0.83	0	-0.105061	0.78325	1.38763	5.06367e-10	-1.11575	1.77422e-06
ENSDARG00000020840	mcrs1	ENSMUSG00000037570	Mcrs1	ortholog_one2one	75.2119	76.8398	0	39.21	0	-0.10167	0.630671	0.102134	0.217079	-0.389988	4.02044e-05
ENSDARG00000056621	ctcf	ENSMUSG00000005698	Ctcf	ortholog_one2one	71.9298	77.9891	50	97.72	1	-0.10132	0.787538	-0.0943138	0.169834	0.729946	1.37491e-10
ENSDARG00000099366	supt4h1	ENSMUSG00000020485	Supt4a	ortholog_one2one	86.1702	69.2308	25	90.06	1	-0.101114	0.597749	-0.587359	2.12878e-09	-0.493038	4.6394e-08
ENSDARG00000021097	nelfcd	ENSMUSG00000016253	Nelfcd	ortholog_one2one	89.4646	87.6481	50	51.87	0	-0.0981461	0.744791	-1.23664	7.92661e-20	-0.597383	1.75782e-13
ENSDARG00000052649	ube2ia	ENSMUSG00000015120	Ube2i	ortholog_one2many	98.7342	98.7342	25	87.11	1	-0.0957333	0.539368	0.528473	7.89805e-09	0.373524	2.16838e-06
ENSDARG00000061204	ddx20	ENSMUSG00000027905	Ddx20	ortholog_one2one	48.9227	46.7879	100	54.44	0	-0.0912044	0.882352	-0.606698	4.32624e-07	0.27749	0.00300609
ENSDARG00000061040	pum2	ENSMUSG00000020594	Pum2	ortholog_one2one	67.5788	76.454	0	31.54	0	-0.0883129	0.712498	-0.30344	0.108999	0.637143	0.000780471
ENSDARG00000070769	foxg1a	ENSMUSG00000020950	Foxg1	ortholog_one2many	84.5238	73.8046	50	91.37	1	-0.0876064	0.613929	1.0991	2.66325e-09	0.269482	0.0482252
ENSDARG00000040861	tcf25	ENSMUSG00000001472	Tcf25	ortholog_one2one	57.8295	55.1775	50	70.22	0	-0.0867389	0.769473	-0.539214	3.46494e-10	-0.678677	5.75021e-12
ENSDARG00000040764	id1	ENSMUSG00000042745	Id1	ortholog_one2one	52.3438	45.2703	0	90.24	1	-0.0854061	0.135309	-0.0978738	0.790263	-0.0992659	0.797679
ENSDARG00000071164	alkbh1	ENSMUSG00000079036	Alkbh1	ortholog_one2one	60.1208	51.1568	75	33.32	1	-0.0850615	0.716957	-0.657412	1.56814e-07	-0.0864243	0.363136
ENSDARG00000103095	tbk1	ENSMUSG00000020115	Tbk1	ortholog_one2one	71.1142	70.9191	0	85.33	1	-0.0845643	0.722793	-0.582071	1.47537e-10	-1.07012	2.21726e-15
ENSDARG00000075543	chd8	ENSMUSG00000053754	Chd8	ortholog_one2one	57.4902	56.7777	0	50.78	0	-0.0836094	0.86474	-0.33071	0.00709386	0.930897	4.29691e-10
ENSDARG00000102325	ehmt2	ENSMUSG00000013787	Ehmt2	ortholog_one2one	53.1277	49.0895	0	9.73	0	-0.0813001	0.771021	0.468913	1.50331e-07	0.110768	0.110719
ENSDARG00000036542	pknox1.2	ENSMUSG00000006705	Pknox1	ortholog_one2many	66.9746	66.5138	0	6.45	0	-0.0789585	0.842996	0.618496	3.3863e-05	0.637975	2.65139e-05
ENSDARG00000035066	ubtf	ENSMUSG00000020923	Ubtf	ortholog_one2many	66.6667	64.1361	50	11.3	0	-0.076755	0.568089	-0.254047	0.0167132	-0.0443087	0.744212
ENSDARG00000038996	egln1a	ENSMUSG00000031987	Egln1	ortholog_one2many	56.0345	32.5	50	20.07	0	-0.0748872	0.910713	-0.56755	3.35839e-10	-0.70035	8.57061e-12
ENSDARG00000002077	mnat1	ENSMUSG00000021103	Mnat1	ortholog_one2one	73.1392	73.1392	100	77.16	1	-0.0742213	0.783047	0.498981	7.53755e-09	0.216853	0.000858174
ENSDARG00000002402	ercc3	ENSMUSG00000024382	Ercc3	ortholog_one2one	87.468	87.3563	0	52.52	0	-0.0694181	0.932944	-0.644429	8.90337e-06	-1.09509	3.46367e-09
ENSDARG00000060030	setd1a	ENSMUSG00000042308	Setd1a	ortholog_one2many	37.328	49.0093	50	49.32	0	-0.0689802	0.620639	0.191113	0.540838	0.645688	0.0192042
ENSDARG00000061802	cnot2	ENSMUSG00000020166	Cnot2	ortholog_one2one	87.8846	84.6296	0	50.07	0	-0.0667558	0.736971	-0.122185	0.070524	-0.157494	0.020849
ENSDARG00000021112	c1d	ENSMUSG00000000581	C1d	ortholog_one2one	58.1081	60.9929	0	69.57	0	-0.0660815	0.858339	-0.0849013	0.272544	-0.321524	0.000155845
ENSDARG00000051953	ythdc1	ENSMUSG00000035851	Ythdc1	ortholog_one2one	70.8395	65.3533	25	75.76	1	-0.0651101	0.743089	-0.327647	3.9805e-05	-0.397965	3.54853e-06
ENSDARG00000005576	mphosph8	ENSMUSG00000079184	Mphosph8	ortholog_one2one	39.3875	43.4732	25	48.87	0	-0.063189	0.691869	0.244778	0.0359284	0.406858	0.000911151
ENSDARG00000104279	appa	ENSMUSG00000022892	App	ortholog_one2many	61.6511	66.6187	100	1.98	1	-0.0617984	0.845446	1.3606	7.90757e-13	0.840576	6.12975e-09
ENSDARG00000042004	nfya	ENSMUSG00000023994	Nfya	ortholog_one2many	69.4236	79.8271	0	73.16	0	-0.0577861	0.767763	0	0.00609401	0	6.60943e-08
ENSDARG00000019307	dusp5	ENSMUSG00000034765	Dusp5	ortholog_one2one	54.8913	52.6042	75	60.18	1	-0.0556036	0.878995	1.30423	7.95738e-09	-0.0127637	0.995881
ENSDARG00000060002	ogg1	ENSMUSG00000030271	Ogg1	ortholog_one2one	48.3376	54.7826	0	44.67	0	-0.0538828	0.980899	-0.121016	0.469002	0.83398	1.81997e-06
ENSDARG00000059812	sin3ab	ENSMUSG00000042557	Sin3a	ortholog_one2many	75.6735	74.7847	0	0.36	0	-0.0531244	0.859343	0.390054	5.9073e-06	0.557663	2.21723e-08
ENSDARG00000021938	smad9	ENSMUSG00000027796	Smad9	ortholog_one2one	80.6867	87.4419	100	0.72	1	-0.0517038	0.725334	-0.993587	0.0459578	-0.642351	0.159889
ENSDARG00000104374	smchd1	ENSMUSG00000024054	Smchd1	ortholog_one2one	48.9158	48.3308	50	36.69	0	-0.0506261	0.905237	-0.149188	0.185121	0.0599911	0.536132
ENSDARG00000060596	prkaa1	ENSMUSG00000050697	Prkaa1	ortholog_one2one	83.7696	85.8676	0	57.33	0	-0.0478653	0.95293	-0.588838	7.72241e-07	-0.284337	0.00401125
ENSDARG00000001015	znf384l	ENSMUSG00000038346	Zfp384	ortholog_one2many	44.4954	33.2192	0	59.72	0	-0.0459203	0.864525	0.0767183	0.490733	0.159281	0.127668
ENSDARG00000008237	sars	ENSMUSG00000068739	Sars	ortholog_one2one	80.6576	77.7985	0	100	1	-0.0446168	0.966551	0.0857879	0.164975	-0.0551448	0.395166
ENSDARG00000099175	hmgb1a	ENSMUSG00000066551	Hmgb1	ortholog_one2many	78.6802	72.093	25	97.95	1	-0.0436109	0.840983	-0.208976	4.43206e-06	-0.186863	2.134e-05
ENSDARG00000031795	abcf1	ENSMUSG00000038762	Abcf1	ortholog_one2one	66.8187	70.0119	25	48.2	0	-0.0387269	0.981384	0.178474	0.0686863	-0.20115	0.0369571
ENSDARG00000100129	brd3b	ENSMUSG00000026918	Brd3	ortholog_one2many	75.1098	69.0444	50	10.48	0	-0.0377397	0.822485	-0.428809	1.11602e-07	0.108162	0.0609465
ENSDARG00000007960	hnrnpaba	ENSMUSG00000020358	Hnrnpab	ortholog_one2many	69.4118	71.0843	0	82.69	1	-0.0372518	0.924393	0.586653	2.48562e-11	0.0943105	0.0672771
ENSDARG00000055381	bambia	ENSMUSG00000024232	Bambi	ortholog_one2many	64.0927	63.8462	50	96.46	1	-0.0367362	0.990561	3.17115	7.74477e-22	1.91036	1.51892e-16
ENSDARG00000057249	zmynd11	ENSMUSG00000021156	Zmynd11	ortholog_one2one	62.9688	66.7219	50	91.16	1	-0.0351261	0.885966	0.224504	0.000234729	0.194429	0.0010295
ENSDARG00000098074	trip4	ENSMUSG00000032386	Trip4	ortholog_one2one	60.2837	58.5198	25	33.73	0	-0.0351241	0.839596	-0.11092	0.272143	-0.818228	1.61464e-08
ENSDARG00000003021	hdac8	ENSMUSG00000067567	Hdac8	ortholog_one2one	72.2222	72.4138	75	90.19	1	-0.0233907	0.905182	0.908555	2.59151e-06	0.207135	0.226175
ENSDARG00000003446	ippk	ENSMUSG00000021385	Ippk	ortholog_one2one	56.7288	56.0327	50	55.65	0	-0.0213105	1	0.224053	0.000555946	0.958585	3.73217e-14
ENSDARG00000088619	rexo4	ENSMUSG00000052406	Rexo4	ortholog_one2one	38.2775	37.037	0	25.48	0	-0.0201216	0.989068	-0.904793	2.34077e-09	-0.721659	1.01984e-07
ENSDARG00000067784	SLC9A1	ENSMUSG00000028854	Slc9a1	ortholog_one2one	75.0439	52.0732	0	82.94	1	-0.0193006	1	0.805465	5.18971e-09	-0.249208	0.0144068
ENSDARG00000086327	srrm4	ENSMUSG00000063919	Srrm4	ortholog_one2many	42.3345	39.9671	75	67.84	0	-0.0163546	0.957821	0	6.11952e-17	-1.14595	1.10613e-10
ENSDARG00000094992	otx1b	ENSMUSG00000005917	Otx1	ortholog_one2one	79.8762	72.6761	100	50.46	1	-0.0140604	0.898776	0.0138324	1	0.482435	0.113324
ENSDARG00000014215	cdh13	ENSMUSG00000031841	Cdh13	ortholog_one2one	59.4708	59.8039	25	78.13	1	-0.0139056	1	-3.30255	2.1657e-13	0.459683	0.000160043
ENSDARG00000021288	mier3b	ENSMUSG00000032727	Mier3	ortholog_one2many	60.6403	58.4392	0	16.96	0	-0.0136749	1	-0.0550847	0.674301	0.0109376	0.955291
ENSDARG00000091187	BX649250.1	ENSMUSG00000025878	Uimc1	ortholog_one2one	20.3501	25.5846	50	0.33	0	-0.0133536	1	-0.549984	9.96014e-07	-0.462725	1.02143e-05
ENSDARG00000090993	rnf4	ENSMUSG00000029110	Rnf4	ortholog_one2one	46.1957	43.8144	0	19.05	0	-0.0131754	0.994981	0.25965	2.39632e-06	-0.00321882	1
ENSDARG00000044056	ahi1	ENSMUSG00000019986	Ahi1	ortholog_one2one	36.9656	42.1203	0	5.24	0	-0.00488884	0.994471	-0.691729	5.4224e-12	-0.133559	0.0153723
ENSDARG00000031434	rcor1	ENSMUSG00000037896	Rcor1	ortholog_one2one	60.0437	71.9895	75	36.51	1	-0.00272097	1	-0.179379	0.0144276	0.538612	3.26834e-08
ENSDARG00000053498	ednrbb	ENSMUSG00000022122	Ednrb	ortholog_one2many	58.9041	48.6425	0	0	0	0	1	-6.04861	2.93338e-24	0.867587	7.09709e-10
ENSDARG00000059043	ntf3	ENSMUSG00000049107	Ntf3	ortholog_one2one	52.6749	47.2325	50	43.34	0	0	0.0923968	-5.95354	2.4645e-23	-1.23836	1.41419e-11
ENSDARG00000028469	rps6ka2	ENSMUSG00000023809	Rps6ka2	ortholog_one2one	88.4038	88.4038	25	24.78	0	0	0.00707398	-5.54202	3.16901e-27	-2.92236	9.75616e-22
ENSDARG00000034107	actl6b	ENSMUSG00000029712	Actl6b	ortholog_one2one	85.9155	85.9155	0	47.08	0	0	1	-4.92729	4.99251e-19	-1.87295	2.60608e-13
ENSDARG00000078508	KCP	ENSMUSG00000059022	Kcp	ortholog_one2one	36.0867	45.0968	0	8.69	0	0	2.03841e-06	-4.88803	6.00194e-29	-2.32683	6.41112e-23
ENSDARG00000017880	kcnip3b	ENSMUSG00000079056	Kcnip3	ortholog_one2one	67.1815	61.2676	0	0.56	0	0	1.03264e-07	-4.51318	2.78438e-21	-0.928118	1.10613e-09
ENSDARG00000098622	ccne1	ENSMUSG00000002068	Ccne1	ortholog_one2one	57.3171	57.598	100	27.47	1	0	0.000136409	-4.25271	2.421e-17	-2.84279	1.66065e-14
ENSDARG00000079182	NPAS3	ENSMUSG00000021010	Npas3	ortholog_one2one	74.184	54.0541	50	97.06	1	0	0.00111827	-3.08678	2.63486e-15	-0.451881	6.12061e-05
ENSDARG00000075949	prkd1	ENSMUSG00000002688	Prkd1	ortholog_one2one	79.7968	77.0153	100	66.86	1	0	0.00166965	-3.0833	4.3014e-22	-2.11646	1.02527e-18
ENSDARG00000103361	tshz3b	ENSMUSG00000021217	Tshz3	ortholog_one2one	69.1369	73.358	75	99.4	1	0	2.58206e-06	-3.02818	7.54849e-13	-1.67531	2.84021e-10
ENSDARG00000100475	fgf10b	ENSMUSG00000021732	Fgf10	ortholog_one2many	54.7264	52.6316	0	8.41	0	0	1.6368e-13	-2.94895	8.0352e-21	0.920666	2.83509e-12
ENSDARG00000058471	plk1	ENSMUSG00000030867	Plk1	ortholog_one2one	71.9328	70.9784	75	89.88	1	0	0.000177509	-2.45584	8.92085e-10	0.598919	0.00170708
ENSDARG00000045262	gsnb	ENSMUSG00000026879	Gsn	ortholog_one2many	66.2088	61.7949	0	62.06	0	0	0.000136144	-2.20858	3.87448e-19	1.06436	8.65643e-13
ENSDARG00000006137	star	ENSMUSG00000031574	Star	ortholog_one2one	56.8421	57.0423	50	78.73	1	0	0.00613408	-2.10504	8.6623e-06	-2.09339	9.42934e-06
ENSDARG00000015506	klf5a	ENSMUSG00000005148	Klf5	ortholog_one2many	54.0698	41.704	50	34.98	0	0	0.015886	-2.06704	3.32428e-19	0.953015	9.98644e-13
ENSDARG00000097660	trappc2	ENSMUSG00000079317	Trappc2	ortholog_one2many	94.2857	94.2857	50	61.75	0	0	#N/A	-1.95808	4.93237e-20	-1.27793	3.39376e-16
ENSDARG00000101980	bmper	ENSMUSG00000031963	Bmper	ortholog_one2one	66.4671	64.8175	25	83.9	1	0	3.90782e-11	-1.9492	5.13366e-19	-1.13912	1.93704e-14
ENSDARG00000011785	tbx6	ENSMUSG00000030699	Tbx6	ortholog_one2one	21.167	42.4312	25	35.28	0	0	5.97608e-05	-1.818	3.72463e-05	0	1.4234e-07
ENSDARG00000059575	uhmk1	ENSMUSG00000026667	Uhmk1	ortholog_one2one	69.0698	70.8831	0	98.07	1	0	0.00242016	-1.8104	2.18496e-19	-1.0071	2.08056e-14
ENSDARG00000079972	nfatc2b	ENSMUSG00000027544	Nfatc2	ortholog_one2many	47.2222	40.3452	0	0	0	0	0.931234	-1.66178	5.91984e-11	-1.38088	7.27401e-10
ENSDARG00000068255	nanos3	ENSMUSG00000056155	Nanos3	ortholog_one2one	32.7044	29.2135	25	54.29	0	0	0.0434381	-1.65825	1.60221e-09	-1.56594	4.87999e-09
ENSDARG00000078050	phf19	ENSMUSG00000026873	Phf19	ortholog_one2one	63.4103	61.7647	25	48.34	0	0	1.30561e-06	-1.64468	2.77454e-06	-0.193704	0.392144
ENSDARG00000006110	chd	ENSMUSG00000006958	Chrd	ortholog_one2one	45.7447	45.3587	0	25.82	0	0	0.780932	-1.63789	4.0133e-05	-1.64284	4.25206e-05
ENSDARG00000054931	ppp2r5b	ENSMUSG00000024777	Ppp2r5b	ortholog_one2one	78.9264	79.8793	50	2.97	0	0	0.577252	-1.61705	9.59355e-16	-1.11816	1.35349e-12
ENSDARG00000036168	nfatc1	ENSMUSG00000033016	Nfatc1	ortholog_one2one	58.2468	53.7806	50	43.99	0	0	0.000624225	-1.61585	8.48689e-19	-2.84132	1.46115e-22
ENSDARG00000028222	itgb8	ENSMUSG00000025321	Itgb8	ortholog_one2one	41.9304	34.5502	25	9.39	0	0	5.03203e-07	-1.57529	4.84053e-11	1.29978	3.92197e-13
ENSDARG00000105374	CU457819.1	ENSMUSG00000093769	Hist2h3c1	ortholog_one2one	100	100	0	0	0	0	#N/A	-1.43436	1.65492e-05	-1.16496	0.00012873
ENSDARG00000103868	E2F1	ENSMUSG00000027490	E2f1	ortholog_one2one	46.6513	46.9767	25	5.55	0	0	1	-1.40482	0.0108302	0	9.71841e-05
ENSDARG00000043720	cdc45	ENSMUSG00000000028	Cdc45	ortholog_one2one	72.2028	72.9682	75	98.78	1	0	4.59506e-06	-1.39833	3.28991e-07	-1.93206	4.24994e-09
ENSDARG00000077768	malt1	ENSMUSG00000032688	Malt1	ortholog_one2one	51.7748	51.5225	0	46.79	0	0	#N/A	-1.35924	4.85854e-10	1.19363	5.38862e-12
ENSDARG00000032264	mybl2b	ENSMUSG00000017861	Mybl2	ortholog_one2many	53.0806	47.7273	25	41.82	0	0	0.00081734	-1.33195	5.75613e-06	0	1.46217e-09
ENSDARG00000089107	si:ch1073-189o9.1	ENSMUSG00000005373	Mlxipl	ortholog_one2one	37.2137	22.5694	0	13.06	0	0	1	-1.29426	1.6828e-10	-0.877882	7.93933e-08
ENSDARG00000069026	adcy1a	ENSMUSG00000020431	Adcy1	ortholog_one2many	70.1077	69.8569	50	1.84	0	0	0.0573854	-1.29327	1.29953e-06	0.230653	0.124128
ENSDARG00000103591	dkk3a	ENSMUSG00000030772	Dkk3	ortholog_one2many	35.4949	29.7994	75	1.64	0	0	7.97651e-08	-1.22675	7.40927e-10	2.43129	2.9896e-17
ENSDARG00000104700	acvr2ab	ENSMUSG00000052155	Acvr2a	ortholog_one2one	74.1617	73.2943	25	13.79	0	0	1	-1.1642	4.72289e-12	-1.31918	6.47282e-13
ENSDARG00000098687	pygo1	ENSMUSG00000034910	Pygo1	ortholog_one2one	52.2255	42.2062	50	65.67	0	0	4.24562e-05	-1.1437	7.37794e-15	-1.87258	2.94631e-18
ENSDARG00000077089	blm	ENSMUSG00000030528	Blm	ortholog_one2one	45.0674	44.7498	0	24.65	0	0	5.10853e-07	-1.09394	0.000679332	-0.279599	0.262289
ENSDARG00000077559	CABZ01052290.1	ENSMUSG00000039697	Ncoa7	ortholog_one2many	52.549	14.21	0	0.06	0	0	#N/A	-1.04614	1.36045e-06	0.33841	0.0200173
ENSDARG00000102898	CABZ01041223.1	ENSMUSG00000028890	Mtf1	ortholog_one2one	46.6431	19.5556	50	43.07	0	0	0.496764	-0.92635	1.0245e-09	-1.41265	1.46899e-12
ENSDARG00000103691	RFX7 (1 of many)	ENSMUSG00000037674	Rfx7	ortholog_one2many	52.0954	55.3804	25	78.86	1	0	#N/A	-0.909037	5.42243e-08	-0.669617	3.3819e-06
ENSDARG00000045768	cry1aa	ENSMUSG00000020038	Cry1	ortholog_one2many	78.3522	80.033	25	90.08	1	0	#N/A	-0.865519	0.000155845	-0.264947	0.185658
ENSDARG00000102403	cry2	ENSMUSG00000068742	Cry2	ortholog_one2one	68.7291	69.4257	50	0	0	0	#N/A	-0.832413	1.12781e-07	-0.794752	2.51182e-07
ENSDARG00000070463	e2f3	ENSMUSG00000016477	E2f3	ortholog_one2one	47.0862	44.2013	25	1	0	0	0.00447241	-0.826237	8.97819e-05	-0.895321	3.8259e-05
ENSDARG00000008454	cpeb1b	ENSMUSG00000025586	Cpeb1	ortholog_one2many	67.4419	67.0818	0	8.55	0	0	0.0221261	-0.821359	0.000136633	-1.44837	2.53603e-07
ENSDARG00000042894	tyms	ENSMUSG00000025747	Tyms	ortholog_one2one	76.4151	79.1531	0	76.31	1	0	1.95011e-05	-0.738208	1.54926e-09	0.0332433	0.73275
ENSDARG00000079730	FUZ	ENSMUSG00000011658	Fuz	ortholog_one2one	43.3333	43.8554	0	11.48	0	0	2.9872e-06	-0.724906	1.71907e-10	-0.692283	4.05643e-10
ENSDARG00000062550	rc3h1a	ENSMUSG00000040423	Rc3h1	ortholog_one2many	61.6883	58.8496	50	9.55	0	0	#N/A	-0.721054	5.51938e-05	0.987556	2.58565e-09
ENSDARG00000088036	si:dkey-106g10.7	ENSMUSG00000053080	2700081O15Rik	ortholog_one2one	31.52	29.056	25	7.42	0	0	#N/A	-0.703164	0.00755995	1.37899	6.65378e-09
ENSDARG00000053666	myb	ENSMUSG00000019982	Myb	ortholog_one2one	58.5023	49.6689	75	28.96	1	0	2.04793e-05	-0.693981	0.235094	1.98394	2.53603e-07
ENSDARG00000075732	taf4b	ENSMUSG00000054321	Taf4b	ortholog_one2one	32.8932	32.0468	0	17.48	0	0	4.35742e-09	-0.661164	1.55465e-05	0.634913	4.51858e-06
ENSDARG00000079452	rbm46	ENSMUSG00000033882	Rbm46	ortholog_one2one	64.5098	61.7261	75	84.75	1	0	1	-0.619319	0.00271415	-0.793454	0.000464069
ENSDARG00000023903	atf2	ENSMUSG00000027104	Atf2	ortholog_one2one	72.1311	72.2793	50	54.18	0	0	0.0490509	-0.603388	8.89368e-10	-0.244172	0.000338418
ENSDARG00000059044	epm2a	ENSMUSG00000055493	Epm2a	ortholog_one2one	61.0063	58.7879	0	26.95	0	0	1	-0.583807	8.36387e-05	-1.52234	8.2445e-11
ENSDARG00000102111	zbtb49	ENSMUSG00000029127	Zbtb49	ortholog_one2one	55.706	38.0952	75	79.76	1	0	1.52317e-06	-0.562947	2.32342e-05	0.0976845	0.33471
ENSDARG00000036061	ogfod1	ENSMUSG00000033009	Ogfod1	ortholog_one2one	54.1267	51.7431	0	65.67	0	0	4.34299e-08	-0.551484	0.000290219	-0.0194187	0.96328
ENSDARG00000086126	trim33l	ENSMUSG00000005566	Trim28	ortholog_one2one	13.3024	20.6235	0	0	0	0	5.31148e-07	-0.551373	1.57011e-11	-0.559523	1.38015e-11
ENSDARG00000044038	zbtb2a	ENSMUSG00000075327	Zbtb2	ortholog_one2many	47.6821	42.0233	75	0	0	0	7.67573e-10	-0.543287	1.93986e-05	0.588976	1.35263e-06
ENSDARG00000058940	si:ch211-248e11.2	ENSMUSG00000026831	1700007K13Rik	ortholog_one2one	39.4161	32.3353	0	0	0	0	#N/A	-0.538649	0.000678877	0.776804	1.64524e-06
ENSDARG00000003250	pik3cd	ENSMUSG00000039936	Pik3cd	ortholog_one2one	69.2012	68.6724	75	37.65	1	0	0.00721746	-0.517705	2.17165e-07	-1.75277	3.96732e-16
ENSDARG00000076466	maml1	ENSMUSG00000050567	Maml1	ortholog_one2one	31.9773	33.1373	50	96.61	0	0	0.0732313	-0.461821	0.0294037	0.645287	0.000383932
ENSDARG00000076569	ndp	ENSMUSG00000040138	Ndp	ortholog_one2one	62.3188	65.6489	100	73.35	1	0	3.26524e-11	-0.448528	0.0523563	0.850809	8.95833e-05
ENSDARG00000019707	spout1	ENSMUSG00000039660	Spout1	ortholog_one2one	65.8793	65.1948	0	38.34	0	0	#N/A	-0.432056	0.00582324	-0.482411	0.00246189
ENSDARG00000006677	ripk1l	ENSMUSG00000021408	Ripk1	ortholog_one2one	37.0651	37.3476	0	44.3	0	0	0.00885522	-0.405213	7.88795e-06	-0.232062	0.00329895
ENSDARG00000069696	si:ch211-261n11.5	ENSMUSG00000056260	Lrif1	ortholog_one2one	14.3312	17.8808	0	0	0	0	#N/A	-0.395986	0.000503836	-0.658879	1.19177e-06
ENSDARG00000058127	hcfc2	ENSMUSG00000020246	Hcfc2	ortholog_one2one	51.9774	50.9695	50	0	0	0	1.42214e-07	-0.385475	1.0218e-06	-0.079548	0.205034
ENSDARG00000076920	ZNF335	ENSMUSG00000039834	Zfp335	ortholog_one2many	45.0456	51.6829	25	72.16	0	0	#N/A	-0.340256	0.0174001	-0.241313	0.0850868
ENSDARG00000102896	jmjd6	ENSMUSG00000056962	Jmjd6	ortholog_one2one	84.3672	84.3672	50	83.68	1	0	0.413423	-0.338729	0.0110448	-0.234896	0.0667734
ENSDARG00000018109	mafga	ENSMUSG00000051510	Mafg	ortholog_one2many	88.8889	88.8889	0	0	0	0	1	-0.315029	0.0239317	-0.0567828	0.694422
ENSDARG00000074213	eif3bb	ENSMUSG00000056076	Eif3b	ortholog_one2many	85.6094	72.6027	25	3.26	0	0	0.00157211	-0.305464	0.000308275	-0.20096	0.0110051
ENSDARG00000087804	tnfrsf11a	ENSMUSG00000026321	Tnfrsf11a	ortholog_one2one	24.5645	22.56	25	4.57	0	0	1.38401e-06	-0.268	0.407285	0	1.44666e-05
ENSDARG00000103651	map3k12	ENSMUSG00000023050	Map3k12	ortholog_one2one	64.3255	64.9775	25	98.03	1	0	0.990631	-0.253471	0.23915	-0.22955	0.278219
ENSDARG00000101859	MNT (1 of many)	ENSMUSG00000000282	Mnt	ortholog_one2many	55.4577	53.2995	50	25.35	0	0	#N/A	-0.203137	0.442957	-0.0792345	0.823332
ENSDARG00000019752	rom1a	ENSMUSG00000071648	Rom1	ortholog_one2many	38.3523	38.4615	0	0	0	0	0.0053704	-0.194083	0.0691601	0.31657	0.00406609
ENSDARG00000036471	dand5	ENSMUSG00000053226	Dand5	ortholog_one2many	18.107	23.7838	25	0	0	0	0.996061	-0.1752	0.172626	-0.104612	0.402231
ENSDARG00000055672	map3k10	ENSMUSG00000040390	Map3k10	ortholog_one2one	55.838	63.0851	25	82.8	1	0	0.420296	-0.0838143	0.588457	0.107164	0.52081
ENSDARG00000103158	LDB1 (1 of many)	ENSMUSG00000025223	Ldb1	ortholog_one2many	66.5663	53.7713	0	2.7	0	0	#N/A	-0.080846	0.440616	-0.513721	1.80012e-05
ENSDARG00000090826	si:dkey-33g10.1	ENSMUSG00000045248	Med26	ortholog_one2one	32.2105	26.0204	25	0	0	0	1	-0.0550774	0.587745	-0.558954	1.07597e-06
ENSDARG00000075226	smad4a	ENSMUSG00000024515	Smad4	ortholog_one2many	87.7514	87.1143	0	80.19	1	0	#N/A	-0.0473675	0.564915	-0.639682	8.50629e-09
ENSDARG00000090570	naa40	ENSMUSG00000024764	Naa40	ortholog_one2many	78.1022	45.1477	0	0	0	0	0.574805	-0.0261702	0.810021	-0.19705	0.0179951
ENSDARG00000058924	pou1f1	ENSMUSG00000004842	Pou1f1	ortholog_one2one	58.8571	70.7904	75	12.53	1	0	2.18821e-05	0	0.0279977	0	0.501542
ENSDARG00000053829	pax9	ENSMUSG00000001497	Pax9	ortholog_one2one	73.1778	73.3918	75	62.12	1	0	4.71552e-06	0	1	0	1
ENSDARG00000062510	bcl11ba	ENSMUSG00000048251	Bcl11b	ortholog_one2one	69.201	60.7466	75	91.48	1	0	2.29025e-09	0	1	0	1
ENSDARG00000019835	nkx2.1	ENSMUSG00000001496	Nkx2-1	ortholog_one2one	73.4104	68.2796	75	80.86	1	0	0.000364051	0	1	0	0.605253
ENSDARG00000104361	barhl2	ENSMUSG00000034384	Barhl2	ortholog_one2one	83.7912	79.4271	75	99.27	1	0	3.33836e-05	0	#N/A	0	#N/A
ENSDARG00000030999	mybl1	ENSMUSG00000025912	Mybl1	ortholog_one2one	54.5946	53.7949	75	32.8	1	0	3.52286e-05	0	0.176852	0	0.0775352
ENSDARG00000069133	mstnb	ENSMUSG00000026100	Mstn	ortholog_one2many	66.3102	65.9574	100	87.95	1	0	9.64146e-10	0	1	0	2.73504e-06
ENSDARG00000039458	lhx4	ENSMUSG00000026468	Lhx4	ortholog_one2one	83.376	83.5897	100	98.31	1	0	4.80544e-09	0	#N/A	0	#N/A
ENSDARG00000074905	camk1da	ENSMUSG00000039145	Camk1d	ortholog_one2many	76.7857	78.1818	100	50.79	1	0	1.00982e-08	0	0.496098	0	0.00230795
ENSDARG00000054683	prdm8b	ENSMUSG00000035456	Prdm8	ortholog_one2one	62.2807	51.5988	75	91.63	1	0	5.65515e-05	0	1	0	1
ENSDARG00000055395	foxq1b	ENSMUSG00000038415	Foxq1	ortholog_one2many	54.6053	41.5	100	45.82	1	0	6.92349e-05	0	0.120569	0	0.504228
ENSDARG00000008186	syk	ENSMUSG00000021457	Syk	ortholog_one2one	70.7237	68.3625	75	51.68	1	0	0.000141733	0	7.30553e-05	0	7.7486e-10
ENSDARG00000006921	lrp5	ENSMUSG00000024913	Lrp5	ortholog_one2one	74.6749	74.7212	75	2.24	1	0	0.00016235	0	0.873851	0	0.087655
ENSDARG00000058039	bhlhe22	ENSMUSG00000025128	Bhlhe22	ortholog_one2one	58.6207	43.0986	75	97.11	1	0	0.000483853	0	0.888195	0	0.821582
ENSDARG00000019566	neurod1	ENSMUSG00000034701	Neurod1	ortholog_one2one	75.1429	73.6695	100	99.57	1	0	0.000749555	0	1	0	0.3225
ENSDARG00000056979	lhx9	ENSMUSG00000019230	Lhx9	ortholog_one2one	88.6364	88.4131	100	93.82	1	0	0.00148597	0	0.000566672	0	0.000583856
ENSDARG00000040261	runx2a	ENSMUSG00000039153	Runx2	ortholog_one2many	75.9414	68.75	100	56.67	1	0	0.00158475	0	0.930575	0	0.760307
ENSDARG00000010591	foxn4	ENSMUSG00000042002	Foxn4	ortholog_one2one	51.4545	54.3186	75	57.93	1	0	0.472176	0	1	0	1
ENSDARG00000056023	hoxb9a	ENSMUSG00000020875	Hoxb9	ortholog_one2one	72.6908	72.4	75	100	1	0	0.713736	0	1	0	1
ENSDARG00000006896	lhx6	ENSMUSG00000026890	Lhx6	ortholog_one2one	76	72.7041	100	70.87	1	0	0.841361	0	1	0	1
ENSDARG00000021494	hnf4a	ENSMUSG00000017950	Hnf4a	ortholog_one2one	82.2894	80.3797	100	93.96	1	0	0.914359	0	1	0	1
ENSDARG00000017107	nr2e1	ENSMUSG00000019803	Nr2e1	ortholog_one2one	89.3939	91.9481	100	83.06	1	0	0.974418	0	2.01549e-07	0	2.12939e-07
ENSDARG00000101706	csrp3	ENSMUSG00000030470	Csrp3	ortholog_one2one	74.0933	73.7113	75	100	1	0	0.993127	0	1	0	1
ENSDARG00000015399	foxf1	ENSMUSG00000042812	Foxf1	ortholog_one2one	73.9474	74.3386	75	90.92	1	0	1	0	1	0	1
ENSDARG00000025420	fzd5	ENSMUSG00000045005	Fzd5	ortholog_one2one	70.1013	70.9402	75	0	1	0	1	0	0.0760431	0	0.216946
ENSDARG00000040907	gcgb	ENSMUSG00000000394	Gcg	ortholog_one2many	59.6774	41.1111	75	91.66	1	0	1	0	1	0	3.222e-14
ENSDARG00000090387	onecut2	ENSMUSG00000045991	Onecut2	ortholog_one2one	74.2678	70.297	75	50.69	1	0	1	0	0.86602	0	0.87817
ENSDARG00000068567	shha	ENSMUSG00000002633	Shh	ortholog_one2many	69.6172	66.5904	75	98.63	1	0	1	0	0.534039	0	0.542689
ENSDARG00000056400	helt	ENSMUSG00000047171	Helt	ortholog_one2one	52.963	59.5833	75	50.46	1	0	1	0	4.43861e-05	0	0.596367
ENSDARG00000000563	ttn.1	ENSMUSG00000051747	Ttn	ortholog_one2many	57.2345	49.8551	75	38.19	1	0	#N/A	0	0.311197	0	0.085264
ENSDARG00000054741	prkg2	ENSMUSG00000029334	Prkg2	ortholog_one2one	69.961	70.6037	75	100	1	0	#N/A	0	1.62885e-05	1.01191	4.58198e-05
ENSDARG00000020237	mc1r	ENSMUSG00000074037	Mc1r	ortholog_one2one	52.0124	53.3333	0	86.64	1	0	0.000238777	0	1	0	1
ENSDARG00000037383	pax5	ENSMUSG00000014030	Pax5	ortholog_one2one	73.7374	74.6803	50	76.81	1	0	3.09023e-05	0	0.00674188	0	1
ENSDARG00000061478	igf2bp1	ENSMUSG00000013415	Igf2bp1	ortholog_one2one	77.0903	79.896	25	100	1	0	0.00114845	0	1	0	1
ENSDARG00000040946	olig2	ENSMUSG00000039830	Olig2	ortholog_one2one	69.2308	58.5139	25	100	1	0	0.00242646	0	1	0	1
ENSDARG00000104735	nkx6.2	ENSMUSG00000041309	Nkx6-2	ortholog_one2one	78.0576	78.3393	50	99.65	1	0	0.00643785	0	1	0	1
ENSDARG00000015567	zic1	ENSMUSG00000032368	Zic1	ortholog_one2one	89.1403	88.1432	50	100	1	0	1.03976e-05	0	0.103541	0	0.0604122
ENSDARG00000103969	smyhc2	ENSMUSG00000040752	Myh6	ortholog_many2many	85.6111	85.6553	50	99.78	1	0	3.44062e-06	0	#N/A	0	#N/A
ENSDARG00000077228	ntrk3a	ENSMUSG00000059146	Ntrk3	ortholog_one2many	74.5432	74.1818	50	100	1	0	0.000714488	0	0.0878061	0	6.64787e-08
ENSDARG00000069912	hmga2	ENSMUSG00000056758	Hmga2	ortholog_one2one	69.0909	58.9147	50	100	1	0	7.99148e-12	0	0.90199	0	0.812667
ENSDARG00000006526	fn1b	ENSMUSG00000026193	Fn1	ortholog_one2many	55.4	55.9144	25	77.31	1	0	3.73084e-09	0	0.000846706	0	3.39725e-11
ENSDARG00000053301	insm1b	ENSMUSG00000068154	Insm1	ortholog_one2many	62.6632	46.0653	50	79.8	1	0	4.00651e-06	0	1	0	1
ENSDARG00000070228	cdk6	ENSMUSG00000040274	Cdk6	ortholog_one2one	79.6296	79.1411	25	97.77	1	0	2.00356e-05	0	0.0459535	0	0.680031
ENSDARG00000006983	celf3b	ENSMUSG00000028137	Celf3	ortholog_one2many	80.9955	72.4696	0	78.34	1	0	4.03554e-05	0	0.215892	0	0.767998
ENSDARG00000024488	top2a	ENSMUSG00000020914	Top2a	ortholog_one2one	64.9936	66.9503	25	84.21	1	0	0.000560423	0	0.000437393	0	1.61426e-05
ENSDARG00000036308	nod1	ENSMUSG00000038058	Nod1	ortholog_one2one	50	49.3179	0	83.26	1	0	0.0133458	0	3.46022e-17	0	0.778441
ENSDARG00000088124	adrb2a	ENSMUSG00000045730	Adrb2	ortholog_one2many	51.3447	50.2392	50	75.01	1	0	0.0168066	0	1.31333e-06	0	1.32759e-11
ENSDARG00000020853	galr2a	ENSMUSG00000020793	Galr2	ortholog_many2many	58.1267	56.8733	0	79.23	1	0	0.0263963	0	0.000899024	0	5.60668e-10
ENSDARG00000098969	reln	ENSMUSG00000042453	Reln	ortholog_one2one	58.3451	35.8567	0	81.16	1	0	0.253261	0	0.221958	0	0.159423
ENSDARG00000032639	cd36	ENSMUSG00000002944	Cd36	ortholog_one2one	52.4731	51.6949	50	97.17	1	0	0.506771	0	1	0	1
ENSDARG00000055240	xdh	ENSMUSG00000024066	Xdh	ortholog_one2one	65.507	66.2921	0	84.51	1	0	0.62346	0	1.56558e-17	0	0.97719
ENSDARG00000017821	gata5	ENSMUSG00000015627	Gata5	ortholog_one2one	59.2689	56.1881	25	88.97	1	0	0.990177	0	1	0	1
ENSDARG00000025495	nhlh2	ENSMUSG00000048540	Nhlh2	ortholog_one2many	75.4098	68.1481	25	100	1	0	1	0	1	0	1
ENSDARG00000060529	nkx6.3	ENSMUSG00000063672	Nkx6-3	ortholog_one2one	61.3971	63.7405	0	96.43	1	0	1	0	#N/A	0	#N/A
ENSDARG00000010192	pax3a	ENSMUSG00000004872	Pax3	ortholog_one2many	72.2986	76.0331	0	100	1	0	1	0	1	0	1
ENSDARG00000005150	tbx20	ENSMUSG00000031965	Tbx20	ortholog_one2one	86.9955	87.191	0	100	1	0	1	0	1	0	1
ENSDARG00000013649	casr	ENSMUSG00000051980	Casr	ortholog_one2one	74.7357	65.5236	0	93.08	1	0	#N/A	0	1	0	1
ENSDARG00000086114	CR792417.1	ENSMUSG00000058022	Adtrp	ortholog_one2one	37.7143	25.1908	0	0	0	0	4.76897e-08	0	1	0	1
ENSDARG00000017246	prx	ENSMUSG00000072812	Ahnak2	ortholog_one2many	38.9262	3.33717	0	1.14	0	0	6.39508e-05	0	1	0	1
ENSDARG00000000472	cntn2	ENSMUSG00000053024	Cntn2	ortholog_one2one	60.4953	49.3269	25	45.71	0	0	0.0640324	0	0.576857	0	0.585635
ENSDARG00000038990	wnt3	ENSMUSG00000000125	Wnt3	ortholog_one2one	89.5775	89.5775	25	22.91	0	0	1.70004e-13	0	#N/A	0	#N/A
ENSDARG00000012435	spic	ENSMUSG00000004359	Spic	ortholog_one2one	35.7414	38.843	50	0	0	0	0.000236466	0	1	0	1
ENSDARG00000037760	uncx4.1	ENSMUSG00000029546	Uncx	ortholog_one2many	55.5319	49.2453	25	9.78	0	0	4.51753e-06	0	#N/A	0	#N/A
ENSDARG00000076110	nwd1	ENSMUSG00000048148	Nwd1	ortholog_one2one	32.1186	34.188	50	31.12	0	0	3.59906e-09	0	1	0	1
ENSDARG00000088332	alx4a	ENSMUSG00000040310	Alx4	ortholog_one2many	69.5652	64.1604	25	20.6	0	0	0.00134288	0	1	0	1
ENSDARG00000101244	gli1	ENSMUSG00000025407	Gli1	ortholog_one2one	35.5413	44.9145	50	8.91	0	0	0.000389603	0	1	0	1
ENSDARG00000057210	has3	ENSMUSG00000031910	Has3	ortholog_one2one	75.2688	75.8123	50	33.63	0	0	2.04722e-05	0	1	0	1
ENSDARG00000078902	rims1b	ENSMUSG00000041670	Rims1	ortholog_one2many	55.9275	56.3202	25	59.22	0	0	0.000868924	0	0.00334319	0	0.942683
ENSDARG00000019658	pou2f2a	ENSMUSG00000008496	Pou2f2	ortholog_one2many	47.7528	58.319	25	19.11	0	0	0.00100984	0	0.95588	0	0.969109
ENSDARG00000025017	prdm8	ENSMUSG00000044519	Zfp488	ortholog_one2one	16.1355	24.0356	0	15.97	0	0	2.8879e-06	0	1	0	0.728036
ENSDARG00000071640	drd1a	ENSMUSG00000021478	Drd1	ortholog_one2many	70.6278	70.6278	0	0	0	0	1.12854e-12	0	1	0	1
ENSDARG00000069866	sox1a	ENSMUSG00000096014	Sox1	ortholog_one2many	80.8824	70.3325	25	0	0	0	3.25616e-12	0	1	0	1
ENSDARG00000003803	LHX3	ENSMUSG00000026934	Lhx3	ortholog_one2one	62.406	61.9403	25	36.26	0	0	4.60982e-11	0	1.45297e-23	-2.88517	1.48992e-19
ENSDARG00000052816	shmt1	ENSMUSG00000020534	Shmt1	ortholog_one2one	79.4179	79.9163	50	8.43	0	0	9.02718e-11	0	0.013769	0	0.000256046
ENSDARG00000054025	hoxb8b	ENSMUSG00000027102	Hoxd8	ortholog_one2one	50.6073	43.2526	0	0	0	0	3.90088e-10	0	1	0	1
ENSDARG00000099927	dpf1	ENSMUSG00000030584	Dpf1	ortholog_one2one	60.596	47.1649	0	13.02	0	0	1.38041e-09	0	2.4891e-06	0	2.58675e-06
ENSDARG00000052618	ahrrb	ENSMUSG00000021575	Ahrr	ortholog_one2one	40.1396	32.8103	25	74.07	0	0	3.23395e-09	0	1	0	1
ENSDARG00000018179	acvrl1	ENSMUSG00000000530	Acvrl1	ortholog_one2one	56.9721	56.9721	50	0	0	0	4.1414e-09	0	0.000420236	0	8.37235e-08
ENSDARG00000105083	chd5	ENSMUSG00000005045	Chd5	ortholog_one2one	76.2626	77.3566	50	5.87	0	0	4.48373e-09	0	0.0011872	0	0.0422625
ENSDARG00000078280	nkx3-1	ENSMUSG00000022061	Nkx3-1	ortholog_one2one	36.4486	32.9114	75	0	0	0	1.63798e-08	0	1	0	1
ENSDARG00000073814	pax1b	ENSMUSG00000037034	Pax1	ortholog_one2many	69.1176	52.6906	0	0	0	0	7.69451e-08	0	6.36193e-15	0	1
ENSDARG00000054026	mustn1a	ENSMUSG00000042485	Mustn1	ortholog_one2many	49.3671	47.561	0	21.24	0	0	8.50015e-08	0	0.191414	0	1
ENSDARG00000075608	mical2a	ENSMUSG00000038244	Mical2	ortholog_one2many	39.2496	59.8004	100	11.73	0	0	1.06624e-07	0	4.01278e-20	-4.2321	1.79533e-19
ENSDARG00000057741	nr1h4	ENSMUSG00000047638	Nr1h4	ortholog_one2one	62.94	62.2951	25	44.11	0	0	1.56358e-07	0	7.58312e-09	0	8.09745e-09
ENSDARG00000026166	emilin1b	ENSMUSG00000029163	Emilin1	ortholog_one2many	35.4043	35.2999	25	6.88	0	0	2.18255e-07	0	1.97266e-08	0	2.81498e-15
ENSDARG00000070542	mafbb	ENSMUSG00000074622	Mafb	ortholog_one2many	64.3258	70.8978	25	0	0	0	4.07668e-07	0	0.0441563	0	0.00018018
ENSDARG00000029497	tfcp2l1	ENSMUSG00000026380	Tfcp2l1	ortholog_one2one	67.0025	55.5324	50	16.95	0	0	6.44497e-07	0	3.90354e-06	0	3.36196e-08
ENSDARG00000040080	fli1b	ENSMUSG00000016087	Fli1	ortholog_one2many	51.3402	55.0885	0	0	0	0	7.94683e-07	0	0.0462628	0	0.00168656
ENSDARG00000098764	musk	ENSMUSG00000057280	Musk	ortholog_one2one	57.8108	60.9183	25	23.12	0	0	8.32412e-07	0	0.000252672	0	0.000251408
ENSDARG00000100560	zfpm2b	ENSMUSG00000022306	Zfpm2	ortholog_one2many	45.1967	42.9192	25	0.19	0	0	1.43608e-06	0	7.48801e-11	0	3.53404e-09
ENSDARG00000068763	plcg2	ENSMUSG00000034330	Plcg2	ortholog_one2one	59.1936	58.0237	0	54.96	0	0	1.90568e-06	0	6.42258e-10	0	7.63676e-08
ENSDARG00000026350	wasb	ENSMUSG00000031165	Was	ortholog_one2many	53.2359	49.0385	0	27.93	0	0	4.6353e-06	0	0.23587	0	0.0903202
ENSDARG00000063207	erbb4a	ENSMUSG00000062209	Erbb4	ortholog_one2many	67.9395	72.9876	25	14.06	0	0	4.89057e-06	0	0.000878209	3.12798	2.20402e-17
ENSDARG00000055374	irf4b	ENSMUSG00000021356	Irf4	ortholog_one2many	55.9165	53.5556	50	28.43	0	0	7.26979e-06	0	3.02443e-08	0	3.22542e-08
ENSDARG00000014103	dkk1a	ENSMUSG00000024868	Dkk1	ortholog_one2many	42.5781	40.0735	25	0	0	0	1.18723e-05	0	1	0	2.75538e-14
ENSDARG00000054332	trim66	ENSMUSG00000031026	Trim66	ortholog_one2one	29.7422	24.0327	75	42.18	0	0	1.71067e-05	0	0.0192722	0	1
ENSDARG00000040445	PARP14	ENSMUSG00000034422	Parp14	ortholog_one2one	32.9834	32.8564	25	12.69	0	0	2.45471e-05	0	2.74654e-15	0	1.83904e-09
ENSDARG00000086778	pdgfba	ENSMUSG00000000489	Pdgfb	ortholog_one2many	2.59179	4.97925	0	0.24	0	0	2.85493e-05	0	0.000204169	0	0.000211922
ENSDARG00000057323	e2f8	ENSMUSG00000046179	E2f8	ortholog_one2one	38.6041	41.1628	100	5.02	0	0	4.37256e-05	0	0.00140721	0	0.00503596
ENSDARG00000061885	satb2	ENSMUSG00000038331	Satb2	ortholog_one2one	63.4293	72.1692	50	53.49	0	0	5.06121e-05	0	1.63852e-05	0	0.328847
ENSDARG00000017321	kdr	ENSMUSG00000062960	Kdr	ortholog_one2one	47.9735	48.4015	100	22.59	0	0	7.09952e-05	0	0.221825	0	1
ENSDARG00000052826	runx3	ENSMUSG00000070691	Runx3	ortholog_one2one	62.5571	64.7754	50	19.7	0	0	7.24255e-05	0	4.60236e-14	0	1
ENSDARG00000009470	hnf1a	ENSMUSG00000029556	Hnf1a	ortholog_one2one	51.0714	45.5414	25	7.31	0	0	9.24658e-05	0	0.44792	0	0.331662
ENSDARG00000077897	znf296	ENSMUSG00000011267	Zfp296	ortholog_one2one	20.9119	29.8876	0	0	0	0	9.86475e-05	0	6.48102e-12	0	0.738142
ENSDARG00000007465	tdrd1	ENSMUSG00000025081	Tdrd1	ortholog_one2one	30.6973	30.802	100	4.94	0	0	0.000120246	0	1	0	1
ENSDARG00000023053	fam129ab	ENSMUSG00000026483	Fam129a	ortholog_one2many	32.3353	29.1577	25	6.61	0	0	0.000128988	0	0.76299	0	1
ENSDARG00000053617	camk2a	ENSMUSG00000024617	Camk2a	ortholog_one2one	92.0245	94.1423	25	21.64	0	0	0.000156177	0	0.146611	0	0.0997439
ENSDARG00000002445	prdm1a	ENSMUSG00000038151	Prdm1	ortholog_one2one	57.2165	53.949	50	33.79	0	0	0.000206518	0	1	0	1
ENSDARG00000011262	traip	ENSMUSG00000032586	Traip	ortholog_one2one	50.5519	48.7234	25	51.91	0	0	0.000296469	0	0.000105144	1.33811	3.2194e-06
ENSDARG00000103146	nlrc3	ENSMUSG00000049871	Nlrc3	ortholog_one2one	41.674	42.922	50	30.09	0	0	0.000312372	0	0.954294	0	7.97823e-10
ENSDARG00000068923	umodl1	ENSMUSG00000054134	Umodl1	ortholog_one2one	28.5263	20.1039	0	0	0	0	0.000363803	0	1.97154e-19	0	7.4271e-10
ENSDARG00000069726	glis3	ENSMUSG00000052942	Glis3	ortholog_one2one	45.0249	38.7166	25	1.2	0	0	0.000394787	0	0.917779	0	0.93767
ENSDARG00000071445	myoz1b	ENSMUSG00000068697	Myoz1	ortholog_one2many	40	33.7838	50	3.56	0	0	0.000432671	0	0.0149137	0	1
ENSDARG00000020655	INSM2	ENSMUSG00000045440	Insm2	ortholog_one2one	46.6809	44.2191	50	83.95	0	0	0.000531859	0	1	0	1
ENSDARG00000090890	cmklr1	ENSMUSG00000042190	Cmklr1	ortholog_one2many	40.7932	38.814	0	77.31	0	0	0.000597664	0	0.570202	0	0.0780038
ENSDARG00000070220	pou3f2a	ENSMUSG00000095139	Pou3f2	ortholog_one2many	72.4036	54.8315	25	0	0	0	0.000700854	0	0.0892446	2.63965	1.37171e-11
ENSDARG00000070677	fezf2	ENSMUSG00000021743	Fezf2	ortholog_one2one	69.4064	66.8132	0	50.38	0	0	0.000718881	0	0.0266939	0	0.0270703
ENSDARG00000102761	zbtb42	ENSMUSG00000037638	Zbtb42	ortholog_one2one	54.6539	54.5238	0	0	0	0	0.000943836	0	3.12488e-05	0	3.38458e-07
ENSDARG00000070165	tnfrsf1b	ENSMUSG00000028599	Tnfrsf1b	ortholog_one2one	25.8216	23.2068	0	0	0	0	0.0010993	0	0.0152787	0	1
ENSDARG00000010756	nod2	ENSMUSG00000055994	Nod2	ortholog_one2one	46.6327	45.1135	100	12.57	0	0	0.0022309	0	3.45934e-12	-1.12831	1.17488e-06
ENSDARG00000002597	pabpc1l	ENSMUSG00000054582	Pabpc1l	ortholog_one2one	61.7742	63.0972	0	70.2	0	0	0.00409536	0	0.00696869	0	2.20807e-05
ENSDARG00000041976	il17a/f3	ENSMUSG00000041872	Il17f	ortholog_many2many	29.0123	29.1925	50	0	0	0	0.00800955	0	#N/A	0	#N/A
ENSDARG00000006169	lrrk2	ENSMUSG00000036273	Lrrk2	ortholog_one2one	45.4581	45.5481	50	3.12	0	0	0.00826444	0	0.0584335	0	8.35628e-10
ENSDARG00000076520	mafb	ENSMUSG00000055435	Maf	ortholog_one2one	86.2385	76.2162	25	0	0	0	0.0132426	0	9.47925e-12	0	1.30271e-17
ENSDARG00000074223	MDFIC	ENSMUSG00000041390	Mdfic	ortholog_one2one	47.8599	49.7976	75	17.12	0	0	0.0196429	0	0.00399112	0	1.95627e-06
ENSDARG00000031698	mylk2	ENSMUSG00000027470	Mylk2	ortholog_one2one	32.175	40.783	25	50.03	0	0	0.0227522	0	2.2382e-06	-0.381002	0.172266
ENSDARG00000058011	arxa	ENSMUSG00000035277	Arx	ortholog_one2many	68.2119	54.7872	25	57.17	0	0	0.0293746	0	1	0	1
ENSDARG00000079947	gfi1b	ENSMUSG00000026815	Gfi1b	ortholog_one2one	57.1856	52.6171	25	1.69	0	0	0.0351189	0	0.0011002	0	2.2792e-11
ENSDARG00000007406	phox2a	ENSMUSG00000007946	Phox2a	ortholog_one2one	66.4286	66.4286	50	55.45	0	0	0.0479975	0	0.388191	0	1
ENSDARG00000068910	nos1	ENSMUSG00000029361	Nos1	ortholog_one2one	74.144	74.2477	50	60.37	0	0	0.0513181	0	0.625296	0	1.29908e-08
ENSDARG00000098745	tfec	ENSMUSG00000029553	Tfec	ortholog_one2one	39.6313	54.2587	50	23.27	0	0	0.0577024	0	0.0603642	0	1
ENSDARG00000010029	spon1a	ENSMUSG00000038156	Spon1	ortholog_one2one	76.4851	76.5799	0	35.14	0	0	0.059911	0	0.000756486	0	1.74381e-14
ENSDARG00000059883	trpv1	ENSMUSG00000005952	Trpv1	ortholog_one2one	45.6654	44.5769	25	25.41	0	0	0.0724506	0	1	0	1
ENSDARG00000053362	cilp	ENSMUSG00000042254	Cilp	ortholog_one2one	62.3399	58.4	50	43.78	0	0	0.111063	0	1	0	1
ENSDARG00000101645	CABZ01077402.1	ENSMUSG00000034057	Myrfl	ortholog_one2one	48.2699	30.8628	25	77.48	0	0	0.15214	0	1.81421e-05	0.369115	0.153424
ENSDARG00000051923	ccnb1	ENSMUSG00000041431	Ccnb1	ortholog_one2one	63.2242	58.3721	50	42.28	0	0	0.173018	0	2.35139e-07	0	1.61864e-05
ENSDARG00000086158	ccbe1	ENSMUSG00000046318	Ccbe1	ortholog_one2one	63.8404	62.7451	25	73.2	0	0	0.187927	0	0.00623829	0	1
ENSDARG00000041864	capn3a	ENSMUSG00000079110	Capn3	ortholog_one2many	68.5517	60.5359	50	32.97	0	0	0.261731	0	0.749735	0	0.564248
ENSDARG00000043729	plac8.1	ENSMUSG00000029322	Plac8	ortholog_one2many	45.283	42.8571	50	0.55	0	0	0.299653	0	7.45918e-19	0	2.11573e-10
ENSDARG00000008278	rcor2	ENSMUSG00000024968	Rcor2	ortholog_one2one	58.209	59.6558	50	67.49	0	0	0.313786	0	3.04778e-06	0	1
ENSDARG00000079166	ace	ENSMUSG00000020681	Ace	ortholog_one2one	60.3474	60.8994	0	72.24	0	0	0.31385	0	0.75917	0	1
ENSDARG00000063635	nrxn1b	ENSMUSG00000024109	Nrxn1	ortholog_one2one	70.1017	68.6131	0	2.09	0	0	0.314027	0	9.34887e-17	0.00414985	1
ENSDARG00000017953	tp73	ENSMUSG00000029026	Trp73	ortholog_one2one	68.125	68.3386	50	23.26	0	0	0.318511	0	#N/A	0	#N/A
ENSDARG00000012788	foxa3	ENSMUSG00000040891	Foxa3	ortholog_one2one	44.6712	55.8074	0	100	0	0	0.34928	0	0.569107	0	0.990435
ENSDARG00000005574	vsx2	ENSMUSG00000021239	Vsx2	ortholog_one2one	69.3548	67.8947	25	28.83	0	0	0.365074	0	#N/A	0	#N/A
ENSDARG00000098856	RYR2	ENSMUSG00000021313	Ryr2	ortholog_one2one	80.8798	74.7886	50	32.81	0	0	0.368182	0	0.19786	0	0.312251
ENSDARG00000086616	cabz01093075.1	ENSMUSG00000079227	Ccr5	ortholog_many2many	33.5766	38.9831	25	44.79	0	0	0.421426	0	1	0	1
ENSDARG00000104618	grem1b	ENSMUSG00000074934	Grem1	ortholog_one2many	59.3137	65.7609	0	45.69	0	0	0.427605	0	1	0	5.26591e-06
ENSDARG00000079922	klf4	ENSMUSG00000003032	Klf4	ortholog_one2one	37.2159	27.1222	50	4.05	0	0	0.464429	0	0.115289	0	5.15559e-08
ENSDARG00000041699	piwil1	ENSMUSG00000029423	Piwil1	ortholog_one2one	65.6177	65.3132	25	55.96	0	0	0.479832	0	0.211373	0	0.215233
ENSDARG00000009438	myog	ENSMUSG00000026459	Myog	ortholog_one2one	48.0469	54.9107	50	42.85	0	0	0.500228	0	#N/A	0	#N/A
ENSDARG00000053558	rtkn2a	ENSMUSG00000037846	Rtkn2	ortholog_one2one	40.591	43.3555	50	15.39	0	0	0.540641	0	1.89318e-07	0	0.675155
ENSDARG00000071565	hnf4g	ENSMUSG00000017688	Hnf4g	ortholog_one2one	63.1808	69.378	50	1.5	0	0	0.644462	0	1	0	1
ENSDARG00000093401	crha	ENSMUSG00000049796	Crh	ortholog_one2many	36.7742	30.4813	25	0	0	0	0.647048	0	0.0544236	0	0.0552861
ENSDARG00000104387	slc4a5	ENSMUSG00000068323	Slc4a5	ortholog_one2many	67.6136	71.3287	0	12.95	0	0	0.656064	0	0.267679	0	0.149597
ENSDARG00000103752	DUSP26	ENSMUSG00000039661	Dusp26	ortholog_one2one	64.9746	60.6635	0	64.25	0	0	0.678332	0	0.000105137	0	4.83629e-13
ENSDARG00000103176	nr5a1a	ENSMUSG00000026751	Nr5a1	ortholog_one2many	57.0485	56.0606	25	0	0	0	0.694398	0	#N/A	0	#N/A
ENSDARG00000092060	tbx5b	ENSMUSG00000018263	Tbx5	ortholog_one2many	54.8837	45.5598	0	44.51	0	0	0.717566	0	#N/A	0	#N/A
ENSDARG00000103308	mst1	ENSMUSG00000032591	Mst1	ortholog_one2one	54.1608	53.6313	0	8.93	0	0	0.735388	0	2.86898e-05	0	0.877348
ENSDARG00000008986	e2f7	ENSMUSG00000020185	E2f7	ortholog_one2one	43.1535	34.5133	50	40.27	0	0	0.798451	0	0.00677364	0	0.8996
ENSDARG00000038672	tcf7	ENSMUSG00000000782	Tcf7	ortholog_one2one	44.7887	52.4752	100	23.49	0	0	0.809196	0	5.05838e-10	0	0.000938748
ENSDARG00000040621	lrrc32	ENSMUSG00000090958	Lrrc32	ortholog_one2one	38.9985	38.7632	25	83.06	0	0	0.818551	0	0.000153872	0	1
ENSDARG00000017240	traf5	ENSMUSG00000026637	Traf5	ortholog_one2one	40.8203	37.8623	25	22.95	0	0	0.848986	0	4.20854e-14	0	0.919735
ENSDARG00000045089	si:ch211-270n8.1	ENSMUSG00000037942	Crp	ortholog_one2many	21.5686	24.4444	50	0	0	0	0.89804	0	1	0	1
ENSDARG00000075621	birc5a	ENSMUSG00000017716	Birc5	ortholog_one2one	37.3684	50.7143	50	15.31	0	0	0.94389	0	2.56387e-06	0	2.31921e-08
ENSDARG00000022569	nkx6.1	ENSMUSG00000035187	Nkx6-1	ortholog_one2one	81.0897	69.3151	50	45.27	0	0	0.94569	0	0.00665467	0	1.24145e-09
ENSDARG00000075928	hivep3a	ENSMUSG00000028634	Hivep3	ortholog_one2many	34.2794	26.2351	25	1.8	0	0	0.958382	0	1.08225e-08	0	0.00394274
ENSDARG00000055133	cenpf	ENSMUSG00000026605	Cenpf	ortholog_one2one	29.5421	26.6934	75	90.82	0	0	0.964523	0	7.07866e-06	0	2.16258e-08
ENSDARG00000011072	ddx11	ENSMUSG00000035842	Ddx11	ortholog_one2one	55.9551	56.5909	0	47.21	0	0	0.98739	0	2.03817e-13	0	0.397048
ENSDARG00000090664	moto	ENSMUSG00000051455	Meioc	ortholog_one2one	29.3772	25.9067	50	5.37	0	0	0.993717	0	0.0138056	0	1
ENSDARG00000035415	ptger4b	ENSMUSG00000039942	Ptger4	ortholog_one2many	57.1429	55.3606	25	13.31	0	0	0.994917	0	0.00282273	0	2.22286e-08
ENSDARG00000042370	ptafr	ENSMUSG00000056529	Ptafr	ortholog_one2one	41.0959	43.9883	0	84.79	0	0	1	0	5.92369e-10	0	1
ENSDARG00000070930	cart1	ENSMUSG00000021647	Cartpt	ortholog_one2many	56.3636	48.062	0	0	0	0	1	0	0.00503022	0	0.000733203
ENSDARG00000022767	apobb.1	ENSMUSG00000020609	Apob	ortholog_one2many	28.5791	23.6626	0	0.3	0	0	1	0	1	0	1
ENSDARG00000103727	TFR2	ENSMUSG00000029716	Tfr2	ortholog_one2one	39.7172	38.7218	0	8.5	0	0	1	0	0.0978096	0	0.0805377
ENSDARG00000098502	egr2a	ENSMUSG00000037868	Egr2	ortholog_one2many	66.5323	35.1064	50	0	0	0	1	0	0.459479	0	3.69347e-14
ENSDARG00000078676	myrf	ENSMUSG00000036098	Myrf	ortholog_one2one	63.7437	33.9928	25	4.72	0	0	1	0	0.334078	0	0.205657
ENSDARG00000014722	her1	ENSMUSG00000023781	Hes7	ortholog_one2many	20.7317	30.2222	0	0	0	0	1	0	0.0129622	-1.72465	0.0359564
ENSDARG00000024503	c6ast3	ENSMUSG00000050468	Astl	ortholog_one2many	36.0784	21.1494	25	1.58	0	0	1	0	1	0	1
ENSDARG00000015068	txk	ENSMUSG00000054892	Txk	ortholog_one2one	61.9403	47.2486	0	1.85	0	0	1	0	0.714855	0	0.726623
ENSDARG00000036974	ripply3	ENSMUSG00000022941	Ripply3	ortholog_one2one	44.5455	32.2368	50	0	0	0	1	0	0.251892	0	0.483599
ENSDARG00000008133	foxl1	ENSMUSG00000097084	Foxl1	ortholog_one2one	41.1111	44.0476	0	43.38	0	0	1	0	0.000277889	0	0.549642
ENSDARG00000037916	cdk5r1a	ENSMUSG00000048895	Cdk5r1	ortholog_one2many	66.0131	65.798	25	0	0	0	1	0	0.298314	0	0.0327857
ENSDARG00000055750	foxp3a	ENSMUSG00000039521	Foxp3	ortholog_one2many	23.4286	19.1142	0	16.76	0	0	1	0	1	0	0.840473
ENSDARG00000054033	hoxb1b	ENSMUSG00000018973	Hoxb1	ortholog_one2many	43.6681	33.67	25	3.92	0	0	1	0	#N/A	0	#N/A
ENSDARG00000006911	wnt8b	ENSMUSG00000036961	Wnt8b	ortholog_one2one	79.0503	76.9022	0	37.78	0	0	1	0	0.855393	0	0.0140228
ENSDARG00000089181	adad1	ENSMUSG00000027719	Adad1	ortholog_one2one	48.2944	43.4572	50	68.87	0	0	1	0	0.12013	0	1
ENSDARG00000058961	ngfa	ENSMUSG00000027859	Ngf	ortholog_one2many	41.2017	31.2704	0	60.9	0	0	#N/A	0	1	0	1
ENSDARG00000010083	rbfox3a	ENSMUSG00000025576	Rbfox3	ortholog_one2one	69.437	69.2513	50	31.22	0	0	#N/A	0	0.997432	0	0.00426995
ENSDARG00000088795	engl	ENSMUSG00000026814	Eng	ortholog_one2one	14.1696	18.683	0	0	0	0	#N/A	0	3.65595e-07	0	1.18085e-15
ENSDARG00000086112	si:ch211-266i6.3	ENSMUSG00000037725	Ckap2	ortholog_one2one	22.459	20.6325	0	10.31	0	0	#N/A	0	0.239021	0	1
ENSDARG00000055359	sp100.1	ENSMUSG00000070031	Sp140	ortholog_many2many	19.3861	22.4719	50	0.12	0	0	#N/A	0	1.09576e-09	0	0.119775
ENSDARG00000068784	VSIR	ENSMUSG00000020101	Vsir	ortholog_one2one	37.0909	33.0097	0	0	0	0	#N/A	0	1.3417e-13	0	0.45141
ENSDARG00000015876	npas1	ENSMUSG00000001988	Npas1	ortholog_one2one	54.2735	42.7609	50	1.29	0	0	#N/A	0	0.59786	0	0.0173021
ENSDARG00000098439	nr1h3	ENSMUSG00000002108	Nr1h3	ortholog_one2one	68.4807	67.8652	25	5.24	0	0	#N/A	0	2.79234e-12	0	8.83878e-17
ENSDARG00000101933	CELF6	ENSMUSG00000032297	Celf6	ortholog_one2one	67.1233	63.913	0	15.24	0	0	#N/A	0	2.6189e-16	0	4.03905e-16
ENSDARG00000005271	zc3h12a	ENSMUSG00000042677	Zc3h12a	ortholog_one2many	59.9455	36.9128	50	27.88	0	0	#N/A	0	0.146846	0	0.69918
ENSDARG00000015674	msx3	ENSMUSG00000021469	Msx2	ortholog_one2one	46.8864	47.9401	0	0	0	0	#N/A	0	1.78345e-08	0	0.893187
ENSDARG00000075759	samd4a	ENSMUSG00000021838	Samd4	ortholog_one2one	68.7591	66.2447	50	34.51	0	0	#N/A	0	0.21725	0	5.77091e-14
ENSDARG00000091603	CABZ01066696.1	ENSMUSG00000034041	Lyl1	ortholog_one2one	26.4631	37.4101	0	20.67	0	0	#N/A	0	0.253508	0	1
ENSDARG00000007358	cxcr3.1	ENSMUSG00000050232	Cxcr3	ortholog_one2one	39.782	39.782	0	0	0	0	#N/A	0	1	0	1
ENSDARG00000074016	ptgfr	ENSMUSG00000028036	Ptgfr	ortholog_one2one	44.8718	47.8142	0	80.13	0	0	#N/A	0	1	0	2.01427e-13
ENSDARG00000021336	pax4	ENSMUSG00000029706	Pax4	ortholog_one2one	35.1801	36.3897	25	4.63	0	0	#N/A	0	#N/A	0	#N/A
ENSDARG00000097785	CR762436.3	ENSMUSG00000101355	Hist1h3h	ortholog_many2many	99.2647	99.2647	0	0	0	0	#N/A	0	1	0	0.288858
ENSDARG00000056395	onecut3a	ENSMUSG00000045518	Onecut3	ortholog_one2many	64.574	58.7755	25	0.16	0	0	#N/A	0	1	0	1
ENSDARG00000090904	RNF219	ENSMUSG00000022120	Rnf219	ortholog_one2one	43.1985	32.5485	50	22.91	0	0	0.203668	0.0148982	0.973736	0.150458	0.142024
ENSDARG00000074910	crtc2	ENSMUSG00000027936	Crtc2	ortholog_one2one	29.1173	31.9364	25	0	0	0	#N/A	0.0233711	0.820871	-0.252043	0.00108265
ENSDARG00000079631	si:ch211-113e8.10	ENSMUSG00000024695	Zfp91	ortholog_one2one	29.5455	40.9091	0	3.18	0	0	#N/A	0.026748	0.804633	0.882308	1.49373e-10
ENSDARG00000016404	ptch1	ENSMUSG00000021466	Ptch1	ortholog_one2one	72.8413	68.8285	75	54.62	1	0	1	0.056795	0.859045	0.368719	0.0377544
ENSDARG00000006288	prdm5	ENSMUSG00000029913	Prdm5	ortholog_one2one	73.3438	77.6294	25	54.78	0	0	6.49192e-05	0.0717112	0.66179	0.631554	1.65247e-05
ENSDARG00000075165	zc3h6	ENSMUSG00000042851	Zc3h6	ortholog_one2many	28.062	15.3781	25	63.66	0	0	#N/A	0.0809962	0.731249	-0.00883706	1
ENSDARG00000013023	nsun3	ENSMUSG00000050312	Nsun3	ortholog_one2one	44.5333	47.9885	75	16.34	0	0	0.620034	0.0922803	0.608852	-3.22452	1.98754e-11
ENSDARG00000046024	pym1	ENSMUSG00000064030	Pym1	ortholog_one2one	56.1856	53.6946	0	75.74	1	0	#N/A	0.129569	0.73849	0.660345	0.0507534
ENSDARG00000005786	ppm1f	ENSMUSG00000026181	Ppm1f	ortholog_one2one	50.7075	47.5664	75	4.11	1	0	0.223881	0.152992	0.17935	0.544619	2.13835e-05
ENSDARG00000078378	unm_sa808	ENSMUSG00000026942	Traf2	ortholog_one2many	54.955	36.0236	0	39.15	0	0	#N/A	0.154877	0.0522103	-0.177015	0.0285372
ENSDARG00000098666	si:dkey-93h22.8	ENSMUSG00000055491	Pprc1	ortholog_one2many	28.0793	16.3625	0	1.29	0	0	#N/A	0.158447	0.430823	0.336934	0.0621539
ENSDARG00000105669	NFX1	ENSMUSG00000028423	Nfx1	ortholog_one2one	50.6925	49.2819	0	9.47	0	0	#N/A	0.166215	0.0572726	0.034198	0.761775
ENSDARG00000094280	usp21	ENSMUSG00000053483	Usp21	ortholog_one2one	50	35.689	0	5.31	0	0	0.526408	0.181722	0.00480646	0.580657	9.79605e-10
ENSDARG00000002582	tbx15	ENSMUSG00000027868	Tbx15	ortholog_one2one	77.9032	80.2326	100	74.48	1	0	1.08772e-09	0.186692	0.847441	2.25672	1.56682e-06
ENSDARG00000067719	wwtr1	ENSMUSG00000027803	Wwtr1	ortholog_one2one	62.5954	54.4248	50	83.47	1	0	0.000121405	0.188615	0.023846	-0.422617	1.97662e-05
ENSDARG00000077587	HIST2H3PS2	ENSMUSG00000099583	Hist1h3d	ortholog_one2one	100	100	0	50	0	0	#N/A	0.188797	1	-0.0670663	0.966106
ENSDARG00000021086	znf367	ENSMUSG00000044934	Zfp367	ortholog_one2one	69.9367	65	75	75.98	1	0	0.100257	0.189462	0.556111	0.612486	0.020456
ENSDARG00000100954	wars	ENSMUSG00000021266	Wars	ortholog_one2one	68.5897	44.4906	50	25.75	0	0	#N/A	0.194702	0.0480379	-0.584812	2.26818e-06
ENSDARG00000070843	arid3a	ENSMUSG00000019564	Arid3a	ortholog_one2one	56.8702	49.584	25	77.72	1	0	0.26195	0.200375	0.615256	-0.49273	0.268037
ENSDARG00000098868	XPO5	ENSMUSG00000067150	Xpo5	ortholog_one2one	60.4857	45.5149	0	71	0	0	0.000140199	0.20045	0.0885954	0.308888	0.00870879
ENSDARG00000075713	shox2	ENSMUSG00000027833	Shox2	ortholog_one2one	84.9498	76.7372	25	83.42	1	0	5.97681e-05	0.218245	0.5072	-0.0913431	0.850019
ENSDARG00000002220	zgc:103692	ENSMUSG00000026851	BC005624	ortholog_one2one	76.4706	76.4706	25	39.29	0	0	#N/A	0.228868	0.0162609	0.0400296	0.740108
ENSDARG00000061268	ago2	ENSMUSG00000036698	Ago2	ortholog_one2one	90.4926	91.8605	25	48.78	0	0	0.00579817	0.235658	0.0189648	0.314675	0.002091
ENSDARG00000016139	mkks	ENSMUSG00000027274	Mkks	ortholog_one2one	41.5631	41.0526	50	97.97	0	0	1	0.242268	0.0014235	0.468345	4.5781e-07
ENSDARG00000088087	kdm6ba	ENSMUSG00000018476	Kdm6b	ortholog_one2many	31.1809	32.663	75	18.02	0	0	#N/A	0.251916	0.392822	0.331966	0.253592
ENSDARG00000087832	bcl3	ENSMUSG00000053175	Bcl3	ortholog_one2one	31.1793	43.0804	0	0	0	0	0.000263353	0.2776	0.338123	-0.987093	0.00512323
ENSDARG00000076679	rai1	ENSMUSG00000062115	Rai1	ortholog_one2one	21.3437	21.8634	50	36.58	0	0	#N/A	0.282602	0.032095	0.0710258	0.662142
ENSDARG00000075533	zbtb24	ENSMUSG00000019826	Zbtb24	ortholog_one2one	44.8378	42.8169	0	55.54	0	0	0.310404	0.296343	0.000492941	0.650221	8.54431e-09
ENSDARG00000037892	psmc3ip	ENSMUSG00000019303	Psmc3ip	ortholog_one2one	66.1972	64.977	75	79.41	1	0	5.79769e-09	0.300988	0.304726	-0.838569	0.0311875
ENSDARG00000074111	bcdin3d	ENSMUSG00000037525	Bcdin3d	ortholog_one2one	51.3636	39.6491	0	18.59	0	0	0.984117	0.318147	0.0375253	0.29535	0.0596486
ENSDARG00000030616	nfe2l1a	ENSMUSG00000038615	Nfe2l1	ortholog_one2one	44.2716	42.2402	75	0	0	0	1	0.321147	1.79271e-05	0.101867	0.114032
ENSDARG00000006837	mycn	ENSMUSG00000037169	Mycn	ortholog_one2many	44.5328	48.4848	50	70.22	0	0	0.119805	0.341906	0.000274311	0.0221184	0.866581
ENSDARG00000105498	TSC22D3	ENSMUSG00000031431	Tsc22d3	ortholog_one2many	70.5314	72.6368	25	96.87	1	0	#N/A	0.408918	0.00873651	1.32914	3.20786e-09
ENSDARG00000105619	si:ch73-211e3.1	ENSMUSG00000059401	Mamld1	ortholog_one2one	20.197	10.2117	50	0	0	0	#N/A	0.421356	0.00822457	2.15417	1.45127e-14
ENSDARG00000087937	cdk4	ENSMUSG00000006728	Cdk4	ortholog_one2one	72.4832	71.2871	0	48.7	0	0	0.0509122	0.430368	0.13881	0.153186	0.618583
ENSDARG00000087536	znf407	ENSMUSG00000048410	Zfp407	ortholog_one2one	44.6364	27.6046	0	61.55	0	0	5.40203e-06	0.440237	0.0109241	1.10625	4.73709e-08
ENSDARG00000101881	znf1097	ENSMUSG00000046897	Zfp740	ortholog_one2many	10.9034	19.4444	0	0	0	0	1	0.442603	1.02401e-09	0.390274	1.00192e-08
ENSDARG00000061373	znf142	ENSMUSG00000026135	Zfp142	ortholog_one2one	44.4951	37.0591	50	24.8	0	0	0.00219061	0.47277	0.0020068	0.716296	1.17139e-05
ENSDARG00000102483	wu:fb44b02	ENSMUSG00000066306	Numa1	ortholog_one2one	21.8367	25.5492	50	4.18	0	0	0.0599203	0.482932	1.16949e-10	0.74345	3.39506e-14
ENSDARG00000038561	klf6b	ENSMUSG00000000078	Klf6	ortholog_one2one	65.3061	50.3145	50	0	0	0	0.029853	0.499752	5.07577e-08	1.08836	2.87792e-14
ENSDARG00000043241	arrb1	ENSMUSG00000018909	Arrb1	ortholog_one2one	89.4737	89.4737	0	4.55	0	0	3.11172e-05	0.505328	2.23649e-06	1.17646	2.74459e-13
ENSDARG00000090020	zmp:0000000981	ENSMUSG00000044452	Zfp507	ortholog_one2many	27.8997	9.45802	50	0	0	0	#N/A	0.540214	0.00180793	0.695591	0.000106863
ENSDARG00000086523	erlin2	ENSMUSG00000031483	Erlin2	ortholog_one2many	78.852	76.7647	0	18.58	0	0	1	0.607451	6.68504e-14	0.180692	4.85209e-05
ENSDARG00000078388	glis2a	ENSMUSG00000014303	Glis2	ortholog_one2many	52.2422	44.7217	25	0	0	0	2.28716e-08	0.615828	0.000341991	0.0791184	0.746476
ENSDARG00000055162	zhx2a	ENSMUSG00000071757	Zhx2	ortholog_one2one	42.236	40.6699	25	84.26	0	0	#N/A	0.6265	0.000312362	0.207138	0.212334
ENSDARG00000004697	rxrgb	ENSMUSG00000015843	Rxrg	ortholog_one2one	72.5664	70.8423	0	67.36	0	0	8.9591e-06	0.634792	0.000519986	0.139307	0.447859
ENSDARG00000102267	znf750	ENSMUSG00000039238	Zfp750	ortholog_one2one	25.7002	22.1906	75	10.85	0	0	0.00146202	0.643454	0.000168394	0.417338	0.00978449
ENSDARG00000032808	tdrd7a	ENSMUSG00000035517	Tdrd7	ortholog_one2many	42.2614	40.7507	50	15.61	0	0	1	0.647022	3.56454e-16	0.565424	7.46026e-15
ENSDARG00000076251	irf3	ENSMUSG00000003184	Irf3	ortholog_one2one	27.9343	28.401	0	0	0	0	1	0.656265	2.25571e-08	0.557871	3.55356e-07
ENSDARG00000077215	eif4g3a	ENSMUSG00000028760	Eif4g3	ortholog_one2many	53.0588	57.161	50	4.61	0	0	#N/A	0.661675	4.08407e-10	0.392647	2.86791e-06
ENSDARG00000067591	puraa	ENSMUSG00000043991	Pura	ortholog_one2many	88.1533	78.8162	25	100	1	0	#N/A	0.684285	2.18169e-10	1.59308	8.53542e-18
ENSDARG00000061424	znf646	ENSMUSG00000049739	Zfp646	ortholog_one2many	25.4358	22.0358	25	10.62	0	0	#N/A	0.687906	1.43142e-05	0.992595	2.77169e-08
ENSDARG00000014098	pkd2	ENSMUSG00000034462	Pkd2	ortholog_one2one	64.823	60.6625	25	90.06	1	0	0.00266091	0.695895	7.41579e-12	0.391898	2.82845e-07
ENSDARG00000020046	ahr1a	ENSMUSG00000019256	Ahr	ortholog_one2one	39.2327	39.3789	0	51.48	0	0	1	0.69921	5.42157e-08	0.475243	2.19289e-05
ENSDARG00000100084	CABZ01084603.1	ENSMUSG00000035093	Secisbp2l	ortholog_one2one	44.7791	20.4775	25	23.87	0	0	1.26277e-06	0.707782	2.53698e-06	0.935741	3.06785e-08
ENSDARG00000105370	znf628	ENSMUSG00000074406	Zfp628	ortholog_one2many	25.7544	35.3565	25	32.66	0	0	#N/A	0.721993	0.158776	0.162196	0.863159
ENSDARG00000014179	pfkma	ENSMUSG00000033065	Pfkm	ortholog_one2many	77.1684	77.5641	25	34.27	0	0	7.22011e-05	0.734676	3.22178e-06	-0.203053	0.126768
ENSDARG00000094332	vgll4a	ENSMUSG00000030315	Vgll4	ortholog_one2many	67.3077	48.7805	25	0	0	0	0.00260522	0.738585	2.21279e-12	0.994935	7.62377e-15
ENSDARG00000008119	si:ch211-195d17.2	ENSMUSG00000057469	E2f6	ortholog_one2one	26.8116	40.8088	0	0	0	0	#N/A	0.740468	6.19648e-11	0.284586	0.00017361
ENSDARG00000052351	si:dkey-156n14.3	ENSMUSG00000034430	Zxdc	ortholog_one2many	29.0008	41.6084	25	16.49	0	0	#N/A	0.747895	4.89112e-06	0.463311	0.0018694
ENSDARG00000004301	rhogb	ENSMUSG00000073982	Rhog	ortholog_one2many	80.1047	80.1047	50	100	1	0	4.81796e-05	0.753394	1.29108e-08	-0.209316	0.0291541
ENSDARG00000017494	tgfbr1a	ENSMUSG00000007613	Tgfbr1	ortholog_one2many	79.604	79.9205	25	0	0	0	3.34777e-07	0.775836	2.22133e-07	1.45417	1.19942e-12
ENSDARG00000058372	mcph1	ENSMUSG00000039842	Mcph1	ortholog_one2one	45.7883	25.7908	25	22.89	0	0	0.186452	0.791977	2.16789e-05	-0.938523	0.000278594
ENSDARG00000058995	jmjd4	ENSMUSG00000036819	Jmjd4	ortholog_one2one	51.6588	51.0539	50	86.42	1	0	0.00343241	0.80549	4.53319e-06	-0.0437242	0.897058
ENSDARG00000045444	fzd8a	ENSMUSG00000036904	Fzd8	ortholog_one2many	73.7847	62.0438	50	52.56	0	0	1.14388e-08	0.810983	2.2789e-06	0.846302	1.24459e-06
ENSDARG00000062204	sigirr	ENSMUSG00000025494	Sigirr	ortholog_one2one	44.1315	45.9658	25	26.47	0	0	1.29196e-10	0.812163	2.39019e-05	0.717868	0.000110453
ENSDARG00000078324	PRDM16	ENSMUSG00000039410	Prdm16	ortholog_one2one	66.0247	67.2157	0	95.39	1	0	0.0244478	0.819907	0.000215744	0	0.000835763
ENSDARG00000102651	GTPBP2 (1 of many)	ENSMUSG00000023952	Gtpbp2	ortholog_one2many	78.5124	78.9037	0	2.65	0	0	#N/A	0.827672	4.79635e-08	-0.80907	1.43325e-06
ENSDARG00000105179	HDAC7	ENSMUSG00000022475	Hdac7	ortholog_one2one	46.3022	45.3305	0	19.44	0	0	#N/A	0.830977	1.1277e-06	0.531926	0.000560649
ENSDARG00000074371	tirap	ENSMUSG00000032041	Tirap	ortholog_one2one	36.7257	33.3333	25	6.95	0	0	0.00373198	0.840881	6.41149e-11	0.429568	5.88716e-06
ENSDARG00000069482	traf1	ENSMUSG00000026875	Traf1	ortholog_one2one	34.4828	46.4548	25	0	0	0	0.0251839	0.895069	0.000983342	1.29166	4.50283e-06
ENSDARG00000060578	si:dkey-226m8.10	ENSMUSG00000032187	Smarca4	ortholog_one2one	42.5373	7.05009	0	0	0	0	#N/A	0.921662	3.02528e-09	0.784053	5.17426e-08
ENSDARG00000096428	si:dkey-217d24.6	ENSMUSG00000024050	Wiz	ortholog_one2many	22.2111	23.1172	50	0.99	0	0	#N/A	0.956439	8.29811e-08	0.413611	0.00556092
ENSDARG00000103337	rrp1	ENSMUSG00000058392	Rrp1b	ortholog_one2many	31.0448	28.7293	0	8.84	0	0	#N/A	0.972167	8.20577e-07	-0.0250745	0.966746
ENSDARG00000052881	dnajb5	ENSMUSG00000036052	Dnajb5	ortholog_one2one	75.8333	78.4483	50	28.13	0	0	0.0256119	0.978363	0.0245044	0.0531267	1
ENSDARG00000007097	her13	ENSMUSG00000067071	Hes6	ortholog_one2many	49.115	49.5536	0	0	0	0	1	0.979023	3.55411e-07	0.405682	0.00855468
ENSDARG00000003153	nudt21	ENSMUSG00000031754	Nudt21	ortholog_one2one	97.3684	97.7974	0	100	1	0	#N/A	0.981054	6.90002e-12	0.00145315	1
ENSDARG00000077095	HIPK1 (1 of many)	ENSMUSG00000008730	Hipk1	ortholog_one2many	56.7616	52.7273	0	11.14	0	0	#N/A	0.996501	9.03615e-12	1.39483	1.16679e-14
ENSDARG00000026577	cdk2	ENSMUSG00000025358	Cdk2	ortholog_one2one	90.9396	78.3237	0	100	1	0	3.18458e-06	1.01209	1.80925e-07	1.17896	1.26225e-08
ENSDARG00000032199	gpc3	ENSMUSG00000055653	Gpc3	ortholog_one2one	40.8475	41.6235	75	0.21	0	0	9.92354e-07	1.0164	0.0705097	1.96848	0.000165011
ENSDARG00000059556	recql5	ENSMUSG00000020752	Recql5	ortholog_one2one	48.1243	45.723	0	68.38	0	0	#N/A	1.03582	3.20997e-08	1.01765	4.29435e-08
ENSDARG00000006409	mapk12b	ENSMUSG00000022610	Mapk12	ortholog_one2many	69.9725	69.2098	25	62.62	0	0	1	1.04766	8.74656e-09	1.23152	4.89958e-10
ENSDARG00000005629	smyd2b	ENSMUSG00000026603	Smyd2	ortholog_one2many	62.4714	63.0485	25	0	0	0	0.00799164	1.06853	4.43199e-10	0.359357	0.0020262
ENSDARG00000098867	PRDM15	ENSMUSG00000014039	Prdm15	ortholog_one2one	61.2031	59.7956	25	48.47	0	0	0.431484	1.07067	3.3463e-07	1.23767	1.85214e-08
ENSDARG00000078717	itga8	ENSMUSG00000026768	Itga8	ortholog_one2one	61.3787	61.2053	25	61.87	0	0	0.01328	1.07202	2.97899e-07	2.43438	1.44733e-15
ENSDARG00000079738	znf219	ENSMUSG00000049295	Zfp219	ortholog_one2one	23.9269	36.0882	0	56.91	0	0	2.12933e-07	1.08271	1.28237e-09	0.440587	0.000646895
ENSDARG00000059933	plpp3	ENSMUSG00000028517	Plpp3	ortholog_one2one	70.8333	70.8333	25	34.32	0	0	#N/A	1.09604	1.28687e-16	1.46815	6.272e-19
ENSDARG00000025820	chek2	ENSMUSG00000029521	Chek2	ortholog_one2one	51.8887	47.8022	25	37.51	0	0	0.159928	1.1021	0.0311815	1.37243	0.00412334
ENSDARG00000061974	grhl2b	ENSMUSG00000022286	Grhl2	ortholog_one2many	62.0573	58.88	75	74.34	1	0	0.353895	1.10741	7.62029e-14	1.05036	2.95309e-13
ENSDARG00000062997	hyal2b	ENSMUSG00000010047	Hyal2	ortholog_one2many	44.6	47.1459	50	28.96	0	0	8.01393e-07	1.10984	1.58214e-12	0.560005	3.29427e-07
ENSDARG00000038709	MYADM (1 of many)	ENSMUSG00000068566	Myadm	ortholog_one2many	46.9388	43.125	0	0	0	0	1	1.11711	1.18527e-08	0.343865	0.0147683
ENSDARG00000104713	zgc:165653	ENSMUSG00000031328	Flna	ortholog_one2one	26.4901	1.51573	0	0	0	0	0.0031929	1.13814	2.08835e-10	0.411942	0.00129901
ENSDARG00000052739	egf	ENSMUSG00000028017	Egf	ortholog_one2one	37.2133	35.9901	50	1.79	0	0	1	1.17323	1.20308e-20	1.16951	2.57142e-20
ENSDARG00000055798	heyl	ENSMUSG00000032744	Heyl	ortholog_one2one	43.2258	41.1043	0	24.85	0	0	5.57559e-07	1.17419	9.78678e-19	0.530893	7.70838e-12
ENSDARG00000102260	TMPRSS6	ENSMUSG00000016942	Tmprss6	ortholog_one2one	46.4646	45.3761	0	9.71	0	0	1	1.18923	1.99976e-14	0.700176	6.15861e-10
ENSDARG00000090340	si:dkey-27o4.1	ENSMUSG00000042377	Fam83g	ortholog_one2many	17.5396	35.468	75	3.55	0	0	0.426942	1.25295	3.06461e-09	-0.502487	0.018513
ENSDARG00000090625	si:ch73-248e21.1	ENSMUSG00000003190	Bcl2l12	ortholog_one2one	20.8877	31.3725	0	0	0	0	#N/A	1.25761	2.73171e-07	0.833127	0.000146526
ENSDARG00000040076	pycard	ENSMUSG00000030793	Pycard	ortholog_one2one	28.0788	29.5337	0	0	0	0	4.85581e-07	1.28439	1.47761e-10	0.365072	0.00833698
ENSDARG00000039616	cenpk	ENSMUSG00000021714	Cenpk	ortholog_one2one	35.2727	31.6993	0	9.08	0	0	5.55579e-06	1.30392	0.0159314	-0.471343	0.647604
ENSDARG00000011094	ccna2	ENSMUSG00000027715	Ccna2	ortholog_one2one	58.8785	59.7156	25	14.91	0	0	0.000387572	1.33201	2.1887e-05	0.101359	0.859001
ENSDARG00000026335	susd4	ENSMUSG00000038576	Susd4	ortholog_one2one	51.2397	50.6122	0	26.7	0	0	0.00320357	1.36913	0.0177136	0.785459	0.208647
ENSDARG00000027087	tgfb2	ENSMUSG00000039239	Tgfb2	ortholog_one2one	78.6925	73.5294	25	99.72	1	0	1.16949e-07	1.4286	7.38884e-24	1.39528	4.1215e-23
ENSDARG00000005834	gatad2b	ENSMUSG00000042390	Gatad2b	ortholog_one2one	67.2334	73.2323	25	95.77	1	0	0.0708599	1.46229	1.50753e-06	2.47442	3.0917e-12
ENSDARG00000010515	dvl1a	ENSMUSG00000029071	Dvl1	ortholog_one2many	86.6667	14.964	75	0	1	0	0.00655323	1.46466	1.52722e-12	1.15081	1.94525e-10
ENSDARG00000029069	tnni2a.4	ENSMUSG00000031097	Tnni2	ortholog_one2many	56.25	54.3956	25	0	0	0	1	1.46791	0.00337068	0.369938	0.629539
ENSDARG00000024759	inhbab	ENSMUSG00000041324	Inhba	ortholog_one2many	58.7654	56.1321	25	96.02	1	0	3.66409e-05	1.514	7.40895e-15	0.637345	8.57836e-08
ENSDARG00000067829	ppargc1a	ENSMUSG00000029167	Ppargc1a	ortholog_one2one	51.5464	56.4617	100	93.39	1	0	2.97674e-05	1.5635	2.35274e-10	1.75314	2.15808e-11
ENSDARG00000061549	foxo1b	ENSMUSG00000044167	Foxo1	ortholog_one2many	57.8221	57.8221	25	30.63	0	0	0.462537	1.57573	6.00006e-11	1.03555	1.81766e-07
ENSDARG00000074321	tead3a	ENSMUSG00000002249	Tead3	ortholog_one2many	80.9291	71.1828	25	38.85	0	0	0.000257105	1.60526	0.000100673	1.49672	0.00031184
ENSDARG00000061941	trpv4	ENSMUSG00000014158	Trpv4	ortholog_one2one	70.0815	69.116	100	27.09	1	0	0.00740359	1.61605	3.4662e-17	1.28578	5.77917e-15
ENSDARG00000079233	E2F2	ENSMUSG00000018983	E2f2	ortholog_one2one	51.5982	51.0158	50	9.43	0	0	0.00801414	1.61806	0.000138177	1.98315	2.78219e-06
ENSDARG00000037895	ramp2	ENSMUSG00000001240	Ramp2	ortholog_one2one	20.3883	22.2222	50	0	0	0	6.46447e-09	1.62596	0.000199576	2.41785	3.87856e-08
ENSDARG00000079402	tapbp.1	ENSMUSG00000024308	Tapbp	ortholog_one2many	27.6018	26.1803	25	4.1	0	0	#N/A	1.6288	1.39701e-12	0.891598	7.86178e-08
ENSDARG00000079191	zgc:172122	ENSMUSG00000022661	Cd200	ortholog_one2many	15.5313	20.5036	0	0	0	0	#N/A	1.66971	1.93692e-22	0.882009	1.59423e-16
ENSDARG00000105261	nfkb1	ENSMUSG00000028163	Nfkb1	ortholog_one2one	53.8889	29.9691	0	0.8	0	0	0.0281919	1.67924	5.25195e-13	1.02283	1.65563e-08
ENSDARG00000074501	tnip2	ENSMUSG00000059866	Tnip2	ortholog_one2one	30.8036	32.093	25	0	0	0	3.85418e-05	1.69998	2.97107e-11	-0.140138	0.41752
ENSDARG00000074056	kctd1	ENSMUSG00000036225	Kctd1	ortholog_one2one	81.5498	25.6678	100	30.58	1	0	8.23989e-05	1.73918	2.27943e-06	2.35895	8.41986e-10
ENSDARG00000104348	fgf2	ENSMUSG00000037225	Fgf2	ortholog_one2one	72.0779	72.0779	50	70.24	0	0	0.024451	1.73933	0.0207212	0.810022	0.450104
ENSDARG00000031761	dab2	ENSMUSG00000022150	Dab2	ortholog_one2many	43.2937	33.2898	0	35.36	0	0	4.1242e-07	1.75207	7.77506e-09	2.48488	1.02464e-12
ENSDARG00000052387	pou2f3	ENSMUSG00000032015	Pou2f3	ortholog_one2one	64.7355	59.6288	25	7.1	0	0	1	1.78641	0.000667342	3.56261	5.82547e-12
ENSDARG00000089892	cd44b	ENSMUSG00000005087	Cd44	ortholog_one2one	21.9753	11.4103	75	0	0	0	0.748551	1.81107	1.82127e-20	1.08372	1.05277e-15
ENSDARG00000071208	wnt4a	ENSMUSG00000036856	Wnt4	ortholog_one2one	81.8182	82.0513	25	36.87	0	0	1.00731e-08	1.81895	6.21286e-08	0.83556	0.0131514
ENSDARG00000102687	MINOS1-NBL1	ENSMUSG00000041120	Nbl1	ortholog_one2one	48.0874	49.4382	0	62.71	0	0	6.80341e-11	1.86871	2.29632e-20	2.96169	4.37532e-24
ENSDARG00000039577	ptk2bb	ENSMUSG00000059456	Ptk2b	ortholog_one2many	58.4661	58.1764	25	1.85	0	0	1.04798e-08	1.875	1.04745e-15	0.863657	1.07335e-08
ENSDARG00000090997	vegfba	ENSMUSG00000024962	Vegfb	ortholog_one2many	22.3577	26.57	25	18.26	0	0	#N/A	1.95362	1.18358e-10	1.00808	7.98699e-06
ENSDARG00000006848	PARP9	ENSMUSG00000022906	Parp9	ortholog_one2one	30	30.3614	25	34.08	0	0	1.18034e-07	1.95619	1.25021e-12	0.163079	0.381827
ENSDARG00000043586	fas	ENSMUSG00000024778	Fas	ortholog_one2one	24.183	22.63	0	0	0	0	9.91338e-08	2.00643	2.28162e-07	-0.962306	0.0691494
ENSDARG00000022813	dnd1	ENSMUSG00000044595	Dnd1	ortholog_one2one	31.1436	36.3636	0	71.06	0	0	#N/A	2.01153	7.84976e-09	1.62875	1.27635e-06
ENSDARG00000086825	znf521	ENSMUSG00000024420	Zfp521	ortholog_one2many	38.2863	26.926	50	0	0	0	#N/A	2.02034	1.14146e-18	1.23138	6.47176e-14
ENSDARG00000059743	tmem98	ENSMUSG00000035413	Tmem98	ortholog_one2one	83.6364	81.4159	0	95.44	1	0	0.000456731	2.03042	1.28536e-08	0.880872	0.00115682
ENSDARG00000104973	wnt5a	ENSMUSG00000021994	Wnt5a	ortholog_one2one	73.262	72.1053	25	60.8	0	0	5.15197e-05	2.11503	1.18452e-19	1.88707	2.75967e-18
ENSDARG00000059363	tgfbr2a	ENSMUSG00000032440	Tgfbr2	ortholog_one2many	48.062	52.3649	0	3.77	0	0	#N/A	2.14775	1.39042e-16	2.69354	8.84397e-19
ENSDARG00000102525	lck	ENSMUSG00000000409	Lck	ortholog_one2one	70.1789	67.8846	25	0.3	0	0	0.000377262	2.16956	3.08365e-08	1.01685	0.00893813
ENSDARG00000006202	erbb3a	ENSMUSG00000018166	Erbb3	ortholog_one2many	48.8873	52.5019	25	13.53	0	0	0.0036422	2.17299	4.79168e-12	2.08297	1.38263e-11
ENSDARG00000099979	tgfbr3	ENSMUSG00000029287	Tgfbr3	ortholog_one2one	48.9387	48.8235	50	33.35	0	0	9.01551e-09	2.20116	1.63236e-17	1.52839	7.9016e-14
ENSDARG00000030133	fkbp6	ENSMUSG00000040013	Fkbp6	ortholog_one2many	46.0641	48.318	25	8.59	0	0	8.91508e-09	2.20679	3.42141e-08	2.77544	9.70923e-11
ENSDARG00000028027	trim63a	ENSMUSG00000028834	Trim63	ortholog_one2many	51.5942	50.1408	0	42.59	0	0	3.87125e-05	2.21239	7.6408e-06	0	0.0768361
ENSDARG00000039563	loxl3b	ENSMUSG00000000693	Loxl3	ortholog_one2many	63.9405	68.435	0	60.96	0	0	8.68561e-09	2.27825	6.11411e-11	0	0.00175977
ENSDARG00000079291	rapgef3	ENSMUSG00000022469	Rapgef3	ortholog_one2one	55.4787	51.9438	25	29.82	0	0	1.28946e-05	2.34382	1.58272e-18	3.54633	9.68182e-23
ENSDARG00000054031	mxd4	ENSMUSG00000037235	Mxd4	ortholog_one2one	72.9469	72.2488	0	87.38	1	0	1.09051e-05	2.35955	1.57193e-20	1.38021	1.61202e-15
ENSDARG00000045580	lum	ENSMUSG00000036446	Lum	ortholog_one2one	44.086	48.5207	100	25.64	0	0	9.58106e-12	2.42103	2.52263e-23	0.763758	3.24945e-13
ENSDARG00000003732	mitfa	ENSMUSG00000035158	Mitf	ortholog_one2many	65.6	62.3574	100	56.81	1	0	0.636387	2.50023	1.12107e-11	2.26807	2.30664e-10
ENSDARG00000087646	runx1	ENSMUSG00000022952	Runx1	ortholog_one2one	81.2081	26.0215	0	1.08	0	0	#N/A	2.5222	1.8947e-19	0.797645	2.95915e-07
ENSDARG00000105491	arhgef5	ENSMUSG00000033542	Arhgef5	ortholog_one2one	22.6326	21.3156	0	3.4	0	0	#N/A	2.54744	1.9961e-17	1.88626	5.08311e-14
ENSDARG00000087195	rorc	ENSMUSG00000028150	Rorc	ortholog_one2one	41.9608	20.7364	50	8.48	0	0	0.621485	2.55249	4.74239e-21	0.453929	2.51815e-06
ENSDARG00000058053	serping1	ENSMUSG00000023224	Serping1	ortholog_one2one	24.1722	28.9683	0	0	0	0	0.000220175	2.61191	5.37213e-13	3.83662	8.62474e-17
ENSDARG00000008107	src	ENSMUSG00000027646	Src	ortholog_one2one	83.1461	82.0702	0	86.08	1	0	3.02644e-05	2.623	5.50503e-12	2.34597	1.71329e-10
ENSDARG00000103607	wtip	ENSMUSG00000036459	Wtip	ortholog_one2one	35.9568	58.5427	0	39.68	0	0	0.12719	2.73662	5.97224e-15	1.47286	5.14111e-09
ENSDARG00000069105	fgfr4	ENSMUSG00000005320	Fgfr4	ortholog_one2one	54.2795	62.7034	0	20.7	0	0	0.0106083	2.75562	2.15506e-13	0.833867	0.00716704
ENSDARG00000060081	crb2b	ENSMUSG00000035403	Crb2	ortholog_one2many	35.266	40.3276	25	4.56	0	0	2.10824e-06	2.85658	8.0352e-21	0.61087	3.56851e-06
ENSDARG00000100693	ddr2a	ENSMUSG00000026674	Ddr2	ortholog_one2one	76.4977	77.7518	75	2.88	1	0	0.000157243	3.01508	2.31531e-11	4.5965	2.91294e-18
ENSDARG00000098669	exd1	ENSMUSG00000048647	Exd1	ortholog_one2one	38.0328	20.3509	0	0	0	0	1.6524e-10	3.03261	5.88208e-10	2.9143	2.0228e-09
ENSDARG00000091058	tmem173	ENSMUSG00000024349	Tmem173	ortholog_one2one	31.407	33.0688	0	0	0	0	0.00424407	3.07475	2.04151e-08	3.69229	3.75703e-11
ENSDARG00000054438	fzd2	ENSMUSG00000050288	Fzd2	ortholog_one2one	78.5455	75.7895	0	0	0	0	5.33508e-09	3.19362	2.22931e-20	1.85989	3.03498e-14
ENSDARG00000097592	si:dkey-40c23.1	ENSMUSG00000049502	Dtx3l	ortholog_one2one	13.2841	9.62567	0	1.17	0	0	0.00363249	3.22626	6.30517e-16	2.47963	1.46699e-12
ENSDARG00000075217	tdrd12	ENSMUSG00000030491	Tdrd12	ortholog_one2one	3.51035	9.58231	0	5.21	0	0	0.991986	3.27822	1.16448e-27	0.902677	5.45947e-16
ENSDARG00000055271	nkd2b	ENSMUSG00000021567	Nkd2	ortholog_one2many	45.9658	40.7809	50	3.64	0	0	3.72243e-07	3.47348	3.50761e-13	3.38578	1.10147e-12
ENSDARG00000042811	fgf1b	ENSMUSG00000036585	Fgf1	ortholog_one2many	52.9412	34.8387	0	3.1	0	0	0.00265208	3.51729	1.28945e-18	2.26559	3.63226e-14
ENSDARG00000088168	ablim3	ENSMUSG00000032735	Ablim3	ortholog_one2one	74.6706	74.7801	75	1.8	1	0	0.000190547	3.59925	1.11692e-14	2.16462	4.36819e-09
ENSDARG00000022048	tlr4bb	ENSMUSG00000039005	Tlr4	ortholog_one2many	37.8676	37.006	25	21.82	0	0	1	3.64172	1.53225e-16	0	0.00414471
ENSDARG00000069463	alox12	ENSMUSG00000000320	Alox12	ortholog_one2many	46.5672	47.0588	50	18.35	0	0	1.35064e-05	3.68591	6.7757e-22	2.4192	2.24202e-17
ENSDARG00000006257	vldlr	ENSMUSG00000024924	Vldlr	ortholog_one2one	71.4964	68.9576	50	89.37	1	0	0.00113647	4.44027	4.66526e-16	1.69813	2.95968e-07
ENSDARG00000087110	akna	ENSMUSG00000039158	Akna	ortholog_one2one	21.9697	22.7208	25	1.08	0	0	2.50657e-06	4.50892	1.20569e-20	2.45486	1.82784e-11
ENSDARG00000011818	batf	ENSMUSG00000034266	Batf	ortholog_one2one	61.2903	60.8	50	91.69	1	0	0.112357	4.65607	1.45295e-16	0	0.0139052
ENSDARG00000089216	zmp:0000001268	ENSMUSG00000062329	Cytl1	ortholog_one2one	21.6049	25.1799	0	0	0	0	#N/A	4.74673	4.18393e-21	6.90513	7.06263e-25
ENSDARG00000035695	scxa	ENSMUSG00000034161	Scx	ortholog_one2many	65.8291	63.285	50	50.45	0	0	4.80579e-11	5.23294	1.10318e-18	5.1023	4.04471e-18
ENSDARG00000025903	lgals9l1	ENSMUSG00000001123	Lgals9	ortholog_one2many	43.871	38.5269	25	1.08	0	0	3.09938e-06	6.25662	4.88318e-21	4.25221	9.97333e-16
ENSDARG00000052846	fsta	ENSMUSG00000021765	Fst	ortholog_one2many	72.2063	73.4694	50	39.01	0	0	8.35139e-07	7.49044	2.43043e-23	5.32703	3.20215e-18
ENSDARG00000101578	e2f4	ENSMUSG00000014859	E2f4	ortholog_one2one	65.099	64.1463	50	35.35	0	0.0041338	1	0.351805	0.00511712	0.234896	0.0534385
ENSDARG00000074995	eif2b5	ENSMUSG00000003235	Eif2b5	ortholog_one2one	63.047	54.2538	0	52.99	0	0.00716607	1	-0.347271	1.58166e-05	-0.470022	2.07351e-07
ENSDARG00000059483	tead1b	ENSMUSG00000055320	Tead1	ortholog_one2many	90.5263	78.8991	100	75.55	1	0.00794875	1	1.36106	1.30501e-06	1.37773	1.0767e-06
ENSDARG00000016302	upf1	ENSMUSG00000058301	Upf1	ortholog_one2one	94.6364	92.6157	0	81.7	1	0.00831896	1	0.461269	0.000804017	0.105998	0.444044
ENSDARG00000098349	hdac4	ENSMUSG00000026313	Hdac4	ortholog_one2one	81.2317	77.2305	50	1.07	0	0.0133956	1	-0.0826326	0.25855	0.0882578	0.225762
ENSDARG00000061458	phf14	ENSMUSG00000029629	Phf14	ortholog_one2one	75.1641	73.0074	0	80.23	1	0.0196775	1	-0.816435	5.26919e-12	0.0559391	0.36545
ENSDARG00000101061	eif2a	ENSMUSG00000027810	Eif2a	ortholog_one2one	72.2414	72.117	0	55.07	0	0.0198183	1	-0.462956	1.67586e-05	-0.993356	1.824e-10
ENSDARG00000090721	prdm2a	ENSMUSG00000057637	Prdm2	ortholog_one2many	38.7363	41.2522	0	0	0	0.0208787	0.990524	-0.22582	0.100516	0.274491	0.0322582
ENSDARG00000077946	smarcc2	ENSMUSG00000025369	Smarcc2	ortholog_one2one	76.4479	65.2927	50	78.24	1	0.0261667	0.992732	0.559701	8.39456e-06	0.0281121	0.851213
ENSDARG00000012827	mettl3	ENSMUSG00000022160	Mettl3	ortholog_one2one	69.1781	69.6552	0	99.2	1	0.027879	1	-0.0459651	0.847438	0.10889	0.494808
ENSDARG00000005315	celf1	ENSMUSG00000005506	Celf1	ortholog_one2one	84.6307	82.6511	50	47.95	0	0.0324572	0.95418	0.0310533	0.649155	0.128694	0.0291355
ENSDARG00000001929	pink1	ENSMUSG00000028756	Pink1	ortholog_one2one	53.1359	52.5862	0	90.42	1	0.0346461	1	0.698293	3.88371e-14	0.635717	3.10108e-13
ENSDARG00000011564	sfpq	ENSMUSG00000028820	Sfpq	ortholog_one2one	56.7398	51.7883	25	51.23	0	0.0352161	0.893948	0.240177	0.0244283	0.505459	2.96376e-05
ENSDARG00000099375	poldip3	ENSMUSG00000041815	Poldip3	ortholog_one2one	41.6327	48.5714	25	21.26	0	0.0401358	0.987175	0.391244	6.66798e-07	0.254012	0.000205714
ENSDARG00000011245	esrp1	ENSMUSG00000040728	Esrp1	ortholog_one2one	62.605	65.6388	50	33.26	0	0.0441717	0.983858	1.30682	1.63029e-19	1.60593	4.5407e-21
ENSDARG00000105255	zbtb4	ENSMUSG00000018750	Zbtb4	ortholog_one2one	20.6369	32.9939	0	14.44	0	0.0531244	0.855452	0.477135	6.58416e-05	1.27272	2.22446e-12
ENSDARG00000057465	gfpt1	ENSMUSG00000029992	Gfpt1	ortholog_one2many	91.3146	57.1219	25	57.64	0	0.0539847	0.927339	0.55963	0.00516157	0.785274	0.000186663
ENSDARG00000099329	h2afy	ENSMUSG00000015937	H2afy	ortholog_one2one	73.9496	70.9677	0	100	1	0.0544478	0.849782	0.660734	6.29948e-15	0.54414	3.64172e-13
ENSDARG00000019367	tgfb3	ENSMUSG00000021253	Tgfb3	ortholog_one2one	73.9024	73.5437	75	99.19	1	0.054559	0.708026	2.28032	1.15976e-22	0.199571	0.000698158
ENSDARG00000051916	cdk7	ENSMUSG00000069089	Cdk7	ortholog_one2one	85.5072	85.2601	0	100	1	0.056532	0.757134	-0.180013	0.00982574	0.0747426	0.287355
ENSDARG00000018907	kat6a	ENSMUSG00000031540	Kat6a	ortholog_one2one	51.1131	57.314	0	66.15	0	0.0604007	0.729067	0.120608	0.20357	0.554644	5.93452e-07
ENSDARG00000018989	hspa4b	ENSMUSG00000020361	Hspa4	ortholog_one2many	72.5	72.3278	0	92.72	1	0.0654032	0.678784	-1.04558	6.14662e-15	-0.728816	6.70253e-12
ENSDARG00000060679	kdm1a	ENSMUSG00000036940	Kdm1a	ortholog_one2one	87.395	83.3906	25	9.91	0	0.0722056	0.862467	0.111181	0.109351	0.416207	1.19295e-06
ENSDARG00000026376	aco1	ENSMUSG00000028405	Aco1	ortholog_one2one	82.6966	82.7896	0	57.81	0	0.0752093	0.878143	0.271828	0.000167211	0.210539	0.00230719
ENSDARG00000013847	egfra	ENSMUSG00000020122	Egfr	ortholog_one2one	62.2166	61.2397	0	49.45	0	0.0762478	0.650582	0.495502	0.0581358	1.37486	4.1381e-06
ENSDARG00000006181	hif1aa	ENSMUSG00000021109	Hif1a	ortholog_one2many	52.3013	44.8565	50	3.05	0	0.0807134	0.437066	-1.20266	5.32388e-15	0.507925	3.58906e-08
ENSDARG00000008384	hdac6	ENSMUSG00000031161	Hdac6	ortholog_one2one	50.0463	47.0844	25	6.88	0	0.0849421	0.937574	0.878609	6.96952e-07	-0.12498	0.42732
ENSDARG00000034700	vegfab	ENSMUSG00000023951	Vegfa	ortholog_one2many	46.0526	26.7857	50	0.16	0	0.0857299	0.775495	1.16372	1.05367e-05	1.2926	2.01957e-06
ENSDARG00000079323	rgmb	ENSMUSG00000048027	Rgmb	ortholog_one2one	60.5505	60.5505	0	7.65	0	0.0889005	0.797299	0.905605	2.1543e-11	0.77126	5.5327e-10
ENSDARG00000029722	hmgb2a	ENSMUSG00000054717	Hmgb2	ortholog_one2many	73.2394	74.2857	100	66.88	1	0.0911233	0.740199	1.23232	1.15976e-07	1.45074	6.95203e-09
ENSDARG00000016065	tlr3	ENSMUSG00000031639	Tlr3	ortholog_one2one	47.0653	46.9613	100	42.32	0	0.0935119	0.801719	1.68672	1.50354e-17	1.05132	3.74712e-13
ENSDARG00000042690	s1pr1	ENSMUSG00000045092	S1pr1	ortholog_one2one	71.547	67.801	50	97.03	1	0.0987134	0.715941	-1.44997	3.21659e-12	0.452812	0.000126215
ENSDARG00000007405	strap	ENSMUSG00000030224	Strap	ortholog_one2one	81.459	76.5714	0	57.24	0	0.100282	0.711986	0.679496	1.72555e-10	0.443278	2.84412e-07
ENSDARG00000007523	kmt2e	ENSMUSG00000029004	Kmt2e	ortholog_one2one	56.6008	38.3298	0	50.77	0	0.104023	0.645288	-0.33527	2.68952e-07	0.92052	2.29108e-15
ENSDARG00000100481	smg6	ENSMUSG00000038290	Smg6	ortholog_one2one	45.6606	49.7179	0	16.68	0	0.106157	0.692532	0.120278	0.0745848	0.41629	5.51103e-07
ENSDARG00000053685	gtf2a2	ENSMUSG00000033543	Gtf2a2	ortholog_one2one	93.578	93.578	25	69.44	0	0.108201	0.321938	0.396069	5.09849e-07	-0.323902	1.16313e-05
ENSDARG00000077769	cited1	ENSMUSG00000051159	Cited1	ortholog_one2one	52.6316	39.4089	75	55.61	1	0.108732	0.710666	2.46866	3.61297e-17	1.61845	8.17239e-13
ENSDARG00000010246	prmt1	ENSMUSG00000109324	Prmt1	ortholog_one2one	89.3678	83.8275	0	17.05	0	0.109348	0.612488	1.15935	1.60866e-11	0.81199	1.3337e-08
ENSDARG00000060991	mief1	ENSMUSG00000022412	Mief1	ortholog_one2one	68.5897	69.3305	0	92.58	1	0.110664	0.705864	0.0806935	0.525199	-0.359615	0.00380432
ENSDARG00000004870	psen1	ENSMUSG00000019969	Psen1	ortholog_one2one	70.8333	69.1649	25	12.7	0	0.111098	0.806963	0.0438465	0.455764	0.222924	0.000318118
ENSDARG00000087528	snip1	ENSMUSG00000050213	Snip1	ortholog_one2one	56.9519	55.6136	50	72.69	0	0.112583	0.877462	-0.419557	0.000364702	-0.905607	1.1715e-08
ENSDARG00000007369	tcf7l1b	ENSMUSG00000055799	Tcf7l1	ortholog_one2many	73.2727	67.2788	0	0	0	0.114617	0.796411	2.23729	1.00841e-17	1.87252	8.62764e-16
ENSDARG00000031891	tbx1	ENSMUSG00000009097	Tbx1	ortholog_one2one	71.5812	68.6475	50	98.5	1	0.114718	0.124661	3.65721	1.17624e-18	4.73679	1.12663e-21
ENSDARG00000079201	tshz2	ENSMUSG00000047907	Tshz2	ortholog_one2one	55.684	56.1165	0	44.85	0	0.115077	0.773053	2.09948	6.05945e-05	1.12297	0.0292692
ENSDARG00000007141	psmc3	ENSMUSG00000002102	Psmc3	ortholog_one2one	98.7624	90.2715	0	51.31	0	0.116674	0.424604	-0.0044614	1	-0.0633113	0.422539
ENSDARG00000025032	nr3c1	ENSMUSG00000024431	Nr3c1	ortholog_one2one	48.9276	46.0859	50	1.22	0	0.1201	0.295877	-1.08193	8.23247e-09	0.645735	4.56857e-06
ENSDARG00000063212	prmt2	ENSMUSG00000020230	Prmt2	ortholog_one2one	53.528	46.3158	0	37.65	0	0.120294	0.899565	0.775601	3.46551e-17	0.411734	1.04052e-11
ENSDARG00000077842	ajuba	ENSMUSG00000022178	Ajuba	ortholog_one2one	37.3547	46.9835	0	4.9	0	0.123305	0.868807	2.24185	3.52741e-11	1.74685	7.06542e-09
ENSDARG00000054903	mta3	ENSMUSG00000055817	Mta3	ortholog_one2one	61.354	73.6041	75	27.4	1	0.126241	0.580604	-0.165704	0.202632	-0.150343	0.252709
ENSDARG00000099635	akap8l	ENSMUSG00000002625	Akap8l	ortholog_one2one	34.1085	34.3214	0	5.81	0	0.128215	0.445799	-0.798645	2.82992e-11	-0.738328	1.31215e-10
ENSDARG00000028517	hbp1	ENSMUSG00000002996	Hbp1	ortholog_one2one	66.3968	62.3574	50	6.82	0	0.129575	0.450668	-0.0958112	0.412825	0.137337	0.225762
ENSDARG00000002184	igbp1	ENSMUSG00000031221	Igbp1	ortholog_one2many	47.6056	49.7059	50	50.98	0	0.129904	0.3629	0.105147	0.367344	0.220074	0.0386987
ENSDARG00000102634	parn	ENSMUSG00000022685	Parn	ortholog_one2one	59.0909	62.5	0	76.13	1	0.130869	0.697776	0.186072	0.00165507	-0.623936	8.14547e-11
ENSDARG00000101210	glg1b	ENSMUSG00000003316	Glg1	ortholog_one2many	76.1458	62.2128	0	4.48	0	0.131731	0.907676	0.904223	2.07497e-17	1.17669	1.76518e-19
ENSDARG00000003920	setb	ENSMUSG00000054766	Set	ortholog_one2many	86.9091	82.699	0	73.85	0	0.139373	0.416726	0.688929	7.52665e-05	0.52842	0.00129227
ENSDARG00000034734	med6	ENSMUSG00000002679	Med6	ortholog_one2one	74.4094	76.8293	50	46.5	0	0.142392	0.66997	-0.682812	1.15046e-07	-0.399683	0.000167949
ENSDARG00000060494	eprs	ENSMUSG00000026615	Eprs	ortholog_one2one	64.6465	71.9577	0	87.59	1	0.143187	0.772335	-0.855442	8.567e-11	-0.567182	9.38427e-08
ENSDARG00000103610	actr8	ENSMUSG00000015971	Actr8	ortholog_one2one	75.2809	75.1603	50	53.49	0	0.143295	0.565608	-0.417889	4.84232e-09	-0.466842	7.4686e-10
ENSDARG00000043288	impact	ENSMUSG00000024423	Impact	ortholog_one2one	58.9905	58.805	25	60.03	0	0.14457	0.471378	0.114251	0.24274	-0.0981337	0.324632
ENSDARG00000029510	timm17a	ENSMUSG00000062580	Timm17a	ortholog_one2one	71.6418	84.2105	50	91.89	1	0.148969	0.419141	-0.0382732	0.702915	0.275643	0.00227943
ENSDARG00000016443	eif3c	ENSMUSG00000030738	Eif3c	ortholog_one2one	73.2768	75.8507	0	100	1	0.149636	0.546998	0.797439	2.52331e-12	0.592571	7.44073e-10
ENSDARG00000102741	sumo2b	ENSMUSG00000020738	Sumo2	ortholog_one2many	95.8333	96.8421	75	23.8	1	0.150281	0.187665	0.167913	0.069453	0.0622994	0.538698
ENSDARG00000008380	brd7	ENSMUSG00000031660	Brd7	ortholog_one2one	53.1847	51.3057	100	22.54	1	0.150615	0.33786	-0.168689	0.0871548	-0.526781	1.08715e-05
ENSDARG00000040582	c18h3orf33	ENSMUSG00000048581	E130311K13Rik	ortholog_one2one	37.751	31.9728	75	0	0	0.152003	0.805874	-0.187761	0.0378449	-0.074139	0.426826
ENSDARG00000075437	shc1	ENSMUSG00000042626	Shc1	ortholog_one2one	74.8899	58.7219	25	42.56	0	0.153495	0.495166	0.127506	0.0975777	0.0801462	0.322202
ENSDARG00000015239	prpf19	ENSMUSG00000024735	Prpf19	ortholog_one2one	84.9505	82.0268	0	98.59	1	0.160456	0.56244	0.710606	7.29491e-10	-0.868035	1.4852e-10
ENSDARG00000004184	nf1b	ENSMUSG00000020716	Nf1	ortholog_one2many	87.423	84.8997	50	9.3	0	0.161213	0.621352	0.738605	0.00224688	1.08544	1.07857e-05
ENSDARG00000045641	usp3	ENSMUSG00000032376	Usp3	ortholog_one2one	73.4733	74.0385	50	100	1	0.162457	0.188226	-0.434205	3.72492e-08	-0.511466	2.68054e-09
ENSDARG00000038976	pdcd7	ENSMUSG00000041837	Pdcd7	ortholog_one2one	36.9658	35.7438	25	7.9	0	0.163499	0.789868	-1.04796	9.07781e-15	-1.60628	4.41564e-18
ENSDARG00000000729	daxx	ENSMUSG00000002307	Daxx	ortholog_one2one	33.1006	32.027	25	22.81	0	0.164294	0.320408	1.02562	7.33952e-10	0.68318	8.62648e-07
ENSDARG00000005551	hnrnph1l	ENSMUSG00000007850	Hnrnph1	ortholog_many2many	82.801	71.3983	0	52.01	0	0.164832	0.0823763	-0.377721	2.69004e-10	-0.642006	1.59942e-14
ENSDARG00000028957	maff	ENSMUSG00000042622	Maff	ortholog_one2one	56.962	57.6923	50	0	0	0.165693	0.409657	0	0.686279	0	0.742486
ENSDARG00000100280	znfx1	ENSMUSG00000039501	Znfx1	ortholog_one2one	50.937	46.988	0	16.2	0	0.172677	0.72519	1.7777	5.07707e-16	1.27226	7.03148e-13
ENSDARG00000075774	foxj3	ENSMUSG00000032998	Foxj3	ortholog_one2one	75.8446	72.0706	0	72.16	0	0.18093	0.649655	0.0677399	0.47947	-0.330811	0.000540038
ENSDARG00000031774	pus7	ENSMUSG00000057541	Pus7	ortholog_one2one	67.6236	63.6637	25	82.69	1	0.181813	0.576808	0.167569	0.129456	-0.143539	0.203068
ENSDARG00000015921	pwp1	ENSMUSG00000001785	Pwp1	ortholog_one2one	68.1633	66.6667	0	14.99	0	0.18246	0.602414	-0.275231	0.0208636	-0.764823	6.76027e-07
ENSDARG00000042005	elp3	ENSMUSG00000022031	Elp3	ortholog_one2one	88.9306	83.7456	50	75.68	1	0.182562	0.689724	0.264421	0.0181566	-0.0542888	0.691364
ENSDARG00000052536	tia1	ENSMUSG00000071337	Tia1	ortholog_one2many	78.0702	69.171	25	46.42	0	0.182653	0.35618	-0.0624617	0.430703	-0.394621	2.25817e-05
ENSDARG00000008020	med31	ENSMUSG00000020801	Med31	ortholog_one2one	80.1471	83.2061	25	13.91	0	0.183222	0.148696	0.196599	0.0329777	-0.39116	0.000160539
ENSDARG00000075376	sgsm1b	ENSMUSG00000042216	Sgsm1	ortholog_one2many	59.9562	75.2059	0	4.41	0	0.185556	0.843483	-1.59637	9.21631e-10	-1.50669	2.46308e-09
ENSDARG00000103507	n4bp2l2	ENSMUSG00000029655	N4bp2l2	ortholog_one2one	28.2222	22.087	0	1.88	0	0.185996	0.54645	0.0585501	0.482728	-0.237155	0.0029033
ENSDARG00000015427	hdac1	ENSMUSG00000061062	Gm10093	ortholog_one2many	87.5	87.1369	0	90.93	1	0.186843	0.300436	0.414168	0.323391	0.0826846	0.879913
ENSDARG00000031562	tada2a	ENSMUSG00000018651	Tada2a	ortholog_one2one	80.9976	76.9752	50	47.35	0	0.190006	0.428145	0.209661	0.0162787	0.309412	0.000776181
ENSDARG00000099298	xrcc5	ENSMUSG00000026187	Xrcc5	ortholog_one2one	57.0839	56.694	50	52.08	0	0.195606	0.513426	-0.944725	1.91691e-08	-2.04136	2.49178e-14
ENSDARG00000016181	trim33	ENSMUSG00000033014	Trim33	ortholog_one2one	57.7381	59.5614	50	15.66	0	0.197915	0.0570108	-1.09473	1.6475e-10	-0.257319	0.00629425
ENSDARG00000058818	rbm38	ENSMUSG00000027510	Rbm38	ortholog_one2many	74.6479	44.7257	50	0	0	0.199212	0.231589	0	5.83913e-06	0	7.01211e-10
ENSDARG00000098240	meis2a	ENSMUSG00000027210	Meis2	ortholog_one2one	94.6154	77.3585	100	99.42	1	0.199685	0.0778102	0	0.108708	0	1.80284e-05
ENSDARG00000016484	dkc1	ENSMUSG00000031403	Dkc1	ortholog_one2one	74.7036	74.2633	0	71.2	0	0.207606	0.627991	0.260551	1.16935e-05	0.799975	3.87045e-14
ENSDARG00000079312	kmt2ca	ENSMUSG00000038056	Kmt2c	ortholog_one2many	46.5874	46.3499	75	31.21	0	0.213984	0.210354	-0.583367	3.54075e-08	0.396581	3.05769e-06
ENSDARG00000061718	znf704	ENSMUSG00000040209	Zfp704	ortholog_one2one	48.503	42.9329	75	0.87	0	0.214957	0.124855	0	1.1943e-18	0	1.03505e-13
ENSDARG00000031777	pparaa	ENSMUSG00000022383	Ppara	ortholog_one2many	64.4681	64.7436	75	0	1	0.215063	0.174081	1.32545	0.003207	1.16892	0.0111069
ENSDARG00000078904	brd4	ENSMUSG00000024002	Brd4	ortholog_one2one	55.1247	56.8166	0	87.03	1	0.215638	0.420468	0.153062	0.0587085	0.340586	0.00015499
ENSDARG00000029724	pqbp1	ENSMUSG00000031157	Pqbp1	ortholog_one2one	62.069	61.597	0	26.86	0	0.215754	0.558523	0.167646	0.24957	-0.534208	0.000589153
ENSDARG00000034956	myclb	ENSMUSG00000028654	Mycl	ortholog_one2many	28.7634	29.0761	50	67.15	0	0.220999	0.574805	1.82061	4.58582e-16	0.481249	2.06552e-05
ENSDARG00000071150	cica	ENSMUSG00000005442	Cic	ortholog_one2many	35.2268	36.8127	0	23.62	0	0.22665	0.13346	0.219096	0.326884	0.265149	0.230897
ENSDARG00000060697	kmt2bb	ENSMUSG00000006307	Kmt2b	ortholog_one2many	31.8516	33.5422	25	9.04	0	0.231021	0.14074	-0.52286	0.00684349	0.0296053	0.954064
ENSDARG00000077540	f2rl1.2	ENSMUSG00000021678	F2rl1	ortholog_one2many	47.037	31.8296	75	3.56	0	0.23801	0.548684	1.29977	1.52226e-07	-0.0648959	0.874033
ENSDARG00000012866	picalma	ENSMUSG00000039361	Picalm	ortholog_one2many	83.1918	74.2424	50	26.23	0	0.244503	0.377209	-0.422627	0.00204809	0.762264	1.03432e-07
ENSDARG00000078966	rbm15b	ENSMUSG00000074102	Rbm15b	ortholog_one2one	54.7239	50.2818	25	63.96	0	0.244914	0.451657	0.630719	8.65474e-06	0.817418	1.13862e-07
ENSDARG00000043559	gle1	ENSMUSG00000019715	Gle1	ortholog_one2one	50.6276	51.9313	0	55.11	0	0.254535	0.224058	-0.164442	0.000839857	-0.579584	6.80905e-12
ENSDARG00000074747	brwd1	ENSMUSG00000022914	Brwd1	ortholog_one2one	46.4253	43.967	50	1.1	0	0.26255	0.324157	0.813406	1.29965e-10	0.750253	6.88483e-10
ENSDARG00000071467	zbtb33	ENSMUSG00000048047	Zbtb33	ortholog_one2one	42.9487	39.9404	50	77.24	0	0.266843	0.282626	0.387853	0.41089	0.641552	0.104896
ENSDARG00000069360	ppp3r1b	ENSMUSG00000033953	Ppp3r1	ortholog_one2many	100	100	50	5.41	0	0.267926	0.00853256	0.782882	1.38152e-08	-0.245071	0.0146927
ENSDARG00000054574	znhit1	ENSMUSG00000059518	Znhit1	ortholog_one2one	76.6234	74.6835	0	26.04	0	0.269042	0.0530658	-0.716934	3.92775e-07	-0.792162	9.19318e-08
ENSDARG00000077760	ascc1	ENSMUSG00000044475	Ascc1	ortholog_one2one	58.2329	40.7303	0	72.49	0	0.270416	0.403598	0.2576	0.000946717	-0.778663	1.47747e-10
ENSDARG00000037708	exosc10	ENSMUSG00000017264	Exosc10	ortholog_one2one	59.0656	59.8647	0	60.87	0	0.270935	0.223285	-0.350432	0.00324781	-0.14077	0.221945
ENSDARG00000055477	pelo	ENSMUSG00000042275	Pelo	ortholog_one2one	81.8182	81.8182	0	98.47	1	0.277059	0.439198	0.00256836	1	0.306002	0.0617498
ENSDARG00000099164	nacc1a	ENSMUSG00000001910	Nacc1	ortholog_one2many	62.9442	72.3735	50	97.8	1	0.281326	0.193188	1.31022	3.5517e-09	0.895319	2.61786e-06
ENSDARG00000044619	birc2	ENSMUSG00000032000	Birc3	ortholog_one2many	49.1499	52.8239	50	69.93	0	0.284847	0.0406663	0	3.80665e-12	0	9.57755e-14
ENSDARG00000015628	psmd10	ENSMUSG00000031429	Psmd10	ortholog_one2one	69.0266	67.5325	0	99.22	1	0.285377	0.0527566	0.455262	3.11948e-08	0.249365	0.000157403
ENSDARG00000076584	patz1	ENSMUSG00000020453	Patz1	ortholog_one2one	57.44	56.0062	50	86.29	1	0.287194	0.417071	1.39641	3.57329e-19	1.04585	2.29848e-16
ENSDARG00000020101	psmc2	ENSMUSG00000028932	Psmc2	ortholog_one2one	99.0762	90.3158	25	95.7	1	0.290038	0.129805	0.166059	0.000734516	0.119206	0.010811
ENSDARG00000061411	nelfa	ENSMUSG00000029111	Nelfa	ortholog_one2one	79.1897	81.1321	50	98.96	1	0.291105	0.200616	-0.126579	0.0177136	-0.210874	0.000286449
ENSDARG00000075823	ZNF608	ENSMUSG00000052713	Zfp608	ortholog_one2one	40.9055	34.679	25	4.66	0	0.291766	0.352081	-0.407341	7.53592e-05	0.151121	0.0697048
ENSDARG00000004714	tcf12	ENSMUSG00000032228	Tcf12	ortholog_one2one	67.2176	69.1218	50	94.13	1	0.294933	0.160576	0.618626	3.26832e-09	0.592003	7.88142e-09
ENSDARG00000102265	smarcal1	ENSMUSG00000039354	Smarcal1	ortholog_one2one	54.5229	48.3517	0	21.68	0	0.302476	0.264198	-1.70788	9.29278e-16	-1.52468	1.076e-14
ENSDARG00000011703	clocka	ENSMUSG00000029238	Clock	ortholog_one2many	62.0732	59.5322	75	48.26	1	0.304393	0.391406	-0.284351	0.0472444	-0.799315	9.44848e-06
ENSDARG00000077934	tegt	ENSMUSG00000023010	Tmbim6	ortholog_one2one	69.0678	68.7764	0	51.76	0	0.305521	0.0482246	-0.0574639	0.134297	0.53458	7.63004e-13
ENSDARG00000000857	mapk14a	ENSMUSG00000053436	Mapk14	ortholog_one2many	91.4127	91.6667	0	67.02	0	0.306825	0.0982546	0.311338	0.000296191	0.316099	0.000253126
ENSDARG00000001129	dicer1	ENSMUSG00000041415	Dicer1	ortholog_one2one	79.4322	77.8069	25	91.14	1	0.306978	0.507824	0.0731004	0.426058	0.251296	0.00329664
ENSDARG00000044811	cdk9	ENSMUSG00000009555	Cdk9	ortholog_one2one	84.8101	90.0538	0	93.97	1	0.307573	0.160473	0.738533	3.18514e-15	0.622114	1.2421e-13
ENSDARG00000016085	mbnl3	ENSMUSG00000036109	Mbnl3	ortholog_one2one	59.2784	67.2515	50	12.48	0	0.309452	0.411932	0	0.79536	0	1
ENSDARG00000006782	rb1	ENSMUSG00000022105	Rb1	ortholog_one2one	51.6058	50.5972	50	2.51	0	0.310762	0.563319	-1.04511	1.68516e-10	-0.741675	5.7468e-08
ENSDARG00000008904	smarca2	ENSMUSG00000024921	Smarca2	ortholog_one2one	75.7653	75.0474	50	12.56	0	0.313751	0.380674	0.772544	5.27904e-12	0.885978	4.43855e-13
ENSDARG00000009735	gigfy2	ENSMUSG00000048000	Gigyf2	ortholog_one2one	59.7442	61.5027	0	60.91	0	0.315502	0.521735	0.0372846	0.646862	0.415538	1.3448e-06
ENSDARG00000008852	elp4	ENSMUSG00000027167	Elp4	ortholog_one2one	55.4156	52.1327	100	0.33	1	0.319212	0.124748	-1.11059	1.94583e-11	-1.20216	5.91671e-12
ENSDARG00000007996	pou2f1b	ENSMUSG00000026565	Pou2f1	ortholog_one2one	74.9288	66.3304	75	97.28	1	0.322856	0.43117	-0.302954	0.013059	1.23667	7.00761e-13
ENSDARG00000067560	gtf2h3	ENSMUSG00000029387	Gtf2h3	ortholog_one2one	69.9324	66.9903	25	94.1	1	0.324591	0.226467	0.47678	1.09223e-06	-0.134868	0.0930806
ENSDARG00000000935	unk	ENSMUSG00000020770	Unk	ortholog_one2one	59.0734	56.6667	25	33.37	0	0.328717	0.0812978	-0.0346521	0.753719	1.04993	1.07769e-11
ENSDARG00000010794	tfeb	ENSMUSG00000023990	Tfeb	ortholog_one2one	54.7862	50.3745	50	82.67	1	0.330509	0.154511	0.872481	1.38913e-10	1.29336	5.29248e-14
ENSDARG00000003680	runx1t1	ENSMUSG00000006586	Runx1t1	ortholog_one2one	88.3249	86.4238	100	100	1	0.333737	0.602403	-3.91339	4.06277e-21	-1.7527	1.91657e-16
ENSDARG00000061352	bcl11aa	ENSMUSG00000000861	Bcl11a	ortholog_one2one	77.0808	76.5269	100	96.33	1	0.333901	0.399924	0	0.0148026	0	0.00031892
ENSDARG00000103845	zgc:55733	ENSMUSG00000060373	Hnrnpc	ortholog_one2many	57.508	57.508	0	75.96	1	0.337345	0.0148618	0.00706529	1	-0.270528	0.00395763
ENSDARG00000061994	acacb	ENSMUSG00000042010	Acacb	ortholog_one2one	73.4702	71.6095	50	52.43	0	0.338802	0.643477	0	0.739886	0	0.636733
ENSDARG00000105231	setd8a	ENSMUSG00000049327	Kmt5a	ortholog_one2many	40.6593	30.4945	50	38.84	0	0.341711	0.0830176	-1.66687	3.8461e-10	-0.737463	8.35927e-05
ENSDARG00000099241	ppp2cb	ENSMUSG00000009630	Ppp2cb	ortholog_one2many	99.6764	99.6764	75	19.76	1	0.34203	0.0476472	0.597782	6.04363e-06	1.03564	9.12261e-10
ENSDARG00000036784	commd7	ENSMUSG00000056941	Commd7	ortholog_one2one	61.5	61.5	25	34.95	0	0.343028	0.0104297	-0.176475	0.00233384	0.241363	0.000112594
ENSDARG00000045486	pawr	ENSMUSG00000035873	Pawr	ortholog_one2one	49.1803	45.045	75	50.13	0	0.344294	0.265455	-1.07565	5.47017e-11	-0.222239	0.0232026
ENSDARG00000003769	tada2b	ENSMUSG00000029196	Tada2b	ortholog_one2one	73.6626	85.2381	100	93.4	1	0.349334	0.0842666	-1.50053	2.35327e-16	-1.08303	1.39955e-13
ENSDARG00000098141	supt3h	ENSMUSG00000038954	Supt3	ortholog_one2one	64.3098	51.0695	75	31.84	1	0.352737	0.51584	1.20987	1.27332e-07	0.478884	0.012723
ENSDARG00000103851	tnrc6c2	ENSMUSG00000025571	Tnrc6c	ortholog_one2many	57.2922	54.7895	25	0	0	0.356565	0.534421	0.00937902	1	1.34627	1.30118e-11
ENSDARG00000062646	tet3	ENSMUSG00000034832	Tet3	ortholog_one2one	48.4163	29.6728	0	36.66	0	0.361358	0.386765	-0.179883	0.135906	-0.233959	0.0567106
ENSDARG00000056725	hmgb3a	ENSMUSG00000015217	Hmgb3	ortholog_one2many	62.4413	66.5	50	0	0	0.362128	0.1223	0.656503	0.00150281	0.192074	0.355152
ENSDARG00000038954	ctnnbip1	ENSMUSG00000028988	Ctnnbip1	ortholog_one2one	87.6543	87.6543	25	62.04	0	0.365384	0.451573	0.900938	2.21159e-06	0.796005	1.3803e-05
ENSDARG00000020043	cnot8	ENSMUSG00000020515	Cnot8	ortholog_one2one	84.2105	82.1918	50	56.38	0	0.369259	0.204728	-0.78196	1.78088e-13	-0.60369	2.88465e-11
ENSDARG00000042904	foxo3b	ENSMUSG00000048756	Foxo3	ortholog_one2many	58.8326	56.994	100	83.11	1	0.370166	0.107746	0.0218142	1	0.984594	0.000135158
ENSDARG00000031981	pcbd1	ENSMUSG00000020098	Pcbd1	ortholog_one2one	72.549	71.1538	25	95.89	1	0.374444	0.00982814	2.53991	2.13843e-15	-0.023234	0.964698
ENSDARG00000058094	ciarta	ENSMUSG00000038550	Ciart	ortholog_one2one	26.8156	25.6	0	6.13	0	0.375752	0.194737	-0.970154	7.77185e-10	0.51925	9.45435e-06
ENSDARG00000035558	gps2	ENSMUSG00000023170	Gps2	ortholog_one2one	55.6787	61.4679	0	55.61	0	0.380096	0.0151724	-0.177128	0.234039	0.0720297	0.698217
ENSDARG00000007413	arid2	ENSMUSG00000033237	Arid2	ortholog_one2one	62.659	53.884	50	51.25	0	0.381429	0.0612102	0.158668	0.195103	1.15241	5.47835e-11
ENSDARG00000062650	rif1	ENSMUSG00000036202	Rif1	ortholog_one2one	37.2492	36.7271	75	42.65	0	0.381709	0.0708125	-0.630143	7.25969e-09	0.410906	2.7885e-06
ENSDARG00000077013	znf280d	ENSMUSG00000036916	Zfp280c	ortholog_one2many	33.4094	39.4879	25	30.06	0	0.387978	0.00382688	-0.458644	0.0664899	0.124496	0.629539
ENSDARG00000013979	ndfip1	ENSMUSG00000024425	Ndfip1	ortholog_one2many	76.7773	73.3032	75	10.52	1	0.39157	0.00130131	-1.68247	4.11624e-16	-0.872594	1.48204e-10
ENSDARG00000077126	snrnp70	ENSMUSG00000063511	Snrnp70	ortholog_one2one	59.3939	65.625	25	92.99	1	0.400133	0.0106532	0.464829	0.00483715	0.113105	0.54075
ENSDARG00000018574	sf3b4	ENSMUSG00000068856	Sf3b4	ortholog_one2one	82.5	77.8302	0	83.48	1	0.402747	0.593474	-0.194782	0.112108	0.0341436	0.866182
ENSDARG00000006038	aebp2	ENSMUSG00000030232	Aebp2	ortholog_one2one	63.1325	51.9841	75	47.16	1	0.402759	0.190936	0.401007	0.00107714	-0.295775	0.0173177
ENSDARG00000041397	eif2b2	ENSMUSG00000004788	Eif2b2	ortholog_one2one	78.8732	79.7721	0	12.12	0	0.408307	0.203223	-0.0821226	0.309991	-0.273505	0.00113432
ENSDARG00000062421	pex2	ENSMUSG00000040374	Pex2	ortholog_one2one	55.4487	56.7213	75	44.95	1	0.409278	0.322916	-0.26669	0.00697454	0.165075	0.0891611
ENSDARG00000074756	tfb2m	ENSMUSG00000026492	Tfb2m	ortholog_one2one	31.3501	34.596	0	0	0	0.414782	0.108452	0.139437	0.100557	0.100734	0.235295
ENSDARG00000079123	ikbkb	ENSMUSG00000031537	Ikbkb	ortholog_one2one	58.0231	59.7094	50	69.67	0	0.419788	0.187341	0.0498819	0.410906	0.209767	0.000746369
ENSDARG00000031426	csrnp1a	ENSMUSG00000032515	Csrnp1	ortholog_one2many	38.6926	37.5643	50	0	0	0.422715	0.25197	-0.200955	0.129875	-0.79797	7.96963e-06
ENSDARG00000105045	bmpr1ab	ENSMUSG00000021796	Bmpr1a	ortholog_one2many	76.2808	75.5639	75	41.14	1	0.430144	0.149619	0.29256	0.000406962	0.323435	0.000141388
ENSDARG00000022413	ing5a	ENSMUSG00000026283	Ing5	ortholog_one2many	68.2008	67.9167	0	44.9	0	0.43194	0.113261	-0.719705	6.21418e-09	-0.434832	1.28107e-05
ENSDARG00000020482	nono	ENSMUSG00000031311	Nono	ortholog_one2one	65.7596	61.3108	0	43.43	0	0.433428	0.202425	0.464083	5.63726e-07	0.322615	8.20051e-05
ENSDARG00000043873	arid4a	ENSMUSG00000048118	Arid4a	ortholog_one2one	47.9933	45.5194	75	49.32	0	0.434803	0.00852178	0.0657855	0.544195	0.802409	7.83454e-09
ENSDARG00000069484	dab2ipa	ENSMUSG00000026883	Dab2ip	ortholog_one2one	75.85	73.1707	0	18.62	0	0.435078	0.0435201	1.18311	5.34915e-13	1.26145	1.6682e-13
ENSDARG00000033443	mdm2	ENSMUSG00000020184	Mdm2	ortholog_one2one	42.3158	41.1043	50	28.76	0	0.436474	0.0101528	-0.71065	7.91211e-08	-0.582186	1.6553e-06
ENSDARG00000054597	cnot6l	ENSMUSG00000034724	Cnot6l	ortholog_one2one	81.932	82.5225	50	99.37	1	0.438028	0.0236727	-0.91026	0.000139039	0.484465	0.00391073
ENSDARG00000025718	cxxc1b	ENSMUSG00000024560	Cxxc1	ortholog_one2many	69.1228	59.697	25	77.19	1	0.439542	0.0620713	-0.245011	0.0310257	-0.0467922	0.75238
ENSDARG00000070573	mapk3	ENSMUSG00000063065	Mapk3	ortholog_one2one	80.3571	82.8947	50	59.17	0	0.441664	0.00187172	0.470749	1.47108e-05	1.1047	1.19775e-11
ENSDARG00000025699	mbd1b	ENSMUSG00000024561	Mbd1	ortholog_one2many	10.9261	17.8571	25	0.44	0	0.441795	0.0148638	0.174545	0.0542291	0.398588	8.3227e-05
ENSDARG00000078784	mgaa	ENSMUSG00000033943	Mga	ortholog_one2one	28.2399	26.0026	75	20.57	0	0.443919	0.193984	0.317899	0.00249616	0.576428	1.72204e-06
ENSDARG00000062577	arhgap35a	ENSMUSG00000058230	Arhgap35	ortholog_one2many	67.3177	68.9793	50	100	1	0.445284	0.17862	-0.128756	0.0234012	0.640404	1.98325e-11
ENSDARG00000036041	f2	ENSMUSG00000027249	F2	ortholog_one2one	51.1811	52.589	25	61.44	0	0.445503	0.0545191	0	1	0	1
ENSDARG00000097456	coa3b	ENSMUSG00000017188	Coa3	ortholog_one2many	22.6087	24.0741	25	0	0	0.445546	0.155122	-1.78477	1.26392e-17	-1.41278	1.94633e-15
ENSDARG00000003681	eif5	ENSMUSG00000021282	Eif5	ortholog_one2one	75.2914	75.2914	25	90.54	1	0.454144	0.0354894	0.479036	3.48709e-06	0.209903	0.0146068
ENSDARG00000070074	lrp8	ENSMUSG00000028613	Lrp8	ortholog_one2one	48.7854	55.4023	0	19.06	0	0.466085	0.102758	-4.92141	3.03985e-25	-0.898032	8.91094e-15
ENSDARG00000057918	tsc1b	ENSMUSG00000026812	Tsc1	ortholog_one2many	41.844	40.6546	25	61.45	0	0.469077	0.0260147	-0.983117	1.78178e-09	0.667034	1.28004e-08
ENSDARG00000074447	dapk3	ENSMUSG00000034974	Dapk3	ortholog_one2one	72.6269	73.4375	0	69.17	0	0.471306	0.0402559	-0.000976777	1	-0.345109	0.00374911
ENSDARG00000025397	srsf3a	ENSMUSG00000078134	Gm12355	ortholog_many2many	81.0345	86.5031	25	0	0	0.475488	0.0896157	-0.923855	0.56239	0.175833	0.779401
ENSDARG00000075253	pik3cb	ENSMUSG00000032462	Pik3cb	ortholog_one2one	67.4074	68.4211	0	92.47	1	0.476798	0.0282801	0.638334	9.54556e-10	0.590995	4.52845e-09
ENSDARG00000002710	ncl	ENSMUSG00000026234	Ncl	ortholog_one2one	50.4965	50.3536	50	7.25	0	0.477787	0.468364	0.56416	6.22525e-09	0.307493	5.90897e-05
ENSDARG00000022996	setx	ENSMUSG00000043535	Setx	ortholog_one2one	34.924	31.2547	25	24.32	0	0.481709	0.223649	-0.544896	4.27603e-06	0.0424302	0.711136
ENSDARG00000014898	ncbp2	ENSMUSG00000022774	Ncbp2	ortholog_one2one	77.4194	76.9231	25	49.9	0	0.486967	0.102399	-0.701142	1.94758e-12	-0.980797	4.44147e-15
ENSDARG00000052094	notch1b	ENSMUSG00000026923	Notch1	ortholog_one2many	69.6883	67.1276	0	10.17	0	0.490986	0.0450424	1.81033	3.41909e-13	0.615138	0.000223045
ENSDARG00000055737	ube3a	ENSMUSG00000025326	Ube3a	ortholog_one2one	84.3641	83.1034	50	99.92	1	0.492681	0.0757836	0.0592574	0.626653	0.289898	0.00724621
ENSDARG00000077467	sox10	ENSMUSG00000024176	Sox8	ortholog_one2many	67.6966	51.9397	0	0	0	0.496776	0.00514775	0	0.00230964	0	9.74098e-08
ENSDARG00000025226	znf668	ENSMUSG00000049728	Zfp668	ortholog_one2one	48.056	49.9192	25	64.54	0	0.49971	0.155122	-0.796661	8.26573e-10	-0.816078	6.35375e-10
ENSDARG00000008097	srsf9	ENSMUSG00000029538	Srsf9	ortholog_one2one	63.6735	70.2703	25	32.27	0	0.503904	0.0202624	0.837706	2.88121e-12	0.443139	2.40803e-07
ENSDARG00000078600	ldlrad3	ENSMUSG00000048058	Ldlrad3	ortholog_one2one	51.5924	46.9565	50	4.15	0	0.506367	0.0352525	-1.00914	1.11934e-12	-0.303607	0.000172863
ENSDARG00000099118	TRAPPC9	ENSMUSG00000047921	Trappc9	ortholog_one2one	77.2864	67.5154	25	96.29	1	0.508019	0.014724	0.268217	8.2565e-06	0.104494	0.0386444
ENSDARG00000037855	taf11	ENSMUSG00000024218	Taf11	ortholog_one2one	62.1359	60.6635	50	35.84	0	0.509806	0.0158064	-0.0175131	0.931864	-0.793263	6.0782e-09
ENSDARG00000039263	zbtb48	ENSMUSG00000028952	Zbtb48	ortholog_one2one	46.9737	52.4229	50	48.29	0	0.514767	0.0819136	-0.280425	0.0058863	-1.29217	1.69904e-11
ENSDARG00000059866	cactin	ENSMUSG00000034889	Cactin	ortholog_one2one	62.1557	67.228	0	18.95	0	0.514836	0.240089	0.574061	1.03135e-05	0.152587	0.169543
ENSDARG00000055357	leo1	ENSMUSG00000042487	Leo1	ortholog_one2one	60.3448	62.9685	0	45.85	0	0.522715	0.00885522	-2.23746	5.55141e-15	-1.07793	4.4537e-09
ENSDARG00000021257	eif3d	ENSMUSG00000016554	Eif3d	ortholog_one2one	89.6739	90.3285	0	99.58	1	0.524169	0.00823501	-0.665958	1.37552e-08	-0.640102	2.75232e-08
ENSDARG00000095512	rca2.2	ENSMUSG00000016493	Cd46	ortholog_many2many	17.9688	18.9041	25	0	0	0.524613	0.12353	-1.3386	2.89638e-05	0	4.76542e-08
ENSDARG00000013802	pcid2	ENSMUSG00000038542	Pcid2	ortholog_one2one	85.7143	85.7143	100	100	1	0.530861	0.0421947	0.514732	6.76426e-08	-0.493672	2.30698e-07
ENSDARG00000098273	zbtb14	ENSMUSG00000049672	Zbtb14	ortholog_one2one	76.2443	75.0557	25	85.99	1	0.540612	0.0822035	0.211474	0.00570472	0.0951854	0.226945
ENSDARG00000006092	rad21a	ENSMUSG00000022314	Rad21	ortholog_one2many	77.0801	77.3228	25	100	1	0.543703	0.0122517	0.33607	2.62203e-05	0.35542	1.3485e-05
ENSDARG00000055305	ret	ENSMUSG00000030110	Ret	ortholog_one2one	58.4991	58.0269	25	5.39	0	0.5485	0.00114748	0	4.26191e-06	0	1
ENSDARG00000020841	rbm7	ENSMUSG00000042396	Rbm7	ortholog_one2one	42.4603	40.3774	0	60.2	0	0.550144	0.0649254	-0.261661	3.69569e-08	-0.179537	1.10784e-05
ENSDARG00000013207	zeb1b	ENSMUSG00000024238	Zeb1	ortholog_one2many	36.8908	39.3017	50	90.76	1	0.551015	0.224491	1.0485	0.00142531	2.25565	1.07362e-10
ENSDARG00000086345	cux2b	ENSMUSG00000042589	Cux2	ortholog_one2one	55.1065	52.5947	25	23.07	0	0.552541	0.135173	1.45184	1.28227e-10	0.0300689	0.977745
ENSDARG00000061187	cbx5	ENSMUSG00000009575	Cbx5	ortholog_one2one	65.6863	70.1571	50	0.8	0	0.55701	0.0414342	-0.115643	0.02574	0.581787	3.36308e-11
ENSDARG00000019116	ing1	ENSMUSG00000045969	Ing1	ortholog_one2one	53.6585	31.5412	25	56.22	0	0.557242	0.137575	-0.117365	0.0831025	-0.696112	2.9527e-10
ENSDARG00000005057	dimt1l	ENSMUSG00000021692	Dimt1	ortholog_one2one	82.6797	80.8307	0	88.4	1	0.566073	0.246413	-1.95089	1.45088e-12	-1.16149	1.06281e-08
ENSDARG00000104959	dnajc17	ENSMUSG00000034278	Dnajc17	ortholog_one2one	60.9121	61.7162	0	81.28	1	0.569581	0.124954	-0.164039	0.287166	-0.893388	3.17495e-06
ENSDARG00000038687	nfkb2	ENSMUSG00000025225	Nfkb2	ortholog_one2one	48.2262	48.3871	25	52.69	0	0.57295	0.0348847	0.214636	0.119788	-0.24859	0.0670481
ENSDARG00000045155	phf5a	ENSMUSG00000061360	Phf5a	ortholog_one2one	100	100	100	100	1	0.574366	0.0901703	-0.0957736	0.0970805	-0.370025	7.22659e-07
ENSDARG00000099999	tcf3b	ENSMUSG00000020167	Tcf3	ortholog_one2many	47.3684	41.3476	25	98.05	1	0.583706	0.0148638	0.921881	9.53974e-11	-0.360405	0.000323309
ENSDARG00000045175	pofut2	ENSMUSG00000020260	Pofut2	ortholog_one2one	70.2703	72.7273	0	18.48	0	0.586242	0.014444	-0.0697601	0.460265	-0.286776	0.00261922
ENSDARG00000074262	nck1a	ENSMUSG00000032475	Nck1	ortholog_one2many	63.5542	55.9682	25	0	0	0.588541	0.0208549	-0.169034	0.0138222	-1.31415	3.7308e-15
ENSDARG00000054799	rfc1	ENSMUSG00000029191	Rfc1	ortholog_one2one	56.4952	57.2438	25	6.77	0	0.588723	0.0464927	0.560799	5.38707e-09	0.925877	4.44856e-13
ENSDARG00000016318	med7	ENSMUSG00000020397	Med7	ortholog_one2one	74.6888	77.2532	50	100	1	0.589119	0.00367501	-0.352034	2.94908e-06	0.200802	0.00154497
ENSDARG00000056184	dvl2	ENSMUSG00000020888	Dvl2	ortholog_one2one	72.423	73.5054	25	98.1	1	0.589601	8.86121e-05	0.854909	3.01182e-07	1.30823	1.00306e-10
ENSDARG00000031346	rbm17	ENSMUSG00000037197	Rbm17	ortholog_one2one	79.6651	82.2222	50	100	1	0.591454	0.0030284	-0.915161	7.21375e-10	-1.18233	7.73982e-12
ENSDARG00000098432	paf1	ENSMUSG00000003437	Paf1	ortholog_one2one	68.4729	51.9626	0	56.3	0	0.592246	0.0808558	-0.299928	0.00961527	-0.111805	0.337492
ENSDARG00000043854	ppil4	ENSMUSG00000015757	Ppil4	ortholog_one2one	72.6872	67.0732	0	53.36	0	0.593375	0.0250373	0.139096	0.0171329	0.0987709	0.0882734
ENSDARG00000104290	ripk2	ENSMUSG00000041135	Ripk2	ortholog_one2one	46.9388	51.2059	0	68.45	0	0.602665	0.479748	1.03636	1.82323e-12	1.10211	6.68112e-13
ENSDARG00000001873	phgdh	ENSMUSG00000053398	Phgdh	ortholog_one2one	60.6061	60.0375	0	72.42	0	0.603341	0.000619773	0.612308	1.39779e-09	-0.501331	6.25577e-08
ENSDARG00000020788	sla2	ENSMUSG00000027636	Sla2	ortholog_one2many	40.1575	39.3822	25	2.69	0	0.606989	0.101444	-1.15151	0.636872	-0.0236063	0.794159
ENSDARG00000014963	triap1	ENSMUSG00000029535	Triap1	ortholog_one2one	74.3243	72.3684	0	100	1	0.611043	0.00867824	-0.515662	3.93173e-06	-0.908637	5.47408e-10
ENSDARG00000031848	pparg	ENSMUSG00000000440	Pparg	ortholog_one2one	58.2781	52.2772	100	16.69	1	0.611804	0.387562	-1.30646	0.000302692	0.146035	0.623802
ENSDARG00000041572	zfpm1	ENSMUSG00000049577	Zfpm1	ortholog_one2one	38.623	46.2312	50	40.13	0	0.617752	0.197868	0.421427	0.000507071	0.063522	0.630575
ENSDARG00000038985	cdyl	ENSMUSG00000059288	Cdyl	ortholog_one2one	61.4458	60.2024	25	27.93	0	0.626322	0.199852	-0.884012	2.00584e-07	-0.65627	1.29981e-05
ENSDARG00000057738	hells	ENSMUSG00000025001	Hells	ortholog_one2one	63.6577	66.1389	0	72.13	0	0.63392	0.319281	1.27793	0.0728492	2.50132	1.25483e-05
ENSDARG00000007755	wdr61	ENSMUSG00000061559	Wdr61	ortholog_one2one	64.918	64.918	25	81.77	1	0.634318	0.0335966	-0.173735	0.00050536	0.139812	0.00357878
ENSDARG00000010873	DDX17	ENSMUSG00000055065	Ddx17	ortholog_one2one	72.5782	74.6933	0	31.89	0	0.641237	4.24728e-05	0.204256	0.102719	0.657061	8.46207e-06
ENSDARG00000026489	khsrp	ENSMUSG00000007670	Khsrp	ortholog_one2one	68.018	60.5615	25	55.09	0	0.65131	0.138601	1.33193	9.16453e-09	0.561929	0.00209416
ENSDARG00000058868	apc	ENSMUSG00000005871	Apc	ortholog_one2one	69.1721	67.0303	25	96.74	1	0.652077	0.0708599	0.935998	3.56377e-13	1.0928	1.66533e-14
ENSDARG00000073957	tox3	ENSMUSG00000043668	Tox3	ortholog_one2one	63.0324	64.3478	100	45.99	1	0.653798	0.0131333	0.800274	3.09961e-05	1.25568	8.92812e-09
ENSDARG00000097543	cbx6b	ENSMUSG00000089715	Cbx6	ortholog_one2many	40.0398	48.5507	25	0	0	0.657287	0.167115	0.700227	1.73682e-09	0.461544	2.08363e-06
ENSDARG00000011582	sox5	ENSMUSG00000041540	Sox5	ortholog_one2one	68.2111	69.4626	50	41.62	0	0.664746	0.0206693	1.20237	3.06159e-10	1.58886	5.88069e-13
ENSDARG00000038635	magoh	ENSMUSG00000028609	Magoh	ortholog_one2many	97.2789	97.9452	25	98.63	1	0.667764	0.0016236	0.466242	1.39511e-05	0.306876	0.0015182
ENSDARG00000016743	angel2	ENSMUSG00000026634	Angel2	ortholog_one2one	45.3427	47.4265	50	6.76	0	0.669903	0.00256564	-0.47511	4.36658e-09	0.193016	0.000887143
ENSDARG00000061030	vezf1b	ENSMUSG00000018377	Vezf1	ortholog_one2many	56.5574	53.2819	25	4.13	0	0.675728	0.162655	0.0468272	0.489296	0.112014	0.0821901
ENSDARG00000062268	jarid2b	ENSMUSG00000038518	Jarid2	ortholog_one2many	56.9018	60.1297	25	86.78	1	0.675871	0.0329829	-0.94548	8.16743e-09	-0.209183	0.0426181
ENSDARG00000077870	taf9	ENSMUSG00000047242	Taf9b	ortholog_one2many	71.371	60.4096	25	58.84	0	0.676622	0.00186351	-1.20715	9.9768e-16	-1.00072	4.91788e-14
ENSDARG00000062060	gmeb1	ENSMUSG00000028901	Gmeb1	ortholog_one2one	43.6644	45.3737	25	22.51	0	0.677289	0.0648233	0.148695	0.544674	0.759373	0.000342901
ENSDARG00000055753	suv39h1b	ENSMUSG00000039231	Suv39h1	ortholog_one2many	66.7458	68.0387	0	31.51	0	0.678072	0.132759	-0.422422	0.00129217	-2.27651	6.47086e-13
ENSDARG00000008487	dmd	ENSMUSG00000045103	Dmd	ortholog_one2one	85.6902	13.839	0	42.37	0	0.678926	0.000187345	-0.236245	0.000809827	0.872333	8.09065e-14
ENSDARG00000070981	ash1l	ENSMUSG00000028053	Ash1l	ortholog_one2one	47.0214	47.4983	0	55.83	0	0.679959	0.0697015	0.196515	0.00167715	0.777439	8.37723e-13
ENSDARG00000016412	agt	ENSMUSG00000031980	Agt	ortholog_one2one	27.3128	25.7261	50	0	0	0.684798	0.112016	2.74258	5.92577e-13	3.7423	2.39607e-16
ENSDARG00000041108	ctsh	ENSMUSG00000032359	Ctsh	ortholog_one2one	60.9091	60.3604	50	85.61	1	0.689491	0.00431295	1.93599	3.38673e-14	2.06068	1.15974e-14
ENSDARG00000044102	znf593	ENSMUSG00000028840	Zfp593	ortholog_one2one	47.2868	45.5224	0	34.13	0	0.69092	0.0045162	-0.0436974	1	-1.27746	0.00244285
ENSDARG00000042590	rbm19	ENSMUSG00000029594	Rbm19	ortholog_one2one	59.3312	57.7731	0	39.75	0	0.697134	0.00149647	-0.248688	0.266225	-0.705576	0.00423001
ENSDARG00000031647	stat2	ENSMUSG00000040033	Stat2	ortholog_one2one	34.2515	31.0195	25	1.67	0	0.697639	0.0907113	1.15177	4.05587e-09	0.0177067	1
ENSDARG00000036754	hmgn3	ENSMUSG00000066456	Hmgn3	ortholog_one2one	45	54.5455	100	1.66	0	0.699103	0.15664	1.88145	2.04422e-22	0.825623	5.07936e-15
ENSDARG00000077130	bcl10	ENSMUSG00000028191	Bcl10	ortholog_one2one	43.1535	44.6352	0	45.84	0	0.701033	0.0495732	0.347489	0.000978457	-0.0324019	0.798935
ENSDARG00000074031	fastkd2	ENSMUSG00000025962	Fastkd2	ortholog_one2one	31.2102	28.447	25	35.18	0	0.703269	0.010176	0.422143	8.17509e-07	0.90456	9.09929e-13
ENSDARG00000059337	tgif1	ENSMUSG00000047407	Tgif1	ortholog_one2one	61.9048	55.4098	25	7.42	0	0.704008	0.00209493	1.0291	2.09295e-07	0.675894	8.52408e-05
ENSDARG00000016548	eif5b	ENSMUSG00000026083	Eif5b	ortholog_one2one	68.1855	68.9145	0	84.98	1	0.706645	0.00375647	-0.132393	0.227506	0.31112	0.00450494
ENSDARG00000019529	parp1	ENSMUSG00000026496	Parp1	ortholog_one2one	68.9042	68.8363	50	95.18	1	0.712127	0.0807329	0.932012	5.95407e-07	0.208961	0.157089
ENSDARG00000061836	nfixb	ENSMUSG00000001911	Nfix	ortholog_one2many	92.8302	49.7976	0	13.7	0	0.715293	0.000369156	1.58708	1.51714e-11	1.65935	7.55894e-12
ENSDARG00000056964	ilk	ENSMUSG00000030890	Ilk	ortholog_one2one	86.5044	86.5044	0	57.27	0	0.718889	0.00238346	0.657481	1.36681e-11	0.625715	3.95326e-11
ENSDARG00000008209	myt1la	ENSMUSG00000061911	Myt1l	ortholog_one2one	63.4049	67.1441	0	58.37	0	0.724366	0.0898858	0	0.130546	0	0.305443
ENSDARG00000026072	pdcd5	ENSMUSG00000030417	Pdcd5	ortholog_one2one	80.4688	81.746	0	44.66	0	0.725563	0.000300416	0.104315	0.440388	-0.216884	0.0914626
ENSDARG00000103057	zfhx3	ENSMUSG00000038872	Zfhx3	ortholog_one2one	64.8515	66.8547	50	79.3	1	0.726685	0.00183715	1.32723	3.94345e-11	1.32486	4.91989e-11
ENSDARG00000028793	nlk2	ENSMUSG00000017376	Nlk	ortholog_one2one	93.2458	94.3074	0	90.79	1	0.728229	0.0238878	0.575153	0.000120317	-0.199492	0.189243
ENSDARG00000056903	mrpl13	ENSMUSG00000022370	Mrpl13	ortholog_one2one	74.3017	74.7191	100	75.23	1	0.733119	5.52752e-05	0.156712	0.0704494	-0.314344	0.000956855
ENSDARG00000056594	irx1b	ENSMUSG00000060969	Irx1	ortholog_one2many	67.3709	59.7917	0	0	0	0.735316	0.000407836	0	0.000572059	0	6.01338e-12
ENSDARG00000102471	trak2	ENSMUSG00000026028	Trak2	ortholog_one2one	46.5257	50.6024	25	2.59	0	0.740022	0.104997	0.768942	1.91691e-08	-0.234499	0.0322334
ENSDARG00000095170	lrrfip1b	ENSMUSG00000026305	Lrrfip1	ortholog_one2many	32.4427	23.3196	25	51.34	0	0.74151	0.0133222	0.787198	2.43811e-12	0.021338	0.834987
ENSDARG00000102855	neo1a	ENSMUSG00000032340	Neo1	ortholog_one2many	70.3911	67.5603	0	40.17	0	0.742327	0.000945425	1.08179	3.17376e-13	1.47662	6.57078e-16
ENSDARG00000030964	pde12	ENSMUSG00000043702	Pde12	ortholog_one2one	57.1912	55.5921	50	70.01	0	0.745817	0.0129811	0.00326894	1	0.0466757	0.77197
ENSDARG00000044183	prkab1a	ENSMUSG00000029513	Prkab1	ortholog_one2many	74.6154	71.8519	0	100	1	0.749325	0.00049091	-1.34534	2.4965e-13	-0.860871	1.02582e-09
ENSDARG00000012219	dpf2	ENSMUSG00000024826	Dpf2	ortholog_one2many	71.1111	71.1111	25	91.26	1	0.756472	0.000742785	0.886934	4.16552e-14	0.17392	0.00343641
ENSDARG00000070617	vhl	ENSMUSG00000033933	Vhl	ortholog_one2one	46.8571	45.3039	25	52.19	0	0.758788	0.00175383	0.369889	1.45442e-09	0.322574	1.70957e-08
ENSDARG00000030703	otx1a	ENSMUSG00000021848	Otx2	ortholog_one2many	57.1006	64.9832	0	0	0	0.765857	0.000681161	0	5.04238e-10	0	2.91376e-15
ENSDARG00000004757	ybx1	ENSMUSG00000028639	Ybx1	ortholog_one2one	72.4919	69.5652	25	100	1	0.77241	0.0462152	-0.499628	0.00233849	-0.465379	0.00426534
ENSDARG00000075624	bend5	ENSMUSG00000028545	Bend5	ortholog_one2one	62.4079	60.3325	75	47.09	1	0.775185	0.07541	1.80959	2.31551e-11	0.287315	0.13495
ENSDARG00000038067	smurf2	ENSMUSG00000018363	Smurf2	ortholog_one2one	90.4575	92.5134	75	100	1	0.777193	0.0636768	0.632968	1.21291e-08	0.0371594	0.732161
ENSDARG00000061328	cdon	ENSMUSG00000038119	Cdon	ortholog_one2one	47.9111	43.12	0	30.14	0	0.782856	0.00533248	1.52138	1.01812e-12	1.13687	6.08586e-10
ENSDARG00000025949	irak1	ENSMUSG00000031392	Irak1	ortholog_one2one	37.4636	34.2667	50	4.18	0	0.783634	0.360739	0.173329	0.0026032	-0.436569	2.34961e-08
ENSDARG00000100440	fastkd3	ENSMUSG00000021532	Fastkd3	ortholog_one2one	38.438	37.9728	0	56.45	0	0.785295	3.95154e-05	-1.02723	4.00458e-08	-0.41144	0.00229479
ENSDARG00000078058	dip2a	ENSMUSG00000020231	Dip2a	ortholog_one2one	81.6857	82.5224	0	100	1	0.787313	0.00428656	1.49161	5.32354e-07	1.55306	2.36415e-07
ENSDARG00000061345	wwp2	ENSMUSG00000031930	Wwp2	ortholog_one2one	74.5098	74.2529	0	78.66	1	0.794755	0.0792458	-2.18381	6.06541e-20	-1.23707	6.57366e-15
ENSDARG00000078233	ctnnd1	ENSMUSG00000034101	Ctnnd1	ortholog_one2many	59.7207	59.2751	25	44.17	0	0.795885	0.0350447	0.23733	0.107384	1.03019	1.22923e-07
ENSDARG00000056483	ssbp4	ENSMUSG00000070003	Ssbp4	ortholog_one2many	66.8394	71.0744	25	5.08	0	0.798469	0.0181616	-0.632205	5.25069e-07	0.313241	0.00197331
ENSDARG00000091138	actr3	ENSMUSG00000026341	Actr3	ortholog_one2many	97.1831	49.5215	25	2.28	0	0.808855	0.00754808	0.80125	1.18609e-12	0.301114	1.77542e-05
ENSDARG00000027199	smad1	ENSMUSG00000031681	Smad1	ortholog_one2one	87.2881	88.6021	0	100	1	0.809156	0.00158475	2.22975	3.03675e-23	0.463616	1.42531e-09
ENSDARG00000014571	ctnnb1	ENSMUSG00000006932	Ctnnb1	ortholog_one2one	97.4359	97.3111	50	61.68	0	0.812609	0.0299	1.00465	2.20973e-10	0.513105	1.21346e-05
ENSDARG00000076068	crtc1a	ENSMUSG00000003575	Crtc1	ortholog_one2many	61.4065	56.8254	0	35.65	0	0.815378	0.119805	0.379859	0.0112156	-0.0537055	0.773891
ENSDARG00000023508	ankrd49	ENSMUSG00000031931	Ankrd49	ortholog_one2one	55.0459	50.4202	50	91.53	1	0.81589	0.326569	-0.102618	0.443598	-0.175287	0.158825
ENSDARG00000078391	fam98a	ENSMUSG00000002017	Fam98a	ortholog_one2one	67.9317	69.5146	50	45.25	0	0.833642	0.0776175	0.0515392	0.721507	0.181637	0.151878
ENSDARG00000098984	pid1	ENSMUSG00000045658	Pid1	ortholog_one2one	70.5314	67.2811	75	50.1	1	0.834715	0.155756	3.4699	1.33079e-16	4.0837	1.63197e-18
ENSDARG00000076509	polr2d	ENSMUSG00000024258	Polr2d	ortholog_one2one	92.1986	91.5493	0	100	1	0.837834	0.000640566	0.380344	0.0136987	-0.0639802	0.739378
ENSDARG00000024631	nlrc5	ENSMUSG00000074151	Nlrc5	ortholog_one2one	26.6323	24.282	100	0	0	0.843274	0.337024	0	0.944874	0	0.153861
ENSDARG00000076380	hnrnpa0l	ENSMUSG00000027439	Gzf1	ortholog_one2one	38.9253	42.068	25	33.98	0	0.845919	0.00103438	0.292092	2.20052e-05	-0.127238	0.0370984
ENSDARG00000015970	phip	ENSMUSG00000032253	Phip	ortholog_one2one	67.5706	67.0511	75	97.51	1	0.851717	0.0043545	0.193138	0.00466603	0.354834	5.22025e-06
ENSDARG00000102730	mapk10	ENSMUSG00000046709	Mapk10	ortholog_one2one	92.1478	85.9914	50	32.31	0	0.85561	0.312754	1.89978	7.15947e-08	2.34306	2.11253e-10
ENSDARG00000045936	pax6b	ENSMUSG00000027168	Pax6	ortholog_one2many	92.4612	95.6422	75	2.29	1	0.862496	0.254412	0	0.838118	0	0.714788
ENSDARG00000076554	cdkn1a	ENSMUSG00000023067	Cdkn1a	ortholog_one2one	33.1169	32.0755	25	16.77	0	0.863878	0.0249168	-0.455246	0.00248484	0.0537591	0.782806
ENSDARG00000070046	eny2	ENSMUSG00000022338	Eny2	ortholog_one2one	85.2632	80.198	50	95.95	1	0.868988	0.002315	0.0892621	0.549536	0.126051	0.381275
ENSDARG00000103483	litaf	ENSMUSG00000022500	Litaf	ortholog_one2one	33.7423	34.1615	75	7.82	0	0.87235	0.000184611	1.58326	7.12145e-21	0.831791	4.53831e-15
ENSDARG00000088123	znf217	ENSMUSG00000052056	Zfp217	ortholog_one2one	38.1053	34.7743	100	73.3	0	0.879867	0.170061	1.17701	0.000193588	0.644142	0.0542563
ENSDARG00000099195	ier2a	ENSMUSG00000053560	Ier2	ortholog_one2many	34.1176	26.2443	50	0	0	0.8824	0.234039	0.69323	3.02055e-13	0.740569	1.07552e-13
ENSDARG00000015930	rwdd1	ENSMUSG00000019782	Rwdd1	ortholog_one2one	78.75	77.7778	75	100	1	0.885684	3.99533e-05	0.0123582	0.9236	-0.662136	1.73249e-09
ENSDARG00000076833	atp1b1b	ENSMUSG00000026576	Atp1b1	ortholog_one2many	55.5205	57.8947	0	55.33	0	0.887297	2.05281e-05	0.361872	0.00493633	-0.403746	0.00207462
ENSDARG00000031756	mef2aa	ENSMUSG00000030557	Mef2a	ortholog_one2many	50.54	46.988	0	88.33	1	0.888875	0.0667648	-0.0474337	0.569714	0.22122	0.00400526
ENSDARG00000099431	med24	ENSMUSG00000017210	Med24	ortholog_one2one	75.5308	75.6839	0	98.88	1	0.891834	0.00417844	-0.361158	7.08026e-05	-0.738474	1.93881e-09
ENSDARG00000031198	hmg20a	ENSMUSG00000032329	Hmg20a	ortholog_one2one	71.8213	60.4046	0	79.93	1	0.896125	0.000897221	-1.11976	1.40383e-15	-1.00607	1.51391e-14
ENSDARG00000054344	gabpb2b	ENSMUSG00000038766	Gabpb2	ortholog_one2many	55.5283	54.5894	50	0	0	0.90099	0.183778	0.00259757	1	0.736542	5.19798e-06
ENSDARG00000070432	ino80	ENSMUSG00000034154	Ino80	ortholog_one2one	74.8711	74.535	50	79.64	1	0.90294	0.00299413	-0.279022	0.0191291	-0.629634	2.50119e-05
ENSDARG00000035957	gmnn	ENSMUSG00000006715	Gmnn	ortholog_one2one	34.0249	39.8058	75	13.06	0	0.904633	0.0468792	0.963884	0.000105909	-0.357458	0.138267
ENSDARG00000020232	eif6	ENSMUSG00000027613	Eif6	ortholog_one2one	90.2041	90.2041	50	100	1	0.913885	0.00145562	-0.0344173	0.807929	-0.229212	0.0376804
ENSDARG00000062472	sin3b	ENSMUSG00000031622	Sin3b	ortholog_one2one	61.7893	67.3042	0	11.66	0	0.927396	0.00210672	1.42987	2.68101e-13	1.30053	2.13746e-12
ENSDARG00000014626	dlx3b	ENSMUSG00000001510	Dlx3	ortholog_one2one	71.7472	67.2474	75	96.2	1	0.957416	0.0119864	0	0.311444	0	2.80936e-06
ENSDARG00000007804	gas6	ENSMUSG00000031451	Gas6	ortholog_one2one	50.7716	48.8131	50	33.52	0	0.958815	1.92776e-05	1.29307	2.84826e-09	0.376804	0.0153328
ENSDARG00000045681	irf5	ENSMUSG00000029771	Irf5	ortholog_one2one	45.6044	50.1006	25	23.43	0	0.960174	0.000813866	-0.0153242	1	0.453824	0.724741
ENSDARG00000026784	robo1	ENSMUSG00000022883	Robo1	ortholog_one2many	67.3978	70.5335	25	0.03	0	0.96033	1.34918e-05	-0.142658	0.190496	1.07981	6.4537e-11
ENSDARG00000053131	irak3	ENSMUSG00000020227	Irak3	ortholog_one2one	32.0635	33.1691	25	0	0	0.974074	0.0157361	0.975712	2.44237e-10	0.43756	9.91979e-05
ENSDARG00000074337	cbfa2t2	ENSMUSG00000038533	Cbfa2t2	ortholog_one2one	67.3575	65.6566	50	59.04	0	0.978305	0.0574946	0.658117	7.58502e-08	0.947744	1.00742e-10
ENSDARG00000000489	upf3b	ENSMUSG00000036572	Upf3b	ortholog_one2one	53.9615	53.3898	75	53.56	1	0.979374	0.000587706	-0.154405	0.0930071	-1.17847	3.06487e-11
ENSDARG00000102080	mif4gda	ENSMUSG00000020743	Mif4gd	ortholog_one2many	70.7207	70.7207	50	0	0	0.981928	0.00303049	-0.894896	7.78151e-18	-0.200811	4.42662e-06
ENSDARG00000034396	mars	ENSMUSG00000040354	Mars	ortholog_one2one	60.7781	63.5165	75	19.53	1	0.984381	0.000861553	-0.944214	2.35327e-16	-0.532626	1.8289e-11
ENSDARG00000038290	thoc5	ENSMUSG00000034274	Thoc5	ortholog_one2one	68.5673	68.6676	0	91.7	1	1.00484	0.00216777	-0.566502	5.76328e-06	-0.769035	6.66155e-08
ENSDARG00000013415	lmna	ENSMUSG00000028063	Lmna	ortholog_one2one	65.4021	64.812	0	100	1	1.00712	0.0281127	0.0537083	0.806883	0.444885	0.00981513
ENSDARG00000070657	pa2g4b	ENSMUSG00000025364	Pa2g4	ortholog_one2many	84.1837	83.7563	50	94.28	1	1.01209	0.00526299	0.714689	2.72481e-05	1.07093	4.78485e-08
ENSDARG00000104710	psip1a	ENSMUSG00000028484	Psip1	ortholog_one2one	44.3099	34.6591	0	76.16	0	1.01366	0.00147161	-0.326059	7.90008e-05	0.115094	0.115671
ENSDARG00000104765	chek1	ENSMUSG00000032113	Chek1	ortholog_one2one	63.5922	55.042	0	95.24	1	1.03143	0.0197627	-0.681916	0.226276	-0.693171	0.216964
ENSDARG00000040730	wdr75	ENSMUSG00000025995	Wdr75	ortholog_one2one	51.8029	51.9277	25	54.85	0	1.03174	0.0010478	-0.66048	1.20046e-06	-0.962303	3.76444e-09
[truncated: 342 more rows]
