# Supplementary material for: Expression of Protein-Coding Gene Orthologs in Zebrafish and Mouse Inner Ear Non-sensory Supporting Cells
Source: Front Neurosci. 2019 Oct 18;13:1117. doi: 10.3389/fnins.2019.01117 (PMC6813431; doi:10.3389/fnins.2019.01117)
Supplement: Supplementary file 9 [file Data_Sheet_5.xlsx]

## Sheet: Deafness Genes
ZF Gene stable ID	ZF Gene name	Mouse gene stable ID	Mouse gene name	Locus	Reference	Homology type	%id. target Mouse gene identical to zebra gene	%id. zebra gene identical to target Mouse gene	Gene-order conservation score	Whole-genome alignment coverage	High confidence ortholog [0 low, 1 high]	ZF SC AVERAGE	Log2FC SC v. HC	SC v. HC FDR adj-P-Val	MOUSE DEITER AVERAGE	Log2FC DC v. IHC	DC v. IHC FDR adj-P-Val	MOUSE PILLAR AVERAGE	Log2FC PC v. IHC	PC v. IHC FDR adj-P-Val
ENSDARG00000069026	adcy1a	ENSMUSG00000020431	Adcy1	DFNB44	Ansar et al., 2004	ortholog_one2many	70.1077	69.8569	50	1.84	0	0.13	0	0.0573854	0.16148	-1.29327	1.29953e-06	0.464371	0.230653	0.124128
ENSDARG00000021137	adgrv1	ENSMUSG00000069170	Adgrv1	Usher 2C	Weston et al., 2004	ortholog_one2one	51.7909	50.9686	100	79.42	1	2.06667	-0.928447	1.76226e-06	0.0316476	0	1.1003e-13	0.28721	-0.696156	3.92871e-06
ENSDARG00000058088	aifm1	ENSMUSG00000036932	Aifm1	DFNX5	Zong et al., 2015	ortholog_one2one	55.7333	68.3007	0	5.49	0	41.2333	-0.936153	0.00149277	13.8499	-1.69831	5.23581e-16	23.0302	-0.964654	2.99876e-11
ENSDARG00000087204	AL807829.1	ENSMUSG00000039639	Kcne1	Jervell and Lange-Nielsen Syndrome	Tyson et al., 1997	ortholog_one2one	26.7717	26.3566	25	25.68	0	0	0	#N/A	0.991859	0	3.38715e-09	4.05994	0	1.81907e-16
ENSDARG00000086265	bsnd	ENSMUSG00000025418	Bsnd	DFNB73	Riazuddin et al., 2009	ortholog_one2one	28.5714	16.2866	25	0	0	0	0	1	0.218757	0	0.00493983	2.39812	0	1.23889e-16
ENSDARG00000052016	cabp2a	ENSMUSG00000024857	Cabp2	DFNB93	Schrauwen et al., 2012	ortholog_one2many	59.0698	57.4661	0	65.83	0	0.0133333	0	1	19.1631	-6.13601	5.20398e-35	208.277	-2.69391	1.1289e-27
ENSDARG00000102790	CABZ01109843.1	ENSMUSG00000020464	Pnpt1	DFNB70	von Ameln et al., 2012	ortholog_one2one	72.9167	13.41	0	33.08	0	0	0	0	5.45764	0.664543	2.18579e-06	6.08499	0.821521	7.7557e-08
ENSDARG00000105136	ccdc50	ENSMUSG00000038127	Ccdc50	DFNA44	Modamio-Hoybjor et al., 2007	ortholog_one2one	25.4733	48.5246	0	22.78	0	1.89	2.07039	5.22526e-06	2.30786	-0.554931	4.49518e-05	4.57686	0.432874	0.000280191
ENSDARG00000013628	cd164	ENSMUSG00000019818	Cd164	DFNA66	Nyegaard et al., 2015	ortholog_one2one	41.9162	35.533	50	22.74	0	61.7333	1.63304	1.06732e-05	169.932	0.950609	9.86462e-11	135.744	0.626538	1.43416e-07
ENSDARG00000013858	cdc14aa	ENSMUSG00000033502	Cdc14a	DFNB32/105	Masmoudi et al., 2003	ortholog_one2many	55.9122	54.8922	0	2.78	0	2.04	-4.80836	1.55812e-10	5.48763	-0.941447	2.91976e-17	10.0954	-0.0620014	0.108666
ENSDARG00000075211	chd7	ENSMUSG00000041235	Chd7	CHARGE Syndrome	Vissers et al., 2004	ortholog_one2one	62.293	65.5057	50	68.17	0	4.98	-2.92149	2.38901e-06	3.66297	-0.125073	0.0174677	5.73864	0.52262	1.68914e-10
ENSDARG00000102820	cib2	ENSMUSG00000037493	Cib2	DFNB48	Riazuddin et al., 2012	ortholog_one2one	75.4011	75.4011	50	1.68	0	7.17333	-4.70047	1.45601e-08	64.4722	-4.09564	2.35552e-27	199.273	-2.46764	1.51458e-22
ENSDARG00000070584	clic5b	ENSMUSG00000023959	Clic5	DFNB103	Seco et al., 2014	ortholog_one2many	78.0488	76.494	25	20.79	0	0.68	-8.76041	2.11479e-11	4.85971	-0.983726	1.92249e-14	5.96547	-0.687961	1.70349e-11
ENSDARG00000020679	clpp	ENSMUSG00000002660	Clpp	DFNB81	Jenkinson et al., 2013	ortholog_one2one	72.5564	70.9559	0	14.45	0	74.0967	0.452358	0.075246	89.9441	0.209363	0.0279977	91.7759	0.238449	0.0135275
ENSDARG00000102890	clrn1	ENSMUSG00000043850	Clrn1	Usher 3A	Adato et al., 1999	ortholog_one2one	55.144	53.6	50	94.54	1	0	0	1.40215e-12	0.614289	-6.88847	7.0129e-29	25.1044	-1.53559	2.11545e-17
ENSDARG00000024032	coch	ENSMUSG00000020953	Coch	DFNA9	Robertson et al., 1998	ortholog_one2one	58.4087	58.5145	100	17.53	1	9585.46	6.41876	1.12018e-06	230.247	2.29522	3.08798e-31	702.392	3.90431	3.36588e-35
ENSDARG00000009014	col11a1b	ENSMUSG00000027966	Col11a1	Stickler syndrome type II	Richards et al., 1997	ortholog_one2many	78.1698	78.6031	75	29.51	1	0.246667	0	0.00039392	3.81762	2.46551	1.39633e-19	1.83582	1.40926	2.20512e-13
ENSDARG00000012422	col11a2	ENSMUSG00000024330	Col11a2	DFNB53	Chen et al., 2005	ortholog_one2one	66.944	73.1515	50	13.24	0	4.82667	0	2.16105e-10	7.95257	1.58866	4.76055e-16	6.40817	1.27715	6.79801e-14
ENSDARG00000011407	col2a1b	ENSMUSG00000022483	Col2a1	Stickler syndrome	Admiraal et al., 2002	ortholog_one2many	81.7572	81.9771	0	2.5	0	32.5233	3.81968	5.13052e-09	1.66376	2.58844	2.56617e-13	2.45105	3.14739	9.9893e-16
ENSDARG00000002831	col4a4	ENSMUSG00000067158	Col4a4	Alport Syndrome	Hudson et al., 1994	ortholog_one2one	46.5269	46.195	50	0.09	0	0.696667	0	2.96396e-05	0.27192	1.28128	0.000109145	0.24179	1.11185	0.000962533
ENSDARG00000052063	col4a5	ENSMUSG00000031274	Col4a5	X-linked Alport Syndrome	Barker et al., 1990	ortholog_one2one	65.8145	65.4642	50	42.1	0	0.456667	0.908208	0.0423641	1.97823	1.23489	2.07931e-09	2.44491	1.54046	2.0315e-11
ENSDARG00000052061	col4a6	ENSMUSG00000031273	Col4a6	DFNX6	Rost et al., 2014	ortholog_one2one	52.8005	53.5186	50	0.46	0	1.01667	0.834813	0.0114275	0.121272	0	3.37822e-05	0	0	0.634542
ENSDARG00000031483	col9a1b	ENSMUSG00000026147	Col9a1	Stickler Syndrome	Muragaki et al., 1990	ortholog_one2many	58.1421	57.7633	75	16.19	1	37.1833	5.67062	9.78658e-12	7.03451	2.55047	3.52259e-21	2.2143	0.88287	1.3017e-10
ENSDARG00000024492	col9a2	ENSMUSG00000028626	Col9a2	Stickler Syndrome	Muragaki et al., 1990	ortholog_one2one	59.9132	60.1744	25	23.33	0	82.86	4.26492	6.17246e-11	37.2486	3.16657	1.22324e-22	11.4245	1.46152	2.39817e-15
ENSDARG00000062817	crym	ENSMUSG00000030905	Crym	DFNA40	Abe et al., 2003	ortholog_one2one	63.9576	57.8275	0	30.01	0	3.01333	0	4.29365e-09	0.240549	0.960845	0.0201075	0.655785	2.40774	1.2746e-09
ENSDARG00000042707	cx30.3	ENSMUSG00000046352	Gjb2	DFNB1A	Kelsell et al., 1997	ortholog_one2many	55.0562	65.0443	75	89.83	1	2.24667	-5.5019	7.60707e-09	1151.73	1.50628	7.08578e-17	773.905	0.932705	1.09762e-12
ENSDARG00000042866	cx35.4	ENSMUSG00000042367	Gjb3	DFNA2B	Xia et al., 1998	ortholog_one2one	56.25	63.3333	50	76.06	1	13.1933	0	9.61592e-06	0	0	1	0	0	1
ENSDARG00000053744	dcdc2b	ENSMUSG00000078552	Dcdc2b	DFNB66	Grati et al., 2015	ortholog_one2one	25.7271	40.0697	75	68.14	0	0.566667	-5.58938	2.45084e-08	0.0484378	0	1.80613e-10	0.58381	-1.13327	2.4846e-05
ENSDARG00000040485	dfna5b	ENSMUSG00000029821	Dfna5	DFNA5	Van Camp et al., 1995	ortholog_one2many	33.2627	30.6641	75	49.05	0	4.85333	-0.179581	0.56228	0.651225	0.0673859	0.705448	0.950942	0.613587	7.34426e-05
ENSDARG00000068166	dfnb31b	ENSMUSG00000039137	Whrn	DFNB31	Mburu et al., 2003	ortholog_one2many	42.9175	44.2266	0	0.16	0	0.186667	-3.3373	6.36764e-08	0.45623	-5.37162	2.70279e-29	2.49872	-2.91826	3.41277e-25
ENSDARG00000014956	diablob	ENSMUSG00000029433	Diablo	DFNA64	Cheng et al., 2011	ortholog_one2many	38.4615	40.0844	0	15.55	0	5.5	-1.24138	0.000188821	9.81994	-1.07041	4.50937e-20	11.2448	-0.874944	4.04471e-18
ENSDARG00000091293	dmxl2	ENSMUSG00000041268	Dmxl2	DFNA71	Chen et al., 2016	ortholog_one2one	70.1892	70.465	50	99.35	1	1.46333	-3.55424	5.80564e-09	0.862092	-2.08191	1.5374e-16	1.72292	-1.08297	6.23022e-12
ENSDARG00000086669	edn3b	ENSMUSG00000027524	Edn3	WS4B	Edery et al., 1996	ortholog_one2one	30.719	21.9626	0	0	0	0.123333	0	0.0114983	0.315707	0	3.59586e-11	0.133231	0	1.36654e-05
ENSDARG00000053498	ednrbb	ENSMUSG00000022122	Ednrb	WS4A	Attie et al., 1995	ortholog_one2many	58.9041	48.6425	0	0	0	0	0	1	0.517856	-6.04861	2.93338e-24	62.5448	0.867587	7.09709e-10
ENSDARG00000074742	elmod3	ENSMUSG00000056698	Elmod3	DFNB88	Jaworek et al., 2013	ortholog_one2one	46.5347	49.3438	0	28.73	0	0	0	1	12.0425	-0.657346	4.20919e-12	22.9038	0.270104	1.06662e-05
ENSDARG00000102128	eps8	ENSMUSG00000015766	Eps8	DFNB102	Behlouli et al., 2014	ortholog_one2one	59.9502	58.7089	0	50.55	0	1.01	-3.80667	1.19265e-09	12.9921	1.09294	5.24902e-15	9.9449	0.707337	3.41981e-11
ENSDARG00000058108	EPS8L2	ENSMUSG00000025504	Eps8l2	DFNB106	Dahmani et al., 2015	ortholog_one2many	60.7463	55.8299	0	42.25	0	0	0	#N/A	14.9092	-2.00325	1.93692e-22	22.5221	-1.40811	3.58858e-19
ENSDARG00000059887	eral1	ENSMUSG00000020832	Eral1		Chatzispyrou et al., 2017	ortholog_one2one	44.7427	45.7666	50	19.79	0	5.40333	-1.16388	4.25783e-06	18.0348	0.374824	5.40496e-06	12.6365	-0.138369	0.0438107
ENSDARG00000076414	espn	ENSMUSG00000028943	Espn	DFNB36	Naz et al., 2004	ortholog_one2one	54.5246	54.6498	50	62.54	0	1.11667	-5.92423	9.36853e-10	1.92716	-4.31539	5.86595e-27	7.1337	-2.42721	3.28462e-22
ENSDARG00000011245	esrp1	ENSMUSG00000040728	Esrp1		Rohacek et al., 2017	ortholog_one2one	62.605	65.6388	50	33.26	0	6.08	0.0441717	0.983858	9.45839	1.30682	1.63029e-19	11.6375	1.60593	4.5407e-21
ENSDARG00000100847	esrrb	ENSMUSG00000021255	Esrrb	DFNB35	Collin et al., 2008	ortholog_one2one	74.2729	73.1278	50	77.19	1	11.7667	1.92437	2.54366e-09	0.0197766	0	0.242568	0.189898	0	1.44473e-10
ENSDARG00000014259	eya1	ENSMUSG00000025932	Eya1		Niu et al., 2008	ortholog_one2one	84.2365	86.802	100	91.64	1	8.25667	-4.59854	1.76702e-12	37.9249	1.51553	5.3462e-26	17.7736	0.422124	1.46541e-14
ENSDARG00000012397	eya4	ENSMUSG00000010461	Eya4	DFNA10	Wayne et al., 2001	ortholog_one2one	73.8994	76.2987	0	1.88	0	2.37667	-5.8811	2.01401e-12	5.63189	-0.362532	1.04738e-06	9.25161	0.353554	1.18821e-06
ENSDARG00000061752	fam65b	ENSMUSG00000036006	Ripor2	DFNB104	Diaz-Horta et al., 2014	ortholog_one2one	53.0531	49.1651	50	35.89	0	0.81	-4.00222	1.11176e-07	1.79125	-1.60967	1.43212e-22	1.13883	-2.26309	2.41803e-24
ENSDARG00000009550	foxi3b	ENSMUSG00000047861	Foxi1		Jonard et al., 2010	ortholog_one2many	53.5248	55.1075	0	97.19	1	1.83	0	8.23873e-08	0	0	#N/A	0	0	#N/A
ENSDARG00000053074	gipc3	ENSMUSG00000034872	Gipc3	DFNB95	Charizopoulou et al., 2011	ortholog_one2one	61.8619	69.3603	25	23.52	0	1.49667	-8.26539	4.20613e-12	0.380214	-4.95638	2.86473e-18	1.14574	-3.36498	3.46176e-16
ENSDARG00000017311	gpsm2	ENSMUSG00000027883	Gpsm2	DFNB82	Walsh et al., 2010	ortholog_one2one	67.1803	64.2121	75	45.42	1	7.14	-1.40235	3.32274e-05	4.56554	-4.18729	1.47931e-28	11.1532	-2.89868	5.17386e-25
ENSDARG00000058342	grhl2a	ENSMUSG00000022286	Grhl2	DFNA28	Peters et al., 2002	ortholog_one2many	72.8785	70.08	0	5.15	0	4.45333	0	6.10641e-05	5.64714	1.10741	7.62029e-14	5.42817	1.05036	2.95309e-13
ENSDARG00000105434	GRXCR1	ENSMUSG00000068082	Grxcr1	DFNB25	Schraders et al., 2010	ortholog_one2many	65.0847	64.8649	0	63.73	0	0	0	#N/A	0.770092	-5.22514	2.50995e-22	5.08656	-2.50156	4.33653e-17
ENSDARG00000053692	GRXCR2	ENSMUSG00000073574	Grxcr2	DFNB101	Imtiaz et al., 2014	ortholog_one2one	41.6	40.9449	50	79.23	0	0.916667	-7.21596	2.09495e-13	4.13717	-5.60228	4.14618e-25	22.9752	-3.12891	4.98734e-20
ENSDARG00000003693	hars	ENSMUSG00000019143	Hars2	Perrault syndrome	Pierce et al., 2011	ortholog_one2many	58.8694	59.802	50	71.64	0	40.2467	-1.01095	0.00665146	14.2806	-0.00316959	1	10.0524	-0.509681	3.40733e-09
ENSDARG00000045544	hgfa	ENSMUSG00000028864	Hgf	DFNB39	Schultz et al., 2009	ortholog_one2many	47.3534	45.467	25	3.04	0	0.876667	0	6.03333e-06	0.00213228	0	1	0.0614285	0	0.0768836
ENSDARG00000101239	hsd17b4	ENSMUSG00000024507	Hsd17b4	Perrault Syndrome	Pierce et al., 2010	ortholog_one2many	68.4138	67.483	0	45.47	0	4.03	-1.55319	2.36123e-05	40.8371	1.10167	4.00801e-11	24.3444	0.355375	0.000855598
ENSDARG00000040910	ildr1b	ENSMUSG00000022900	Ildr1	DFNB42	Borck et al., 2011	ortholog_one2many	37.931	38.9199	0	10.52	0	8.61333	-1.89568	6.52612e-07	61.7542	0.98799	1.47269e-21	46.3839	0.575078	1.27639e-16
ENSDARG00000103799	kars	ENSMUSG00000031948	Kars	DFNB89	Santos-Cortez et al., 2013	ortholog_one2one	80.2326	77.4038	0	43.52	0	54.1833	-1.04427	6.54134e-05	46.0111	-0.288274	0.000725298	54.6062	-0.0411898	0.658188
ENSDARG00000090815	kcnj10a	ENSMUSG00000044708	Kcnj10		Bockenhauer et al., 2009	ortholog_one2many	62.5882	70.1847	0	5.54	0	0	0	#N/A	24.9692	0.411172	3.31886e-10	33.4881	0.834675	5.06769e-16
ENSDARG00000059798	kcnq1	ENSMUSG00000009545	Kcnq1	Jervell and Lange-Nielsen Syndrome	Neyroud et al., 1997	ortholog_one2one	61.2214	60.0299	25	32.55	0	7.56333	0	9.79602e-11	2.79925	1.55104	1.72908e-12	2.03019	1.08761	4.06452e-09
ENSDARG00000089490	kcnq4	ENSMUSG00000028631	Kcnq4	DFNA2A	Kubisch et al., 1999	ortholog_one2one	63.5838	15.8046	25	79.38	1	0	0	#N/A	1.82454	-0.982729	8.45034e-11	3.75717	0.0593881	0.575349
ENSDARG00000075337	lars2	ENSMUSG00000035202	Lars2		Pierce et al., 2013	ortholog_one2one	66.7247	42.4612	50	80.63	1	0.626667	-1.86326	0.00438295	15.3462	-0.341647	0.0664191	36.7474	0.918111	1.93619e-05
ENSDARG00000045023	lhfpl5a	ENSMUSG00000062252	Lhfpl5	DFNB66/67	Tlili et al., 2005	ortholog_one2many	64.2534	64.8402	50	68.18	0	0.0366667	0	4.69694e-14	12.1212	-5.93554	4.52904e-31	270.922	-1.45327	6.47492e-19
ENSDARG00000074638	loxhd1b	ENSMUSG00000032818	Loxhd1	DFNB77	Grillet et al., 2009	ortholog_one2many	51.7436	53.0948	25	13.54	0	0.00666667	0	5.6268e-13	0.301669	-4.74488	7.32411e-27	2.41891	-1.74155	1.42574e-20
ENSDARG00000025076	marveld2a	ENSMUSG00000021636	Marveld2	DFNB49	Riazuddin et al., 2006	ortholog_one2many	54.7203	56.3964	25	79.8	1	3.98667	-2.11362	5.22629e-07	5.65768	-2.61224	9.16145e-23	13.4443	-1.36353	3.78807e-17
ENSDARG00000102798	mcm2	ENSMUSG00000002870	Mcm2	DFNA70	Gao et al., 2015	ortholog_one2one	83.6895	82.3009	0	76.2	1	2.34667	0	0.00452685	3.12795	1.43747	9.0405e-05	0.0777341	0	4.25251e-05
ENSDARG00000070903	met	ENSMUSG00000009376	Met	DFNB97	Mujtaba et al., 2015	ortholog_one2one	51.7366	51.8492	50	66.64	0	7.57667	-0.245688	0.0984761	3.68585	3.20383	2.14795e-13	3.8437	3.26433	1.56187e-13
ENSDARG00000003732	mitfa	ENSMUSG00000035158	Mitf	WS2	Tassabehji et al., 1994	ortholog_one2many	65.6	62.3574	100	56.81	1	0.0766667	0	0.636387	0.992498	2.50023	1.12107e-11	0.844972	2.26807	2.30664e-10
ENSDARG00000045658	msrb3	ENSMUSG00000051236	Msrb3	DFNB74	Waryah et al., 2009	ortholog_one2one	66.129	66.129	75	65.32	1	25.01	-2.6778	4.96719e-08	29.1297	-1.11804	3.16448e-17	44.8126	-0.496628	2.25227e-10
ENSDARG00000073732	myh14	ENSMUSG00000030739	Myh14	DFNA4	Donaudy et al., 2004	ortholog_one2one	60.534	62.35	0	0	0	0.483333	-2.81019	2.61852e-07	13.6629	2.30531	5.98863e-18	9.94191	1.84664	1.13375e-15
ENSDARG00000001014	myh9b	ENSMUSG00000022443	Myh9	DFNA17	Lalwani et al., 2000	ortholog_one2one	81.6254	70.7143	25	100	1	2.84	1.50589	0.0628126	1.25626	1.43441	1.59494e-06	1.66921	1.84445	8.9161e-09
ENSDARG00000075292	myo15aa	ENSMUSG00000042678	Myo15	DFNB3	Wang et al., 1998	ortholog_one2many	54.6947	36.998	50	0.64	0	0.153333	-6.72288	5.62925e-12	0.441252	-4.37059	3.01908e-28	3.39511	-1.4268	1.2819e-20
ENSDARG00000010186	myo3a	ENSMUSG00000025716	Myo3a	DFNB30	Walsh et al., 2002	ortholog_one2one	53.8547	59.4695	50	50.89	0	0.473333	-4.3694	1.48017e-07	0.103816	-6.46967	1.03963e-24	1.18195	-2.9606	3.69573e-21
ENSDARG00000042141	myo6b	ENSMUSG00000033577	Myo6	DFNB37	Ahmed et al., 2003	ortholog_one2many	79.6584	81.2995	50	19.09	0	0.37	-7.58537	8.93786e-10	109.224	0.0846226	0.233604	33.7685	-1.60892	6.16876e-17
ENSDARG00000044632	myo7ab	ENSMUSG00000030761	Myo7a	DFNB2	Liu et al., 1997	ortholog_one2many	79.3167	77.5621	50	0	0	0.853333	0	0.000125688	1.18579	-4.21396	6.91799e-29	8.59887	-1.35566	4.54639e-20
ENSDARG00000098441	nars2	ENSMUSG00000018995	Nars2	DFNB94	Simon et al., 2015	ortholog_one2one	65.3608	66.457	75	32.6	1	1.62333	-1.21561	0.000121624	5.32002	-0.158907	0.420829	4.30786	-0.463368	0.015444
ENSDARG00000076569	ndp	ENSMUSG00000040138	Ndp	Norrie Disease	Rehm et al., 2002	ortholog_one2one	62.3188	65.6489	100	73.35	1	7.6	0	3.26524e-11	1.20468	-0.448528	0.0523563	2.96491	0.850809	8.95833e-05
ENSDARG00000076748	ntn2	ENSMUSG00000036473	Tbc1d24	DFNB86	Rehman et al., 2014	ortholog_one2one	51.5599	54.1379	0	21.09	0	0.133333	-1.58496	0.000591727	0.499864	2.22459	3.94952e-07	0.462634	2.11292	1.51906e-06
ENSDARG00000013830	osbpl2b	ENSMUSG00000039050	Osbpl2	DFNA67	Xing et al.,2014	ortholog_one2many	69.8073	67.3554	50	60.47	0	4.84333	-5.03049	2.8069e-09	25.3453	0.219433	1.67261e-06	21.2076	-0.0377036	0.334695
ENSDARG00000020581	otofb	ENSMUSG00000062372	Otof	DFNB9	Yasunaga et al., 1999	ortholog_one2many	76.757	76.5648	0	6.26	0	3.49	-7.69892	1.29599e-09	3.37875	-5.95894	8.41834e-33	38.0968	-2.46383	3.45673e-25
ENSDARG00000068460	otog	ENSMUSG00000009487	Otog	DFNB18B	Schraders et al., 2012	ortholog_one2one	41.1538	44.1086	0	37.36	0	0.546667	-1.87607	7.98305e-06	10.4875	-0.862878	2.18227e-18	47.4996	1.31637	5.84548e-22
ENSDARG00000088750	otogl	ENSMUSG00000091455	Otogl	DFNB84	Schraders et al., 2010	ortholog_one2one	48.8951	52.3441	25	49.16	0	0.0366667	0	3.52871e-12	8.62284	0.849643	5.46213e-17	11.8604	1.30957	1.37155e-20
ENSDARG00000002300	p2rx2	ENSMUSG00000029503	P2rx2	DFNA41	Yan et al., 2013	ortholog_one2one	50.5	40.6439	25	75.32	1	2.26667	-2.2841	5.24053e-07	223.695	1.13178	1.34529e-25	276.296	1.43646	6.12504e-27
ENSDARG00000010192	pax3a	ENSMUSG00000004872	Pax3	WS1,2	Hoth et al., 1993	ortholog_one2many	72.2986	76.0331	0	100	1	0	0	1	0	0	1	0	0	1
ENSDARG00000008127	pcdh15b	ENSMUSG00000052613	Pcdh15	DFNB23	Ahmed et al., 2003	ortholog_one2many	54.4835	53.474	50	7.29	0	1.14667	-3.83112	3.80264e-07	0.869238	0.250163	0.0026552	0.736773	0.011631	1
ENSDARG00000076974	pdzd7a	ENSMUSG00000074818	Pdzd7		Schneider et al., 2009	ortholog_one2many	44.2932	41.43	50	47.57	0	0.15	-6.6893	1.36752e-11	1.65842	0.730221	4.88191e-08	0.0584308	0	2.32218e-14
ENSDARG00000006206	pou4f3	ENSMUSG00000024497	Pou4f3	DFNA15	Vahava et al., 1998	ortholog_one2one	84.29	82.5444	50	100	1	1.32667	-8.01038	9.73624e-14	1.85488	-5.90252	2.89853e-27	14.1244	-2.97373	1.28339e-21
ENSDARG00000015524	prps1a	ENSMUSG00000031432	Prps1	DFNX1 (DFN2)	Liu et al., 2010	ortholog_many2many	96.8553	96.8553	0	100	1	28.0833	0.236128	0.440205	14.8849	0.243003	0.000928421	14.8088	0.235601	0.00130965
ENSDARG00000008849	ptprq	ENSMUSG00000035916	Ptprq	DFNB84	Schraders et al., 2010	ortholog_one2one	46.5884	46.6087	25	16.84	0	0.00666667	0	9.00638e-13	0.256678	-6.17203	1.33199e-27	7.2583	-1.35043	2.3362e-17
ENSDARG00000015176	ror1	ENSMUSG00000035305	Ror1		Diaz-Horta et al., 2016	ortholog_one2one	72.8421	73.8527	100	68.15	1	7.74333	4.38736	1.31808e-09	0.773456	1.02405	7.46659e-06	0.554999	0.545221	0.0151678
ENSDARG00000036548	s1pr2	ENSMUSG00000043895	S1pr2	DFNB68	Santos-Cortez et al., 2016	ortholog_one2one	54.0541	56.8182	50	85.72	1	8.23	0	4.59342e-07	20.0905	0.736214	6.84615e-11	19.1615	0.667911	4.4722e-10
ENSDARG00000036571	sema3e	ENSMUSG00000063531	Sema3e	CHARGE Syndrome	Lalani et al., 2004	ortholog_one2one	58.724	58.1936	100	44.76	1	22.2867	6.5171	2.82477e-12	0.12636	0	0.041903	0.0433048	0	0.955123
ENSDARG00000105391	si:cabz01059983.1	ENSMUSG00000033498	Strc	DFNB16	Campbell et al., 1997	ortholog_one2one	27.8202	18.1316	0	10.2	0	0	0	#N/A	0.343909	-2.38372	7.49834e-16	3.63928	1.01983	1.23309e-12
ENSDARG00000026473	six1b	ENSMUSG00000051367	Six1	DFNA23	Mosrati et al., 2011	ortholog_one2one	91.5493	91.5493	75	50.55	1	5.81	-3.47686	7.305e-11	34.3226	0.148992	0.000129525	20.948	-0.563356	5.17956e-14
ENSDARG00000068406	six5	ENSMUSG00000040841	Six5		Sampath et al., 2011	ortholog_one2one	32.2055	35.7441	0	43.41	0	5.46	-1.11304	5.81277e-08	3.36498	0.704833	0.0011415	1.08531	-0.927655	0.000447222
ENSDARG00000057728	slc17a8	ENSMUSG00000019935	Slc17a8	DFNA25	Ruel et al., 2008	ortholog_one2one	76.9492	75.5408	25	41.14	0	0.536667	-10.5897	3.90615e-14	1.40409	-5.15909	5.43464e-29	20.6609	-1.2799	7.3771e-18
ENSDARG00000069431	slc26a4	ENSMUSG00000020651	Slc26a4	DFNB4	Li et al., 1998	ortholog_one2one	53.9424	55.2564	50	60.41	0	0.0166667	0	0.814188	26.3345	3.68809	2.4881e-24	48.0833	4.55667	1.26682e-25
ENSDARG00000022424	slc26a5	ENSMUSG00000029015	Slc26a5	DFNB61	Liu et al., 2003	ortholog_one2one	51.4208	51.0753	25	25.17	0	19.0367	1.45577	2.40118e-05	1.43401	-2.72971	1.37994e-20	26.3851	1.47189	1.07564e-16
ENSDARG00000098769	slitrk6	ENSMUSG00000045871	Slitrk6		Tekin et al., 2013	ortholog_one2one	53.1325	52.5	0	68.24	0	0.65	-4.04686	1.08909e-07	16.5377	-1.65062	4.52663e-24	62.3093	0.263073	1.20471e-08
ENSDARG00000045302	smpx	ENSMUSG00000041476	Smpx	DFNX4 (DFN6)	del Castillo et al., 1996	ortholog_one2one	65.0602	63.5294	50	49.42	0	3.40333	-6.71309	1.89792e-13	12.8022	-4.30898	6.71778e-31	55.3348	-2.19719	1.0206e-24
ENSDARG00000040046	snai2	ENSMUSG00000022676	Snai2		Sanchez-Martin et al., 2002	ortholog_one2one	84.8249	81.0409	50	90.17	1	8.56	2.63993	1.76965e-07	0.223388	0	0.0258819	1.10657	0	7.9227e-09
ENSDARG00000059558	tecta	ENSMUSG00000037705	Tecta	DFNB21	Mustapha et al., 1999	ortholog_one2one	59.7456	61.0209	25	49.24	0	0.703333	-4.14888	7.57234e-10	0	0	1.02554e-18	0	0	1.81101e-18
ENSDARG00000023443	tjp2b	ENSMUSG00000024812	Tjp2	DFNA51	Walsh et al., 2010	ortholog_one2many	56.177	57.6692	25	50.13	0	57.5767	1.51518	2.31517e-07	10.8174	-0.388479	6.77135e-05	10.8573	-0.383161	8.32585e-05
ENSDARG00000056386	tmc1	ENSMUSG00000024749	Tmc1	DFNB7/11	Kurima et al., 2002	ortholog_one2one	49.3048	60.8983	75	34.64	0	0.48	-6.15903	3.44989e-11	0.913096	-6.31982	4.59026e-32	19.343	-1.91491	8.39849e-23
ENSDARG00000090830	tmem132e	ENSMUSG00000020701	Tmem132e	DFNB99	Li et al., 2015	ortholog_one2one	57.8998	55.959	0	73.44	0	1.91667	0.882016	0.00171397	0.0675636	0	0.00117708	0.0109038	0	0.622366
ENSDARG00000069423	tmie	ENSMUSG00000049555	Tmie	DFNB6	Naz et al., 2002	ortholog_one2one	35.0649	52.9412	0	17.11	0	0	0	1.18985e-13	1.80071	-2.66965	4.31908e-15	4.76651	-1.26528	1.41315e-09
ENSDARG00000036545	TMPRSS3 (1 of many)	ENSMUSG00000024034	Tmprss3	DFNB8/ 10	Scott et al., 2001	ortholog_one2many	41.3442	42.7368	0	8.26	0	0	0	7.24442e-11	150.437	-1.73239	1.98935e-26	265.844	-0.910975	1.65022e-20
ENSDARG00000021948	tnc	ENSMUSG00000028364	Tnc	DFNA56	Zhao et al., 2013	ortholog_one2many	54.169	48.5884	0	87.78	1	3.69	-3.78153	5.90028e-09	0.00200784	0	1	0.19306	0	3.1754e-06
ENSDARG00000101102	tprn	ENSMUSG00000048707	Tprn	DFNB79	Rehman et al., 2010	ortholog_one2one	29.1557	29.506	75	36.93	0	1.30667	-1.39791	0.000247616	5.96032	1.46733	9.87754e-13	2.18785	0.0214582	0.965512
ENSDARG00000006385	triobpb	ENSMUSG00000033088	Triobp	DFNB28	Shahin et al., 2006	ortholog_one2many	40.3071	10.427	25	6.97	0	1.90667	-2.53883	2.27012e-07	5.2252	-2.32124	8.29963e-23	10.3166	-1.33983	4.86178e-18
ENSDARG00000077580	tspeara	ENSMUSG00000069581	Tspear	DFNB98	Delmaghani et al., 2012	ortholog_one2many	53.8462	54.3284	25	7.99	0	0	0	0.956876	0.0464381	0	0.00550789	0	0	4.98382e-05
ENSDARG00000051876	ush1c	ENSMUSG00000030838	Ush1c	DFNB18	Ouyang et al., 2002	ortholog_one2one	69.3431	41.7582	25	93.67	1	1.36333	-6.75312	4.70759e-08	58.8	-0.860429	1.42929e-18	84.2518	-0.341538	1.08354e-10
ENSDARG00000004322	ush1ga	ENSMUSG00000045288	Ush1g	USH1G	Mustapha et al., 2002	ortholog_one2many	64.0306	54.4469	25	100	1	0.0333333	0	8.70188e-12	3.19189	-0.628581	1.91553e-09	1.32551	-1.89644	1.72828e-17
ENSDARG00000029482	ush2a	ENSMUSG00000026609	Ush2a	USH2A	Liu et al., 1999	ortholog_one2one	49.1512	49.6245	75	27.6	0	0.05	0	7.7175e-11	0.0191311	0	0.0208221	0	0	1
ENSDARG00000056605	wbp2	ENSMUSG00000034341	Wbp2		Buniello et al., 2016	ortholog_one2one	64.0152	64.751	0	87.24	1	8.48	-4.11959	1.16424e-06	186.146	-0.192602	0.132586	170.195	-0.321846	0.0137163
ENSDARG00000062341	wfs1a	ENSMUSG00000039474	Wfs1	DFNA6/14/38	Bespalova et al., 2001	ortholog_one2many	53.6313	53.9326	50	1.64	0	0.77	-2.48252	1.74026e-08	15.1196	0.68562	6.39825e-06	9.47054	0.010719	1
ENSDARG00000058630	zgc:162472	ENSMUSG00000049658	Bdp1	DFNB49	Girotto et al., 2013	ortholog_one2many	33.9552	7.37738	0	0.76	0	1.49667	-1.0918	0.000212381	0.769643	-1.59731	3.33242e-13	1.7966	-0.374302	0.000282981
