# Supplementary material for: Expression of Protein-Coding Gene Orthologs in Zebrafish and Mouse Inner Ear Non-sensory Supporting Cells
Source: PubMed Central journal article supplement (PMC6813431; doi:10.3389/fnins.2019.01117), 2019-10-18
Supplement: Table_1.pdf [file Table_1.pdf]

**Supplement Table 1. RNA-seq Datasets**

| Barta, C. L., Liu, H., Chen, L., Giffen, K. P., Li, Y., Kramer, K. L., et al. (2018). RNA-seq transcriptomic analysis of adult zebrafish inner ear hair cells. <i>Scientific Data</i> , 5, 180005. <i>NCBI Sequence Read Archive</i> SRP113243. doi: 10.1038/sdata.2018.5                                                                                                              |                  |               |                                     |              |
|----------------------------------------------------------------------------------------------------------------------------------------------------------------------------------------------------------------------------------------------------------------------------------------------------------------------------------------------------------------------------------------|------------------|---------------|-------------------------------------|--------------|
| Sample                                                                                                                                                                                                                                                                                                                                                                                 | SRA Accession ID | GEO Sample ID | Cell Type                           | Organism     |
| Zf nsSC 1                                                                                                                                                                                                                                                                                                                                                                              | SRX3022434       | GSM2712282    | GFP-neg Control surrounding cells 1 | Danio rerio  |
| Zf nsSC 2                                                                                                                                                                                                                                                                                                                                                                              | SRX3022435       | GSM2712283    | GFP-neg Control surrounding cells 2 | Danio rerio  |
| Zf nsSC 3                                                                                                                                                                                                                                                                                                                                                                              | SRX3022436       | GSM2712284    | GFP-neg Control surrounding cells 3 | Danio rerio  |
| Zf HC 1                                                                                                                                                                                                                                                                                                                                                                                | SRX3022431       | GSM2712279    | GFP+ Zebrafish Hair Cells 1         | Danio rerio  |
| Zf HC 2                                                                                                                                                                                                                                                                                                                                                                                | SRX3022432       | GSM2712280    | GFP+ Zebrafish Hair Cells 2         | Danio rerio  |
| Zf HC 3                                                                                                                                                                                                                                                                                                                                                                                | SRX3022433       | GSM2712281    | GFP+ Zebrafish Hair Cells 3         | Danio rerio  |
| Baumgart, M., Priebe, S., Groth, M., Hartmann, N., Menzel, U., Pandolfini, L., et al. (2016). Longitudinal RNA-seq analysis of vertebrate aging identifies mitochondrial complex I as a small-molecule-sensitive modifier of lifespan. <i>Cell Systems</i> , 2(2), 122-132. <i>NCBI Sequence Read Archive</i> SRP033093. doi: 10.1016/j.cels.2016.01.014                               |                  |               |                                     |              |
| Sample                                                                                                                                                                                                                                                                                                                                                                                 | SRA Accession ID | GEO Sample ID | Cell Type                           | Organism     |
| Zf Liver 1                                                                                                                                                                                                                                                                                                                                                                             | SRX893410        | GSM1620956    | liver182 12m control 8w rep1        | Danio rerio  |
| Zf Liver 2                                                                                                                                                                                                                                                                                                                                                                             | SRX893411        | GSM1620957    | liver183 12m control 8w rep2        | Danio rerio  |
| Zf Liver 3                                                                                                                                                                                                                                                                                                                                                                             | SRX893412        | GSM1620958    | liver184 12m control 8w rep3        | Danio rerio  |
| Oosterhof, N., Holtman, I. R., Kuil, L. E., van der Linde, H. C., Boddeke, E. W., Eggen, B. J., and van Ham, T. J. (2017). Identification of a conserved and acute neurodegeneration-specific microglial transcriptome in the zebrafish. <i>Glia</i> , 65(1), 138-149. <i>NCBI Sequence Read Archive</i> SRP089875. doi: 10.1002/glia.23083                                            |                  |               |                                     |              |
| Sample                                                                                                                                                                                                                                                                                                                                                                                 | SRA Accession ID | GEO Sample ID | Cell Type                           | Organism     |
| Zf Microglia 1                                                                                                                                                                                                                                                                                                                                                                         | SRX2163312       | GSM2310340    | Microglia control (Sample 1)        | Danio rerio  |
| Zf Microglia 2                                                                                                                                                                                                                                                                                                                                                                         | SRX2163316       | GSM2310344    | Microglia control (Sample 5)        | Danio rerio  |
| Zf Microglia 3                                                                                                                                                                                                                                                                                                                                                                         | SRX2163320       | GSM2310348    | Microglia control (Sample 9)        | Danio rerio  |
| Liu, H., Chen, L., Giffen, K. P., Stringham, S. T., Li, Y., Judge, P. D., et al. (2018). Cell-specific transcriptome analysis shows that adult pillar and deiters' cells express genes encoding machinery for specializations of cochlear hair cells. <i>Frontiers in Molecular Neuroscience</i> , 11, 356. <i>NCBI Sequence Read Archive</i> SRP133879. doi: 10.3389/fnmol.2018.00356 |                  |               |                                     |              |
| Sample                                                                                                                                                                                                                                                                                                                                                                                 | SRA Accession ID | GEO Sample ID | Cell Type                           | Organism     |
| Mouse Deiters 1                                                                                                                                                                                                                                                                                                                                                                        | SRX3757318       | GSM3028929    | Deiters_1                           | Mus musculus |
| Mouse Deiters 2                                                                                                                                                                                                                                                                                                                                                                        | SRX3757320       | GSM3028930    | Deiters_2                           | Mus musculus |
| Mouse Deiters 3                                                                                                                                                                                                                                                                                                                                                                        | SRX3757321       | GSM3028931    | Deiters_3                           | Mus musculus |
| Mouse Deiters 4                                                                                                                                                                                                                                                                                                                                                                        | SRX3757322       | GSM3028932    | Deiters_4                           | Mus musculus |
| Mouse Deiters 5                                                                                                                                                                                                                                                                                                                                                                        | SRX3757323       | GSM3028933    | Deiters_5                           | Mus musculus |
| Mouse Deiters 6                                                                                                                                                                                                                                                                                                                                                                        | SRX3757324       | GSM3028934    | Deiters_6                           | Mus musculus |
| Mouse Pillar 1                                                                                                                                                                                                                                                                                                                                                                         | SRX3757325       | GSM3028935    | Pillar_1                            | Mus musculus |
| Mouse Pillar 2                                                                                                                                                                                                                                                                                                                                                                         | SRX3757326       | GSM3028936    | Pillar_2                            | Mus musculus |
| Mouse Pillar 3                                                                                                                                                                                                                                                                                                                                                                         | SRX3757327       | GSM3028937    | Pillar_3                            | Mus musculus |
| Mouse Pillar 4                                                                                                                                                                                                                                                                                                                                                                         | SRX3757328       | GSM3028938    | Pillar_4                            | Mus musculus |
| Mouse Pillar 5                                                                                                                                                                                                                                                                                                                                                                         | SRX3757329       | GSM3028939    | Pillar_5                            | Mus musculus |
| Mouse Pillar 6                                                                                                                                                                                                                                                                                                                                                                         | SRX3757330       | GSM3028940    | Pillar_6                            | Mus musculus |
| Li, Y., Liu, H., Giffen, K. P., Chen, L., Beisel, K. W., and He, D. Z. Z. (2018). Transcriptomes of cochlear inner and outer hair cells from adult mice. <i>Scientific Data</i> , 5, 180199. <i>NCBI Sequence Read Archive</i> SRP133880. doi: 10.1038/sdata.2018.199                                                                                                                  |                  |               |                                     |              |
| Sample                                                                                                                                                                                                                                                                                                                                                                                 | SRA Accession ID | GEO Sample ID | Cell Type                           | Organism     |
| Mouse IHC 1                                                                                                                                                                                                                                                                                                                                                                            | SRX3757335       | GSM3028941    | IHC_1                               | Mus musculus |
| Mouse IHC 2                                                                                                                                                                                                                                                                                                                                                                            | SRX3757336       | GSM3028942    | IHC_2                               | Mus musculus |
| Mouse IHC 3                                                                                                                                                                                                                                                                                                                                                                            | SRX3757337       | GSM3028943    | IHC_3                               | Mus musculus |
| Mouse IHC 4                                                                                                                                                                                                                                                                                                                                                                            | SRX3757338       | GSM3028944    | IHC_4                               | Mus musculus |
| Mouse OHC 1                                                                                                                                                                                                                                                                                                                                                                            | SRX3757339       | GSM3028945    | OHC_1                               | Mus musculus |
| Mouse OHC 2                                                                                                                                                                                                                                                                                                                                                                            | SRX3757340       | GSM3028946    | OHC_2                               | Mus musculus |
| Mouse OHC 3                                                                                                                                                                                                                                                                                                                                                                            | SRX3757341       | GSM3028947    | OHC_3                               | Mus musculus |
| Mouse OHC 4                                                                                                                                                                                                                                                                                                                                                                            | SRX3757343       | GSM3028948    | OHC_4                               | Mus musculus |
| Mouse OHC 5                                                                                                                                                                                                                                                                                                                                                                            | SRX3757344       | GSM3028949    | OHC_5                               | Mus musculus |
| Mouse OHC 6                                                                                                                                                                                                                                                                                                                                                                            | SRX3757345       | GSM3028950    | OHC_6                               | Mus musculus |
| Fradejas-Villar, N., Seeher, S., Anderson, C. B., Doengi, M., Carlson, B. A., Hatfield, D. L., et al. (2017). The RNA-binding protein Secisbp2 differentially modulates UGA codon reassignment and RNA decay. <i>Nucleic Acids Research</i> , 45(7), 4094-4107. <i>NCBI Sequence Read Archive</i> SRP078005. doi: 10.1093/nar/gkw1255                                                  |                  |               |                                     |              |
| Sample                                                                                                                                                                                                                                                                                                                                                                                 | SRA Accession ID | GEO Sample ID | Cell Type                           | Organism     |
| Mouse Liver 1                                                                                                                                                                                                                                                                                                                                                                          | SRX1900397       | GSM2227376    | Secisbp2 wild type liver Rep1       | Mus musculus |
| Mouse Liver 2                                                                                                                                                                                                                                                                                                                                                                          | SRX1900398       | GSM2227377    | Secisbp2 wild type liver Rep2       | Mus musculus |
| Mouse Liver 3                                                                                                                                                                                                                                                                                                                                                                          | SRX1900401       | GSM2227380    | Trsp wild type liver Rep1           | Mus musculus |
| Mouse Liver 4                                                                                                                                                                                                                                                                                                                                                                          | SRX1900402       | GSM2227381    | Trsp wild type liver Rep2           | Mus musculus |
